# Supplementary material for: Genomic DNA Sequences from Mastodon and Woolly Mammoth Reveal Deep Speciation of Forest and Savanna Elephants
Source: PLoS Biol. 2010 Dec 21;8(12):e1000564. doi: 10.1371/journal.pbio.1000564 (PMC3006346; doi:10.1371/journal.pbio.1000564)
Supplement: Dataset S2 — Table with polymorphic positions. (1.49 MB XLS) [file pbio.1000564.s002.xls]

## Sheet: Supplementary Online File 2
target ID	position	Mastodon	derived type	african elepahnt genome - savannah	pseudo-mastodon	pseudo-savannah-reference	savannah - SE2100	forest - DS1535	asian - Ema10	asian - Ema2	Mammoth - SP1349-SC	Ancestral	Het	Derived	savannah ancestral	savannah derived	savannah total	savannah derived freq	forest ancestral	forest derived	forest total	forest derived freq	asian ancestral	asian derived	asian total	asian derived freq	mammoth ancestral	mammoth derived	mammoth total	mammoth derived freq
A001	51	A	G	G	AA	GG	GG	GG	GG	GG	GG	AA	AG	GG	0	3	3	100	0	2	2	100	0	4	4	100	0	2	2	100
A001	59	G	T	G	GG	GG	GG	GG	GG	GT	GG	GG	GT	TT	3	0	3	0	2	0	2	0	3	1	4	25	2	0	2	0
A001	87	T	G	G	TT	GG	GG	GG	GG	GG	GG	TT	TG	GG	0	3	3	100	0	2	2	100	0	4	4	100	0	2	2	100
A001	127	A	C	A	AA	AA	AA	AA	AC	AC	AA	AA	AC	CC	3	0	3	0	2	0	2	0	2	2	4	50	2	0	2	0
A003	23	C	G	G	CC	GG	GG	GG	GG	GG	GG	CC	CG	GG	0	3	3	100	0	2	2	100	0	4	4	100	0	2	2	100
A003	49	T	C	C	TT	CC	CC	CC	CC	CC	CC	TT	TC	CC	0	3	3	100	0	2	2	100	0	4	4	100	0	2	2	100
A003	64	C	T	C	CC	CC	CC	TT	CC	CC	CC	CC	CT	TT	3	0	3	0	0	2	2	100	4	0	4	0	2	0	2	0
A003	80	C	T	T	CC	TT	TT	CC	CC	CC	CC	CC	CT	TT	0	3	3	100	2	0	2	0	4	0	4	0	2	0	2	0
A003	111	A	G	G	AA	GG	GG	GG	GG	GG	GG	AA	AG	GG	0	3	3	100	0	2	2	100	0	4	4	100	0	2	2	100
A007	13	C	A	A	CC	AA	AA	AA	AA	AA	AA	CC	CA	AA	0	3	3	100	0	2	2	100	0	4	4	100	0	2	2	100
A007	34	T	C	C	TT	CC	CC	TT	TT	TT	TT	TT	TC	CC	0	3	3	100	2	0	2	0	4	0	4	0	2	0	2	0
A007	71	A	C	A	AA	AA	AA	CC	AA	AA	AA	AA	AC	CC	3	0	3	0	0	2	2	100	4	0	4	0	2	0	2	0
A007	72	A	T	T	AA	TT	TT	TT	TT	TT	TT	AA	AT	TT	0	3	3	100	0	2	2	100	0	4	4	100	0	2	2	100
A007	97	C	T	C	CC	CC	CC	CC	TT	TT	TT	CC	CT	TT	3	0	3	0	2	0	2	0	0	4	4	100	0	2	2	100
A007	98	C	T	T	CC	TT	TT	TT	TT	TT	TT	CC	CT	TT	0	3	3	100	0	2	2	100	0	4	4	100	0	2	2	100
A007	100	C	T	T	CC	TT	TT	TT	TT	TT	TT	CC	CT	TT	0	3	3	100	0	2	2	100	0	4	4	100	0	2	2	100
A009	6	G	A	A	GG	AA	AA	AA	AA	AA	AA	GG	GA	AA	0	3	3	100	0	2	2	100	0	4	4	100	0	2	2	100
A009	20	A	G	G	AA	GG	GG	GG	GG	GG	GG	AA	AG	GG	0	3	3	100	0	2	2	100	0	4	4	100	0	2	2	100
A009	21	C	T	T	CC	TT	TT	TT	TT	TT	TT	CC	CT	TT	0	3	3	100	0	2	2	100	0	4	4	100	0	2	2	100
A009	25	G	T	T	GG	TT	TT	TT	TT	TT	TT	GG	GT	TT	0	3	3	100	0	2	2	100	0	4	4	100	0	2	2	100
A009	31	C	T	T	CC	TT	TT	TT	TT	TT	TT	CC	CT	TT	0	3	3	100	0	2	2	100	0	4	4	100	0	2	2	100
A009	32	A	G	G	AA	GG	GG	GG	GG	GG	GG	AA	AG	GG	0	3	3	100	0	2	2	100	0	4	4	100	0	2	2	100
A009	51	C	T	T	CC	TT	TT	TT	TT	TT	TT	CC	CT	TT	0	3	3	100	0	2	2	100	0	4	4	100	0	2	2	100
A009	75	G	A	A	GG	AA	AA	AA	AA	AA	AA	GG	GA	AA	0	3	3	100	0	2	2	100	0	4	4	100	0	2	2	100
A012	2	T	C	C	TT	CC	CC	CC	CC	CC	CC	TT	TC	CC	0	3	3	100	0	2	2	100	0	4	4	100	0	2	2	100
A012	92	C	T	C	CC	CC	CC	TT	CC	CC	CC	CC	CT	TT	3	0	3	0	0	2	2	100	4	0	4	0	2	0	2	0
A012	100	A	G	G	AA	GG	GG	GG	GG	GG	GG	AA	AG	GG	0	3	3	100	0	2	2	100	0	4	4	100	0	2	2	100
A014	17	T	C	C	TT	CC	CC	CC	CC	CC	CC	TT	TC	CC	0	3	3	100	0	2	2	100	0	4	4	100	0	2	2	100
A014	29	T	C	C	TT	CC	CC	CC	CC	CC	CC	TT	TC	CC	0	3	3	100	0	2	2	100	0	4	4	100	0	2	2	100
A014	33	G	A	A	GG	AA	AA	AA	AA	AA	AA	GG	GA	AA	0	3	3	100	0	2	2	100	0	4	4	100	0	2	2	100
A014	36	A	G	A	AA	AA	AA	AG	AA	AA	AA	AA	AG	GG	3	0	3	0	1	1	2	50	4	0	4	0	2	0	2	0
A014	39	T	C	T	TT	TT	TT	TT	CC	CC	CC	TT	TC	CC	3	0	3	0	2	0	2	0	0	4	4	100	0	2	2	100
A014	47	A	T	T	AA	TT	TT	TT	TT	TT	TT	AA	AT	TT	0	3	3	100	0	2	2	100	0	4	4	100	0	2	2	100
A014	48	A	G	G	AA	GG	GG	GG	GG	GG	GG	AA	AG	GG	0	3	3	100	0	2	2	100	0	4	4	100	0	2	2	100
A014	55	A	C	C	AA	CC	CC	CC	CC	CC	CC	AA	AC	CC	0	3	3	100	0	2	2	100	0	4	4	100	0	2	2	100
A014	62	T	C	C	TT	CC	CC	CC	CC	CC	CC	TT	TC	CC	0	3	3	100	0	2	2	100	0	4	4	100	0	2	2	100
A014	71	A	G	G	AA	GG	GG	GG	GG	GG	GG	AA	AG	GG	0	3	3	100	0	2	2	100	0	4	4	100	0	2	2	100
A014	73	A	G	G	AA	GG	GG	GG	GG	GG	AG	AA	AG	GG	0	3	3	100	0	2	2	100	0	4	4	100	1	1	2	50
A014	78	G	A	A	GG	AA	AA	AA	AA	AA	AA	GG	GA	AA	0	3	3	100	0	2	2	100	0	4	4	100	0	2	2	100
A014	81	A	G	G	AA	GG	GG	GG	GG	GG	GG	AA	AG	GG	0	3	3	100	0	2	2	100	0	4	4	100	0	2	2	100
A016	89	T	C	C	TT	CC	CC	CC	CC	CC	CC	TT	TC	CC	0	3	3	100	0	2	2	100	0	4	4	100	0	2	2	100
A017	22	G	C	C	GG	CC	CC	CC		CC	CC	GG	GC	CC	0	3	3	100	0	2	2	100	0	2	2	100	0	2	2	100
A017	85	C	T	C	CC	CC	CC	CC		CT	CC	CC	CT	TT	3	0	3	0	2	0	2	0	1	1	2	50	2	0	2	0
A017	104	A	G	G	AA	GG	GG	GG		GG	GG	AA	AG	GG	0	3	3	100	0	2	2	100	0	2	2	100	0	2	2	100
A019	22	C	T	T	CC	TT	TT	TT	TT	TT	TT	CC	CT	TT	0	3	3	100	0	2	2	100	0	4	4	100	0	2	2	100
A019	99	A	G	A	AA	AA	AA	GG	AA	AA	AA	AA	AG	GG	3	0	3	0	0	2	2	100	4	0	4	0	2	0	2	0
A021	21	T	C	C	TT	CC	CC	CC		CC	CC	TT	TC	CC	0	3	3	100	0	2	2	100	0	2	2	100	0	2	2	100
A021	26	A	C	A	AA	AA	AA	AA		AA	AC	AA	AC	CC	3	0	3	0	2	0	2	0	2	0	2	0	1	1	2	50
A021	30	T	C	C	TT	CC	CC	CC		CC	CC	TT	TC	CC	0	3	3	100	0	2	2	100	0	2	2	100	0	2	2	100
A021	51	C	T	T	CC	TT	TT	CC		CC	CC	CC	CT	TT	0	3	3	100	2	0	2	0	2	0	2	0	2	0	2	0
A021	108	A	T	T	AA	TT	TT	TT		TT	TT	AA	AT	TT	0	3	3	100	0	2	2	100	0	2	2	100	0	2	2	100
A021	118	A	G	G	AA	GG	GG	GG		GG	GG	AA	AG	GG	0	3	3	100	0	2	2	100	0	2	2	100	0	2	2	100
A021	121	A	G	G	AA	GG	GG	GG		GG	GG	AA	AG	GG	0	3	3	100	0	2	2	100	0	2	2	100	0	2	2	100
A026	32	G	A	G	GG	GG	GA	GG	GG	GG	GG	GG	GA	AA	2	1	3	33.3333	2	0	2	0	4	0	4	0	2	0	2	0
A026	93	T	C	C	TT	CC	CC	CC	CC	CC	CC	TT	TC	CC	0	3	3	100	0	2	2	100	0	4	4	100	0	2	2	100
A026	94	G	A	G	GG	GG	GA	GG	GG	GG	GG	GG	GA	AA	2	1	3	33.3333	2	0	2	0	4	0	4	0	2	0	2	0
A033	23	T	C	C	TT	CC	TT	TT	TT	TT	TT	TT	TC	CC	2	1	3	33.3333	2	0	2	0	4	0	4	0	2	0	2	0
A033	60	A	T	A	AA	AA	AA	AA	TT	TT	AA	AA	AT	TT	3	0	3	0	2	0	2	0	0	4	4	100	2	0	2	0
A033	95	T	C	C	TT	CC	CC	CC	CC	CC	CC	TT	TC	CC	0	3	3	100	0	2	2	100	0	4	4	100	0	2	2	100
A033	111	A	T	A	AA	AA	AA	AT	AA	AA	AA	AA	AT	TT	3	0	3	0	1	1	2	50	4	0	4	0	2	0	2	0
A034	52	G	A	G	GG	GG	GG	GG	AA	AA	AA	GG	GA	AA	3	0	3	0	2	0	2	0	0	4	4	100	0	2	2	100
A034	59	T	C	C	TT	CC	CC	CC	CC	CC	CC	TT	TC	CC	0	3	3	100	0	2	2	100	0	4	4	100	0	2	2	100
A034	89	T	C	C	TT	CC	CC	CC	CC	CC	CC	TT	TC	CC	0	3	3	100	0	2	2	100	0	4	4	100	0	2	2	100
A036	47	A	G	G	AA	GG	GG	GG	GG	GG	GG	AA	AG	GG	0	3	3	100	0	2	2	100	0	4	4	100	0	2	2	100
A038	2	T	C	C	TT	CC	CC	CC	CC	CC	CC	TT	TC	CC	0	3	3	100	0	2	2	100	0	4	4	100	0	2	2	100
A038	4	T	C	C	TT	CC	CC	CC	CC	CC	CC	TT	TC	CC	0	3	3	100	0	2	2	100	0	4	4	100	0	2	2	100
A038	28	T	C	C	TT	CC	CC	CC	CC	CC	CC	TT	TC	CC	0	3	3	100	0	2	2	100	0	4	4	100	0	2	2	100
A038	57	G	A	G	GG	GG	GG	GG	GG	GG	AA	GG	GA	AA	3	0	3	0	2	0	2	0	4	0	4	0	0	2	2	100
A042	27	T	C	C	TT	CC	CC	CC	CC	CC	CC	TT	TC	CC	0	3	3	100	0	2	2	100	0	4	4	100	0	2	2	100
A042	60	A	G	A	AA	AA	AA	AA	AA	AG	AA	AA	AG	GG	3	0	3	0	2	0	2	0	3	1	4	25	2	0	2	0
A044	13	T	C	C	TT	CC	CC	CC	CC	CC	CC	TT	TC	CC	0	3	3	100	0	2	2	100	0	4	4	100	0	2	2	100
A044	54	A	G	G	AA	GG	GG	GG	GG	GG	GG	AA	AG	GG	0	3	3	100	0	2	2	100	0	4	4	100	0	2	2	100
A044	55	G	A	G	GG	GG	GG	AA	GG	GG	GG	GG	GA	AA	3	0	3	0	0	2	2	100	4	0	4	0	2	0	2	0
A044	58	C	T	T	CC	TT	TT	TT	TT	TT	TT	CC	CT	TT	0	3	3	100	0	2	2	100	0	4	4	100	0	2	2	100
A044	68	T	C	C	TT	CC	CC	CC	CC	CC	CC	TT	TC	CC	0	3	3	100	0	2	2	100	0	4	4	100	0	2	2	100
A044	81	C	T	T	CC	TT	TT	CC	CC	CC	CC	CC	CT	TT	0	3	3	100	2	0	2	0	4	0	4	0	2	0	2	0
A046	34	G	T	G	GG	GG	GG	GG	GG	GG	GT	GG	GT	TT	3	0	3	0	2	0	2	0	4	0	4	0	1	1	2	50
A046	48	C	A	A	CC	AA	AA	AA	AA	AA	AA	CC	CA	AA	0	3	3	100	0	2	2	100	0	4	4	100	0	2	2	100
A047	44	G	A	G	GG	GG	GG	GG	AA	AA	AA	GG	GA	AA	3	0	3	0	2	0	2	0	0	4	4	100	0	2	2	100
A047	46	A	G	A	AA	AA	AA	AA	GG	GG	AA	AA	AG	GG	3	0	3	0	2	0	2	0	0	4	4	100	2	0	2	0
A047	47	T	C	C	TT	CC	CC	TC	CC	CC	CC	TT	TC	CC	0	3	3	100	1	1	2	50	0	4	4	100	0	2	2	100
A047	65	G	A	A	GG	AA	AA	AA	AA	AA	AA	GG	GA	AA	0	3	3	100	0	2	2	100	0	4	4	100	0	2	2	100
A047	67	C	G	C	CC	CC	CC	CG	CC	CC	CC	CC	CG	GG	3	0	3	0	1	1	2	50	4	0	4	0	2	0	2	0
A047	68	T	G	G	TT	GG	GG	GG	GG	GG	GG	TT	TG	GG	0	3	3	100	0	2	2	100	0	4	4	100	0	2	2	100
A047	75	C	T	T	CC	TT	TT	TT	TT	TT	TT	CC	CT	TT	0	3	3	100	0	2	2	100	0	4	4	100	0	2	2	100
A048	18	T	C	C	TT	CC	CC	CC	CC	CC	CC	TT	TC	CC	0	3	3	100	0	2	2	100	0	4	4	100	0	2	2	100
A048	28	T	C	C	TT	CC	CC	CC	CC	CC	CC	TT	TC	CC	0	3	3	100	0	2	2	100	0	4	4	100	0	2	2	100
A048	46	T	C	C	TT	CC	CC	CC	CC	CC	CC	TT	TC	CC	0	3	3	100	0	2	2	100	0	4	4	100	0	2	2	100
A048	57	T	C	C	TT	CC	CC	CC	CC	CC	CC	TT	TC	CC	0	3	3	100	0	2	2	100	0	4	4	100	0	2	2	100
A048	93	C	T	C	CC	CC	CC	CC	CC	CT	CC	CC	CT	TT	3	0	3	0	2	0	2	0	3	1	4	25	2	0	2	0
A050	16	A	C	C	AA	CC	CC	CC	CC	CC	CC	AA	AC	CC	0	3	3	100	0	2	2	100	0	4	4	100	0	2	2	100
A050	90	A	G	A	AA	AA	AA	AA	AA	AA	AG	AA	AG	GG	3	0	3	0	2	0	2	0	4	0	4	0	1	1	2	50
A050	101	T	C	T	TT	TT	TT	CC	TT	TT	TT	TT	TC	CC	3	0	3	0	0	2	2	100	4	0	4	0	2	0	2	0
A052	55	A	C	A	AA	AA	AA	AA	AA	AA	CC	AA	AC	CC	3	0	3	0	2	0	2	0	4	0	4	0	0	2	2	100
A052	66	T	C	C	TT	CC	CC	CC	CC	CC	CC	TT	TC	CC	0	3	3	100	0	2	2	100	0	4	4	100	0	2	2	100
A052	92	A	G	G	AA	GG	GG	GG	GG	GG	GG	AA	AG	GG	0	3	3	100	0	2	2	100	0	4	4	100	0	2	2	100
A054	18	T	C	C	TT	CC	CC	CC	CC	CC	CC	TT	TC	CC	0	3	3	100	0	2	2	100	0	4	4	100	0	2	2	100
A054	19	C	A	A	CC	AA	AA	AA	AA	AA	AA	CC	CA	AA	0	3	3	100	0	2	2	100	0	4	4	100	0	2	2	100
A054	55	A	G	G	AA	GG	GG	GG	GG	GG	GG	AA	AG	GG	0	3	3	100	0	2	2	100	0	4	4	100	0	2	2	100
A054	104	A	G	G	AA	GG	GG	GG	GG	GG	GG	AA	AG	GG	0	3	3	100	0	2	2	100	0	4	4	100	0	2	2	100
A057	48	C	T	C	CC	CC	CC	CT		CC	CC	CC	CT	TT	3	0	3	0	1	1	2	50	2	0	2	0	2	0	2	0
A057	69	A	G	G	AA	GG	GG	GG		GG	GG	AA	AG	GG	0	3	3	100	0	2	2	100	0	2	2	100	0	2	2	100
A057	91	G	C	C	GG	CC	GC	GG		GG	GG	GG	GC	CC	1	2	3	66.6667	2	0	2	0	2	0	2	0	2	0	2	0
A057	101	A	G	G	AA	GG	GG	GG		GG	GG	AA	AG	GG	0	3	3	100	0	2	2	100	0	2	2	100	0	2	2	100
A057	102	A	G	G	AA	GG	GG	GG		GG	GG	AA	AG	GG	0	3	3	100	0	2	2	100	0	2	2	100	0	2	2	100
A069	25	G	C	G	GG	GG	GG	GG	GG	GG	GC	GG	GC	CC	3	0	3	0	2	0	2	0	4	0	4	0	1	1	2	50
A069	38	T	C	C	TT	CC	CC	CC	CC	CC	CC	TT	TC	CC	0	3	3	100	0	2	2	100	0	4	4	100	0	2	2	100
A069	41	C	A	A	CC	AA	AA	AA	AA	AA	AA	CC	CA	AA	0	3	3	100	0	2	2	100	0	4	4	100	0	2	2	100
A069	106	G	C	G	GG	GG	GG	GG	CC	CC	GG	GG	GC	CC	3	0	3	0	2	0	2	0	0	4	4	100	2	0	2	0
A069	113	G	C	C	GG	CC	CC	CC	CC	CC	CC	GG	GC	CC	0	3	3	100	0	2	2	100	0	4	4	100	0	2	2	100
A071	11	T	C	C	TT	CC	CC	CC	CC	CC	CC	TT	TC	CC	0	3	3	100	0	2	2	100	0	4	4	100	0	2	2	100
A071	34	C	T	C	CC	CC	CC	CC	TT	TT	CC	CC	CT	TT	3	0	3	0	2	0	2	0	0	4	4	100	2	0	2	0
A075	28	T	G	G	TT	GG	GG	GG	GG	GG	GG	TT	TG	GG	0	3	3	100	0	2	2	100	0	4	4	100	0	2	2	100
A075	45	A	C	A	AA	AA	AA	AC	AA	AA	AA	AA	AC	CC	3	0	3	0	1	1	2	50	4	0	4	0	2	0	2	0
A075	85	A	G	G	AA	GG	GG	GG	GG	GG	GG	AA	AG	GG	0	3	3	100	0	2	2	100	0	4	4	100	0	2	2	100
A075	86	A	G	G	AA	GG	GG	GG	GG	GG	GG	AA	AG	GG	0	3	3	100	0	2	2	100	0	4	4	100	0	2	2	100
A075	87	G	T	T	GG	TT	TT	TT	TT	TT	TT	GG	GT	TT	0	3	3	100	0	2	2	100	0	4	4	100	0	2	2	100
A075	96	T	A	A	TT	AA	AA	AA	AA	AA	AA	TT	TA	AA	0	3	3	100	0	2	2	100	0	4	4	100	0	2	2	100
A075	97	G	T	T	GG	TT	TT	TT	TT	TT	TT	GG	GT	TT	0	3	3	100	0	2	2	100	0	4	4	100	0	2	2	100
A075	100	A	T	T	AA	TT	TT	TT	TT	TT	TT	AA	AT	TT	0	3	3	100	0	2	2	100	0	4	4	100	0	2	2	100
A075	102	C	A	A	CC	AA	AA	AA	AA	AA	AA	CC	CA	AA	0	3	3	100	0	2	2	100	0	4	4	100	0	2	2	100
A075	103	A	G	G	AA	GG	GG	GG	GG	GG	GG	AA	AG	GG	0	3	3	100	0	2	2	100	0	4	4	100	0	2	2	100
A075	106	G	T	T	GG	TT	TT	TT	TT	TT	TT	GG	GT	TT	0	3	3	100	0	2	2	100	0	4	4	100	0	2	2	100
A075	108	A	G	G	AA	GG	GG	GG	GG	GG	GG	AA	AG	GG	0	3	3	100	0	2	2	100	0	4	4	100	0	2	2	100
A076	48	T	C	C	TT	CC	CC	CC		CC	CC	TT	TC	CC	0	3	3	100	0	2	2	100	0	2	2	100	0	2	2	100
A076	97	G	A	G	GG	GG	GG	GG		GG	AA	GG	GA	AA	3	0	3	0	2	0	2	0	2	0	2	0	0	2	2	100
A076	107	T	G	G	TT	GG	GG	GG		GG	GG	TT	TG	GG	0	3	3	100	0	2	2	100	0	2	2	100	0	2	2	100
A076	108	A	T	T	AA	TT	TT	TT		TT	TT	AA	AT	TT	0	3	3	100	0	2	2	100	0	2	2	100	0	2	2	100
A076	110	T	G	T	TT	TT	TT	TG		TT	TT	TT	TG	GG	3	0	3	0	1	1	2	50	2	0	2	0	2	0	2	0
A076	114	T	G	T	TT	TT	TT	TT		GG	TT	TT	TG	GG	3	0	3	0	2	0	2	0	0	2	2	100	2	0	2	0
A076	132	T	G	G	TT	GG	GG	GG		GG	GG	TT	TG	GG	0	3	3	100	0	2	2	100	0	2	2	100	0	2	2	100
A077	58	G	A	A	GG	AA	AA	AA	AA	AA	AA	GG	GA	AA	0	3	3	100	0	2	2	100	0	4	4	100	0	2	2	100
A077	95	A	C	A	AA	AA	AA	AA	CC	CC	CC	AA	AC	CC	3	0	3	0	2	0	2	0	0	4	4	100	0	2	2	100
A077	132	C	T	C	CC	CC	CC	TT	CC	CC	CC	CC	CT	TT	3	0	3	0	0	2	2	100	4	0	4	0	2	0	2	0
A078	15	T	C	C	TT	CC	CC	CC		CC	CC	TT	TC	CC	0	3	3	100	0	2	2	100	0	2	2	100	0	2	2	100
A078	85	A	G	G	AA	GG	GG	GG		GG	GG	AA	AG	GG	0	3	3	100	0	2	2	100	0	2	2	100	0	2	2	100
A078	87	C	G	C	CC	CC	CC	CC		CG	CC	CC	CG	GG	3	0	3	0	2	0	2	0	1	1	2	50	2	0	2	0
A078	107	A	G	G	AA	GG	GG	GG		GG	GG	AA	AG	GG	0	3	3	100	0	2	2	100	0	2	2	100	0	2	2	100
A082	42	C	T	C	CC	CC	CC	CC	TT	TT	CC	CC	CT	TT	3	0	3	0	2	0	2	0	0	4	4	100	2	0	2	0
A083	23	T	C	C	TT	CC	CC	CC	CC	CC	CC	TT	TC	CC	0	3	3	100	0	2	2	100	0	4	4	100	0	2	2	100
A083	57	A	T	T	AA	TT	TT	TT	TT	TT	TT	AA	AT	TT	0	3	3	100	0	2	2	100	0	4	4	100	0	2	2	100
A083	68	C	G	G	CC	GG	GG	GG	CC	CC	CC	CC	CG	GG	0	3	3	100	0	2	2	100	4	0	4	0	2	0	2	0
A083	90	C	T	C	CC	CC	CC	CC	CC	CC	CT	CC	CT	TT	3	0	3	0	2	0	2	0	4	0	4	0	1	1	2	50
A084	12	C	T	C	CC	CC	CC	TT	CC	CC	CC	CC	CT	TT	3	0	3	0	0	2	2	100	4	0	4	0	2	0	2	0
A084	15	C	T	T	CC	TT	TT	TT	TT	TT	TT	CC	CT	TT	0	3	3	100	0	2	2	100	0	4	4	100	0	2	2	100
A084	36	T	C	T	TT	TT	TT	TT	TT	TT	TC	TT	TC	CC	3	0	3	0	2	0	2	0	4	0	4	0	1	1	2	50
A084	43	C	T	C	CC	CC	CC	TT	CC	CC	CC	CC	CT	TT	3	0	3	0	0	2	2	100	4	0	4	0	2	0	2	0
A084	78	C	G	G	CC	GG	GG	GG	CC	CC	CC	CC	CG	GG	0	3	3	100	0	2	2	100	4	0	4	0	2	0	2	0
A084	87	T	C	C	TT	CC	CC	CC	CC	CC	CC	TT	TC	CC	0	3	3	100	0	2	2	100	0	4	4	100	0	2	2	100
A084	93	G	T	G	GG	GG	GG	GG	TT	TT	TT	GG	GT	TT	3	0	3	0	2	0	2	0	0	4	4	100	0	2	2	100
A085	22	T	C	C	TT	CC	CC	CC	CC	CC	CC	TT	TC	CC	0	3	3	100	0	2	2	100	0	4	4	100	0	2	2	100
A085	23	T	C	C	TT	CC	CC	CC	CC	CC	CC	TT	TC	CC	0	3	3	100	0	2	2	100	0	4	4	100	0	2	2	100
A085	44	T	C	C	TT	CC	CC	CC	CC	CC	CC	TT	TC	CC	0	3	3	100	0	2	2	100	0	4	4	100	0	2	2	100
A085	59	T	C	C	TT	CC	CC	CC	CC	CC	CC	TT	TC	CC	0	3	3	100	0	2	2	100	0	4	4	100	0	2	2	100
A085	63	G	T	G	GG	GG	GG	TT	GG	GG	GG	GG	GT	TT	3	0	3	0	0	2	2	100	4	0	4	0	2	0	2	0
A085	68	A	G	G	AA	GG	GG	GG	GG	GG	GG	AA	AG	GG	0	3	3	100	0	2	2	100	0	4	4	100	0	2	2	100
A085	70	C	A	A	CC	AA	AA	AA	AA	AA	AA	CC	CA	AA	0	3	3	100	0	2	2	100	0	4	4	100	0	2	2	100
A085	89	C	T	T	CC	TT	TT	CC	CC	CC	CC	CC	CT	TT	0	3	3	100	2	0	2	0	4	0	4	0	2	0	2	0
A086	16	T	C	C	TT	CC	CC	CC	CC	CC	CC	TT	TC	CC	0	3	3	100	0	2	2	100	0	4	4	100	0	2	2	100
A086	17	G	A	G	GG	GG	GG	GG	GG	GG	AA	GG	GA	AA	3	0	3	0	2	0	2	0	4	0	4	0	0	2	2	100
A086	40	G	A	G	GG	GG	GG	GG	GG	GG	AA	GG	GA	AA	3	0	3	0	2	0	2	0	4	0	4	0	0	2	2	100
A086	62	G	A	G	GG	GG	GG	GG	GG	GG	AA	GG	GA	AA	3	0	3	0	2	0	2	0	4	0	4	0	0	2	2	100
A086	72	G	C	G	GG	GG	GG	GC	GG	GG	GG	GG	GC	CC	3	0	3	0	1	1	2	50	4	0	4	0	2	0	2	0
A086	86	T	C	C	TT	CC	CC	CC	CC	CC	CC	TT	TC	CC	0	3	3	100	0	2	2	100	0	4	4	100	0	2	2	100
A087	34	C	T	T	CC	TT	TT	TT	TT	TT	TT	CC	CT	TT	0	3	3	100	0	2	2	100	0	4	4	100	0	2	2	100
A087	57	G	T	T	GG	TT	TT	TT	TT	TT	TT	GG	GT	TT	0	3	3	100	0	2	2	100	0	4	4	100	0	2	2	100
A087	72	A	G	G	AA	GG	GG	GG	GG	GG	GG	AA	AG	GG	0	3	3	100	0	2	2	100	0	4	4	100	0	2	2	100
A087	77	C	T	T	CC	TT	TT	TT	TT	TT	TT	CC	CT	TT	0	3	3	100	0	2	2	100	0	4	4	100	0	2	2	100
A087	93	T	C	C	TT	CC	CC	CC	CC	CC	CC	TT	TC	CC	0	3	3	100	0	2	2	100	0	4	4	100	0	2	2	100
A090	8	T	C	C	TT	CC	CC	CC	CC		CC	TT	TC	CC	0	3	3	100	0	2	2	100	0	2	2	100	0	2	2	100
A090	24	T	C	C	TT	CC	CC	CC	CC		CC	TT	TC	CC	0	3	3	100	0	2	2	100	0	2	2	100	0	2	2	100
A090	101	C	G	G	CC	GG	GG	GG	GG		GG	CC	CG	GG	0	3	3	100	0	2	2	100	0	2	2	100	0	2	2	100
A090	107	C	G	G	CC	GG	CC	CC	CC		CC	CC	CG	GG	2	1	3	33.3333	2	0	2	0	2	0	2	0	2	0	2	0
A090	111	A	C	C	AA	CC	CC	CC	CC		CC	AA	AC	CC	0	3	3	100	0	2	2	100	0	2	2	100	0	2	2	100
A091	76	G	A	G	GG	GG	GG	AA	GG	GG	GG	GG	GA	AA	3	0	3	0	0	2	2	100	4	0	4	0	2	0	2	0
A091	81	T	A	T	TT	TT	TT	TT	TA	TT	TT	TT	TA	AA	3	0	3	0	2	0	2	0	3	1	4	25	2	0	2	0
A091	90	G	A	A	GG	AA	AA	AA	AA	AA	AA	GG	GA	AA	0	3	3	100	0	2	2	100	0	4	4	100	0	2	2	100
A091	99	T	C	C	TT	CC	CC	TT	TT	TT	TT	TT	TC	CC	0	3	3	100	2	0	2	0	4	0	4	0	2	0	2	0
A094	40	G	T	G	GG	GG	GG	GT	GG	GG	GG	GG	GT	TT	3	0	3	0	1	1	2	50	4	0	4	0	2	0	2	0
A094	94	G	A	A	GG	AA	AA	GA	AA	AA	AA	GG	GA	AA	0	3	3	100	1	1	2	50	0	4	4	100	0	2	2	100
A097	33	T	C	C	TT	CC	CC	CC	CC	CC	CC	TT	TC	CC	0	3	3	100	0	2	2	100	0	4	4	100	0	2	2	100
A097	36	T	C	C	TT	CC	CC	CC	CC	CC	CC	TT	TC	CC	0	3	3	100	0	2	2	100	0	4	4	100	0	2	2	100
A097	39	T	C	C	TT	CC	CC	CC	CC	CC	CC	TT	TC	CC	0	3	3	100	0	2	2	100	0	4	4	100	0	2	2	100
A097	51	A	C	A	AA	AA	AA	AC	AA	AA	AA	AA	AC	CC	3	0	3	0	1	1	2	50	4	0	4	0	2	0	2	0
A097	100	T	C	T	TT	TT	TT	TT	CC	CC	TT	TT	TC	CC	3	0	3	0	2	0	2	0	0	4	4	100	2	0	2	0
A097	118	T	C	C	TT	CC	CC	CC	CC	CC	CC	TT	TC	CC	0	3	3	100	0	2	2	100	0	4	4	100	0	2	2	100
A099	40	T	C	C	TT	CC	TC	TT	TT	TT	TT	TT	TC	CC	1	2	3	66.6667	2	0	2	0	4	0	4	0	2	0	2	0
A099	53	G	A	A	GG	AA	AA	AA	AA	AA	AA	GG	GA	AA	0	3	3	100	0	2	2	100	0	4	4	100	0	2	2	100
A099	79	G	A	G	GG	GG	GG	GG	GG	GG	AA	GG	GA	AA	3	0	3	0	2	0	2	0	4	0	4	0	0	2	2	100
A099	97	C	T	T	CC	TT	TT	TT	TT	TT	CT	CC	CT	TT	0	3	3	100	0	2	2	100	0	4	4	100	1	1	2	50
A099	98	A	G	G	AA	GG	GG	GG	GG	GG	GG	AA	AG	GG	0	3	3	100	0	2	2	100	0	4	4	100	0	2	2	100
A099	121	A	G	G	AA	GG	GG	GG	GG	GG	GG	AA	AG	GG	0	3	3	100	0	2	2	100	0	4	4	100	0	2	2	100
A099	125	A	G	G	AA	GG	GG	GG	GG	GG	GG	AA	AG	GG	0	3	3	100	0	2	2	100	0	4	4	100	0	2	2	100
A101	42	A	G	G	AA	GG	GG	GG		GG	GG	AA	AG	GG	0	3	3	100	0	2	2	100	0	2	2	100	0	2	2	100
A101	44	T	C	T	TT	TT	CC	CC		CC	CC	TT	TC	CC	1	2	3	66.6667	0	2	2	100	0	2	2	100	0	2	2	100
A101	52	T	C	C	TT	CC	CC	CC		CC	CC	TT	TC	CC	0	3	3	100	0	2	2	100	0	2	2	100	0	2	2	100
A101	55	C	T	T	CC	TT	CC	CC		CC	CC	CC	CT	TT	2	1	3	33.3333	2	0	2	0	2	0	2	0	2	0	2	0
A101	58	T	C	C	TT	CC	CC	CC		CC	CC	TT	TC	CC	0	3	3	100	0	2	2	100	0	2	2	100	0	2	2	100
A105	27	C	T	T	CC	TT	TT	TT		TT	TT	CC	CT	TT	0	3	3	100	0	2	2	100	0	2	2	100	0	2	2	100
A105	38	C	A	A	CC	AA	AA	AA		AA	AA	CC	CA	AA	0	3	3	100	0	2	2	100	0	2	2	100	0	2	2	100
A105	90	G	C	C	GG	CC	CC	GG		GG	GG	GG	GC	CC	0	3	3	100	2	0	2	0	2	0	2	0	2	0	2	0
A107	82	A	G	G	AA	GG	GG	GG	GG	GG	GG	AA	AG	GG	0	3	3	100	0	2	2	100	0	4	4	100	0	2	2	100
A107	107	G	A	A	GG	AA	AA	AA	AA	AA	AA	GG	GA	AA	0	3	3	100	0	2	2	100	0	4	4	100	0	2	2	100
A109	3	G	A	A	GG	AA	AA	AA	AA	AA	AA	GG	GA	AA	0	3	3	100	0	2	2	100	0	4	4	100	0	2	2	100
A109	13	T	C	C	TT	CC	CC	CC	CC	CC	CC	TT	TC	CC	0	3	3	100	0	2	2	100	0	4	4	100	0	2	2	100
A109	14	T	C	C	TT	CC	CC	CC	CC	CC	CC	TT	TC	CC	0	3	3	100	0	2	2	100	0	4	4	100	0	2	2	100
A109	29	T	C	C	TT	CC	CC	CC	CC	CC	CC	TT	TC	CC	0	3	3	100	0	2	2	100	0	4	4	100	0	2	2	100
A109	79	T	C	C	TT	CC	CC	CC	CC	CC	CC	TT	TC	CC	0	3	3	100	0	2	2	100	0	4	4	100	0	2	2	100
A109	90	G	C	C	GG	CC	CC	CC	CC	CC	CC	GG	GC	CC	0	3	3	100	0	2	2	100	0	4	4	100	0	2	2	100
A109	95	C	A	A	CC	AA	AA	AA	AA	AA	AA	CC	CA	AA	0	3	3	100	0	2	2	100	0	4	4	100	0	2	2	100
A112	21	C	T	C	CC	CC	CC	TT	CC	CC	CC	CC	CT	TT	3	0	3	0	0	2	2	100	4	0	4	0	2	0	2	0
A113	20	T	C	C	TT	CC	CC	CC	CC	CC	CC	TT	TC	CC	0	3	3	100	0	2	2	100	0	4	4	100	0	2	2	100
A113	60	G	A	G	GG	GG	GG	GG	GA	GG	GG	GG	GA	AA	3	0	3	0	2	0	2	0	3	1	4	25	2	0	2	0
A113	84	T	C	C	TT	CC	CC	CC	CC	CC	CC	TT	TC	CC	0	3	3	100	0	2	2	100	0	4	4	100	0	2	2	100
A113	93	C	T	T	CC	TT	TT	TT	CC	CC	CC	CC	CT	TT	0	3	3	100	0	2	2	100	4	0	4	0	2	0	2	0
A117	112	A	G	G	AA	GG	GG	GG	GG	GG	GG	AA	AG	GG	0	3	3	100	0	2	2	100	0	4	4	100	0	2	2	100
A122	49	A	G	A	AA	AA	AA	AA	AA	GG	AA	AA	AG	GG	3	0	3	0	2	0	2	0	2	2	4	50	2	0	2	0
A122	58	C	G	G	CC	GG	GG	GG	GG	GG	GG	CC	CG	GG	0	3	3	100	0	2	2	100	0	4	4	100	0	2	2	100
A122	59	G	C	C	GG	CC	CC	CC	CC	CC	CC	GG	GC	CC	0	3	3	100	0	2	2	100	0	4	4	100	0	2	2	100
A122	91	C	T	C	CC	CC	CC	CT	CC	CC	CC	CC	CT	TT	3	0	3	0	1	1	2	50	4	0	4	0	2	0	2	0
A123	58	A	G	A	AA	AA	AA	AA		GG	AA	AA	AG	GG	3	0	3	0	2	0	2	0	0	2	2	100	2	0	2	0
A127	69	G	T	T	GG	TT		TT		TT	TT	GG	GT	TT	0	1	1	100	0	2	2	100	0	2	2	100	0	2	2	100
A127	73	A	G	G	AA	GG		GG		GG	GG	AA	AG	GG	0	1	1	100	0	2	2	100	0	2	2	100	0	2	2	100
A127	107	A	T	A	AA	AA		AA		TT	TT	AA	AT	TT	1	0	1	0	2	0	2	0	0	2	2	100	0	2	2	100
A127	126	G	A	A	GG	AA		AA		AA	AA	GG	GA	AA	0	1	1	100	0	2	2	100	0	2	2	100	0	2	2	100
A128	23	G	A	A	GG	AA	AA	AA	AA	AA	AA	GG	GA	AA	0	3	3	100	0	2	2	100	0	4	4	100	0	2	2	100
A128	30	A	G	A	AA	AA	AA	AA	GG	GG	AA	AA	AG	GG	3	0	3	0	2	0	2	0	0	4	4	100	2	0	2	0
A128	61	A	T	T	AA	TT	TT	TT	TT	TT	TT	AA	AT	TT	0	3	3	100	0	2	2	100	0	4	4	100	0	2	2	100
A128	63	A	G	A	AA	AA	AA	AA	GG	GG	AA	AA	AG	GG	3	0	3	0	2	0	2	0	0	4	4	100	2	0	2	0
A133	50	C	G	G	CC	GG		GG	GG	GG	GG	CC	CG	GG	0	1	1	100	0	2	2	100	0	4	4	100	0	2	2	100
A133	59	T	C	T	TT	TT		TT	CC	CT	TT	TT	TC	CC	1	0	1	0	2	0	2	0	0	2	2	100	2	0	2	0
A133	62	C	T	C	CC	CC		CC	TT	CT	CC	CC	CT	TT	1	0	1	0	2	0	2	0	1	3	4	75	2	0	2	0
A133	81	A	C	A	AA	AA		AA	AC	AA	AA	AA	AC	CC	1	0	1	0	2	0	2	0	3	1	4	25	2	0	2	0
A133	91	A	G	G	AA	GG		GG	GG	GG	GG	AA	AG	GG	0	1	1	100	0	2	2	100	0	4	4	100	0	2	2	100
A133	101	A	G	G	AA	GG		GG	GG	GG	GG	AA	AG	GG	0	1	1	100	0	2	2	100	0	4	4	100	0	2	2	100
A133	104	A	G	G	AA	GG		GG	GG	GG	GG	AA	AG	GG	0	1	1	100	0	2	2	100	0	4	4	100	0	2	2	100
A138	32	G	A	G	GG	GG		GA	GG		GG	GG	GA	AA	1	0	1	0	1	1	2	50	2	0	2	0	2	0	2	0
A138	38	T	C	C	TT	CC		CC	CC		CC	TT	TC	CC	0	1	1	100	0	2	2	100	0	2	2	100	0	2	2	100
A138	41	T	C	C	TT	CC		CC	CC		CC	TT	TC	CC	0	1	1	100	0	2	2	100	0	2	2	100	0	2	2	100
A138	46	T	C	C	TT	CC		CC	CC		CC	TT	TC	CC	0	1	1	100	0	2	2	100	0	2	2	100	0	2	2	100
A138	73	C	T	C	CC	CC		CC	CT		CC	CC	CT	TT	1	0	1	0	2	0	2	0	1	1	2	50	2	0	2	0
A138	118	T	C	C	TT	CC		CC	TC		CC	TT	TC	CC	0	1	1	100	0	2	2	100	1	1	2	50	0	2	2	100
A140	31	T	C	C	TT	CC	CC	CC	CC	CC	CC	TT	TC	CC	0	3	3	100	0	2	2	100	0	4	4	100	0	2	2	100
A140	89	T	C	C	TT	CC	CC	CC	CC	CC	CC	TT	TC	CC	0	3	3	100	0	2	2	100	0	4	4	100	0	2	2	100
A141	3	T	C	C	TT	CC	CC	CC	CC	CC	CC	TT	TC	CC	0	3	3	100	0	2	2	100	0	4	4	100	0	2	2	100
A141	5	T	C	C	TT	CC	CC	CC	CC	CC	CC	TT	TC	CC	0	3	3	100	0	2	2	100	0	4	4	100	0	2	2	100
A141	8	A	C	A	AA	AA	AA	AA	AA	AA	CC	AA	AC	CC	3	0	3	0	2	0	2	0	4	0	4	0	0	2	2	100
A141	9	G	T	G	GG	GG	GG	GG	GG	GG	TT	GG	GT	TT	3	0	3	0	2	0	2	0	4	0	4	0	0	2	2	100
A141	18	C	G	G	CC	GG	CC	CC	CC	CC	CC	CC	CG	GG	2	1	3	33.3333	2	0	2	0	4	0	4	0	2	0	2	0
A141	96	T	G	G	TT	GG	GG	TG	TT	TT	TT	TT	TG	GG	0	3	3	100	1	1	2	50	4	0	4	0	2	0	2	0
A142	58	T	C	C	TT	CC	CC	CC	CC	CC	CC	TT	TC	CC	0	3	3	100	0	2	2	100	0	4	4	100	0	2	2	100
A142	83	T	G	T	TT	TT	TT	TT	TT	TT	GG	TT	TG	GG	3	0	3	0	2	0	2	0	4	0	4	0	0	2	2	100
A144	78	G	A	G	GG	GG	GG	GA	GG	GG	GG	GG	GA	AA	3	0	3	0	1	1	2	50	4	0	4	0	2	0	2	0
A144	117	A	G	G	AA	GG	GG	GG	GG	GG	GG	AA	AG	GG	0	3	3	100	0	2	2	100	0	4	4	100	0	2	2	100
A144	118	A	G	G	AA	GG	GG	GG	GG	GG	GG	AA	AG	GG	0	3	3	100	0	2	2	100	0	4	4	100	0	2	2	100
A145	9	T	C	C	TT	CC	CC	CC	CC	CC	CC	TT	TC	CC	0	3	3	100	0	2	2	100	0	4	4	100	0	2	2	100
A145	10	T	G	G	TT	GG	GG	GG	GG	GG	GG	TT	TG	GG	0	3	3	100	0	2	2	100	0	4	4	100	0	2	2	100
A145	42	T	C	C	TT	CC	CC	CC	CC	CC	CC	TT	TC	CC	0	3	3	100	0	2	2	100	0	4	4	100	0	2	2	100
A145	84	A	T	A	AA	AA	AA	AT	AA	AA	AA	AA	AT	TT	3	0	3	0	1	1	2	50	4	0	4	0	2	0	2	0
A145	102	G	A	A	GG	AA	AA	AA	AA	AA	AA	GG	GA	AA	0	3	3	100	0	2	2	100	0	4	4	100	0	2	2	100
A145	107	A	G	G	AA	GG	GG	GG	GG	GG	GG	AA	AG	GG	0	3	3	100	0	2	2	100	0	4	4	100	0	2	2	100
A146	19	A	C	C	AA	CC	CC	CC	CC	CC	CC	AA	AC	CC	0	3	3	100	0	2	2	100	0	4	4	100	0	2	2	100
A146	30	G	A	G	GG	GG	GG	GG	GG	GG	AA	GG	GA	AA	3	0	3	0	2	0	2	0	4	0	4	0	0	2	2	100
A146	78	C	T	T	CC	TT	TT	CC	CC	CC	CC	CC	CT	TT	0	3	3	100	2	0	2	0	4	0	4	0	2	0	2	0
A146	84	A	G	G	AA	GG	GG	GG	GG	GG	GG	AA	AG	GG	0	3	3	100	0	2	2	100	0	4	4	100	0	2	2	100
A148	88	C	T	T	CC	TT	TT	TT	TT	TT	TT	CC	CT	TT	0	3	3	100	0	2	2	100	0	4	4	100	0	2	2	100
A148	100	A	G	G	AA	GG	GG	GG	GG	GG	GG	AA	AG	GG	0	3	3	100	0	2	2	100	0	4	4	100	0	2	2	100
A148	107	C	A	A	CC	AA	AA	AA	AA	AA	AA	CC	CA	AA	0	3	3	100	0	2	2	100	0	4	4	100	0	2	2	100
A154	58	T	C	C	TT	CC		CC	CC	CC	CC	TT	TC	CC	0	1	1	100	0	2	2	100	0	4	4	100	0	2	2	100
A154	69	T	C	C	TT	CC		CC	CC	CC	CC	TT	TC	CC	0	1	1	100	0	2	2	100	0	4	4	100	0	2	2	100
A154	86	T	C	C	TT	CC		CC	CC	CC	CC	TT	TC	CC	0	1	1	100	0	2	2	100	0	4	4	100	0	2	2	100
A154	101	C	T	T	CC	TT		TT	TT	TT	TT	CC	CT	TT	0	1	1	100	0	2	2	100	0	4	4	100	0	2	2	100
A154	122	T	C	C	TT	CC		CC	TT	TT	TT	TT	TC	CC	0	1	1	100	0	2	2	100	4	0	4	0	2	0	2	0
A155	40	C	A	A	CC	AA	AA	AA	AA	AA	AA	CC	CA	AA	0	3	3	100	0	2	2	100	0	4	4	100	0	2	2	100
A155	42	A	C	C	AA	CC	CC	CC	CC	CC	CC	AA	AC	CC	0	3	3	100	0	2	2	100	0	4	4	100	0	2	2	100
A155	49	G	A	A	GG	AA	AA	AA	AA	AA	AA	GG	GA	AA	0	3	3	100	0	2	2	100	0	4	4	100	0	2	2	100
A155	58	C	T	T	CC	TT	TT	TT	TT	TT	TT	CC	CT	TT	0	3	3	100	0	2	2	100	0	4	4	100	0	2	2	100
A155	72	C	T	T	CC	TT	TT	TT	TT	TT	TT	CC	CT	TT	0	3	3	100	0	2	2	100	0	4	4	100	0	2	2	100
A155	88	A	G	G	AA	GG	GG	GG	GG	GG	GG	AA	AG	GG	0	3	3	100	0	2	2	100	0	4	4	100	0	2	2	100
A155	123	T	C	C	TT	CC	CC	CC	TT	TT	TT	TT	TC	CC	0	3	3	100	0	2	2	100	4	0	4	0	2	0	2	0
A156	38	C	T	C	CC	CC	CC	CC	CT	CC	TT	CC	CT	TT	3	0	3	0	2	0	2	0	3	1	4	25	0	2	2	100
A156	39	C	G	C	CC	CC	CC	CC	CC	CC	GG	CC	CG	GG	3	0	3	0	2	0	2	0	4	0	4	0	0	2	2	100
A156	57	A	C	C	AA	CC	AA	AA	AA	AA	AA	AA	AC	CC	2	1	3	33.3333	2	0	2	0	4	0	4	0	2	0	2	0
A156	58	C	A	A	CC	AA	CC	CC	CC	CC	CC	CC	CA	AA	2	1	3	33.3333	2	0	2	0	4	0	4	0	2	0	2	0
A156	67	A	C	A	AA	AA	AA	CC	AA	AA	AA	AA	AC	CC	3	0	3	0	0	2	2	100	4	0	4	0	2	0	2	0
A156	69	A	T	T	AA	TT	TT	TT	TT	TT	TT	AA	AT	TT	0	3	3	100	0	2	2	100	0	4	4	100	0	2	2	100
A156	90	C	T	T	CC	TT	TT	CC	CC	CC	CC	CC	CT	TT	0	3	3	100	2	0	2	0	4	0	4	0	2	0	2	0
A156	100	C	G	G	CC	GG	GG	GG	GG	GG	GG	CC	CG	GG	0	3	3	100	0	2	2	100	0	4	4	100	0	2	2	100
A165	115	T	C	C	TT	CC	CC	CC	CC	CC	CC	TT	TC	CC	0	3	3	100	0	2	2	100	0	4	4	100	0	2	2	100
A173	10	T	C	C	TT	CC	CC	CC	CC	CC	CC	TT	TC	CC	0	3	3	100	0	2	2	100	0	4	4	100	0	2	2	100
A173	29	T	C	C	TT	CC	CC	CC	CC	CC	CC	TT	TC	CC	0	3	3	100	0	2	2	100	0	4	4	100	0	2	2	100
A173	78	A	G	G	AA	GG	GG	GG	GG	GG	GG	AA	AG	GG	0	3	3	100	0	2	2	100	0	4	4	100	0	2	2	100
A178	21	T	C	C	TT	CC	CC	CC	CC	CC	CC	TT	TC	CC	0	3	3	100	0	2	2	100	0	4	4	100	0	2	2	100
A178	22	T	C	C	TT	CC	CC	CC	CC	CC	CC	TT	TC	CC	0	3	3	100	0	2	2	100	0	4	4	100	0	2	2	100
A178	28	T	A	T	TT	TT	TT	TT	AA	AA	AA	TT	TA	AA	3	0	3	0	2	0	2	0	0	4	4	100	0	2	2	100
A178	34	C	A	C	CC	CC	CC	CC	CC	CA	CC	CC	CA	AA	3	0	3	0	2	0	2	0	3	1	4	25	2	0	2	0
A178	39	G	A	A	GG	AA	AA	GA	GG	GG	GG	GG	GA	AA	0	3	3	100	1	1	2	50	4	0	4	0	2	0	2	0
A179	30	T	C	C	TT	CC	CC	CC	CC	CC	CC	TT	TC	CC	0	3	3	100	0	2	2	100	0	4	4	100	0	2	2	100
A179	31	T	C	C	TT	CC	CC	CC	CC	CC	CC	TT	TC	CC	0	3	3	100	0	2	2	100	0	4	4	100	0	2	2	100
A179	53	T	C	C	TT	CC	CC	CC	CC	CC	CC	TT	TC	CC	0	3	3	100	0	2	2	100	0	4	4	100	0	2	2	100
A180	75	T	C	C	TT	CC	CC	CC		CC	CC	TT	TC	CC	0	3	3	100	0	2	2	100	0	2	2	100	0	2	2	100
A186	40	T	C	C	TT	CC	CC	CC	CC	CC	CC	TT	TC	CC	0	3	3	100	0	2	2	100	0	4	4	100	0	2	2	100
A186	50	C	T	T	CC	TT	TT	TT	TT	TT	TT	CC	CT	TT	0	3	3	100	0	2	2	100	0	4	4	100	0	2	2	100
A186	60	T	C	C	TT	CC	CC	CC	CC	CC	CC	TT	TC	CC	0	3	3	100	0	2	2	100	0	4	4	100	0	2	2	100
A186	62	C	T	C	CC	CC	CC	CT	TT	TT	TT	CC	CT	TT	3	0	3	0	1	1	2	50	0	4	4	100	0	2	2	100
A186	96	G	A	A	GG	AA	AA	AA	AA	AA	AA	GG	GA	AA	0	3	3	100	0	2	2	100	0	4	4	100	0	2	2	100
A186	105	C	G	C	CC	CC	CC	CC	GG	GG	GG	CC	CG	GG	3	0	3	0	2	0	2	0	0	4	4	100	0	2	2	100
A186	125	C	T	C	CC	CC	CC	CC	TT	TT	TT	CC	CT	TT	3	0	3	0	2	0	2	0	0	4	4	100	0	2	2	100
A186	130	T	C	C	TT	CC	CC	CC	CC	CC	CC	TT	TC	CC	0	3	3	100	0	2	2	100	0	4	4	100	0	2	2	100
A190	49	A	G	G	AA	GG	GG	GG	GG	GG	GG	AA	AG	GG	0	3	3	100	0	2	2	100	0	4	4	100	0	2	2	100
A190	66	C	T	C	CC	CC	CC	CC	CC	CT	CT	CC	CT	TT	3	0	3	0	2	0	2	0	3	1	4	25	1	1	2	50
A190	87	A	G	G	AA	GG	GG	GG	GG	GG	GG	AA	AG	GG	0	3	3	100	0	2	2	100	0	4	4	100	0	2	2	100
A190	103	C	T	T	CC	TT	TT	TT	TT	TT	TT	CC	CT	TT	0	3	3	100	0	2	2	100	0	4	4	100	0	2	2	100
A191	34	A	G	G	AA	GG	GG	GG	GG	GG	GG	AA	AG	GG	0	3	3	100	0	2	2	100	0	4	4	100	0	2	2	100
A191	41	A	C	C	AA	CC	AA	CC	AA	AA	CC	AA	AC	CC	2	1	3	33.3333	0	2	2	100	4	0	4	0	0	2	2	100
A191	42	T	C	C	TT	CC	CC	CC	CC	CC	CC	TT	TC	CC	0	3	3	100	0	2	2	100	0	4	4	100	0	2	2	100
A191	77	C	T	T	CC	TT	TT	CC	TT	TT	CC	CC	CT	TT	0	3	3	100	2	0	2	0	0	4	4	100	2	0	2	0
A195	5	G	T	G	GG	GG	GG	TT	GG	GG	GG	GG	GT	TT	3	0	3	0	0	2	2	100	4	0	4	0	2	0	2	0
A195	17	C	T	T	CC	TT	TT	TT	TT	TT	TT	CC	CT	TT	0	3	3	100	0	2	2	100	0	4	4	100	0	2	2	100
A195	49	C	T	T	CC	TT	TT	TT	TT	TT	TT	CC	CT	TT	0	3	3	100	0	2	2	100	0	4	4	100	0	2	2	100
A195	56	T	C	C	TT	CC	CC	CC	CC	CC	CC	TT	TC	CC	0	3	3	100	0	2	2	100	0	4	4	100	0	2	2	100
A195	78	T	C	T	TT	TT	TT	CC	TT	TT	TT	TT	TC	CC	3	0	3	0	0	2	2	100	4	0	4	0	2	0	2	0
A195	82	C	G	G	CC	GG	GG	GG	GG	GG	GG	CC	CG	GG	0	3	3	100	0	2	2	100	0	4	4	100	0	2	2	100
A195	83	A	G	G	AA	GG	GG	GG	GG	GG	GG	AA	AG	GG	0	3	3	100	0	2	2	100	0	4	4	100	0	2	2	100
A195	85	A	G	G	AA	GG	GG	GG	GG	GG	GG	AA	AG	GG	0	3	3	100	0	2	2	100	0	4	4	100	0	2	2	100
A195	86	A	G	G	AA	GG	GG	GG	GG	GG	GG	AA	AG	GG	0	3	3	100	0	2	2	100	0	4	4	100	0	2	2	100
A195	89	A	G	G	AA	GG	GG	GG	GG	GG	GG	AA	AG	GG	0	3	3	100	0	2	2	100	0	4	4	100	0	2	2	100
A195	95	A	G	G	AA	GG	GG	GG	GG	GG	GG	AA	AG	GG	0	3	3	100	0	2	2	100	0	4	4	100	0	2	2	100
A196	5	G	A	A	GG	AA	AA	AA	AA	AA	AA	GG	GA	AA	0	3	3	100	0	2	2	100	0	4	4	100	0	2	2	100
A196	10	T	C	C	TT	CC	CC	CC	CC	CC	CC	TT	TC	CC	0	3	3	100	0	2	2	100	0	4	4	100	0	2	2	100
A196	31	G	A	A	GG	AA	AA	GG	GG	GG	GG	GG	GA	AA	0	3	3	100	2	0	2	0	4	0	4	0	2	0	2	0
A196	81	A	G	G	AA	GG	GG	GG	AA	AA	AA	AA	AG	GG	0	3	3	100	0	2	2	100	4	0	4	0	2	0	2	0
A196	86	G	A	A	GG	AA	AA	AA	AA	AA	AA	GG	GA	AA	0	3	3	100	0	2	2	100	0	4	4	100	0	2	2	100
A199	73	C	T	T	CC	TT	TT	CC	CC	CC	TT	CC	CT	TT	0	3	3	100	2	0	2	0	4	0	4	0	0	2	2	100
A199	74	T	G	G	TT	GG	GG	GG	GG	GG	GG	TT	TG	GG	0	3	3	100	0	2	2	100	0	4	4	100	0	2	2	100
A199	94	T	C	T	TT	TT	TT	TT	TC	TT	TT	TT	TC	CC	3	0	3	0	2	0	2	0	3	1	4	25	2	0	2	0
A200	32	A	G	G	AA	GG	GG	GG	GG	GG	GG	AA	AG	GG	0	3	3	100	0	2	2	100	0	4	4	100	0	2	2	100
A200	119	T	C	C	TT	CC	CC	CC	CC	CC	CC	TT	TC	CC	0	3	3	100	0	2	2	100	0	4	4	100	0	2	2	100
A201	13	A	C	A	AA	AA	AA	AA	AA	AA	CC	AA	AC	CC	3	0	3	0	2	0	2	0	4	0	4	0	0	2	2	100
A201	50	T	G	G	TT	GG	GG	GG	GG	GG	GG	TT	TG	GG	0	3	3	100	0	2	2	100	0	4	4	100	0	2	2	100
A201	88	C	T	T	CC	TT	TT	TT	TT	TT	TT	CC	CT	TT	0	3	3	100	0	2	2	100	0	4	4	100	0	2	2	100
A205	83	C	T	T	CC	TT	TT	TT	TT	TT	TT	CC	CT	TT	0	3	3	100	0	2	2	100	0	4	4	100	0	2	2	100
A205	94	G	A	G	GG	GG	GG	GA	GG	GG	GG	GG	GA	AA	3	0	3	0	1	1	2	50	4	0	4	0	2	0	2	0
A205	99	A	C	A	AA	AA	AA	AA	CC	CC	AA	AA	AC	CC	3	0	3	0	2	0	2	0	0	4	4	100	2	0	2	0
A208	27	T	C	C	TT	CC	CC	CC	CC	CC	CC	TT	TC	CC	0	3	3	100	0	2	2	100	0	4	4	100	0	2	2	100
A208	55	G	T	T	GG	TT	TT	TT	TT	TT	TT	GG	GT	TT	0	3	3	100	0	2	2	100	0	4	4	100	0	2	2	100
A208	114	A	G	G	AA	GG	GG	GG	GG	GG	GG	AA	AG	GG	0	3	3	100	0	2	2	100	0	4	4	100	0	2	2	100
A208	115	A	G	G	AA	GG	GG	GG	GG	GG	GG	AA	AG	GG	0	3	3	100	0	2	2	100	0	4	4	100	0	2	2	100
A208	117	A	G	G	AA	GG	GG	GG	GG	GG	GG	AA	AG	GG	0	3	3	100	0	2	2	100	0	4	4	100	0	2	2	100
A208	118	A	G	G	AA	GG	GG	GG	GG	GG	GG	AA	AG	GG	0	3	3	100	0	2	2	100	0	4	4	100	0	2	2	100
A208	127	C	T	C	CC	CC	CC	TT	CC	CC	CC	CC	CT	TT	3	0	3	0	0	2	2	100	4	0	4	0	2	0	2	0
A212	20	T	C	C	TT	CC	CC	CC	CC	CC	CC	TT	TC	CC	0	3	3	100	0	2	2	100	0	4	4	100	0	2	2	100
A212	28	T	C	C	TT	CC	CC	CC	CC	CC	CC	TT	TC	CC	0	3	3	100	0	2	2	100	0	4	4	100	0	2	2	100
A212	31	T	C	C	TT	CC	CC	CC	CC	CC	CC	TT	TC	CC	0	3	3	100	0	2	2	100	0	4	4	100	0	2	2	100
A214	89	C	T	T	CC	TT	TT	TT		TT	TT	CC	CT	TT	0	3	3	100	0	2	2	100	0	2	2	100	0	2	2	100
A214	98	A	G	G	AA	GG	GG	GG		GG	GG	AA	AG	GG	0	3	3	100	0	2	2	100	0	2	2	100	0	2	2	100
A215	26	T	C	C	TT	CC	CC	CC		CC	CC	TT	TC	CC	0	3	3	100	0	2	2	100	0	2	2	100	0	2	2	100
A215	124	A	G	A	AA	AA	AA	AG		AA	AA	AA	AG	GG	3	0	3	0	1	1	2	50	2	0	2	0	2	0	2	0
A216	48	C	T	T	CC	TT	TT	TT		CC	CC	CC	CT	TT	0	3	3	100	0	2	2	100	2	0	2	0	2	0	2	0
A216	49	A	G	G	AA	GG	GG	GG		GG	AA	AA	AG	GG	0	3	3	100	0	2	2	100	0	2	2	100	2	0	2	0
A216	96	C	T	T	CC	TT	TT	TT		TT	TT	CC	CT	TT	0	3	3	100	0	2	2	100	0	2	2	100	0	2	2	100
A216	100	G	A	A	GG	AA	AA	AA		AA	AA	GG	GA	AA	0	3	3	100	0	2	2	100	0	2	2	100	0	2	2	100
A216	105	C	T	C	CC	CC	CC	CC		CT	CC	CC	CT	TT	3	0	3	0	2	0	2	0	1	1	2	50	2	0	2	0
A216	118	C	G	G	CC	GG	GG	GG		GG	GG	CC	CG	GG	0	3	3	100	0	2	2	100	0	2	2	100	0	2	2	100
A216	122	A	G	G	AA	GG	GG	GG		GG	GG	AA	AG	GG	0	3	3	100	0	2	2	100	0	2	2	100	0	2	2	100
A217	69	A	G	G	AA	GG	GG	GG		GG	GG	AA	AG	GG	0	3	3	100	0	2	2	100	0	2	2	100	0	2	2	100
A217	79	T	C	T	TT	TT	TT	TT		TT	TC	TT	TC	CC	3	0	3	0	2	0	2	0	2	0	2	0	1	1	2	50
A219	60	C	A	A	CC	AA	CA	CC		CC	CC	CC	CA	AA	1	2	3	66.6667	2	0	2	0	2	0	2	0	2	0	2	0
A219	65	G	T	G	GG	GG	GG	GG		TT	TT	GG	GT	TT	3	0	3	0	2	0	2	0	0	2	2	100	0	2	2	100
A220	49	C	G	G	CC	GG	GG	GG		GG	GG	CC	CG	GG	0	3	3	100	0	2	2	100	0	2	2	100	0	2	2	100
A220	51	T	G	G	TT	GG	GG	GG		GG	GG	TT	TG	GG	0	3	3	100	0	2	2	100	0	2	2	100	0	2	2	100
A220	58	C	T	T	CC	TT	TT	TT		TT	TT	CC	CT	TT	0	3	3	100	0	2	2	100	0	2	2	100	0	2	2	100
A220	91	C	T	T	CC	TT	TT	CC		TT	TT	CC	CT	TT	0	3	3	100	2	0	2	0	0	2	2	100	0	2	2	100
A220	92	G	A	A	GG	AA	AA	AA		AA	AA	GG	GA	AA	0	3	3	100	0	2	2	100	0	2	2	100	0	2	2	100
A220	105	A	G	G	AA	GG	GG	GG		GG	GG	AA	AG	GG	0	3	3	100	0	2	2	100	0	2	2	100	0	2	2	100
A220	107	A	G	G	AA	GG	GG	GG		GG	GG	AA	AG	GG	0	3	3	100	0	2	2	100	0	2	2	100	0	2	2	100
A220	109	T	C	C	TT	CC	CC	CC		CC	CC	TT	TC	CC	0	3	3	100	0	2	2	100	0	2	2	100	0	2	2	100
A220	117	A	G	G	AA	GG	GG	GG		GG	GG	AA	AG	GG	0	3	3	100	0	2	2	100	0	2	2	100	0	2	2	100
A222	82	G	A	A	GG	AA	AA	GG		GG	GG	GG	GA	AA	0	3	3	100	2	0	2	0	2	0	2	0	2	0	2	0
A222	100	A	C	C	AA	CC	CC	CC		CC	CC	AA	AC	CC	0	3	3	100	0	2	2	100	0	2	2	100	0	2	2	100
A222	101	G	T	G	GG	GG	GG	GT		GG	GG	GG	GT	TT	3	0	3	0	1	1	2	50	2	0	2	0	2	0	2	0
A222	102	C	T	T	CC	TT	TT	CC		CC	CC	CC	CT	TT	0	3	3	100	2	0	2	0	2	0	2	0	2	0	2	0
A222	103	T	G	G	TT	GG	GG	GG		GG	GG	TT	TG	GG	0	3	3	100	0	2	2	100	0	2	2	100	0	2	2	100
A223	20	T	C	T	TT	TT	TT	TC		TT	TT	TT	TC	CC	3	0	3	0	1	1	2	50	2	0	2	0	2	0	2	0
A223	30	C	A	C	CC	CC	CC	CA		CC	CC	CC	CA	AA	3	0	3	0	1	1	2	50	2	0	2	0	2	0	2	0
A223	58	G	C	G	GG	GG	GG	GC		GG	GG	GG	GC	CC	3	0	3	0	1	1	2	50	2	0	2	0	2	0	2	0
A223	67	C	A	A	CC	AA	AA	AA		AA	AA	CC	CA	AA	0	3	3	100	0	2	2	100	0	2	2	100	0	2	2	100
A223	80	A	T	T	AA	TT	TT	TT		TT	TT	AA	AT	TT	0	3	3	100	0	2	2	100	0	2	2	100	0	2	2	100
A223	88	T	C	C	TT	CC	CC	CC		CC	CC	TT	TC	CC	0	3	3	100	0	2	2	100	0	2	2	100	0	2	2	100
A223	99	G	A	G	GG	GG	GG	GG		GA	GG	GG	GA	AA	3	0	3	0	2	0	2	0	1	1	2	50	2	0	2	0
A224	151	G	A	G	GG	GG	GG	AA		GG	GG	GG	GA	AA	3	0	3	0	0	2	2	100	2	0	2	0	2	0	2	0
A225	55	C	G	G	CC	GG	GG	GG		GG	GG	CC	CG	GG	0	3	3	100	0	2	2	100	0	2	2	100	0	2	2	100
A225	73	G	A	G	GG	GG	GG	GG		AA	GG	GG	GA	AA	3	0	3	0	2	0	2	0	0	2	2	100	2	0	2	0
A225	93	A	G	G	AA	GG	GG	GG		GG	GG	AA	AG	GG	0	3	3	100	0	2	2	100	0	2	2	100	0	2	2	100
A225	102	A	G	G	AA	GG	GG	GG		GG	GG	AA	AG	GG	0	3	3	100	0	2	2	100	0	2	2	100	0	2	2	100
A225	109	A	G	G	AA	GG	GG	GG		GG	GG	AA	AG	GG	0	3	3	100	0	2	2	100	0	2	2	100	0	2	2	100
A225	112	A	G	G	AA	GG	GG	GG		GG	GG	AA	AG	GG	0	3	3	100	0	2	2	100	0	2	2	100	0	2	2	100
A227	37	C	T	T	CC	TT	TT	TT		TT	TT	CC	CT	TT	0	3	3	100	0	2	2	100	0	2	2	100	0	2	2	100
A227	119	G	A	G	GG	GG	GG	GG		AA	AA	GG	GA	AA	3	0	3	0	2	0	2	0	0	2	2	100	0	2	2	100
A229	84	A	G	G	AA	GG	GG	GG		GG	GG	AA	AG	GG	0	3	3	100	0	2	2	100	0	2	2	100	0	2	2	100
A229	136	A	G	A	AA	AA	AA	AG		GG	AG	AA	AG	GG	3	0	3	0	1	1	2	50	0	2	2	100	1	1	2	50
A229	138	G	T	T	GG	TT	TT	TT		TT	TT	GG	GT	TT	0	3	3	100	0	2	2	100	0	2	2	100	0	2	2	100
A232	40	T	C	C	TT	CC	CC	CC		CC	CC	TT	TC	CC	0	3	3	100	0	2	2	100	0	2	2	100	0	2	2	100
A232	41	G	A	G	GG	GG	GG	GG		GA	GG	GG	GA	AA	3	0	3	0	2	0	2	0	1	1	2	50	2	0	2	0
A232	120	A	G	G	AA	GG	GG	GG		GG	GG	AA	AG	GG	0	3	3	100	0	2	2	100	0	2	2	100	0	2	2	100
A232	123	C	A	C	CC	CC	CC	CA		CC	CC	CC	CA	AA	3	0	3	0	1	1	2	50	2	0	2	0	2	0	2	0
A232	131	G	A	A	GG	AA	AA	AA		AA	AA	GG	GA	AA	0	3	3	100	0	2	2	100	0	2	2	100	0	2	2	100
A233	52	C	T	T	CC	TT	TT	CC		CC	CC	CC	CT	TT	0	3	3	100	2	0	2	0	2	0	2	0	2	0	2	0
A233	72	G	C	G	GG	GG	GG	GG		CC	GC	GG	GC	CC	3	0	3	0	2	0	2	0	0	2	2	100	1	1	2	50
A233	77	C	T	T	CC	TT	TT	TT		CC	CT	CC	CT	TT	0	3	3	100	0	2	2	100	2	0	2	0	1	1	2	50
A233	80	T	C	C	TT	CC	CC	CC		CC	CC	TT	TC	CC	0	3	3	100	0	2	2	100	0	2	2	100	0	2	2	100
A233	81	G	A	A	GG	AA	AA	AA		AA	AA	GG	GA	AA	0	3	3	100	0	2	2	100	0	2	2	100	0	2	2	100
A233	82	G	A	G	GG	GG	GG	GG		AA	GA	GG	GA	AA	3	0	3	0	2	0	2	0	0	2	2	100	1	1	2	50
A234	92	G	A	G	GG	GG	GG	GA		GG	GG	GG	GA	AA	3	0	3	0	1	1	2	50	2	0	2	0	2	0	2	0
A234	116	A	G	G	AA	GG	GG	GG		GG	GG	AA	AG	GG	0	3	3	100	0	2	2	100	0	2	2	100	0	2	2	100
A234	141	A	G	G	AA	GG	GG	GG		GG	GG	AA	AG	GG	0	3	3	100	0	2	2	100	0	2	2	100	0	2	2	100
A235	44	A	G	G	AA	GG	GG	GG		GG	GG	AA	AG	GG	0	3	3	100	0	2	2	100	0	2	2	100	0	2	2	100
A235	46	C	T	T	CC	TT	TT	CC		CC	CC	CC	CT	TT	0	3	3	100	2	0	2	0	2	0	2	0	2	0	2	0
A235	49	A	G	G	AA	GG	GG	GG		GG	GG	AA	AG	GG	0	3	3	100	0	2	2	100	0	2	2	100	0	2	2	100
A235	62	T	C	C	TT	CC	CC	CC		CC	CC	TT	TC	CC	0	3	3	100	0	2	2	100	0	2	2	100	0	2	2	100
A235	65	A	G	G	AA	GG	GG	GG		GG	GG	AA	AG	GG	0	3	3	100	0	2	2	100	0	2	2	100	0	2	2	100
A235	91	A	G	G	AA	GG	GG	GG		GG	GG	AA	AG	GG	0	3	3	100	0	2	2	100	0	2	2	100	0	2	2	100
A236	22	T	C	C	TT	CC	CC	CC		CC	CC	TT	TC	CC	0	3	3	100	0	2	2	100	0	2	2	100	0	2	2	100
A236	29	T	C	C	TT	CC	CC	CC		CC	CC	TT	TC	CC	0	3	3	100	0	2	2	100	0	2	2	100	0	2	2	100
A236	50	T	A	T	TT	TT	TT	TT		TT	TA	TT	TA	AA	3	0	3	0	2	0	2	0	2	0	2	0	1	1	2	50
A236	63	A	C	C	AA	CC	AA	AA		AA	AA	AA	AC	CC	2	1	3	33.3333	2	0	2	0	2	0	2	0	2	0	2	0
A236	88	T	G	G	TT	GG	GG	GG		GG	GG	TT	TG	GG	0	3	3	100	0	2	2	100	0	2	2	100	0	2	2	100
A236	110	G	A	A	GG	AA	AA	AA		AA	AA	GG	GA	AA	0	3	3	100	0	2	2	100	0	2	2	100	0	2	2	100
A237	61	G	C	C	GG	CC	GG	GG		GG	GG	GG	GC	CC	2	1	3	33.3333	2	0	2	0	2	0	2	0	2	0	2	0
A237	67	C	T	C	CC	CC	CC	CC		CC	CT	CC	CT	TT	3	0	3	0	2	0	2	0	2	0	2	0	1	1	2	50
A237	118	T	C	C	TT	CC	CC	CC		CC	CC	TT	TC	CC	0	3	3	100	0	2	2	100	0	2	2	100	0	2	2	100
A237	137	T	G	G	TT	GG	GG	TT		TT	TT	TT	TG	GG	0	3	3	100	2	0	2	0	2	0	2	0	2	0	2	0
A237	144	A	G	G	AA	GG	GG	GG		GG	GG	AA	AG	GG	0	3	3	100	0	2	2	100	0	2	2	100	0	2	2	100
A238	123	A	G	G	AA	GG	GG	GG		GG	GG	AA	AG	GG	0	3	3	100	0	2	2	100	0	2	2	100	0	2	2	100
A238	127	A	G	G	AA	GG	GG	GG		GG	GG	AA	AG	GG	0	3	3	100	0	2	2	100	0	2	2	100	0	2	2	100
A239	39	T	C	T	TT	TT	TT	CC		TT	TT	TT	TC	CC	3	0	3	0	0	2	2	100	2	0	2	0	2	0	2	0
A239	42	A	C	A	AA	AA	AA	CC		AA	AA	AA	AC	CC	3	0	3	0	0	2	2	100	2	0	2	0	2	0	2	0
A239	44	T	A	A	TT	AA	AA	AA		AA	AA	TT	TA	AA	0	3	3	100	0	2	2	100	0	2	2	100	0	2	2	100
A239	49	C	T	C	CC	CC	CC	TT		CC	CC	CC	CT	TT	3	0	3	0	0	2	2	100	2	0	2	0	2	0	2	0
A239	65	T	A	A	TT	AA	AA	AA		AA	AA	TT	TA	AA	0	3	3	100	0	2	2	100	0	2	2	100	0	2	2	100
A239	95	T	G	G	TT	GG	GG	GG		GG	GG	TT	TG	GG	0	3	3	100	0	2	2	100	0	2	2	100	0	2	2	100
A239	130	A	G	G	AA	GG	GG	GG		GG	GG	AA	AG	GG	0	3	3	100	0	2	2	100	0	2	2	100	0	2	2	100
A239	137	A	G	G	AA	GG	GG	GG		GG	GG	AA	AG	GG	0	3	3	100	0	2	2	100	0	2	2	100	0	2	2	100
A241	92	C	T	T	CC	TT	TT	TT		TT	TT	CC	CT	TT	0	3	3	100	0	2	2	100	0	2	2	100	0	2	2	100
A241	106	G	T	T	GG	TT	TT	TT		TT	TT	GG	GT	TT	0	3	3	100	0	2	2	100	0	2	2	100	0	2	2	100
A241	118	T	A	A	TT	AA	AA	AA		AA	AA	TT	TA	AA	0	3	3	100	0	2	2	100	0	2	2	100	0	2	2	100
A243	93	A	C	A	AA	AA	AA	AA		CC	CC	AA	AC	CC	3	0	3	0	2	0	2	0	0	2	2	100	0	2	2	100
A243	117	C	T	T	CC	TT	TT	CC		CC	CC	CC	CT	TT	0	3	3	100	2	0	2	0	2	0	2	0	2	0	2	0
A244	33	T	C	C	TT	CC	CC	CC		CC	CC	TT	TC	CC	0	3	3	100	0	2	2	100	0	2	2	100	0	2	2	100
A244	119	A	G	G	AA	GG	GG	GG		GG	GG	AA	AG	GG	0	3	3	100	0	2	2	100	0	2	2	100	0	2	2	100
A245	54	A	G	G	AA	GG	GG	GG		GG	GG	AA	AG	GG	0	3	3	100	0	2	2	100	0	2	2	100	0	2	2	100
A245	61	G	T	T	GG	TT	TT	TT		GG	GG	GG	GT	TT	0	3	3	100	0	2	2	100	2	0	2	0	2	0	2	0
A245	62	A	G	G	AA	GG	GG	GG		GG	GG	AA	AG	GG	0	3	3	100	0	2	2	100	0	2	2	100	0	2	2	100
A245	114	T	G	G	TT	GG	GG	GG		GG	GG	TT	TG	GG	0	3	3	100	0	2	2	100	0	2	2	100	0	2	2	100
A245	115	G	A	A	GG	AA	AA	AA		GG	GG	GG	GA	AA	0	3	3	100	0	2	2	100	2	0	2	0	2	0	2	0
A245	127	A	G	G	AA	GG	GG	GG		GG	GG	AA	AG	GG	0	3	3	100	0	2	2	100	0	2	2	100	0	2	2	100
A245	153	A	C	C	AA	CC	CC	CC		CC	CC	AA	AC	CC	0	3	3	100	0	2	2	100	0	2	2	100	0	2	2	100
A246	80	C	T	T	CC	TT	TT	TT		TT	TT	CC	CT	TT	0	3	3	100	0	2	2	100	0	2	2	100	0	2	2	100
A246	104	C	T	T	CC	TT	TT	TT		TT	TT	CC	CT	TT	0	3	3	100	0	2	2	100	0	2	2	100	0	2	2	100
A246	109	G	A	G	GG	GG	GG	GG		GA	GG	GG	GA	AA	3	0	3	0	2	0	2	0	1	1	2	50	2	0	2	0
A246	112	C	G	G	CC	GG	GG	GG		GG	GG	CC	CG	GG	0	3	3	100	0	2	2	100	0	2	2	100	0	2	2	100
A247	58	A	G	G	AA	GG	GG	GG		GG	GG	AA	AG	GG	0	3	3	100	0	2	2	100	0	2	2	100	0	2	2	100
A249	83	T	C	C	TT	CC	TC	TT		TT	TT	TT	TC	CC	1	2	3	66.6667	2	0	2	0	2	0	2	0	2	0	2	0
A249	130	G	A	A	GG	AA	AA	AA		AA	AA	GG	GA	AA	0	3	3	100	0	2	2	100	0	2	2	100	0	2	2	100
A251	62	T	C	T	TT	TT	TT	TT		CC	TT	TT	TC	CC	3	0	3	0	2	0	2	0	0	2	2	100	2	0	2	0
A251	122	G	T	G	GG	GG	GT	GG		GG	GG	GG	GT	TT	2	1	3	33.3333	2	0	2	0	2	0	2	0	2	0	2	0
A251	149	T	C	C	TT	CC	CC	CC		CC	CC	TT	TC	CC	0	3	3	100	0	2	2	100	0	2	2	100	0	2	2	100
A252	117	G	A	G	GG	GG	GG	GG		GG	AA	GG	GA	AA	3	0	3	0	2	0	2	0	2	0	2	0	0	2	2	100
A252	130	T	C	C	TT	CC	CC	CC		CC	CC	TT	TC	CC	0	3	3	100	0	2	2	100	0	2	2	100	0	2	2	100
A252	136	G	C	C	GG	CC	CC	CC		CC	CC	GG	GC	CC	0	3	3	100	0	2	2	100	0	2	2	100	0	2	2	100
A252	139	A	G	G	AA	GG	GG	GG		GG	GG	AA	AG	GG	0	3	3	100	0	2	2	100	0	2	2	100	0	2	2	100
A254	133	A	G	G	AA	GG	GG	GG		GG	GG	AA	AG	GG	0	3	3	100	0	2	2	100	0	2	2	100	0	2	2	100
A254	135	A	G	G	AA	GG	GG	GG		GG	GG	AA	AG	GG	0	3	3	100	0	2	2	100	0	2	2	100	0	2	2	100
A254	137	T	G	G	TT	GG	GG	GG		GG	GG	TT	TG	GG	0	3	3	100	0	2	2	100	0	2	2	100	0	2	2	100
A254	138	A	G	G	AA	GG	GG	GG		GG	GG	AA	AG	GG	0	3	3	100	0	2	2	100	0	2	2	100	0	2	2	100
A255	67	G	A	G	GG	GG	GG	GG		AA	AA	GG	GA	AA	3	0	3	0	2	0	2	0	0	2	2	100	0	2	2	100
A255	96	T	C	C	TT	CC	CC	CC		CC	CC	TT	TC	CC	0	3	3	100	0	2	2	100	0	2	2	100	0	2	2	100
A255	146	A	G	G	AA	GG	GG	GG		GG	GG	AA	AG	GG	0	3	3	100	0	2	2	100	0	2	2	100	0	2	2	100
A257	48	T	C	C	TT	CC	CC	CC		CC	CC	TT	TC	CC	0	3	3	100	0	2	2	100	0	2	2	100	0	2	2	100
A257	107	C	T	T	CC	TT	TT	CC		CC	CC	CC	CT	TT	0	3	3	100	2	0	2	0	2	0	2	0	2	0	2	0
A258	60	T	C	C	TT	CC	CC	CC		TT	TT	TT	TC	CC	0	3	3	100	0	2	2	100	2	0	2	0	2	0	2	0
A258	82	T	C	C	TT	CC	CC	CC		CC	CC	TT	TC	CC	0	3	3	100	0	2	2	100	0	2	2	100	0	2	2	100
A258	87	T	C	C	TT	CC	CC	CC		CC	CC	TT	TC	CC	0	3	3	100	0	2	2	100	0	2	2	100	0	2	2	100
A258	97	G	A	G	GG	GG	GG	GG		AA	GG	GG	GA	AA	3	0	3	0	2	0	2	0	0	2	2	100	2	0	2	0
A258	117	C	T	T	CC	TT	TT	TT		CC	CC	CC	CT	TT	0	3	3	100	0	2	2	100	2	0	2	0	2	0	2	0
A258	121	C	T	C	CC	CC	CC	CC		TT	CC	CC	CT	TT	3	0	3	0	2	0	2	0	0	2	2	100	2	0	2	0
A258	130	G	A	A	GG	AA	AA	AA		AA	AA	GG	GA	AA	0	3	3	100	0	2	2	100	0	2	2	100	0	2	2	100
A259	90	C	G	C	CC	CC	CC	CC		GG	CC	CC	CG	GG	3	0	3	0	2	0	2	0	0	2	2	100	2	0	2	0
A259	111	T	C	C	TT	CC	CC	CC		CC	CC	TT	TC	CC	0	3	3	100	0	2	2	100	0	2	2	100	0	2	2	100
A259	124	C	T	T	CC	TT	TT	CC		CC	CC	CC	CT	TT	0	3	3	100	2	0	2	0	2	0	2	0	2	0	2	0
A259	127	T	C	C	TT	CC	CC	CC		CC	CC	TT	TC	CC	0	3	3	100	0	2	2	100	0	2	2	100	0	2	2	100
A259	148	C	A	A	CC	AA	AA	AA		AA	AA	CC	CA	AA	0	3	3	100	0	2	2	100	0	2	2	100	0	2	2	100
A262	29	T	C	C	TT	CC	CC	CC		CC	CC	TT	TC	CC	0	3	3	100	0	2	2	100	0	2	2	100	0	2	2	100
A262	39	C	T	T	CC	TT	TT	CC		CC	CC	CC	CT	TT	0	3	3	100	2	0	2	0	2	0	2	0	2	0	2	0
A262	138	C	T	T	CC	TT	TT	TT		TT	TT	CC	CT	TT	0	3	3	100	0	2	2	100	0	2	2	100	0	2	2	100
A264	100	T	C	C	TT	CC	CC	CC		CC	CC	TT	TC	CC	0	3	3	100	0	2	2	100	0	2	2	100	0	2	2	100
A264	105	T	G	G	TT	GG	GG	GG		GG	GG	TT	TG	GG	0	3	3	100	0	2	2	100	0	2	2	100	0	2	2	100
A265	64	G	T	T	GG	TT		TT		TT	TT	GG	GT	TT	0	1	1	100	0	2	2	100	0	2	2	100	0	2	2	100
A265	90	C	T	T	CC	TT		TT		TT	TT	CC	CT	TT	0	1	1	100	0	2	2	100	0	2	2	100	0	2	2	100
A265	129	C	A	A	CC	AA		AA		AA	AA	CC	CA	AA	0	1	1	100	0	2	2	100	0	2	2	100	0	2	2	100
A266	61	C	G	C	CC	CC	CC	CC		GG	GG	CC	CG	GG	3	0	3	0	2	0	2	0	0	2	2	100	0	2	2	100
A266	85	T	C	C	TT	CC	CC	CC		CC	CC	TT	TC	CC	0	3	3	100	0	2	2	100	0	2	2	100	0	2	2	100
A266	113	T	G	G	TT	GG	GG	GG		GG	GG	TT	TG	GG	0	3	3	100	0	2	2	100	0	2	2	100	0	2	2	100
A266	127	G	A	A	GG	AA	AA	AA		AA	AA	GG	GA	AA	0	3	3	100	0	2	2	100	0	2	2	100	0	2	2	100
A267	39	T	C	C	TT	CC	CC	TT		TT	TT	TT	TC	CC	0	3	3	100	2	0	2	0	2	0	2	0	2	0	2	0
A267	68	A	G	G	AA	GG	GG	AA		AA	AA	AA	AG	GG	0	3	3	100	2	0	2	0	2	0	2	0	2	0	2	0
A267	90	G	A	A	GG	AA	AA	AA		AA	AA	GG	GA	AA	0	3	3	100	0	2	2	100	0	2	2	100	0	2	2	100
A268	25	T	G	G	TT	GG	GG	TG		TT	TT	TT	TG	GG	0	3	3	100	1	1	2	50	2	0	2	0	2	0	2	0
A268	46	G	A	G	GG	GG	GG	GA		GG	GG	GG	GA	AA	3	0	3	0	1	1	2	50	2	0	2	0	2	0	2	0
A268	78	A	G	G	AA	GG	GG	AA		AA	GG	AA	AG	GG	0	3	3	100	2	0	2	0	2	0	2	0	0	2	2	100
A268	103	T	G	G	TT	GG	GG	TG		TT	TT	TT	TG	GG	0	3	3	100	1	1	2	50	2	0	2	0	2	0	2	0
A269	115	A	G	G	AA	GG	GG	GG		GG	GG	AA	AG	GG	0	3	3	100	0	2	2	100	0	2	2	100	0	2	2	100
A270	83	C	T	T	CC	TT	TT	CC		CC	TT	CC	CT	TT	0	3	3	100	2	0	2	0	2	0	2	0	0	2	2	100
A270	107	A	G	G	AA	GG	GG	GG		GG	GG	AA	AG	GG	0	3	3	100	0	2	2	100	0	2	2	100	0	2	2	100
A271	36	T	C	C	TT	CC	CC	CC		CC	CC	TT	TC	CC	0	3	3	100	0	2	2	100	0	2	2	100	0	2	2	100
A271	57	G	A	A	GG	AA	AA	AA		AA	AA	GG	GA	AA	0	3	3	100	0	2	2	100	0	2	2	100	0	2	2	100
A271	85	T	C	C	TT	CC	CC	CC		CC	CC	TT	TC	CC	0	3	3	100	0	2	2	100	0	2	2	100	0	2	2	100
A271	107	T	A	A	TT	AA	AA	AA		AA	AA	TT	TA	AA	0	3	3	100	0	2	2	100	0	2	2	100	0	2	2	100
A271	111	A	T	A	AA	AA	AA	AA		TT	TT	AA	AT	TT	3	0	3	0	2	0	2	0	0	2	2	100	0	2	2	100
A272	46	C	T	C	CC	CC	CC	TT		CC	CC	CC	CT	TT	3	0	3	0	0	2	2	100	2	0	2	0	2	0	2	0
A272	47	A	G	G	AA	GG	GG	GG		GG	GG	AA	AG	GG	0	3	3	100	0	2	2	100	0	2	2	100	0	2	2	100
A273	84	G	A	A	GG	AA	AA	AA		AA	AA	GG	GA	AA	0	3	3	100	0	2	2	100	0	2	2	100	0	2	2	100
A273	86	T	C	C	TT	CC	CC	CC		CC	CC	TT	TC	CC	0	3	3	100	0	2	2	100	0	2	2	100	0	2	2	100
A273	100	C	G	G	CC	GG	GG	GG		GG	GG	CC	CG	GG	0	3	3	100	0	2	2	100	0	2	2	100	0	2	2	100
A273	130	C	T	T	CC	TT	TT	TT		TT	TT	CC	CT	TT	0	3	3	100	0	2	2	100	0	2	2	100	0	2	2	100
A273	135	A	G	G	AA	GG	GG	GG		GG	GG	AA	AG	GG	0	3	3	100	0	2	2	100	0	2	2	100	0	2	2	100
A277	83	G	T	T	GG	TT	GG	GG		GG	GG	GG	GT	TT	2	1	3	33.3333	2	0	2	0	2	0	2	0	2	0	2	0
A277	94	T	C	C	TT	CC	CC	CC		CC	CC	TT	TC	CC	0	3	3	100	0	2	2	100	0	2	2	100	0	2	2	100
A277	116	A	G	G	AA	GG	GG	GG		GG	GG	AA	AG	GG	0	3	3	100	0	2	2	100	0	2	2	100	0	2	2	100
A277	127	G	A	G	GG	GG	GG	GG		GG	GA	GG	GA	AA	3	0	3	0	2	0	2	0	2	0	2	0	1	1	2	50
A277	128	G	T	G	GG	GG	GG	GG		TT	GG	GG	GT	TT	3	0	3	0	2	0	2	0	0	2	2	100	2	0	2	0
A277	150	A	G	G	AA	GG	GG	GG		GG	GG	AA	AG	GG	0	3	3	100	0	2	2	100	0	2	2	100	0	2	2	100
A278	52	T	C	C	TT	CC	CC	CC		CC	CC	TT	TC	CC	0	3	3	100	0	2	2	100	0	2	2	100	0	2	2	100
A278	53	T	A	A	TT	AA	AA	AA		AA	AA	TT	TA	AA	0	3	3	100	0	2	2	100	0	2	2	100	0	2	2	100
A278	74	C	A	A	CC	AA	AA	AA		AA	AA	CC	CA	AA	0	3	3	100	0	2	2	100	0	2	2	100	0	2	2	100
A278	79	A	G	G	AA	GG	GG	GG		GG	GG	AA	AG	GG	0	3	3	100	0	2	2	100	0	2	2	100	0	2	2	100
A278	102	A	T	T	AA	TT	TT	AT		AA	AA	AA	AT	TT	0	3	3	100	1	1	2	50	2	0	2	0	2	0	2	0
A279	26	T	C	C	TT	CC	CC	CC		CC	CC	TT	TC	CC	0	3	3	100	0	2	2	100	0	2	2	100	0	2	2	100
A279	65	T	C	C	TT	CC	CC	CC		CC	CC	TT	TC	CC	0	3	3	100	0	2	2	100	0	2	2	100	0	2	2	100
A279	107	T	C	C	TT	CC	CC	CC		CC	CC	TT	TC	CC	0	3	3	100	0	2	2	100	0	2	2	100	0	2	2	100
A279	111	A	C	C	AA	CC	CC	AA		AA	AA	AA	AC	CC	0	3	3	100	2	0	2	0	2	0	2	0	2	0	2	0
A280	42	A	G	G	AA	GG		GG		GG	GG	AA	AG	GG	0	1	1	100	0	2	2	100	0	2	2	100	0	2	2	100
A280	62	T	C	C	TT	CC		CC		CC	CC	TT	TC	CC	0	1	1	100	0	2	2	100	0	2	2	100	0	2	2	100
A280	63	T	C	C	TT	CC		CC		CC	CC	TT	TC	CC	0	1	1	100	0	2	2	100	0	2	2	100	0	2	2	100
A280	87	G	A	G	GG	GG		GG		AA	GG	GG	GA	AA	1	0	1	0	2	0	2	0	0	2	2	100	2	0	2	0
A280	117	T	C	T	TT	TT		TT		CC	TT	TT	TC	CC	1	0	1	0	2	0	2	0	0	2	2	100	2	0	2	0
A280	137	A	G	G	AA	GG		GG		GG	GG	AA	AG	GG	0	1	1	100	0	2	2	100	0	2	2	100	0	2	2	100
A282	45	T	C	C	TT	CC	CC	CC		CC	CC	TT	TC	CC	0	3	3	100	0	2	2	100	0	2	2	100	0	2	2	100
A282	64	G	A	A	GG	AA	AA	AA		AA	AA	GG	GA	AA	0	3	3	100	0	2	2	100	0	2	2	100	0	2	2	100
A282	79	C	T	C	CC	CC	CC	TT		CC	CC	CC	CT	TT	3	0	3	0	0	2	2	100	2	0	2	0	2	0	2	0
A282	115	G	A	G	GG	GG	GG	GG		AA	GG	GG	GA	AA	3	0	3	0	2	0	2	0	0	2	2	100	2	0	2	0
A282	126	A	G	G	AA	GG	GG	GG		GG	GG	AA	AG	GG	0	3	3	100	0	2	2	100	0	2	2	100	0	2	2	100
A283	22	T	C	C	TT	CC	CC	CC		CC	CC	TT	TC	CC	0	3	3	100	0	2	2	100	0	2	2	100	0	2	2	100
A283	96	C	T	C	CC	CC	CC	CT		CC	CC	CC	CT	TT	3	0	3	0	1	1	2	50	2	0	2	0	2	0	2	0
A283	99	T	C	C	TT	CC	CC	CC		CC	CC	TT	TC	CC	0	3	3	100	0	2	2	100	0	2	2	100	0	2	2	100
A286	36	T	C	C	TT	CC	CC	CC		CC	CC	TT	TC	CC	0	3	3	100	0	2	2	100	0	2	2	100	0	2	2	100
A286	61	C	T	C	CC	CC	CC	CC		CC	CT	CC	CT	TT	3	0	3	0	2	0	2	0	2	0	2	0	1	1	2	50
A286	122	A	T	T	AA	TT	TT	TT		TT	TT	AA	AT	TT	0	3	3	100	0	2	2	100	0	2	2	100	0	2	2	100
A286	123	T	C	C	TT	CC	CC	CC		CC	CC	TT	TC	CC	0	3	3	100	0	2	2	100	0	2	2	100	0	2	2	100
A286	126	A	G	G	AA	GG	GG	GG		GG	GG	AA	AG	GG	0	3	3	100	0	2	2	100	0	2	2	100	0	2	2	100
A286	127	A	T	T	AA	TT	TT	TT		TT	TT	AA	AT	TT	0	3	3	100	0	2	2	100	0	2	2	100	0	2	2	100
A286	128	A	G	G	AA	GG	GG	GG		GG	GG	AA	AG	GG	0	3	3	100	0	2	2	100	0	2	2	100	0	2	2	100
A286	129	C	G	G	CC	GG	GG	GG		GG	GG	CC	CG	GG	0	3	3	100	0	2	2	100	0	2	2	100	0	2	2	100
A286	136	T	G	G	TT	GG	GG	GG		GG	GG	TT	TG	GG	0	3	3	100	0	2	2	100	0	2	2	100	0	2	2	100
A286	138	C	T	T	CC	TT	TT	TT		TT	TT	CC	CT	TT	0	3	3	100	0	2	2	100	0	2	2	100	0	2	2	100
A286	140	C	T	T	CC	TT	TT	TT		TT	TT	CC	CT	TT	0	3	3	100	0	2	2	100	0	2	2	100	0	2	2	100
A286	141	G	T	T	GG	TT	TT	TT		TT	TT	GG	GT	TT	0	3	3	100	0	2	2	100	0	2	2	100	0	2	2	100
A289	51	T	C	C	TT	CC	CC	CC		CC	CC	TT	TC	CC	0	3	3	100	0	2	2	100	0	2	2	100	0	2	2	100
A291	72	A	G	G	AA	GG	GG	GG		GG	GG	AA	AG	GG	0	3	3	100	0	2	2	100	0	2	2	100	0	2	2	100
A291	160	C	T	T	CC	TT	TT	TT		TT	TT	CC	CT	TT	0	3	3	100	0	2	2	100	0	2	2	100	0	2	2	100
A294	62	T	C	C	TT	CC	CC	CC		CC	CC	TT	TC	CC	0	3	3	100	0	2	2	100	0	2	2	100	0	2	2	100
A294	141	A	G	G	AA	GG	GG	GG		GG	GG	AA	AG	GG	0	3	3	100	0	2	2	100	0	2	2	100	0	2	2	100
A299	28	C	T	T	CC	TT	CC	CC		CC	CC	CC	CT	TT	2	1	3	33.3333	2	0	2	0	2	0	2	0	2	0	2	0
A299	50	T	C	C	TT	CC	CC	CC		CC	CC	TT	TC	CC	0	3	3	100	0	2	2	100	0	2	2	100	0	2	2	100
A299	54	T	C	C	TT	CC	CC	CC		CC	CC	TT	TC	CC	0	3	3	100	0	2	2	100	0	2	2	100	0	2	2	100
A299	89	A	G	G	AA	GG	AA	AA		AA	AA	AA	AG	GG	2	1	3	33.3333	2	0	2	0	2	0	2	0	2	0	2	0
A300	42	T	C	C	TT	CC	CC	CC		CC	CC	TT	TC	CC	0	3	3	100	0	2	2	100	0	2	2	100	0	2	2	100
A300	60	T	C	T	TT	TT	TT	TC		TT	TT	TT	TC	CC	3	0	3	0	1	1	2	50	2	0	2	0	2	0	2	0
A300	65	G	C	C	GG	CC	CC	CC		CC	CC	GG	GC	CC	0	3	3	100	0	2	2	100	0	2	2	100	0	2	2	100
A300	90	A	G	G	AA	GG	GG	GG		GG	GG	AA	AG	GG	0	3	3	100	0	2	2	100	0	2	2	100	0	2	2	100
A300	107	A	G	G	AA	GG	GG	GG		GG	GG	AA	AG	GG	0	3	3	100	0	2	2	100	0	2	2	100	0	2	2	100
A301	34	T	C	C	TT	CC	CC	CC		CC	CC	TT	TC	CC	0	3	3	100	0	2	2	100	0	2	2	100	0	2	2	100
A301	42	T	C	C	TT	CC	CC	CC		CC	CC	TT	TC	CC	0	3	3	100	0	2	2	100	0	2	2	100	0	2	2	100
A301	86	A	G	G	AA	GG	GG	GG		GG	GG	AA	AG	GG	0	3	3	100	0	2	2	100	0	2	2	100	0	2	2	100
A301	89	A	G	G	AA	GG	GG	GG		GG	GG	AA	AG	GG	0	3	3	100	0	2	2	100	0	2	2	100	0	2	2	100
A302	63	C	T	T	CC	TT	TT	TT		TT	TT	CC	CT	TT	0	3	3	100	0	2	2	100	0	2	2	100	0	2	2	100
A302	83	T	G	G	TT	GG	GG	GG		GG	GG	TT	TG	GG	0	3	3	100	0	2	2	100	0	2	2	100	0	2	2	100
A302	118	T	C	C	TT	CC	CC	CC		CC	CC	TT	TC	CC	0	3	3	100	0	2	2	100	0	2	2	100	0	2	2	100
A302	125	A	G	G	AA	GG	GG	GG		GG	GG	AA	AG	GG	0	3	3	100	0	2	2	100	0	2	2	100	0	2	2	100
A304	42	A	G	G	AA	GG	GG	GG		GG	GG	AA	AG	GG	0	3	3	100	0	2	2	100	0	2	2	100	0	2	2	100
A304	56	A	G	A	AA	AA	AA	AA		GG	AA	AA	AG	GG	3	0	3	0	2	0	2	0	0	2	2	100	2	0	2	0
A304	121	G	A	G	GG	GG	GG	GG		GA	GG	GG	GA	AA	3	0	3	0	2	0	2	0	1	1	2	50	2	0	2	0
A304	127	A	G	G	AA	GG	GG	GG		GG	GG	AA	AG	GG	0	3	3	100	0	2	2	100	0	2	2	100	0	2	2	100
A304	131	C	T	T	CC	TT	TT	TT		TT	TT	CC	CT	TT	0	3	3	100	0	2	2	100	0	2	2	100	0	2	2	100
A304	132	A	G	G	AA	GG	GG	GG		GG	GG	AA	AG	GG	0	3	3	100	0	2	2	100	0	2	2	100	0	2	2	100
A305	47	T	C	C	TT	CC	CC	CC		CC	CC	TT	TC	CC	0	3	3	100	0	2	2	100	0	2	2	100	0	2	2	100
A305	60	T	C	C	TT	CC	CC	CC		CC	CC	TT	TC	CC	0	3	3	100	0	2	2	100	0	2	2	100	0	2	2	100
A305	113	A	C	C	AA	CC	CC	AA		AA	AA	AA	AC	CC	0	3	3	100	2	0	2	0	2	0	2	0	2	0	2	0
A306	55	T	C	C	TT	CC	CC	CC		CC	CC	TT	TC	CC	0	3	3	100	0	2	2	100	0	2	2	100	0	2	2	100
A306	72	G	A	A	GG	AA	AA	GG		AA	AA	GG	GA	AA	0	3	3	100	2	0	2	0	0	2	2	100	0	2	2	100
A306	86	C	T	C	CC	CC	CC	CC		CC	TT	CC	CT	TT	3	0	3	0	2	0	2	0	2	0	2	0	0	2	2	100
A306	87	G	A	G	GG	GG	GG	GG		AA	GG	GG	GA	AA	3	0	3	0	2	0	2	0	0	2	2	100	2	0	2	0
A306	107	A	G	G	AA	GG	GG	GG		GG	GG	AA	AG	GG	0	3	3	100	0	2	2	100	0	2	2	100	0	2	2	100
A306	135	A	G	G	AA	GG	GG	GG		GG	GG	AA	AG	GG	0	3	3	100	0	2	2	100	0	2	2	100	0	2	2	100
A306	136	A	G	G	AA	GG	GG	GG		GG	GG	AA	AG	GG	0	3	3	100	0	2	2	100	0	2	2	100	0	2	2	100
A309	15	A	T	T	AA	TT	TT	TT		TT	TT	AA	AT	TT	0	3	3	100	0	2	2	100	0	2	2	100	0	2	2	100
A309	26	C	A	A	CC	AA	AA	AA		AA	AA	CC	CA	AA	0	3	3	100	0	2	2	100	0	2	2	100	0	2	2	100
A309	31	G	A	G	GG	GG	GG	GG		GG	AA	GG	GA	AA	3	0	3	0	2	0	2	0	2	0	2	0	0	2	2	100
A309	55	A	G	G	AA	GG	GG	GG		GG	GG	AA	AG	GG	0	3	3	100	0	2	2	100	0	2	2	100	0	2	2	100
A309	63	T	C	C	TT	CC	CC	CC		CC	CC	TT	TC	CC	0	3	3	100	0	2	2	100	0	2	2	100	0	2	2	100
A309	65	G	T	G	GG	GG	GG	TT		GG	GG	GG	GT	TT	3	0	3	0	0	2	2	100	2	0	2	0	2	0	2	0
A309	97	A	G	G	AA	GG	GG	GG		GG	GG	AA	AG	GG	0	3	3	100	0	2	2	100	0	2	2	100	0	2	2	100
A309	106	A	G	G	AA	GG	GG	GG		GG	GG	AA	AG	GG	0	3	3	100	0	2	2	100	0	2	2	100	0	2	2	100
A309	112	C	T	T	CC	TT	TT	TT		TT	TT	CC	CT	TT	0	3	3	100	0	2	2	100	0	2	2	100	0	2	2	100
A309	116	T	A	A	TT	AA	AA	AA		AA	AA	TT	TA	AA	0	3	3	100	0	2	2	100	0	2	2	100	0	2	2	100
A309	122	G	T	T	GG	TT	TT	TT		TT	TT	GG	GT	TT	0	3	3	100	0	2	2	100	0	2	2	100	0	2	2	100
A311	21	T	C	C	TT	CC	CC	CC		CC	CC	TT	TC	CC	0	3	3	100	0	2	2	100	0	2	2	100	0	2	2	100
A311	31	T	C	C	TT	CC	CC	CC		CC	CC	TT	TC	CC	0	3	3	100	0	2	2	100	0	2	2	100	0	2	2	100
A312	32	A	G	G	AA	GG	GG	AA		AA	AA	AA	AG	GG	0	3	3	100	2	0	2	0	2	0	2	0	2	0	2	0
A312	51	C	T	C	CC	CC	CC	CT		CC	CC	CC	CT	TT	3	0	3	0	1	1	2	50	2	0	2	0	2	0	2	0
A312	136	G	A	G	GG	GG	GG	GG		AA	GG	GG	GA	AA	3	0	3	0	2	0	2	0	0	2	2	100	2	0	2	0
A313	65	A	G	G	AA	GG	GG	AA		AA	AA	AA	AG	GG	0	3	3	100	2	0	2	0	2	0	2	0	2	0	2	0
A313	66	T	C	C	TT	CC	CC	CC		CC	CC	TT	TC	CC	0	3	3	100	0	2	2	100	0	2	2	100	0	2	2	100
A314	29	T	C	C	TT	CC	CC	CC		CC	CC	TT	TC	CC	0	3	3	100	0	2	2	100	0	2	2	100	0	2	2	100
A314	99	C	T	T	CC	TT	TT	TT		TT	TT	CC	CT	TT	0	3	3	100	0	2	2	100	0	2	2	100	0	2	2	100
A314	108	C	G	C	CC	CC	CC	GG		CC	CC	CC	CG	GG	3	0	3	0	0	2	2	100	2	0	2	0	2	0	2	0
A315	66	C	T	T	CC	TT	CC	CC		CC	TT	CC	CT	TT	2	1	3	33.3333	2	0	2	0	2	0	2	0	0	2	2	100
A315	81	G	A	A	GG	AA	AA	AA		AA	AA	GG	GA	AA	0	3	3	100	0	2	2	100	0	2	2	100	0	2	2	100
A315	101	T	C	T	TT	TT	TT	TT		CC	TT	TT	TC	CC	3	0	3	0	2	0	2	0	0	2	2	100	2	0	2	0
A315	147	T	C	C	TT	CC	TT	TT		TT	TT	TT	TC	CC	2	1	3	33.3333	2	0	2	0	2	0	2	0	2	0	2	0
A315	148	A	G	G	AA	GG	GG	GG		GG	GG	AA	AG	GG	0	3	3	100	0	2	2	100	0	2	2	100	0	2	2	100
A315	164	T	C	C	TT	CC	CC	CC		CC	CC	TT	TC	CC	0	3	3	100	0	2	2	100	0	2	2	100	0	2	2	100
A317	62	G	A	A	GG	AA	AA	AA		AA	AA	GG	GA	AA	0	3	3	100	0	2	2	100	0	2	2	100	0	2	2	100
A317	91	G	C	C	GG	CC	CC	CC		CC	CC	GG	GC	CC	0	3	3	100	0	2	2	100	0	2	2	100	0	2	2	100
A317	95	G	C	C	GG	CC	CC	CC		CC	CC	GG	GC	CC	0	3	3	100	0	2	2	100	0	2	2	100	0	2	2	100
A319	53	G	A	A	GG	AA		AA		AA	AA	GG	GA	AA	0	1	1	100	0	2	2	100	0	2	2	100	0	2	2	100
A319	120	T	A	A	TT	AA		AA		AA	AA	TT	TA	AA	0	1	1	100	0	2	2	100	0	2	2	100	0	2	2	100
A320	26	T	C	C	TT	CC	CC	CC		CC	CC	TT	TC	CC	0	3	3	100	0	2	2	100	0	2	2	100	0	2	2	100
A320	88	G	A	G	GG	GG	GG	AA		GG	GG	GG	GA	AA	3	0	3	0	0	2	2	100	2	0	2	0	2	0	2	0
A320	117	A	G	G	AA	GG	GG	GG		GG	GG	AA	AG	GG	0	3	3	100	0	2	2	100	0	2	2	100	0	2	2	100
A321	38	T	C	C	TT	CC	CC	CC		CC	CC	TT	TC	CC	0	3	3	100	0	2	2	100	0	2	2	100	0	2	2	100
A321	66	C	A	A	CC	AA	AA	CC		CC	CC	CC	CA	AA	0	3	3	100	2	0	2	0	2	0	2	0	2	0	2	0
A321	123	T	C	C	TT	CC	CC	CC		CC	CC	TT	TC	CC	0	3	3	100	0	2	2	100	0	2	2	100	0	2	2	100
A321	124	G	A	A	GG	AA	AA	AA		AA	AA	GG	GA	AA	0	3	3	100	0	2	2	100	0	2	2	100	0	2	2	100
A321	126	G	C	G	GG	GG	GG	GC		GG	GG	GG	GC	CC	3	0	3	0	1	1	2	50	2	0	2	0	2	0	2	0
A321	129	T	G	G	TT	GG	GG	GG		GG	GG	TT	TG	GG	0	3	3	100	0	2	2	100	0	2	2	100	0	2	2	100
A324	73	C	T	T	CC	TT	TT	TT		TT	TT	CC	CT	TT	0	3	3	100	0	2	2	100	0	2	2	100	0	2	2	100
A324	101	G	T	G	GG	GG	GG	GG		TT	GG	GG	GT	TT	3	0	3	0	2	0	2	0	0	2	2	100	2	0	2	0
A326	42	T	C	C	TT	CC	CC	CC		CC	CC	TT	TC	CC	0	3	3	100	0	2	2	100	0	2	2	100	0	2	2	100
A326	47	T	C	C	TT	CC	CC	CC		CC	CC	TT	TC	CC	0	3	3	100	0	2	2	100	0	2	2	100	0	2	2	100
A326	75	T	C	C	TT	CC	CC	CC		CC	CC	TT	TC	CC	0	3	3	100	0	2	2	100	0	2	2	100	0	2	2	100
A326	79	T	A	T	TT	TT	TT	TT		TA	TT	TT	TA	AA	3	0	3	0	2	0	2	0	1	1	2	50	2	0	2	0
A326	97	A	G	G	AA	GG	GG	GG		GG	GG	AA	AG	GG	0	3	3	100	0	2	2	100	0	2	2	100	0	2	2	100
A326	109	T	C	C	TT	CC	CC	CC		CC	CC	TT	TC	CC	0	3	3	100	0	2	2	100	0	2	2	100	0	2	2	100
A326	122	G	A	A	GG	AA	AA	AA		AA	AA	GG	GA	AA	0	3	3	100	0	2	2	100	0	2	2	100	0	2	2	100
A326	123	C	T	C	CC	CC	CC	CC		CC	TT	CC	CT	TT	3	0	3	0	2	0	2	0	2	0	2	0	0	2	2	100
A328	55	C	T	T	CC	TT	TT	TT		TT	TT	CC	CT	TT	0	3	3	100	0	2	2	100	0	2	2	100	0	2	2	100
A328	94	C	T	T	CC	TT	TT	TT		TT	TT	CC	CT	TT	0	3	3	100	0	2	2	100	0	2	2	100	0	2	2	100
A328	95	A	G	G	AA	GG	GG	GG		GG	GG	AA	AG	GG	0	3	3	100	0	2	2	100	0	2	2	100	0	2	2	100
A328	103	A	G	G	AA	GG	GG	GG		GG	GG	AA	AG	GG	0	3	3	100	0	2	2	100	0	2	2	100	0	2	2	100
A328	108	G	A	A	GG	AA	AA	AA		AA	AA	GG	GA	AA	0	3	3	100	0	2	2	100	0	2	2	100	0	2	2	100
A330	43	T	C	C	TT	CC	CC	CC		CC	CC	TT	TC	CC	0	3	3	100	0	2	2	100	0	2	2	100	0	2	2	100
A330	56	G	A	G	GG	GG	GG	GG		AA	GG	GG	GA	AA	3	0	3	0	2	0	2	0	0	2	2	100	2	0	2	0
A330	63	T	A	T	TT	TT	TT	TT		AA	TT	TT	TA	AA	3	0	3	0	2	0	2	0	0	2	2	100	2	0	2	0
A330	73	G	A	G	GG	GG	GG	AA		GG	GG	GG	GA	AA	3	0	3	0	0	2	2	100	2	0	2	0	2	0	2	0
A331	135	T	C	C	TT	CC	CC	CC		CC	CC	TT	TC	CC	0	3	3	100	0	2	2	100	0	2	2	100	0	2	2	100
A331	143	C	T	C	CC	CC	CC	CC		TT	CC	CC	CT	TT	3	0	3	0	2	0	2	0	0	2	2	100	2	0	2	0
A332	46	T	C	C	TT	CC	CC	CC		CC	CC	TT	TC	CC	0	3	3	100	0	2	2	100	0	2	2	100	0	2	2	100
A332	129	T	C	C	TT	CC	CC	CC		CC	CC	TT	TC	CC	0	3	3	100	0	2	2	100	0	2	2	100	0	2	2	100
A333	29	T	C	T	TT	TT	TT	TT		TT	CC	TT	TC	CC	3	0	3	0	2	0	2	0	2	0	2	0	0	2	2	100
A333	84	T	C	T	TT	TT	CC	TT		TT	TT	TT	TC	CC	1	2	3	66.6667	2	0	2	0	2	0	2	0	2	0	2	0
A333	96	A	G	G	AA	GG	GG	GG		GG	GG	AA	AG	GG	0	3	3	100	0	2	2	100	0	2	2	100	0	2	2	100
A333	118	G	A	A	GG	AA	AA	AA		AA	AA	GG	GA	AA	0	3	3	100	0	2	2	100	0	2	2	100	0	2	2	100
A334	58	A	G	G	AA	GG	GG	GG		GG	GG	AA	AG	GG	0	3	3	100	0	2	2	100	0	2	2	100	0	2	2	100
A334	129	G	A	A	GG	AA	AA	AA		GG	GG	GG	GA	AA	0	3	3	100	0	2	2	100	2	0	2	0	2	0	2	0
A335	32	T	C	C	TT	CC	CC	CC		CC	CC	TT	TC	CC	0	3	3	100	0	2	2	100	0	2	2	100	0	2	2	100
A335	73	G	A	A	GG	AA	AA	AA		AA	AA	GG	GA	AA	0	3	3	100	0	2	2	100	0	2	2	100	0	2	2	100
A336	65	C	T	C	CC	CC		CC		CC	TT	CC	CT	TT	1	0	1	0	2	0	2	0	2	0	2	0	0	2	2	100
A336	76	A	G	G	AA	GG		GG		GG	GG	AA	AG	GG	0	1	1	100	0	2	2	100	0	2	2	100	0	2	2	100
A336	80	A	G	G	AA	GG		GG		GG	GG	AA	AG	GG	0	1	1	100	0	2	2	100	0	2	2	100	0	2	2	100
A336	111	C	T	T	CC	TT		TT		TT	TT	CC	CT	TT	0	1	1	100	0	2	2	100	0	2	2	100	0	2	2	100
A336	113	G	A	A	GG	AA		AA		AA	AA	GG	GA	AA	0	1	1	100	0	2	2	100	0	2	2	100	0	2	2	100
A337	105	A	G	G	AA	GG	GG	GG		GG	GG	AA	AG	GG	0	3	3	100	0	2	2	100	0	2	2	100	0	2	2	100
A338	42	T	C	C	TT	CC	CC	CC		CC	CC	TT	TC	CC	0	3	3	100	0	2	2	100	0	2	2	100	0	2	2	100
A338	80	G	C	C	GG	CC	CC	CC		CC	CC	GG	GC	CC	0	3	3	100	0	2	2	100	0	2	2	100	0	2	2	100
A338	81	A	G	G	AA	GG	GG	GG		GG	GG	AA	AG	GG	0	3	3	100	0	2	2	100	0	2	2	100	0	2	2	100
A338	129	G	A	A	GG	AA	AA	AA		AA	AA	GG	GA	AA	0	3	3	100	0	2	2	100	0	2	2	100	0	2	2	100
A339	50	C	A	C	CC	CC	CC	CC		CC	AA	CC	CA	AA	3	0	3	0	2	0	2	0	2	0	2	0	0	2	2	100
A339	90	T	C	T	TT	TT	TT	TT		TT	CC	TT	TC	CC	3	0	3	0	2	0	2	0	2	0	2	0	0	2	2	100
A342	53	T	C	C	TT	CC	TT	CC		TT	TT	TT	TC	CC	2	1	3	33.3333	0	2	2	100	2	0	2	0	2	0	2	0
A342	97	G	A	A	GG	AA	AA	AA		AA	AA	GG	GA	AA	0	3	3	100	0	2	2	100	0	2	2	100	0	2	2	100
A342	134	A	G	G	AA	GG	GG	GG		GG	GG	AA	AG	GG	0	3	3	100	0	2	2	100	0	2	2	100	0	2	2	100
A342	135	T	G	T	TT	TT	TT	TT		TT	GG	TT	TG	GG	3	0	3	0	2	0	2	0	2	0	2	0	0	2	2	100
A343	60	T	C	C	TT	CC	CC	CC		CC	CC	TT	TC	CC	0	3	3	100	0	2	2	100	0	2	2	100	0	2	2	100
A343	67	G	A	A	GG	AA	AA	AA		AA	AA	GG	GA	AA	0	3	3	100	0	2	2	100	0	2	2	100	0	2	2	100
A343	137	C	G	G	CC	GG	GG	GG		GG	GG	CC	CG	GG	0	3	3	100	0	2	2	100	0	2	2	100	0	2	2	100
A343	138	G	C	C	GG	CC	CC	CC		CC	CC	GG	GC	CC	0	3	3	100	0	2	2	100	0	2	2	100	0	2	2	100
A344	79	C	T	T	CC	TT	TT	TT		TT	TT	CC	CT	TT	0	3	3	100	0	2	2	100	0	2	2	100	0	2	2	100
A344	119	G	A	G	GG	GG	GG	AA		GG	GG	GG	GA	AA	3	0	3	0	0	2	2	100	2	0	2	0	2	0	2	0
A345	59	T	C	C	TT	CC		CC		CC	CC	TT	TC	CC	0	1	1	100	0	2	2	100	0	2	2	100	0	2	2	100
A345	60	C	G	G	CC	GG		GG		GG	GG	CC	CG	GG	0	1	1	100	0	2	2	100	0	2	2	100	0	2	2	100
A345	69	C	A	C	CC	CC		CC		AA	AA	CC	CA	AA	1	0	1	0	2	0	2	0	0	2	2	100	0	2	2	100
A345	78	A	G	G	AA	GG		GG		GG	GG	AA	AG	GG	0	1	1	100	0	2	2	100	0	2	2	100	0	2	2	100
A345	111	G	A	G	GG	GG		AA		GG	GG	GG	GA	AA	1	0	1	0	0	2	2	100	2	0	2	0	2	0	2	0
A345	116	A	G	A	AA	AA		AA		GG	GG	AA	AG	GG	1	0	1	0	2	0	2	0	0	2	2	100	0	2	2	100
A345	150	A	G	G	AA	GG		GG		GG	GG	AA	AG	GG	0	1	1	100	0	2	2	100	0	2	2	100	0	2	2	100
A345	152	A	G	G	AA	GG		GG		GG	GG	AA	AG	GG	0	1	1	100	0	2	2	100	0	2	2	100	0	2	2	100
A347	48	T	C	T	TT	TT	TT	CC		CC	CC	TT	TC	CC	3	0	3	0	0	2	2	100	0	2	2	100	0	2	2	100
A347	88	A	C	A	AA	AA	AA	AA		CC	AA	AA	AC	CC	3	0	3	0	2	0	2	0	0	2	2	100	2	0	2	0
A347	103	G	C	C	GG	CC	CC	CC		CC	CC	GG	GC	CC	0	3	3	100	0	2	2	100	0	2	2	100	0	2	2	100
A347	141	A	G	G	AA	GG	GG	GG		GG	GG	AA	AG	GG	0	3	3	100	0	2	2	100	0	2	2	100	0	2	2	100
A351	98	G	A	A	GG	AA		GG		GG	GG	GG	GA	AA	0	1	1	100	2	0	2	0	2	0	2	0	2	0	2	0
A351	132	A	G	G	AA	GG		GG		GG	GG	AA	AG	GG	0	1	1	100	0	2	2	100	0	2	2	100	0	2	2	100
A355	1	T	C	C	TT	CC	CC	CC		CC	CC	TT	TC	CC	0	3	3	100	0	2	2	100	0	2	2	100	0	2	2	100
A355	24	T	C	T	TT	TT	TT	TT		TT	CC	TT	TC	CC	3	0	3	0	2	0	2	0	2	0	2	0	0	2	2	100
A355	63	T	C	T	TT	TT	TT	TT		TT	CC	TT	TC	CC	3	0	3	0	2	0	2	0	2	0	2	0	0	2	2	100
A357	54	T	C	C	TT	CC	CC	CC		CC	CC	TT	TC	CC	0	3	3	100	0	2	2	100	0	2	2	100	0	2	2	100
A357	65	T	C	C	TT	CC	CC	CC		CC	CC	TT	TC	CC	0	3	3	100	0	2	2	100	0	2	2	100	0	2	2	100
A357	68	A	C	C	AA	CC	CC	CC		CC	CC	AA	AC	CC	0	3	3	100	0	2	2	100	0	2	2	100	0	2	2	100
A358	97	G	A	A	GG	AA	AA	GG		GG	GG	GG	GA	AA	0	3	3	100	2	0	2	0	2	0	2	0	2	0	2	0
A358	114	T	C	T	TT	TT	TT	TT		CC	CC	TT	TC	CC	3	0	3	0	2	0	2	0	0	2	2	100	0	2	2	100
A358	126	A	G	G	AA	GG	GG	GG		GG	GG	AA	AG	GG	0	3	3	100	0	2	2	100	0	2	2	100	0	2	2	100
A358	129	A	G	G	AA	GG	GG	GG		GG	GG	AA	AG	GG	0	3	3	100	0	2	2	100	0	2	2	100	0	2	2	100
A360	43	C	T	C	CC	CC	CC	TT		CC	CC	CC	CT	TT	3	0	3	0	0	2	2	100	2	0	2	0	2	0	2	0
A360	74	T	C	C	TT	CC	CC	CC		CC	CC	TT	TC	CC	0	3	3	100	0	2	2	100	0	2	2	100	0	2	2	100
A360	77	T	A	A	TT	AA	AA	TT		TT	TT	TT	TA	AA	0	3	3	100	2	0	2	0	2	0	2	0	2	0	2	0
A360	88	G	A	G	GG	GG	GG	AA		GG	GG	GG	GA	AA	3	0	3	0	0	2	2	100	2	0	2	0	2	0	2	0
A361	59	G	A	A	GG	AA		AA		GG	GG	GG	GA	AA	0	1	1	100	0	2	2	100	2	0	2	0	2	0	2	0
A361	73	T	C	T	TT	TT		TT		CC	CC	TT	TC	CC	1	0	1	0	2	0	2	0	0	2	2	100	0	2	2	100
A361	85	A	G	A	AA	AA		AA		AA	GG	AA	AG	GG	1	0	1	0	2	0	2	0	2	0	2	0	0	2	2	100
A364	46	T	C	C	TT	CC	CC	CC		CC	CC	TT	TC	CC	0	3	3	100	0	2	2	100	0	2	2	100	0	2	2	100
A364	51	C	T	T	CC	TT	TT	TT		TT	TT	CC	CT	TT	0	3	3	100	0	2	2	100	0	2	2	100	0	2	2	100
A364	57	G	C	C	GG	CC	CC	CC		CC	CC	GG	GC	CC	0	3	3	100	0	2	2	100	0	2	2	100	0	2	2	100
A364	73	A	G	G	AA	GG	GG	GG		GG	GG	AA	AG	GG	0	3	3	100	0	2	2	100	0	2	2	100	0	2	2	100
A364	124	T	C	C	TT	CC	CC	CC		CC	CC	TT	TC	CC	0	3	3	100	0	2	2	100	0	2	2	100	0	2	2	100
A366	42	C	G	G	CC	GG	GG	GG		GG	GG	CC	CG	GG	0	3	3	100	0	2	2	100	0	2	2	100	0	2	2	100
A366	77	G	C	G	GG	GG	GG	GC		GG	GG	GG	GC	CC	3	0	3	0	1	1	2	50	2	0	2	0	2	0	2	0
A366	81	C	G	C	CC	CC	CC	GG		CC	CC	CC	CG	GG	3	0	3	0	0	2	2	100	2	0	2	0	2	0	2	0
A366	107	C	T	C	CC	CC	CC	TT		TT	TT	CC	CT	TT	3	0	3	0	0	2	2	100	0	2	2	100	0	2	2	100
A366	109	C	T	T	CC	TT	TT	TT		TT	TT	CC	CT	TT	0	3	3	100	0	2	2	100	0	2	2	100	0	2	2	100
A366	124	G	T	T	GG	TT	TT	TT		TT	TT	GG	GT	TT	0	3	3	100	0	2	2	100	0	2	2	100	0	2	2	100
A366	127	G	C	C	GG	CC	CC	CC		CC	CC	GG	GC	CC	0	3	3	100	0	2	2	100	0	2	2	100	0	2	2	100
A366	132	C	A	A	CC	AA	AA	AA		AA	AA	CC	CA	AA	0	3	3	100	0	2	2	100	0	2	2	100	0	2	2	100
A368	32	T	C	T	TT	TT	TT	TC		TT	TT	TT	TC	CC	3	0	3	0	1	1	2	50	2	0	2	0	2	0	2	0
A368	87	T	C	C	TT	CC	CC	CC		CC	CC	TT	TC	CC	0	3	3	100	0	2	2	100	0	2	2	100	0	2	2	100
A368	100	A	G	G	AA	GG	GG	GG		GG	GG	AA	AG	GG	0	3	3	100	0	2	2	100	0	2	2	100	0	2	2	100
A368	123	A	G	A	AA	AA	AA	AA		AA	GG	AA	AG	GG	3	0	3	0	2	0	2	0	2	0	2	0	0	2	2	100
A368	129	A	G	G	AA	GG	GG	GG		GG	GG	AA	AG	GG	0	3	3	100	0	2	2	100	0	2	2	100	0	2	2	100
A373	53	T	C	C	TT	CC	CC	CC		CC	CC	TT	TC	CC	0	3	3	100	0	2	2	100	0	2	2	100	0	2	2	100
A373	54	C	T	T	CC	TT	TT	CC		CC	CC	CC	CT	TT	0	3	3	100	2	0	2	0	2	0	2	0	2	0	2	0
A373	61	T	C	C	TT	CC	CC	CC		CC	CC	TT	TC	CC	0	3	3	100	0	2	2	100	0	2	2	100	0	2	2	100
A373	63	T	C	C	TT	CC	CC	CC		CC	CC	TT	TC	CC	0	3	3	100	0	2	2	100	0	2	2	100	0	2	2	100
A373	88	C	T	T	CC	TT	TT	TT		CC	CC	CC	CT	TT	0	3	3	100	0	2	2	100	2	0	2	0	2	0	2	0
A380	116	A	G	G	AA	GG	GG	GG		GG	GG	AA	AG	GG	0	3	3	100	0	2	2	100	0	2	2	100	0	2	2	100
A381	49	T	C	C	TT	CC	CC	CC		CC	CC	TT	TC	CC	0	3	3	100	0	2	2	100	0	2	2	100	0	2	2	100
A381	50	T	C	C	TT	CC	CC	CC		CC	CC	TT	TC	CC	0	3	3	100	0	2	2	100	0	2	2	100	0	2	2	100
A381	111	C	T	T	CC	TT	TT	TT		TT	TT	CC	CT	TT	0	3	3	100	0	2	2	100	0	2	2	100	0	2	2	100
A381	132	T	C	C	TT	CC	CC	CC		TT	TT	TT	TC	CC	0	3	3	100	0	2	2	100	2	0	2	0	2	0	2	0
A381	141	C	T	T	CC	TT	TT	TT		TT	TT	CC	CT	TT	0	3	3	100	0	2	2	100	0	2	2	100	0	2	2	100
A382	70	G	A	A	GG	AA	AA	AA		AA	AA	GG	GA	AA	0	3	3	100	0	2	2	100	0	2	2	100	0	2	2	100
A382	74	A	G	G	AA	GG	GG	AA		GG	GG	AA	AG	GG	0	3	3	100	2	0	2	0	0	2	2	100	0	2	2	100
A382	88	T	A	A	TT	AA	AA	AA		AA	AA	TT	TA	AA	0	3	3	100	0	2	2	100	0	2	2	100	0	2	2	100
A382	90	C	T	T	CC	TT	TT	CC		CC	CC	CC	CT	TT	0	3	3	100	2	0	2	0	2	0	2	0	2	0	2	0
A382	98	A	G	A	AA	AA	AG	AA		AA	AA	AA	AG	GG	2	1	3	33.3333	2	0	2	0	2	0	2	0	2	0	2	0
A382	107	A	G	G	AA	GG	GG	GG		GG	GG	AA	AG	GG	0	3	3	100	0	2	2	100	0	2	2	100	0	2	2	100
A385	51	A	G	G	AA	GG	GG	GG		GG	GG	AA	AG	GG	0	3	3	100	0	2	2	100	0	2	2	100	0	2	2	100
A385	53	A	C	C	AA	CC	CC	CC		CC	CC	AA	AC	CC	0	3	3	100	0	2	2	100	0	2	2	100	0	2	2	100
A385	79	T	C	T	TT	TT	TT	TT		TT	CC	TT	TC	CC	3	0	3	0	2	0	2	0	2	0	2	0	0	2	2	100
A385	94	A	G	G	AA	GG	GG	GG		GG	GG	AA	AG	GG	0	3	3	100	0	2	2	100	0	2	2	100	0	2	2	100
A385	100	T	G	G	TT	GG	GG	GG		GG	GG	TT	TG	GG	0	3	3	100	0	2	2	100	0	2	2	100	0	2	2	100
A386	51	T	C	C	TT	CC	CC	CC		CC	CC	TT	TC	CC	0	3	3	100	0	2	2	100	0	2	2	100	0	2	2	100
A386	84	G	C	C	GG	CC	GG	GG		GG	GG	GG	GC	CC	2	1	3	33.3333	2	0	2	0	2	0	2	0	2	0	2	0
A386	96	C	T	C	CC	CC	CC	TT		CC	CC	CC	CT	TT	3	0	3	0	0	2	2	100	2	0	2	0	2	0	2	0
A386	98	T	C	T	TT	TT	TT	TT		CC	TT	TT	TC	CC	3	0	3	0	2	0	2	0	0	2	2	100	2	0	2	0
A387	82	A	G	G	AA	GG	GG	GG		GG	GG	AA	AG	GG	0	3	3	100	0	2	2	100	0	2	2	100	0	2	2	100
A387	142	C	G	G	CC	GG	GG	GG		GG	GG	CC	CG	GG	0	3	3	100	0	2	2	100	0	2	2	100	0	2	2	100
A388	100	A	G	G	AA	GG	GG	GG		GG	GG	AA	AG	GG	0	3	3	100	0	2	2	100	0	2	2	100	0	2	2	100
A388	127	A	G	G	AA	GG	GG	GG		GG	GG	AA	AG	GG	0	3	3	100	0	2	2	100	0	2	2	100	0	2	2	100
A388	128	A	G	G	AA	GG	GG	AG		GG	GG	AA	AG	GG	0	3	3	100	1	1	2	50	0	2	2	100	0	2	2	100
A388	139	C	T	T	CC	TT	TT	TT		TT	TT	CC	CT	TT	0	3	3	100	0	2	2	100	0	2	2	100	0	2	2	100
A389	60	T	C	C	TT	CC		CC		CC	CC	TT	TC	CC	0	1	1	100	0	2	2	100	0	2	2	100	0	2	2	100
A389	96	T	G	T	TT	TT		TG		TT	TT	TT	TG	GG	1	0	1	0	1	1	2	50	2	0	2	0	2	0	2	0
A389	116	A	G	G	AA	GG		GG		GG	GG	AA	AG	GG	0	1	1	100	0	2	2	100	0	2	2	100	0	2	2	100
A390	67	A	G	G	AA	GG	GG	GG		GG	GG	AA	AG	GG	0	3	3	100	0	2	2	100	0	2	2	100	0	2	2	100
A393	48	C	T	C	CC	CC	CC	CT		CC	CC	CC	CT	TT	3	0	3	0	1	1	2	50	2	0	2	0	2	0	2	0
A393	53	A	G	A	AA	AA	AA	AG		AA	AA	AA	AG	GG	3	0	3	0	1	1	2	50	2	0	2	0	2	0	2	0
A393	58	T	C	C	TT	CC	CC	CC		CC	CC	TT	TC	CC	0	3	3	100	0	2	2	100	0	2	2	100	0	2	2	100
A393	59	T	C	C	TT	CC	CC	CC		CC	CC	TT	TC	CC	0	3	3	100	0	2	2	100	0	2	2	100	0	2	2	100
A393	62	T	C	C	TT	CC	CC	CC		CC	CC	TT	TC	CC	0	3	3	100	0	2	2	100	0	2	2	100	0	2	2	100
A393	66	T	C	C	TT	CC	CC	CC		CC	CC	TT	TC	CC	0	3	3	100	0	2	2	100	0	2	2	100	0	2	2	100
A393	104	T	C	T	TT	TT	TT	CC		TT	TT	TT	TC	CC	3	0	3	0	0	2	2	100	2	0	2	0	2	0	2	0
A393	111	A	G	G	AA	GG	GG	AA		AA	GG	AA	AG	GG	0	3	3	100	2	0	2	0	2	0	2	0	0	2	2	100
A393	121	T	C	C	TT	CC	CC	CC		CC	CC	TT	TC	CC	0	3	3	100	0	2	2	100	0	2	2	100	0	2	2	100
A396	72	G	A	G	GG	GG	GG	GA		GG	GG	GG	GA	AA	3	0	3	0	1	1	2	50	2	0	2	0	2	0	2	0
A396	82	T	A	T	TT	TT	AA	TT		TT	TT	TT	TA	AA	1	2	3	66.6667	2	0	2	0	2	0	2	0	2	0	2	0
A396	97	C	T	T	CC	TT	TT	TT		TT	TT	CC	CT	TT	0	3	3	100	0	2	2	100	0	2	2	100	0	2	2	100
A396	107	A	G	G	AA	GG	GG	GG		GG	GG	AA	AG	GG	0	3	3	100	0	2	2	100	0	2	2	100	0	2	2	100
A398	47	G	T	T	GG	TT	TT	TT		TT	TT	GG	GT	TT	0	3	3	100	0	2	2	100	0	2	2	100	0	2	2	100
A399	51	G	A	A	GG	AA	AA	AA		AA	AA	GG	GA	AA	0	3	3	100	0	2	2	100	0	2	2	100	0	2	2	100
A399	69	C	G	G	CC	GG	GG	GG		GG	GG	CC	CG	GG	0	3	3	100	0	2	2	100	0	2	2	100	0	2	2	100
A399	71	G	A	G	GG	GG	GG	GG		AA	GG	GG	GA	AA	3	0	3	0	2	0	2	0	0	2	2	100	2	0	2	0
A399	77	G	A	G	GG	GG	GG	GG		GG	AA	GG	GA	AA	3	0	3	0	2	0	2	0	2	0	2	0	0	2	2	100
A401	41	A	G	G	AA	GG	GG	GG		GG	GG	AA	AG	GG	0	3	3	100	0	2	2	100	0	2	2	100	0	2	2	100
A401	49	G	A	G	GG	GG	GG	GG		GG	AA	GG	GA	AA	3	0	3	0	2	0	2	0	2	0	2	0	0	2	2	100
A401	69	A	G	G	AA	GG	GG	GG		AG	GG	AA	AG	GG	0	3	3	100	0	2	2	100	1	1	2	50	0	2	2	100
A401	88	G	C	C	GG	CC	CC	GG		GG	GG	GG	GC	CC	0	3	3	100	2	0	2	0	2	0	2	0	2	0	2	0
A404	33	T	C	C	TT	CC	CC	TT		CC	CC	TT	TC	CC	0	3	3	100	2	0	2	0	0	2	2	100	0	2	2	100
A404	115	G	T	G	GG	GG	GG	GG		GG	TT	GG	GT	TT	3	0	3	0	2	0	2	0	2	0	2	0	0	2	2	100
A405	38	C	G	G	CC	GG	GG	CG		CC	CC	CC	CG	GG	0	3	3	100	1	1	2	50	2	0	2	0	2	0	2	0
A405	95	A	T	T	AA	TT	TT	TT		TT	TT	AA	AT	TT	0	3	3	100	0	2	2	100	0	2	2	100	0	2	2	100
A407	39	A	T	T	AA	TT	TT	TT		TT	TT	AA	AT	TT	0	3	3	100	0	2	2	100	0	2	2	100	0	2	2	100
A407	40	A	G	G	AA	GG	GG	GG		GG	GG	AA	AG	GG	0	3	3	100	0	2	2	100	0	2	2	100	0	2	2	100
A407	41	T	C	C	TT	CC	CC	CC		CC	CC	TT	TC	CC	0	3	3	100	0	2	2	100	0	2	2	100	0	2	2	100
A407	45	A	T	T	AA	TT	TT	TT		TT	TT	AA	AT	TT	0	3	3	100	0	2	2	100	0	2	2	100	0	2	2	100
A407	48	C	G	G	CC	GG	GG	GG		GG	GG	CC	CG	GG	0	3	3	100	0	2	2	100	0	2	2	100	0	2	2	100
A407	55	A	G	G	AA	GG	GG	GG		GG	GG	AA	AG	GG	0	3	3	100	0	2	2	100	0	2	2	100	0	2	2	100
A407	60	C	T	T	CC	TT	TT	TT		TT	TT	CC	CT	TT	0	3	3	100	0	2	2	100	0	2	2	100	0	2	2	100
A407	75	A	G	G	AA	GG	GG	GG		GG	GG	AA	AG	GG	0	3	3	100	0	2	2	100	0	2	2	100	0	2	2	100
A407	121	C	T	C	CC	CC	CC	CC		CC	TT	CC	CT	TT	3	0	3	0	2	0	2	0	2	0	2	0	0	2	2	100
A407	124	C	T	T	CC	TT	TT	TT		TT	TT	CC	CT	TT	0	3	3	100	0	2	2	100	0	2	2	100	0	2	2	100
A407	127	G	A	G	GG	GG	GG	AA		AA	AA	GG	GA	AA	3	0	3	0	0	2	2	100	0	2	2	100	0	2	2	100
A407	128	C	T	C	CC	CC	CC	CC		CC	TT	CC	CT	TT	3	0	3	0	2	0	2	0	2	0	2	0	0	2	2	100
A409	136	C	A	A	CC	AA	AA	AA		AA	AA	CC	CA	AA	0	3	3	100	0	2	2	100	0	2	2	100	0	2	2	100
A410	81	T	C	C	TT	CC	CC	CC		TT	TT	TT	TC	CC	0	3	3	100	0	2	2	100	2	0	2	0	2	0	2	0
A410	82	G	A	A	GG	AA	AA	GG		GG	GG	GG	GA	AA	0	3	3	100	2	0	2	0	2	0	2	0	2	0	2	0
A412	115	A	T	T	AA	TT	AA	AA		AA	AA	AA	AT	TT	2	1	3	33.3333	2	0	2	0	2	0	2	0	2	0	2	0
A412	144	A	G	G	AA	GG	GG	GG		AA	AA	AA	AG	GG	0	3	3	100	0	2	2	100	2	0	2	0	2	0	2	0
A414	73	A	G	G	AA	GG	GG	GG		GG	GG	AA	AG	GG	0	3	3	100	0	2	2	100	0	2	2	100	0	2	2	100
A414	104	G	A	G	GG	GG	GG	AA		GG	GG	GG	GA	AA	3	0	3	0	0	2	2	100	2	0	2	0	2	0	2	0
A414	113	C	G	G	CC	GG	GG	GG		GG	GG	CC	CG	GG	0	3	3	100	0	2	2	100	0	2	2	100	0	2	2	100
A414	122	C	T	C	CC	CC	CC	TT		CC	CC	CC	CT	TT	3	0	3	0	0	2	2	100	2	0	2	0	2	0	2	0
A414	124	T	A	A	TT	AA	AA	AA		AA	AA	TT	TA	AA	0	3	3	100	0	2	2	100	0	2	2	100	0	2	2	100
A414	140	A	G	G	AA	GG	GG	GG		GG	GG	AA	AG	GG	0	3	3	100	0	2	2	100	0	2	2	100	0	2	2	100
A415	10	C	G	G	CC	GG	GG	GG		GG	GG	CC	CG	GG	0	3	3	100	0	2	2	100	0	2	2	100	0	2	2	100
A415	31	T	C	C	TT	CC	CC	TT		CC	CC	TT	TC	CC	0	3	3	100	2	0	2	0	0	2	2	100	0	2	2	100
A415	54	G	T	T	GG	TT	TT	TT		TT	TT	GG	GT	TT	0	3	3	100	0	2	2	100	0	2	2	100	0	2	2	100
A415	75	C	A	A	CC	AA	AA	AA		AA	AA	CC	CA	AA	0	3	3	100	0	2	2	100	0	2	2	100	0	2	2	100
A418	25	T	C	C	TT	CC	CC	CC		CC	CC	TT	TC	CC	0	3	3	100	0	2	2	100	0	2	2	100	0	2	2	100
A418	36	C	T	C	CC	CC	CC	CC		CC	TT	CC	CT	TT	3	0	3	0	2	0	2	0	2	0	2	0	0	2	2	100
A418	43	G	A	G	GG	GG	GG	GA		GG	GG	GG	GA	AA	3	0	3	0	1	1	2	50	2	0	2	0	2	0	2	0
A418	111	G	A	G	GG	GG	GG	GG		GG	AA	GG	GA	AA	3	0	3	0	2	0	2	0	2	0	2	0	0	2	2	100
A418	112	C	A	C	CC	CC	CC	CC		CC	AA	CC	CA	AA	3	0	3	0	2	0	2	0	2	0	2	0	0	2	2	100
A418	123	T	C	C	TT	CC	CC	CC		CC	CC	TT	TC	CC	0	3	3	100	0	2	2	100	0	2	2	100	0	2	2	100
A421	65	G	T	T	GG	TT	TT	TT		TT	TT	GG	GT	TT	0	3	3	100	0	2	2	100	0	2	2	100	0	2	2	100
A421	70	A	G	G	AA	GG	GG	GG		GG	GG	AA	AG	GG	0	3	3	100	0	2	2	100	0	2	2	100	0	2	2	100
A421	77	T	C	C	TT	CC	CC	CC		CC	CC	TT	TC	CC	0	3	3	100	0	2	2	100	0	2	2	100	0	2	2	100
A421	82	G	T	T	GG	TT	TT	TT		TT	TT	GG	GT	TT	0	3	3	100	0	2	2	100	0	2	2	100	0	2	2	100
A421	95	G	A	A	GG	AA	AA	AA		AA	AA	GG	GA	AA	0	3	3	100	0	2	2	100	0	2	2	100	0	2	2	100
A421	103	T	C	C	TT	CC	CC	CC		CC	CC	TT	TC	CC	0	3	3	100	0	2	2	100	0	2	2	100	0	2	2	100
A421	104	G	A	A	GG	AA	AA	AA		AA	AA	GG	GA	AA	0	3	3	100	0	2	2	100	0	2	2	100	0	2	2	100
A421	114	A	T	T	AA	TT	TT	TT		TT	TT	AA	AT	TT	0	3	3	100	0	2	2	100	0	2	2	100	0	2	2	100
A423	68	T	G	G	TT	GG	GG	GG		GG	GG	TT	TG	GG	0	3	3	100	0	2	2	100	0	2	2	100	0	2	2	100
A423	87	T	C	C	TT	CC	CC	CC		CC	CC	TT	TC	CC	0	3	3	100	0	2	2	100	0	2	2	100	0	2	2	100
A423	88	G	A	A	GG	AA	AA	AA		AA	AA	GG	GA	AA	0	3	3	100	0	2	2	100	0	2	2	100	0	2	2	100
A431	117	C	T	T	CC	TT	TT	TT		TT	TT	CC	CT	TT	0	3	3	100	0	2	2	100	0	2	2	100	0	2	2	100
A431	129	C	T	T	CC	TT	TT	TT		TT	TT	CC	CT	TT	0	3	3	100	0	2	2	100	0	2	2	100	0	2	2	100
A432	109	A	G	G	AA	GG	GG	GG		GG	GG	AA	AG	GG	0	3	3	100	0	2	2	100	0	2	2	100	0	2	2	100
A432	110	A	G	G	AA	GG	GG	GG		GG	GG	AA	AG	GG	0	3	3	100	0	2	2	100	0	2	2	100	0	2	2	100
A435	45	A	C	C	AA	CC	CC	CC		CC	CC	AA	AC	CC	0	3	3	100	0	2	2	100	0	2	2	100	0	2	2	100
A435	79	C	T	T	CC	TT	TT	TT		TT	TT	CC	CT	TT	0	3	3	100	0	2	2	100	0	2	2	100	0	2	2	100
A435	93	T	C	C	TT	CC	CC	CC		CC	CC	TT	TC	CC	0	3	3	100	0	2	2	100	0	2	2	100	0	2	2	100
A435	105	A	G	G	AA	GG	GG	GG		GG	GG	AA	AG	GG	0	3	3	100	0	2	2	100	0	2	2	100	0	2	2	100
A435	110	A	T	T	AA	TT	TT	TT		TT	TT	AA	AT	TT	0	3	3	100	0	2	2	100	0	2	2	100	0	2	2	100
A435	114	A	G	A	AA	AA	AA	AG		AA	AA	AA	AG	GG	3	0	3	0	1	1	2	50	2	0	2	0	2	0	2	0
A435	115	A	G	A	AA	AA	AA	AA		GG	GG	AA	AG	GG	3	0	3	0	2	0	2	0	0	2	2	100	0	2	2	100
A435	116	A	G	G	AA	GG	GG	GG		GG	GG	AA	AG	GG	0	3	3	100	0	2	2	100	0	2	2	100	0	2	2	100
A435	119	A	G	A	AA	AA	AA	AA		GG	GG	AA	AG	GG	3	0	3	0	2	0	2	0	0	2	2	100	0	2	2	100
A435	120	T	C	T	TT	TT	TT	CC		TT	TT	TT	TC	CC	3	0	3	0	0	2	2	100	2	0	2	0	2	0	2	0
A438	30	T	A	A	TT	AA	AA	AA		AA	AA	TT	TA	AA	0	3	3	100	0	2	2	100	0	2	2	100	0	2	2	100
A438	35	T	C	C	TT	CC	CC	CC		CC	CC	TT	TC	CC	0	3	3	100	0	2	2	100	0	2	2	100	0	2	2	100
A438	43	T	C	C	TT	CC	CC	CC		CC	CC	TT	TC	CC	0	3	3	100	0	2	2	100	0	2	2	100	0	2	2	100
A438	59	T	C	C	TT	CC	CC	CC		CC	CC	TT	TC	CC	0	3	3	100	0	2	2	100	0	2	2	100	0	2	2	100
A438	64	C	T	T	CC	TT	TT	TT		TT	TT	CC	CT	TT	0	3	3	100	0	2	2	100	0	2	2	100	0	2	2	100
A438	68	C	T	C	CC	CC	CC	CT		CC	CC	CC	CT	TT	3	0	3	0	1	1	2	50	2	0	2	0	2	0	2	0
A438	90	G	A	A	GG	AA	AA	AA		AA	AA	GG	GA	AA	0	3	3	100	0	2	2	100	0	2	2	100	0	2	2	100
A439	39	T	A	A	TT	AA	AA	AA		AA	AA	TT	TA	AA	0	3	3	100	0	2	2	100	0	2	2	100	0	2	2	100
A439	41	T	C	C	TT	CC	CC	CC		CC	CC	TT	TC	CC	0	3	3	100	0	2	2	100	0	2	2	100	0	2	2	100
A442	26	T	C	C	TT	CC	CC	CC		CC	CC	TT	TC	CC	0	3	3	100	0	2	2	100	0	2	2	100	0	2	2	100
A442	29	T	C	C	TT	CC	CC	CC		CC	CC	TT	TC	CC	0	3	3	100	0	2	2	100	0	2	2	100	0	2	2	100
A442	36	T	C	C	TT	CC	CC	CC		CC	CC	TT	TC	CC	0	3	3	100	0	2	2	100	0	2	2	100	0	2	2	100
A442	43	T	C	C	TT	CC	CC	CC		CC	CC	TT	TC	CC	0	3	3	100	0	2	2	100	0	2	2	100	0	2	2	100
A442	75	T	C	C	TT	CC	CC	CC		CC	CC	TT	TC	CC	0	3	3	100	0	2	2	100	0	2	2	100	0	2	2	100
A442	79	T	C	C	TT	CC	CC	CC		CC	CC	TT	TC	CC	0	3	3	100	0	2	2	100	0	2	2	100	0	2	2	100
A442	87	T	G	G	TT	GG	GG	GG		GG	GG	TT	TG	GG	0	3	3	100	0	2	2	100	0	2	2	100	0	2	2	100
A442	89	T	C	C	TT	CC	CC	CC		CC	CC	TT	TC	CC	0	3	3	100	0	2	2	100	0	2	2	100	0	2	2	100
A442	119	C	A	C	CC	CC	CC	CA		CC	CC	CC	CA	AA	3	0	3	0	1	1	2	50	2	0	2	0	2	0	2	0
A443	33	T	C	C	TT	CC	CC	CC		CC	CC	TT	TC	CC	0	3	3	100	0	2	2	100	0	2	2	100	0	2	2	100
A443	86	C	T	T	CC	TT	TT	TT		TT	TT	CC	CT	TT	0	3	3	100	0	2	2	100	0	2	2	100	0	2	2	100
A443	90	C	T	T	CC	TT	TT	TT		TT	TT	CC	CT	TT	0	3	3	100	0	2	2	100	0	2	2	100	0	2	2	100
A443	102	T	G	T	TT	TT	TT	TT		TT	TG	TT	TG	GG	3	0	3	0	2	0	2	0	2	0	2	0	1	1	2	50
A443	116	A	T	T	AA	TT	TT	TT		TT	TT	AA	AT	TT	0	3	3	100	0	2	2	100	0	2	2	100	0	2	2	100
A443	123	A	T	A	AA	AA	AA	TT		AA	AA	AA	AT	TT	3	0	3	0	0	2	2	100	2	0	2	0	2	0	2	0
A445	46	C	T	T	CC	TT	TT	TT		TT	TT	CC	CT	TT	0	3	3	100	0	2	2	100	0	2	2	100	0	2	2	100
A445	61	A	T	T	AA	TT	TT	TT		TT	TT	AA	AT	TT	0	3	3	100	0	2	2	100	0	2	2	100	0	2	2	100
A445	100	T	A	T	TT	TT	TT	AA		TT	TT	TT	TA	AA	3	0	3	0	0	2	2	100	2	0	2	0	2	0	2	0
A445	101	T	G	T	TT	TT	TT	GG		TT	TT	TT	TG	GG	3	0	3	0	0	2	2	100	2	0	2	0	2	0	2	0
A450	29	G	A	G	GG	GG	GG	GG		GG	AA	GG	GA	AA	3	0	3	0	2	0	2	0	2	0	2	0	0	2	2	100
A450	89	G	A	A	GG	AA	AA	AA		AA	AA	GG	GA	AA	0	3	3	100	0	2	2	100	0	2	2	100	0	2	2	100
A451	29	T	C	C	TT	CC	CC	CC		CC	CC	TT	TC	CC	0	3	3	100	0	2	2	100	0	2	2	100	0	2	2	100
A451	31	T	C	C	TT	CC	CC	CC		CC	CC	TT	TC	CC	0	3	3	100	0	2	2	100	0	2	2	100	0	2	2	100
A451	38	G	A	A	GG	AA	AA	AA		AA	AA	GG	GA	AA	0	3	3	100	0	2	2	100	0	2	2	100	0	2	2	100
A451	43	T	C	C	TT	CC	CC	CC		CC	CC	TT	TC	CC	0	3	3	100	0	2	2	100	0	2	2	100	0	2	2	100
A451	62	G	A	A	GG	AA	AA	AA		AA	AA	GG	GA	AA	0	3	3	100	0	2	2	100	0	2	2	100	0	2	2	100
A451	63	T	C	C	TT	CC	CC	CC		CC	CC	TT	TC	CC	0	3	3	100	0	2	2	100	0	2	2	100	0	2	2	100
A451	77	C	T	T	CC	TT	TT	TT		TT	TT	CC	CT	TT	0	3	3	100	0	2	2	100	0	2	2	100	0	2	2	100
A451	99	A	G	A	AA	AA	AA	AA		GG	GG	AA	AG	GG	3	0	3	0	2	0	2	0	0	2	2	100	0	2	2	100
A451	102	T	A	A	TT	AA	AA	AA		AA	AA	TT	TA	AA	0	3	3	100	0	2	2	100	0	2	2	100	0	2	2	100
A451	108	C	T	T	CC	TT	TT	TT		TT	TT	CC	CT	TT	0	3	3	100	0	2	2	100	0	2	2	100	0	2	2	100
A454	95	T	G	G	TT	GG	GG	GG		GG	GG	TT	TG	GG	0	3	3	100	0	2	2	100	0	2	2	100	0	2	2	100
A454	131	T	C	C	TT	CC	CC	CC		CC	CC	TT	TC	CC	0	3	3	100	0	2	2	100	0	2	2	100	0	2	2	100
A454	137	A	G	A	AA	AA	AA	GG		GG	GG	AA	AG	GG	3	0	3	0	0	2	2	100	0	2	2	100	0	2	2	100
A454	150	C	G	G	CC	GG	GG	GG		GG	GG	CC	CG	GG	0	3	3	100	0	2	2	100	0	2	2	100	0	2	2	100
A454	151	G	C	C	GG	CC	CC	CC		CC	CC	GG	GC	CC	0	3	3	100	0	2	2	100	0	2	2	100	0	2	2	100
A454	155	A	T	T	AA	TT	TT	TT		TT	TT	AA	AT	TT	0	3	3	100	0	2	2	100	0	2	2	100	0	2	2	100
A456	51	T	C	C	TT	CC	CC	CC		CC	CC	TT	TC	CC	0	3	3	100	0	2	2	100	0	2	2	100	0	2	2	100
A456	74	T	G	G	TT	GG	GG	TT		TT	TT	TT	TG	GG	0	3	3	100	2	0	2	0	2	0	2	0	2	0	2	0
A456	100	G	A	A	GG	AA	AA	AA		AA	AA	GG	GA	AA	0	3	3	100	0	2	2	100	0	2	2	100	0	2	2	100
A456	107	C	T	T	CC	TT	TT	CC		CC	CC	CC	CT	TT	0	3	3	100	2	0	2	0	2	0	2	0	2	0	2	0
B003	67	A	G	A	AA	AA	AA	AA		AA	GG	AA	AG	GG	3	0	3	0	2	0	2	0	2	0	2	0	0	2	2	100
B003	113	C	T	T	CC	TT	TT	CC		CC	CC	CC	CT	TT	0	3	3	100	2	0	2	0	2	0	2	0	2	0	2	0
B003	146	G	A	A	GG	AA	AA	AA		AA	AA	GG	GA	AA	0	3	3	100	0	2	2	100	0	2	2	100	0	2	2	100
B003	167	A	G	G	AA	GG	GG	GG		GG	GG	AA	AG	GG	0	3	3	100	0	2	2	100	0	2	2	100	0	2	2	100
B003	185	T	C	C	TT	CC	CC	CC		CC	CC	TT	TC	CC	0	3	3	100	0	2	2	100	0	2	2	100	0	2	2	100
B003	188	G	C	C	GG	CC	CC	CC		CC	CC	GG	GC	CC	0	3	3	100	0	2	2	100	0	2	2	100	0	2	2	100
B003	206	T	A	A	TT	AA	AA	AA		AA	AA	TT	TA	AA	0	3	3	100	0	2	2	100	0	2	2	100	0	2	2	100
B003	208	C	G	G	CC	GG	GG	GG		GG	GG	CC	CG	GG	0	3	3	100	0	2	2	100	0	2	2	100	0	2	2	100
B003	209	A	G	G	AA	GG	GG	GG		GG	GG	AA	AG	GG	0	3	3	100	0	2	2	100	0	2	2	100	0	2	2	100
B003	215	T	C	C	TT	CC	CC	CC		CC	CC	TT	TC	CC	0	3	3	100	0	2	2	100	0	2	2	100	0	2	2	100
B003	217	T	C	C	TT	CC	CC	CC		CC	CC	TT	TC	CC	0	3	3	100	0	2	2	100	0	2	2	100	0	2	2	100
B003	218	C	A	A	CC	AA	AA	AA		AA	AA	CC	CA	AA	0	3	3	100	0	2	2	100	0	2	2	100	0	2	2	100
B003	219	T	G	G	TT	GG	GG	GG		GG	GG	TT	TG	GG	0	3	3	100	0	2	2	100	0	2	2	100	0	2	2	100
B003	220	A	G	G	AA	GG	GG	GG		GG	GG	AA	AG	GG	0	3	3	100	0	2	2	100	0	2	2	100	0	2	2	100
B003	222	C	A	A	CC	AA	AA	AA		AA	AA	CC	CA	AA	0	3	3	100	0	2	2	100	0	2	2	100	0	2	2	100
B003	223	T	C	C	TT	CC	CC	CC		CC	CC	TT	TC	CC	0	3	3	100	0	2	2	100	0	2	2	100	0	2	2	100
B008	82	C	T	C	CC	CC	CC	CC		CT	CC	CC	CT	TT	3	0	3	0	2	0	2	0	1	1	2	50	2	0	2	0
B008	108	T	C	C	TT	CC	CC	CC		CC	CC	TT	TC	CC	0	3	3	100	0	2	2	100	0	2	2	100	0	2	2	100
B008	158	T	G	G	TT	GG	GG	GG		GG	GG	TT	TG	GG	0	3	3	100	0	2	2	100	0	2	2	100	0	2	2	100
B008	179	A	G	A	AA	AA	AA	AA		AA	GG	AA	AG	GG	3	0	3	0	2	0	2	0	2	0	2	0	0	2	2	100
B008	184	A	T	A	AA	AA	AA	AA		TT	TT	AA	AT	TT	3	0	3	0	2	0	2	0	0	2	2	100	0	2	2	100
B010	82	G	T	G	GG	GG		GG		TT	GG	GG	GT	TT	1	0	1	0	2	0	2	0	0	2	2	100	2	0	2	0
B010	83	G	C	C	GG	CC		CC		CC	CC	GG	GC	CC	0	1	1	100	0	2	2	100	0	2	2	100	0	2	2	100
B010	92	A	G	G	AA	GG		GG		GG	GG	AA	AG	GG	0	1	1	100	0	2	2	100	0	2	2	100	0	2	2	100
B010	101	C	G	G	CC	GG		GG		GG	GG	CC	CG	GG	0	1	1	100	0	2	2	100	0	2	2	100	0	2	2	100
B010	149	G	A	A	GG	AA		AA		AA	AA	GG	GA	AA	0	1	1	100	0	2	2	100	0	2	2	100	0	2	2	100
B010	152	C	A	A	CC	AA		AA		AA	AA	CC	CA	AA	0	1	1	100	0	2	2	100	0	2	2	100	0	2	2	100
B010	155	C	T	T	CC	TT		TT		TT	TT	CC	CT	TT	0	1	1	100	0	2	2	100	0	2	2	100	0	2	2	100
B010	156	A	G	G	AA	GG		GG		GG	GG	AA	AG	GG	0	1	1	100	0	2	2	100	0	2	2	100	0	2	2	100
B010	160	A	G	G	AA	GG		GG		GG	GG	AA	AG	GG	0	1	1	100	0	2	2	100	0	2	2	100	0	2	2	100
B010	161	C	T	T	CC	TT		TT		TT	TT	CC	CT	TT	0	1	1	100	0	2	2	100	0	2	2	100	0	2	2	100
B010	162	A	G	G	AA	GG		GG		GG	GG	AA	AG	GG	0	1	1	100	0	2	2	100	0	2	2	100	0	2	2	100
B010	163	A	T	T	AA	TT		TT		TT	TT	AA	AT	TT	0	1	1	100	0	2	2	100	0	2	2	100	0	2	2	100
B010	168	A	T	T	AA	TT		TT		TT	TT	AA	AT	TT	0	1	1	100	0	2	2	100	0	2	2	100	0	2	2	100
B011	70	T	C	C	TT	CC	CC	CC		CC	CC	TT	TC	CC	0	3	3	100	0	2	2	100	0	2	2	100	0	2	2	100
B011	77	T	C	C	TT	CC	CC	CC		CC	CC	TT	TC	CC	0	3	3	100	0	2	2	100	0	2	2	100	0	2	2	100
B011	99	T	C	C	TT	CC	CC	CC		CC	CC	TT	TC	CC	0	3	3	100	0	2	2	100	0	2	2	100	0	2	2	100
B011	153	G	A	A	GG	AA	AA	AA		AA	AA	GG	GA	AA	0	3	3	100	0	2	2	100	0	2	2	100	0	2	2	100
B011	170	A	G	A	AA	AA	AA	AA		AA	AG	AA	AG	GG	3	0	3	0	2	0	2	0	2	0	2	0	1	1	2	50
B014	43	T	C	C	TT	CC	CC	CC		CC	CC	TT	TC	CC	0	3	3	100	0	2	2	100	0	2	2	100	0	2	2	100
B014	50	T	C	C	TT	CC	CC	CC		CC	CC	TT	TC	CC	0	3	3	100	0	2	2	100	0	2	2	100	0	2	2	100
B014	92	C	T	C	CC	CC	CC	CC		TT	CC	CC	CT	TT	3	0	3	0	2	0	2	0	0	2	2	100	2	0	2	0
B014	99	G	A	G	GG	GG	GG	AA		GG	GG	GG	GA	AA	3	0	3	0	0	2	2	100	2	0	2	0	2	0	2	0
B014	110	T	C	C	TT	CC	CC	CC		CC	CC	TT	TC	CC	0	3	3	100	0	2	2	100	0	2	2	100	0	2	2	100
B014	123	A	G	G	AA	GG	GG	GG		GG	GG	AA	AG	GG	0	3	3	100	0	2	2	100	0	2	2	100	0	2	2	100
B017	54	A	C	C	AA	CC	CC	CC		CC	CC	AA	AC	CC	0	3	3	100	0	2	2	100	0	2	2	100	0	2	2	100
B017	106	T	C	T	TT	TT	TT	TT		CC	CC	TT	TC	CC	3	0	3	0	2	0	2	0	0	2	2	100	0	2	2	100
B017	119	T	C	C	TT	CC	CC	CC		CC	CC	TT	TC	CC	0	3	3	100	0	2	2	100	0	2	2	100	0	2	2	100
B017	142	T	C	C	TT	CC	CC	CC		CC	CC	TT	TC	CC	0	3	3	100	0	2	2	100	0	2	2	100	0	2	2	100
B017	162	T	A	T	TT	TT	TT	AA		TT	TT	TT	TA	AA	3	0	3	0	0	2	2	100	2	0	2	0	2	0	2	0
B017	183	A	G	G	AA	GG	GG	GG		GG	GG	AA	AG	GG	0	3	3	100	0	2	2	100	0	2	2	100	0	2	2	100
B017	187	A	G	G	AA	GG	GG	GG		GG	GG	AA	AG	GG	0	3	3	100	0	2	2	100	0	2	2	100	0	2	2	100
B022	70	A	C	A	AA	AA	AA	AA		CC	CC	AA	AC	CC	3	0	3	0	2	0	2	0	0	2	2	100	0	2	2	100
B022	82	T	C	C	TT	CC	CC	CC		CC	CC	TT	TC	CC	0	3	3	100	0	2	2	100	0	2	2	100	0	2	2	100
B022	164	C	T	C	CC	CC	CC	CT		CC	CC	CC	CT	TT	3	0	3	0	1	1	2	50	2	0	2	0	2	0	2	0
B022	165	A	G	G	AA	GG	GG	GG		GG	GG	AA	AG	GG	0	3	3	100	0	2	2	100	0	2	2	100	0	2	2	100
B023	52	T	C	C	TT	CC	CC	CC		CC	CC	TT	TC	CC	0	3	3	100	0	2	2	100	0	2	2	100	0	2	2	100
B023	53	T	C	C	TT	CC	CC	CC		CC	CC	TT	TC	CC	0	3	3	100	0	2	2	100	0	2	2	100	0	2	2	100
B023	72	A	G	G	AA	GG	GG	GG		GG	GG	AA	AG	GG	0	3	3	100	0	2	2	100	0	2	2	100	0	2	2	100
B023	76	A	G	G	AA	GG	GG	GG		GG	GG	AA	AG	GG	0	3	3	100	0	2	2	100	0	2	2	100	0	2	2	100
B023	86	A	G	G	AA	GG	GG	GG		GG	GG	AA	AG	GG	0	3	3	100	0	2	2	100	0	2	2	100	0	2	2	100
B023	89	G	A	G	GG	GG	GG	GG		GA	GG	GG	GA	AA	3	0	3	0	2	0	2	0	1	1	2	50	2	0	2	0
B023	116	A	G	G	AA	GG	GG	GG		GG	GG	AA	AG	GG	0	3	3	100	0	2	2	100	0	2	2	100	0	2	2	100
B023	119	A	G	G	AA	GG	GG	GG		GG	GG	AA	AG	GG	0	3	3	100	0	2	2	100	0	2	2	100	0	2	2	100
B023	147	C	T	T	CC	TT	TT	TT		TT	TT	CC	CT	TT	0	3	3	100	0	2	2	100	0	2	2	100	0	2	2	100
B025	75	C	T	T	CC	TT	TT	CC		CC	CC	CC	CT	TT	0	3	3	100	2	0	2	0	2	0	2	0	2	0	2	0
B025	76	C	G	G	CC	GG	GG	GG		GG	GG	CC	CG	GG	0	3	3	100	0	2	2	100	0	2	2	100	0	2	2	100
B025	82	G	A	G	GG	GG	GG	AA		GG	GG	GG	GA	AA	3	0	3	0	0	2	2	100	2	0	2	0	2	0	2	0
B025	96	A	G	A	AA	AA	AA	AA		GG	AA	AA	AG	GG	3	0	3	0	2	0	2	0	0	2	2	100	2	0	2	0
B025	123	T	C	T	TT	TT	TT	TC		TT	TT	TT	TC	CC	3	0	3	0	1	1	2	50	2	0	2	0	2	0	2	0
B025	125	C	T	C	CC	CC	CC	CC		TT	CC	CC	CT	TT	3	0	3	0	2	0	2	0	0	2	2	100	2	0	2	0
B025	196	T	C	T	TT	TT	TT	TC		TT	TT	TT	TC	CC	3	0	3	0	1	1	2	50	2	0	2	0	2	0	2	0
B025	205	A	G	G	AA	GG	GG	GG		GG	GG	AA	AG	GG	0	3	3	100	0	2	2	100	0	2	2	100	0	2	2	100
B029	72	A	G	G	AA	GG	GG	GG		GG	GG	AA	AG	GG	0	3	3	100	0	2	2	100	0	2	2	100	0	2	2	100
B029	78	T	C	C	TT	CC	CC	CC		CC	CC	TT	TC	CC	0	3	3	100	0	2	2	100	0	2	2	100	0	2	2	100
B029	95	T	C	C	TT	CC	CC	CC		CC	CC	TT	TC	CC	0	3	3	100	0	2	2	100	0	2	2	100	0	2	2	100
B029	116	A	C	A	AA	AA	AA	AA		AA	CC	AA	AC	CC	3	0	3	0	2	0	2	0	2	0	2	0	0	2	2	100
B029	119	T	C	C	TT	CC	CC	CC		CC	CC	TT	TC	CC	0	3	3	100	0	2	2	100	0	2	2	100	0	2	2	100
B029	134	T	C	C	TT	CC	CC	CC		CC	CC	TT	TC	CC	0	3	3	100	0	2	2	100	0	2	2	100	0	2	2	100
B029	146	G	A	G	GG	GG	GG	GG		GG	AA	GG	GA	AA	3	0	3	0	2	0	2	0	2	0	2	0	0	2	2	100
B029	152	A	G	A	AA	AA	AA	AA		GG	AA	AA	AG	GG	3	0	3	0	2	0	2	0	0	2	2	100	2	0	2	0
B029	179	A	G	G	AA	GG	GG	GG		GG	GG	AA	AG	GG	0	3	3	100	0	2	2	100	0	2	2	100	0	2	2	100
B030	60	G	A	A	GG	AA		GG		GG	GG	GG	GA	AA	0	1	1	100	2	0	2	0	2	0	2	0	2	0	2	0
B030	65	T	C	C	TT	CC		CC		CC	CC	TT	TC	CC	0	1	1	100	0	2	2	100	0	2	2	100	0	2	2	100
B030	75	T	C	C	TT	CC		CC		CC	CC	TT	TC	CC	0	1	1	100	0	2	2	100	0	2	2	100	0	2	2	100
B030	76	G	A	A	GG	AA		AA		AA	AA	GG	GA	AA	0	1	1	100	0	2	2	100	0	2	2	100	0	2	2	100
B030	82	A	G	G	AA	GG		GG		GG	GG	AA	AG	GG	0	1	1	100	0	2	2	100	0	2	2	100	0	2	2	100
B030	86	T	C	C	TT	CC		CC		CC	CC	TT	TC	CC	0	1	1	100	0	2	2	100	0	2	2	100	0	2	2	100
B030	100	C	T	T	CC	TT		TT		TT	TT	CC	CT	TT	0	1	1	100	0	2	2	100	0	2	2	100	0	2	2	100
B030	111	A	C	C	AA	CC		CC		CC	CC	AA	AC	CC	0	1	1	100	0	2	2	100	0	2	2	100	0	2	2	100
B030	113	C	A	A	CC	AA		AA		AA	AA	CC	CA	AA	0	1	1	100	0	2	2	100	0	2	2	100	0	2	2	100
B030	125	G	A	A	GG	AA		AA		AA	AA	GG	GA	AA	0	1	1	100	0	2	2	100	0	2	2	100	0	2	2	100
B030	135	C	T	T	CC	TT		TT		TT	TT	CC	CT	TT	0	1	1	100	0	2	2	100	0	2	2	100	0	2	2	100
B030	138	G	A	A	GG	AA		AA		AA	AA	GG	GA	AA	0	1	1	100	0	2	2	100	0	2	2	100	0	2	2	100
B030	140	C	G	C	CC	CC		GG		CC	CC	CC	CG	GG	1	0	1	0	0	2	2	100	2	0	2	0	2	0	2	0
B033	68	T	C	C	TT	CC	CC	CC		CC	CC	TT	TC	CC	0	3	3	100	0	2	2	100	0	2	2	100	0	2	2	100
B033	70	C	T	T	CC	TT	TT	TT		TT	TT	CC	CT	TT	0	3	3	100	0	2	2	100	0	2	2	100	0	2	2	100
B033	159	A	G	G	AA	GG	GG	GG		GG	GG	AA	AG	GG	0	3	3	100	0	2	2	100	0	2	2	100	0	2	2	100
B033	182	A	G	G	AA	GG	GG	GG		GG	GG	AA	AG	GG	0	3	3	100	0	2	2	100	0	2	2	100	0	2	2	100
B035	51	C	G	G	CC	GG	GG	GG		GG	GG	CC	CG	GG	0	3	3	100	0	2	2	100	0	2	2	100	0	2	2	100
B035	55	A	C	C	AA	CC	CC	CC		CC	CC	AA	AC	CC	0	3	3	100	0	2	2	100	0	2	2	100	0	2	2	100
B035	86	A	C	C	AA	CC	CC	CC		CC	CC	AA	AC	CC	0	3	3	100	0	2	2	100	0	2	2	100	0	2	2	100
B035	91	G	A	A	GG	AA	AA	AA		AA	AA	GG	GA	AA	0	3	3	100	0	2	2	100	0	2	2	100	0	2	2	100
B035	153	A	G	G	AA	GG	GG	GG		GG	GG	AA	AG	GG	0	3	3	100	0	2	2	100	0	2	2	100	0	2	2	100
B035	156	A	G	G	AA	GG	GG	GG		GG	GG	AA	AG	GG	0	3	3	100	0	2	2	100	0	2	2	100	0	2	2	100
B035	157	A	G	G	AA	GG	GG	GG		GG	GG	AA	AG	GG	0	3	3	100	0	2	2	100	0	2	2	100	0	2	2	100
B035	168	G	A	A	GG	AA	AA	AA		AA	AA	GG	GA	AA	0	3	3	100	0	2	2	100	0	2	2	100	0	2	2	100
B036	135	T	C	C	TT	CC	CC	CC		CC	CC	TT	TC	CC	0	3	3	100	0	2	2	100	0	2	2	100	0	2	2	100
B036	137	T	C	C	TT	CC	CC	CC		CC	CC	TT	TC	CC	0	3	3	100	0	2	2	100	0	2	2	100	0	2	2	100
B036	143	T	C	C	TT	CC	CC	CC		CC	CC	TT	TC	CC	0	3	3	100	0	2	2	100	0	2	2	100	0	2	2	100
B036	153	C	G	G	CC	GG	GG	CC		CC	CC	CC	CG	GG	0	3	3	100	2	0	2	0	2	0	2	0	2	0	2	0
B037	60	G	A	G	GG	GG	GG	GG		GG	GA	GG	GA	AA	3	0	3	0	2	0	2	0	2	0	2	0	1	1	2	50
B037	137	C	T	T	CC	TT	CC	CC		CC	CC	CC	CT	TT	2	1	3	33.3333	2	0	2	0	2	0	2	0	2	0	2	0
B037	183	C	T	C	CC	CC	CC	CC		TT	TT	CC	CT	TT	3	0	3	0	2	0	2	0	0	2	2	100	0	2	2	100
B038	46	T	C	C	TT	CC	CC	CC		CC	CC	TT	TC	CC	0	3	3	100	0	2	2	100	0	2	2	100	0	2	2	100
B038	66	T	C	C	TT	CC	CC	CC		CC	CC	TT	TC	CC	0	3	3	100	0	2	2	100	0	2	2	100	0	2	2	100
B038	85	T	C	C	TT	CC	CC	CC		CC	CC	TT	TC	CC	0	3	3	100	0	2	2	100	0	2	2	100	0	2	2	100
B038	126	G	A	G	GG	GG	GG	GG		AA	AA	GG	GA	AA	3	0	3	0	2	0	2	0	0	2	2	100	0	2	2	100
B038	173	A	G	G	AA	GG	GG	GG		GG	GG	AA	AG	GG	0	3	3	100	0	2	2	100	0	2	2	100	0	2	2	100
B038	175	A	G	G	AA	GG	GG	GG		GG	GG	AA	AG	GG	0	3	3	100	0	2	2	100	0	2	2	100	0	2	2	100
B040	43	T	C	C	TT	CC	CC	CC		CC	CC	TT	TC	CC	0	3	3	100	0	2	2	100	0	2	2	100	0	2	2	100
B040	74	T	C	C	TT	CC	CC	CC		CC	CC	TT	TC	CC	0	3	3	100	0	2	2	100	0	2	2	100	0	2	2	100
B040	111	T	C	T	TT	TT	TT	TT		CC	CC	TT	TC	CC	3	0	3	0	2	0	2	0	0	2	2	100	0	2	2	100
B040	168	C	T	T	CC	TT	TT	TT		CC	CC	CC	CT	TT	0	3	3	100	0	2	2	100	2	0	2	0	2	0	2	0
B041	49	G	C	C	GG	CC	CC	CC		CC	CC	GG	GC	CC	0	3	3	100	0	2	2	100	0	2	2	100	0	2	2	100
B041	54	A	G	G	AA	GG	GG	GG		GG	GG	AA	AG	GG	0	3	3	100	0	2	2	100	0	2	2	100	0	2	2	100
B041	106	A	G	G	AA	GG	GG	AA		AA	AA	AA	AG	GG	0	3	3	100	2	0	2	0	2	0	2	0	2	0	2	0
B041	158	C	T	C	CC	CC	CC	CC		TT	CC	CC	CT	TT	3	0	3	0	2	0	2	0	0	2	2	100	2	0	2	0
B044	121	A	G	A	AA	AA		AA		GG	AA	AA	AG	GG	1	0	1	0	2	0	2	0	0	2	2	100	2	0	2	0
B044	175	T	C	C	TT	CC		CC		CC	CC	TT	TC	CC	0	1	1	100	0	2	2	100	0	2	2	100	0	2	2	100
B045	148	A	G	G	AA	GG		GG		GG	GG	AA	AG	GG	0	1	1	100	0	2	2	100	0	2	2	100	0	2	2	100
B045	170	A	G	G	AA	GG		GG		GG	GG	AA	AG	GG	0	1	1	100	0	2	2	100	0	2	2	100	0	2	2	100
B048	108	T	C	C	TT	CC	CC	TC		TT	TT	TT	TC	CC	0	3	3	100	1	1	2	50	2	0	2	0	2	0	2	0
B050	62	T	C	C	TT	CC	CC	CC		CC	CC	TT	TC	CC	0	3	3	100	0	2	2	100	0	2	2	100	0	2	2	100
B050	64	T	C	C	TT	CC	CC	CC		CC	CC	TT	TC	CC	0	3	3	100	0	2	2	100	0	2	2	100	0	2	2	100
B050	71	T	C	C	TT	CC	CC	CC		CC	CC	TT	TC	CC	0	3	3	100	0	2	2	100	0	2	2	100	0	2	2	100
B050	95	T	C	C	TT	CC	CC	CC		CC	CC	TT	TC	CC	0	3	3	100	0	2	2	100	0	2	2	100	0	2	2	100
B050	105	G	C	G	GG	GG	GG	CC		GG	GG	GG	GC	CC	3	0	3	0	0	2	2	100	2	0	2	0	2	0	2	0
B050	125	G	A	A	GG	AA	AA	AA		AA	AA	GG	GA	AA	0	3	3	100	0	2	2	100	0	2	2	100	0	2	2	100
B050	130	C	T	T	CC	TT	TT	TT		TT	TT	CC	CT	TT	0	3	3	100	0	2	2	100	0	2	2	100	0	2	2	100
B050	139	A	G	G	AA	GG	GG	GG		GG	GG	AA	AG	GG	0	3	3	100	0	2	2	100	0	2	2	100	0	2	2	100
B050	152	C	T	T	CC	TT	TT	CC		TT	TT	CC	CT	TT	0	3	3	100	2	0	2	0	0	2	2	100	0	2	2	100
B050	183	T	G	G	TT	GG	GG	GG		GG	GG	TT	TG	GG	0	3	3	100	0	2	2	100	0	2	2	100	0	2	2	100
B050	184	A	C	C	AA	CC	CC	CC		CC	CC	AA	AC	CC	0	3	3	100	0	2	2	100	0	2	2	100	0	2	2	100
B054	68	T	G	G	TT	GG	GG	GG		GG	GG	TT	TG	GG	0	3	3	100	0	2	2	100	0	2	2	100	0	2	2	100
B054	69	T	C	C	TT	CC	CC	CC		CC	CC	TT	TC	CC	0	3	3	100	0	2	2	100	0	2	2	100	0	2	2	100
B054	70	A	T	T	AA	TT	TT	TT		TT	TT	AA	AT	TT	0	3	3	100	0	2	2	100	0	2	2	100	0	2	2	100
B054	93	A	C	C	AA	CC	CC	CC		AA	AA	AA	AC	CC	0	3	3	100	0	2	2	100	2	0	2	0	2	0	2	0
B054	138	G	A	A	GG	AA	AA	GG		GG	GG	GG	GA	AA	0	3	3	100	2	0	2	0	2	0	2	0	2	0	2	0
B054	142	C	T	T	CC	TT	TT	CC		CC	CC	CC	CT	TT	0	3	3	100	2	0	2	0	2	0	2	0	2	0	2	0
B054	183	G	A	A	GG	AA	AA	GG		GG	GG	GG	GA	AA	0	3	3	100	2	0	2	0	2	0	2	0	2	0	2	0
B054	187	A	G	G	AA	GG	GG	GG		GG	GG	AA	AG	GG	0	3	3	100	0	2	2	100	0	2	2	100	0	2	2	100
B054	188	A	G	G	AA	GG	GG	GG		GG	GG	AA	AG	GG	0	3	3	100	0	2	2	100	0	2	2	100	0	2	2	100
B055	142	T	G	G	TT	GG		TT		GG	GG	TT	TG	GG	0	1	1	100	2	0	2	0	0	2	2	100	0	2	2	100
B055	143	G	C	G	GG	GG		CC		GG	GG	GG	GC	CC	1	0	1	0	0	2	2	100	2	0	2	0	2	0	2	0
B056	48	G	C	C	GG	CC	CC	CC		CC	CC	GG	GC	CC	0	3	3	100	0	2	2	100	0	2	2	100	0	2	2	100
B056	72	T	G	G	TT	GG	GG	GG		GG	GG	TT	TG	GG	0	3	3	100	0	2	2	100	0	2	2	100	0	2	2	100
B056	81	C	G	C	CC	CC	CC	CC		GG	CC	CC	CG	GG	3	0	3	0	2	0	2	0	0	2	2	100	2	0	2	0
B056	95	A	G	G	AA	GG	GG	GG		GG	GG	AA	AG	GG	0	3	3	100	0	2	2	100	0	2	2	100	0	2	2	100
B056	96	A	G	A	AA	AA	AA	AA		AA	GG	AA	AG	GG	3	0	3	0	2	0	2	0	2	0	2	0	0	2	2	100
B056	127	T	C	C	TT	CC	CC	CC		CC	CC	TT	TC	CC	0	3	3	100	0	2	2	100	0	2	2	100	0	2	2	100
B056	144	A	G	G	AA	GG	GG	GG		GG	GG	AA	AG	GG	0	3	3	100	0	2	2	100	0	2	2	100	0	2	2	100
B057	59	C	T	C	CC	CC	CT	CC		CC	CC	CC	CT	TT	2	1	3	33.3333	2	0	2	0	2	0	2	0	2	0	2	0
B057	79	G	T	T	GG	TT	TT	TT		TT	TT	GG	GT	TT	0	3	3	100	0	2	2	100	0	2	2	100	0	2	2	100
B057	83	C	T	T	CC	TT	TT	TT		TT	TT	CC	CT	TT	0	3	3	100	0	2	2	100	0	2	2	100	0	2	2	100
B057	100	T	C	C	TT	CC	CC	CC		CC	CC	TT	TC	CC	0	3	3	100	0	2	2	100	0	2	2	100	0	2	2	100
B057	113	C	T	T	CC	TT	TT	TT		TT	TT	CC	CT	TT	0	3	3	100	0	2	2	100	0	2	2	100	0	2	2	100
B057	133	C	T	T	CC	TT	TT	TT		TT	TT	CC	CT	TT	0	3	3	100	0	2	2	100	0	2	2	100	0	2	2	100
B057	134	A	G	G	AA	GG	GG	GG		GG	GG	AA	AG	GG	0	3	3	100	0	2	2	100	0	2	2	100	0	2	2	100
B057	137	A	C	C	AA	CC	CC	CC		CC	CC	AA	AC	CC	0	3	3	100	0	2	2	100	0	2	2	100	0	2	2	100
B057	141	T	A	A	TT	AA	AA	AA		AA	AA	TT	TA	AA	0	3	3	100	0	2	2	100	0	2	2	100	0	2	2	100
B057	143	G	A	G	GG	GG	GG	AA		GG	GG	GG	GA	AA	3	0	3	0	0	2	2	100	2	0	2	0	2	0	2	0
B057	144	G	A	A	GG	AA	AA	AA		AA	AA	GG	GA	AA	0	3	3	100	0	2	2	100	0	2	2	100	0	2	2	100
B057	163	T	C	C	TT	CC	CC	CC		CC	CC	TT	TC	CC	0	3	3	100	0	2	2	100	0	2	2	100	0	2	2	100
B057	164	G	A	A	GG	AA	AA	AA		AA	AA	GG	GA	AA	0	3	3	100	0	2	2	100	0	2	2	100	0	2	2	100
B060	47	T	C	C	TT	CC	CC	CC		CC	CC	TT	TC	CC	0	3	3	100	0	2	2	100	0	2	2	100	0	2	2	100
B060	54	G	A	A	GG	AA	AA	AA		AA	AA	GG	GA	AA	0	3	3	100	0	2	2	100	0	2	2	100	0	2	2	100
B060	56	C	A	A	CC	AA	AA	AA		AA	AA	CC	CA	AA	0	3	3	100	0	2	2	100	0	2	2	100	0	2	2	100
B060	62	G	C	G	GG	GG	GG	GC		GG	GG	GG	GC	CC	3	0	3	0	1	1	2	50	2	0	2	0	2	0	2	0
B060	68	G	A	G	GG	GG	GG	GA		GG	GG	GG	GA	AA	3	0	3	0	1	1	2	50	2	0	2	0	2	0	2	0
B060	82	T	G	G	TT	GG	GG	GG		GG	GG	TT	TG	GG	0	3	3	100	0	2	2	100	0	2	2	100	0	2	2	100
B060	104	T	G	T	TT	TT	TT	TT		GG	TT	TT	TG	GG	3	0	3	0	2	0	2	0	0	2	2	100	2	0	2	0
B060	105	T	C	C	TT	CC	CC	CC		CC	CC	TT	TC	CC	0	3	3	100	0	2	2	100	0	2	2	100	0	2	2	100
B060	117	T	A	A	TT	AA	AA	AA		AA	AA	TT	TA	AA	0	3	3	100	0	2	2	100	0	2	2	100	0	2	2	100
B060	133	T	C	T	TT	TT	TT	TT		TT	CC	TT	TC	CC	3	0	3	0	2	0	2	0	2	0	2	0	0	2	2	100
B060	136	T	C	C	TT	CC	CC	CC		CC	CC	TT	TC	CC	0	3	3	100	0	2	2	100	0	2	2	100	0	2	2	100
B060	156	T	C	C	TT	CC	CC	CC		CC	CC	TT	TC	CC	0	3	3	100	0	2	2	100	0	2	2	100	0	2	2	100
B060	170	A	G	G	AA	GG	GG	GG		GG	GG	AA	AG	GG	0	3	3	100	0	2	2	100	0	2	2	100	0	2	2	100
B063	99	T	C	C	TT	CC		CC		CC	CC	TT	TC	CC	0	1	1	100	0	2	2	100	0	2	2	100	0	2	2	100
B063	138	A	G	A	AA	AA		AG		AA	AA	AA	AG	GG	1	0	1	0	1	1	2	50	2	0	2	0	2	0	2	0
B063	171	C	T	T	CC	TT		TT		TT	TT	CC	CT	TT	0	1	1	100	0	2	2	100	0	2	2	100	0	2	2	100
B081	78	C	T	T	CC	TT		TT		TT	TT	CC	CT	TT	0	1	1	100	0	2	2	100	0	2	2	100	0	2	2	100
B081	122	T	C	C	TT	CC		CC		CC	CC	TT	TC	CC	0	1	1	100	0	2	2	100	0	2	2	100	0	2	2	100
B081	139	A	C	A	AA	AA		AA		CC	CC	AA	AC	CC	1	0	1	0	2	0	2	0	0	2	2	100	0	2	2	100
B081	155	T	G	T	TT	TT		GG		TT	TT	TT	TG	GG	1	0	1	0	0	2	2	100	2	0	2	0	2	0	2	0
B081	178	C	T	T	CC	TT		TT		TT	TT	CC	CT	TT	0	1	1	100	0	2	2	100	0	2	2	100	0	2	2	100
B082	190	T	C	C	TT	CC	CC	CC		CC	CC	TT	TC	CC	0	3	3	100	0	2	2	100	0	2	2	100	0	2	2	100
B082	199	T	C	C	TT	CC	CC	CC		CC	CC	TT	TC	CC	0	3	3	100	0	2	2	100	0	2	2	100	0	2	2	100
B083	174	A	G	G	AA	GG	GG	GG		GG	GG	AA	AG	GG	0	3	3	100	0	2	2	100	0	2	2	100	0	2	2	100
B084	102	A	G	G	AA	GG	GG	GG		GG	GG	AA	AG	GG	0	3	3	100	0	2	2	100	0	2	2	100	0	2	2	100
B084	178	A	G	G	AA	GG	GG	GG		GG	GG	AA	AG	GG	0	3	3	100	0	2	2	100	0	2	2	100	0	2	2	100
B086	57	T	C	C	TT	CC	CC	CC		CC	CC	TT	TC	CC	0	3	3	100	0	2	2	100	0	2	2	100	0	2	2	100
B086	68	T	C	C	TT	CC	CC	CC		CC	CC	TT	TC	CC	0	3	3	100	0	2	2	100	0	2	2	100	0	2	2	100
B086	86	A	G	G	AA	GG	GG	GG		GG	GG	AA	AG	GG	0	3	3	100	0	2	2	100	0	2	2	100	0	2	2	100
B086	123	T	C	C	TT	CC	CC	TT		TT	TT	TT	TC	CC	0	3	3	100	2	0	2	0	2	0	2	0	2	0	2	0
B086	146	G	A	G	GG	GG	GG	GA		GG	GG	GG	GA	AA	3	0	3	0	1	1	2	50	2	0	2	0	2	0	2	0
B086	182	T	C	C	TT	CC	CC	CC		CC	CC	TT	TC	CC	0	3	3	100	0	2	2	100	0	2	2	100	0	2	2	100
B088	56	T	C	C	TT	CC	CC	CC		CC	CC	TT	TC	CC	0	3	3	100	0	2	2	100	0	2	2	100	0	2	2	100
B088	69	T	C	C	TT	CC	CC	CC		CC	CC	TT	TC	CC	0	3	3	100	0	2	2	100	0	2	2	100	0	2	2	100
B088	121	A	T	A	AA	AA	AA	AA		TT	AA	AA	AT	TT	3	0	3	0	2	0	2	0	0	2	2	100	2	0	2	0
B088	146	C	T	C	CC	CC	TT	CC		CC	CC	CC	CT	TT	1	2	3	66.6667	2	0	2	0	2	0	2	0	2	0	2	0
B088	160	T	C	C	TT	CC	CC	CC		CC	CC	TT	TC	CC	0	3	3	100	0	2	2	100	0	2	2	100	0	2	2	100
B088	166	A	C	C	AA	CC	CC	CC		CC	CC	AA	AC	CC	0	3	3	100	0	2	2	100	0	2	2	100	0	2	2	100
B090	110	A	G	G	AA	GG		GG		GG	GG	AA	AG	GG	0	1	1	100	0	2	2	100	0	2	2	100	0	2	2	100
B090	112	C	T	T	CC	TT		TT		TT	TT	CC	CT	TT	0	1	1	100	0	2	2	100	0	2	2	100	0	2	2	100
B090	114	G	C	C	GG	CC		CC		CC	CC	GG	GC	CC	0	1	1	100	0	2	2	100	0	2	2	100	0	2	2	100
B090	118	C	G	G	CC	GG		GG		GG	GG	CC	CG	GG	0	1	1	100	0	2	2	100	0	2	2	100	0	2	2	100
B090	154	C	T	C	CC	CC		CC		TT	CC	CC	CT	TT	1	0	1	0	2	0	2	0	0	2	2	100	2	0	2	0
B090	165	G	A	G	GG	GG		GG		GG	AA	GG	GA	AA	1	0	1	0	2	0	2	0	2	0	2	0	0	2	2	100
B090	167	A	G	G	AA	GG		GG		GG	GG	AA	AG	GG	0	1	1	100	0	2	2	100	0	2	2	100	0	2	2	100
B090	168	A	G	G	AA	GG		AA		GG	GG	AA	AG	GG	0	1	1	100	2	0	2	0	0	2	2	100	0	2	2	100
B090	170	A	G	G	AA	GG		GG		GG	GG	AA	AG	GG	0	1	1	100	0	2	2	100	0	2	2	100	0	2	2	100
B090	177	A	G	G	AA	GG		GG		GG	GG	AA	AG	GG	0	1	1	100	0	2	2	100	0	2	2	100	0	2	2	100
B091	94	A	G	G	AA	GG		GG		GG	GG	AA	AG	GG	0	1	1	100	0	2	2	100	0	2	2	100	0	2	2	100
B091	128	G	A	A	GG	AA		AA		AA	AA	GG	GA	AA	0	1	1	100	0	2	2	100	0	2	2	100	0	2	2	100
B091	146	A	G	G	AA	GG		GG		GG	GG	AA	AG	GG	0	1	1	100	0	2	2	100	0	2	2	100	0	2	2	100
B091	173	A	G	G	AA	GG		GG		GG	GG	AA	AG	GG	0	1	1	100	0	2	2	100	0	2	2	100	0	2	2	100
B091	178	A	G	G	AA	GG		GG		GG	GG	AA	AG	GG	0	1	1	100	0	2	2	100	0	2	2	100	0	2	2	100
B091	179	A	G	G	AA	GG		GG		GG	GG	AA	AG	GG	0	1	1	100	0	2	2	100	0	2	2	100	0	2	2	100
B092	53	T	A	A	TT	AA		AA		AA	AA	TT	TA	AA	0	1	1	100	0	2	2	100	0	2	2	100	0	2	2	100
B092	54	T	A	A	TT	AA		AA		AA	AA	TT	TA	AA	0	1	1	100	0	2	2	100	0	2	2	100	0	2	2	100
B092	55	T	A	A	TT	AA		AA		AA	AA	TT	TA	AA	0	1	1	100	0	2	2	100	0	2	2	100	0	2	2	100
B092	56	C	G	G	CC	GG		GG		GG	GG	CC	CG	GG	0	1	1	100	0	2	2	100	0	2	2	100	0	2	2	100
B092	58	C	A	A	CC	AA		AA		AA	AA	CC	CA	AA	0	1	1	100	0	2	2	100	0	2	2	100	0	2	2	100
B092	63	T	C	C	TT	CC		CC		CC	CC	TT	TC	CC	0	1	1	100	0	2	2	100	0	2	2	100	0	2	2	100
B092	65	A	G	G	AA	GG		GG		GG	GG	AA	AG	GG	0	1	1	100	0	2	2	100	0	2	2	100	0	2	2	100
B092	74	A	G	G	AA	GG		GG		GG	GG	AA	AG	GG	0	1	1	100	0	2	2	100	0	2	2	100	0	2	2	100
B092	80	A	C	C	AA	CC		CC		CC	CC	AA	AC	CC	0	1	1	100	0	2	2	100	0	2	2	100	0	2	2	100
B092	83	G	A	A	GG	AA		AA		GG	AA	GG	GA	AA	0	1	1	100	0	2	2	100	2	0	2	0	0	2	2	100
B092	99	T	C	C	TT	CC		CC		CC	CC	TT	TC	CC	0	1	1	100	0	2	2	100	0	2	2	100	0	2	2	100
B092	126	C	A	A	CC	AA		AA		AA	AA	CC	CA	AA	0	1	1	100	0	2	2	100	0	2	2	100	0	2	2	100
B092	137	A	G	G	AA	GG		GG		GG	GG	AA	AG	GG	0	1	1	100	0	2	2	100	0	2	2	100	0	2	2	100
B094	80	G	C	C	GG	CC	CC	CC		CC	CC	GG	GC	CC	0	3	3	100	0	2	2	100	0	2	2	100	0	2	2	100
B094	92	G	A	G	GG	GG	GA	GG		GG	GG	GG	GA	AA	2	1	3	33.3333	2	0	2	0	2	0	2	0	2	0	2	0
B094	107	T	A	A	TT	AA	AA	AA		AA	AA	TT	TA	AA	0	3	3	100	0	2	2	100	0	2	2	100	0	2	2	100
B094	115	T	C	C	TT	CC	CC	CC		CC	CC	TT	TC	CC	0	3	3	100	0	2	2	100	0	2	2	100	0	2	2	100
B094	117	T	C	C	TT	CC	CC	CC		CC	CC	TT	TC	CC	0	3	3	100	0	2	2	100	0	2	2	100	0	2	2	100
B094	123	T	C	C	TT	CC	CC	CC		CC	CC	TT	TC	CC	0	3	3	100	0	2	2	100	0	2	2	100	0	2	2	100
B094	127	T	C	C	TT	CC	CC	CC		CC	CC	TT	TC	CC	0	3	3	100	0	2	2	100	0	2	2	100	0	2	2	100
B094	145	T	C	C	TT	CC	CC	CC		CC	CC	TT	TC	CC	0	3	3	100	0	2	2	100	0	2	2	100	0	2	2	100
B094	166	A	C	C	AA	CC	CC	CC		CC	CC	AA	AC	CC	0	3	3	100	0	2	2	100	0	2	2	100	0	2	2	100
B094	168	G	C	C	GG	CC	CC	CC		CC	CC	GG	GC	CC	0	3	3	100	0	2	2	100	0	2	2	100	0	2	2	100
B094	177	G	C	C	GG	CC	CC	CC		CC	CC	GG	GC	CC	0	3	3	100	0	2	2	100	0	2	2	100	0	2	2	100
B094	179	T	A	A	TT	AA	AA	AA		AA	AA	TT	TA	AA	0	3	3	100	0	2	2	100	0	2	2	100	0	2	2	100
B094	194	G	C	C	GG	CC	CC	CC		CC	CC	GG	GC	CC	0	3	3	100	0	2	2	100	0	2	2	100	0	2	2	100
B094	196	T	A	A	TT	AA	AA	AA		AA	AA	TT	TA	AA	0	3	3	100	0	2	2	100	0	2	2	100	0	2	2	100
B096	74	T	G	G	TT	GG		GG		GG	GG	TT	TG	GG	0	1	1	100	0	2	2	100	0	2	2	100	0	2	2	100
B096	77	T	A	A	TT	AA		AA		AA	AA	TT	TA	AA	0	1	1	100	0	2	2	100	0	2	2	100	0	2	2	100
B096	80	G	T	T	GG	TT		TT		TT	TT	GG	GT	TT	0	1	1	100	0	2	2	100	0	2	2	100	0	2	2	100
B096	83	A	T	T	AA	TT		TT		TT	TT	AA	AT	TT	0	1	1	100	0	2	2	100	0	2	2	100	0	2	2	100
B096	85	A	C	C	AA	CC		CC		CC	CC	AA	AC	CC	0	1	1	100	0	2	2	100	0	2	2	100	0	2	2	100
B096	89	A	G	G	AA	GG		GG		GG	GG	AA	AG	GG	0	1	1	100	0	2	2	100	0	2	2	100	0	2	2	100
B096	91	A	G	G	AA	GG		GG		GG	GG	AA	AG	GG	0	1	1	100	0	2	2	100	0	2	2	100	0	2	2	100
B096	92	C	G	G	CC	GG		GG		GG	GG	CC	CG	GG	0	1	1	100	0	2	2	100	0	2	2	100	0	2	2	100
B096	93	G	A	A	GG	AA		AA		AA	AA	GG	GA	AA	0	1	1	100	0	2	2	100	0	2	2	100	0	2	2	100
B096	132	C	T	C	CC	CC		CC		TT	CC	CC	CT	TT	1	0	1	0	2	0	2	0	0	2	2	100	2	0	2	0
B096	137	A	G	G	AA	GG		GG		GG	GG	AA	AG	GG	0	1	1	100	0	2	2	100	0	2	2	100	0	2	2	100
B096	172	A	G	G	AA	GG		GG		GG	GG	AA	AG	GG	0	1	1	100	0	2	2	100	0	2	2	100	0	2	2	100
B096	173	A	G	G	AA	GG		GG		GG	GG	AA	AG	GG	0	1	1	100	0	2	2	100	0	2	2	100	0	2	2	100
B096	174	A	G	G	AA	GG		GG		GG	GG	AA	AG	GG	0	1	1	100	0	2	2	100	0	2	2	100	0	2	2	100
B096	192	C	T	T	CC	TT		TT		TT	TT	CC	CT	TT	0	1	1	100	0	2	2	100	0	2	2	100	0	2	2	100
B099	69	T	C	C	TT	CC	CC	CC		CC	CC	TT	TC	CC	0	3	3	100	0	2	2	100	0	2	2	100	0	2	2	100
B099	90	G	A	G	GG	GG	GG	GG		AA	GG	GG	GA	AA	3	0	3	0	2	0	2	0	0	2	2	100	2	0	2	0
B099	107	G	A	A	GG	AA	AA	AA		AA	AA	GG	GA	AA	0	3	3	100	0	2	2	100	0	2	2	100	0	2	2	100
B099	110	T	C	T	TT	TT	CC	CC		CC	CC	TT	TC	CC	1	2	3	66.6667	0	2	2	100	0	2	2	100	0	2	2	100
B099	151	T	C	C	TT	CC	CC	CC		CC	CC	TT	TC	CC	0	3	3	100	0	2	2	100	0	2	2	100	0	2	2	100
B099	157	T	C	C	TT	CC	CC	CC		CC	CC	TT	TC	CC	0	3	3	100	0	2	2	100	0	2	2	100	0	2	2	100
B099	164	T	C	C	TT	CC	CC	CC		CC	CC	TT	TC	CC	0	3	3	100	0	2	2	100	0	2	2	100	0	2	2	100
B099	182	A	G	G	AA	GG	GG	GG		GG	GG	AA	AG	GG	0	3	3	100	0	2	2	100	0	2	2	100	0	2	2	100
B099	184	A	G	G	AA	GG	GG	GG		GG	GG	AA	AG	GG	0	3	3	100	0	2	2	100	0	2	2	100	0	2	2	100
B100	79	C	T	C	CC	CC	CC	CT		CC	CC	CC	CT	TT	3	0	3	0	1	1	2	50	2	0	2	0	2	0	2	0
B100	176	A	G	G	AA	GG	GG	GG		GG	GG	AA	AG	GG	0	3	3	100	0	2	2	100	0	2	2	100	0	2	2	100
B100	178	A	G	G	AA	GG	GG	GG		GG	GG	AA	AG	GG	0	3	3	100	0	2	2	100	0	2	2	100	0	2	2	100
B101	50	T	C	C	TT	CC	CC	CC		CC	CC	TT	TC	CC	0	3	3	100	0	2	2	100	0	2	2	100	0	2	2	100
B101	84	C	T	T	CC	TT	TT	TT		TT	TT	CC	CT	TT	0	3	3	100	0	2	2	100	0	2	2	100	0	2	2	100
B101	106	A	G	G	AA	GG	GG	AA		AA	AA	AA	AG	GG	0	3	3	100	2	0	2	0	2	0	2	0	2	0	2	0
B101	116	C	T	T	CC	TT	TT	CT		CC	CC	CC	CT	TT	0	3	3	100	1	1	2	50	2	0	2	0	2	0	2	0
B101	117	G	A	G	GG	GG	GG	GG		AA	AA	GG	GA	AA	3	0	3	0	2	0	2	0	0	2	2	100	0	2	2	100
B102	83	T	G	T	TT	TT	TT	TT		GG	TT	TT	TG	GG	3	0	3	0	2	0	2	0	0	2	2	100	2	0	2	0
B102	121	G	A	G	GG	GG	GG	GG		AA	GG	GG	GA	AA	3	0	3	0	2	0	2	0	0	2	2	100	2	0	2	0
B102	126	G	A	A	GG	AA	AA	AA		AA	AA	GG	GA	AA	0	3	3	100	0	2	2	100	0	2	2	100	0	2	2	100
B102	131	A	G	G	AA	GG	GG	GG		GG	GG	AA	AG	GG	0	3	3	100	0	2	2	100	0	2	2	100	0	2	2	100
B102	148	G	A	G	GG	GG	GG	GG		AA	GG	GG	GA	AA	3	0	3	0	2	0	2	0	0	2	2	100	2	0	2	0
B102	174	G	A	A	GG	AA	AA	AA		AA	AA	GG	GA	AA	0	3	3	100	0	2	2	100	0	2	2	100	0	2	2	100
B105	62	T	C	C	TT	CC	CC	CC		CC	CC	TT	TC	CC	0	3	3	100	0	2	2	100	0	2	2	100	0	2	2	100
B105	65	T	C	C	TT	CC	CC	CC		CC	CC	TT	TC	CC	0	3	3	100	0	2	2	100	0	2	2	100	0	2	2	100
B105	162	A	G	G	AA	GG	GG	GG		GG	GG	AA	AG	GG	0	3	3	100	0	2	2	100	0	2	2	100	0	2	2	100
B106	70	C	T	C	CC	CC	CC	CC		TT	CC	CC	CT	TT	3	0	3	0	2	0	2	0	0	2	2	100	2	0	2	0
B106	131	A	G	G	AA	GG	GG	GG		GG	GG	AA	AG	GG	0	3	3	100	0	2	2	100	0	2	2	100	0	2	2	100
B106	133	A	G	G	AA	GG	GG	GG		GG	GG	AA	AG	GG	0	3	3	100	0	2	2	100	0	2	2	100	0	2	2	100
B106	134	A	G	G	AA	GG	GG	GG		GG	GG	AA	AG	GG	0	3	3	100	0	2	2	100	0	2	2	100	0	2	2	100
B106	135	A	G	G	AA	GG	GG	GG		GG	GG	AA	AG	GG	0	3	3	100	0	2	2	100	0	2	2	100	0	2	2	100
B106	149	A	G	G	AA	GG	GG	GG		GG	GG	AA	AG	GG	0	3	3	100	0	2	2	100	0	2	2	100	0	2	2	100
B106	163	A	G	G	AA	GG	GG	GG		GG	GG	AA	AG	GG	0	3	3	100	0	2	2	100	0	2	2	100	0	2	2	100
B106	166	A	G	G	AA	GG	GG	GG		GG	GG	AA	AG	GG	0	3	3	100	0	2	2	100	0	2	2	100	0	2	2	100
B107	63	T	C	C	TT	CC	CC	CC		CC	CC	TT	TC	CC	0	3	3	100	0	2	2	100	0	2	2	100	0	2	2	100
B107	64	T	C	C	TT	CC	CC	CC		CC	CC	TT	TC	CC	0	3	3	100	0	2	2	100	0	2	2	100	0	2	2	100
B107	67	T	C	C	TT	CC	CC	CC		CC	CC	TT	TC	CC	0	3	3	100	0	2	2	100	0	2	2	100	0	2	2	100
B107	74	A	G	G	AA	GG	GG	GG		GG	GG	AA	AG	GG	0	3	3	100	0	2	2	100	0	2	2	100	0	2	2	100
B107	101	G	A	G	GG	GG	GG	GA		GG	GG	GG	GA	AA	3	0	3	0	1	1	2	50	2	0	2	0	2	0	2	0
B107	120	T	C	C	TT	CC	CC	CC		CC	CC	TT	TC	CC	0	3	3	100	0	2	2	100	0	2	2	100	0	2	2	100
B107	121	T	C	C	TT	CC	CC	CC		CC	CC	TT	TC	CC	0	3	3	100	0	2	2	100	0	2	2	100	0	2	2	100
B107	159	T	A	A	TT	AA	AA	AA		AA	AA	TT	TA	AA	0	3	3	100	0	2	2	100	0	2	2	100	0	2	2	100
B107	162	G	T	T	GG	TT	TT	TT		TT	TT	GG	GT	TT	0	3	3	100	0	2	2	100	0	2	2	100	0	2	2	100
B107	165	A	C	A	AA	AA	AA	AC		AA	AA	AA	AC	CC	3	0	3	0	1	1	2	50	2	0	2	0	2	0	2	0
B107	168	C	A	A	CC	AA	AA	AA		AA	AA	CC	CA	AA	0	3	3	100	0	2	2	100	0	2	2	100	0	2	2	100
B107	171	C	G	G	CC	GG	GG	GG		GG	GG	CC	CG	GG	0	3	3	100	0	2	2	100	0	2	2	100	0	2	2	100
B109	133	T	C	C	TT	CC	CC	CC		CC	CC	TT	TC	CC	0	3	3	100	0	2	2	100	0	2	2	100	0	2	2	100
B109	137	G	A	G	GG	GG	GG	GG		AA	GG	GG	GA	AA	3	0	3	0	2	0	2	0	0	2	2	100	2	0	2	0
B109	139	G	A	A	GG	AA	AA	AA		AA	AA	GG	GA	AA	0	3	3	100	0	2	2	100	0	2	2	100	0	2	2	100
B109	141	G	C	C	GG	CC	CC	CC		CC	CC	GG	GC	CC	0	3	3	100	0	2	2	100	0	2	2	100	0	2	2	100
B109	142	G	A	A	GG	AA	AA	AA		AA	AA	GG	GA	AA	0	3	3	100	0	2	2	100	0	2	2	100	0	2	2	100
B109	145	G	T	T	GG	TT	TT	TT		TT	TT	GG	GT	TT	0	3	3	100	0	2	2	100	0	2	2	100	0	2	2	100
B109	150	T	G	G	TT	GG	GG	GG		GG	GG	TT	TG	GG	0	3	3	100	0	2	2	100	0	2	2	100	0	2	2	100
B109	152	T	A	A	TT	AA	AA	AA		AA	AA	TT	TA	AA	0	3	3	100	0	2	2	100	0	2	2	100	0	2	2	100
B109	153	T	G	G	TT	GG	GG	GG		GG	GG	TT	TG	GG	0	3	3	100	0	2	2	100	0	2	2	100	0	2	2	100
B109	154	T	C	C	TT	CC	CC	CC		CC	CC	TT	TC	CC	0	3	3	100	0	2	2	100	0	2	2	100	0	2	2	100
B109	156	T	G	G	TT	GG	GG	GG		GG	GG	TT	TG	GG	0	3	3	100	0	2	2	100	0	2	2	100	0	2	2	100
B109	182	C	A	A	CC	AA	AA	AA		AA	AA	CC	CA	AA	0	3	3	100	0	2	2	100	0	2	2	100	0	2	2	100
B109	184	T	C	C	TT	CC	CC	CC		CC	CC	TT	TC	CC	0	3	3	100	0	2	2	100	0	2	2	100	0	2	2	100
B111	57	G	C	G	GG	GG	GG	CC		GC	GG	GG	GC	CC	3	0	3	0	0	2	2	100	1	1	2	50	2	0	2	0
B111	59	A	G	A	AA	AA	AA	AA		AA	GG	AA	AG	GG	3	0	3	0	2	0	2	0	2	0	2	0	0	2	2	100
B111	108	T	C	T	TT	TT	TT	TT		TC	TT	TT	TC	CC	3	0	3	0	2	0	2	0	1	1	2	50	2	0	2	0
B111	120	A	G	G	AA	GG	GG	GG		AG	AA	AA	AG	GG	0	3	3	100	0	2	2	100	1	1	2	50	2	0	2	0
B111	124	G	A	G	GG	GG	GA	GG		GG	GG	GG	GA	AA	2	1	3	33.3333	2	0	2	0	2	0	2	0	2	0	2	0
B111	158	A	G	A	AA	AA	GG	AA		AA	AA	AA	AG	GG	1	2	3	66.6667	2	0	2	0	2	0	2	0	2	0	2	0
B112	76	T	C	C	TT	CC	CC	TT		CC	CC	TT	TC	CC	0	3	3	100	2	0	2	0	0	2	2	100	0	2	2	100
B112	93	A	T	T	AA	TT	TT	TT		TT	TT	AA	AT	TT	0	3	3	100	0	2	2	100	0	2	2	100	0	2	2	100
B112	113	A	G	G	AA	GG	GG	AA		AA	AA	AA	AG	GG	0	3	3	100	2	0	2	0	2	0	2	0	2	0	2	0
B112	129	A	G	G	AA	GG	GG	GG		GG	GG	AA	AG	GG	0	3	3	100	0	2	2	100	0	2	2	100	0	2	2	100
B112	154	C	T	T	CC	TT	TT	TT		CC	CC	CC	CT	TT	0	3	3	100	0	2	2	100	2	0	2	0	2	0	2	0
B112	157	A	G	G	AA	GG	GG	GG		GG	GG	AA	AG	GG	0	3	3	100	0	2	2	100	0	2	2	100	0	2	2	100
B112	160	A	G	G	AA	GG	GG	GG		GG	GG	AA	AG	GG	0	3	3	100	0	2	2	100	0	2	2	100	0	2	2	100
B112	162	A	G	G	AA	GG	GG	GG		GG	GG	AA	AG	GG	0	3	3	100	0	2	2	100	0	2	2	100	0	2	2	100
B112	170	A	G	G	AA	GG	GG	GG		GG	GG	AA	AG	GG	0	3	3	100	0	2	2	100	0	2	2	100	0	2	2	100
B114	58	A	T	T	AA	TT	TT	TT		TT	TT	AA	AT	TT	0	3	3	100	0	2	2	100	0	2	2	100	0	2	2	100
B114	60	G	A	A	GG	AA	AA	AA		AA	AA	GG	GA	AA	0	3	3	100	0	2	2	100	0	2	2	100	0	2	2	100
B114	72	C	T	T	CC	TT	TT	TT		TT	TT	CC	CT	TT	0	3	3	100	0	2	2	100	0	2	2	100	0	2	2	100
B114	82	C	T	T	CC	TT	TT	TT		TT	TT	CC	CT	TT	0	3	3	100	0	2	2	100	0	2	2	100	0	2	2	100
B114	105	T	C	C	TT	CC	CC	CC		CC	CC	TT	TC	CC	0	3	3	100	0	2	2	100	0	2	2	100	0	2	2	100
B114	113	T	A	A	TT	AA	AA	AA		AA	AA	TT	TA	AA	0	3	3	100	0	2	2	100	0	2	2	100	0	2	2	100
B114	115	T	C	C	TT	CC	CC	CC		CC	CC	TT	TC	CC	0	3	3	100	0	2	2	100	0	2	2	100	0	2	2	100
B114	118	A	G	G	AA	GG	GG	GG		GG	GG	AA	AG	GG	0	3	3	100	0	2	2	100	0	2	2	100	0	2	2	100
B114	129	C	G	C	CC	CC	CC	CC		GG	GG	CC	CG	GG	3	0	3	0	2	0	2	0	0	2	2	100	0	2	2	100
B114	142	A	G	G	AA	GG	GG	GG		GG	GG	AA	AG	GG	0	3	3	100	0	2	2	100	0	2	2	100	0	2	2	100
B114	150	T	G	G	TT	GG	GG	GG		GG	GG	TT	TG	GG	0	3	3	100	0	2	2	100	0	2	2	100	0	2	2	100
B114	152	T	C	T	TT	TT	TT	TC		CC	CC	TT	TC	CC	3	0	3	0	1	1	2	50	0	2	2	100	0	2	2	100
B116	47	T	C	C	TT	CC	CC	CC		CC	CC	TT	TC	CC	0	3	3	100	0	2	2	100	0	2	2	100	0	2	2	100
B116	48	T	C	C	TT	CC	CC	CC		CC	CC	TT	TC	CC	0	3	3	100	0	2	2	100	0	2	2	100	0	2	2	100
B116	51	T	C	C	TT	CC	CC	CC		CC	CC	TT	TC	CC	0	3	3	100	0	2	2	100	0	2	2	100	0	2	2	100
B116	52	T	C	C	TT	CC	CC	CC		CC	CC	TT	TC	CC	0	3	3	100	0	2	2	100	0	2	2	100	0	2	2	100
B116	142	A	G	A	AA	AA	AA	AG		AA	AA	AA	AG	GG	3	0	3	0	1	1	2	50	2	0	2	0	2	0	2	0
B116	177	A	T	T	AA	TT	TT	TT		TT	TT	AA	AT	TT	0	3	3	100	0	2	2	100	0	2	2	100	0	2	2	100
B118	98	A	C	C	AA	CC		CC		CC	CC	AA	AC	CC	0	1	1	100	0	2	2	100	0	2	2	100	0	2	2	100
B118	103	C	A	A	CC	AA		AA		AA	AA	CC	CA	AA	0	1	1	100	0	2	2	100	0	2	2	100	0	2	2	100
B118	180	A	G	G	AA	GG		GG		GG	GG	AA	AG	GG	0	1	1	100	0	2	2	100	0	2	2	100	0	2	2	100
B118	181	A	G	G	AA	GG		GG		GG	GG	AA	AG	GG	0	1	1	100	0	2	2	100	0	2	2	100	0	2	2	100
B120	76	G	C	C	GG	CC	CC	CC		CC	CC	GG	GC	CC	0	3	3	100	0	2	2	100	0	2	2	100	0	2	2	100
B120	145	G	C	C	GG	CC	CC	CC		CC	CC	GG	GC	CC	0	3	3	100	0	2	2	100	0	2	2	100	0	2	2	100
B120	154	A	G	G	AA	GG	GG	GG		GG	GG	AA	AG	GG	0	3	3	100	0	2	2	100	0	2	2	100	0	2	2	100
B120	169	A	G	A	AA	AA	AA	AA		GG	AA	AA	AG	GG	3	0	3	0	2	0	2	0	0	2	2	100	2	0	2	0
B120	173	A	G	G	AA	GG	GG	GG		GG	GG	AA	AG	GG	0	3	3	100	0	2	2	100	0	2	2	100	0	2	2	100
B121	65	G	C	C	GG	CC	CC	CC		CC	CC	GG	GC	CC	0	3	3	100	0	2	2	100	0	2	2	100	0	2	2	100
B121	94	A	G	G	AA	GG	GG	GG		GG	GG	AA	AG	GG	0	3	3	100	0	2	2	100	0	2	2	100	0	2	2	100
B121	112	G	A	G	GG	GG	GG	GG		AA	GG	GG	GA	AA	3	0	3	0	2	0	2	0	0	2	2	100	2	0	2	0
B121	129	G	C	G	GG	GG	GG	GG		GC	GG	GG	GC	CC	3	0	3	0	2	0	2	0	1	1	2	50	2	0	2	0
B121	167	A	G	G	AA	GG	GG	GG		GG	GG	AA	AG	GG	0	3	3	100	0	2	2	100	0	2	2	100	0	2	2	100
B121	168	A	G	G	AA	GG	GG	GG		GG	GG	AA	AG	GG	0	3	3	100	0	2	2	100	0	2	2	100	0	2	2	100
B122	57	T	C	C	TT	CC	CC	CC		CC	CC	TT	TC	CC	0	3	3	100	0	2	2	100	0	2	2	100	0	2	2	100
B122	85	C	T	T	CC	TT	TT	TT		TT	TT	CC	CT	TT	0	3	3	100	0	2	2	100	0	2	2	100	0	2	2	100
B122	88	T	G	G	TT	GG	GG	GG		GG	GG	TT	TG	GG	0	3	3	100	0	2	2	100	0	2	2	100	0	2	2	100
B122	158	T	C	C	TT	CC	TC	TT		TT	TT	TT	TC	CC	1	2	3	66.6667	2	0	2	0	2	0	2	0	2	0	2	0
B123	63	T	C	C	TT	CC	CC	CC		CC	CC	TT	TC	CC	0	3	3	100	0	2	2	100	0	2	2	100	0	2	2	100
B123	100	A	G	G	AA	GG	GG	GG		GG	GG	AA	AG	GG	0	3	3	100	0	2	2	100	0	2	2	100	0	2	2	100
B123	101	A	G	G	AA	GG	GG	GG		GG	GG	AA	AG	GG	0	3	3	100	0	2	2	100	0	2	2	100	0	2	2	100
B123	103	A	G	G	AA	GG	GG	GG		GG	GG	AA	AG	GG	0	3	3	100	0	2	2	100	0	2	2	100	0	2	2	100
B123	107	A	G	G	AA	GG	GG	GG		GG	GG	AA	AG	GG	0	3	3	100	0	2	2	100	0	2	2	100	0	2	2	100
B123	117	A	G	G	AA	GG	GG	GG		GG	GG	AA	AG	GG	0	3	3	100	0	2	2	100	0	2	2	100	0	2	2	100
B123	121	A	G	G	AA	GG	GG	GG		GG	GG	AA	AG	GG	0	3	3	100	0	2	2	100	0	2	2	100	0	2	2	100
B123	123	A	G	G	AA	GG	GG	GG		GG	GG	AA	AG	GG	0	3	3	100	0	2	2	100	0	2	2	100	0	2	2	100
B123	125	A	G	G	AA	GG	GG	GG		GG	GG	AA	AG	GG	0	3	3	100	0	2	2	100	0	2	2	100	0	2	2	100
B123	153	A	G	G	AA	GG	GG	GG		GG	GG	AA	AG	GG	0	3	3	100	0	2	2	100	0	2	2	100	0	2	2	100
B126	47	T	C	C	TT	CC	CC	CC		CC	CC	TT	TC	CC	0	3	3	100	0	2	2	100	0	2	2	100	0	2	2	100
B126	53	T	C	C	TT	CC	CC	CC		CC	CC	TT	TC	CC	0	3	3	100	0	2	2	100	0	2	2	100	0	2	2	100
B126	102	A	G	G	AA	GG	GG	GG		GG	GG	AA	AG	GG	0	3	3	100	0	2	2	100	0	2	2	100	0	2	2	100
B126	129	C	T	C	CC	CC	TT	CC		CC	CC	CC	CT	TT	1	2	3	66.6667	2	0	2	0	2	0	2	0	2	0	2	0
B126	130	A	G	G	AA	GG	GG	GG		AA	AA	AA	AG	GG	0	3	3	100	0	2	2	100	2	0	2	0	2	0	2	0
B126	139	G	C	C	GG	CC	GG	GG		GG	GG	GG	GC	CC	2	1	3	33.3333	2	0	2	0	2	0	2	0	2	0	2	0
B126	158	A	G	G	AA	GG	GG	GG		GG	GG	AA	AG	GG	0	3	3	100	0	2	2	100	0	2	2	100	0	2	2	100
B130	83	T	C	C	TT	CC	CC	CC		CC	CC	TT	TC	CC	0	3	3	100	0	2	2	100	0	2	2	100	0	2	2	100
B130	87	C	G	G	CC	GG	GG	GG		GG	GG	CC	CG	GG	0	3	3	100	0	2	2	100	0	2	2	100	0	2	2	100
B130	149	C	T	T	CC	TT	TT	TT		TT	TT	CC	CT	TT	0	3	3	100	0	2	2	100	0	2	2	100	0	2	2	100
B130	185	T	G	G	TT	GG	GG	GG		GG	GG	TT	TG	GG	0	3	3	100	0	2	2	100	0	2	2	100	0	2	2	100
B135	61	T	C	T	TT	TT	TT	TT		TC	TT	TT	TC	CC	3	0	3	0	2	0	2	0	1	1	2	50	2	0	2	0
B135	66	T	C	C	TT	CC	CC	CC		CC	CC	TT	TC	CC	0	3	3	100	0	2	2	100	0	2	2	100	0	2	2	100
B135	72	T	C	C	TT	CC	CC	CC		CC	CC	TT	TC	CC	0	3	3	100	0	2	2	100	0	2	2	100	0	2	2	100
B135	97	A	G	G	AA	GG	GG	GG		GG	GG	AA	AG	GG	0	3	3	100	0	2	2	100	0	2	2	100	0	2	2	100
B135	147	A	G	G	AA	GG	GG	GG		GG	GG	AA	AG	GG	0	3	3	100	0	2	2	100	0	2	2	100	0	2	2	100
B135	152	A	G	G	AA	GG	GG	GG		GG	GG	AA	AG	GG	0	3	3	100	0	2	2	100	0	2	2	100	0	2	2	100
B137	90	G	A	A	GG	AA	GG	GG		GG	GG	GG	GA	AA	2	1	3	33.3333	2	0	2	0	2	0	2	0	2	0	2	0
B137	146	G	A	G	GG	GG	GG	GA		GG	GG	GG	GA	AA	3	0	3	0	1	1	2	50	2	0	2	0	2	0	2	0
B137	162	A	G	G	AA	GG	GG	GG		GG	GG	AA	AG	GG	0	3	3	100	0	2	2	100	0	2	2	100	0	2	2	100
B137	166	G	A	G	GG	GG	GG	GG		GG	AA	GG	GA	AA	3	0	3	0	2	0	2	0	2	0	2	0	0	2	2	100
B140	59	C	T	T	CC	TT	TT	TT		TT	TT	CC	CT	TT	0	3	3	100	0	2	2	100	0	2	2	100	0	2	2	100
B140	99	C	T	C	CC	CC	CC	CC		CT	CC	CC	CT	TT	3	0	3	0	2	0	2	0	1	1	2	50	2	0	2	0
B141	64	A	T	T	AA	TT	TT	TT		TT	TT	AA	AT	TT	0	3	3	100	0	2	2	100	0	2	2	100	0	2	2	100
B141	68	C	T	T	CC	TT	TT	TT		TT	TT	CC	CT	TT	0	3	3	100	0	2	2	100	0	2	2	100	0	2	2	100
B141	95	C	G	G	CC	GG	CG	CG		GG	GG	CC	CG	GG	1	2	3	66.6667	1	1	2	50	0	2	2	100	0	2	2	100
B141	106	T	C	C	TT	CC	CC	CC		CC	CC	TT	TC	CC	0	3	3	100	0	2	2	100	0	2	2	100	0	2	2	100
B141	147	A	G	G	AA	GG	GG	GG		GG	GG	AA	AG	GG	0	3	3	100	0	2	2	100	0	2	2	100	0	2	2	100
B143	74	C	A	A	CC	AA	AA	AA		AA	AA	CC	CA	AA	0	3	3	100	0	2	2	100	0	2	2	100	0	2	2	100
B143	76	G	T	T	GG	TT	TT	TT		TT	TT	GG	GT	TT	0	3	3	100	0	2	2	100	0	2	2	100	0	2	2	100
B143	119	G	A	A	GG	AA	AA	AA		AA	AA	GG	GA	AA	0	3	3	100	0	2	2	100	0	2	2	100	0	2	2	100
B143	125	A	C	C	AA	CC	CC	CC		CC	CC	AA	AC	CC	0	3	3	100	0	2	2	100	0	2	2	100	0	2	2	100
B143	167	A	G	G	AA	GG	GG	GG		GG	GG	AA	AG	GG	0	3	3	100	0	2	2	100	0	2	2	100	0	2	2	100
B152	59	T	C	C	TT	CC	CC	CC		CC	CC	TT	TC	CC	0	3	3	100	0	2	2	100	0	2	2	100	0	2	2	100
B152	60	T	C	C	TT	CC	CC	CC		CC	CC	TT	TC	CC	0	3	3	100	0	2	2	100	0	2	2	100	0	2	2	100
B152	97	T	C	C	TT	CC	CC	CC		CC	CC	TT	TC	CC	0	3	3	100	0	2	2	100	0	2	2	100	0	2	2	100
B152	114	T	C	C	TT	CC	CC	CC		CC	CC	TT	TC	CC	0	3	3	100	0	2	2	100	0	2	2	100	0	2	2	100
B152	149	A	G	G	AA	GG	GG	GG		GG	GG	AA	AG	GG	0	3	3	100	0	2	2	100	0	2	2	100	0	2	2	100
B152	155	A	G	G	AA	GG	GG	GG		GG	GG	AA	AG	GG	0	3	3	100	0	2	2	100	0	2	2	100	0	2	2	100
B154	52	T	C	C	TT	CC	CC	CC		CC	CC	TT	TC	CC	0	3	3	100	0	2	2	100	0	2	2	100	0	2	2	100
B154	74	A	T	A	AA	AA	AA	AA		AT	AA	AA	AT	TT	3	0	3	0	2	0	2	0	1	1	2	50	2	0	2	0
B154	154	A	G	G	AA	GG	GG	GG		GG	GG	AA	AG	GG	0	3	3	100	0	2	2	100	0	2	2	100	0	2	2	100
B154	168	A	G	G	AA	GG	GG	GG		GG	GG	AA	AG	GG	0	3	3	100	0	2	2	100	0	2	2	100	0	2	2	100
B156	68	A	G	G	AA	GG	GG	GG		GG	GG	AA	AG	GG	0	3	3	100	0	2	2	100	0	2	2	100	0	2	2	100
B156	100	G	A	A	GG	AA	AA	AA		AA	AA	GG	GA	AA	0	3	3	100	0	2	2	100	0	2	2	100	0	2	2	100
B156	162	A	G	G	AA	GG	GG	GG		GG	GG	AA	AG	GG	0	3	3	100	0	2	2	100	0	2	2	100	0	2	2	100
B157	83	G	A	A	GG	AA	AA	AA		AA	AA	GG	GA	AA	0	3	3	100	0	2	2	100	0	2	2	100	0	2	2	100
B157	86	T	C	C	TT	CC	CC	CC		CC	CC	TT	TC	CC	0	3	3	100	0	2	2	100	0	2	2	100	0	2	2	100
B157	114	C	T	C	CC	CC	CC	CC		TT	CC	CC	CT	TT	3	0	3	0	2	0	2	0	0	2	2	100	2	0	2	0
B158	64	T	C	C	TT	CC	CC	CC		TT	TT	TT	TC	CC	0	3	3	100	0	2	2	100	2	0	2	0	2	0	2	0
B158	67	T	C	C	TT	CC	CC	CC		CC	CC	TT	TC	CC	0	3	3	100	0	2	2	100	0	2	2	100	0	2	2	100
B158	114	G	A	G	GG	GG	GG	GG		GG	AA	GG	GA	AA	3	0	3	0	2	0	2	0	2	0	2	0	0	2	2	100
B158	130	A	G	G	AA	GG	GG	GG		GG	GG	AA	AG	GG	0	3	3	100	0	2	2	100	0	2	2	100	0	2	2	100
B158	161	T	C	C	TT	CC	CC	CC		CC	CC	TT	TC	CC	0	3	3	100	0	2	2	100	0	2	2	100	0	2	2	100
B158	166	A	G	G	AA	GG	GG	GG		AA	AA	AA	AG	GG	0	3	3	100	0	2	2	100	2	0	2	0	2	0	2	0
B159	76	G	C	C	GG	CC	CC	CC		CC	CC	GG	GC	CC	0	3	3	100	0	2	2	100	0	2	2	100	0	2	2	100
B159	104	G	A	A	GG	AA	AA	AA		AA	AA	GG	GA	AA	0	3	3	100	0	2	2	100	0	2	2	100	0	2	2	100
B159	124	T	C	C	TT	CC	CC	CC		CC	CC	TT	TC	CC	0	3	3	100	0	2	2	100	0	2	2	100	0	2	2	100
B163	45	A	G	G	AA	GG	GG	GG		GG	GG	AA	AG	GG	0	3	3	100	0	2	2	100	0	2	2	100	0	2	2	100
B163	46	T	A	A	TT	AA	AA	AA		AA	AA	TT	TA	AA	0	3	3	100	0	2	2	100	0	2	2	100	0	2	2	100
B163	48	T	C	C	TT	CC	CC	CC		CC	CC	TT	TC	CC	0	3	3	100	0	2	2	100	0	2	2	100	0	2	2	100
B163	73	C	T	C	CC	CC	CC	CC		TT	CC	CC	CT	TT	3	0	3	0	2	0	2	0	0	2	2	100	2	0	2	0
B163	79	C	T	C	CC	CC	CC	CT		CC	CC	CC	CT	TT	3	0	3	0	1	1	2	50	2	0	2	0	2	0	2	0
B166	61	T	C	C	TT	CC	CC	CC		CC	CC	TT	TC	CC	0	3	3	100	0	2	2	100	0	2	2	100	0	2	2	100
B166	78	A	G	G	AA	GG	GG	GG		GG	GG	AA	AG	GG	0	3	3	100	0	2	2	100	0	2	2	100	0	2	2	100
B167	103	G	C	C	GG	CC	CC	CC		CC	CC	GG	GC	CC	0	3	3	100	0	2	2	100	0	2	2	100	0	2	2	100
B167	117	A	C	C	AA	CC	CC	CC		CC	CC	AA	AC	CC	0	3	3	100	0	2	2	100	0	2	2	100	0	2	2	100
B167	118	T	C	C	TT	CC	CC	CC		CC	CC	TT	TC	CC	0	3	3	100	0	2	2	100	0	2	2	100	0	2	2	100
B167	119	A	T	T	AA	TT	TT	TT		TT	TT	AA	AT	TT	0	3	3	100	0	2	2	100	0	2	2	100	0	2	2	100
B169	72	T	C	C	TT	CC	CC	CC		CC	CC	TT	TC	CC	0	3	3	100	0	2	2	100	0	2	2	100	0	2	2	100
B169	117	A	C	C	AA	CC	CC	CC		CC	CC	AA	AC	CC	0	3	3	100	0	2	2	100	0	2	2	100	0	2	2	100
B169	160	C	T	C	CC	CC	CC	CT		CC	CC	CC	CT	TT	3	0	3	0	1	1	2	50	2	0	2	0	2	0	2	0
B169	171	A	G	G	AA	GG	GG	GG		GG	GG	AA	AG	GG	0	3	3	100	0	2	2	100	0	2	2	100	0	2	2	100
B170	80	T	G	G	TT	GG	GG	TT		GG	TT	TT	TG	GG	0	3	3	100	2	0	2	0	0	2	2	100	2	0	2	0
B170	87	C	T	C	CC	CC	CC	TT		CC	TT	CC	CT	TT	3	0	3	0	0	2	2	100	2	0	2	0	0	2	2	100
B170	122	G	A	G	GG	GG	GG	GA		GG	GG	GG	GA	AA	3	0	3	0	1	1	2	50	2	0	2	0	2	0	2	0
B170	123	G	A	A	GG	AA	AA	GG		GG	GG	GG	GA	AA	0	3	3	100	2	0	2	0	2	0	2	0	2	0	2	0
B170	129	G	A	A	GG	AA	AA	AA		AA	AA	GG	GA	AA	0	3	3	100	0	2	2	100	0	2	2	100	0	2	2	100
B170	135	A	G	G	AA	GG	GG	GG		GG	GG	AA	AG	GG	0	3	3	100	0	2	2	100	0	2	2	100	0	2	2	100
B170	138	C	G	C	CC	CC	CG	CC		CC	CC	CC	CG	GG	2	1	3	33.3333	2	0	2	0	2	0	2	0	2	0	2	0
B171	73	T	G	T	TT	TT	TT	TT		TT	TG	TT	TG	GG	3	0	3	0	2	0	2	0	2	0	2	0	1	1	2	50
B171	81	C	T	C	CC	CC	CC	CC		TT	CC	CC	CT	TT	3	0	3	0	2	0	2	0	0	2	2	100	2	0	2	0
B171	107	T	C	C	TT	CC	CC	CC		CC	CC	TT	TC	CC	0	3	3	100	0	2	2	100	0	2	2	100	0	2	2	100
B171	109	C	T	C	CC	CC	CC	CC		CT	CC	CC	CT	TT	3	0	3	0	2	0	2	0	1	1	2	50	2	0	2	0
B171	152	A	G	G	AA	GG	GG	GG		GG	GG	AA	AG	GG	0	3	3	100	0	2	2	100	0	2	2	100	0	2	2	100
B172	73	A	G	G	AA	GG	GG	GG		GG	GG	AA	AG	GG	0	3	3	100	0	2	2	100	0	2	2	100	0	2	2	100
B172	96	A	G	A	AA	AA	AA	AA		GG	AA	AA	AG	GG	3	0	3	0	2	0	2	0	0	2	2	100	2	0	2	0
B172	130	A	G	G	AA	GG	GG	GG		GG	GG	AA	AG	GG	0	3	3	100	0	2	2	100	0	2	2	100	0	2	2	100
B174	94	C	T	C	CC	CC	CC	CC		TT	TT	CC	CT	TT	3	0	3	0	2	0	2	0	0	2	2	100	0	2	2	100
B175	52	C	T	C	CC	CC	CC	CC		CT	TT	CC	CT	TT	3	0	3	0	2	0	2	0	1	1	2	50	0	2	2	100
B175	95	G	A	G	GG	GG	GG	GG		GA	GG	GG	GA	AA	3	0	3	0	2	0	2	0	1	1	2	50	2	0	2	0
B175	120	G	T	T	GG	TT	TT	TT		GG	GG	GG	GT	TT	0	3	3	100	0	2	2	100	2	0	2	0	2	0	2	0
B176	74	T	C	C	TT	CC	CC	CC		CC	CC	TT	TC	CC	0	3	3	100	0	2	2	100	0	2	2	100	0	2	2	100
B176	78	T	G	G	TT	GG	GG	GG		GG	GG	TT	TG	GG	0	3	3	100	0	2	2	100	0	2	2	100	0	2	2	100
B176	135	C	T	T	CC	TT	TT	TT		TT	TT	CC	CT	TT	0	3	3	100	0	2	2	100	0	2	2	100	0	2	2	100
B176	156	G	A	G	GG	GG	GG	GG		GG	AA	GG	GA	AA	3	0	3	0	2	0	2	0	2	0	2	0	0	2	2	100
B176	179	C	A	C	CC	CC	CC	CC		CC	CA	CC	CA	AA	3	0	3	0	2	0	2	0	2	0	2	0	1	1	2	50
B176	182	G	A	G	GG	GG	GG	GA		GG	GG	GG	GA	AA	3	0	3	0	1	1	2	50	2	0	2	0	2	0	2	0
B176	185	A	G	G	AA	GG	GG	GG		GG	GG	AA	AG	GG	0	3	3	100	0	2	2	100	0	2	2	100	0	2	2	100
B178	101	A	G	G	AA	GG	GG	GG		GG	GG	AA	AG	GG	0	3	3	100	0	2	2	100	0	2	2	100	0	2	2	100
B178	102	T	G	G	TT	GG	GG	GG		TT	TT	TT	TG	GG	0	3	3	100	0	2	2	100	2	0	2	0	2	0	2	0
B179	80	G	C	C	GG	CC	CC	CC		CC	CC	GG	GC	CC	0	3	3	100	0	2	2	100	0	2	2	100	0	2	2	100
B179	116	C	T	C	CC	CC	CC	CT		CC	CC	CC	CT	TT	3	0	3	0	1	1	2	50	2	0	2	0	2	0	2	0
B179	155	T	C	C	TT	CC	CC	CC		CC	CC	TT	TC	CC	0	3	3	100	0	2	2	100	0	2	2	100	0	2	2	100
B180	100	A	C	C	AA	CC	CC	AA		AA	AA	AA	AC	CC	0	3	3	100	2	0	2	0	2	0	2	0	2	0	2	0
B180	123	G	A	G	GG	GG	GG	GG		AA	GG	GG	GA	AA	3	0	3	0	2	0	2	0	0	2	2	100	2	0	2	0
B180	127	T	C	C	TT	CC	CC	CC		CC	CC	TT	TC	CC	0	3	3	100	0	2	2	100	0	2	2	100	0	2	2	100
B180	172	A	G	G	AA	GG	GG	GG		GG	GG	AA	AG	GG	0	3	3	100	0	2	2	100	0	2	2	100	0	2	2	100
B181	79	T	G	G	TT	GG	GG	GG		GG	GG	TT	TG	GG	0	3	3	100	0	2	2	100	0	2	2	100	0	2	2	100
B181	93	G	A	A	GG	AA	AA	AA		AA	AA	GG	GA	AA	0	3	3	100	0	2	2	100	0	2	2	100	0	2	2	100
B181	109	G	A	A	GG	AA	AA	AA		AA	AA	GG	GA	AA	0	3	3	100	0	2	2	100	0	2	2	100	0	2	2	100
B181	113	T	C	C	TT	CC	CC	CC		CC	CC	TT	TC	CC	0	3	3	100	0	2	2	100	0	2	2	100	0	2	2	100
B181	127	A	C	A	AA	AA	AA	AA		AC	AA	AA	AC	CC	3	0	3	0	2	0	2	0	1	1	2	50	2	0	2	0
B181	137	G	A	A	GG	AA	AA	GA		GG	GG	GG	GA	AA	0	3	3	100	1	1	2	50	2	0	2	0	2	0	2	0
B181	160	A	G	G	AA	GG	GG	GG		GG	GG	AA	AG	GG	0	3	3	100	0	2	2	100	0	2	2	100	0	2	2	100
B181	163	A	G	G	AA	GG	GG	GG		GG	GG	AA	AG	GG	0	3	3	100	0	2	2	100	0	2	2	100	0	2	2	100
B184	61	T	G	G	TT	GG	GG	GG		GG	GG	TT	TG	GG	0	3	3	100	0	2	2	100	0	2	2	100	0	2	2	100
B184	64	T	C	C	TT	CC	CC	CC		CC	CC	TT	TC	CC	0	3	3	100	0	2	2	100	0	2	2	100	0	2	2	100
B184	65	T	C	C	TT	CC	CC	CC		CC	CC	TT	TC	CC	0	3	3	100	0	2	2	100	0	2	2	100	0	2	2	100
B184	76	T	C	C	TT	CC	CC	CC		CC	CC	TT	TC	CC	0	3	3	100	0	2	2	100	0	2	2	100	0	2	2	100
B184	78	T	C	C	TT	CC	CC	CC		CC	CC	TT	TC	CC	0	3	3	100	0	2	2	100	0	2	2	100	0	2	2	100
B184	132	A	G	A	AA	AA	AG	AA		AA	AA	AA	AG	GG	2	1	3	33.3333	2	0	2	0	2	0	2	0	2	0	2	0
B184	160	T	C	C	TT	CC	CC	CC		CC	CC	TT	TC	CC	0	3	3	100	0	2	2	100	0	2	2	100	0	2	2	100
B187	63	G	A	G	GG	GG		GA		GG	GG	GG	GA	AA	1	0	1	0	1	1	2	50	2	0	2	0	2	0	2	0
B187	98	G	C	G	GG	GG		GG		GC	GG	GG	GC	CC	1	0	1	0	2	0	2	0	1	1	2	50	2	0	2	0
B187	109	G	A	G	GG	GG		GA		GG	GG	GG	GA	AA	1	0	1	0	1	1	2	50	2	0	2	0	2	0	2	0
B187	115	A	G	G	AA	GG		GG		GG	GG	AA	AG	GG	0	1	1	100	0	2	2	100	0	2	2	100	0	2	2	100
B187	124	A	G	G	AA	GG		GG		GG	GG	AA	AG	GG	0	1	1	100	0	2	2	100	0	2	2	100	0	2	2	100
B187	141	A	G	G	AA	GG		GG		GG	GG	AA	AG	GG	0	1	1	100	0	2	2	100	0	2	2	100	0	2	2	100
B187	159	A	G	G	AA	GG		GG		GG	GG	AA	AG	GG	0	1	1	100	0	2	2	100	0	2	2	100	0	2	2	100
B188	73	A	T	T	AA	TT	TT	TT		TT	TT	AA	AT	TT	0	3	3	100	0	2	2	100	0	2	2	100	0	2	2	100
B189	50	T	C	C	TT	CC	CC	CC		CC	CC	TT	TC	CC	0	3	3	100	0	2	2	100	0	2	2	100	0	2	2	100
B189	53	G	A	G	GG	GG	GG	GG		GG	AA	GG	GA	AA	3	0	3	0	2	0	2	0	2	0	2	0	0	2	2	100
B189	68	G	A	G	GG	GG	GG	GG		GG	AA	GG	GA	AA	3	0	3	0	2	0	2	0	2	0	2	0	0	2	2	100
B189	114	C	A	C	CC	CC	CC	CC		CC	AA	CC	CA	AA	3	0	3	0	2	0	2	0	2	0	2	0	0	2	2	100
B191	48	T	C	C	TT	CC	CC	CC		CC	CC	TT	TC	CC	0	3	3	100	0	2	2	100	0	2	2	100	0	2	2	100
B191	54	C	T	T	CC	TT	TT	TT		TT	TT	CC	CT	TT	0	3	3	100	0	2	2	100	0	2	2	100	0	2	2	100
B191	71	G	C	G	GG	GG	GG	GG		GC	GG	GG	GC	CC	3	0	3	0	2	0	2	0	1	1	2	50	2	0	2	0
B191	90	C	T	C	CC	CC	CC	CC		CT	CC	CC	CT	TT	3	0	3	0	2	0	2	0	1	1	2	50	2	0	2	0
B191	124	T	A	A	TT	AA	AA	AA		TT	TT	TT	TA	AA	0	3	3	100	0	2	2	100	2	0	2	0	2	0	2	0
B191	155	A	G	G	AA	GG	GG	GG		GG	GG	AA	AG	GG	0	3	3	100	0	2	2	100	0	2	2	100	0	2	2	100
B192	70	C	G	C	CC	CC	CC	CC		CG	CC	CC	CG	GG	3	0	3	0	2	0	2	0	1	1	2	50	2	0	2	0
B192	98	C	T	C	CC	CC	CC	CC		CC	TT	CC	CT	TT	3	0	3	0	2	0	2	0	2	0	2	0	0	2	2	100
B192	99	G	A	G	GG	GG	GG	GG		GA	GG	GG	GA	AA	3	0	3	0	2	0	2	0	1	1	2	50	2	0	2	0
B193	42	G	A	A	GG	AA	AA	AA		AA	AA	GG	GA	AA	0	3	3	100	0	2	2	100	0	2	2	100	0	2	2	100
B193	43	T	C	C	TT	CC	CC	CC		CC	CC	TT	TC	CC	0	3	3	100	0	2	2	100	0	2	2	100	0	2	2	100
B193	54	A	G	G	AA	GG	GG	GG		GG	GG	AA	AG	GG	0	3	3	100	0	2	2	100	0	2	2	100	0	2	2	100
B193	81	T	C	C	TT	CC	CC	CC		CC	CC	TT	TC	CC	0	3	3	100	0	2	2	100	0	2	2	100	0	2	2	100
B193	87	G	C	C	GG	CC	CC	CC		CC	CC	GG	GC	CC	0	3	3	100	0	2	2	100	0	2	2	100	0	2	2	100
B193	101	C	T	T	CC	TT	TT	TT		TT	TT	CC	CT	TT	0	3	3	100	0	2	2	100	0	2	2	100	0	2	2	100
B194	40	T	A	A	TT	AA	AA	AA		AA	AA	TT	TA	AA	0	3	3	100	0	2	2	100	0	2	2	100	0	2	2	100
B194	41	C	T	T	CC	TT	TT	TT		TT	TT	CC	CT	TT	0	3	3	100	0	2	2	100	0	2	2	100	0	2	2	100
B194	44	T	C	C	TT	CC	CC	CC		CC	CC	TT	TC	CC	0	3	3	100	0	2	2	100	0	2	2	100	0	2	2	100
B194	53	T	C	T	TT	TT	TT	TT		CC	TT	TT	TC	CC	3	0	3	0	2	0	2	0	0	2	2	100	2	0	2	0
B194	57	A	G	G	AA	GG	GG	GG		GG	GG	AA	AG	GG	0	3	3	100	0	2	2	100	0	2	2	100	0	2	2	100
B194	69	A	G	G	AA	GG	GG	GG		GG	GG	AA	AG	GG	0	3	3	100	0	2	2	100	0	2	2	100	0	2	2	100
B194	74	G	A	A	GG	AA	AA	AA		AA	AA	GG	GA	AA	0	3	3	100	0	2	2	100	0	2	2	100	0	2	2	100
B194	80	T	A	A	TT	AA	AA	AA		AA	AA	TT	TA	AA	0	3	3	100	0	2	2	100	0	2	2	100	0	2	2	100
B194	109	T	C	T	TT	TT	TT	TC		TT	TT	TT	TC	CC	3	0	3	0	1	1	2	50	2	0	2	0	2	0	2	0
B194	126	A	C	C	AA	CC	CC	CC		CC	CC	AA	AC	CC	0	3	3	100	0	2	2	100	0	2	2	100	0	2	2	100
B194	130	G	A	A	GG	AA	AA	AA		AA	AA	GG	GA	AA	0	3	3	100	0	2	2	100	0	2	2	100	0	2	2	100
B194	141	G	C	C	GG	CC	CC	CC		CC	CC	GG	GC	CC	0	3	3	100	0	2	2	100	0	2	2	100	0	2	2	100
B195	51	T	C	T	TT	TT	TT	TT		TT	TC	TT	TC	CC	3	0	3	0	2	0	2	0	2	0	2	0	1	1	2	50
B195	118	G	A	G	GG	GG	GG	GG		GA	GG	GG	GA	AA	3	0	3	0	2	0	2	0	1	1	2	50	2	0	2	0
B196	62	T	C	C	TT	CC	CC	CC		CC	CC	TT	TC	CC	0	3	3	100	0	2	2	100	0	2	2	100	0	2	2	100
B196	63	T	C	C	TT	CC	CC	CC		CC	CC	TT	TC	CC	0	3	3	100	0	2	2	100	0	2	2	100	0	2	2	100
B196	64	T	C	C	TT	CC	CC	CC		CC	CC	TT	TC	CC	0	3	3	100	0	2	2	100	0	2	2	100	0	2	2	100
B196	66	T	C	C	TT	CC	CC	CC		CC	CC	TT	TC	CC	0	3	3	100	0	2	2	100	0	2	2	100	0	2	2	100
B196	81	G	A	G	GG	GG	GG	AA		GG	GG	GG	GA	AA	3	0	3	0	0	2	2	100	2	0	2	0	2	0	2	0
B196	119	G	A	A	GG	AA	AA	GG		GG	GG	GG	GA	AA	0	3	3	100	2	0	2	0	2	0	2	0	2	0	2	0
B197	68	T	C	C	TT	CC	CC	CC		CC	CC	TT	TC	CC	0	3	3	100	0	2	2	100	0	2	2	100	0	2	2	100
B197	97	A	G	G	AA	GG	GG	GG		GG	GG	AA	AG	GG	0	3	3	100	0	2	2	100	0	2	2	100	0	2	2	100
B197	98	A	G	G	AA	GG	GG	GG		GG	GG	AA	AG	GG	0	3	3	100	0	2	2	100	0	2	2	100	0	2	2	100
B197	135	C	T	C	CC	CC	CC	CT		CC	CC	CC	CT	TT	3	0	3	0	1	1	2	50	2	0	2	0	2	0	2	0
B197	148	A	G	G	AA	GG	GG	GG		GG	GG	AA	AG	GG	0	3	3	100	0	2	2	100	0	2	2	100	0	2	2	100
B197	151	A	G	G	AA	GG	GG	GG		GG	GG	AA	AG	GG	0	3	3	100	0	2	2	100	0	2	2	100	0	2	2	100
B198	47	T	C	T	TT	TT	TT	TT		CC	CC	TT	TC	CC	3	0	3	0	2	0	2	0	0	2	2	100	0	2	2	100
B198	51	A	C	A	AA	AA	AA	AC		AA	AA	AA	AC	CC	3	0	3	0	1	1	2	50	2	0	2	0	2	0	2	0
B200	110	G	C	C	GG	CC	CC	CC		CC	CC	GG	GC	CC	0	3	3	100	0	2	2	100	0	2	2	100	0	2	2	100
B200	124	T	C	T	TT	TT	TT	TT		TT	TC	TT	TC	CC	3	0	3	0	2	0	2	0	2	0	2	0	1	1	2	50
B200	128	A	C	C	AA	CC	CC	CC		CC	CC	AA	AC	CC	0	3	3	100	0	2	2	100	0	2	2	100	0	2	2	100
B200	130	A	G	G	AA	GG	GG	GG		GG	GG	AA	AG	GG	0	3	3	100	0	2	2	100	0	2	2	100	0	2	2	100
B203	64	A	G	G	AA	GG	GG	GG		GG	GG	AA	AG	GG	0	3	3	100	0	2	2	100	0	2	2	100	0	2	2	100
B203	109	G	T	T	GG	TT	TT	TT		TT	TT	GG	GT	TT	0	3	3	100	0	2	2	100	0	2	2	100	0	2	2	100
B205	67	C	T	C	CC	CC	CC	CC		TT	CC	CC	CT	TT	3	0	3	0	2	0	2	0	0	2	2	100	2	0	2	0
B205	68	A	G	G	AA	GG	GG	GG		GG	GG	AA	AG	GG	0	3	3	100	0	2	2	100	0	2	2	100	0	2	2	100
B205	127	C	A	C	CC	CC	CC	CC		AA	CC	CC	CA	AA	3	0	3	0	2	0	2	0	0	2	2	100	2	0	2	0
B205	139	T	C	C	TT	CC	CC	CC		CC	CC	TT	TC	CC	0	3	3	100	0	2	2	100	0	2	2	100	0	2	2	100
B207	68	T	C	C	TT	CC	CC	CC		CC	CC	TT	TC	CC	0	3	3	100	0	2	2	100	0	2	2	100	0	2	2	100
B207	73	G	A	G	GG	GG	GG	GG		AA	GG	GG	GA	AA	3	0	3	0	2	0	2	0	0	2	2	100	2	0	2	0
B207	108	G	A	A	GG	AA	AA	AA		AA	AA	GG	GA	AA	0	3	3	100	0	2	2	100	0	2	2	100	0	2	2	100
B207	109	T	C	C	TT	CC	CC	CC		CC	CC	TT	TC	CC	0	3	3	100	0	2	2	100	0	2	2	100	0	2	2	100
B207	125	C	A	A	CC	AA	AA	AA		CC	CC	CC	CA	AA	0	3	3	100	0	2	2	100	2	0	2	0	2	0	2	0
B207	140	T	C	C	TT	CC	CC	CC		CC	CC	TT	TC	CC	0	3	3	100	0	2	2	100	0	2	2	100	0	2	2	100
B207	144	G	A	A	GG	AA	AA	AA		GG	GG	GG	GA	AA	0	3	3	100	0	2	2	100	2	0	2	0	2	0	2	0
B207	147	T	C	C	TT	CC	CC	CC		CC	CC	TT	TC	CC	0	3	3	100	0	2	2	100	0	2	2	100	0	2	2	100
B207	162	A	G	G	AA	GG	GG	GG		GG	GG	AA	AG	GG	0	3	3	100	0	2	2	100	0	2	2	100	0	2	2	100
B209	47	T	C	C	TT	CC	CC	CC		CC	CC	TT	TC	CC	0	3	3	100	0	2	2	100	0	2	2	100	0	2	2	100
B209	49	T	C	C	TT	CC	CC	CC		CC	CC	TT	TC	CC	0	3	3	100	0	2	2	100	0	2	2	100	0	2	2	100
B209	50	T	C	T	TT	TT	CC	CC		CC	CC	TT	TC	CC	1	2	3	66.6667	0	2	2	100	0	2	2	100	0	2	2	100
B209	52	A	G	G	AA	GG	GG	GG		GG	GG	AA	AG	GG	0	3	3	100	0	2	2	100	0	2	2	100	0	2	2	100
B209	57	T	C	C	TT	CC	CC	CC		CC	CC	TT	TC	CC	0	3	3	100	0	2	2	100	0	2	2	100	0	2	2	100
B209	58	T	C	C	TT	CC	CC	CC		CC	CC	TT	TC	CC	0	3	3	100	0	2	2	100	0	2	2	100	0	2	2	100
B210	139	T	C	C	TT	CC	CC	CC		CC	CC	TT	TC	CC	0	3	3	100	0	2	2	100	0	2	2	100	0	2	2	100
B210	171	G	A	G	GG	GG	GG	GA		GG	GG	GG	GA	AA	3	0	3	0	1	1	2	50	2	0	2	0	2	0	2	0
B211	111	C	A	C	CC	CC	CC	AA		AA	AA	CC	CA	AA	3	0	3	0	0	2	2	100	0	2	2	100	0	2	2	100
B211	164	T	G	G	TT	GG	GG	TT		GG	GG	TT	TG	GG	0	3	3	100	2	0	2	0	0	2	2	100	0	2	2	100
B212	89	T	C	C	TT	CC	CC	CC		CC	CC	TT	TC	CC	0	3	3	100	0	2	2	100	0	2	2	100	0	2	2	100
B212	90	T	C	C	TT	CC	CC	CC		CC	CC	TT	TC	CC	0	3	3	100	0	2	2	100	0	2	2	100	0	2	2	100
B212	147	T	C	C	TT	CC	CC	CC		CC	CC	TT	TC	CC	0	3	3	100	0	2	2	100	0	2	2	100	0	2	2	100
B212	153	T	C	C	TT	CC	CC	TT		TT	TT	TT	TC	CC	0	3	3	100	2	0	2	0	2	0	2	0	2	0	2	0
B214	67	T	C	C	TT	CC	CC	CC		CC	CC	TT	TC	CC	0	3	3	100	0	2	2	100	0	2	2	100	0	2	2	100
B214	81	A	C	C	AA	CC	AC	AA		AA	AA	AA	AC	CC	1	2	3	66.6667	2	0	2	0	2	0	2	0	2	0	2	0
B214	85	T	C	T	TT	TT	TT	TT		TT	CC	TT	TC	CC	3	0	3	0	2	0	2	0	2	0	2	0	0	2	2	100
B214	143	C	G	G	CC	GG	GG	GG		GG	GG	CC	CG	GG	0	3	3	100	0	2	2	100	0	2	2	100	0	2	2	100
B214	144	G	C	C	GG	CC	CC	CC		CC	CC	GG	GC	CC	0	3	3	100	0	2	2	100	0	2	2	100	0	2	2	100
B215	68	T	C	C	TT	CC	CC	CC		CC	CC	TT	TC	CC	0	3	3	100	0	2	2	100	0	2	2	100	0	2	2	100
B215	90	T	C	T	TT	TT	TT	TT		TT	TC	TT	TC	CC	3	0	3	0	2	0	2	0	2	0	2	0	1	1	2	50
B215	94	C	T	T	CC	TT	TT	CC		CC	CC	CC	CT	TT	0	3	3	100	2	0	2	0	2	0	2	0	2	0	2	0
B215	112	A	G	G	AA	GG	GG	GG		GG	GG	AA	AG	GG	0	3	3	100	0	2	2	100	0	2	2	100	0	2	2	100
B215	152	A	G	G	AA	GG	GG	GG		GG	GG	AA	AG	GG	0	3	3	100	0	2	2	100	0	2	2	100	0	2	2	100
B217	84	T	C	C	TT	CC	CC	CC		CC	CC	TT	TC	CC	0	3	3	100	0	2	2	100	0	2	2	100	0	2	2	100
B217	118	A	C	A	AA	AA	AA	AC		AA	AA	AA	AC	CC	3	0	3	0	1	1	2	50	2	0	2	0	2	0	2	0
B217	119	G	A	G	GG	GG	GG	GA		GG	GG	GG	GA	AA	3	0	3	0	1	1	2	50	2	0	2	0	2	0	2	0
B217	148	C	A	C	CC	CC	CC	CA		CC	CC	CC	CA	AA	3	0	3	0	1	1	2	50	2	0	2	0	2	0	2	0
B220	56	G	A	A	GG	AA	AA	AA		AA	AA	GG	GA	AA	0	3	3	100	0	2	2	100	0	2	2	100	0	2	2	100
B220	57	G	T	T	GG	TT	TT	TT		TT	TT	GG	GT	TT	0	3	3	100	0	2	2	100	0	2	2	100	0	2	2	100
B220	58	A	G	G	AA	GG	GG	GG		GG	GG	AA	AG	GG	0	3	3	100	0	2	2	100	0	2	2	100	0	2	2	100
B220	60	A	C	C	AA	CC	CC	CC		CC	CC	AA	AC	CC	0	3	3	100	0	2	2	100	0	2	2	100	0	2	2	100
B220	61	A	T	T	AA	TT	TT	TT		TT	TT	AA	AT	TT	0	3	3	100	0	2	2	100	0	2	2	100	0	2	2	100
B220	62	A	G	G	AA	GG	GG	GG		GG	GG	AA	AG	GG	0	3	3	100	0	2	2	100	0	2	2	100	0	2	2	100
B220	63	A	G	G	AA	GG	GG	GG		GG	GG	AA	AG	GG	0	3	3	100	0	2	2	100	0	2	2	100	0	2	2	100
B220	64	A	G	G	AA	GG	GG	GG		GG	GG	AA	AG	GG	0	3	3	100	0	2	2	100	0	2	2	100	0	2	2	100
B220	66	A	G	G	AA	GG	GG	GG		GG	GG	AA	AG	GG	0	3	3	100	0	2	2	100	0	2	2	100	0	2	2	100
B220	67	A	G	G	AA	GG	GG	GG		GG	GG	AA	AG	GG	0	3	3	100	0	2	2	100	0	2	2	100	0	2	2	100
B220	70	A	T	T	AA	TT	TT	TT		TT	TT	AA	AT	TT	0	3	3	100	0	2	2	100	0	2	2	100	0	2	2	100
B220	71	A	C	C	AA	CC	CC	CC		CC	CC	AA	AC	CC	0	3	3	100	0	2	2	100	0	2	2	100	0	2	2	100
B220	72	T	C	C	TT	CC	CC	CC		CC	CC	TT	TC	CC	0	3	3	100	0	2	2	100	0	2	2	100	0	2	2	100
B220	86	G	A	A	GG	AA	AA	AA		AA	AA	GG	GA	AA	0	3	3	100	0	2	2	100	0	2	2	100	0	2	2	100
B220	94	G	A	A	GG	AA	AA	AA		AA	AA	GG	GA	AA	0	3	3	100	0	2	2	100	0	2	2	100	0	2	2	100
B220	131	A	C	C	AA	CC	CC	AA		AA	AA	AA	AC	CC	0	3	3	100	2	0	2	0	2	0	2	0	2	0	2	0
B220	140	A	T	A	AA	AA	AA	AT		AA	AA	AA	AT	TT	3	0	3	0	1	1	2	50	2	0	2	0	2	0	2	0
B220	155	A	G	G	AA	GG	GG	GG		GG	GG	AA	AG	GG	0	3	3	100	0	2	2	100	0	2	2	100	0	2	2	100
B221	71	T	C	C	TT	CC	CC	CC		CC	CC	TT	TC	CC	0	3	3	100	0	2	2	100	0	2	2	100	0	2	2	100
B221	116	T	C	C	TT	CC	CC	CC		CC	CC	TT	TC	CC	0	3	3	100	0	2	2	100	0	2	2	100	0	2	2	100
B221	119	T	C	C	TT	CC	CC	CC		CC	CC	TT	TC	CC	0	3	3	100	0	2	2	100	0	2	2	100	0	2	2	100
B221	147	A	G	G	AA	GG	GG	GG		GG	GG	AA	AG	GG	0	3	3	100	0	2	2	100	0	2	2	100	0	2	2	100
B221	175	A	G	G	AA	GG	GG	GG		GG	GG	AA	AG	GG	0	3	3	100	0	2	2	100	0	2	2	100	0	2	2	100
B221	177	A	G	G	AA	GG	GG	GG		GG	GG	AA	AG	GG	0	3	3	100	0	2	2	100	0	2	2	100	0	2	2	100
B222	59	T	C	C	TT	CC	CC	CC		CC	CC	TT	TC	CC	0	3	3	100	0	2	2	100	0	2	2	100	0	2	2	100
B222	62	T	C	C	TT	CC	CC	CC		CC	CC	TT	TC	CC	0	3	3	100	0	2	2	100	0	2	2	100	0	2	2	100
B222	107	C	T	C	CC	CC	CC	CC		TT	TT	CC	CT	TT	3	0	3	0	2	0	2	0	0	2	2	100	0	2	2	100
B222	113	C	T	T	CC	TT	TT	TT		TT	TT	CC	CT	TT	0	3	3	100	0	2	2	100	0	2	2	100	0	2	2	100
B222	125	C	T	C	CC	CC	CC	CT		CC	CC	CC	CT	TT	3	0	3	0	1	1	2	50	2	0	2	0	2	0	2	0
B222	128	A	G	G	AA	GG	GG	GG		GG	GG	AA	AG	GG	0	3	3	100	0	2	2	100	0	2	2	100	0	2	2	100
B222	148	A	G	G	AA	GG	GG	GG		GG	GG	AA	AG	GG	0	3	3	100	0	2	2	100	0	2	2	100	0	2	2	100
B223	108	G	T	T	GG	TT	TT	TT		TT	TT	GG	GT	TT	0	3	3	100	0	2	2	100	0	2	2	100	0	2	2	100
B223	134	G	C	C	GG	CC	CC	CC		CC	CC	GG	GC	CC	0	3	3	100	0	2	2	100	0	2	2	100	0	2	2	100
B226	45	T	C	C	TT	CC	CC	CC		CC	CC	TT	TC	CC	0	3	3	100	0	2	2	100	0	2	2	100	0	2	2	100
B226	91	C	T	C	CC	CC	CC	CC		TT	CC	CC	CT	TT	3	0	3	0	2	0	2	0	0	2	2	100	2	0	2	0
B229	73	A	G	G	AA	GG	GG	GG		GG	GG	AA	AG	GG	0	3	3	100	0	2	2	100	0	2	2	100	0	2	2	100
B229	75	A	G	G	AA	GG	GG	GG		GG	GG	AA	AG	GG	0	3	3	100	0	2	2	100	0	2	2	100	0	2	2	100
B229	77	A	C	C	AA	CC	CC	CC		CC	CC	AA	AC	CC	0	3	3	100	0	2	2	100	0	2	2	100	0	2	2	100
B229	78	G	A	A	GG	AA	AA	AA		AA	AA	GG	GA	AA	0	3	3	100	0	2	2	100	0	2	2	100	0	2	2	100
B229	98	C	T	T	CC	TT	TT	TT		TT	TT	CC	CT	TT	0	3	3	100	0	2	2	100	0	2	2	100	0	2	2	100
B229	99	A	G	G	AA	GG	GG	GG		GG	GG	AA	AG	GG	0	3	3	100	0	2	2	100	0	2	2	100	0	2	2	100
B229	113	C	T	C	CC	CC	CC	TT		CC	CC	CC	CT	TT	3	0	3	0	0	2	2	100	2	0	2	0	2	0	2	0
B229	115	C	T	T	CC	TT	TT	TT		TT	TT	CC	CT	TT	0	3	3	100	0	2	2	100	0	2	2	100	0	2	2	100
B230	70	A	G	G	AA	GG	GG	GG		GG	GG	AA	AG	GG	0	3	3	100	0	2	2	100	0	2	2	100	0	2	2	100
B230	76	C	T	T	CC	TT	TT	TT		TT	TT	CC	CT	TT	0	3	3	100	0	2	2	100	0	2	2	100	0	2	2	100
B233	87	C	A	C	CC	CC	CC	AA		AA	AA	CC	CA	AA	3	0	3	0	0	2	2	100	0	2	2	100	0	2	2	100
B233	142	G	A	G	GG	GG	GG	GA		GG	GG	GG	GA	AA	3	0	3	0	1	1	2	50	2	0	2	0	2	0	2	0
B233	154	A	G	G	AA	GG	GG	GG		GG	GG	AA	AG	GG	0	3	3	100	0	2	2	100	0	2	2	100	0	2	2	100
B233	176	A	T	A	AA	AA	AA	AA		AA	TT	AA	AT	TT	3	0	3	0	2	0	2	0	2	0	2	0	0	2	2	100
B234	59	C	T	T	CC	TT	TT	TT		TT	TT	CC	CT	TT	0	3	3	100	0	2	2	100	0	2	2	100	0	2	2	100
B234	60	T	C	C	TT	CC	CC	CC		CC	CC	TT	TC	CC	0	3	3	100	0	2	2	100	0	2	2	100	0	2	2	100
B234	76	C	T	T	CC	TT	TT	TT		TT	TT	CC	CT	TT	0	3	3	100	0	2	2	100	0	2	2	100	0	2	2	100
B234	109	A	G	G	AA	GG	GG	GG		GG	GG	AA	AG	GG	0	3	3	100	0	2	2	100	0	2	2	100	0	2	2	100
B236	52	T	C	C	TT	CC	CC	CC		CC	CC	TT	TC	CC	0	3	3	100	0	2	2	100	0	2	2	100	0	2	2	100
B236	84	T	C	C	TT	CC	CC	CC		CC	CC	TT	TC	CC	0	3	3	100	0	2	2	100	0	2	2	100	0	2	2	100
B236	101	T	C	C	TT	CC	CC	CC		CC	CC	TT	TC	CC	0	3	3	100	0	2	2	100	0	2	2	100	0	2	2	100
B236	129	G	A	A	GG	AA	AA	AA		AA	AA	GG	GA	AA	0	3	3	100	0	2	2	100	0	2	2	100	0	2	2	100
B237	55	T	C	C	TT	CC	CC	CC		CC	CC	TT	TC	CC	0	3	3	100	0	2	2	100	0	2	2	100	0	2	2	100
B237	107	T	C	C	TT	CC	CC	CC		CC	CC	TT	TC	CC	0	3	3	100	0	2	2	100	0	2	2	100	0	2	2	100
B237	130	T	C	C	TT	CC	CC	CC		CC	CC	TT	TC	CC	0	3	3	100	0	2	2	100	0	2	2	100	0	2	2	100
B237	133	C	A	A	CC	AA	AA	AA		AA	AA	CC	CA	AA	0	3	3	100	0	2	2	100	0	2	2	100	0	2	2	100
B237	156	A	G	G	AA	GG	GG	GG		GG	GG	AA	AG	GG	0	3	3	100	0	2	2	100	0	2	2	100	0	2	2	100
B237	157	A	G	G	AA	GG	GG	GG		GG	GG	AA	AG	GG	0	3	3	100	0	2	2	100	0	2	2	100	0	2	2	100
B240	168	G	A	A	GG	AA	AA	AA		AA	AA	GG	GA	AA	0	3	3	100	0	2	2	100	0	2	2	100	0	2	2	100
B240	173	T	G	G	TT	GG	GG	GG		GG	GG	TT	TG	GG	0	3	3	100	0	2	2	100	0	2	2	100	0	2	2	100
B241	72	T	G	G	TT	GG	GG	GG		GG	GG	TT	TG	GG	0	3	3	100	0	2	2	100	0	2	2	100	0	2	2	100
B241	73	T	C	C	TT	CC	CC	CC		CC	CC	TT	TC	CC	0	3	3	100	0	2	2	100	0	2	2	100	0	2	2	100
B241	74	T	C	C	TT	CC	CC	CC		CC	CC	TT	TC	CC	0	3	3	100	0	2	2	100	0	2	2	100	0	2	2	100
B241	77	T	C	C	TT	CC	CC	CC		CC	CC	TT	TC	CC	0	3	3	100	0	2	2	100	0	2	2	100	0	2	2	100
B241	78	T	C	C	TT	CC	CC	CC		CC	CC	TT	TC	CC	0	3	3	100	0	2	2	100	0	2	2	100	0	2	2	100
B241	79	T	C	C	TT	CC	CC	CC		CC	CC	TT	TC	CC	0	3	3	100	0	2	2	100	0	2	2	100	0	2	2	100
B241	84	T	C	C	TT	CC	CC	CC		CC	CC	TT	TC	CC	0	3	3	100	0	2	2	100	0	2	2	100	0	2	2	100
B241	85	T	C	C	TT	CC	CC	CC		CC	CC	TT	TC	CC	0	3	3	100	0	2	2	100	0	2	2	100	0	2	2	100
B241	110	G	C	G	GG	GG	GG	GC		CC	CC	GG	GC	CC	3	0	3	0	1	1	2	50	0	2	2	100	0	2	2	100
B241	169	A	C	A	AA	AA	AA	AA		AA	CC	AA	AC	CC	3	0	3	0	2	0	2	0	2	0	2	0	0	2	2	100
B242	118	G	A	A	GG	AA	AA	AA		AA	AA	GG	GA	AA	0	3	3	100	0	2	2	100	0	2	2	100	0	2	2	100
B242	119	T	A	A	TT	AA	AA	AA		AA	AA	TT	TA	AA	0	3	3	100	0	2	2	100	0	2	2	100	0	2	2	100
B242	134	T	C	C	TT	CC	CC	CC		CC	CC	TT	TC	CC	0	3	3	100	0	2	2	100	0	2	2	100	0	2	2	100
B242	140	T	C	C	TT	CC	CC	CC		CC	CC	TT	TC	CC	0	3	3	100	0	2	2	100	0	2	2	100	0	2	2	100
B242	158	C	T	T	CC	TT	TT	TT		TT	TT	CC	CT	TT	0	3	3	100	0	2	2	100	0	2	2	100	0	2	2	100
B242	160	T	C	C	TT	CC	CC	CC		CC	CC	TT	TC	CC	0	3	3	100	0	2	2	100	0	2	2	100	0	2	2	100
B242	166	A	G	G	AA	GG	GG	GG		GG	GG	AA	AG	GG	0	3	3	100	0	2	2	100	0	2	2	100	0	2	2	100
B243	71	T	C	C	TT	CC	CC	CC		CC	CC	TT	TC	CC	0	3	3	100	0	2	2	100	0	2	2	100	0	2	2	100
B243	106	T	C	C	TT	CC	CC	CC		TT	CC	TT	TC	CC	0	3	3	100	0	2	2	100	2	0	2	0	0	2	2	100
B243	107	G	A	G	GG	GG	GG	GG		GG	AA	GG	GA	AA	3	0	3	0	2	0	2	0	2	0	2	0	0	2	2	100
B243	140	C	G	G	CC	GG	CC	CC		CC	CC	CC	CG	GG	2	1	3	33.3333	2	0	2	0	2	0	2	0	2	0	2	0
B243	154	A	G	G	AA	GG	GG	GG		GG	GG	AA	AG	GG	0	3	3	100	0	2	2	100	0	2	2	100	0	2	2	100
B243	157	A	G	G	AA	GG	GG	GG		GG	GG	AA	AG	GG	0	3	3	100	0	2	2	100	0	2	2	100	0	2	2	100
B244	86	G	C	G	GG	GG	GG	GG		CC	GG	GG	GC	CC	3	0	3	0	2	0	2	0	0	2	2	100	2	0	2	0
B244	101	G	C	G	GG	GG	GG	GG		CC	GG	GG	GC	CC	3	0	3	0	2	0	2	0	0	2	2	100	2	0	2	0
B244	104	G	T	T	GG	TT	TT	TT		TT	TT	GG	GT	TT	0	3	3	100	0	2	2	100	0	2	2	100	0	2	2	100
B244	117	C	A	A	CC	AA	AA	AA		AA	AA	CC	CA	AA	0	3	3	100	0	2	2	100	0	2	2	100	0	2	2	100
B244	131	G	C	G	GG	GG	GG	GG		CC	GG	GG	GC	CC	3	0	3	0	2	0	2	0	0	2	2	100	2	0	2	0
B244	133	G	A	G	GG	GG	GG	AA		GG	GG	GG	GA	AA	3	0	3	0	0	2	2	100	2	0	2	0	2	0	2	0
B244	152	A	G	G	AA	GG	GG	GG		GG	GG	AA	AG	GG	0	3	3	100	0	2	2	100	0	2	2	100	0	2	2	100
B244	153	A	G	G	AA	GG	GG	GG		GG	GG	AA	AG	GG	0	3	3	100	0	2	2	100	0	2	2	100	0	2	2	100
B245	61	G	C	C	GG	CC	CC	CC		CC	CC	GG	GC	CC	0	3	3	100	0	2	2	100	0	2	2	100	0	2	2	100
B245	106	T	C	C	TT	CC	CC	CC		CC	CC	TT	TC	CC	0	3	3	100	0	2	2	100	0	2	2	100	0	2	2	100
B245	119	A	G	G	AA	GG	GG	GG		GG	GG	AA	AG	GG	0	3	3	100	0	2	2	100	0	2	2	100	0	2	2	100
B245	132	A	G	G	AA	GG	GG	GG		GG	GG	AA	AG	GG	0	3	3	100	0	2	2	100	0	2	2	100	0	2	2	100
B246	94	T	C	C	TT	CC	CC	CC		CC	CC	TT	TC	CC	0	3	3	100	0	2	2	100	0	2	2	100	0	2	2	100
B246	109	G	A	G	GG	GG	GG	GG		GG	AA	GG	GA	AA	3	0	3	0	2	0	2	0	2	0	2	0	0	2	2	100
B247	120	C	T	C	CC	CC	TT	CC		TT	CC	CC	CT	TT	1	2	3	66.6667	2	0	2	0	0	2	2	100	2	0	2	0
B247	130	T	G	G	TT	GG	TT	TG		TT	TG	TT	TG	GG	2	1	3	33.3333	1	1	2	50	2	0	2	0	1	1	2	50
B248	57	T	C	C	TT	CC	CC	CC		CC	CC	TT	TC	CC	0	3	3	100	0	2	2	100	0	2	2	100	0	2	2	100
B248	81	T	C	T	TT	TT	TT	TT		CC	TT	TT	TC	CC	3	0	3	0	2	0	2	0	0	2	2	100	2	0	2	0
B248	93	T	C	T	TT	TT	TT	TT		TT	CC	TT	TC	CC	3	0	3	0	2	0	2	0	2	0	2	0	0	2	2	100
B248	98	A	G	A	AA	AA	AA	AA		GG	AA	AA	AG	GG	3	0	3	0	2	0	2	0	0	2	2	100	2	0	2	0
B248	127	T	A	T	TT	TT	TT	AA		TT	TT	TT	TA	AA	3	0	3	0	0	2	2	100	2	0	2	0	2	0	2	0
B248	159	A	T	A	AA	AA	AA	TT		AA	AA	AA	AT	TT	3	0	3	0	0	2	2	100	2	0	2	0	2	0	2	0
B250	51	T	A	A	TT	AA	AA	AA		AA	AA	TT	TA	AA	0	3	3	100	0	2	2	100	0	2	2	100	0	2	2	100
B250	138	C	A	A	CC	AA	AA	CC		CC	CC	CC	CA	AA	0	3	3	100	2	0	2	0	2	0	2	0	2	0	2	0
B250	146	A	G	A	AA	AA	AA	AG		AA	AA	AA	AG	GG	3	0	3	0	1	1	2	50	2	0	2	0	2	0	2	0
B251	92	A	G	A	AA	AA	AA	AA		AA	AG	AA	AG	GG	3	0	3	0	2	0	2	0	2	0	2	0	1	1	2	50
B251	113	A	T	A	AA	AA	AA	TT		TT	TT	AA	AT	TT	3	0	3	0	0	2	2	100	0	2	2	100	0	2	2	100
B251	136	C	A	A	CC	AA	AA	CC		CC	CC	CC	CA	AA	0	3	3	100	2	0	2	0	2	0	2	0	2	0	2	0
B251	141	A	G	A	AA	AA	AA	AA		AG	AA	AA	AG	GG	3	0	3	0	2	0	2	0	1	1	2	50	2	0	2	0
B253	72	T	C	C	TT	CC	CC	CC		CC	CC	TT	TC	CC	0	3	3	100	0	2	2	100	0	2	2	100	0	2	2	100
B253	105	A	G	A	AA	AA	AG	AA		AA	AA	AA	AG	GG	2	1	3	33.3333	2	0	2	0	2	0	2	0	2	0	2	0
B253	126	A	G	G	AA	GG	GG	GG		GG	GG	AA	AG	GG	0	3	3	100	0	2	2	100	0	2	2	100	0	2	2	100
B253	173	A	G	G	AA	GG	GG	GG		GG	GG	AA	AG	GG	0	3	3	100	0	2	2	100	0	2	2	100	0	2	2	100
B256	50	A	G	G	AA	GG	GG	GG		GG	GG	AA	AG	GG	0	3	3	100	0	2	2	100	0	2	2	100	0	2	2	100
B256	111	A	G	G	AA	GG	GG	GG		GG	GG	AA	AG	GG	0	3	3	100	0	2	2	100	0	2	2	100	0	2	2	100
B256	115	G	T	T	GG	TT	GG	GG		GG	GG	GG	GT	TT	2	1	3	33.3333	2	0	2	0	2	0	2	0	2	0	2	0
B256	134	A	G	G	AA	GG	GG	GG		GG	GG	AA	AG	GG	0	3	3	100	0	2	2	100	0	2	2	100	0	2	2	100
B259	53	C	T	T	CC	TT	TT	TT		TT	TT	CC	CT	TT	0	3	3	100	0	2	2	100	0	2	2	100	0	2	2	100
B259	55	T	C	C	TT	CC	CC	CC		CC	CC	TT	TC	CC	0	3	3	100	0	2	2	100	0	2	2	100	0	2	2	100
B259	94	A	G	G	AA	GG	GG	GG		GG	GG	AA	AG	GG	0	3	3	100	0	2	2	100	0	2	2	100	0	2	2	100
B259	96	A	T	T	AA	TT	TT	TT		TT	TT	AA	AT	TT	0	3	3	100	0	2	2	100	0	2	2	100	0	2	2	100
B259	120	T	C	C	TT	CC	CC	CC		CC	CC	TT	TC	CC	0	3	3	100	0	2	2	100	0	2	2	100	0	2	2	100
B259	127	G	A	A	GG	AA	AA	GG		GG	GG	GG	GA	AA	0	3	3	100	2	0	2	0	2	0	2	0	2	0	2	0
B259	142	T	C	C	TT	CC	CC	CC		CC	CC	TT	TC	CC	0	3	3	100	0	2	2	100	0	2	2	100	0	2	2	100
B259	143	C	T	T	CC	TT	TT	TT		TT	TT	CC	CT	TT	0	3	3	100	0	2	2	100	0	2	2	100	0	2	2	100
B259	145	G	T	T	GG	TT	TT	TT		TT	TT	GG	GT	TT	0	3	3	100	0	2	2	100	0	2	2	100	0	2	2	100
B259	146	C	A	A	CC	AA	AA	AA		AA	AA	CC	CA	AA	0	3	3	100	0	2	2	100	0	2	2	100	0	2	2	100
B259	148	T	A	A	TT	AA	AA	AA		AA	AA	TT	TA	AA	0	3	3	100	0	2	2	100	0	2	2	100	0	2	2	100
B259	152	T	G	G	TT	GG	GG	GG		GG	GG	TT	TG	GG	0	3	3	100	0	2	2	100	0	2	2	100	0	2	2	100
B259	153	A	C	C	AA	CC	CC	CC		CC	CC	AA	AC	CC	0	3	3	100	0	2	2	100	0	2	2	100	0	2	2	100
B259	155	T	G	G	TT	GG	GG	GG		GG	GG	TT	TG	GG	0	3	3	100	0	2	2	100	0	2	2	100	0	2	2	100
B260	69	T	C	C	TT	CC	CC	CC		CC	CC	TT	TC	CC	0	3	3	100	0	2	2	100	0	2	2	100	0	2	2	100
B260	77	G	A	A	GG	AA	AA	GG		GG	GG	GG	GA	AA	0	3	3	100	2	0	2	0	2	0	2	0	2	0	2	0
B260	110	C	T	C	CC	CC	CT	CC		CC	CC	CC	CT	TT	2	1	3	33.3333	2	0	2	0	2	0	2	0	2	0	2	0
B260	121	T	G	G	TT	GG	GG	GG		TT	TT	TT	TG	GG	0	3	3	100	0	2	2	100	2	0	2	0	2	0	2	0
B260	139	A	G	G	AA	GG	GG	GG		GG	GG	AA	AG	GG	0	3	3	100	0	2	2	100	0	2	2	100	0	2	2	100
B260	146	A	G	G	AA	GG	GG	GG		GG	GG	AA	AG	GG	0	3	3	100	0	2	2	100	0	2	2	100	0	2	2	100
B260	148	A	G	G	AA	GG	GG	GG		GG	GG	AA	AG	GG	0	3	3	100	0	2	2	100	0	2	2	100	0	2	2	100
B260	150	A	G	G	AA	GG	GG	GG		GG	GG	AA	AG	GG	0	3	3	100	0	2	2	100	0	2	2	100	0	2	2	100
B260	155	A	G	G	AA	GG	GG	GG		GG	GG	AA	AG	GG	0	3	3	100	0	2	2	100	0	2	2	100	0	2	2	100
B260	158	A	G	G	AA	GG	GG	GG		GG	GG	AA	AG	GG	0	3	3	100	0	2	2	100	0	2	2	100	0	2	2	100
B260	159	A	G	G	AA	GG	GG	GG		GG	GG	AA	AG	GG	0	3	3	100	0	2	2	100	0	2	2	100	0	2	2	100
B260	161	A	G	G	AA	GG	GG	GG		GG	GG	AA	AG	GG	0	3	3	100	0	2	2	100	0	2	2	100	0	2	2	100
B260	167	A	G	G	AA	GG	GG	GG		GG	GG	AA	AG	GG	0	3	3	100	0	2	2	100	0	2	2	100	0	2	2	100
B260	169	A	G	G	AA	GG	GG	GG		GG	GG	AA	AG	GG	0	3	3	100	0	2	2	100	0	2	2	100	0	2	2	100
B261	67	T	C	C	TT	CC	CC	CC		CC	CC	TT	TC	CC	0	3	3	100	0	2	2	100	0	2	2	100	0	2	2	100
B261	170	A	G	G	AA	GG	GG	GG		GG	GG	AA	AG	GG	0	3	3	100	0	2	2	100	0	2	2	100	0	2	2	100
B262	71	T	C	C	TT	CC	CC	CC		CC	CC	TT	TC	CC	0	3	3	100	0	2	2	100	0	2	2	100	0	2	2	100
B262	73	C	T	C	CC	CC	CC	CC		CT	CC	CC	CT	TT	3	0	3	0	2	0	2	0	1	1	2	50	2	0	2	0
B262	77	T	C	C	TT	CC	CC	CC		CC	CC	TT	TC	CC	0	3	3	100	0	2	2	100	0	2	2	100	0	2	2	100
B262	98	C	A	A	CC	AA	AA	AA		AA	AA	CC	CA	AA	0	3	3	100	0	2	2	100	0	2	2	100	0	2	2	100
B262	103	C	G	G	CC	GG	GG	CC		CC	CC	CC	CG	GG	0	3	3	100	2	0	2	0	2	0	2	0	2	0	2	0
B262	117	A	T	T	AA	TT	TT	TT		TT	TT	AA	AT	TT	0	3	3	100	0	2	2	100	0	2	2	100	0	2	2	100
B262	164	A	G	G	AA	GG	GG	GG		GG	GG	AA	AG	GG	0	3	3	100	0	2	2	100	0	2	2	100	0	2	2	100
B262	167	T	C	T	TT	TT	TC	TT		TT	TT	TT	TC	CC	2	1	3	33.3333	2	0	2	0	2	0	2	0	2	0	2	0
B262	174	A	G	G	AA	GG	GG	GG		GG	GG	AA	AG	GG	0	3	3	100	0	2	2	100	0	2	2	100	0	2	2	100
B265	51	C	G	G	CC	GG	GG	GG		GG	GG	CC	CG	GG	0	3	3	100	0	2	2	100	0	2	2	100	0	2	2	100
B265	92	G	A	G	GG	GG	GG	GA		GG	GG	GG	GA	AA	3	0	3	0	1	1	2	50	2	0	2	0	2	0	2	0
B265	110	G	T	G	GG	GG	GG	GG		TT	TT	GG	GT	TT	3	0	3	0	2	0	2	0	0	2	2	100	0	2	2	100
B265	130	T	G	G	TT	GG	GG	TT		TT	TT	TT	TG	GG	0	3	3	100	2	0	2	0	2	0	2	0	2	0	2	0
B266	54	T	C	C	TT	CC	CC	CC		CC	CC	TT	TC	CC	0	3	3	100	0	2	2	100	0	2	2	100	0	2	2	100
B266	71	T	C	T	TT	TT	TT	CC		CC	CC	TT	TC	CC	3	0	3	0	0	2	2	100	0	2	2	100	0	2	2	100
B266	103	C	T	C	CC	CC	CC	CC		CC	TT	CC	CT	TT	3	0	3	0	2	0	2	0	2	0	2	0	0	2	2	100
B267	61	C	G	C	CC	CC	CC	CC		GG	GG	CC	CG	GG	3	0	3	0	2	0	2	0	0	2	2	100	0	2	2	100
B267	87	G	C	G	GG	GG	GG	GG		CC	GG	GG	GC	CC	3	0	3	0	2	0	2	0	0	2	2	100	2	0	2	0
B267	106	C	T	C	CC	CC	CC	CC		TT	TT	CC	CT	TT	3	0	3	0	2	0	2	0	0	2	2	100	0	2	2	100
B267	109	T	C	C	TT	CC	CC	CC		CC	CC	TT	TC	CC	0	3	3	100	0	2	2	100	0	2	2	100	0	2	2	100
B267	118	G	A	A	GG	AA	AA	AA		AA	AA	GG	GA	AA	0	3	3	100	0	2	2	100	0	2	2	100	0	2	2	100
B267	120	C	G	G	CC	GG	GG	GG		GG	GG	CC	CG	GG	0	3	3	100	0	2	2	100	0	2	2	100	0	2	2	100
B267	123	T	C	C	TT	CC	CC	CC		CC	CC	TT	TC	CC	0	3	3	100	0	2	2	100	0	2	2	100	0	2	2	100
B267	136	C	A	A	CC	AA	AA	AA		AA	AA	CC	CA	AA	0	3	3	100	0	2	2	100	0	2	2	100	0	2	2	100
B269	109	T	C	C	TT	CC	CC	CC		CC	CC	TT	TC	CC	0	3	3	100	0	2	2	100	0	2	2	100	0	2	2	100
B269	119	G	A	G	GG	GG	GG	GG		GA	GG	GG	GA	AA	3	0	3	0	2	0	2	0	1	1	2	50	2	0	2	0
B269	124	T	A	A	TT	AA	AA	AA		AA	AA	TT	TA	AA	0	3	3	100	0	2	2	100	0	2	2	100	0	2	2	100
B269	152	C	T	T	CC	TT	TT	TT		TT	TT	CC	CT	TT	0	3	3	100	0	2	2	100	0	2	2	100	0	2	2	100
B271	54	T	G	G	TT	GG	GG	GG		GG	GG	TT	TG	GG	0	3	3	100	0	2	2	100	0	2	2	100	0	2	2	100
B271	55	C	A	A	CC	AA	AA	AA		AA	AA	CC	CA	AA	0	3	3	100	0	2	2	100	0	2	2	100	0	2	2	100
B271	56	G	C	C	GG	CC	CC	CC		CC	CC	GG	GC	CC	0	3	3	100	0	2	2	100	0	2	2	100	0	2	2	100
B271	65	T	A	A	TT	AA	AA	AA		AA	AA	TT	TA	AA	0	3	3	100	0	2	2	100	0	2	2	100	0	2	2	100
B271	71	A	T	T	AA	TT	TT	TT		TT	TT	AA	AT	TT	0	3	3	100	0	2	2	100	0	2	2	100	0	2	2	100
B271	76	A	G	G	AA	GG	GG	GG		GG	GG	AA	AG	GG	0	3	3	100	0	2	2	100	0	2	2	100	0	2	2	100
B271	81	T	C	C	TT	CC	CC	CC		CC	CC	TT	TC	CC	0	3	3	100	0	2	2	100	0	2	2	100	0	2	2	100
B271	83	G	A	G	GG	GG	GG	GG		AA	AA	GG	GA	AA	3	0	3	0	2	0	2	0	0	2	2	100	0	2	2	100
B271	93	G	A	A	GG	AA	AA	AA		AA	AA	GG	GA	AA	0	3	3	100	0	2	2	100	0	2	2	100	0	2	2	100
B271	95	G	A	A	GG	AA	AA	AA		AA	AA	GG	GA	AA	0	3	3	100	0	2	2	100	0	2	2	100	0	2	2	100
B271	113	C	T	T	CC	TT	TT	TT		TT	TT	CC	CT	TT	0	3	3	100	0	2	2	100	0	2	2	100	0	2	2	100
B271	114	C	T	T	CC	TT	TT	TT		TT	TT	CC	CT	TT	0	3	3	100	0	2	2	100	0	2	2	100	0	2	2	100
B271	116	T	C	C	TT	CC	CC	CC		CC	CC	TT	TC	CC	0	3	3	100	0	2	2	100	0	2	2	100	0	2	2	100
B271	156	C	T	T	CC	TT	TT	TT		TT	TT	CC	CT	TT	0	3	3	100	0	2	2	100	0	2	2	100	0	2	2	100
B273	54	G	A	G	GG	GG	GG	GG		GA	GG	GG	GA	AA	3	0	3	0	2	0	2	0	1	1	2	50	2	0	2	0
B273	63	C	T	C	CC	CC	CC	CC		TT	TT	CC	CT	TT	3	0	3	0	2	0	2	0	0	2	2	100	0	2	2	100
B273	71	C	T	T	CC	TT	TT	TT		TT	TT	CC	CT	TT	0	3	3	100	0	2	2	100	0	2	2	100	0	2	2	100
B273	100	C	T	T	CC	TT	TT	TT		TT	TT	CC	CT	TT	0	3	3	100	0	2	2	100	0	2	2	100	0	2	2	100
B273	112	T	C	C	TT	CC	CC	CC		CC	CC	TT	TC	CC	0	3	3	100	0	2	2	100	0	2	2	100	0	2	2	100
B273	118	A	G	G	AA	GG	GG	GG		GG	GG	AA	AG	GG	0	3	3	100	0	2	2	100	0	2	2	100	0	2	2	100
B273	123	A	G	G	AA	GG	GG	GG		GG	GG	AA	AG	GG	0	3	3	100	0	2	2	100	0	2	2	100	0	2	2	100
B273	139	A	G	G	AA	GG	GG	GG		GG	GG	AA	AG	GG	0	3	3	100	0	2	2	100	0	2	2	100	0	2	2	100
B273	147	A	G	G	AA	GG	GG	GG		GG	GG	AA	AG	GG	0	3	3	100	0	2	2	100	0	2	2	100	0	2	2	100
B277	62	T	C	C	TT	CC	CC	CC		CC	CC	TT	TC	CC	0	3	3	100	0	2	2	100	0	2	2	100	0	2	2	100
B277	124	A	G	G	AA	GG	GG	GG		GG	GG	AA	AG	GG	0	3	3	100	0	2	2	100	0	2	2	100	0	2	2	100
B277	127	A	G	G	AA	GG	GG	GG		GG	GG	AA	AG	GG	0	3	3	100	0	2	2	100	0	2	2	100	0	2	2	100
B277	128	A	G	G	AA	GG	GG	GG		GG	GG	AA	AG	GG	0	3	3	100	0	2	2	100	0	2	2	100	0	2	2	100
B277	140	A	G	G	AA	GG	GG	GG		GG	GG	AA	AG	GG	0	3	3	100	0	2	2	100	0	2	2	100	0	2	2	100
B277	141	A	G	G	AA	GG	GG	GG		GG	GG	AA	AG	GG	0	3	3	100	0	2	2	100	0	2	2	100	0	2	2	100
B277	144	A	G	G	AA	GG	GG	GG		GG	GG	AA	AG	GG	0	3	3	100	0	2	2	100	0	2	2	100	0	2	2	100
B277	145	A	G	G	AA	GG	GG	GG		GG	GG	AA	AG	GG	0	3	3	100	0	2	2	100	0	2	2	100	0	2	2	100
B277	150	A	G	G	AA	GG	GG	GG		GG	GG	AA	AG	GG	0	3	3	100	0	2	2	100	0	2	2	100	0	2	2	100
B278	91	T	C	C	TT	CC	CC	CC		CC	CC	TT	TC	CC	0	3	3	100	0	2	2	100	0	2	2	100	0	2	2	100
B278	97	C	G	G	CC	GG	GG	GG		GG	GG	CC	CG	GG	0	3	3	100	0	2	2	100	0	2	2	100	0	2	2	100
B278	124	G	A	G	GG	GG	GG	GG		GA	GG	GG	GA	AA	3	0	3	0	2	0	2	0	1	1	2	50	2	0	2	0
B278	132	A	G	G	AA	GG	GG	GG		GG	GG	AA	AG	GG	0	3	3	100	0	2	2	100	0	2	2	100	0	2	2	100
B278	153	T	A	A	TT	AA	AA	AA		AA	AA	TT	TA	AA	0	3	3	100	0	2	2	100	0	2	2	100	0	2	2	100
B278	161	A	G	G	AA	GG	GG	GG		GG	GG	AA	AG	GG	0	3	3	100	0	2	2	100	0	2	2	100	0	2	2	100
B278	164	A	G	G	AA	GG	GG	GG		AA	AA	AA	AG	GG	0	3	3	100	0	2	2	100	2	0	2	0	2	0	2	0
B279	66	T	C	T	TT	TT	TT	TT		TC	TT	TT	TC	CC	3	0	3	0	2	0	2	0	1	1	2	50	2	0	2	0
B279	96	C	T	T	CC	TT	TT	TT		TT	TT	CC	CT	TT	0	3	3	100	0	2	2	100	0	2	2	100	0	2	2	100
B279	101	T	G	G	TT	GG	GG	GG		GG	GG	TT	TG	GG	0	3	3	100	0	2	2	100	0	2	2	100	0	2	2	100
B279	119	G	A	G	GG	GG	GG	GG		GG	AA	GG	GA	AA	3	0	3	0	2	0	2	0	2	0	2	0	0	2	2	100
B281	103	G	T	T	GG	TT	TT	TT		TT	TT	GG	GT	TT	0	3	3	100	0	2	2	100	0	2	2	100	0	2	2	100
B281	115	T	C	C	TT	CC	CC	CC		CC	CC	TT	TC	CC	0	3	3	100	0	2	2	100	0	2	2	100	0	2	2	100
B283	94	T	C	C	TT	CC	CC	CC		CC	CC	TT	TC	CC	0	3	3	100	0	2	2	100	0	2	2	100	0	2	2	100
B283	96	T	C	C	TT	CC	CC	CC		CC	CC	TT	TC	CC	0	3	3	100	0	2	2	100	0	2	2	100	0	2	2	100
B283	126	T	C	C	TT	CC	CC	CC		CC	CC	TT	TC	CC	0	3	3	100	0	2	2	100	0	2	2	100	0	2	2	100
B283	169	A	G	G	AA	GG	GG	GG		GG	GG	AA	AG	GG	0	3	3	100	0	2	2	100	0	2	2	100	0	2	2	100
B283	171	A	G	G	AA	GG	GG	GG		GG	GG	AA	AG	GG	0	3	3	100	0	2	2	100	0	2	2	100	0	2	2	100
B284	148	A	G	G	AA	GG	GG	GG		GG	GG	AA	AG	GG	0	3	3	100	0	2	2	100	0	2	2	100	0	2	2	100
B284	150	A	G	G	AA	GG	GG	GG		GG	GG	AA	AG	GG	0	3	3	100	0	2	2	100	0	2	2	100	0	2	2	100
B284	152	A	G	G	AA	GG	GG	GG		GG	GG	AA	AG	GG	0	3	3	100	0	2	2	100	0	2	2	100	0	2	2	100
B284	153	A	G	G	AA	GG	GG	GG		GG	GG	AA	AG	GG	0	3	3	100	0	2	2	100	0	2	2	100	0	2	2	100
B284	154	A	G	G	AA	GG	GG	GG		GG	GG	AA	AG	GG	0	3	3	100	0	2	2	100	0	2	2	100	0	2	2	100
B285	80	A	G	G	AA	GG	GG	GG		GG	GG	AA	AG	GG	0	3	3	100	0	2	2	100	0	2	2	100	0	2	2	100
B285	135	A	G	G	AA	GG	GG	GG		GG	GG	AA	AG	GG	0	3	3	100	0	2	2	100	0	2	2	100	0	2	2	100
B285	148	G	T	T	GG	TT	TT	TT		TT	TT	GG	GT	TT	0	3	3	100	0	2	2	100	0	2	2	100	0	2	2	100
B285	151	T	G	G	TT	GG	GG	GG		GG	GG	TT	TG	GG	0	3	3	100	0	2	2	100	0	2	2	100	0	2	2	100
B285	152	A	G	G	AA	GG	GG	GG		GG	GG	AA	AG	GG	0	3	3	100	0	2	2	100	0	2	2	100	0	2	2	100
B286	66	T	C	C	TT	CC	CC	CC		CC	CC	TT	TC	CC	0	3	3	100	0	2	2	100	0	2	2	100	0	2	2	100
B286	76	G	C	G	GG	GG	GG	CC		GG	GG	GG	GC	CC	3	0	3	0	0	2	2	100	2	0	2	0	2	0	2	0
B287	50	T	C	C	TT	CC	CC	CC		CC	CC	TT	TC	CC	0	3	3	100	0	2	2	100	0	2	2	100	0	2	2	100
B287	51	T	C	C	TT	CC	CC	CC		CC	CC	TT	TC	CC	0	3	3	100	0	2	2	100	0	2	2	100	0	2	2	100
B287	56	T	C	C	TT	CC	CC	CC		CC	CC	TT	TC	CC	0	3	3	100	0	2	2	100	0	2	2	100	0	2	2	100
B287	63	C	T	T	CC	TT	TT	TT		TT	TT	CC	CT	TT	0	3	3	100	0	2	2	100	0	2	2	100	0	2	2	100
B287	79	G	C	C	GG	CC	CC	CC		CC	CC	GG	GC	CC	0	3	3	100	0	2	2	100	0	2	2	100	0	2	2	100
B287	114	G	A	A	GG	AA	GA	GG		GG	GG	GG	GA	AA	1	2	3	66.6667	2	0	2	0	2	0	2	0	2	0	2	0
B287	115	C	T	C	CC	CC	CC	CC		CC	CT	CC	CT	TT	3	0	3	0	2	0	2	0	2	0	2	0	1	1	2	50
B287	125	T	G	G	TT	GG	GG	GG		GG	GG	TT	TG	GG	0	3	3	100	0	2	2	100	0	2	2	100	0	2	2	100
B287	142	A	G	A	AA	AA	AA	AG		AA	AA	AA	AG	GG	3	0	3	0	1	1	2	50	2	0	2	0	2	0	2	0
B288	72	T	C	C	TT	CC	CC	CC		CC	CC	TT	TC	CC	0	3	3	100	0	2	2	100	0	2	2	100	0	2	2	100
B288	73	T	C	C	TT	CC	CC	CC		CC	CC	TT	TC	CC	0	3	3	100	0	2	2	100	0	2	2	100	0	2	2	100
B288	76	T	C	C	TT	CC	CC	CC		CC	CC	TT	TC	CC	0	3	3	100	0	2	2	100	0	2	2	100	0	2	2	100
B288	86	G	T	T	GG	TT	TT	TT		TT	TT	GG	GT	TT	0	3	3	100	0	2	2	100	0	2	2	100	0	2	2	100
B288	99	A	G	A	AA	AA	AG	AA		AA	AA	AA	AG	GG	2	1	3	33.3333	2	0	2	0	2	0	2	0	2	0	2	0
B288	112	G	C	C	GG	CC	CC	CC		CC	CC	GG	GC	CC	0	3	3	100	0	2	2	100	0	2	2	100	0	2	2	100
B288	126	G	C	C	GG	CC	CC	CC		CC	CC	GG	GC	CC	0	3	3	100	0	2	2	100	0	2	2	100	0	2	2	100
B288	150	A	G	A	AA	AA	AA	AA		GG	AA	AA	AG	GG	3	0	3	0	2	0	2	0	0	2	2	100	2	0	2	0
