# Supplementary material for: Genomic DNA Sequences from Mastodon and Woolly Mammoth Reveal Deep Speciation of Forest and Savanna Elephants
Source: PubMed Central journal article supplement (PMC3006346; doi:10.1371/journal.pbio.1000564), 2010-12-21
Supplement: pbio.1000564.s001.pdf [file pbio.1000564.s001.pdf]

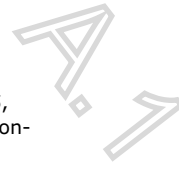

**Target and primer information for experimental round A.1:** read ID corresponds to the read in the short read archive SRA010805, beside primer sequences PCR product length with and without primers is given, as well as the percent identity of the respective mastodon-loxAfr1 alignment, "# of hits isPCR" gives a number how often the respective primer pair anneals to loxAfr1, and a "yes" in the row "consensus for all taxa" means, that sequence information is available for all taxa. The last two rows show scaffold ID and position of the targets used in the MCMCcoo analysis aligned to loxAfr3.

| target ID | read ID GenBank SRA010805 | F-Primer 5'-3'           | R-Primer 5'-3'           | product length in bp amplicon | product length in bp w/out primer | Mastodon-loxAfr1 alignment % identity | # of hits isPCR loxAfr1 | consensus for all taxa | aligned loxAfr3 scaffold ID | loxAfr3 scaffold position |
|-----------|---------------------------|--------------------------|--------------------------|-------------------------------|-----------------------------------|---------------------------------------|-------------------------|------------------------|-----------------------------|---------------------------|
| A001      | EK3X9LI01BLRFR            | TGGTCTCGAAGTCAGACAAGAG   | TCAGGACTTGCCTGTTCACT     | 186                           | 143                               | 0.98                                  | 2                       | yes                    | 50                          | 16,857,885                |
| A002      | EK3X9LI02F3RBB            | GCATTITGATTCGATGTTTGA    | AAATITGAGATCTGTCCCAG     | 190                           | 147                               | 0.98                                  | 6                       |                        |                             |                           |
| A003      | EK3X9LI02HKE1R            | TATAGTCCAGGCTCCACGG      | ATAAGCAGTCAAGAGCCCGA     | 161                           | 121                               | 0.95                                  | 0                       | yes                    | 13                          | 31,772,950                |
| A004      | EK3X9LI01DC8H2            | TGTTGTAGGTGCCATCGAG      | CGGAAAAGAGGAAGCCCTC      | 161                           | 121                               | 0.97                                  | 64                      |                        |                             |                           |
| A005      | EK3X9LI01BHMHV            | GCCCATGTCAATCAACAGAA     | TGGCCCTCTCTATGTGT        | 194                           | 154                               | 0.92                                  | 93                      |                        |                             |                           |
| A006      | EK3X9LI01A2011            | AGGCGAGAATACGCTCAAA      | GCTCCTACTCTGGGCTAT       | 184                           | 144                               | 0.89                                  | 435                     |                        |                             |                           |
| A007      | EK3X9LI01C7BYB            | TTTTCTGTGTTTGTGCATGT     | AGTAATGGAAGAAATGATGAAGT  | 172                           | 127                               | 0.90                                  | 21                      | yes                    |                             |                           |
| A008      | EK3X9LI01CV00E            | GAACACGGTITCCAGGAATG     | GGGTCTGACAGAGTGGGA       | 161                           | 121                               | 0.90                                  | 3                       |                        |                             |                           |
| A009      | EK3X9LI01C7XBW            | TTTTCTATTCCTAGTAAGAACCA  | CAAAACAATTTGAGAAAACAGTC  | 156                           | 109                               | 0.92                                  | 4                       | yes                    | 11                          | 58,944,724                |
| A010      | EK3X9LI01DQLE4E           | AGATGAAAACGGGGAGGCTT     | GCAGCAGCGGAATTTACTT      | 181                           | 141                               | 0.98                                  | 27                      |                        |                             |                           |
| A011      | EK3X9LI01AQJCF            | GCTTCATTCTGTGTGCGTG      | ACTCTGCTGTGTGATGCTGG     | 136                           | 96                                | 0.98                                  | 8                       | yes                    | 12                          | 23,353,795                |
| A012      | EK3X9LI01BCGQI            | CACTCCAGCACACCAGAC       | GAGTGGGTTCATTGTCAACA     | 152                           | 113                               | 0.98                                  | 1                       | yes                    | 4                           | 2,618,296                 |
| A013      | EK3X9LI02G5E9S            | CAATGCCCTGAAACCAGTCC     | GTAGGGCGGAGCTATGATGG     | 188                           | 149                               | 0.96                                  | 807                     |                        |                             |                           |
| A014      | EK3X9LI01A1IP7            | CTTCTCTGGGCAAGTCCA       | CATCCTCCCAACCTTTCAA      | 145                           | 105                               | 0.87                                  | 0                       | yes                    | 4                           | 598,729                   |
| A015      | EK3X9LI02JWLQA            | GAGTACCAGGAGGGGGGAG      | TCATCTCAGTACCAAACTTGA    | 192                           | 149                               | 0.88                                  | 1                       |                        |                             |                           |
| A016      | EK3X9LI01EN54P            | TGGGACCAAGCAGACCTTAC     | CTGTGGCATGTGGAACAAA      | 151                           | 111                               | 0.99                                  | 4                       | yes                    | 34                          | 682,004                   |
| A017      | EK3X9LI02I9G0E            | CTGCTCTGCCCAACTTCT       | CAGTCTGTGGGATGCTGT       | 177                           | 137                               | 0.98                                  | 2                       | yes                    | 3                           | 71,685,234                |
| A018      | EK3X9LI02GC7NK            | CCATGGAGGACAGGTTTCCAG    | AAGCGACTCTTCTCAGTCA      | 193                           | 152                               | 0.94                                  | 334                     |                        |                             |                           |
| A019      | EK3X9LI01COK93            | AACCACCATTGTCCACTTGG     | CAGCTGCCAGCAACAATG       | 145                           | 107                               | 0.99                                  | 1                       | yes                    |                             |                           |
| A020      | EK3X9LI02F9G0Q            | GAATAACATCAGACGGTGGC     | TAGCTGGAAGCTCTTGCCTGG    | 173                           | 133                               | 0.97                                  | 0                       |                        |                             |                           |
| A021      | EK3X9LI01CTJ2Y            | GCTTACCACACACAATCCCC     | AGAAATGACCATGAGCGGG      | 166                           | 126                               | 0.93                                  | 3                       | yes                    | 3                           | 18,742,916                |
| A022      | EK3X9LI02H02GU            | ATACAGGAGGGATCCTTGGG     | ACTCACATATCCCCTGGTGG     | 163                           | 123                               | 0.96                                  | 1233                    |                        |                             |                           |
| A023      | EK3X9LI02GCTKJ            | TGACATGTGCAAAAGAGCTTAC   | TGTTCTCTGCTGCTTAAAT      | 149                           | 109                               | 0.96                                  | 269                     |                        |                             |                           |
| A024      | EK3X9LI01EVLQJ            | TGTCTCTCCCTCCACTCTC      | GATTGGACTGGAAATGGGT      | 172                           | 132                               | 0.94                                  | 1322                    |                        |                             |                           |
| A025      | EK3X9LI01C4P1K            | GAATTAATTTGCCAATGACTAGA  | GGTAGGGAAGCAACACTC       | 170                           | 123                               | 0.96                                  | 2257                    |                        |                             |                           |
| A026      | EK3X9LI02FFWKW            | CCCAGCACTTAAACAATCTTAAA  | AACTAACATGTCAGCTTGC      | 198                           | 152                               | 0.98                                  | 3                       | yes                    |                             |                           |
| A027      | EK3X9LI01CDWFL            | CGTGGGTAGAGAAGGACGAG     | ATTATTCGTCCGGGAGG        | 133                           | 95                                | 0.97                                  | 800                     |                        |                             |                           |
| A028      | EK3X9LI02IGAJD            | CACAGCCAGAAGCCTCC        | GGATCTGCTGAGCAAGGCG      | 158                           | 120                               | 0.93                                  | 1807                    |                        |                             |                           |
| A029      | EK3X9LI02H3CND            | CGTTGCTTGTGAAAGTGA       | TCCTTGACAACCTCAATCTTTCTC | 166                           | 121                               | 1.00                                  | 0                       |                        |                             |                           |
| A030      | EK3X9LI02HH3QY            | AGCAAAAATTACTCAAGTGGAAA  | GTGAAAATGGAGCCAAAG       | 164                           | 121                               | 0.93                                  | 55                      |                        |                             |                           |
| A031      | EK3X9LI02GL1UM            | TGTTGAAAAGCAAGATGCTACT   | TTTGCCAAACCATAATTCAA     | 150                           | 106                               | 0.93                                  | 270                     |                        |                             |                           |
| A032      | EK3X9LI02G4ANS            | AATAGGCCGGAAGGGAAGT      | TTTTCTCCGAAAATCTCCGTT    | 156                           | 116                               | 0.94                                  | 5                       |                        |                             |                           |
| A033      | EK3X9LI01B83XL            | TGACTGACCAAGCAAGGCTC     | GCAACATCATGATAAGTGGAGAA  | 195                           | 152                               | 0.97                                  | 1                       | yes                    | 146                         | 1,412,236                 |
| A034      | EK3X9LI01AEV4R            | GGTACCAAACTTGGCAT        | GCTGTGTGGAGTTAGGGACC     | 170                           | 131                               | 0.98                                  | 1                       | yes                    | 14                          | 7,155,272                 |
| A035      | EK3X9LI01A6LR5            | CACCTTACTCCGTACTCCA      | CACCTGAGACTGTGTGGCA      | 145                           | 105                               | 0.93                                  | 748                     |                        |                             |                           |
| A036      | EK3X9LI01AHA1X            | CATGAAAATGCTGTTAAAACCC   | TCACTGTAATCTTCACTCTCCA   | 170                           | 123                               | 0.99                                  | 5                       | yes                    | 3                           | 65,357,915                |
| A037      | EK3X9LI01DFI3G            | CAGTTGGTCACTGCGGGT       | GACTGCTAGGCCCTTCTCC      | 149                           | 109                               | 0.94                                  | 1                       |                        |                             |                           |
| A038      | EK3X9LI02IMKVX            | AGGGATCAATGTTGTTTCA      | TCITCCCACTTCTCAGAG       | 135                           | 93                                | 0.97                                  | 2                       | yes                    | 9                           | 48,548,100                |
| A039      | EK3X9LI02IRFTU            | TCCCAAGTCAACTAGATACTCTA  | GGAAAAGGCTCCTTCTCTGT     | 194                           | 149                               | 0.95                                  | 2                       |                        |                             |                           |
| A040      | EK3X9LI02JSOT0            | AAGGCCACTCTTGGCTTCT      | GTTTGTCTCAAAGCTGGGG      | 174                           | 134                               | 0.97                                  | 2                       |                        |                             |                           |
| A041      | EK3X9LI01AIALH            | TGTGTGCAGGAAGATGTGTC     | ATTCCGCTGCTGTTTGTAT      | 155                           | 114                               | 0.94                                  | 895                     |                        |                             |                           |
| A042      | EK3X9LI01BE9T9            | GACATCCAACAATTTTCAGGC    | TGGAAGGTGCTCAGTCTTA      | 186                           | 145                               | 0.99                                  | 0                       | yes                    | 23                          | 26,582,346                |
| A043      | EK3X9LI02FIY9W            | GAAGAGACTGGGAGAGCAGC     | CACACTATGCTGTCAGGGCA     | 176                           | 136                               | 0.90                                  | 28                      |                        |                             |                           |
| A044      | EK3X9LI02GFDDJ            | GTGGGTCTACAATCACCCG      | CACAGTGTGAAAGCGGAA       | 147                           | 107                               | 0.95                                  | 0                       | yes                    |                             |                           |
| A045      | EK3X9LI02I66QU            | TGGACTGCAAAAAGAAATGA     | CCATCTCATTAAGGCCCTTCT    | 190                           | 148                               | 0.96                                  | 11                      |                        |                             |                           |
| A046      | EK3X9LI01A3SP9            | GCTGCAGCTGCTTGAATAA      | TGATGCAGTGGTTGAGGTGT     | 184                           | 144                               | 0.99                                  | 1                       | yes                    | 29                          | 18,322,968                |
| A047      | EK3X9LI01AZEP9            | GGGACTCTAGGCAAACTCCAG    | AAACTGCACCTGGCCATTG      | 151                           | 110                               | 0.93                                  | 1                       | yes                    | 7                           | 8,254,015                 |
| A048      | EK3X9LI02GRG6Q            | AGGGGAACCATGTCTGTAT      | GAACTGGACAGCTGTGGTT      | 158                           | 118                               | 0.96                                  | 1                       | yes                    | 86                          | 2,349,909                 |
| A049      | EK3X9LI02H25M7            | TGTTGTGTTAGGTGCTGTGG     | GACCTCAAGGATGGTGTG       | 154                           | 113                               | 0.87                                  | 15                      |                        |                             |                           |
| A050      | EK3X9LI02JDDAK            | AGGAATCGGGTGAAGTGTG      | CCACCTAAAAGGGACCCAA      | 146                           | 106                               | 0.98                                  | 1                       | yes                    | 27                          | 20,268,499                |
| A051      | EK3X9LI01AX9UU            | TTGTGATCAGAGTTTGGCG      | ACACTCGAGGGGCTCAAC       | 191                           | 153                               | 0.95                                  | 1                       |                        |                             |                           |
| A052      | EK3X9LI02G8P4Z            | GTCTCTTCTGATGGTGGCT      | CATGTGGAGAACTTCTTTG      | 157                           | 116                               | 0.98                                  | 2                       | yes                    | 1                           | 78,994,943                |
| A053      | EK3X9LI01E2Y6Z            | TTGCCAACATCAAACTCAA      | TGTTAAAACCAAGATGTCCAC    | 149                           | 105                               | 0.96                                  | 4                       |                        |                             |                           |
| A054      | EK3X9LI01E21TS            | CGACTCAACACATCAAGCAAA    | TCCCTCAATTCACAGCAT       | 163                           | 122                               | 0.96                                  | 0                       | yes                    | 37                          | 16,375,505                |
| A055      | EK3X9LI02J0R29            | GCTGAGCAAATAATCTGAGAACC  | CTGAAGGCTGTGGTCTTTGA     | 168                           | 125                               | 0.97                                  | 0                       |                        |                             |                           |
| A056      | EK3X9LI02JVJWB            | TTTGGGTTAAATGGACAGCC     | TTCTGCAATAAAGATTTGGC     | 147                           | 107                               | 0.99                                  | 0                       | yes                    | 22                          | 15,681,214                |
| A057      | EK3X9LI01DC6HA            | AGCTCCAAGCCTATGCTGG      | CTCGGCTGACTTCACTTCC      | 191                           | 151                               | 0.96                                  | 0                       | yes                    | 75                          | 5,427,047                 |
| A058      | EK3X9LI01CQ7ZA            | AACCCATCTGCGTACTGAAAG    | TCITTCATTTGGGAAAGATTTGA  | 189                           | 143                               | 0.94                                  | 76                      |                        |                             |                           |
| A059      | EK3X9LI01BDI18            | GCCAGAATGCTCTTATGATGC    | ATGCTTAGGCCATTATTTG      | 159                           | 117                               | 0.99                                  | 0                       |                        |                             |                           |
| A060      | EK3X9LI02F0L3R            | GCCAAAGTGGCAGCTTTTTA     | TAGGAGGCCAATGAGAGCAT     | 172                           | 132                               | 0.91                                  | 5                       |                        |                             |                           |
| A061      | EK3X9LI02HQFHE            | TGGTTAAGAGCTCAGGCTGC     | ACTCACTGCCATCGAGTCAA     | 134                           | 94                                | 0.92                                  | 20                      |                        |                             |                           |
| A062      | EK3X9LI02JWOIR            | TTTTGTTGGTTTCGGTGGT      | GCTCCCAATGATTAAGTGT      | 177                           | 135                               | 0.95                                  | 5                       |                        |                             |                           |
| A063      | EK3X9LI01BCKUW            | ATGGCTGACGATGTCATTTG     | CACACAGGTGAATGTCTTTGC    | 175                           | 134                               | 0.90                                  | 1                       |                        |                             |                           |
| A064      | EK3X9LI02HHRV7            | TAGCAAACTCTTGGCTGCT      | CTCGAGTCACTCTTGCAGA      | 149                           | 109                               | 0.97                                  | 1                       |                        |                             |                           |
| A065      | EK3X9LI01C7PXN            | ATGGTGTGGGAGCTTTGAC      | AGAAAACAGACTGCGTGCT      | 166                           | 126                               | 0.98                                  | 1                       |                        |                             |                           |
| A066      | EK3X9LI01C28PT            | TCTAGGGACTGGACCTCTCT     | TGCATAAAAAGATGGCAATGAA   | 181                           | 138                               | 0.92                                  | 1                       |                        |                             |                           |
| A067      | EK3X9LI01BV10S            | ACTATCTGCCAGGGCAAC       | GTTTTAGTGGAAAGGCTTG      | 183                           | 144                               | 0.91                                  | 4693                    |                        |                             |                           |
| A068      | EK3X9LI01BBL1X            | TGGAGGAAGCTACTACGGCT     | GCACCCAGGAATATAGCAAAGT   | 170                           | 126                               | 0.97                                  | 89                      |                        |                             |                           |
| A069      | EK3X9LI02II2C9            | TCAGTTAAACCCACATCTGTCT   | GCTCCCTTTCCTTCTTCT       | 202                           | 159                               | 0.94                                  | 3                       | yes                    | 5                           | 70,359,926                |
| A070      | EK3X9LI01AG83P            | ATTTCTCTGGGCAGCGTGT      | GTCTCTTTCTTCTGGCGCTG     | 174                           | 135                               | 0.91                                  | 31                      |                        |                             |                           |
| A071      | EK3X9LI02HHLB0            | CCAATGCCATTAATAACAGAAA   | TTATGAAAGTGAATAGCACAGAAA | 181                           | 134                               | 0.98                                  | 3                       | yes                    | 0                           | 116,134,150               |
| A072      | EK3X9LI02JM0Q8            | CTGACGAAAGCGGTTAGAGG     | CAAAGCGAGCTTACATTA       | 181                           | 141                               | 0.97                                  | 4158                    |                        |                             |                           |
| A073      | EK3X9LI01C26R9            | ACTGCATGTGCGTCACTTGT     | CGTGGAGTACTGGCGG         | 155                           | 117                               | 0.96                                  | 1652                    |                        |                             |                           |
| A074      | EK3X9LI02HUA09            | GCTCAGAGTTTGTGACCCGT     | CCGACATCCTTCTTCTGTC      | 169                           | 129                               | 0.96                                  | 749                     |                        |                             |                           |
| A075      | EK3X9LI01DSV6G            | CACCTGAGGGACTGAGTGTG     | TTTGCTACAGAAAAGTCAAACA   | 171                           | 127                               | 0.90                                  | 4                       | yes                    | 41                          | 12,064,693                |
| A076      | EK3X9LI02FH2ZJ            | CAAAATTTCACTGGCAATTCATCA | AGATCAGCCCAAGGGTTTT      | 197                           | 155                               | 0.95                                  | 3                       | yes                    | 4                           | 65,387,475                |
| A077      | EK3X9LI01CPQ0Z            | GGACTGGAAGCAAAAACCT      | GCTTAAGGCATTTGTGAAATCAT  | 206                           | 163                               | 0.99                                  | 3                       | yes                    | 4                           | 86,446,334                |
| A078      | EK3X9LI01C26GN            | GCGGATTCCTGTGTATGTTG     | TGCTGAGAGTGTGTGTGTC      | 167                           | 127                               | 0.94                                  | 6                       | yes                    | 19                          | 27,050,379                |
| A079      | EK3X9LI02H07QM            | GCAGACTCTGGAAGCTGCTGG    | AAAGGAGAGCACAGGCAAG      | 155                           | 116                               | 0.90                                  | 1848                    |                        |                             |                           |
| A080      | EK3X9LI01B9LJB            | ATAGGCCGAGTAGAGGAGC      | ATTCTGGCCTGTGGGACTCT     | 160                           | 120                               | 0.92                                  | 768                     |                        |                             |                           |
| A081      | EK3X9LI01DKF6W            | GAGGCAATGTTTCCACCCC      | ATGAAAGTATCGGGACCTTG     | 162                           | 123                               | 0.99                                  | 1272                    |                        |                             |                           |
| A082      | EK3X9LI02GF929            | AAAACACAGAGCCAAAGTGGTG   | CAGATCTTGAATGGGCCAC      | 157                           | 117                               | 1.00                                  | 2                       | yes                    | 6                           | 941,096                   |
| A083      | EK3X9LI01D541S            | TCTTGTCTTGGGACGGATAC     | ATGACGGGCTTCTTCTTCT      | 171                           | 131                               | 0.97                                  | 0                       | yes                    | 69                          | 2,270,628                 |
| A084      | EK3X9LI01BVAL0            | GCATGTGTGAGCTCTTCCCT     | GCAGGATCTTCTGCTGCTC      | 148                           | 108                               | 0.97                                  | 2                       | yes                    | 123                         | 1,527,368                 |
| A085      | EK3X9LI02FPCGC            | GCTCCACTGTGTGAGTCAATCA   | TGCTGACAGACAGAAAGAA      | 165                           | 123                               | 0.92                                  | 1                       | yes                    | 173                         | 542,484                   |
| A086      | EK3X9LI01BLH35            | ACACCTCTGAGCTTCCCTGA     | TGCTGTGTGACTCTCTTG       | 154                           | 114                               | 0.98                                  | 0                       | yes                    |                             |                           |
| A087      | EK3X9LI02HI18H            | AATTTGCAAGGCTCAGTGTCT    | CTGCCGTTCTCTACTCAGG      | 169                           | 129                               | 0.95                                  | 1                       | yes                    | 11                          | 66,322,536                |

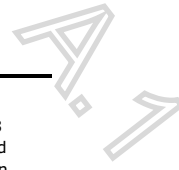

| target ID | read ID GenBank SRA010805 | F-Primer 5'-3'          | R-Primer 5'-3'           | product length in bp amplicon | product length in bp w/out primer | Mastodon-loxAfr1 alignment % identity | # of hits isPCR loxAfr1 | consensus for all taxa | aligned loxAfr3 scaffold ID | loxAfr3 scaffold position |
|-----------|---------------------------|-------------------------|--------------------------|-------------------------------|-----------------------------------|---------------------------------------|-------------------------|------------------------|-----------------------------|---------------------------|
| A088      | EK3X9LI02JBXZW            | TGCTGTGTGCAAAAGCCTGAG   | AACGGCAATCCCATTTTACA     | 154                           | 114                               | 1.00                                  | 1                       | yes                    |                             |                           |
| A089      | EK3X9LI02IOGIR            | TGCAGGTATCAGGAAGACCC    | TTTACTGCCTGCACCTTCGTG    | 185                           | 145                               | 0.89                                  | 1                       |                        |                             |                           |
| A090      | EK3X9LI01AVFGZ            | TACATTCGCCTACCTCCCTG    | TGGGCAGGATTCATAGGAG      | 174                           | 134                               | 0.95                                  | 1                       | yes                    |                             |                           |
| A091      | EK3X9LI02HYK2I            | CCTTCTGACCTCGGAAGTA     | CATTTCACCCAGATCCAC       | 154                           | 114                               | 0.96                                  | 1                       | yes                    | 48                          | 3,590,814                 |
| A092      | EK3X9LI02GY7B7            | GTAGGCTTCCAGGGTGTG      | CATGGAGACAGTCCCACCAC     | 148                           | 108                               | 0.98                                  | 1548                    |                        |                             |                           |
| A093      | EK3X9LI02F4X94            | GACTTCTCCTACCGGCTGC     | CGAAGTACTACGGGGAAGCA     | 163                           | 124                               | 0.99                                  | 239                     |                        |                             |                           |
| A094      | EK3X9LI01ET8NT            | CAGACATCAGGATCTGGAGG    | TCCATGGGGTAACTTTTGAA     | 161                           | 119                               | 0.99                                  | 2                       | yes                    | 61                          | 591,902                   |
| A095      | EK3X9LI01C591E            | GGGAAGCAAGAGGTCATTA     | TGGGCTAGGCACACCTTAGT     | 177                           | 135                               | 0.96                                  | 10                      |                        |                             |                           |
| A096      | EK3X9LI02ITBQL            | TTGGAGCTTTGATGTCCAT     | AACACCTTGCCTCTTAAG       | 167                           | 127                               | 0.96                                  | 2                       |                        |                             |                           |
| A097      | EK3X9LI02JWQHI            | ATGCCCCCTCCTGAGATAAT    | TCTGCGGTACATAGGGCTG      | 170                           | 131                               | 0.96                                  | 1                       | yes                    | 13                          | 5,005,567                 |
| A098      | EK3X9LI01A8R7J            | CACCCATGGAAGAGCAGTC     | CCTTATTCATTGTCCAGCATCA   | 180                           | 138                               | 0.99                                  | 1                       |                        |                             |                           |
| A099      | EK3X9LI02IKMWQ            | AGCAGGTGTTGAGTGTGTG     | GTGCTTGGCCTAGGAAACAA     | 181                           | 141                               | 0.94                                  | 1                       | yes                    | 44                          | 3,564,342                 |
| A100      | EK3X9LI01CU5LO            | GAGGTTGCATCTGCCAC       | GAGAGAGCCTAGAGACGGCA     | 168                           | 130                               | 0.90                                  | 515                     |                        |                             |                           |
| A101      | EK3X9LI02IYRPJ            | AGAAGTCACTGTAAAGTCGGAA  | ACTGGCTTTTGGCAAAATCA     | 186                           | 144                               | 0.96                                  | 2                       | yes                    | 4                           | 15,013,685                |
| A102      | EK3X9LI01EAN2W            | GGCTAGACATTTGGTTTCAGT   | CCCTTGGCCATGCTGTGAT      | 176                           | 134                               | 0.99                                  | 5                       |                        |                             |                           |
| A103      | EK3X9LI01DG80A            | GGTGTGTGCTGAGAAGGTGA    | ATTCGCTGCTGCTTTGTAT      | 143                           | 103                               | 0.94                                  | 1353                    |                        |                             |                           |
| A104      | EK3X9LI01D826E            | TTCAGAGTACTTCTGGCTCC    | GCCAACTTTCAGACAGGGA      | 156                           | 116                               | 1.00                                  | 32                      |                        |                             |                           |
| A105      | EK3X9LI02HUL5N            | GGGGAAGAATCTAGGGTCCA    | ACTAGCTGCGCACCCACTC      | 176                           | 136                               | 0.97                                  | 1                       | yes                    | 11                          | 7,758,960                 |
| A106      | EK3X9LI01DD6LB            | TCAGCTGATCTGAGTGCACAA   | TACAGGATGCACGAGGCATA     | 170                           | 128                               | 0.95                                  | 5                       |                        |                             |                           |
| A107      | EK3X9LI02JTI0F            | GAAGCATTTGAAATAGTGCCT   | TTGGACTTTTAAACCATCTACCTG | 172                           | 126                               | 0.98                                  | 1                       | yes                    | 34                          | 1,459,684                 |
| A108      | EK3X9LI02GWF6A            | CACITGGCCAGGACGAAACAG   | GGCCACACAGATCACAGA       | 180                           | 140                               | 0.97                                  | 23                      |                        |                             |                           |
| A109      | EK3X9LI01CREZQ            | GCAGGCACACAAGGGGCTCT    | GGCGCGGGGCTAGATTT        | 133                           | 95                                | 0.93                                  | 1                       | yes                    | 34                          | 3,759,193                 |
| A110      | EK3X9LI01D0Z43            | TAGATGAAAACCCCGCATTCT   | GCTGGGTCAACTAATTTGGAATA  | 183                           | 140                               | 0.97                                  | 0                       |                        |                             |                           |
| A111      | EK3X9LI02HJ5E6            | CGTGTGTTGGACGAGCTGTA    | GCCTCTGGATTTGGTTTGA      | 171                           | 131                               | 0.98                                  | 1                       |                        |                             |                           |
| A112      | EK3X9LI01D2RKE            | GTCTGCTTTGAAGGGAGCAG    | CCCATAGGGTTTCCAAGGAG     | 161                           | 121                               | 0.98                                  | 0                       | yes                    | 75                          | 7,727,987                 |
| A113      | EK3X9LI02G11JT            | GACCTCACTGGTCTTGGCTC    | CTTGGCAAGAGCAGTGTTC      | 176                           | 136                               | 0.97                                  | 2                       | yes                    | 53                          | 15,437,941                |
| A114      | EK3X9LI02FWX64            | CTAGTTTCTCCACAGCCCTCG   | TTTTGGCTGAGCAATTTGG      | 175                           | 135                               | 0.98                                  | 1                       |                        |                             |                           |
| A115      | EK3X9LI01ANZ5L            | ATAAGCCCGCTACTCTTC      | ACCGGCCACATTAATTTTT      | 150                           | 110                               | 0.96                                  | 15                      |                        |                             |                           |
| A116      | EK3X9LI01BAG0E            | GGAAAGTCAAGCTAATTTGGA   | TGGGATGCAGAATTTTTCA      | 166                           | 126                               | 0.98                                  | 235                     |                        |                             |                           |
| A117      | EK3X9LI01EFDHQ            | CAGGAGCCAGAGCTTGGAAA    | TCTGTGTTGCACTGTAGCC      | 178                           | 138                               | 0.99                                  | 1                       | yes                    | 86                          | 4,337,419                 |
| A118      | EK3X9LI02ITWWD            | ACCTTGAGCACCTTCCCTT     | TCCTTAGTCCCTGTTGTGG      | 176                           | 136                               | 0.98                                  | 335                     |                        |                             |                           |
| A119      | EK3X9LI01AOC2E            | GCTGTGACAGTCTGAAATTTG   | TTGCCGTTTATGTTGGTGA      | 159                           | 119                               | 1.00                                  | 1652                    |                        |                             |                           |
| A120      | EK3X9LI01BVY8E            | CCCACACTCACATCCCT       | TTCACTGCCTGCCTATTC       | 145                           | 107                               | 0.93                                  | 70                      |                        |                             |                           |
| A121      | EK3X9LI02F5KTB            | GCTGCTTCCAGTCTCTTC      | GACTTCAACCAGCCCTCTG      | 194                           | 155                               | 0.92                                  | 147                     |                        |                             |                           |
| A122      | EK3X9LI01ETJ69            | GTTCACACTCACAGCAACC     | CTGCAAGACCCAGGAATTA      | 151                           | 111                               | 0.98                                  | 3                       | yes                    | 3                           | 37,511,028                |
| A123      | EK3X9LI02I0H9I            | GTGGAGCGGCTTCTCTGA      | ACGGATAGATTTAGTGGGT      | 186                           | 148                               | 0.99                                  | 1                       | yes                    | 94                          | 3,410,871                 |
| A124      | EK3X9LI02IJEPM            | CGAACCCAAGATTGGTAGGA    | GGGCTTTTGCTAGTTCTGGA     | 171                           | 131                               | 0.93                                  | 9                       |                        |                             |                           |
| A125      | EK3X9LI01EHT4U            | TGATCAGGGCTCCTAGGTTG    | TGTTCAAGTGCAGACTTTG      | 174                           | 133                               | 0.97                                  | 1                       |                        |                             |                           |
| A126      | EK3X9LI01EBDG8            | AACTAAAACAAGAGCCGCC     | TCTCTGCTGAGACTGCC        | 189                           | 149                               | 0.97                                  | 1                       |                        |                             |                           |
| A127      | EK3X9LI01BJV3L            | TGCGATTTCTCAAATGAAAGA   | TCATATGCTGCTCCTGAAA      | 184                           | 142                               | 0.95                                  | 4                       | yes                    |                             |                           |
| A128      | EK3X9LI02FXPPF            | GGTTTGAGTCCATCCAGAGG    | TGTGTTCTGTGTGTGACCA      | 165                           | 124                               | 0.92                                  | 4                       | yes                    | 190                         | 544,216                   |
| A129      | EK3X9LI02IM99N            | CTGACCTAGGCTGCCTCTG     | CAGAGAAGCCTCAGCCCC       | 169                           | 131                               | 0.88                                  | 279                     |                        |                             |                           |
| A130      | EK3X9LI02H1ZVD            | TCCCATGTGGTCTGACAGT     | AGGTTAGTACCCACCCCTCC     | 161                           | 121                               | 0.88                                  | 2                       |                        |                             |                           |
| A131      | EK3X9LI01C1TEE            | ATAGCCTGTTCCAGGAGGC     | CCTTGTAGGCTGAGGGAAAC     | 163                           | 123                               | 0.97                                  | 1                       |                        |                             |                           |
| A132      | EK3X9LI02JZRK0            | TCCAAGTCAATTAAGCCGCAC   | TCTCAAGACATTAGCCAGTGA    | 150                           | 108                               | 0.96                                  | 52                      |                        |                             |                           |
| A133      | EK3X9LI02F6FN8            | TTCTGATCTATGGCTCGGTG    | TTATGCCCTTTTGAAGGGGG     | 163                           | 122                               | 0.96                                  | 1                       | yes                    |                             |                           |
| A134      | EK3X9LI01DOC2A            | TGGCATTAGTGGTGTGTG      | TGCCAGGAATGACAAATAAA     | 173                           | 132                               | 0.93                                  | 507                     |                        |                             |                           |
| A135      | EK3X9LI01C8N0Q            | CTGTGTTTCCCAAGCAAGT     | AAAGGAGCTTTCTCCCTC       | 157                           | 117                               | 0.98                                  | 4129                    |                        |                             |                           |
| A136      | EK3X9LI02I36U7            | CTAGCAGGCTGGGGCTGT      | CCCCCAGAAAGTCACTTTGT     | 184                           | 146                               | 0.97                                  | 0                       |                        |                             |                           |
| A137      | EK3X9LI01EDFZR            | ATGTCAGATGGATCCTGGCT    | AGGTTCTCATGAGCACAATTA    | 163                           | 121                               | 0.94                                  | 1232                    |                        |                             |                           |
| A138      | EK3X9LI02GH9IC            | CCCAGCCCTAGACATT        | GGTTCAAGGCTCTCGCTG       | 166                           | 127                               | 0.93                                  | 3                       | yes                    |                             |                           |
| A139      | EK3X9LI01DWNEV            | CAGCAGTGTCAAGGCGAGT     | TGGCCTTCACTTCACTTACC     | 181                           | 141                               | 0.97                                  | 701                     |                        |                             |                           |
| A140      | EK3X9LI02INCWL            | AATCTTAGCTCCTCAAAGCGC   | TGGCTGACCCCAATACAGTA     | 159                           | 118                               | 0.97                                  | 1                       | yes                    | 9                           | 48,345,794                |
| A141      | EK3X9LI02GMTFT            | CCTCAAGTCTGAGGACCTT     | TTTTAACTCTGAGCCCTC       | 170                           | 130                               | 0.95                                  | 1                       | yes                    | 69                          | 9,882,985                 |
| A142      | EK3X9LI02GNGBB            | ACTCTGCAAGGCGGTACATC    | ATCAGATAAATACGCCGAC      | 165                           | 125                               | 0.99                                  | 1                       |                        |                             |                           |
| A143      | EK3X9LI02GKZUQ            | TTATTGGCCAGTGTGAGG      | TTGAAGAAGAATGGGGCATC     | 189                           | 149                               | 0.96                                  | 70                      |                        |                             |                           |
| A144      | EK3X9LI02GYYTB            | ATGGCTGCAAAATTAAGTGG    | GATCGGACTTAGGAGCCC       | 184                           | 145                               | 0.98                                  | 1                       | yes                    | 5                           | 24,165,720                |
| A145      | EK3X9LI02G8NUG            | CCCCTCTCTGTGTTTGTGA     | GATGTGTTTCAATAAGACTCAGTA | 153                           | 108                               | 0.95                                  | 5                       | yes                    | 3                           | 70,689,859                |
| A146      | EK3X9LI01E5Q3R            | TGAGTATCTTCCACCTGGC     | CGAGCCAGCAAAATAGGTAG     | 162                           | 122                               | 0.96                                  | 1                       | yes                    |                             |                           |
| A147      | EK3X9LI02IQHZQ            | AACATAGGCCCGAACGGT      | CTTGTTTCTGACCGGT         | 161                           | 125                               | 0.91                                  | 61                      |                        |                             |                           |
| A148      | EK3X9LI01BADUP            | AGGGCCCTAGGATTTTCAGA    | GCTGGCTACACTGAACCCA      | 194                           | 154                               | 0.96                                  | 3                       | yes                    | 72                          | 1,311,673                 |
| A149      | EK3X9LI01CEAIR            | GTCCTGATGGGAACACAAC     | TGTCTGGGAATGGTTCTGT      | 174                           | 134                               | 0.94                                  | 100                     |                        |                             |                           |
| A150      | EK3X9LI02FF96G            | GGTTCCTCATGAGCAAAATTAAG | GATCTGGCTGAAAGCAGAG      | 152                           | 109                               | 0.96                                  | 17                      |                        |                             |                           |
| A151      | EK3X9LI01E0TRO            | TGTACGTGGCAAGAGGTTGA    | AAGGAGGACACAGGCAGAT      | 191                           | 151                               | 0.92                                  | 1527                    |                        |                             |                           |
| A152      | EK3X9LI01EPXIX            | TCTTTGAATATGGTGTGGTGA   | TCCAAGGAGTGGTCTCTCTG     | 169                           | 125                               | 0.93                                  | 6                       |                        |                             |                           |
| A153      | EK3X9LI02INS8N            | GGAGAAAAGTGGGATGCGA     | CATGCTCACCAGTATCATTT     | 193                           | 151                               | 0.91                                  | 196                     |                        |                             |                           |
| A154      | EK3X9LI02FZCNA            | CCGCAATAAAATGAGTCTGG    | GCTAGCTGAATGAACGGG       | 176                           | 135                               | 0.95                                  | 3                       | yes                    |                             |                           |
| A155      | EK3X9LI02G11L8            | ACACTGGAGCACAGGCAAG     | CACGTACCTCAAGGTGCTCA     | 183                           | 144                               | 0.93                                  | 0                       | yes                    | 8                           | 42,387,873                |
| A156      | EK3X9LI01CD6WH            | GTCCCCAGTCTGCTCT        | ATGGGGGCACAGTGTTAAG      | 183                           | 145                               | 0.93                                  | 2                       | yes                    | 97                          | 3,528,068                 |
| A157      | EK3X9LI02GUVFP            | AGGCAAGAATAGAGGAGCCC    | TGCTGTGGGACTCTATTGG      | 183                           | 143                               | 0.88                                  | 780                     |                        |                             |                           |
| A158      | EK3X9LI02GM7LC            | CTTGGGTCAAGTGCACCTTT    | GAATCCACAATTTGACACCA     | 151                           | 111                               | 0.91                                  | 6                       |                        |                             |                           |
| A159      | EK3X9LI01B76F7            | CAGCGCTCCTCGCCGAC       | GCGTCGCCAGGGGACACCAC     | 147                           | 108                               | 0.96                                  | 10                      |                        |                             |                           |
| A160      | EK3X9LI02IKVA4            | ATAGCAACCTTGCACAAC      | GACACAGTGGCTGCAACAAT     | 162                           | 122                               | 0.96                                  | 0                       |                        |                             |                           |
| A161      | EK3X9LI02F8K36            | ATCTTGTCTCCGGGAATCG     | CATACGCTGAACGGAGATT      | 190                           | 151                               | 0.92                                  | 1076                    |                        |                             |                           |
| A162      | EK3X9LI02HLJ9S            | GGTCAGGCCACCTTAGTCT     | CAAGGATTTTCAATTTGCTTGG   | 156                           | 115                               | 0.99                                  | 14                      |                        |                             |                           |
| A163      | EK3X9LI02I2Z3L            | CTGTGTTGGCATTTCTCTGTC   | ACAAGTCAAGTCACTGTGCACAT  | 172                           | 128                               | 0.95                                  | 1503                    |                        |                             |                           |
| A164      | EK3X9LI02FL5QN            | AACTCGGCATTTATCCGTTG    | TCCGCTACATGAATTAAGCAA    | 189                           | 148                               | 0.90                                  | 0                       |                        |                             |                           |
| A165      | EK3X9LI02GFCPO            | CATAATCCCCAGATATGCAG    | TGCCCTGAAGTTACAAATGATG   | 163                           | 120                               | 0.98                                  | 1                       | yes                    | 32                          | 18,723,414                |
| A166      | EK3X9LI02JUKUM            | ATGGCTGTTTGGAAATGG      | AGCAGGCTACTGGGGTACTG     | 160                           | 120                               | 0.97                                  | 3                       |                        |                             |                           |
| A167      | EK3X9LI02I4GH3            | GCCAGAGAAATCTAGCAA      | AATTGGCAACAGCCTCACTT     | 146                           | 106                               | 0.94                                  | 1                       |                        |                             |                           |
| A168      | EK3X9LI02GZ29S            | GGACTGATCCCTCTGACAA     | CCTTTGAATTTGGTGTGG       | 164                           | 124                               | 0.97                                  | 0                       |                        |                             |                           |
| A169      | EK3X9LI01CFY6E            | CAAGTCTTGAACCTCTCCC     | CCTTCTGGTGAACCTCTGACA    | 162                           | 121                               | 0.92                                  | 3                       |                        |                             |                           |
| A170      | EK3X9LI02I8SJM            | GGTTGAGAGGAGGTTGGGAT    | AATACGTTAGGGGGCGGAC      | 187                           | 149                               | 0.97                                  | 3                       |                        |                             |                           |
| A171      | EK3X9LI01CDP0M            | CCTGTACGTGGCAAGAGGT     | AAGTCACTGAAGCCCGTGT      | 177                           | 137                               | 0.94                                  | 1734                    |                        |                             |                           |
| A172      | EK3X9LI01B941C            | TAAAGTCCCGTCCAGAGAA     | GACACCGTTCGGGTCTATTC     | 164                           | 124                               | 0.95                                  | 557                     |                        |                             |                           |



| target ID | read ID GenBank | F-Primer 5'-3'            | R-Primer 5'-3'            | product length in bp amplicon | product length in bp w/out primer | Mastodon-loxAfr1 alignment % identity | # of hits isPCR loxAfr1 | consensus for all taxa | aligned loxAfr3 scaffold ID | loxAfr3 scaffold position |
|-----------|-----------------|---------------------------|---------------------------|-------------------------------|-----------------------------------|---------------------------------------|-------------------------|------------------------|-----------------------------|---------------------------|
| A173      | EK3X9LI01COG9U  | GGACAAGTAGTCCAATGTTGCC    | TCGGGAATATGCTCTCAACA      | 157                           | 115                               | 0.97                                  | 1                       | yes                    | 7                           | 41,888,057                |
| A174      | EK3X9LI02FPNPZ  | CACAAGGTAATTATGAGCCCAA    | ACTGCTGCTGCTCCTTCA        | 156                           | 114                               | 0.98                                  | 185                     |                        |                             |                           |
| A175      | EK3X9LI02HKA5F  | CCGAGCAGTACCTCAGAAGA      | GTCAACAGGCCTTCTTCC        | 181                           | 142                               | 0.94                                  | 130                     |                        |                             |                           |
| A176      | EK3X9LI02JYAKH  | CGGGGCTCTGCTATTTCAG       | GTCCCGCAGACCAGATAG        | 164                           | 127                               | 0.96                                  | 22                      |                        |                             |                           |
| A177      | EK3X9LI01DNN7S  | TCCCCATCCTTTCTCTTGA       | TGACCAACCAACAAACAGG       | 186                           | 146                               | 0.96                                  | 2                       |                        |                             |                           |
| A178      | EK3X9LI01A38EU  | CAATTGTGGAAACATCAAAACTG   | CCATTGGCTAGTCCCAACAT      | 160                           | 117                               | 0.96                                  | 3                       | yes                    |                             |                           |
| A179      | EK3X9LI01DLN0U  | GGCTATGGTGTCATCCACC       | GCCGAACGAAGGAGAAAATC      | 184                           | 144                               | 0.97                                  | 1                       | yes                    | 20                          | 38,002,468                |
| A180      | EK3X9LI02GECMC  | TGACAGATAAAGGGCAAGTGG     | TGCCTCCCTCTTGATTATGG      | 151                           | 110                               | 0.95                                  | 3                       | yes                    | 53                          | 5,839,203                 |
| A181      | EK3X9LI02JOYBY  | TAGGATCTCCCTTTGGGTTG      | TGTGCAGGGTGTATGTGCT       | 185                           | 145                               | 0.92                                  | 1                       |                        |                             |                           |
| A182      | EK3X9LI01BKX6S  | AGGACTGGAGCTCGGTAACA      | CAAGGTGATGGAGTACCCTGA     | 170                           | 129                               | 1.00                                  | 0                       | yes                    |                             |                           |
| A183      | EK3X9LI02JX96K  | GCTGGTGAGGAGTGAGCTTC      | TCTCCCTAATGTGACAGCC       | 161                           | 121                               | 0.96                                  | 95                      |                        |                             |                           |
| A184      | EK3X9LI02IDCDD  | GCTTAAATGAGCCATCCCA       | CAGTCTCGTGTCTCCTGGT       | 165                           | 125                               | 0.90                                  | 11                      |                        |                             |                           |
| A185      | EK3X9LI01D32G7  | AGGTGAGAAAGCCCGAG         | ATTCTTGGCCGGGAATCTC       | 165                           | 127                               | 0.96                                  | 6                       |                        |                             |                           |
| A186      | EK3X9LI01BIKBU  | CCCCAGGCAATTAAGCTTCT      | AGTCTGCATCATAGCCAGGG      | 187                           | 147                               | 0.95                                  | 0                       | yes                    | 83                          | 4,825,814                 |
| A187      | EK3X9LI02FRKY4  | GATGTCTCAGGATTTGAGGGA     | CACCCTGTGCATTATTGGT       | 180                           | 140                               | 0.98                                  | 1                       |                        |                             |                           |
| A188      | EK3X9LI01DOV2U  | ATTTCTGGCAGTTCCTGTG       | GGAAGAAGTCCAAGCCACAC      | 184                           | 144                               | 0.94                                  | 152                     |                        |                             |                           |
| A189      | EK3X9LI02JN1NO  | AGCCCTGGAGCAGTGTTTA       | ATCTCCAGACAGGAGTTGCC      | 140                           | 100                               | 0.97                                  | 2                       |                        |                             |                           |
| A190      | EK3X9LI01A00Z0  | GACCCAAGTGACCCCTCTCT      | CATGGAGCTGCAGTGAGTTG      | 151                           | 111                               | 0.96                                  | 1                       | yes                    | 22                          | 39,379,180                |
| A191      | EK3X9LI02ILR5V  | AACTGACTGACAGGGTGC        | GGGATGGTCCCATAGATCAC      | 173                           | 134                               | 0.96                                  | 0                       | yes                    | 14                          | 6,513,068                 |
| A192      | EK3X9LI01BZ6AP  | TATCCCCAATGGTTTGTGCT      | TGTTGTTGTTAGTTGCCACAGA    | 175                           | 133                               | 0.98                                  | 7                       |                        |                             |                           |
| A193      | EK3X9LI01BF8WX  | CCTGCTGTACGAGGCAAGAC      | TCAAGATTTTGCCCTCTGCT      | 157                           | 117                               | 0.97                                  | 639                     |                        |                             |                           |
| A194      | EK3X9LI02HHLCV  | GGGCCTAAGGCTTCTTCTC       | GATTTTGTGGCCAAGGACAG      | 186                           | 146                               | 0.96                                  | 1165                    |                        |                             |                           |
| A195      | EK3X9LI01D9AK9  | ACTTGTGTCCGGGGATAGC       | AGGCCGAAGGAGTAGGTGTT      | 174                           | 135                               | 0.91                                  | 1                       | yes                    | 3                           | 20,250,612                |
| A196      | EK3X9LI02I4J7D  | CCCCCTATGGGATACCTTGA      | GCAAAAGCTCAGACTCTTTGTAA   | 139                           | 96                                | 0.95                                  | 1                       | yes                    |                             |                           |
| A197      | EK3X9LI01ES0QL  | TCCTGATGCTGCATTCTTCT      | CATTCAAACAGAACACGGG       | 157                           | 116                               | 0.92                                  | 82                      |                        |                             |                           |
| A198      | EK3X9LI02GB3Q1  | TGCTGCGGTTTTTCTTCTT       | TGTAGGGATGAAAGCCCAAG      | 179                           | 139                               | 0.96                                  | 130                     |                        |                             |                           |
| A199      | EK3X9LI02I3BZM  | CACAGCTGAGGGAAGAGAGG      | CACATGGCCTAACCAAGTTAAT    | 181                           | 139                               | 0.98                                  | 3                       | yes                    | 9                           | 82,155,052                |
| A200      | EK3X9LI02I9BMY  | CTCAGCCCAGGAACACATTA      | CTCTCAGCCCTCATGGCA        | 177                           | 139                               | 0.97                                  | 1                       | yes                    | 28                          | 6,496,546                 |
| A201      | EK3X9LI02J0BXR  | TGAAAGAGGTAGAGGCAGGC      | TAAAACCACGGACCTTTTGG      | 153                           | 113                               | 0.98                                  | 0                       | yes                    | 23                          | 11,204,208                |
| A202      | EK3X9LI02GX158  | GAAAGCAAAGAAGTCAACCTGA    | TCTCCAACACCACAATTCAAA     | 144                           | 101                               | 0.88                                  | 1                       |                        |                             |                           |
| A203      | EK3X9LI02HICTO  | CGGGGTTAGTTCAGGAGG        | AACAAGTGAATCGATCACATACAT  | 179                           | 137                               | 1.00                                  | 1288                    |                        |                             |                           |
| A204      | EK3X9LI01B6NX6  | TGAACATGTAATCAAGATGCATTG  | GCCGTTTACGTTGGTGA AAA     | 187                           | 143                               | 0.87                                  | 36                      |                        |                             |                           |
| A205      | EK3X9LI01DH4GJ  | GGTGATACTCTTGCTAAATAAGTGG | TGCTGTAATAAAAACCATTTCTCTC | 162                           | 112                               | 0.96                                  | 5                       | yes                    | 3                           | 24,751,797                |
| A206      | EK3X9LI01EYOLN  | CGAGGAGACTGCCATTTT        | GTCCCAACGTCATAAAACC       | 148                           | 109                               | 0.94                                  | 1346                    |                        |                             |                           |
| A207      | EK3X9LI01AG3Z2  | TGCCATACACTCCTGATTGC      | TCTTGGATCAGGTGGACACA      | 164                           | 124                               | 0.97                                  | 6                       |                        |                             |                           |
| A208      | EK3X9LI01CGJW5  | CACCCTGCAAGAGAGGAGAG      | GTGTTTGGACTCCCAGGATG      | 197                           | 157                               | 0.92                                  | 0                       | yes                    | 8                           | 60,121,961                |
| A209      | EK3X9LI02J346Q  | AAAGGCTTCTTGGGGTAGGA      | TGACAGCATGTTTTCAAGTTTCT   | 180                           | 137                               | 0.97                                  | 6                       |                        |                             |                           |
| A210      | EK3X9LI02F0NW3  | ATAGGCCCGAGTAGAGGAGC      | AATTCTGGCCTGTGGGACT       | 161                           | 122                               | 0.90                                  | 955                     |                        |                             |                           |
| A211      | EK3X9LI02HV00D  | CTATCGTGAAGGCTCGCTT       | GAGTCTCCCTTTCACCGAG       | 171                           | 132                               | 0.93                                  | 89                      |                        |                             |                           |
| A212      | EK3X9LI02HAW50  | AAGTAATGGCATGCGGAATC      | AGAAGCCCTATCCTTCCAA       | 171                           | 131                               | 0.97                                  | 2                       | yes                    | 43                          | 4,093,612                 |
| A213      | EK3X9LI02GE17J  | AGGCAAGAGATGCTGAGTGG      | CACACCCTGGGAAAGGCTAC      | 144                           | 104                               | 0.97                                  | 2182                    |                        |                             |                           |

A2

**Target and primer information for experimental round A.2:** read ID corresponds to the read in the short read archive SRA010805, beside primer sequences PCR product length with and without primers is given, as well as the percent identity of the respective mastodon-loxAfr1 alignment, "# of hits isPCR" gives a number how often the respective primer pair anneals to loxAfr1, and a "yes" in the row "consensus for all taxa" means, that sequence information is available for all taxa. The last two rows show scaffold ID and position of the targets used in the MCMCcoal analysis aligned to loxAfr3.

| target ID | read ID GenBank SRA010805 | F-Primer 5'-3'            | R-Primer 5'-3'           | product length in bp amplicon | product length in bp w/out primer | Mastodon-loxAfr1 alignment % identity | # of hits isPCR loxAfr1 | consensus for all taxa | aligned loxAfr3 scaffold ID | loxAfr3 scaffold position |
|-----------|---------------------------|---------------------------|--------------------------|-------------------------------|-----------------------------------|---------------------------------------|-------------------------|------------------------|-----------------------------|---------------------------|
| A214      | EK3X9LI01A6YMK            | GAAGCCAGGTTCTCAGCAT       | TCCATTAACCCCAACAGA       | 161                           | 121                               | 0.97                                  | 2                       | yes                    | 97                          | 479,593                   |
| A215      | EK3X9LI01DAICP            | CCGGCTTAACCCAGTAGTTG      | TGTGGCTTTATGCAGATTGG     | 183                           | 143                               | 0.99                                  | 2                       | yes                    | 110                         | 1,274,053                 |
| A216      | EK3X9LI01BAUW5            | GGATGAATAGGGCAATCAA       | TGAGTTGGCCCTCATCAAAA     | 177                           | 137                               | 0.92                                  | 1                       | yes                    | 13                          | 16,032,688                |
| A217      | EK3X9LI01C10D3            | CAGGACTCGCTTCTCCACT       | CACACACACACTGCT          | 176                           | 137                               | 0.99                                  | 1                       | yes                    | 92                          | 2,467,920                 |
| A218      | EK3X9LI02J0Z1A            | GAGGTCTCACCCTCTCA         | GGCAGTCACTCACAGTCCT      | 182                           | 142                               | 0.92                                  | 2                       |                        |                             |                           |
| A219      | EK3X9LI01CI39V            | CAGCTTCCAGCCAGGTCTA       | ATGGGAGTTGAACCAAGCT      | 148                           | 108                               | 0.99                                  | 2                       | yes                    | 84                          | 5,711,232                 |
| A220      | EK3X9LI01EW96T            | ACAGTCGCTTACCTCCTG        | TAGGCAGGGAATCTTGAGGA     | 197                           | 157                               | 0.89                                  | 1                       | yes                    | 53                          | 8,525,170                 |
| A221      | EK3X9LI01AZE43            | CCTCCCTCTCTAAAATCTCC      | CAGGAAGACAGAAAGAAAGAA    | 151                           | 108                               | 0.98                                  | 2                       |                        |                             |                           |
| A222      | EK3X9LI02JH9W9            | TCCCTCTAGCCAGATGCTGA      | AAAGCCTACAGCCCACTCA      | 168                           | 128                               | 0.96                                  | 0                       | yes                    | 0                           | 59,325,869                |
| A223      | EK3X9LI02FUTMC            | ACTTGGTGTCTGTGGGAAA       | TGGCCGACACAATCTCTCT      | 154                           | 113                               | 0.97                                  | 1                       | yes                    | 7                           | 81,324,383                |
| A224      | EK3X9LI01DAMAT            | CCAGTTTCCAGTTTGGTGA       | CTCCATGACAGTCAAAAAGTGC   | 175                           | 131                               | 0.90                                  | 2                       | yes                    | 30                          | 24,735,311                |
| A225      | EK3X9LI02GKBWR            | AGGGCGCCGCAAGGACT         | CTGCCCTGCCCTACCC         | 148                           | 112                               | 0.95                                  | 1                       | yes                    |                             |                           |
| A226      | EK3X9LI01BJT69            | TGGAAGGTGTGATGACTGA       | GAGAGCACCAACCAAGATT      | 160                           | 120                               | 0.99                                  | 2                       |                        |                             |                           |
| A227      | EK3X9LI01DR5D4            | AGGAAGGCGCTGGAAGAATA      | GCTGAGTCTGTGCCTTCCTT     | 170                           | 130                               | 0.99                                  | 1                       | yes                    |                             |                           |
| A228      | EK3X9LI01CSRAY            | CTTTTGGCATCTCCGAAGTA      | CCAATCCCTCATCTGGTGT      | 189                           | 149                               | 0.88                                  | 1                       |                        |                             |                           |
| A229      | EK3X9LI02GJUXQ            | GCAAGACAGTAATAACAGGCA     | GAATTTGGACTTGGGAGACAGA   | 196                           | 152                               | 0.98                                  | 1                       | yes                    | 15                          | 50,273,886                |
| A230      | EK3X9LI02F7W3P            | GACCCCTCCAGGATCTAACG      | GCCAGGAAAATGCCAAATTA     | 187                           | 147                               | 0.96                                  | 0                       |                        |                             |                           |
| A231      | EK3X9LI02FMHVI            | CAGGATCAGGATCAACTTGGGA    | TAGTACTTGGCCCAAGCAGG     | 162                           | 121                               | 0.98                                  | 1                       |                        |                             |                           |
| A232      | EK3X9LI02J8V9             | GTGTCGCATCTCCCTTAC        | CCAATTCACITTTGAGCCT      | 171                           | 131                               | 0.97                                  | 1                       | yes                    | 12                          | 31,489,001                |
| A233      | EK3X9LI01C2U0             | GCCTTAGAACCTTTATGACACAAGA | TCCTTCTCACTCGCAGGAT      | 172                           | 127                               | 0.96                                  | 1                       | yes                    | 18                          | 26,323,125                |
| A234      | EK3X9LI01BQPYQ            | TCTTATCTCTCTCCGCCC        | CAGTTTGGAGTTTGTGGGG      | 166                           | 126                               | 0.98                                  | 1                       | yes                    | 28                          | 12,171,137                |
| A235      | EK3X9LI01EUZ9D            | ACGGGCATGTGTAGGATTT       | GTGGCCTCTAGCTCCACTCA     | 173                           | 133                               | 0.94                                  | 1                       | yes                    | 25                          | 12,455,405                |
| A236      | EK3X9LI01AHPM0            | GGACTGGGTGGTGTTCATTC      | GAACTGTCAAGGATTTGACCT    | 163                           | 122                               | 0.95                                  | 1                       | yes                    | 57                          | 4,986,525                 |
| A237      | EK3X9LI02H570X            | TGGCAAACCATGAGAATCA       | TCAGGTGGATGTCCTGAGT      | 166                           | 126                               | 0.95                                  | 2                       | yes                    | 12                          | 52,770,539                |
| A238      | EK3X9LI02ICHTZ            | CAGTGGATTTGACCCCTAT       | TTTCTAATAATCACTCCACTGCC  | 151                           | 107                               | 0.98                                  | 1                       | yes                    | 137                         | 501,356                   |
| A239      | EK3X9LI01AZKE2            | CAACAACAACAGCACCAACC      | GGTAGCCTGACCTCACACT      | 171                           | 131                               | 0.95                                  | 2                       | yes                    | 12                          | 34,447,175                |
| A240      | EK3X9LI01BNVRE            | CAGATTGGCCAAATGCAAG       | TGGATTGCACCTCAACCTAA     | 168                           | 129                               | 0.94                                  | 1                       |                        |                             |                           |
| A241      | EK3X9LI01CS96W            | TGGAATAAGTGAGCAAGAGCA     | GCACCTGAGTAGAAGATGCAA    | 158                           | 116                               | 0.96                                  | 2                       | yes                    | 5                           | 2,099,580                 |
| A242      | EK3X9LI01DBT28            | GTCTATGGTCTCGGGAAATA      | GGACTGTCCATCCCCAC        | 168                           | 130                               | 0.90                                  | 1                       |                        |                             |                           |
| A243      | EK3X9LI02GXGIC            | TGGTCCACATCTGCCTTCT       | GCCTGACTAATGATCAAAATGTT  | 184                           | 139                               | 0.99                                  | 2                       | yes                    | 2                           | 96,260,218                |
| A244      | EK3X9LI01C5BXG            | GAGATGATCAGCCAGGTTTC      | AAGGTGAAAATTCATTAATCCAGA | 171                           | 126                               | 0.98                                  | 1                       | yes                    | 31                          | 3,190,302                 |
| A245      | EK3X9LI02HHH91            | CCCTCTGTGATGTCAGTGT       | TGTCAGTTCGTCTGGGAAC      | 201                           | 161                               | 0.93                                  | 1                       | yes                    | 55                          | 10,557,275                |
| A246      | EK3X9LI01CUAQF            | ACCATTTCCTGTTCCGCTCA      | CCCTGAGGTGCAAAAAGT       | 200                           | 160                               | 0.96                                  | 2                       | yes                    | 101                         | 4,362,706                 |
| A247      | EK3X9LI02HHXNO            | AGGCATCCAGAACTGCTCT       | AGTGAAGCCTGTGCTGGG       | 142                           | 105                               | 0.98                                  | 2                       | yes                    | 12                          | 20,904,563                |
| A248      | EK3X9LI01C88FU            | ACCAACCCATTGCCATCTA       | AGTGGTTAAGAGCTCGGCTG     | 151                           | 111                               | 0.96                                  | 0                       |                        |                             |                           |
| A249      | EK3X9LI01C41XA            | TAGCAGCTTTTGGTTTGCCT      | ACAAGCACACTGAGAGATGTGT   | 182                           | 140                               | 0.97                                  | 2                       | yes                    | 97                          | 2,757,461                 |
| A250      | EK3X9LI02H0GIE            | CCTTCAGAAGCCCTATGAAA      | ATCTTATCCGATGGGGGAG      | 123                           | 93                                | 0.97                                  | 1                       |                        |                             |                           |
| A251      | EK3X9LI01EVMCB            | GTCCGTTCTGACTCATGGTG      | AGTCCCTAGATTGCTGGGT      | 197                           | 157                               | 0.99                                  | 1                       | yes                    |                             |                           |
| A252      | EK3X9LI02IU90W            | AACAACCCAGGGTAGCCACAA     | TTCTCCTCTTAGGGGGACT      | 159                           | 119                               | 0.94                                  | 1                       | yes                    | 19                          | 9,704,021                 |
| A253      | EK3X9LI01DMCVW            | AGACCACAGCTTCAAGTATGG     | TTTCTTACTGCTGCTTCCA      | 167                           | 126                               | 0.99                                  | 0                       |                        |                             |                           |
| A254      | EK3X9LI01DE35N            | GGACTTACAGCAGTAAATCAGGA   | ACGTTTGGGACTGCAGCATA     | 167                           | 123                               | 0.94                                  | 1                       | yes                    | 68                          | 3,515,241                 |
| A255      | EK3X9LI01E3ANB            | ACTTGGGAGCCCTGTTTAG       | CTGGCCAGAAAGGAGGACTA     | 168                           | 128                               | 0.98                                  | 1                       | yes                    | 0                           | 90,319,470                |
| A256      | EK3X9LI02HCP5E            | AGGGAACCTGCCAGAAATCCA     | GATCTGCAGAGTCAAATGCC     | 150                           | 110                               | 0.94                                  | 0                       |                        |                             |                           |
| A257      | EK3X9LI02IX36P            | TATAGCTTGGGGGCTTTTTC      | TGCAGAGGAGAAACAGTTTG     | 177                           | 136                               | 0.98                                  | 1                       | yes                    | 6                           | 19,705,800                |
| A258      | EK3X9LI01B5YLH            | TAAGTCAGGCTCCTTTTGG       | CTGATTTCAAAGCCCAAGCA     | 178                           | 139                               | 0.96                                  | 1                       | yes                    | 18                          | 25,385,818                |
| A259      | EK3X9LI01BYU3U            | AACCACTATGCCACCAGGTT      | CTGGGAGTCTAACCCACCAC     | 189                           | 149                               | 0.95                                  | 0                       | yes                    | 8                           | 62,591,951                |
| A260      | EK3X9LI01B2CXX            | GTATGATGTCTTCCGCGAGG      | TTTGAATTGTGTTTGGGG       | 180                           | 140                               | 0.92                                  | 2                       |                        |                             |                           |
| A261      | EK3X9LI01C04JU            | CTCGAGGGCTCGGCTCGG        | GTGTGCTCCGAGGATGCTG      | 188                           | 151                               | 0.96                                  | 0                       |                        |                             |                           |
| A262      | EK3X9LI01D78CW            | GCTAATCGCAAAATACGTAAGCA   | CAAATAATGATATCACTGCC     | 182                           | 142                               | 0.97                                  | 1                       | yes                    | 4                           | 100,302,354               |
| A263      | EK3X9LI01A36MQ            | TGGATACCAGAGGTGTCTTCAA    | TGAGGCAGAAAAACATCCC      | 190                           | 148                               | 0.89                                  | 2                       |                        |                             |                           |
| A264      | EK3X9LI01C31CQ            | TGTGGTAGCATGGCTTTATGG     | CATTGAGAACTGAAAGACTGGT   | 172                           | 127                               | 0.98                                  | 1                       | yes                    |                             |                           |
| A265      | EK3X9LI01AXUGS            | GGTTGAACCTGAATGAGCGT      | GCACGCTCCTGGAGTTCTC      | 166                           | 127                               | 0.97                                  | 1                       | yes                    |                             |                           |
| A266      | EK3X9LI02IP80Q            | GCCTCATGGGAAGTAAAAC       | ATGGATCAAAGGTGACGACC     | 155                           | 115                               | 0.96                                  | 1                       | yes                    | 16                          | 15,855,345                |
| A267      | EK3X9LI01DW9XM            | AAGCAATGTCTTACTACTGGTGA   | TGCAACAAGCAACAACATGA     | 138                           | 94                                | 0.96                                  | 0                       | yes                    | 14                          | 50,048,147                |
| A268      | EK3X9LI01BA2KU            | CTTTTCTCTGAGCCTAGCCC      | TCCACCATCACTTCAAATGG     | 137                           | 97                                | 0.97                                  | 2                       | yes                    | 11                          | 27,188,476                |
| A269      | EK3X9LI01EQMZH            | ATGAGCTGAGCTGGAAGCAT      | GGAAGACTTCGTTTCTTG       | 136                           | 96                                | 0.99                                  | 1                       | yes                    |                             |                           |
| A270      | EK3X9LI02GJE0M            | TTTCTGCGGCTTCTCCTAGT      | TGCAGGTTGACATTTAACGA     | 154                           | 114                               | 0.98                                  | 0                       | yes                    |                             |                           |
| A271      | EK3X9LI01AG73T            | TCTCAGTGTAGGGACCTATGG     | CCTTCCAACGGGATCATTTTA    | 156                           | 116                               | 0.91                                  | 1                       | yes                    | 4                           | 89,117,088                |
| A272      | EK3X9LI01DSCFL            | TCCGGTACAGGCTTCTCTGG      | TGTGTGTCTCAGATGACTGGGTG  | 177                           | 114                               | 0.98                                  | 1                       | yes                    | 11                          | 9,150,261                 |
| A273      | EK3X9LI01E0MTG            | AAGTGGCAGCATCGAGAGAC      | CTCTGCCACAAAGTGCCT       | 184                           | 146                               | 0.95                                  | 0                       | yes                    | 45                          | 4,466,640                 |
| A274      | EK3X9LI02HISXL            | CTTCCCTCAGAGGAATAACCA     | CTTCTGTGAGCAACTGCCT      | 203                           | 162                               | 0.95                                  | 1                       |                        |                             |                           |
| A275      | EK3X9LI01EMD03            | AGTAGACAGTGTGTGGGGC       | CTCTCGTGGTGAAGGCAC       | 174                           | 136                               | 0.96                                  | 1                       |                        |                             |                           |
| A276      | EK3X9LI01C61ZJ            | GCACCCTGGGGAAGGTATAG      | CTGCCTGAGATTTACTGCGA     | 171                           | 131                               | 0.98                                  | 0                       |                        |                             |                           |
| A277      | EK3X9LI02F2KAX            | AGGTGCTGCTCATCTGAGC       | GACAGCGGCAGACAGAT        | 170                           | 134                               | 0.93                                  | 0                       | yes                    | 5                           | 79,715,844                |
| A278      | EK3X9LI02GYCYN            | TTTGTGATCCTGCAAGGTCG      | TTTTTCTGTATGCATATATGCTGT | 156                           | 111                               | 0.94                                  | 1                       | yes                    | 23                          | 18,612,615                |
| A279      | EK3X9LI01BL8TH            | CTCCAATCAACAGTGAACCCC     | CCACCGGAGGCAGATAGG       | 142                           | 104                               | 0.96                                  | 0                       | yes                    | 8                           | 78,972,721                |
| A280      | EK3X9LI02IM216            | TACTGATTGGAAAAGGGGGG      | ATGGCGGAGCCAAATACAG      | 159                           | 119                               | 0.92                                  | 0                       | yes                    |                             |                           |
| A281      | EK3X9LI02JRGTA            | AGGAAGAAAGGCTGGTGTAT      | GCTGCTGCATGCTCACTCT      | 164                           | 124                               | 0.98                                  | 0                       |                        |                             |                           |
| A282      | EK3X9LI02IDB6R            | GGCTGAGGTCCTCTTGTGT       | TTTTTCTCTTATCCCTTGGGA    | 170                           | 128                               | 0.96                                  | 1                       | yes                    | 18                          | 34,832,978                |
| A283      | EK3X9LI02GUA05            | ACGCTTGGAGCAGACAGTGT      | TGCACACTTGAAGCATCTCT     | 159                           | 119                               | 0.98                                  | 0                       | yes                    | 90                          | 5,612,392                 |
| A284      | EK3X9LI01E0S03            | TCAAAGACACAGCCCTTCA       | GCCTTCTCGGTTTCTTTCAG     | 181                           | 141                               | 0.89                                  | 0                       |                        |                             |                           |
| A285      | EK3X9LI02HCAW0            | AAATGACAGAAAATTTGGCCT     | TAAACCTTCTCTGTGGGG       | 152                           | 111                               | 0.99                                  | 1                       | yes                    | 27                          | 33,846,061                |
| A286      | EK3X9LI01APTFF1           | TCTTCTCACAGTCCCTTTT       | GCAGCATCTTGGAGTGACA      | 175                           | 135                               | 0.87                                  | 1                       | yes                    | 14                          | 51,320,467                |
| A287      | EK3X9LI01DKQC1            | CAGTCTCCCTGTGCTCTGG       | GCTGTAGAGTGTGGGCACA      | 190                           | 150                               | 0.97                                  | 0                       |                        |                             |                           |
| A288      | EK3X9LI02I5B92            | GTGGAGCGCCTTCTCTGA        | ACGGATGAGTATGTGGTGGT     | 186                           | 148                               | 0.99                                  | 1                       |                        |                             |                           |
| A289      | EK3X9LI02H7DWQ            | CCAGGATGACTTTAAGGGATTTT   | TGTAAGTGTGTAAGTGGGAG     | 182                           | 138                               | 0.99                                  | 1                       | yes                    | 2                           | 91,796,234                |
| A290      | EK3X9LI01EL68Y            | GGGTACAGGCTTACCGATG       | GTAGGCCCTCCAGCACC        | 179                           | 140                               | 0.92                                  | 0                       |                        |                             |                           |
| A291      | EK3X9LI02FGJW8            | CAGGAATCCAGCAGCTAAA       | GGTGTGAGCAACCACTGAGA     | 185                           | 145                               | 0.96                                  | 1                       | yes                    | 26                          | 25,202,384                |
| A292      | EK3X9LI01CEPH4            | TGGCCACAGGATGACTCAG       | GACGAGCATCTGACACCAC      | 186                           | 147                               | 0.96                                  | 1                       |                        |                             |                           |
| A293      | EK3X9LI01ESOP1            | CACCTCTGGCTCCTGTG         | CCCTTGGCCACCACTAAA       | 176                           | 138                               | 0.99                                  | 1                       |                        |                             |                           |
| A294      | EK3X9LI01EFXA0            | CCTGGCTCTGAGTAGAGGATTT    | CCTGACCTTCAAAAATCACCA    | 200                           | 157                               | 0.98                                  | 0                       | yes                    | 31                          | 2,675,757                 |
| A295      | EK3X9LI02I1W1WN           | GACTTGTCTGGCATTTCCCT      | AGGGTGCACCTTCAAGGAT      | 196                           | 158                               | 0.94                                  | 1                       |                        |                             |                           |
| A296      | EK3X9LI02HERS2            | TATCTTCTGCGCTTCTCT        | TGGTATGACCCCACTCTG       | 175                           | 135                               | 0.97                                  | 1                       |                        |                             |                           |
| A297      | EK3X9LI01D261C            | TGGTTTGAACAAGCATTAA       | ACCAATGTGGGAAGGATGGT     | 150                           | 110                               | 0.87                                  | 1                       |                        |                             |                           |
| A298      | EK3X9LI01EKU3Q            | GTGGGAAACAGTATGGTGG       | ACCAGCCATAAGTCTGCTC      | 174                           | 136                               | 1.00                                  | 0                       |                        |                             |                           |
| A299      | EK3X9LI01EGAXM            | ACCCTCTCACCAACCT          | ACACTGGCTGAAAGACCCAG     | 165                           | 127                               | 0.95                                  | 1                       | yes                    | 8                           | 44,369,514                |
| A300      | EK3X9LI02IFNCG            | CCTCTCCGTGATGAGCCTAC      | CCCCATGTTGATGAGCGAAA     | 157                           | 116                               | 0.96                                  | 0                       | yes                    | 48                          | 1,875,618                 |
| A301      | EK3X9LI01DWCAZ            | GATCTACTTGGTTATAAGCCTGC   | CCACACAATGATGCTTGA       | 165                           | 120                               | 0.96                                  | 1                       | yes                    |                             |                           |
| A302      | EK3X9LI02G0MB9            | TCTGGCCTTAGTGCTTTGT       | AAAGGGTCGCCAGTTCAAAT     | 165                           | 125                               | 0.95                                  | 0                       | yes                    | 96                          | 1,758,331                 |

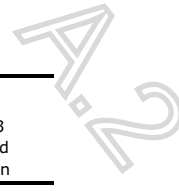

| target | read ID GenBank | F-Primer 5'-3'          | R-Primer 5'-3'           | product length in bp amplicon | product length in bp w/out primer | Mastodon-loxAfr1 alignment % identity | # of hits isPCR loxAfr1 | consensus for all taxa | aligned loxAfr3 scaffold ID | loxAfr3 scaffold position |
|--------|-----------------|-------------------------|--------------------------|-------------------------------|-----------------------------------|---------------------------------------|-------------------------|------------------------|-----------------------------|---------------------------|
| A303   | EK3X9L102GXPG5  | GGTGCACCTTAGTCTTCAAGG   | GCAACATCATGATAAATGGAGAA  | 189                           | 145                               | 0.92                                  | 0                       |                        |                             |                           |
| A304   | EK3X9L101AP2KK  | ACACGTCTTCGAGTGCAGAG    | AAATATAACCCCAAGCAGGCC    | 178                           | 138                               | 0.93                                  | 1                       | yes                    | 2                           | 67,326,190                |
| A305   | EK3X9L102F2W14  | ACCTTCCAGGACTGGTATGGAT  | CGGGCCAGACTAGGTAAGGT     | 155                           | 115                               | 0.95                                  | 1                       | yes                    | 31                          | 11,774,220                |
| A306   | EK3X9L101B6D8U  | TGGAAATCCAGTGGAAAGGAG   | TGAGTTTGCCAGTAGTGCCTT    | 166                           | 126                               | 0.95                                  | 1                       | yes                    | 55                          | 11,051,588                |
| A307   | EK3X9L102JVNVO  | TCCCTGGCTTCCAGCAT       | CTGGTAATCCGTCATGTT       | 174                           | 134                               | 0.98                                  | 1                       |                        |                             |                           |
| A308   | EK3X9L102H2Y5V  | TGTCCTGACCTTCTCCAGT     | TATATTTACCGCACCCCGG      | 177                           | 137                               | 0.94                                  | 0                       |                        |                             |                           |
| A309   | EK3X9L101BV7SL  | TTCACCACTATAGCAACCA     | CTGTGATGTTCTGGAGCC       | 185                           | 145                               | 0.92                                  | 0                       | yes                    | 17                          | 30,851,947                |
| A310   | EK3X9L102HEM7N  | GTCCTCTCCACCCCTGCTG     | AGGCCAGGGTACAACCTTA      | 188                           | 148                               | 0.91                                  | 1                       |                        |                             |                           |
| A311   | EK3X9L102SHAS   | CCTTTGAAGGGTGGCTAATG    | AGAAAAATGTGAGCGCAGGAG    | 156                           | 116                               | 0.98                                  | 0                       | yes                    |                             |                           |
| A312   | EK3X9L101BATY4  | GTCATGGGCAGAGAGGTAC     | CTGCCGTGCTCTCCACT        | 164                           | 126                               | 0.99                                  | 1                       | yes                    | 5                           | 11,867,225                |
| A313   | EK3X9L101D26AB  | AAAGCCCAATAGATTAGCATTG  | ACCACCAGACTAGAGCCC       | 147                           | 104                               | 0.98                                  | 1                       | yes                    | 13                          | 9,741,987                 |
| A314   | EK3X9L101C5E1W  | GGGTACCCTCTATGGCCCT     | GGAGGTGGGACTCAGAGGA      | 152                           | 113                               | 0.98                                  | 0                       | yes                    | 19                          | 37,637,919                |
| A315   | EK3X9L102I7G1A  | ATCTCTGAGCTCCAGGGG      | AACATCAGTTCCAGGCACAA     | 185                           | 145                               | 0.96                                  | 0                       | yes                    | 3                           | 2,970,325                 |
| A316   | EK3X9L101B101E  | AAGCAGAAAAGGTGTCAGGG    | TCCAAGTTCTCACTACTTTCAGCA | 175                           | 131                               | 0.98                                  | 0                       |                        |                             |                           |
| A317   | EK3X9L102H6HJK  | CATGAAGTGGAGGCTGAAC     | CAGCTCGTTTCTGCTCTCC      | 168                           | 128                               | 0.96                                  | 1                       | yes                    | 123                         | 1,762,385                 |
| A318   | EK3X9L102JWOZV  | AAACCCCTGGTGTGTAGTGG    | TCTAAAACTCAACTTAGTGCCG   | 164                           | 121                               | 0.96                                  | 0                       |                        |                             |                           |
| A319   | EK3X9L102GZSQ8  | CCCCGTTGGTTATGGTAATG    | CCAGCACCAAGGCTAGT        | 170                           | 131                               | 0.98                                  | 1                       | yes                    |                             |                           |
| A320   | EK3X9L102JNZU2  | TGGAACCAGCTGAACATAGG    | AGGCTCCCTTATTTTCAA       | 144                           | 104                               | 0.98                                  | 1                       | yes                    | 114                         | 1,404,004                 |
| A321   | EK3X9L101BN7F6  | GAGATTACCCCTTCTCCCTG    | GAGCTGGGAGGTGCAGAT       | 164                           | 125                               | 0.95                                  | 1                       | yes                    | 16                          | 34,910,293                |
| A322   | EK3X9L102HJXEE  | TTGGGCATGAAGGCTATTGT    | GCTCTGCTCAATCTCTGAAC     | 168                           | 128                               | 0.96                                  | 1                       |                        |                             |                           |
| A323   | EK3X9L102IHQWE  | AAGAAAGCCTGCACCCCTC     | TCCAGCCAGGAGTAGTAGCC     | 180                           | 140                               | 0.98                                  | 1                       |                        |                             |                           |
| A324   | EK3X9L101C3BAK  | AAATTGAGAAAGCCAAAGCA    | TCACTTGGGACATGTAGCC      | 180                           | 140                               | 0.99                                  | 1                       | yes                    | 13                          | 28,007,158                |
| A325   | EK3X9L101BJ5ZM  | AGGGGCTAACCATGTCTCTC    | GCAGAAGCCAGGTAGGTGG      | 171                           | 132                               | 0.88                                  | 1                       |                        |                             |                           |
| A326   | EK3X9L102I1MLE  | GCATGCTTGTAGTAACCTTTTTC | CCACTGTGCACAAGTCACTT     | 189                           | 145                               | 0.94                                  | 1                       | yes                    | 73                          | 4,835,113                 |
| A327   | EK3X9L101A6DKU  | ATCAAGAGCAGTGTTCGGG     | TCTTCTCCAATCCGTATGC      | 173                           | 133                               | 0.94                                  | 0                       |                        |                             |                           |
| A328   | EK3X9L102I1GYF  | TCTTCGCAAGTAAGGCGAAA    | GCAGATAAGCAGCTGTTTCC     | 167                           | 127                               | 0.95                                  | 0                       | yes                    | 132                         | 1,763,628                 |
| A329   | EK3X9L102HAYZJ  | CTCCTTGCCTGGCTTCCAC     | CTTCTTCCGGCCTCTCC        | 151                           | 114                               | 0.90                                  | 1                       |                        |                             |                           |
| A330   | EK3X9L102H06PN  | ATGTTAGCCCTGATGACCC     | ATTCTGGTTCACTTCCCCC      | 165                           | 125                               | 0.98                                  | 0                       | yes                    | 140                         | 582,722                   |
| A331   | EK3X9L102GJELN  | GCAAAATGAAATGAGCACTTG   | CTCAAACTCAACCCATGTGA     | 180                           | 139                               | 0.99                                  | 1                       | yes                    | 0                           | 64,893,892                |
| A332   | EK3X9L101D79PM  | TGAAGGCTCCAGTATACCA     | AATGACACCTTGGGCCTGTA     | 170                           | 130                               | 0.98                                  | 0                       | yes                    | 6                           | 64,713,931                |
| A333   | EK3X9L101ATT8N  | TTTTTGGAGCTTATGACGGTT   | CTGTTTCTTCCCACTCCCA      | 154                           | 112                               | 0.98                                  | 0                       | yes                    | 102                         | 646,152                   |
| A334   | EK3X9L102JCVGO  | CTGGAGAGAACAGAGCCAC     | GCCTTCTGAACCTTCTCCCTCA   | 191                           | 150                               | 0.95                                  | 1                       | yes                    | 48                          | 17,101,706                |
| A335   | EK3X9L102I1RUJ  | CTTCGCAACACTGCATAAA     | CACCTGCACATCAGACAGGCT    | 150                           | 110                               | 0.98                                  | 1                       | yes                    |                             |                           |
| A336   | EK3X9L102GKDNX  | CGAGCAGTACGAAACAGCCT    | GCCTCGCTCATGACATAAT      | 171                           | 131                               | 0.95                                  | 1                       | yes                    |                             |                           |
| A337   | EK3X9L101D9NMD  | AGAAGTACTGTTGGGCTGC     | TCTCTTCTCCAGCAGTGCC      | 152                           | 112                               | 0.99                                  | 1                       | yes                    |                             |                           |
| A338   | EK3X9L101C3W4S  | AGCCTGTTGACAGCTGGAAT    | TGGATATGTAATAACAGGCAGAAA | 188                           | 143                               | 0.96                                  | 1                       | yes                    | 5                           | 66,366,555                |
| A339   | EK3X9L102FW3PT  | AGCGACACATCTGTTAAGCG    | TGATTCACACCCCAACTCCA     | 161                           | 121                               | 0.97                                  | 1                       | yes                    | 11                          | 10,327,481                |
| A340   | EK3X9L102HFC44  | TGACCCAGGCACTGGTATT     | CCTCTAAGGAGCACTCTGGC     | 189                           | 149                               | 0.93                                  | 0                       |                        |                             |                           |
| A341   | EK3X9L102I1H3N  | TAGCCGTATTCTGGGAGTGG    | CTGTGGCTCTCTATTTGGGA     | 172                           | 132                               | 0.94                                  | 0                       |                        |                             |                           |
| A342   | EK3X9L101D26Z5  | TCTGCTAACCAAAAGCTCGG    | GACCCAGGCTTGTGCTAAT      | 177                           | 137                               | 0.95                                  | 0                       | yes                    | 49                          | 3,448,120                 |
| A343   | EK3X9L101CV1K0  | GGCCCTTAGTACTTCTCTATT   | CACAGTTCAGATCCCTCAG      | 198                           | 156                               | 0.96                                  | 1                       | yes                    | 33                          | 23,320,683                |
| A344   | EK3X9L101BQZYB  | CTTCAATTCATGGCAGCTC     | CTTGCCTATGCATTCCACA      | 171                           | 131                               | 0.99                                  | 1                       | yes                    | 11                          | 21,526,888                |
| A345   | EK3X9L101AHLK0  | AGTCATTTTCACTGCGGCTC    | TTTCTGGCCTTGGAAATTTG     | 172                           | 132                               | 0.94                                  | 1                       |                        |                             |                           |
| A346   | EK3X9L101CGF48  | CCCTGTGGCATAGAGGTTA     | AACCAAAACCAAGCTGTTC      | 160                           | 120                               | 0.94                                  | 0                       |                        |                             |                           |
| A347   | EK3X9L102HHBR7  | GAGGGCTTTTTCATTACACAGG  | TGGTGGTGCAGTGGTTAAGA     | 182                           | 140                               | 0.94                                  | 0                       |                        |                             |                           |
| A348   | EK3X9L102I5TH7  | CAAGAAATCAAAAGCAGCTTG   | TTCTTATTCAITGTCCAGCTT    | 167                           | 123                               | 0.97                                  | 0                       |                        |                             |                           |
| A349   | EK3X9L101AGNDJ  | TGGCGTAGTGGTTAAGTGCT    | CAAACAAAATGAACAGGGC      | 192                           | 152                               | 0.91                                  | 0                       |                        |                             |                           |
| A350   | EK3X9L101DOOZ2  | CTGGAATCCCATTCTTTG      | ATTGCTGATGACGGATGGAT     | 142                           | 102                               | 0.96                                  | 0                       |                        |                             |                           |
| A351   | EK3X9L101C4567  | TAGCACAAACCAACCCAA      | AAAAAGCCCTGCAATCATTT     | 185                           | 145                               | 0.97                                  | 0                       | yes                    |                             |                           |
| A352   | EK3X9L101CK5FS  | ACCATGGACTGCCAAAAGAG    | GGCCCTCTGCTTACCAGG       | 161                           | 122                               | 0.95                                  | 0                       |                        |                             |                           |
| A353   | EK3X9L101EEV1K  | GGGGGATTTCAGAAAACAGG    | GGATTCAGACCCGGCTTTAG     | 162                           | 122                               | 0.96                                  | 7                       |                        |                             |                           |
| A354   | EK3X9L102ICLCR  | CGGCCATTTTGAATGATCT     | TGCCAAGAAGTTGGAAGACA     | 166                           | 125                               | 0.93                                  | 7                       |                        |                             |                           |
| A355   | EK3X9L101DY4ZE  | AGCCCAAGGTAAGCAGAA      | CATCTTTGTTCTCTGGCAG      | 149                           | 108                               | 0.99                                  | 2                       | yes                    | 19                          | 44,681,437                |
| A356   | EK3X9L101AOG35  | TATCTTGGCAGGAAGTTGG     | GAAAAGAGAAGCAGGGAATGA    | 146                           | 105                               | 0.97                                  | 2                       |                        |                             |                           |
| A357   | EK3X9L102GVD2Y  | ACCATCCAGCAATTCACCTC    | CCATTCTCACCCCTCACAT      | 164                           | 124                               | 0.97                                  | 2                       | yes                    | 4                           | 201,844                   |
| A358   | EK3X9L101BZFRW  | AGCCTTCAGGCTTCTCTG      | CATTTGCAAAATGGACACCTT    | 166                           | 126                               | 0.92                                  | 2                       | yes                    | 72                          | 7,242,987                 |
| A359   | EK3X9L102JGWHQ  | ATACGCTGAAACGGAGATTG    | GGGGCTCTACTTCTGTCAC      | 167                           | 127                               | 0.97                                  | 14                      |                        |                             |                           |
| A360   | EK3X9L101CSTA6  | GGTAGCACTTCACTCAGCCG    | GCACGCCCTCTGTAATTTT      | 166                           | 126                               | 0.98                                  | 2                       | yes                    | 9                           | 72,773,335                |
| A361   | EK3X9L102F2DRH  | AACACACCATCAGACCAACC    | GAGTCAGGCTGGAGATTTGG     | 194                           | 154                               | 0.98                                  | 4                       | yes                    |                             |                           |
| A362   | EK3X9L101CT3DB  | TACCAGGACTGCCAAAAG      | GCATGGTATCTCTTCCAGG      | 146                           | 105                               | 0.96                                  | 6                       |                        |                             |                           |
| A363   | EK3X9L101AULJ8  | GGTGTGCTCTGATGCTGAA     | AATGGAATGAAACACTGCC      | 168                           | 128                               | 0.97                                  | 5                       |                        |                             |                           |
| A364   | EK3X9L102H1MD3  | TGTATTTCCATGTTGCTCC     | TGTCAAAACAGAAACAGCCA     | 151                           | 111                               | 0.95                                  | 2                       | yes                    | 18                          | 474,687                   |
| A365   | EK3X9L101ES7D3  | CTCGGGAAGCAAAATCTCG     | TGTTTGTGTTTTCAGGTTG      | 196                           | 156                               | 0.95                                  | 6                       |                        |                             |                           |
| A366   | EK3X9L102FHQAQ  | GGACCCAGCCTGTACAGATA    | TTGGTGGGCTTCAAAAT        | 201                           | 162                               | 0.93                                  | 2                       | yes                    | 58                          | 7,346,355                 |
| A367   | EK3X9L102I6LIN  | ACTGCCAGAGCCCAAGTAA     | GTCCTTTTCCCACTTCT        | 173                           | 133                               | 0.97                                  | 2                       |                        |                             |                           |
| A368   | EK3X9L102JX8L2  | GGAAACGCACTGTGTTGCA     | GATTAAGCATATGTTCCCAA     | 165                           | 122                               | 0.97                                  | 2                       | yes                    | 8                           | 76,341,113                |
| A369   | EK3X9L102GWT1S  | GACCTCTCCTGTTGGCTCAG    | GTCATTGGCCGACATCTTT      | 191                           | 151                               | 0.96                                  | 23                      |                        |                             |                           |
| A370   | EK3X9L102JBOOT  | CAACATTCAGCATTTCAGC     | AGTAACTTTCAGTGCCG        | 156                           | 116                               | 0.90                                  | 9                       |                        |                             |                           |
| A371   | EK3X9L102GSG4U  | CCTACCAACTGACTGGAAGA    | TTTTCTGGGAGTTCTGGTTG     | 171                           | 130                               | 0.91                                  | 13                      |                        |                             |                           |
| A372   | EK3X9L101DD81C  | TGTGTGATGCAACTACAAGG    | AGCGGCCAGAAACCAACA       | 155                           | 115                               | 0.98                                  | 17                      |                        |                             |                           |
| A373   | EK3X9L102GJN13  | GGCCTGTGACTCAGCACTTT    | TGCACCACTTTCATTTT        | 191                           | 151                               | 0.94                                  | 2                       | yes                    | 57                          | 5,155,828                 |
| A374   | EK3X9L102HM0KE  | TGCAGTCTCCAGCAACAT      | TGGCCTTGGAGAAAGATAA      | 189                           | 149                               | 0.92                                  | 6                       |                        |                             |                           |
| A375   | EK3X9L101CNIJ4  | ACCCTCGACTTACCAAGCA     | CCATGAACTGCCAAAAGAAA     | 167                           | 127                               | 0.97                                  | 2                       |                        |                             |                           |
| A376   | EK3X9L101DYFL4  | TGAAATGTGCAAGAACCCTGG   | CAATGGCTCTGTGTTCTCT      | 185                           | 144                               | 0.97                                  | 7                       |                        |                             |                           |
| A377   | EK3X9L101DFG2C  | GCGGAAGATTGATGACAAGG    | TGCTGCTAAGCAGAAATACCAAC  | 159                           | 114                               | 0.88                                  | 5                       |                        |                             |                           |
| A378   | EK3X9L102F97Q0  | AGCCCTACAGCAGCTTCGG     | GTAGGCTGACAGACCTGGCT     | 183                           | 145                               | 0.92                                  | 8                       |                        |                             |                           |
| A379   | EK3X9L102JNZE5  | CCTTTGAATATGTTGTTGGC    | TTCTCTGTGATACTGTCCAAA    | 157                           | 113                               | 0.98                                  | 11                      |                        |                             |                           |
| A380   | EK3X9L102IIZCH  | TCTCTGGCACTTCAAAGGC     | TGATGGAGAAAAGGGTCTG      | 169                           | 129                               | 0.99                                  | 2                       | yes                    | 186                         | 543,457                   |
| A381   | EK3X9L101CQR52  | CGAGACTTCGCTTGCACAC     | AATGAAACTGCCCCAGTCC      | 166                           | 126                               | 0.94                                  | 9                       | yes                    | 12                          | 1,357,538                 |
| A382   | EK3X9L102HT88N  | GGCTGTTGACTGTTGTGAA     | TTGGGTTTAAACACTTCTGA     | 154                           | 113                               | 0.95                                  | 1                       | yes                    |                             |                           |
| A383   | EK3X9L101DKL12  | TGACAAGCTAGGAGCTGTGAA   | CAGGGGATTTGGCTGAG        | 144                           | 105                               | 0.96                                  | 5                       |                        |                             |                           |
| A384   | EK3X9L102G2N3R  | TTGAGCACTTCCCTTTTG      | TGAGTAGTGGGAGCTTGG       | 156                           | 117                               | 0.94                                  | 6                       |                        |                             |                           |
| A385   | EK3X9L102I7ONA  | TCCACACTTATCCAGAGGG     | TAGAAGCTGAGGGGAGGTT      | 136                           | 96                                | 0.96                                  | 1                       | yes                    | 146                         | 1,412,413                 |
| A386   | EK3X9L101BNWGF  | CCCACCTTACAGGCTGAGG     | TTTGCTTTAATAACCCAGACA    | 192                           | 149                               | 0.98                                  | 1                       | yes                    | 74                          | 2,692,157                 |
| A387   | EK3X9L101EVFH1  | CAAGTTGTTCCCTTGTCTGA    | CCACTGATTGTGATTTGACTG    | 167                           | 124                               | 0.89                                  | 1                       | yes                    | 10                          | 24,477,942                |
| A388   | EK3X9L102INT62  | TGTAAGCCACCTGCTTCAAT    | ATTCTGAGCTGGCCATCTT      | 168                           | 128                               | 0.96                                  | 2                       | yes                    | 41                          | 6,205,165                 |
| A389   | EK3X9L101EW5JW  | GGCCGCAATTGATGACATTC    | ATGTGGCTGTCTGTAACCCC     | 142                           | 104                               | 0.98                                  | 2                       | yes                    |                             |                           |
| A390   | EK3X9L102FEYRB  | CTCACGTGCGGAGAAATAGG    | TTCTGATCTTTTACGCGCT      | 192                           | 152                               | 0.99                                  | 1                       | yes                    | 39                          | 17,610,294                |
| A391   | EK3X9L101BR66V  | GACAAGGGAACCACTCTGG     | CAAGTTTTCTGGGACTGGA      | 170                           | 130                               | 0.98                                  | 1                       |                        |                             |                           |
| A392   | EK3X9L101DS72Y  | ATTGGACGAGACAATGGGAT    | TACCCCTAACTGCTCTCCC      | 204                           | 164                               | 0.89                                  | 2                       |                        |                             |                           |
| A393   | EK3X9L101EGYU4  | GATTGTGTGGCTCCCAATG     | ATGGCTCAGATCCTTGCACT     | 176                           | 136                               | 0.94                                  | 1                       | yes                    | 74                          | 4,368,719                 |
| A394   | EK3X9L102I8NU3  | AACCAACCTGTTCCGTTG      | AGCCCTGGCAGACTAGTT       | 155                           | 115                               | 0.97                                  | 8                       |                        |                             |                           |
| A395   | EK3X9L101BROU1  | ACAATTGTGAGGATGGACA     | TGTGGCTGGGTTGTTGTA       | 157                           | 117                               | 0.91                                  | 10                      |                        |                             |                           |
| A396   | EK3X9L102H9XCH  | GTTCCACACTCAAAGGGGG     | TGGAGTGAAAAGACACATGG     | 162                           | 121                               | 0.97                                  | 2                       | yes                    | 15                          | 33,021,381                |
| A397   | EK3X9L102I4R9E  | GGAAATGCTTTCGCAACT      | AGGTTGAGCAACACTGATGC     | 185                           | 145                               | 0.97                                  | 2                       |                        |                             |                           |
| A398   | EK3X9L101EJ2CR  | CAGAAATCCCACTGATCTCA    | GCCTGGTCTGCTCCCTC        | 179                           | 140                               | 0.93                                  | 1                       | yes                    | 15                          | 22,588,500                |

A2

| target ID | read ID GenBank SRA010805 | F-Primer 5'-3'            | R-Primer 5'-3'            | product length in bp amplicon | product length in bp w/out primer | Mastodon-loxAfr1 alignment % identity | # of hits isPCR loxAfr1 | consensus for all taxa | aligned loxAfr3 scaffold ID | loxAfr3 scaffold position |
|-----------|---------------------------|---------------------------|---------------------------|-------------------------------|-----------------------------------|---------------------------------------|-------------------------|------------------------|-----------------------------|---------------------------|
| A399      | EK3X9LI01EU20A            | GACTAAATGGGCACACCAGC      | TCCATTTCATTTTGGACAATTTC   | 168                           | 124                               | 0.97                                  | 7                       | yes                    | 18                          | 2,631,071                 |
| A400      | EK3X9LI021SJEZ            | CTCCAGCCCCCACTTTT         | GGTCTTGGAGGAAGGAAAGC      | 192                           | 154                               | 0.98                                  | 4                       |                        |                             |                           |
| A401      | EK3X9LI02FGAXJ            | TCCAGAAGGGACATGGTAATG     | CTCCTGAAGCCGTGTCTCTC      | 176                           | 135                               | 0.95                                  | 1                       | yes                    | 4                           | 66,397,755                |
| A402      | EK3X9LI02HLL0U            | GTGAAAAGCTGCATGCTGAA      | CCAAGTTACTCCAGGGGTT       | 163                           | 123                               | 0.91                                  | 7                       |                        |                             |                           |
| A403      | EK3X9LI02HN8L1            | AAGGTGACCCTATGTAAAGC      | TGCAATTTAGGCTGTCACTTG     | 182                           | 140                               | 0.97                                  | 1                       |                        |                             |                           |
| A404      | EK3X9LI02GSBFJ            | AGTGGAAATGTGGTGGGTGAT     | TCCTGGGTTATTTGGGTTG       | 144                           | 104                               | 0.99                                  | 2                       | yes                    |                             |                           |
| A405      | EK3X9LI01CSU10            | TCCAGAGCCAACACAGACAG      | TCATTCTCTGTTCTCTGTCACTTTC | 177                           | 132                               | 0.98                                  | 19                      | yes                    | 14                          | 2,295,033                 |
| A406      | EK3X9LI02HCWKX            | ACTCTGACTGTGTGGCCT        | TGTGCAGAAGGACAACCTCAA     | 172                           | 131                               | 0.98                                  | 3                       |                        |                             |                           |
| A407      | EK3X9LI01BR75A            | TGCTCTCCAACCTCAGAGT       | ATCTAGCCCTGGCAGCAGT       | 148                           | 109                               | 0.90                                  | 2                       | yes                    | 4                           | 25,548,875                |
| A408      | EK3X9LI01CG92M            | TCCTAGGGCCCTGACTGAG       | GAGGTGTCACTGAGGCCG        | 177                           | 140                               | 0.99                                  | 1                       |                        |                             |                           |
| A409      | EK3X9LI0214LVA            | CACGTACATCCACCCTCT        | CGAGTGGTGGTGACAGAGAA      | 175                           | 136                               | 0.98                                  | 1                       | yes                    | 1                           | 55,090,741                |
| A410      | EK3X9LI0216U6P            | TAGTTCCTCTGTCCCCAGC       | TGGAAGCATGATGTAGCAGC      | 174                           | 134                               | 0.98                                  | 1                       | yes                    | 1                           | 26,114,494                |
| A411      | EK3X9LI01DY40E            | GAAAAGTTTCTCCGCAAAA       | TATGGCTTTGCCAGGATTTTC     | 143                           | 102                               | 0.99                                  | 1                       |                        |                             |                           |
| A412      | EK3X9LI01D7D35            | GAAATAAGCTGATGAGAGGAAACC  | GGACAGAGAGCCAACACAG       | 181                           | 137                               | 0.96                                  | 1                       | yes                    | 5                           | 71,661,785                |
| A413      | EK3X9LI02HY1W8            | GCCTGTCTCAAAGGCTCAT       | AGAAGCAGAAAGTGGCAGT       | 172                           | 132                               | 0.93                                  | 24                      |                        |                             |                           |
| A414      | EK3X9LI01CR2K5            | TGAGAAATGTGGGATAAAGGG     | AGCCACTCTCAACTCACTGGG     | 167                           | 124                               | 0.96                                  | 1                       | yes                    | 43                          | 7,175,416                 |
| A415      | EK3X9LI02FZ53G            | TACCAATGATGCAGCAGCC       | CGAGATCCCAAGAAGCTAGTG     | 146                           | 105                               | 0.92                                  | 6                       | yes                    | 22                          | 13,947,214                |
| A416      | EK3X9LI02F0KPQ            | ACAAATCACTGTCTCTCACAT     | TGTTGCATCTCCTGTCTGG       | 186                           | 142                               | 0.96                                  | 10                      |                        |                             |                           |
| A417      | EK3X9LI02FK9G5            | CCCTCTGCACAGCTGAAAC       | CTGGAAACAGACAGGAGCCG      | 176                           | 137                               | 0.88                                  | 4                       |                        |                             |                           |
| A418      | EK3X9LI02ICEX4            | AGATGAGCTCCCCAGGCT        | TGAATGTTTGGCTATTGGCT      | 158                           | 118                               | 0.97                                  | 3                       | yes                    | 6                           | 46,290,310                |
| A419      | EK3X9LI01AXH9B            | ATCGTTGGTGGCTATTGTGC      | CCTGATGGATCAGAACAAACA     | 165                           | 123                               | 0.95                                  | 3                       |                        |                             |                           |
| A420      | EK3X9LI01CN0BK            | GCAGGGAGCATCAAAGAAG       | TTTTTGGCAAGCCCTCAGT       | 153                           | 113                               | 0.92                                  | 3                       |                        |                             |                           |
| A421      | EK3X9LI02F7KM5            | CACATGGCTATGCCAACAA       | TTGCTTTGAATGATCTCCAG      | 172                           | 131                               | 0.92                                  | 5                       | yes                    | 72                          | 2,595,307                 |
| A422      | EK3X9LI01CWJLJ            | CTTCTCTGGAGCTCTGGTGC      | AAATCCGTTGCTGTCTGAGTC     | 161                           | 121                               | 0.87                                  | 7                       |                        |                             |                           |
| A423      | EK3X9LI02FQPRM            | CCACAAGTTTCCCAAATATC      | CAGGCAAGAAAGAAAGACCTTG    | 189                           | 146                               | 0.97                                  | 3                       | yes                    | 9                           | 16,167,935                |
| A424      | EK3X9LI01D0RFU            | GACCAAGGAAAGGTCATGGA      | CCACTTTAAGACCCAGACGC      | 182                           | 142                               | 0.94                                  | 4                       |                        |                             |                           |
| A425      | EK3X9LI01BLD35            | GTCAGCTACAGCGACTTCGG      | GACCTGGCTGGTGGGGTC        | 174                           | 136                               | 0.89                                  | 8                       |                        |                             |                           |
| A426      | EK3X9LI01ANCQQ            | ACTGGCTGATCTTTCCGGA       | CCCCACATGTCTGTCACTG       | 175                           | 135                               | 0.90                                  | 16                      |                        |                             |                           |
| A427      | EK3X9LI02FKADD            | AAGAATTTCCATCATCAGCTT     | GAGCTTCCAGAGCTGTTGT       | 197                           | 155                               | 0.99                                  | 13                      |                        |                             |                           |
| A428      | EK3X9LI02JA4H2            | GGGAGAGAACACGCAAGTC       | GCAGACTCTGGACTGCTGG       | 152                           | 113                               | 0.92                                  | 5                       |                        |                             |                           |
| A429      | EK3X9LI0212D2J            | GGGAGGTCAGCCTAATGGGA      | TGGGATGTGGAAATGTTTTCA     | 166                           | 126                               | 0.98                                  | 21                      |                        |                             |                           |
| A430      | EK3X9LI021S177            | GCTGCACTCTGCTTATCAAGC     | CCATGGACTGCCAAGAGAAT      | 165                           | 122                               | 0.97                                  | 3                       |                        |                             |                           |
| A431      | EK3X9LI021HJ80            | TCATTCCAACAGAACAGAGGA     | TGCAGGTTGTAATATGTCTATCC   | 156                           | 111                               | 0.98                                  | 26                      | yes                    | 1                           | 93,100,472                |
| A432      | EK3X9LI02H27IT            | TGTCAGGGTCAACACCAGTC      | CTTTCTTGTGGGGAGGT         | 143                           | 104                               | 0.98                                  | 3                       | yes                    | 15                          | 49,396,357                |
| A433      | EK3X9LI02H51B0            | GCGCACCTTAGTCTTCAAGG      | CGAAGAAAAGTTGAAGTTGCA     | 172                           | 129                               | 0.91                                  | 5                       |                        |                             |                           |
| A434      | EK3X9LI02HK8QF            | GGGAGAGGTCCAAACCTGCAC     | ATTTCTTCCAGCTGGTTGGC      | 167                           | 127                               | 0.94                                  | 3                       |                        |                             |                           |
| A435      | EK3X9LI01C7EDZ            | TGATACTGGTGAGGAAATCTTGAA  | CATGGTATATTCATTACAGGGCA   | 179                           | 132                               | 0.91                                  | 2                       | yes                    | 88                          | 692,684                   |
| A436      | EK3X9LI01EG202            | TATGTACTGGAGCCCTGGTG      | TACCCAACCCATTGTCATCC      | 166                           | 126                               | 0.88                                  | 7                       |                        |                             |                           |
| A437      | EK3X9LI02HV0XV            | TAAACACTAGCAAGGGGGCCA     | TCTGTTGTACCCAGGCATCA      | 181                           | 141                               | 0.94                                  | 2                       |                        |                             |                           |
| A438      | EK3X9LI021XGA3            | ATAGGGACCATTTCTTGGC       | AAAGTGGCCATGATTTGGAG      | 166                           | 126                               | 0.94                                  | 2                       | yes                    | 81                          | 531,445                   |
| A439      | EK3X9LI01A679X            | TGGATTCCACAGCAAAAGCA      | AATCCTCCAACTCACAGGCT      | 179                           | 139                               | 0.98                                  | 3                       | yes                    | 43                          | 2,511,708                 |
| A440      | EK3X9LI01BCLJT            | TGGGTGACATCCAGCAAGT       | TGTCCAAAACACTGATTAATAACA  | 191                           | 147                               | 0.96                                  | 6                       |                        |                             |                           |
| A441      | EK3X9LI02GSTFP            | CAGAGGGAAGGTTGAAGGAA      | GGCAAACTCACTGGCTGCT       | 180                           | 140                               | 0.92                                  | 2                       |                        |                             |                           |
| A442      | EK3X9LI02HBFQX            | TGTTCTTACTCTGTCTTAGCTCCA  | TGTTGATTGCTCTTAGAGTGTG    | 173                           | 126                               | 0.92                                  | 3                       | yes                    | 23                          | 4,746,893                 |
| A443      | EK3X9LI01B6FSD            | TCITTTTACTTCTCCAGTAAACCA  | ATCTGAGGGCTGAGCTGCTA      | 152                           | 107                               | 0.96                                  | 3                       | yes                    |                             |                           |
| A444      | EK3X9LI02GB207            | TGGAGTAAATTTCCAGCAG       | CCTACGCTCCATTTTCCCA       | 145                           | 105                               | 0.87                                  | 2                       |                        |                             |                           |
| A445      | EK3X9LI01AXKEV            | AGGCAACAAGGACAAAGCTAA     | AAAGCAACAATAATGTGGGG      | 154                           | 113                               | 0.98                                  | 3                       | yes                    | 54                          | 1,474,214                 |
| A446      | EK3X9LI01AT135            | TAGCGTTTGTCTGGACCC        | CCTGAAGCCTAACTTCAACTGT    | 175                           | 133                               | 0.93                                  | 4                       |                        |                             |                           |
| A447      | EK3X9LI02G13TL            | TTTACCCACATGAACAGTGA      | GCCTTTGAGCAGTTGATGTT      | 165                           | 124                               | 0.91                                  | 2                       |                        |                             |                           |
| A448      | EK3X9LI01EV5K6            | CATTGTCCAGTTGTGAGGA       | GGCATCAGCATTGGAAGAAG      | 177                           | 137                               | 0.98                                  | 2                       |                        |                             |                           |
| A449      | EK3X9LI01BMRPD            | CTGCTAGTGAGGGAAGGCAC      | GTAATGACCTCAGCCGCTT       | 180                           | 140                               | 0.98                                  | 3                       |                        |                             |                           |
| A450      | EK3X9LI0214W2R            | GCAGGCCTACATTTAAAGTTCA    | AAGGGTCCAACTGAATGTC       | 148                           | 106                               | 0.99                                  | 2                       | yes                    | 87                          | 1,987,911                 |
| A451      | EK3X9LI01D1YJ5            | AGCACITGGAATTTCCCTTCA     | TTCAAGTGAAGGAAGGCTCTC     | 176                           | 134                               | 0.91                                  | 5                       | yes                    |                             |                           |
| A452      | EK3X9LI02HI63G            | GGGTCCCTGGTGTAGT          | TCTTCTCTCCCTGAGT          | 183                           | 144                               | 0.99                                  | 26                      |                        |                             |                           |
| A453      | EK3X9LI02H1M9M            | TGTGCCATCTCACAAATCAT      | GAATGCACTTTAGAAGCGAGG     | 184                           | 143                               | 0.97                                  | 10                      |                        |                             |                           |
| A454      | EK3X9LI01CFAU6            | TGTATGGTCTTGTCTGGAGC      | TACATTAACACTACTGTACAGGGA  | 181                           | 136                               | 0.95                                  | 2                       | yes                    | 1                           | 53,667,867                |
| A455      | EK3X9LI01BU2XL            | GGGGTTTACAAGTAGGAAGTTCA   | CCATGCTGACATTGAGGATAAC    | 187                           | 142                               | 0.99                                  | 26                      |                        |                             |                           |
| A456      | EK3X9LI021BDAS            | TCTCTGATCTGTGCTACTAAATTGG | AACCCCAAAATTTGATCCAAG     | 181                           | 136                               | 0.96                                  | 2                       | yes                    | 59                          | 4,864,244                 |
| A457      | EK3X9LI02FUTXB            | AAAACATAGTGACTTCCCTGA     | ACCATGAACTGTGGCCTCT       | 171                           | 129                               | 0.97                                  | 4                       |                        |                             |                           |
| A458      | EK3X9LI01D2PV3            | AGGTGAAGTATTGCTGGGTG      | GACACACTCAGCTCTCAA        | 148                           | 107                               | 0.98                                  | 14                      |                        |                             |                           |

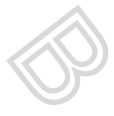

**Target and primer information for experimental round B:** read ID corresponds to the read in the short read archive SRA010805, beside primer sequences PCR product length with and without primers is given, as well as the percent identity of the respective mastodon-loxAfr1 alignment, "# of hits isPCR" gives a number how often the respective primer pair anneals to loxAfr1, and a "yes" in the row "consensus for all taxa" means, that sequence information is available for all taxa. The last two rows show scaffold ID and position of the targets used in the MCMCcoal analysis aligned to loxAfr3.

| target ID | read ID GenBank SRA010805 | F-Primer 5'-3'           | R-Primer 5'-3'           | product length in bp amplicon | product length in bp w/out primer | Mastodon-loxAfr1 alignment % identity | # of hits isPCR loxAfr1 | consensus for all taxa | aligned loxAfr3 scaffold ID | loxAfr3 scaffold position |
|-----------|---------------------------|--------------------------|--------------------------|-------------------------------|-----------------------------------|---------------------------------------|-------------------------|------------------------|-----------------------------|---------------------------|
| B001      | FBUJGPD11GZ51K            | CGGAGGGGTCATATAGAGGG     | CTGCTCCAAGCCATACCTA      | 279                           | 239                               | 0.97                                  | 0                       |                        |                             |                           |
| B002      | FBHG2QE12HD6LJ            | CACGCCCTAGTCTTCAAGGTG    | GCCAAAAGTGAGTGAGGAGG     | 299                           | 258                               | 0.95                                  | 2                       |                        |                             |                           |
| B003      | FBHG2QE07EDHIV            | TGAGTGAGACAACAGCATCCA    | GATCTGATCCACAACCAGTCA    | 253                           | 211                               | 0.89                                  | 2                       | yes                    | 98                          | 2,965,472                 |
| B004      | FBHG2QE16JWWC2            | GCCTTTGCATAGTCAATAAAAACA | TATTTGTGCCGTTCCAAAG      | 258                           | 215                               | 0.97                                  | 0                       |                        |                             |                           |
| B005      | FBUJGPD11GXNVE            | ATCCTGGCTAAAGCAGAGA      | GGATTAATTTGCTCAGCATCG    | 285                           | 245                               | 0.92                                  | 0                       |                        |                             |                           |
| B006      | FBHG2QE09FLWZM            | CCTTGTCTGCAGAAAACAAA     | AGCAAAAAGGTACACCAGGG     | 269                           | 229                               | 0.97                                  | 1                       |                        |                             |                           |
| B007      | FBUJGPD16J0WE2            | TGATGAACAGCCACAGACA      | CAAAATCTGGATGGTAATCAGTGT | 247                           | 203                               | 0.90                                  | 1                       |                        |                             |                           |
| B008      | FBHG2QE09FMB5Z            | CCCAAGGGGTATCGTTACTT     | CCTGGCCCTTTTCTAGTCT      | 257                           | 216                               | 0.99                                  | 1                       | yes                    | 58                          | 11,372,720                |
| B009      | FBHG2QE16JSW1W            | GAAGCTGTCCAGGACGTGTGT    | GACTGTCACTTGTCTGGAGCC    | 267                           | 227                               | 0.91                                  | 0                       |                        |                             |                           |
| B010      | FBUJGPD12HGXD             | TTACTGGTTCAITGGAGCCCT    | TTCTAGTCAATGTAAACCGAATGA | 221                           | 177                               | 0.90                                  | 1                       | yes                    |                             |                           |
| B011      | FBUJGPD14I1254            | CTGAATGTCTATCCAGGGC      | CCCTGCTGATTTTCTCTTG      | 255                           | 215                               | 0.97                                  | 1                       | yes                    | 58                          | 11,826,278                |
| B012      | FBHG2QE11GSC9C            | GGAGTGAGGAAGCTGGTTTG     | ACGCTGAGTTTGTGGGAAA      | 249                           | 209                               | 0.92                                  | 1                       |                        |                             |                           |
| B013      | FAGAMMR16JW3QK            | CTGGTGCAAGCCAATAGTGA     | CCTGCCAGCTCAACAGTA       | 229                           | 189                               | 0.91                                  | 2                       |                        |                             |                           |
| B014      | FBHG2QE07D419I            | TCCTGGAGGGAACTTCACTG     | GTCACCTCTGTGGCTTGG       | 255                           | 215                               | 0.97                                  | 1                       | yes                    | 1                           | 12,744,769                |
| B015      | FBHG2QE16JWYU8            | GGAGCATGCTGGTGTACTTC     | GCATTGCGTTAGGCAAACT      | 263                           | 222                               | 0.91                                  | 1                       |                        |                             |                           |
| B016      | FBUJGPD12HN83D            | GGCAATAGCAAGGGAAGCTG     | GCGATCCAGAGTCAAAAGG      | 224                           | 184                               | 0.96                                  | 1                       |                        |                             |                           |
| B017      | FAGAMMR16JSX5T            | TGGCTTCGAGAATGGTTTTTC    | AAAGAGAAGGAGGCCACAT      | 252                           | 212                               | 0.97                                  | 2                       | yes                    | 36                          | 23,445,001                |
| B018      | FBHG2QE12HLRU             | ACACAGGCAAGCTTGAAC       | ATATGGGATGGGATGAG        | 241                           | 204                               | 0.96                                  | 2                       |                        |                             |                           |
| B019      | FBUJGPD10F6XEK            | AAGGCACCATGAATTTGGTC     | GTGAATCTCTCGCTGCTC       | 252                           | 212                               | 0.95                                  | 2                       |                        |                             |                           |
| B020      | FBHG2QE08EPYQS            | TCACAACCTGGACCAATAAGCA   | TTGTTTGTCTTTCACATGCC     | 261                           | 220                               | 0.93                                  | 0                       |                        |                             |                           |
| B021      | FBHG2QE12H88LV            | TCCCATTGTCTCAGTTTCC      | TTCCAACCTATAGGACCCCT     | 242                           | 202                               | 0.95                                  | 0                       |                        |                             |                           |
| B022      | FAGAMMR16JUS2T            | ACTAGTCTGGCAGAGTTGGTTT   | TCAGGGTCCAGAATGAAAGG     | 244                           | 202                               | 0.99                                  | 1                       | yes                    | 7                           | 83,494,142                |
| B023      | FBHG2QE12HMIZ6            | CAGTGAACAGCCCATATATCCA   | GAGAGGCTCACTGTCCAGG      | 244                           | 201                               | 0.92                                  | 1                       | yes                    |                             |                           |
| B024      | FBUJGPD12HFLXV            | AGAGTCCCTCTCTGTTCTGACA   | TACCGCCTGAGTCAACCTCT     | 242                           | 199                               | 0.95                                  | 2                       |                        |                             |                           |
| B025      | FBUJGPD11GYZSZ            | TTTATTTTCATCTTATGGAGGCA  | CCAGCAGGAATGTGCTGTT      | 243                           | 200                               | 0.97                                  | 2                       | yes                    | 19                          | 35,638,888                |
| B026      | FBHG2QE07EC90R            | CTTGTATGCTCCAGGAAAT      | GCACTGTCTATTTGGCCCTC     | 245                           | 205                               | 0.99                                  | 0                       |                        |                             |                           |
| B027      | FAGAMMR16JY40W            | CATAGGGACTGTGGGACA       | TGTCATAGGCTTTGGATGT      | 232                           | 192                               | 0.99                                  | 1                       |                        |                             |                           |
| B028      | FBHG2QE07D41FW            | TTGTGGCCACTGTCAATGAG     | GGTTCAGTGTGGCTGCACT      | 257                           | 217                               | 0.96                                  | 2                       |                        |                             |                           |
| B029      | FBUJGPD11GPK4Y            | ATGAGCTGCTGGAAACATCC     | GCAAGTGTGGAAACAGACAAA    | 241                           | 201                               | 0.96                                  | 2                       | yes                    | 10                          | 20,603,229                |
| B030      | FBHG2QE09FJ6P0            | TTGATACTGACTCTGGGGA      | GCAACCGTATAGGGCAGAGA     | 233                           | 193                               | 0.92                                  | 2                       | yes                    |                             |                           |
| B031      | FBUJGPD10GCK4V            | GCAAAACCAACCTTCAAATCCA   | GTGGTTTGACACAGTGGCTG     | 238                           | 197                               | 0.96                                  | 2                       |                        |                             |                           |
| B032      | FBHG2QE11G06BN            | AAAACAATCAGCACCCGAAAG    | TGGATGTCTCAGGCTCTTCT     | 240                           | 200                               | 0.98                                  | 2                       |                        |                             |                           |
| B033      | FBHG2QE11GXV6K            | AGTTGGTGTTCACCCAGG       | CCAGCCATCTGGTAAGAGCA     | 231                           | 192                               | 0.97                                  | 1                       | yes                    | 28                          | 34,196,601                |
| B034      | FBUJGPD14I07WJ            | GATGATCCCGTAGCTGGGA      | GGAAGCACTCAAGGAAGGAA     | 242                           | 202                               | 0.95                                  | 0                       |                        |                             |                           |
| B035      | FBHG2QE16JZZ3C            | TGGCTTGGACTCAAAGGAAA     | AGCAGCTCACCCCAAGT        | 242                           | 204                               | 0.94                                  | 1                       | yes                    | 9                           | 77,702,870                |
| B036      | FBHG2QE09FOE7E            | CACAACCTGAAAATGGGCA      | GCGTATTCGGAAGACCTGTT     | 261                           | 221                               | 0.98                                  | 2                       | yes                    | 84                          | 991,369                   |
| B037      | FBUJGPD16JWU00            | GGGGATATCCACGCTGACT      | GATGATTGAGGTGGGGAATG     | 245                           | 206                               | 0.99                                  | 1                       | yes                    | 31                          | 18,100,580                |
| B038      | FBUJGPD11GZYE3            | CCACCACTCTCTAGGGTCT      | TGATGAGCCCATCTGCTGT      | 223                           | 184                               | 0.96                                  | 1                       | yes                    |                             |                           |
| B039      | FBHG2QE11GW4A7            | GCCAAAGCTAGGCCAAATA      | TCCTGGGCAAAACCTTTTA      | 241                           | 201                               | 0.88                                  | 1                       |                        |                             |                           |
| B040      | FBUJGPD14I0UNS            | CTGTCACTGTTGTGATTTGTC    | GAGCTGAAGTGAAGGGATCG     | 218                           | 176                               | 0.98                                  | 1                       | yes                    | 29                          | 28,748,390                |
| B041      | FBHG2QE07D82HF            | GTACTGCCTGTGGTGTGGG      | ACAGCTGCCTGCACAACT       | 213                           | 174                               | 0.98                                  | 2                       | yes                    | 32                          | 27,727,719                |
| B042      | FBHG2QE14IYSKF            | CCCTTGTGGCAGCCACT        | CCATGGACTACCAAAAGAACG    | 221                           | 182                               | 0.91                                  | 0                       |                        |                             |                           |
| B043      | FBHG2QE06DG3P0            | GGCAAGCTAGTCGAATGTT      | GCTCAGGTCACTCCACTTT      | 233                           | 193                               | 0.97                                  | 2                       |                        |                             |                           |
| B044      | FBUJGPD13H5NWL            | CCAGGGACCTCTGTCTTAGC     | CTGATCAGCTTGTATTGCTCC    | 241                           | 200                               | 0.99                                  | 2                       | yes                    |                             |                           |
| B045      | FAGAMMR16JSCSH            | CCCAGACTGGCTTACCTCTG     | AGTGGACTGCTGTTTCTCTG     | 232                           | 192                               | 0.98                                  | 0                       | yes                    |                             |                           |
| B046      | FBUJGPD12HL41T            | CCCACCCACCACTTCTTCC      | GGGTCCAGCCAGGCTCTC       | 224                           | 186                               | 0.98                                  | 0                       |                        |                             |                           |
| B047      | FBHG2QE09FTUFS            | CTACCTTGTAGCCCTGTGGG     | TGGCAATGATTTAGAAAGCTTAGA | 239                           | 195                               | 0.98                                  | 1                       |                        |                             |                           |
| B048      | FBHG2QE12HNQFY            | TGCTACCTTTGAAGCTGATTG    | CGCTCTTGTTAATGCTCACA     | 227                           | 185                               | 0.99                                  | 1                       | yes                    | 34                          | 14,004,436                |
| B049      | FBHG2QE12HNFYE            | GCTTTGCAACTCCAGTAGG      | ACCAATCTCAACAACCCAA      | 220                           | 180                               | 0.95                                  | 2                       |                        |                             |                           |
| B050      | FBUJGPD14I08KG            | CTTCTGGCTACCCAGCTC       | CCATGTGTCATCACATCCCT     | 244                           | 204                               | 0.92                                  | 0                       | yes                    | 72                          | 8,627,248                 |
| B051      | FBHG2QE14I0W8D            | CTTCAAGCTCTTCACTTTCA     | CAAGGAGCAGTGTTCAGACA     | 238                           | 194                               | 0.94                                  | 0                       |                        |                             |                           |
| B052      | FBHG2QE06DPH8U            | GGAGTGTCAAGGATTTCAATTT   | TTCTTATTCACTGCCAGC       | 226                           | 183                               | 0.89                                  | 1                       |                        |                             |                           |
| B053      | FBHG2QE10F9B25            | AGGAGTCCAGTTCGGGCTC      | CCAGGTCCGAAAGGTTGTA      | 233                           | 193                               | 0.87                                  | 1                       |                        |                             |                           |
| B054      | FBHG2QE15I9HEY            | AGCACCAACATCACCCCTC      | CATCAACAACAGGATGCC       | 230                           | 190                               | 0.94                                  | 1                       | yes                    |                             |                           |
| B055      | FBHG2QE15JFTE6            | GGATGCTGTTCCCGTATTA      | AGCCCTGTTTGTTGAACGG      | 232                           | 192                               | 0.99                                  | 2                       | yes                    |                             |                           |
| B056      | FBHG2QE15I9ECF            | AAACGTATACCATGTGCCAGG    | AGTCAGGTAAGGCATCGGA      | 217                           | 177                               | 0.96                                  | 2                       | yes                    |                             |                           |
| B057      | FBHG2QE07EA7D4            | ATGGTTAAGCCGTTGGCTG      | CGTTTAGCATGGATTGCGTA     | 221                           | 182                               | 0.91                                  | 0                       | yes                    | 0                           | 94,946,559                |
| B058      | FAGAMMR16JY0BL            | TCTTTCACCTAAAGCAGAAAA    | TGATGGCACCTAACAAACA      | 255                           | 215                               | 0.98                                  | 2                       |                        |                             |                           |
| B059      | FAGAMMR16J28Z2            | GAGGAGACTCTTGCTGCCAT     | GGCTGCTGTGGCTTACTTTT     | 250                           | 215                               | 0.97                                  | 0                       |                        |                             |                           |
| B060      | FBHG2QE09FK8Y2            | AACATCGCCAGGAAACAG       | GACTTTCATCGCTTGACAGATG   | 237                           | 197                               | 0.92                                  | 0                       | yes                    | 0                           | 95,646,240                |
| B061      | FBHG2QE14IQCGK            | TACTGGTCACTTTGTGGCCC     | GGGCTCTCTGCTGTTCTCT      | 227                           | 187                               | 0.98                                  | 0                       |                        |                             |                           |
| B062      | FBHG2QE12HEX4Q            | ATTCCCTCTGAGTCCCTTA      | AAAGGCACACATAAGCAGGG     | 242                           | 202                               | 0.96                                  | 1                       |                        |                             |                           |
| B063      | FBUJGPD16J0V4R            | TTCAAGCTGTTTCAACAAGAGA   | TATTTGAAGCCCGGCCATA      | 237                           | 196                               | 0.98                                  | 1                       | yes                    |                             |                           |
| B064      | FBHG2QE07D6YR8            | CCCTGAGCACTCTATCCAC      | CAAGGCTCTTGAACTAAGGG     | 225                           | 184                               | 0.99                                  | 1                       |                        |                             |                           |
| B065      | FBUJGPD13H8C94            | CCTTTGACGACAGATTACCC     | TTAACGGATCGCAACCTTAAT    | 229                           | 188                               | 0.94                                  | 1                       |                        |                             |                           |
| B066      | FBHG2QE12HEX4Q            | TGCAGGTTGTTAATGGGTCA     | TGTGCTCAGGAGGACCTGTA     | 215                           | 175                               | 0.96                                  | 1                       |                        |                             |                           |
| B067      | FBHG2QE16J219W            | TGGACCAATAAGCCACATCA     | AAAATACCCAGGATGGGTCA     | 220                           | 180                               | 0.90                                  | 2                       |                        |                             |                           |
| B068      | FBUJGPD16J21D6            | ACTCAGCTGGTGGCTCTCAC     | CCGAGAGGATGGACTAGAGG     | 203                           | 163                               | 0.97                                  | 2                       |                        |                             |                           |
| B069      | FBHG2QE07EBJ5T            | GGACCCCGTTTGACTGTG       | GGGAAAATATCCCACTCACTT    | 218                           | 179                               | 0.96                                  | 0                       |                        |                             |                           |
| B070      | FBUJGPD10F58F6            | GTTGTCGTTGATTTGCTTT      | GGCCTTCTATCTTATGCT       | 213                           | 173                               | 0.94                                  | 1                       |                        |                             |                           |
| B071      | FBUJGPD11GZ08X            | ATAAATACCCAGACCCGAG      | AAGTCAGTCAGTCAGGCTC      | 209                           | 169                               | 0.94                                  | 1                       |                        |                             |                           |
| B072      | FBHG2QE06DI9V4            | TAGTGGCCACAGGATTTGAG     | AAGCTGTGAGATGACTGGGG     | 241                           | 201                               | 0.93                                  | 2                       |                        |                             |                           |
| B073      | FBUJGPD11GRPKL            | CCACTGTACCTAACGGATGAA    | TGCTTCCCACTAATTTGGCT     | 264                           | 221                               | 0.97                                  | 1                       |                        |                             |                           |
| B074      | FBHG2QE06DM9RM            | GGCAATAGCAGAGGAAAAA      | GGAAGGCAATTTCTGTGGAA     | 262                           | 222                               | 0.96                                  | 2                       |                        |                             |                           |
| B075      | FBHG2QE15JAS8I            | CCCTTCTGTTAGTGGTGA       | ACTGGAGCCACAGGCAATG      | 264                           | 224                               | 0.90                                  | 1                       |                        |                             |                           |
| B076      | FBHG2QE12HEW2T            | TCTCTCTTAGGTTTTCGACTG    | CAAAGCACCATAACAATGTTCAA  | 234                           | 189                               | 0.91                                  | 2                       |                        |                             |                           |
| B077      | FBHG2QE16JVLHW            | GGCACACAGTTTCTCTTGA      | CGCACTTAAATACCCAGGACA    | 237                           | 196                               | 0.97                                  | 0                       |                        |                             |                           |
| B078      | FBHG2QE10F6FS2            | CCCAAACTTGGTGTGGTAGC     | CCCAAAAGGTCACTCCAA       | 267                           | 227                               | 0.97                                  | 1                       |                        |                             |                           |
| B079      | FBHG2QE12HGBVQ            | GAGGAGTGCCTGGTGGTGG      | AACCTCCCTTACAGAGACCC     | 249                           | 209                               | 0.98                                  | 2                       |                        |                             |                           |
| B080      | FBHG2QE07D6807            | CTCGTTTCCCAACAGATCAC     | TCTTGGATTTCACTACAGTGC    | 222                           | 180                               | 0.99                                  | 0                       |                        |                             |                           |
| B081      | FBHG2QE12HGIHL            | AAATTCCTGAGGCACTGAA      | CTCTGAGGCCACAATTAGCC     | 237                           | 197                               | 0.98                                  | 2                       | yes                    |                             |                           |
| B082      | FBHG2QE11GSXF6            | TTTCTATATGATTTCCAGAAAA   | GGGTCTGATGTCCCAAG        | 261                           | 216                               | 0.98                                  | 1                       | yes                    | 57                          | 12,897,274                |
| B083      | FBUJGPD11GQ5ME            | TGAGGGGAGAAAAGCAACT      | GTTGGAAGTTATGGGCAAA      | 258                           | 218                               | 0.99                                  | 2                       | yes                    | 19                          | 34,250,944                |
| B084      | FBHG2QE15JC08Y            | CCTGGCTTGGCTGACCTG       | ACACAGCAACCTAAACATCC     | 232                           | 193                               | 0.98                                  | 0                       | yes                    | 47                          | 1,420,135                 |
| B085      | FBUJGPD16J2J79            | CTGACCCCTTCTTCTGTGT      | CTATGTGTGTGCTCATCTC      | 247                           | 207                               | 0.94                                  | 0                       |                        |                             |                           |
| B086      | FBUJGPD16JVC7N            | GATGTGTCAAGTCCCACTT      | AAGAGGTGAAGATGAGGAGG     | 224                           | 183                               | 0.96                                  | 1                       | yes                    | 60                          | 8,341,199                 |
| B087      | FAGAMMR16J25MU            | AGGACAACTGAACACTGGC      | GGTTGCAATTTCTGCTCACTT    | 242                           | 201                               | 0.94                                  | 2                       |                        |                             |                           |
| B088      | FBUJGPD11GUBBF            | TGCATATCAGGAAACCTCA      | TGTGGTACTGCTGAAAA        | 226                           | 186                               | 0.97                                  | 2                       | yes                    | 45                          | 15,439,266                |
| B089      | FBUJGPD13HYV38            | GAAGGCAGCAGATATATGG      | CCCTCAAGGAGATGGATTGA     | 234                           | 194                               | 0.90                                  | 1                       |                        |                             |                           |
| B090      | FBHG2QE09FIK66            | TCCAACCACTGGGGAAAC       | GACAAAGTTGGCTCAGGGA      | 236                           | 196                               | 0.94                                  | 1                       | yes                    |                             |                           |



| target ID | read ID GenBank ID | F-Primer 5'-3'           | R-Primer 5'-3'           | product length in bp amplicon | product length in bp w/out primer | Mastodon-loxAfr1 alignment % identity | # of hits isPCR loxAfr1 | consensus for all taxa | aligned loxAfr3 scaffold ID | loxAfr3 scaffold position |
|-----------|--------------------|--------------------------|--------------------------|-------------------------------|-----------------------------------|---------------------------------------|-------------------------|------------------------|-----------------------------|---------------------------|
| B091      | FBUJGPD16JTCBG     | ACCCAAGGCCTCAGAAC        | CTCCCACTTCGGAGCAG        | 249                           | 213                               | 0.95                                  | 0                       | yes                    |                             |                           |
| B092      | FBUJGPD11GXN09     | GTTTCGTAGGTTGGCTTGAG     | TTCCATCTTCTTCATGATCC     | 209                           | 169                               | 0.89                                  | 0                       | yes                    |                             |                           |
| B093      | FBUJGPD10GB1KI     | GCAATGCTCAACAAGTTTGAC    | AATAACAAGTAGCAACAATGCGT  | 236                           | 191                               | 0.95                                  | 1                       | yes                    |                             |                           |
| B094      | FBUJGPD109F6MU     | GAAACCCCTTGGTTTAAGGC     | GGAGGGATCAAGACACAA       | 236                           | 196                               | 0.88                                  | 1                       | yes                    | 750                         | 2,039                     |
| B095      | FBUJGPD14IM969     | CCTGCATTTGTAAAGCTGA      | TGTTATTTGCTTGTCTCAGGG    | 236                           | 194                               | 0.99                                  | 0                       | yes                    |                             |                           |
| B096      | FBUJGPD16JV99F     | TTACCTAAATCACAAITGAAAA   | TATCAGCCCAATTTGCCTTTC    | 257                           | 213                               | 0.88                                  | 1                       | yes                    |                             |                           |
| B097      | FBUJGPD15JD9FZ     | AGCACTGCACGTGGACCT       | AAGTGTGAAGGTGACGGCAGG    | 228                           | 189                               | 0.97                                  | 0                       | yes                    |                             |                           |
| B098      | FBHG2QE12HGRZ5     | TCAAATCTGCTGCAAAAGACC    | TTCTTTGGGTAGTCCATGGTATG  | 216                           | 172                               | 0.96                                  | 0                       | yes                    |                             |                           |
| B099      | FBHG2QE08EZLLY     | ACAAGACTATCCCGCAGAGA     | CCATCTTTGACCGTCACTGA     | 244                           | 204                               | 0.93                                  | 1                       | yes                    |                             |                           |
| B100      | FBUJGPD10GEEFQ4    | GCATAGAGGGCTGTAGGGTG     | TAAAGTCTGTCAAGGAGGCT     | 223                           | 183                               | 0.98                                  | 1                       | yes                    |                             |                           |
| B101      | FBHG2QE13H59FF     | TGATGACACCATTTTGGAGC     | CTACCACAGGTCTATCCAGC     | 216                           | 176                               | 0.97                                  | 0                       | yes                    | 1                           | 75,524,245                |
| B102      | FBHG2QE13H9Q2Q     | AATGGCCAGGCTATGAGAGA     | GCATAATCTCCCCCATCTC      | 243                           | 203                               | 0.97                                  | 1                       | yes                    | 10                          | 34,024,629                |
| B103      | FBHG2QE16J11CA     | CCGGCACATTATGAACCTTC     | TGAACAGGGTGAAGGAGGTG     | 230                           | 190                               | 0.99                                  | 1                       | yes                    |                             |                           |
| B104      | FBHG2QE06DQBLA     | CACGAGCTTTAGACAGGGGA     | CTGTGCAGGGTGAATGCTG      | 223                           | 185                               | 0.95                                  | 2                       | yes                    |                             |                           |
| B105      | FBHG2QE09FSDM3     | ACCTAAGAGCTGTTGGTTCG     | TGAATCTGCTCAAAGACTACG    | 221                           | 178                               | 0.97                                  | 1                       | yes                    | 9                           | 74,552,276                |
| B106      | FBHG2QE16JUE6S     | GCTCCAGGTAGGCCCTTCACT    | TCCTGAGGCCAGAGTAAAA      | 233                           | 193                               | 0.94                                  | 1                       | yes                    | 64                          | 2,463,063                 |
| B107      | FBHG2QE09FVL3O     | TCAACATTTGTCAACATCCCA    | CCTCACTCAGCCCTGAA        | 208                           | 169                               | 0.91                                  | 2                       | yes                    | 17                          | 27,878,148                |
| B108      | FBHG2QE06DGS5W     | CCTGATTTCTCTGTITGGAA     | GGCCATCAATCAGCTTCAG      | 235                           | 194                               | 0.97                                  | 2                       | yes                    |                             |                           |
| B109      | FBHG2QE06DQ7N0     | CATCAGGAACAAGCCAAAGG     | CCCCAGGCCATATGTGATAC     | 234                           | 194                               | 0.88                                  | 1                       | yes                    | 10                          | 49,857,693                |
| B110      | FBHG2QE07ECR9G     | GGATGAAAAAATTCAGCCACC    | GTGTAGGTCCTGTCACTCC      | 227                           | 188                               | 1.00                                  | 1                       | yes                    | 5                           | 95,301,740                |
| B111      | FAGAMMR16JZQNT     | CTCCTTCTGTCACATTCGA      | AGGGACAGGAATTAAGGGGA     | 231                           | 191                               | 0.99                                  | 1                       | yes                    | 27                          | 12,707,099                |
| B112      | FBHG2QE16J1QTV     | CCCAGACCTGTGATGAAAGAA    | TTATTCCTGAAATGGGGCT      | 231                           | 190                               | 0.91                                  | 2                       | yes                    | 1                           | 17,440,473                |
| B113      | FBUJGPD12HMUFW     | GGAGGGAGATTCACAAATCA     | CAAGGCCCTTATATGAGTCAA    | 249                           | 206                               | 0.98                                  | 1                       | yes                    | 1                           |                           |
| B114      | FBHG2QE14IKKAG     | CTTTACCTGGGCTGATCCAA     | TTCAAGTCACTATCAACCCA     | 207                           | 166                               | 0.91                                  | 1                       | yes                    | 1                           | 50,767,865                |
| B115      | FBUJGPD13H3H2E     | TTTGTGTCAATCTGCTATTTC    | TACTGACCGCTGAAACAGG      | 201                           | 157                               | 0.93                                  | 1                       | yes                    |                             |                           |
| B116      | FBHG2QE06DNXY7     | AGTCACTACCCCTGCTGCT      | CCTCTCAACCCATGCTGTT      | 220                           | 180                               | 0.96                                  | 1                       | yes                    | 19                          | 7,098,600                 |
| B117      | FBHG2QE09FRUFI     | TTCTAAGGAGCATTCTGGCTG    | TTTAAAGTGTAAAAAGCAAGACG  | 237                           | 191                               | 0.93                                  | 0                       | yes                    |                             |                           |
| B118      | FBHG2QE10GE4QZ     | TGTTCTCTTGGCTTGTGAGA     | TTCAACAATAATCCCTTCCC     | 226                           | 186                               | 0.96                                  | 1                       | yes                    |                             |                           |
| B119      | FBHG2QE11GR20R     | CCAAGTGCACATGAGCAAAC     | CAGCTAGGTTGTTTCCAA       | 230                           | 190                               | 0.96                                  | 1                       | yes                    |                             |                           |
| B120      | FBUJGPD10F7MV4     | GGGTCAAGGCTCCTCACTCTT    | TGAAGAAGGAACACAGCAA      | 232                           | 192                               | 0.96                                  | 1                       | yes                    | 4                           | 47,945,658                |
| B121      | FBHG2QE06DTL01     | CAGAACAATCCAAAGGGCAT     | CCGGGCTGAACCTTTGTT       | 211                           | 173                               | 0.96                                  | 0                       | yes                    | 12                          | 32,920,038                |
| B122      | FBHG2QE13H8P08     | ATAACCTTTGCCAGACTCG      | GTGGTCAAGTGGAAAGGGAA     | 221                           | 181                               | 0.96                                  | 0                       | yes                    | 9                           | 74,542,366                |
| B123      | FBUJGPD12HB5AH     | CAGGTGTCTGGAAGGAGGG      | GGCAGAGATGTCAGTTC        | 216                           | 177                               | 0.91                                  | 0                       | yes                    |                             |                           |
| B124      | FBHG2QE13HX17R     | CACCTTTGTCCGAGGAG        | CCGTGATTTTCCGCTXTTA      | 225                           | 187                               | 0.98                                  | 0                       | yes                    |                             |                           |
| B125      | FBHG2QE08ERFJ9     | GGAGGAAAACCTGTAGTCTG     | GACTCCTTCTAAGCTCCA       | 248                           | 206                               | 0.95                                  | 1                       | yes                    |                             |                           |
| B126      | FBHG2QE08EY9HT     | GTGGAGCTGGCTCACTAGC      | TTTGCAAGTGGCCAGAAAAT     | 203                           | 163                               | 0.95                                  | 1                       | yes                    | 13                          | 36,001,336                |
| B127      | FBHG2QE07EA6ID     | AAATTTTGCTGTGCTCCAGC     | TAAAGGCCACTTCAGAAAC      | 242                           | 202                               | 0.92                                  | 2                       | yes                    |                             |                           |
| B128      | FBUJGPD15I63MK     | TTCCAGGACTCCAGGGCC       | GTCTTTGCCATGATAAGCATCTT  | 209                           | 167                               | 0.92                                  | 2                       | yes                    |                             |                           |
| B129      | FBHG2QE13H3JXD     | CTACAGGCCCGGCAAAC        | ATGTGGCTGCATCCAATAG      | 218                           | 180                               | 0.87                                  | 1                       | yes                    |                             |                           |
| B130      | FBHG2QE07D8BBZ     | CGGTACTTAATGGTTTACAATACA | CCGTGGATATCCCATTTGTC     | 213                           | 168                               | 0.96                                  | 1                       | yes                    | 117                         | 1,875,586                 |
| B131      | FBHG2QE16JVU2K     | CTCAAGTCTAGTGGAGGCCA     | GCTCAGTAGCATAACATGGCT    | 212                           | 170                               | 0.93                                  | 1                       | yes                    |                             |                           |
| B132      | FBUJGPD10GBS7      | TAGCGCTAGAAGAAGCCCG      | TGTTACATGAGTGATCGAGTTAAA | 213                           | 168                               | 0.99                                  | 1                       | yes                    |                             |                           |
| B133      | FAGAMMR16JUSZ4     | GGCTTAGAAAAGGCCCTCAG     | TGCATAAATTTACTGGCCAA     | 220                           | 179                               | 0.98                                  | 2                       | yes                    |                             |                           |
| B134      | FBHG2QE06DPANW     | TTGGACAGTATCTCGTGTGA     | GGGAAGTCCACAACCTATCTG    | 226                           | 184                               | 0.98                                  | 0                       | yes                    |                             |                           |
| B135      | FBUJGPD14IT09Z     | TAATTTGGCTGGCTAAAAG      | TCCTGTGATGTGCCCTACA      | 219                           | 179                               | 0.95                                  | 0                       | yes                    | 22                          | 30,306,397                |
| B136      | FBHG2QE06DPQ7U     | TGCAGACAGACTATGGGCAC     | TTGGCAGATTTGCACTGTT      | 208                           | 168                               | 0.98                                  | 1                       | yes                    |                             |                           |
| B137      | FBUJGPD16JQ2KC     | AGTTCCTAACACACAGGGGG     | TGGCAATGCTTACTGAGGA      | 215                           | 174                               | 0.98                                  | 2                       | yes                    | 121                         | 1,727,613                 |
| B138      | FBHG2QE07D5K9N     | GAGGAACTGGACAAGTCAAGC    | AGCAATCAGAGGCCAAAAC      | 230                           | 189                               | 0.89                                  | 2                       | yes                    |                             |                           |
| B139      | FBUJGPD16JSZ0Z     | TCGGAGATCAGCAGCAAAAC     | GTCTAGGCTGAGCCAAAAT      | 216                           | 176                               | 1.00                                  | 2                       | yes                    | 5                           | 32,465,128                |
| B140      | FBHG2QE12HJC1A     | TCTTTTAAAGGCCACGCAGT     | GCCTTAGCTGATCCCTTCA      | 213                           | 173                               | 0.99                                  | 0                       | yes                    | 13                          | 51,371,453                |
| B141      | FBUJGPD16JZ2UT     | TCTAATCAGGAAGGAGGAGGG    | TGTCACAGAATGAGGACCCA     | 190                           | 149                               | 0.95                                  | 1                       | yes                    |                             |                           |
| B142      | FBHG2QE13H9BA4     | CTGCATAATTTGGACAGCC      | AACGCAATTAACAGCTTGC      | 240                           | 200                               | 0.96                                  | 1                       | yes                    |                             |                           |
| B143      | FBHG2QE15I6EUU     | GGGAGCCCAACAAATTATG      | GAAATTTGATCAGATGTGCAA    | 207                           | 169                               | 0.95                                  | 1                       | yes                    | 5                           | 16,516,502                |
| B144      | FBHG2QE16JT4ZQ     | GAAGCTGTTCAAGACCAGG      | GGGCACTAGCACCTTTGAGT     | 225                           | 185                               | 0.94                                  | 2                       | yes                    |                             |                           |
| B145      | FBHG2QE08EYAEJ     | TGCTGTGACTTCCAAAAGTG     | CATGAACATCAGGACGGCTA     | 217                           | 177                               | 0.97                                  | 2                       | yes                    |                             |                           |
| B146      | FBHG2QE08EQ74W     | TCGCTTGTGCTGAAAGTGAAGA   | TGCAACCCATTTGTTGATT      | 234                           | 194                               | 0.93                                  | 0                       | yes                    |                             |                           |
| B147      | FBHG2QE14IPW59     | CCTTTGAAATTTGGTGTGG      | TTCTCTTTTCTGCTGACCC      | 216                           | 176                               | 0.96                                  | 0                       | yes                    |                             |                           |
| B148      | FBUJGPD14IPVHA     | CACCTGGAATCTTGTGGCTTG    | TCAAACTTCCPCCACTT        | 212                           | 172                               | 0.88                                  | 2                       | yes                    |                             |                           |
| B149      | FBUJGPD14I06H1     | AGTAGGCTGACAGGGCAGAT     | AACTGTTTCACTGTCCAGAGG    | 227                           | 187                               | 0.91                                  | 2                       | yes                    |                             |                           |
| B150      | FAGAMMR16JV03I     | CCCTCAGCTGGGTAACCTC      | ATTGTCAAGCTGGTGCAG       | 216                           | 176                               | 0.96                                  | 2                       | yes                    |                             |                           |
| B151      | FBHG2QE12HME5J     | CATACAGGACCAAATCCCT      | GTCTGTGAACTGGCTGCT       | 231                           | 191                               | 0.90                                  | 0                       | yes                    |                             |                           |
| B152      | FBHG2QE09FND0V     | TGATGCTCTACCATAGCACTTCA  | CCAATGGCTGAACCTTTGGG     | 217                           | 172                               | 0.95                                  | 1                       | yes                    | 6                           | 53,782,150                |
| B153      | FBHG2QE10F52CK     | CACCTCCCTTCACTTCC        | GGCCTCAGCAGGCTTATCT      | 213                           | 173                               | 0.96                                  | 2                       | yes                    |                             |                           |
| B154      | FBUJGPD13H1JEF     | GGCTTCAATTTTCTCCAG       | TTTCTGAGTGGGATATTGA      | 224                           | 182                               | 0.97                                  | 2                       | yes                    | 64                          | 5,960,942                 |
| B155      | FBHG2QE15I9JM5     | CCCGCTTCCCTTATAAT        | CCAGGATCAGAATGCAATGA     | 213                           | 174                               | 0.99                                  | 0                       | yes                    |                             |                           |
| B156      | FAGAMMR16JV2WU     | TCAACTTAGCTTCCAGGGCT     | AGGGGTGTCCAAGGGAGAT      | 206                           | 167                               | 0.97                                  | 1                       | yes                    | 47                          | 16,627,053                |
| B157      | FBHG2QE12HI088     | GTTCTAGGGAGGAAAAATTG     | GGGCATCAGAGCTGAAACAT     | 226                           | 186                               | 0.98                                  | 2                       | yes                    | 63                          | 9,693,741                 |
| B158      | FBHG2QE08EZHEP     | CCATGTTAGCCGGTGTAG       | CTTGTTTTGAAGAAAGTTGACA   | 226                           | 182                               | 0.96                                  | 0                       | yes                    | 18                          | 21,157,709                |
| B159      | FBHG2QE12HF0FW     | CCTTCTTCAAGAAAGTGA       | CTCTCTCTGACCCAGATG       | 234                           | 193                               | 0.97                                  | 0                       | yes                    | 45                          | 18,085,112                |
| B160      | FBHG2QE11GZUFX     | TAAACAAAAGGTTGTGGCT      | TAACTAAGGCTGAATGGCCG     | 214                           | 174                               | 0.96                                  | 0                       | yes                    |                             |                           |
| B161      | FBHG2QE16J13WZ     | CTCAAGTGGTGTATGGCC       | CTGGACGGTCTGTCAAGATA     | 237                           | 197                               | 1.00                                  | 1                       | yes                    |                             |                           |
| B162      | FBHG2QE13HZKRS     | TCAAGACGTGGCTTAGTCA      | AAGGGAACTGAGCAACAGA      | 248                           | 208                               | 0.98                                  | 2                       | yes                    |                             |                           |
| B163      | FBHG2QE08EQTPH     | AAGACTGTCAACTGCAAAAGG    | GACACATTTTGAGTTCCC       | 226                           | 185                               | 0.99                                  | 0                       | yes                    | 33                          | 21,481,153                |
| B164      | FBHG2QE16JUNV8     | AAAATTTCCCAACAGCCAGC     | CGATACAAGTTAGCGCTC       | 214                           | 174                               | 0.97                                  | 0                       | yes                    |                             |                           |
| B165      | FBHG2QE09FLS0H     | AGGCTGTGTCAATCTTTC       | TCGGAAATCCAGGAACTACC     | 212                           | 172                               | 0.96                                  | 1                       | yes                    |                             |                           |
| B166      | FBHG2QE09FRK7H     | TGCTGTAAAGGACTTCTGG      | CCACACAAGGACAGCAGAGC     | 195                           | 155                               | 0.98                                  | 1                       | yes                    | 29                          | 31,534,560                |
| B167      | FBHG2QE14ISS79     | TGAAACAAGTTAAGGCTCAC     | GCTGTACAACCTTCTGGGG      | 227                           | 186                               | 0.96                                  | 1                       | yes                    | 65                          | 11,353,589                |
| B168      | FBHG2QE13HXK49     | CACCTCAGTGAAGCTGTCA      | TTGCTCCTCTTTTCTTAGC      | 211                           | 169                               | 0.99                                  | 2                       | yes                    |                             |                           |
| B169      | FBHG2QE10F65PN     | TGTTTTGGGATTTGCCTTTT     | TGGGAAACCTTTATGGAGCA     | 240                           | 200                               | 0.97                                  | 1                       | yes                    | 6                           | 54,694,957                |
| B170      | FBHG2QE16JZVQN     | AAGTCAAGGGGACCACTC       | AGAAGATTTGGCCAAAACCA     | 187                           | 147                               | 0.96                                  | 1                       | yes                    | 67                          | 5,778,372                 |
| B171      | FBHG2QE11GRHMU     | CATCTGCTACCCTAAGCCCA     | GCAAGGTGCATAGGATGTGA     | 210                           | 170                               | 0.98                                  | 1                       | yes                    | 1                           | 101,862,519               |
| B172      | FBUJGPD14IUNDT     | AAACCAGTCTCAGAAAGGGA     | GAGAATTCACGATAGCGAGC     | 219                           | 177                               | 0.97                                  | 1                       | yes                    | 18                          | 34,656                    |
| B173      | FBHG2QE10F601J     | GCATTTGGGCTTTGGTTTTA     | TATCAGGAAATCCAGGCTT      | 242                           | 202                               | 0.98                                  | 0                       | yes                    |                             |                           |
| B174      | FBUJGPD10F6USF     | TGTTGGCAGCTGGTAAAGA      | TCTGTTGTTGGCTTATGTGA     | 224                           | 181                               | 1.00                                  | 0                       | yes                    | 50                          | 9,445,613                 |
| B175      | FBHG2QE15JGYUA     | ATGAAGTGTGGAGGGATGG      | CACCTAGCCTTTTGGGCTA      | 216                           | 176                               | 0.99                                  | 0                       | yes                    | 3                           | 78,448,534                |
| B176      | FBUJGPD10GGSAK     | TTGTGAATTCAGAGGCAAC      | TTCCAAGTCAAGGATAGGAAAGT  | 235                           | 191                               | 0.96                                  | 0                       | yes                    | 19                          | 35,050,101                |
| B177      | FBHG2QE14IUSWE     | TCTGCTGCTGTCTGCAAT       | TAACAATCTCCCTCTGCC       | 223                           | 183                               | 0.96                                  | 1                       | yes                    |                             |                           |
| B178      | FBHG2QE12HNAEL     | CAGGAAGGCCATGTCTGTG      | TCGAAATAGTGGCAAGCTGT     | 194                           | 154                               | 0.98                                  | 2                       | yes                    | 99                          | 715,849                   |
| B179      | FBUJGPD10F5PKB     | CCAGCTCTGGAACCATCTC      | CCACAGGCTGGCAAATATAGA    | 199                           | 178                               | 0.98                                  | 2                       | yes                    | 21                          | 15,471,258                |
| B180      | FBUJGPD10GB711     | TTATCTGGGAGAGTTTGGC      | AACCTTTGTCACAGGCTTC      | 218                           | 178                               | 0.97                                  | 2                       | yes                    | 58                          | 10,358,110                |
| B181      | FBHG2QE08ESODZ     | AGAGGCTTGTGCTTGCTAT      | GGTGGCTGTAGTAGTAGGAG     | 213                           | 173                               | 0.93                                  | 1                       | yes                    | 18                          | 11,408,461                |
| B182      | FBUJGPD15I845X     | GCAAGATAGGTTAGGGGCTTG    | CTGAGAGGACAGGGAGAAA      | 209                           | 168                               | 0.93                                  | 1                       | yes                    |                             |                           |
| B183      | FBUJGPD15JENB8     | ACAATGCCCTACTGAAAG       | GCCAAGCTCTTGTCTCTA       | 204                           | 164                               | 0.99                                  | 1                       | yes                    |                             |                           |
| B184      | FBHG2QE15I6HZ8     | TTTTCCCAAGTTGATGGGAG     | CCTTACCAGCTTGTCTCCA      | 232                           | 192                               | 0.95                                  | 2                       | yes                    | 37                          | 19,442,139                |
| B185      | FBUJGPD10F4FGQ     | TGGACAAGAAATGAGGAAGCA    | ATGTCCTTCCAGGGACTG       | 212                           | 169                               | 0.93                                  | 0                       | yes                    |                             |                           |
| B186      | FBHG2QE13H08E0     | TCCAGCTCACTATGAGGCA      | TGGAATGAATATCCCCCA       | 225                           | 185                               | 0.94                                  | 1                       | yes                    |                             |                           |





| target ID | read ID GenBank ID | F-Primer 5'-3'          | R-Primer 5'-3'           | product length in bp amplicon | product length in bp w/out primer | Mastodon-loxAfr1 alignment % identity | # of hits isPCR loxAfr1 | consensus for all taxa | aligned loxAfr3 scaffold ID | loxAfr3 scaffold position |
|-----------|--------------------|-------------------------|--------------------------|-------------------------------|-----------------------------------|---------------------------------------|-------------------------|------------------------|-----------------------------|---------------------------|
| B187      | FBHG2QE09FLVCG     | AGCTCCCAGATCAAACGAGA    | GGGGTTCATCCAGCCTCTAT     | 233                           | 193                               | 0.96                                  | 1                       | yes                    |                             |                           |
| B188      | FBHG2QE14IS2J2     | TCCACTTGAGGCATTGGAAGA   | TGAAAGTCCACAGCCCTCAG     | 232                           | 192                               | 0.99                                  | 1                       | yes                    | 8                           | 28,743,344                |
| B189      | FBHG2QE09FKAVU     | CCTGGACTGGCTACAGGCTA    | AACAGGTCAGCCCAAGA        | 199                           | 161                               | 0.99                                  | 2                       | yes                    | 64                          | 10,988,385                |
| B190      | FBUJGPD12HEBCW     | AGCCACTGAAGTGTGCCG      | GTCTGTCACTGGGAGGGTGT     | 208                           | 169                               | 0.96                                  | 2                       |                        |                             |                           |
| B191      | FBHG2QE07EDNG2     | AATTTCCAGGAGTTAATGGCTT  | TCTGTCTGTGTTAGTGTTCAGC   | 218                           | 173                               | 0.96                                  | 2                       | yes                    | 30                          | 7,557,074                 |
| B192      | FBHG2QE14IK2L7     | ATTGATCTCCATGACCACC     | GTCTGTGGGAAAGATTGGG      | 221                           | 181                               | 1.00                                  | 0                       | yes                    | 18                          | 30,278,164                |
| B193      | FBHG2QE10F6LX1     | AAGCGTGGTATGTGTGTGT     | ACCTAGATTTCTCGAGGGGA     | 215                           | 175                               | 0.94                                  | 0                       | yes                    | 27                          | 13,377,102                |
| B194      | FBUJGPD11G0IU9     | GCAGGTAAGAGAGCAGGCAG    | CCTCCATGATGCAATCTGATA    | 229                           | 188                               | 0.91                                  | 0                       | yes                    | 18                          | 40,691,157                |
| B195      | FBHG2QE14II3P2     | TCCTATTGGAACATCTTCTCT   | TGAACCTGAGGCTAGTITGG     | 212                           | 168                               | 1.00                                  | 1                       | yes                    | 12                          | 34,660,356                |
| B196      | FBUJGPD16JYHN2     | TCAGTGGCTTTGACTGTGTGG   | CCTGGCTCTTAACCTGCTTA     | 214                           | 172                               | 0.97                                  | 2                       | yes                    | 16                          | 24,765,073                |
| B197      | FBUJGPD14IKZ7Q     | AAACCACCTGCAACTATGG     | CTCATGCTCTGAAACCTT       | 204                           | 165                               | 0.95                                  | 1                       | yes                    | 3                           | 9,545,026                 |
| B198      | FBHG2QE07EE7F1     | TGTGTGTCTGACCACCCATAG   | ATTAAGGAGACAGGACGGCA     | 193                           | 152                               | 0.99                                  | 1                       | yes                    | 28                          | 12,702,582                |
| B199      | FBHG2QE06DMMPO     | TGGTACCCTTTGACCTCGG     | GGACAATGTGGATTGAGGGAG    | 210                           | 170                               | 0.98                                  | 1                       |                        |                             |                           |
| B200      | FBUJGPD14IKWYZ     | CCAGGAGCTGGTATCTGTC     | GACACTCAAGGTGGACAGGC     | 218                           | 178                               | 0.97                                  | 1                       | yes                    | 29                          | 26,771,641                |
| B201      | FBHG2QE16JWNC8     | CAATTTGGTGGCAGATTTGA    | GGCCTAGGACACCAACCTAG     | 216                           | 176                               | 0.98                                  | 0                       |                        |                             |                           |
| B202      | FBUJGPD13HW1Y2     | GCAGGAGTAAAGCAGCAGT     | ACCAAAAACCAACCCAGTG      | 212                           | 172                               | 0.95                                  | 0                       |                        |                             |                           |
| B203      | FBHG2QE06DIG65     | GGGACTCCACAGAAATGT      | TGGCACTGTGAGGAAGAGA      | 209                           | 169                               | 0.98                                  | 1                       | yes                    | 122                         | 2,400,993                 |
| B204      | FBHG2QE11G0GDB     | TTGGCAGAAATGGAAGCCT     | AGTGGCTACGTGGACTCAGG     | 213                           | 173                               | 0.99                                  | 1                       |                        |                             |                           |
| B205      | FAGAMMR16J3WD      | AAACCCGCAATTTGGTGAAC    | GAGTATCCCATGACTGCTT      | 211                           | 171                               | 0.98                                  | 0                       | yes                    | 3                           | 30,984,529                |
| B206      | FBHG2QE15J5B3B     | TTAATGTACCTGCAACCCCT    | CTCAGCTGGAGGACCAAGGT     | 209                           | 169                               | 0.96                                  | 0                       |                        |                             |                           |
| B207      | FBUJGPD13H9U0T     | ACAAGTTCCTGATCTCCCA     | CTGGCACTCATGCTCTCT       | 226                           | 188                               | 0.92                                  | 1                       | yes                    | 319                         | 48,206                    |
| B208      | FBHG2QE08EP2Y4     | TTCAAAGTCTGCACTATCTTC   | GCACATTAACAGTCTTGGATGC   | 192                           | 147                               | 0.92                                  | 1                       |                        |                             |                           |
| B209      | FBHG2QE12HGN7U     | TCAGCAGATCTCCAGTGTGG    | AGCCAACAACCTGAGAGGG      | 205                           | 165                               | 0.95                                  | 2                       | yes                    | 42                          | 9,116,261                 |
| B210      | FBHG2QE13H5MMY     | GCTTCTTCCACTTCTGGG      | TGTGGTCAATATGCCCTCACA    | 229                           | 188                               | 0.99                                  | 2                       | yes                    |                             |                           |
| B211      | FBUJGPD12HJ3JY     | CCCAGCAAGAAAGGCTTTTA    | GGGATTAATCTGGAGTCAAA     | 241                           | 201                               | 0.99                                  | 1                       | yes                    |                             |                           |
| B212      | FBHG2QE10GCB5E     | GTGGCAACTGTTCACTGTC     | CATCCTTCCCAACAGTCTGC     | 218                           | 178                               | 0.96                                  | 1                       | yes                    | 14                          | 47,737,118                |
| B213      | FBUJGPD13H01SL     | TTCTTTCACTGGATCTGTGG    | TTACTTGGATGACAAAGGGG     | 221                           | 180                               | 1.00                                  | 2                       | yes                    |                             |                           |
| B214      | FBUJGPD13H2RBJ     | ACTTCCCCTCACTCCCTTCC    | TCACATGAGGTAAAAATGGCA    | 237                           | 195                               | 0.96                                  | 2                       | yes                    | 36                          | 21,174,749                |
| B215      | FBHG2QE12HM20S     | CCTGTACTGAGTCCCAAGGC    | CTTCACTCCACTCTCAGCA      | 196                           | 155                               | 0.96                                  | 1                       | yes                    | 127                         | 820,250                   |
| B216      | FBHG2QE09FMQNN     | GTCCACAAAGTGCAAGACC     | GCATTGAGGCGAGGCTAAA      | 191                           | 151                               | 0.96                                  | 1                       |                        |                             |                           |
| B217      | FBHG2QE15JE7E6     | TATTTTGAAGGGAGGAGGGG    | TCAGCGCACTTAGCTGTTC      | 216                           | 176                               | 0.99                                  | 0                       | yes                    | 65                          | 11,061,277                |
| B218      | FBHG2QE08EV9NS     | TTGTGTTCTATGTGGAAGTG    | TCTCTCCAATCTGATGCTG      | 199                           | 159                               | 0.90                                  | 0                       |                        |                             |                           |
| B219      | FBHG2QE13H4M8U     | CCTGGGCGAGCTCCAGCTT     | GGGTGGGGAAGACGCTT        | 207                           | 169                               | 1.00                                  | 1                       | yes                    | 6                           | 93,344,124                |
| B220      | FBHG2QE10F8IHA     | TGTCATGAAAGGATGAGTGAGC  | TTTGTGTGTAACCTGCAATACT   | 205                           | 159                               | 0.95                                  | 1                       | yes                    | 22                          | 10,273,074                |
| B221      | FBHG2QE11G1LGC     | CGTGTCTATCCAAGCTCCC     | GTGGGACCATGAGAAGCAGT     | 225                           | 185                               | 0.94                                  | 1                       | yes                    | 72                          | 7,687,676                 |
| B222      | FBHG2QE06DNX08     | GACAACTGCATTCTGACTTGC   | GACCATGTCTAGGGCTCTG      | 224                           | 182                               | 0.95                                  | 1                       | yes                    | 28                          | 3,604,923                 |
| B223      | FBHG2QE11GTYCW     | GATTAGCTGAGGAGGAGGAGA   | GGCACAATTTGGAGGATGT      | 197                           | 147                               | 0.99                                  | 2                       | yes                    |                             |                           |
| B224      | FBUJGPD15I75TP     | CCATCTTGGACTCACCAGAA    | TGCAGCGTGTCCCTTAAGTA     | 237                           | 196                               | 0.95                                  | 2                       |                        |                             |                           |
| B225      | FBHG2QE10GAJZB     | GAGTGATGAAAGCTGCCCT     | TGGTGCATTTCTGTGTTC       | 207                           | 167                               | 0.98                                  | 2                       |                        |                             |                           |
| B226      | FBUJGPD14IMZ37     | TTCAACAATAAGATGCAATGCTG | TCGATGTACCCGTGAAAGC      | 220                           | 178                               | 0.99                                  | 0                       | yes                    | 102                         | 4,393,297                 |
| B227      | FBUJGPD11GXMS7     | TACGGCACACTTGTCTCT      | AAAGAAAACAAAATCTCACAA    | 225                           | 182                               | 0.93                                  | 0                       |                        |                             |                           |
| B228      | FAGAMMR16JU81N     | TTGCTGTTGCACTTACCAG     | AAAAGGAATGGTGGACTG       | 236                           | 197                               | 0.98                                  | 1                       |                        |                             |                           |
| B229      | FBHG2QE10GEREW     | TCTGGGCGAGCTCTGATTT     | AACGTTCTTGGAAATCTGACA    | 211                           | 170                               | 0.93                                  | 1                       | yes                    | 507                         | 66,245                    |
| B230      | FAGAMMR16JZF2Q     | TGGTGGTTCACAGCTGGG      | GTCTGGGCACTTAGCTGGT      | 233                           | 165                               | 0.96                                  | 1                       | yes                    | 71                          | 941,543                   |
| B231      | FBHG2QE14ISADM     | GAAGGCTTCTCTCCCTGTC     | GGCCTGACCACTCTTATC       | 233                           | 193                               | 0.95                                  | 1                       |                        |                             |                           |
| B232      | FBHG2QE06DH180     | GCATGACGTGGGAGGTGAT     | CCAGCAGCACTCACTCAG       | 226                           | 187                               | 0.95                                  | 1                       |                        |                             |                           |
| B233      | FBHG2QE12HK8W8     | CGCTGGTAACTGAGAGTCA     | CCTGAAGCGCTTCTCTG        | 242                           | 203                               | 0.99                                  | 1                       | yes                    |                             |                           |
| B234      | FBHG2QE06DHUJT     | TCTAGCCTGCGACTCACAC     | GCACCAGGTAGACCAGAGA      | 150                           | 110                               | 0.93                                  | 1                       | yes                    | 9                           | 83,036,813                |
| B235      | FBUJGPD15JG9ZV     | GGCCCTTCCCTAATCAAG      | AGTGACATCAGATTTGGTCTC    | 206                           | 164                               | 0.93                                  | 1                       |                        |                             |                           |
| B236      | FBUJGPD12HDZ32     | GGAATGTGGAAAGCAGAGC     | GGACTGCAATTTCTGGCT       | 192                           | 152                               | 0.96                                  | 2                       | yes                    | 9                           | 40,645,422                |
| B237      | FBUJGPD14IMZAP     | TTTCACTGTGTGAGAAGATCAGA | GCATCTGACATCTAGCTCCTT    | 224                           | 180                               | 0.96                                  | 2                       | yes                    | 50                          | 5,580,361                 |
| B238      | FBHG2QE15JDH47     | ATTTCAAATGGCATCGGTAG    | GAAGTTCCTGCTAGACCCC      | 204                           | 164                               | 0.99                                  | 2                       |                        |                             |                           |
| B239      | FBUJGPD10F88N4     | TGGATGAAAGCAAGAAAGAGA   | GATTCTGACTATGTATCGGAG    | 227                           | 182                               | 0.98                                  | 2                       |                        |                             |                           |
| B240      | FBHG2QE07D7KLN     | TTCTGTACCACCTTGACACA    | TGATAGTCTGTCTCACCACA     | 216                           | 174                               | 0.98                                  | 0                       | yes                    | 151                         | 80,293                    |
| B241      | FBHG2QE10F3Y9Z     | CTGGGACTTCTCTCTGGG      | GCAATTCAAGGAGAAAGCA      | 210                           | 172                               | 0.91                                  | 1                       | yes                    |                             |                           |
| B242      | FBHG2QE10GA3BL     | CCGTGCCAATTTTACAAGGA    | TCGAAAGCTAAGCCGAAATG     | 244                           | 204                               | 0.93                                  | 1                       | yes                    | 127                         | 1,455,825                 |
| B243      | FBHG2QE14IVSUR     | GTGTGCCAGTCCATGCTA      | TAGTAGCTGGCTGCTCTG       | 204                           | 164                               | 0.95                                  | 1                       | yes                    | 5                           | 94,097,177                |
| B244      | FBHG2QE13H1STR     | CACCAAGAACCTCACTATTCA   | AACCTTACTAGGCGCTGCT      | 212                           | 170                               | 0.96                                  | 1                       | yes                    | 129                         | 1,478,153                 |
| B245      | FBUJGPD10F35ZZ     | TGCTTCAGCACTTCTTGTG     | AAGCCATCTGGTTCCTTT       | 201                           | 161                               | 0.96                                  | 1                       | yes                    | 49                          | 296,180                   |
| B246      | FBHG2QE08ET8Z0     | ACACACTGCTCAAGCTCCT     | CGGGTCAAGCTCAGAG         | 200                           | 161                               | 0.99                                  | 1                       | yes                    | 27                          | 367,552                   |
| B247      | FBUJGPD13HWCT3     | CCCAGTCTGGCAAAAATACC    | CTCCCAATAGGAAGCTCTCA     | 197                           | 157                               | 0.99                                  | 2                       | yes                    | 8                           | 39,229,258                |
| B248      | FBUJGPD10F7U4S     | TGCTCCCTGATGTGTGTG      | AGCCTGGTAAAGGAGAGGG      | 223                           | 183                               | 0.99                                  | 2                       | yes                    | 11                          | 49,000,000                |
| B249      | FBHG2QE16JHCHY     | GGTAAACAGCTTTTCTCTCT    | GAAAAAGTGGGAGGAAGCTG     | 231                           | 189                               | 0.99                                  | 2                       |                        |                             |                           |
| B250      | FBHG2QE08EWP1T     | CAGGGGTACAGTTTCACTGATG  | TGTGAGAAAGCAATGTGAGGCA   | 199                           | 154                               | 0.98                                  | 2                       | yes                    | 11                          | 27,980,216                |
| B251      | FBHG2QE09FK0SU     | TGGGTGAACGAACAGTTTCA    | CCATGATTTATGCTCTCTCT     | 191                           | 150                               | 0.98                                  | 0                       | yes                    | 47                          | 12,040,065                |
| B252      | FBUJGPD12HMH24     | AATACCATGGCTGGGTGAG     | CCGGAACAATAAGCAACATC     | 220                           | 180                               | 0.94                                  | 0                       |                        |                             |                           |
| B253      | FBHG2QE09FI2XG     | CCGTCTGCTCCATCATT       | TGAGGGCTCTCAACCTTT       | 230                           | 191                               | 0.97                                  | 0                       | yes                    | 3                           | 10,675,793                |
| B254      | FBHG2QE11GTJ16     | GCATGACCTCACTGTTTACC    | AGCCATCGTCTGAGACATTT     | 206                           | 165                               | 0.94                                  | 0                       |                        |                             |                           |
| B255      | FBUJGPD11GVQJ3     | TAGGGGACTGATCCACAGC     | GGTTTGGAAAGTGGAAAGCA     | 189                           | 149                               | 0.89                                  | 1                       |                        |                             |                           |
| B256      | FBHG2QE06DQMJ2     | GGGACGGGTGATGAGTAATG    | CAGGGCAATTTAAAAAGCA      | 196                           | 156                               | 0.96                                  | 1                       | yes                    | 86                          | 3,693,404                 |
| B257      | FBHG2QE10F6PFZ     | TCAAGAGTTTGTACCAAGGG    | ATAGGGCTTTTGCAGAGGGT     | 224                           | 182                               | 0.97                                  | 1                       |                        |                             |                           |
| B258      | FBUJGPD11GU0Q6     | AGACATCAGCCGTAAGCTGG    | TCAGACCTCACTGTGCAAGAA    | 233                           | 192                               | 0.98                                  | 1                       |                        |                             |                           |
| B259      | FAGAMMR16J1N29     | CCCCACCTACTGATTTAT      | TTGAGTGTATCTGACTCGTAGTG  | 199                           | 154                               | 0.87                                  | 1                       | yes                    | 99                          | 1,861,855                 |
| B260      | FBUJGPD12HD8EE     | TCTGGCAGTCTCTGAAAGC     | CAGCAAGCAAGTCTTGTGA      | 215                           | 175                               | 0.88                                  | 1                       | yes                    | 20                          | 10,655,556                |
| B261      | FBHG2QE07D6R67     | TTCTCTGCGTCTTTTCTCA     | TCCAGAGGTGGGCTCATAG      | 237                           | 196                               | 0.98                                  | 1                       | yes                    | 1                           | 5,314,690                 |
| B262      | FBUJGPD15JGOXJ     | CTAGATGCAAAATCGGGAG     | CTCTCGGGTGGCTGAAAC       | 238                           | 199                               | 0.93                                  | 1                       | yes                    |                             |                           |
| B263      | FBHG2QE13H4KT3     | TTTTCCGACTCATAGTGAACCT  | AAGGATGGGCACTTCATC       | 238                           | 197                               | 0.91                                  | 1                       |                        |                             |                           |
| B264      | FBHG2QE12HEUHS     | CCTTCTCCATCCAGGACAC     | TGGAGGAACCTTTGTCAAC      | 155                           | 115                               | 0.96                                  | 2                       | yes                    | 21                          | 4,340,823                 |
| B265      | FAGAMMR16J56GX     | TTTTATAAAGGGGAGGTGGC    | CACTCTCCATCCCTGAAGA      | 197                           | 157                               | 0.98                                  | 2                       | yes                    | 63                          | 10,535,568                |
| B266      | FBUJGPD10GFGEX     | CATATTTTGGGTTCAAGGAA    | GCACAGGCTGAACTGTCTAT     | 195                           | 154                               | 0.99                                  | 2                       |                        |                             |                           |
| B267      | FAGAMMR16JFND      | CTCCAGCTCACTCACTCAT     | AGAGGGGCTTATGAGACT       | 215                           | 175                               | 0.95                                  | 0                       | yes                    |                             |                           |
| B268      | FBHG2QE09FMKKE     | TGCCCAAGTCAATCTCTGA     | CATAATGAAATGGGAGCCCTG    | 201                           | 161                               | 0.99                                  | 0                       |                        |                             |                           |
| B269      | FBHG2QE09FVFT2     | CCTCACCACTCTCACTCT      | GCCAGTGTCTTTCGAGTIT      | 205                           | 165                               | 0.97                                  | 1                       | yes                    | 9                           | 45,296,098                |
| B270      | FBUJGPD15JEXC      | GCTCCTCACAGCAGACTT      | CCTGTCTGAAGCTAAGCTT      | 226                           | 186                               | 1.00                                  | 1                       |                        |                             |                           |
| B271      | FBHG2QE09FHSI6     | TGAGACCATGACTGCACTTG    | AAGTTCCTTCTGACTGAACTT    | 217                           | 174                               | 0.87                                  | 1                       | yes                    | 9                           | 31,042,083                |
| B272      | FBUJGPD11G1BQ0     | CTGCCAATGATTTGTAAAGA    | GGTTGCCAGTGGTAAATG       | 231                           | 189                               | 0.97                                  | 1                       |                        |                             |                           |
| B273      | FBHG2QE16JWZPH     | CATGGGCTCAAAAAGAAAGA    | GCAACCCCAACCCCTAAAGT     | 211                           | 171                               | 0.93                                  | 1                       | yes                    | 113                         | 2,459,782                 |
| B274      | FBHG2QE06DMSFL     | TTCATATGACCCTGAAGAACTTG | TCAGGGTAGTAACCAATAGGCTCA | 228                           | 182                               | 0.99                                  | 1                       |                        |                             |                           |
| B275      | FBHG2QE10GCMX19    | GAGAAGGAAGACGCAGATGG    | AGGTTCTCAGCATCGGTAAGC    | 219                           | 179                               | 0.98                                  | 1                       |                        |                             |                           |
| B276      | FBHG2QE13H66FP     | GGACTGGCTCTCTGTATA      | ACGCAAGCAGGATTTACAAC     | 229                           | 189                               | 1.00                                  | 2                       |                        |                             |                           |
| B277      | FBUJGPD15JAI0D     | TGCTGAAATAAAGACCCCTCA   | CCCTCCAGAGGAAATCGTAG     | 206                           | 165                               | 0.91                                  | 2                       | yes                    | 43                          | 11,627,841                |
| B278      | FBHG2QE13H2TW1     | GAAAGTTGGCCTTATTTTCTTCA | GAGCAAGGAGACTCCACAGG     | 220                           | 176                               | 0.94                                  | 2                       | yes                    | 16                          | 43,716,062                |
| B279      | FBUJGPD16JR8R      | AGGAAGGTTCTCCATGGGT     | AACAGTCACTGGGAAGGAT      | 186                           | 146                               | 0.98                                  | 2                       |                        |                             |                           |
| B280      | FBHG2QE07D5ZS6     | TGCAATTTGGTCCATGAGA     | GGTGGTGGATTCTAGGACA      | 228                           | 189                               | 0.99                                  | 2                       |                        |                             |                           |
| B281      | FBHG2QE09FIDOD     | AGGTCTGCCAACCTAGGGAC    | ACAGTTGAGCTCAGGCATC      | 225                           | 185                               | 0.98                                  | 1                       | yes                    |                             |                           |
| B282      | FBHG2QE10F9I2L     | CAAAGCATAGACGAGCCAT     | CAGAGATGACTCCCGTTGG      | 232                           | 192                               | 0.89                                  | 1                       |                        |                             |                           |



| target ID | read ID GenBank SRA010805 | F-Primer 5'-3'          | R-Primer 5'-3'         | product length in bp amplicon | product length in bp w/out primer | Mastodon-loxAfr1 alignment % identity | # of hits isPCR loxAfr1 | consensus for all taxa | aligned loxAfr3 scaffold ID | loxAfr3 scaffold position |
|-----------|---------------------------|-------------------------|------------------------|-------------------------------|-----------------------------------|---------------------------------------|-------------------------|------------------------|-----------------------------|---------------------------|
| B283      | FAGAMMR16JZKFE            | GTGGGGTTATTGGAAGGTT     | TGCCTGCTCAACAGAAGATG   | 214                           | 174                               | 0.95                                  | 1                       | yes                    | 25                          | 21,228,071                |
| B284      | FBHG2QE15I8O26            | ACTGGGTGGGCTCTAGGTTT    | TTTGATTTCCAGCCAGGAG    | 219                           | 179                               | 0.95                                  | 1                       | yes                    | 11                          | 55,035,949                |
| B285      | FBUJGPD11G0VYR            | CTGTTCCACAACCAAGCCTC    | AATGACATTCGATGGAAAAGAA | 194                           | 152                               | 0.95                                  | 1                       | yes                    | 64                          | 7,081,948                 |
| B286      | FBHG2QE07D9OIX            | TGGAACAGTTGACTGGGTTT    | TGTTGGCAATTATGGCAATG   | 195                           | 155                               | 0.99                                  | 1                       | yes                    | 9                           | 52,027,714                |
| B287      | FBUJGPD13H6T03            | ATGTTTGAAGTCCAGGCT      | TTACGTCCTATGGTTCCCC    | 217                           | 177                               | 0.93                                  | 1                       | yes                    |                             |                           |
| B288      | FBHG2QE15I88E1            | CATGGAGATGGTTCATAACACAC | TGTGAATTCGTTCCAACAAGA  | 215                           | 171                               | 0.94                                  | 1                       | yes                    |                             |                           |

A1-long

**Target and primer information used for sequencing error rate estimation using direct Sanger sequencing**, read ID corresponds to the read in the short read archive SRA010805, PCR product length with and without primers is given.

| target ID | read ID GenBank SRA010805 | F-Primer 5'-3'            | R-Primer 5'-3'            | product length in bp amplicon | product length in bp w/out primer |
|-----------|---------------------------|---------------------------|---------------------------|-------------------------------|-----------------------------------|
| A002      | EK3X9L102F3RBB            | GCCTTCTTCTGGCTGATGAT      | AGCTTTCTGGGCTTCTTTTC      | 746                           | 706                               |
| A004      | EK3X9L101DC8H2            | GAAGTGCCCGTTATACACCAA     | GCGAAAGCTGGACAATGAAT      | 749                           | 708                               |
| A005      | EK3X9L101BHMHV            | GCAGTGTTTCTCTCGATTTCC     | CTGAGCCAACAGGAGAGGTC      | 750                           | 710                               |
| A008      | EK3X9L101CV00E            | TTCCTTCTCTGCCTTCTCA       | GGACATCTACATCAGCTGGC      | 749                           | 709                               |
| A010      | EK3X9L101DQL4E            | ACGTGGACAGGTTCCGACATA     | GCAAACAGGTCATCCGAGTC      | 750                           | 710                               |
| A012      | EK3X9L101BCGQI            | CTGGTCTACAACACAGGATT      | TGAGTTGGACTTGACAGCCC      | 746                           | 705                               |
| A013      | EK3X9L102G5E9S            | ACTCAGCCAGGATTTGCAT       | CCTTTATCCCAGATGCTGACA     | 746                           | 705                               |
| A015      | EK3X9L102JWLAQ            | TTTGTGGATGTTTGCAGGTG      | TTGGTATCACGTGGGTATAGCTT   | 743                           | 699                               |
| A016      | EK3X9L101EN54P            | TGACAACAGAGTTACCCACACC    | TGCTGGGTAAATACAGTATGAGG   | 732                           | 687                               |
| A019      | EK3X9L101C0K93            | CATGCTCGTTGCTCTGCTC       | GCTAAAGGGCCATGCAATTT      | 749                           | 710                               |
| A020      | EK3X9L102F9G0Q            | ACTCAAATCTGTCTCAGAATGGC   | AATAGATTGCACCTGCCACC      | 737                           | 694                               |
| A021      | EK3X9L101CTJZY            | TGACGTCAGGAGTCTCTCCC      | ACCTGAAACACCCAATCAGG      | 749                           | 709                               |
| A022      | EK3X9L102H02GU            | ACACACACCTTCTCTGCACA      | CTCTGCCATTGGCTCAGTCT      | 748                           | 708                               |
| A023      | EK3X9L102GCTKJ            | CAAGAGGCAAGAGGTCAATAAA    | TCTGGCATTCCCTGCAAT        | 750                           | 708                               |
| A026      | EK3X9L102FFWKW            | AAACACACTCTTCCAAGCCC      | CAGGCAGTCTGTCTCCTTGG      | 748                           | 708                               |
| A028      | EK3X9L102IGAJD            | GCAGTGTTTCTCTCGATTTCC     | CTGAGCCAACAGGAGAGGTC      | 750                           | 710                               |
| A030      | EK3X9L102HH3QY            | ATAGTGGTCTGCTGCCTTT       | GTCTCGGGTCAACGAAGACA      | 750                           | 710                               |
| A032      | EK3X9L102G4ANS            | GAACGGAGATTGTCGGAGG       | CTTATTCTTGTCTGCCGGAC      | 748                           | 709                               |
| A034      | EK3X9L101AEV4R            | GGTCAGGGTTGAGTTGGCT       | GGAGGCAGATAGGAGAGGCT      | 742                           | 702                               |
| A035      | EK3X9L101A6LR5            | TGGACCAATGAGCGACATTA      | TCACACGACAATAAGAGCCC      | 748                           | 707                               |
| A036      | EK3X9L101AHAIX            | CATTGACAATCGTCTGAGCTTT    | TGTCGTCTTGTGGATTGAC       | 748                           | 706                               |
| A038      | EK3X9L102IMKVX            | ACCTATCTGGGAAATGCTCG      | AACAATTGTGAGGACGGCTC      | 740                           | 700                               |
| A039      | EK3X9L102IRFTU            | TCATCAATACAACCTGCCCT      | AAAGGCTCCGGTAAAGAGTC      | 750                           | 710                               |
| A040      | EK3X9L102JSOT0            | GGGTTGTAGGTAAGGGCCAC      | ATTCCCAGGTACAGGACAGC      | 750                           | 711                               |
| A041      | EK3X9L101AIALH            | ATGTGGGAAACATGCTATCG      | TTCCGACTACTGGGACAGCA      | 747                           | 707                               |
| A043      | EK3X9L102FIY9W            | ACCCAGCTTCTCTGAGCAA       | GGGTCTGCTGAGATTTCTTCC     | 748                           | 707                               |
| A044      | EK3X9L102GFDDD            | CTTGGAAACCTTATGGAGCA      | CAGCAGAGCTAAGGAAACC       | 750                           | 710                               |
| A048      | EK3X9L102GRG6Q            | TTAACATGCTTGGTCCCTGC      | AGGTCAGTCCCACAGTCCC       | 750                           | 711                               |
| A049      | EK3X9L102HZ5M7            | GCGAAGCATGGTTGATAGC       | ATATACCACGGACTGCCAGC      | 746                           | 706                               |
| A051      | EK3X9L101AX9UU            | TAGGGAGAGCCATTTGCTCT      | AAGCGCTAGAGCCAATGAGA      | 750                           | 710                               |
| A052      | EK3X9L102G8P4Z            | ACTTCCGGCAATAGAGCCTT      | GGAGGGCTGGGTTTCTCTTA      | 747                           | 707                               |
| A054      | EK3X9L101E21TS            | TCTGGGATCATCTCCCTCTG      | CGACTCGATGGCACTAGGTT      | 750                           | 710                               |
| A055      | EK3X9L102J0R29            | GAACCTTTACATAGATCAAGAGGCA | TGAAATCCTTGAAAACCTCAATCTT | 391                           | 341                               |
| A057      | EK3X9L101DC6HA            | CCTGGAGCATGAGAAACTGG      | AATGTGTGAATGGAACCGGAG     | 750                           | 709                               |
| A059      | EK3X9L101BDI18            | TGGAAGGAGCAGTCAAGAAA      | GCCATCAAGGAAATGCAAAAT     | 750                           | 710                               |
| A061      | EK3X9L102HQFHE            | TTTCTTTAGCCCTTTCTTT       | GGGTCTCAGATGAGTAAGGCA     | 750                           | 708                               |
| A062      | EK3X9L102JWO1R            | ATTTCAACTTCCAGTGCAGG      | TTGGTCTTCTCACTGATCC       | 750                           | 710                               |
| A063      | EK3X9L101BCKUW            | TTGGAAGAGCTCGCTTGT        | TTGCTTTCTTATGTTGAGGTG     | 750                           | 708                               |
| A064      | EK3X9L102HHRV7            | TTGTTCCAACGCCACTCAT       | ACTCTGGCATTGAAACAGCA      | 750                           | 710                               |
| A070      | EK3X9L101AG83P            | TGAACGCTAACACTGCATACG     | CAAAGAAGAGAGCGCACAGG      | 750                           | 709                               |
| A072      | EK3X9L102JM0Q8            | AGGGATTCTTCCAGAGGAGC      | CCTGCTTTGCTCAGAGGACT      | 750                           | 710                               |
| A075      | EK3X9L101DSVGO            | TGAGTGACACAGTAAATCACAA    | TCTTTGGCTGAAGGGTGAAC      | 750                           | 707                               |
| A078      | EK3X9L101C26GN            | GGAGTTGCACCTGGCTGATTT     | TGTGTGAAGCCTTCTTTGTG      | 746                           | 706                               |
| A079      | EK3X9L102H07QM            | ACTCAGAGTGGTCGGAGCTG      | ACTTACACCTTGGAGTGCC       | 746                           | 706                               |
| A081      | EK3X9L101DKF6W            | GGACTGAAGATCCCAACCTG      | CATGAGCTCCACCACTCTT       | 750                           | 710                               |
| A082      | EK3X9L102GF929            | AACCACCGACTTGTGACAGTT     | CAGCTTCACTCGGGTTACAC      | 750                           | 707                               |
| A088      | EK3X9L102JBXZW            | TGAAAGAAGAGGCCAACACA      | CCAGCCCTCAAAGTGTCTT       | 749                           | 709                               |
| A090      | EK3X9L101AVFGZ            | CAGGCAGGAGGAGCTATGAG      | GCTGACAAATGGGAAGCAAT      | 750                           | 710                               |
| A091      | EK3X9L102HYK2I            | AGGTTGGCCATTAGGCTAGG      | TAACGCATCCCTGGGTTAAG      | 745                           | 705                               |
| A092      | EK3X9L102GY7B7            | TTCAGAGAACGAACATCCA       | CGATGACATGTTTCCACAT       | 720                           | 679                               |
| A093      | EK3X9L102F4X94            | CCTCCAGGAGACTTCTCTTA      | AAAGGGTTGGAGGATCAAGG      | 743                           | 703                               |
| A094      | EK3X9L101ET8NT            | ATGCGGTCTGGAACAACAGC      | TGTGCCAAGGACTGTGCTAA      | 749                           | 709                               |
| A097      | EK3X9L102JWQH1            | CGTCTCTTCTGAATCTGGC       | CTCCTTTGAAGCAAGGATGG      | 750                           | 710                               |
| A099      | EK3X9L102IKMWQ            | TGGGAGTGAGGATGAAGCTC      | TTGGTTGGTCCGGAGTGTAT      | 750                           | 710                               |
| A101      | EK3X9L102IYRPJ            | CCCTACTATAITGTCTGCGGG     | TAACGGCCACTGCTCCTCA       | 750                           | 708                               |
| A102      | EK3X9L101EAN2W            | GTTGCCATGAGATGGAACCT      | CTGCTTGCCTTGTATGTGATG     | 746                           | 706                               |
| A103      | EK3X9L101DG80A            | CACGTCATTAACCACTGGA       | CAGTAGGCAACCCGTGATGT      | 750                           | 710                               |
| A104      | EK3X9L101D826E            | AGTTCTCTTGTCTGCGCCC       | TGCATCAATTTGCTCAACC       | 737                           | 697                               |
| A106      | EK3X9L101DD6LB            | GTGAAGCAGGGTGACAAGGA      | TGGTTAACTGAAAGGTGGATGA    | 748                           | 706                               |
| A107      | EK3X9L102JTIFO            | TGTTTCTGGTGTCTCGGATG      | CCCAACTGAACCAGAAGGAG      | 746                           | 706                               |
| A111      | EK3X9L102HJ5E6            | GATGTGGCAGTCTGCTTCTG      | CTGGCTCCAGTCTCTCACT       | 747                           | 707                               |
| A113      | EK3X9L102G11JT            | TAGGAGGTAACCTGCCACGG      | CCAGATGAACTGAGAGCTTGG     | 750                           | 709                               |
| A115      | EK3X9L101ANZ5L            | ACCAGATCTTGTCTGCCCAT      | AGCGATGTTTCTCCACCAT       | 750                           | 710                               |
| A118      | EK3X9L102ITWWD            | CCTGAGGTAGACCTGGTGA       | TTCACTTTGGAGCTCTGGT       | 743                           | 703                               |
| A120      | EK3X9L101BVY86            | GCTGACCCTCACTCAGACCT      | AATCCGCTGCTGCTTCTTA       | 747                           | 707                               |
| A121      | EK3X9L102F5KTB            | CACACAATCTGATGTGGCCT      | GCAGTGTTTGCCTTCACTA       | 749                           | 709                               |
| A124      | EK3X9L102IJEPM            | TGGCACTGACTCAATAAGGA      | ATACGCCTGGACATCTGCAA      | 750                           | 710                               |
| A125      | EK3X9L101EHT4U            | GAGTAGGCTGTGGCTGG         | GAGTTTGGTGTACTGAGGCA      | 750                           | 710                               |
| A126      | EK3X9L101EBD6G            | CACCAGGGCTTGCACACAT       | TTGCAACATAGTGGAGGGA       | 737                           | 697                               |
| A127      | EK3X9L101BJV3L            | TGTCAAGTGGATCCCAAAC       | CCCTGTGATGATGAGTCTGC      | 750                           | 710                               |
| A129      | EK3X9L102IM99N            | AGCTCCACCACTGCCACTAC      | CTCTAGGCCCTCTGTCAGGC      | 750                           | 710                               |
| A130      | EK3X9L102H1ZVD            | GTCAGCCACCAAGGATTTCT      | GGACCAGGACCTGATTGAGA      | 749                           | 710                               |
| A131      | EK3X9L101C1TEE            | GAAGTCCCTTCCACAGGTGT      | GCTGAGCTTTCTCTGAAAC       | 749                           | 708                               |
| A133      | EK3X9L102F6FN8            | CAGCTTTCAGGTAGCATGGG      | TTCTCCACCTTCTGGTC         | 750                           | 711                               |
| A137      | EK3X9L101EDFZR            | GGGACCGATTGAGATGTTTC      | TCCATACTGGAGGCTGTGGT      | 750                           | 710                               |
| A138      | EK3X9L102GH91C            | TGCAGTCATCTCAAAGGGCT      | AGAGAGAAGGCGCTTGACATA     | 750                           | 710                               |
| A139      | EK3X9L101DWNEV            | CCGACAGCTCCAGTGGTTC       | AGGCAAGAGATGCTGAGTGG      | 747                           | 707                               |
| A141      | EK3X9L102GMTFT            | TGTTTGTGTTTTCAGGGTTC      | GGATGGCTCCATCAATTAAG      | 746                           | 706                               |
| A144      | EK3X9L102GYTBB            | CTCGGCTGTAACCGAAATA       | GATGGCAACGAGCTTGGTAT      | 749                           | 709                               |
| A146      | EK3X9L101E5Q3R            | GGAAACTGAGTTCAGCTCCAT     | AGCTCCCTACCTCTTGTGTA      | 750                           | 709                               |
| A149      | EK3X9L101CEAIR            | GCACACCTGGATTAACCGAA      | ATACTCCCACTGCTCTCCC       | 750                           | 710                               |
| A151      | EK3X9L101EOTRO            | CTCCATGGTATTGGGAAAG       | TGACACATACCTGCCAGAGC      | 745                           | 705                               |
| A152      | EK3X9L101EPXIX            | ATGATGGGCTCAGGCATAAC      | GGCTAGTGACGAGGCAACTT      | 749                           | 709                               |

A11-long

| target ID | read ID GenBank SRA010805 | F-Primer 5'-3'          | R-Primer 5'-3'          | product length in bp amplicon | product length in bp w/out primer |
|-----------|---------------------------|-------------------------|-------------------------|-------------------------------|-----------------------------------|
| A153      | EK3X9LI02INS8N            | AGTCAGAACCGACTCAACGG    | TGTGTCGTCTTAATCTCCTCCA  | 750                           | 708                               |
| A154      | EK3X9LI02FZCNA            | GAAGGACTACAGTGGAGGACTGA | CCACCATTGCTAGAACCTG     | 749                           | 706                               |
| A158      | EK3X9LI02GM7LC            | TTAGGTGCCGTTGAGTTGGT    | TTGCTTGCCAAGAGTGAAGA    | 750                           | 710                               |
| A160      | EK3X9LI02IKVA4            | TCCATGTGGTGCACAAAC      | GCTCCTCCATGTGGAATACG    | 750                           | 710                               |
| A164      | EK3X9LI02FL5QN            | CAGAGTCTGCTGTGTGGC      | AAGCTTCCAATAGACATTTGCT  | 750                           | 708                               |
| A165      | EK3X9LI02GFCPO            | GGTCTTGTGGCCTGACATT     | CTCTAGGAAACACGCCAACA    | 750                           | 710                               |
| A166      | EK3X9LI02JIUKM            | ACACACATGGGTGGGATTCT    | CCCACCAGCAATGAACAAG     | 750                           | 711                               |
| A168      | EK3X9LI02GZ29S            | CTGTGAGTCGGTTTGGACT     | CACAACCTTGCTTGCTGAAA    | 750                           | 710                               |
| A169      | EK3X9LI01CFYE6            | AGGTTAGTGGAGCTGGCAGA    | TCGTACCAACACATGTTCA     | 746                           | 706                               |
| A170      | EK3X9LI02I8SIM            | CCCACGTCCATAAACCAATTG   | ATGTGGACAGGTTGACACA     | 739                           | 699                               |
| A171      | EK3X9LI01CDPOM            | TGACCTGTGACACTGCAGAC    | CTCTGGCTCTACTGGTTGCC    | 750                           | 710                               |
| A177      | EK3X9LI01DNN7S            | CACATCGCAGATCAGTGGAC    | CAGTGTGGCCATGAAGACTG    | 750                           | 710                               |
| A179      | EK3X9LI01DLN0U            | CTCTGTCTGCTTGTCTCCC     | TGGAAACAGAAGCCAACAGAT   | 749                           | 708                               |
| A180      | EK3X9LI02GECMC            | AGAAGGGCCACAGAGTCTCA    | AAATCGAATGCTTCAGGGTG    | 750                           | 710                               |
| A181      | EK3X9LI02JOYBY            | ATTGGAACACTTGCCACAGC    | CCCAGTCTCTGAGCCACG      | 655                           | 617                               |
| A184      | EK3X9LI02IDCDD            | CCCAAGTGCCTGTCTGAGT     | TCCGACTCTCTCAGTCCCTC    | 750                           | 710                               |
| A186      | EK3X9LI01BIKBU            | GACACTGCCTGGTGAAGGAC    | AGTCTGGAAGCTCCACCAAA    | 745                           | 705                               |
| A187      | EK3X9LI02FRKY4            | GGGACCCAAACAAGCAAATA    | TCTCATGGCTATCACAAAGC    | 749                           | 709                               |
| A188      | EK3X9LI01DOVZU            | CCAATCCTGATGCTCTGTTT    | CAAGTTGAAAGAACGGGAAGAAA | 750                           | 708                               |
| A190      | EK3X9LI01A0OZO            | TGTTTGTGCCACCTAGGCTT    | AAGGCACCACAGAAGAAAGG    | 748                           | 708                               |
| A192      | EK3X9LI01BZ6AP            | CCCTTCTCTTCTTGCTGC      | TGCTCAGCCTTCTGAAAGAAA   | 750                           | 709                               |
| A195      | EK3X9LI01D9AK9            | GTCCGAGGCGTAGGAAGTG     | TTGATGTTACAGGATTGGG     | 750                           | 711                               |
| A200      | EK3X9LI02I9BMY            | CTTCTGTCCGTCCCTCTCA     | TGTCTCAGCTCCTGTAGCCC    | 749                           | 709                               |
| A206      | EK3X9LI01EYOLN            | ATAATTCCGCTGCTGCTTTG    | CTTGCTGACCCCTCACTCAGA   | 750                           | 710                               |
| A207      | EK3X9LI01AG3ZZ            | CTGAAATGCTTTGATGGCAA    | AGAACGCCAAAGACACAAGG    | 749                           | 709                               |
| A211      | EK3X9LI02HVV0D            | TCAGCTATTGTGAAGGCTCG    | CACACTATCTCGTCAGGGCA    | 749                           | 709                               |
| A213      | EK3X9LI02GE17J            | TGAGTTGCTGGAGACCAGG     | GGCCAGGTAGGTGAAGTCAA    | 750                           | 711                               |

A1 = short

**Target and primer information used for sequencing error rate estimations of the mastodon shotgun sequencing:** read ID corresponds to the read in the short read archive SRA010805, PCR product length with and without primers is given. Targets (see round A.1) were divided into two targets, primer set  $\alpha$  uses the already existing forward primer from round A.1 and primer set  $\beta$  utilizes the existing reverse primer from round A.1, the corresponding (sometimes degenerated) primer per pair was designed using all available sequence information (modern elephants, mastodon and mammoth).

| target ID | primer set | read ID<br>GenBank<br>SRA010805 | F-Primer 5'-3'            | R-Primer 5'-3'              | product length in bp amplicon | product length in bp w/out primer |
|-----------|------------|---------------------------------|---------------------------|-----------------------------|-------------------------------|-----------------------------------|
| A001      | $\alpha$   | EK3X9L01BLRFR                   | TGGTCTCGAAGTCAGACAAGAG    | TGTCAGAATTGCTTCCTTG         | 96                            | 54                                |
| A002      | $\alpha$   | EK3X9L02F3RBB                   | GCATTTTGATTGCATGTTTGA     | ATATTATCCAAATTTATAAACCAACCA | 112                           | 64                                |
| A003      | $\alpha$   | EK3X9L02HKE1R                   | TATAGTTCCAGGCTCCACGG      | TGGAGTATTTCAGGCAGAGAGA      | 122                           | 80                                |
| A007      | $\alpha$   | EK3X9L01C7BYB                   | TTTTCTGTGTTTGTGCATGT      | GGRTRRCTCAAGGAGGCAAAA       | 123                           | 81                                |
| A009      | $\alpha$   | EK3X9L01C7XKW                   | TTTCTATTCCATGAATGAACCA    | TGGCAATTCACAGAAAACCTCA      | 122                           | 77                                |
| A011      | $\alpha$   | EK3X9L01AQJCF                   | GCTTCATTTGTTGTGCGTG       | AGCTGGCTTCCTGTTGTTGT        | 76                            | 36                                |
| A012      | $\alpha$   | EK3X9L01BCGQI                   | CACTCCAGCAGCACCCAGAC      | AGGTGCAGTTTGCCGAGTAG        | 103                           | 64                                |
| A014      | $\alpha$   | EK3X9L01AIIIP7                  | CTTCTCTGGGCAAAGTCCA       | YATYCTTGYGTTGATGTR          | 101                           | 61                                |
| A015      | $\alpha$   | EK3X9L02JWLAQ                   | GAGTTACCGAGAGGGGAAR       | TGCAAAACAAAGACTCAAAGGA      | 128                           | 86                                |
| A016      | $\alpha$   | EK3X9L01EN54P                   | TCGGACAACAGGACCCCTAC      | RGATGAATGGGTCACTACGG        | 109                           | 69                                |
| A017      | $\alpha$   | EK3X9L02I9G0E                   | CTGCTCTGCCCAATCTTC        | GGCTGTGAGGAGCCAGA           | 100                           | 62                                |
| A019      | $\alpha$   | EK3X9L01C0K93                   | AACCACCATTTGCCACTTTG      | GGCAGTTGAGAAGTTGCACT        | 103                           | 62                                |
| A020      | $\alpha$   | EK3X9L02F9G0Q                   | GAATAACATCAGACGGTGCG      | AGCCACCCCACTGACT            | 103                           | 65                                |
| A021      | $\alpha$   | EK3X9L01CTJZY                   | GCTTACCACACAAATCCCC       | TGTGAGTTTTGACCYATTAGAGTG    | 110                           | 66                                |
| A026      | $\alpha$   | EK3X9L02FFWKW                   | CCCAGCATTAAACAATCTTAAAA   | AAACACAAAGCTGTTAACCA        | 101                           | 55                                |
| A033      | $\alpha$   | EK3X9L01B83XL                   | TGACTGACAACAGCAAGGCT      | GGAAAGCAGTTCAGGAAAT         | 118                           | 78                                |
| A034      | $\alpha$   | EK3X9L01AEV4R                   | GGTACCAAACTTGCAT          | RCCAGGGCTTAGCTAGAGAG        | 108                           | 69                                |
| A036      | $\alpha$   | EK3X9L01AHAIX                   | CATGAAAAATGCTGTTAAAAACC   | TCTGTTTACATRTTCTTGG         | 112                           | 67                                |
| A038      | $\alpha$   | EK3X9L02IMKVX                   | AGGGATCAAATGTTGTTTCA      | CATTCTGAGCTGCGTTGTG         | 101                           | 59                                |
| A040      | $\alpha$   | EK3X9L02JSOT0                   | AAGGCCACTCTGGCTTCT        | GCAGAAGGATGRGTCTCARAGC      | 128                           | 86                                |
| A042      | $\alpha$   | EK3X9L01BE9T9                   | GACATCCAAACATTTTCAGGC     | TCTGGRATGAAGGACATCA         | 112                           | 71                                |
| A044      | $\alpha$   | EK3X9L02GFDDDD                  | GTGGGTCTACAAATCACC        | GCTTGGCACCATTGCTTAG         | 107                           | 67                                |
| A046      | $\alpha$   | EK3X9L01A3SP9                   | GCTGCAGTCTTTGAATAA        | GTGCCAGTTCCAAAGAAAGG        | 111                           | 71                                |
| A047      | $\alpha$   | EK3X9L01AZEP9                   | GGGACTCTAGGACAATCCAG      | GTCCACCTGCCCTGTAG           | 99                            | 59                                |
| A048      | $\alpha$   | EK3X9L02GRG6Q                   | AGGGGAACCATGTCTTGTAT      | GAGAGTCTGTGCTTTGGACA        | 113                           | 71                                |
| A049      | $\alpha$   | EK3X9L02HZSM7                   | TGTTGTGTAGGTGCTGTGG       | CAAYGATTGAGKATGGTK          | 101                           | 60                                |
| A050      | $\alpha$   | EK3X9L02JDDAK                   | AGGAATCGGGTGAGTGAGTG      | CTTCCAGGACAGGACTG           | 99                            | 59                                |
| A051      | $\alpha$   | EK3X9L01AX9UU                   | TTGTGATCAGAGTTTTCGGG      | GGRGTGAGTCCCCCAAG           | 126                           | 88                                |
| A052      | $\alpha$   | EK3X9L02G8P4Z                   | GTCTCTCTGATGTTGGGCT       | ATGACTGGTGGGRRAGTT          | 99                            | 60                                |
| A054      | $\alpha$   | EK3X9L01E21T5                   | CGACTCAACACATCAAGCAAA     | CAACTCAAACCTTTACAAAAGCAA    | 125                           | 79                                |
| A056      | $\alpha$   | EK3X9L02JVJWB                   | TTTGGGTTAAATGGACAGCC      | TTGGTAGTGGTGTATTGAA         | 98                            | 56                                |
| A057      | $\alpha$   | EK3X9L01DC6HA                   | AGCTCAAGACCTATGCTGG       | CCTYYAAACCCATCSAGAAG        | 125                           | 85                                |
| A061      | $\alpha$   | EK3X9L02HQFHE                   | TGGTTAAGAGCTCAGGCTGC      | GGGCCATAAGACAGGGTAG         | 101                           | 61                                |
| A064      | $\alpha$   | EK3X9L02HHRV7                   | TAGCAAACCTTGGCTGCCT       | TTYAYTGTGCTTAGGGTTG         | 101                           | 61                                |
| A065      | $\alpha$   | EK3X9L01C7PXN                   | ATGGTGATGGGAGCTTGTAC      | CAACATTTGCCAATCAACG         | 108                           | 68                                |
| A066      | $\alpha$   | EK3X9L01C28PT                   | TCTAGGGACTGGACCCTCCT      | TGCCAGAAGAATAAACAGGTCT      | 108                           | 66                                |
| A069      | $\alpha$   | EK3X9L02II2C9                   | TCAGTTAACACCCACATCTGTCT   | CTTSCCTTCCSTTCCCTTC         | 135                           | 93                                |
| A071      | $\alpha$   | EK3X9L02HHLB0                   | CCAATGCCATTAATAACAGAAA    | AGGCTTCAATGGGTGAGTG         | 108                           | 65                                |
| A075      | $\alpha$   | EK3X9L01DSVGO                   | CACCTGAGGACTGAGTTG        | ACYAGATGCCACTACCAA          | 107                           | 68                                |
| A076      | $\alpha$   | EK3X9L02FH2ZJ                   | CAAATTCATGCGCATTATCA      | ACAATTTCTTCTCTGACTTCC       | 97                            | 51                                |
| A077      | $\alpha$   | EK3X9L01CPQOZ                   | GGACTGGAAAGCAAACCCCT      | TGGCTTTAGCKGAAAGATT         | 125                           | 85                                |
| A078      | $\alpha$   | EK3X9L01C26GN                   | GCGGATTCCTGTATGGTT        | CAGGYAGAGCCGAGACAT          | 108                           | 70                                |
| A082      | $\alpha$   | EK3X9L02GF929                   | AAAACAGAGCCAAAGTGGTG      | AGAGTCTCTGGYGACAAT          | 108                           | 69                                |
| A083      | $\alpha$   | EK3X9L01D5415                   | TCTTGTCTTGGGACGGATAC      | AGTGGCCGAGRTGGTTTG          | 120                           | 82                                |
| A084      | $\alpha$   | EK3X9L01BVALO                   | GCATGTGTGAGCTTCCCT        | GCAGTAAAGSCTGGGAAGG         | 117                           | 78                                |
| A085      | $\alpha$   | EK3X9L02FPCGC                   | GCTCCACTGTGTGAGTCATCAT    | GTAGCAGGGCAGGAGAGGAG        | 113                           | 71                                |
| A086      | $\alpha$   | EK3X9L01BLH35                   | ACACCTCTGAGCTCCCTGA       | GGGSCAATCCTTAYTGTGTG        | 95                            | 55                                |
| A087      | $\alpha$   | EK3X9L02HII8H                   | AATTTGCAAGGCTCAGTGTCT     | GGGGTTTACGCTTAGAGG          | 112                           | 73                                |
| A088      | $\alpha$   | EK3X9L02JBXZW                   | TGCTGTGTCAAAGCCTGAG       | CTTGAAGGGGCTTTGAGAGA        | 107                           | 67                                |
| A090      | $\alpha$   | EK3X9L01AVFGZ                   | TACATTCGCTACCTCCCTG       | TCTGTGTACAGACTGCTTTGG       | 110                           | 67                                |
| A001      | $\beta$    | EK3X9L01BLRFR                   | AGGGCTTTGTAACAGTGAACAC    | TCAGGACTTGCCTGTTCAGTT       | 140                           | 96                                |
| A002      | $\beta$    | EK3X9L02F3RBB                   | CAATTTCTCATCTTTGGCTTT     | AAATTTGAGATCTGTCCCGAA       | 135                           | 91                                |
| A003      | $\beta$    | EK3X9L02HKE1R                   | AGGGAGAAGCTTGGGACAG       | ATAAGCAGTCAAGAGCCCGA        | 121                           | 81                                |
| A007      | $\beta$    | EK3X9L01C7BYB                   | CCTTGACACTGATAACTGGAG     | AGCTAATGGAAGAAATGATGAAGT    | 131                           | 85                                |
| A009      | $\beta$    | EK3X9L01C7XKW                   | AKTCCCYRATTACTACTAAGATTGT | CAAACAAATGAGAAAACAGTGC      | 108                           | 59                                |
| A011      | $\beta$    | EK3X9L01AQJCF                   | AGGCAGGGCTGACTCSAT        | ACTCTGCTGTGATGCTGG          | 106                           | 68                                |
| A012      | $\beta$    | EK3X9L01BCGQI                   | AAAGGCTCTGCCCTGCA         | GAGTGGGTTTATTGTACCA         | 124                           | 87                                |
| A014      | $\beta$    | EK3X9L01AIIIP7                  | GYCCTTGAAWRTCACTGMTT      | CATCCTCCCAACCTTTCAA         | 90                            | 50                                |
| A015      | $\beta$    | EK3X9L02JWLAQ                   | AACAGAAGTATGGCTTCTTGG     | TCATCTCAGTGACCAAACCTGAA     | 110                           | 65                                |
| A016      | $\beta$    | EK3X9L01EN54P                   | TGACACAGGACCTATGAGTG      | CTGTGCCATGTGGAAACAAA        | 110                           | 69                                |
| A017      | $\beta$    | EK3X9L02I9G0E                   | GGAGAGAGCCCTCTGAGCC       | CAGTCTGTGGCATGTCTGT         | 123                           | 83                                |
| A019      | $\beta$    | EK3X9L01C0K93                   | GGAGGTCCAGGAGAGCTTTT      | CAGCTGCCAACAACATG           | 109                           | 71                                |
| A020      | $\beta$    | EK3X9L02F9G0Q                   | GCCAGTGTGGTRGGTGACC       | TAGCTGGAACCTTGCCTGG         | 110                           | 71                                |
| A021      | $\beta$    | EK3X9L01CTJZY                   | AAAAATTTGGTCAACTCACTG     | AGAAATGACCATGAGCGGG         | 117                           | 73                                |
| A026      | $\beta$    | EK3X9L02FFWKW                   | TGATTTGGTTATACGCTTCACTCA  | AACTAACATGGTCAGCCTTGC       | 106                           | 62                                |
| A033      | $\beta$    | EK3X9L01B83XL                   | AARAGGCTTTTGCAGCAGATT     | GCAACATCATGATAAGTGGAGAA     | 119                           | 74                                |
| A034      | $\beta$    | EK3X9L01AEV4R                   | TCACCTCTCCCTCCTAAC        | GCTGTGTGGAGTTAGGGACC        | 120                           | 80                                |

A.1 = short

| target ID | primer set | read ID GenBank SRA010805 | F-Primer 5'-3'              | R-Primer 5'-3'            | product length in bp amplicon | product length in bp w/out primer |
|-----------|------------|---------------------------|-----------------------------|---------------------------|-------------------------------|-----------------------------------|
| A036      | β          | EK3X9LI01AHAIX            | TCACACACACCACCTGTTC         | TCACTCTAATTCTTCATCCTTCCA  | 115                           | 71                                |
| A038      | β          | EK3X9LI02IMKVX            | TTCTCTGCYCTTCAAATTCA        | TCTTCCCATTCTCAGAGG        | 94                            | 54                                |
| A040      | β          | EK3X9LI02JSOT0            | TGTGTGCTATCAGCCCTCAC        | GTTTGCTCAAAGCTGTGGG       | 125                           | 85                                |
| A042      | β          | EK3X9LI01BE9T9            | GTGAAGCTCTGTGAGGAGCA        | TGGAAGGTGCTCAGTGCTTA      | 119                           | 79                                |
| A044      | β          | EK3X9LI02GFDDD            | AACRCGCCCTTCTGRITTY         | CACAGTGAYTAAAGCGGAA       | 92                            | 54                                |
| A046      | β          | EK3X9LI01A3SP9            | AATTTCTCACTCTGTTGGATCA      | TGATGCAGTGGTTGAGGTGT      | 116                           | 73                                |
| A047      | β          | EK3X9LI01AZEP9            | GCTRCRYGTCTAGTACTG          | AAACTGCACCTGGCCTTATG      | 90                            | 50                                |
| A048      | β          | EK3X9LI02GRG6Q            | AATGTCCYCAAAGGAGCTG         | GAACGGACAGCCTGTGGTT       | 118                           | 78                                |
| A049      | β          | EK3X9LI02HZ5M7            | GCMACCCATGTACAACAGA         | GACCCCTAAGGAGATGGTTG      | 116                           | 76                                |
| A050      | β          | EK3X9LI02JDDAK            | AGGCTGTCTATGGGGCTTG         | CCACACTAAAAGGGACCCAA      | 107                           | 69                                |
| A051      | β          | EK3X9LI01AX9UU            | AGGGCCAGCTGCTTCAG           | ACACTGCAGGGGGCTCAAC       | 105                           | 70                                |
| A052      | β          | EK3X9LI02G8P4Z            | TGCCCTTTCGAGTATCMCA         | CATGTGGAGAACCTCCTTTC      | 99                            | 58                                |
| A054      | β          | EK3X9LI01E21TS            | TCTCCCTGGTCTCATCATCA        | TCCCTCAATCCAACAGCAT       | 116                           | 76                                |
| A056      | β          | EK3X9LI02JVJWB            | TTGTGGTGAGAGCTCCTTT         | TTCTGCAATAAAGATTGGC       | 100                           | 60                                |
| A057      | β          | EK3X9LI01DC6HA            | AAGCAAACAACARGCAGTCC        | CTCGGCTGACTTTCCTTCC       | 115                           | 75                                |
| A061      | β          | EK3X9LI02HQFHE            | CAAAAGCCRRGGAATCAGA         | ACTCACTGCCATCGAGTCAA      | 110                           | 70                                |
| A064      | β          | EK3X9LI02HHRV7            | ATGTTCTTTCTGGGGCTGCT        | CTGCAGTCAGTCTTGACAGA      | 109                           | 69                                |
| A065      | β          | EK3X9LI01C7PXN            | TCACTAAATGCACMCCTGAAAA      | AGAAAAACAGACTGCGTGCCT     | 103                           | 60                                |
| A066      | β          | EK3X9LI01C28PT            | CAAAGTCTGCCATCCTCAC         | TGCATAAAAAGATGGACAATGAA   | 127                           | 84                                |
| A069      | β          | EK3X9LI02H2C9             | TGGGTCTTTGGCTAGGAAG         | GCCTTCTTTGCTTTCTTCTT      | 117                           | 77                                |
| A071      | β          | EK3X9LI02HHLB0            | AAGGGTGGAGCATTCTATG         | TTATGAAAGTGAATTAGACACGAAA | 120                           | 75                                |
| A075      | β          | EK3X9LI01DSV0             | TGTAAGAAAAATGTTCTACATCCAA   | TTTGTACAGAAAAGATCAAACA    | 108                           | 59                                |
| A076      | β          | EK3X9LI02FH2ZJ            | GCACCATCCCTGTGATTCTC        | AGATCAGCCCAAAGGGTTTT      | 124                           | 84                                |
| A077      | β          | EK3X9LI01CPQ0Z            | TGGRATGCTTGACTTCCAGA        | GCTTAAGGCATTTGTGAAATCAT   | 101                           | 58                                |
| A078      | β          | EK3X9LI01C26GN            | TTTTCTTTGCAAGTCCACTG        | TGCTGAGAGTGTGTGTGTGC      | 113                           | 72                                |
| A082      | β          | EK3X9LI02GF929            | CTTTTGGCCCAATGGAAG          | CAGATCTTGAGATGGGCCAC      | 106                           | 68                                |
| A083      | β          | EK3X9LI01D5415            | TTAACGCTCACAGCCTGCTA        | ATGACGGGGCTTCTTCTTT       | 118                           | 78                                |
| A084      | β          | EK3X9LI01BVALO            | AGGAAGGAGAAGAGCAGYCTTG      | GCAGGATTCTTGCTTGCTTC      | 110                           | 68                                |
| A085      | β          | EK3X9LI02FPCGC            | CTCTAGCCCAAGTGGCYTTC        | TGCTGCAGAGACAGAAGGAA      | 115                           | 76                                |
| A086      | β          | EK3X9LI01BLH35            | AGGGTCTTGCTRCCTTCTCCT       | TGCTGTGTCGACTCCTCTTG      | 107                           | 67                                |
| A087      | β          | EK3X9LI02HII8H            | CATGAATTTCAAGAAGGAGATGT     | CTGCCGGTTCTCTACTCAGG      | 115                           | 72                                |
| A088      | β          | EK3X9LI02JBXZW            | CATGTTGCCATCAGCTCTT         | AACGGCAATCCCATTTTACA      | 120                           | 79                                |
| A090      | β          | EK3X9LI01AVFGZ            | GAACCTCAGTTAAATCCAATAGTAGTC | TGGGCAGGATTCAATAGGAG      | 128                           | 81                                |
