# Supplementary material for: Genomic DNA Sequences from Mastodon and Woolly Mammoth Reveal Deep Speciation of Forest and Savanna Elephants
Source: PubMed Central journal article supplement (PMC3006346; doi:10.1371/journal.pbio.1000564), 2010-12-21
Supplement: pbio.1000564.s003.pdf [file pbio.1000564.s003.pdf]

347

1 1 1 1 1  
5 108

|            |                                      |                          |                          |                          |                          |
|------------|--------------------------------------|--------------------------|--------------------------|--------------------------|--------------------------|
| ASIAN2_Ema | GAAGGGCTTT<br>CAATTTTTCA<br>AGGGMATT | TGTAACAGTG<br>ATCGGTTGAC | AACACACAGG<br>AGGCATTTTC | ATCAAGKAAG<br>TTTCCTTATT | CAATTCTGGA<br>TGGAATTAAG |
| FOR_DS1535 | GAAGGGCTTT<br>CAATTTTTCA<br>AGGGAATT | TGTAACAGTG<br>ATCGGTTGAC | AACACACAGG<br>AGGCATTTTC | ATCAAGGAAG<br>TTTCCTTATT | CAATTCTGGA<br>TGGAATTAAG |
| MAM1_A001_ | GAAGGGCTTT<br>CAATTTTTCA<br>AGGGAATT | TGTAACAGTG<br>ATCGGTTGAC | AACACACAGG<br>AGGCATTTTC | ATCAAGGAAG<br>TTTCCTTATT | CAAT-CTGGA<br>TGGAATTAAG |
| MAST_A001_ | GAAGGGCTTT<br>CAATTTTTCA<br>AGGGAATT | TGTAACAGTG<br>ATCGTTTAC  | AACACACAAG<br>AGGCATTTTC | ATCAAGGAAG<br>TTTCCTTATT | CAATTCTGGA<br>TGGAATTAAG |
| SAV1_SE210 | GAAGGGCTTT<br>CAATTTTTCA<br>AGGGAATT | TGTAACAGTG<br>ATCGGTTGAC | AACACACAGG<br>AGGCATTTTC | ATCAAGGAAG<br>TTTCCTTATT | CAATTCTGGA<br>TGGAATTAAG |

1 1 1 1 1  
5 103

|            |                                 |                           |                          |                         |                           |
|------------|---------------------------------|---------------------------|--------------------------|-------------------------|---------------------------|
| ASIAN2_Ema | TGGGTTGCCT<br>ATGTCCCTGG<br>TGA | TTAGGGAGAA<br>TTCAC TTGAG | GTCTTGGGAC<br>CGCTCTCTCT | AGGCCCTCC<br>GCCTGAAATA | --TCGAGACA<br>CTCCA ACTCT |
| FOR_DS1535 | TGGGTTGCCT<br>ATGTTCTGG<br>TGA  | TTAGGGAGAA<br>TTCAC TTGAG | GTCTTGGGAC<br>CGCTCTCTCT | AGGCCCTCC<br>GCCTGAAATA | --TCGAGACA<br>CTCCA ACTCT |
| MAM1_SP134 | TGGGTTGCCT<br>ATGTCCCTGG<br>TGA | TTAGGGAGAA<br>TTCAC TTGAG | GTCTTGGGAC<br>CGCTCTCTCT | AGGCCCTCC<br>GCCTGAAATA | --TCGAGACA<br>CTCCA ACTCT |
| MAST_A003_ | TGGGTTGCCT<br>ATGTCCCTGG<br>TAA | TTACGGAGAA<br>TTCAC TTGAG | GTCTTGGGAC<br>CGCTCTCTCT | AGGCCCTCT<br>GCCTGAAATA | CCTCGAGACA<br>CTCCA ACTCT |
| SAV1_SE210 | TGGGTTGCCT<br>ATGTCCCTGG<br>TGA | TTAGGGAGAA<br>TTCAC TTGAG | GTCTTGGGAC<br>TGCTCTCTCT | AGGCCCTCC<br>GCCTGAAATA | --TCGAGACA<br>CTCCA ACTCT |

1 1 1 1 1  
5 97

|            |                           |                          |                          |                          |                       |
|------------|---------------------------|--------------------------|--------------------------|--------------------------|-----------------------|
| ASIAN2_Ema | AAATAAAGAC<br>AAGATTTTCAT | TTGATGCCTT<br>TTCATTATAA | GACCACTGAT<br>TATTTTATTT | AACTGGAGGC<br>TGCCTCCTTG | CAGGTCTTGG<br>AGTTATC |
| FOR_DS1535 | AAATAAAGAC<br>AAGATTTTCAT | TTGATGCCTT<br>TTCATTCTAA | GACCACTGAT<br>TATTTTATTT | AACTGGAGGC<br>TGCCTCCTTG | CAGGTCTTGG<br>AGCTATC |
| MAM1_SP134 | AAATAAAGAC<br>AAGATTTTCAT | TTGATGCCTT<br>TTCATTATAA | GACCACTGAT<br>TATTTTATTT | AACTGGAGGC<br>TGCCTCCTTG | CAGGTCTTGG<br>AGTTATC |
| MAST_A007_ | AAATAAAGCC<br>AAGA-TTCAT  | TTGATGCCTT<br>T--A--AAAA | GACCACTGAT<br>TATTTTATTT | AACTGGAGGC<br>TGCCTCCTTG | CAGGTCTTGG<br>AGCCACC |
| SAV1_SE210 | AAATAAAGAC<br>AAGATTTTCAT | TTGATGCCTT<br>TTCATTATAA | GACCACTGAC<br>TATTTTATTT | AACTGGAGGC<br>TGCCTCCTTG | CAGGTCTTGG<br>AGCTATC |

1 1 1 1 1  
5 102

|            |                                |                          |                          |                          |                          |
|------------|--------------------------------|--------------------------|--------------------------|--------------------------|--------------------------|
| ASIAN2_Ema | GTAAAAATAT<br>CCTTTCTTAT<br>TG | CACAATGTGT<br>ATTTATTAAT | ATTCCCCTGA<br>CATTTGAGTT | TTACTACTAA<br>TTCTGTGAAT | GATTGTATAT<br>TGCCAGATTA |
| FOR_DS1535 | GTAAAAATAT<br>CCTTTCTTAT<br>TG | CACAATGTGT<br>ATTTATTAAT | ATTCCCCTGA<br>CATTTGAGTT | TTACTA--A<br>TTCTGTGAAT  | GATTGTATAT<br>TGCCAGATTA |
| MAM1_SP134 | GTAAAAATAT<br>CCTTTCTTAT<br>TG | CACAATGTGT<br>ATTTATTAAT | ATTCCCCTGA<br>CATTTGAGTT | TTACTACTAA<br>TTCTGTGAAT | GATTGTATAT<br>TGCCAGATTA |
| MAST_A009_ | GTGAAAATAT<br>CCTTTCTTAT<br>TG | CACAATACGT<br>ATTTATTAAT | AGTCCCCCAA<br>CGTTTGAGTT | TTACTACTAA<br>TTCTGTGAAT | GATTGTACAT<br>TGCCAGATTA |
| SAV1_SE210 | GTAAAAATAT<br>CCTTTCTTAT       | CACAATGTGT<br>ATTTATTAAT | ATTCCCCTGA<br>CATTTGAGTT | TTACTACTAA<br>TTCTGTGAAT | GATTGTATAT<br>TGCCAGATTA |

TG

1 1 1 1 1  
5 95

|            |            |            |            |            |            |
|------------|------------|------------|------------|------------|------------|
| ASIAN2_Ema | GGTTTCCATG | AGGCAGGGCT | GACTCSATGG | AAGCTAACAA | CAACAGGAAG |
| FOR_DS1535 | CCAGCTGGCA | GGGGYGCCTG | GGCAGTGTAG | CCTGGAAAGC | CCTGT      |
| MAM1_SP134 | GGTTTCCATG | AGGCAGGGCT | GACTCCATGG | AAGCTAACAA | CAACAGGAAG |
| MAST_A011_ | YCACGTGGCA | GGGGCGCCTG | GGCAGTGTAG | CCTGGAAAGC | CCTGT      |
| SAV1_SE210 | GGTTTCCATG | AGGCAGGGCT | GACTCGATGG | AAGCTAACAA | CAACAGGAAG |
|            | CCAGCTGGCA | GGGGTGCCTG | GGCAGTGTAG | CCTGGAAAGC | CCTGT      |
|            | GGTTTCCATG | AGGCAGGGCT | GACTCGATGG | AAGCTAACAA | CAACAGGAAG |
|            | CCAGCTGGCA | GGGGCGCCTG | GGCAGTGTAG | CCTGGAAAGA | CCTGT      |
|            | GGTTTCCATG | AGGCAGGGCT | GACTCCATGG | AAGCTAACAA | CAACAGGAAG |
|            | CCAGCTGGCA | GGGGCGCCTG | GGCAGTGTAG | CCTGGAAAGC | CCTGT      |

1 1 1 1 1  
5 99

|            |            |            |             |            |            |
|------------|------------|------------|-------------|------------|------------|
| ASIAN2_Ema | CAATGACAAA | GGCTCTGCC  | GTCAGAGGGA  | CCCTGCAGCC | CGTGCCAGTG |
| FOR_DS1535 | TGCACGCCCC | GGCCTACTCG | GCAAACCTGCA | CCTCAGCTGC | CGGCCAGGG  |
| MAM1_SP134 | CAATGACAAA | GGCTCTGCC  | GTCAGAGGGA  | CCCTGCAGCC | CGTGCCAGTG |
| MAST_A012_ | TGCACGCCCC | GGCCTACTCG | GCAAACCTGCA | CCTCAGCTGC | CGGCCAGGG  |
| SAV1_SE210 | TAATGACAAA | GGCTCTGCC  | GTCAGAGGGA  | CCCTGCAGCC | CGTGCCAGTG |
|            | TGCACGCCCC | GGCCTACTCG | GCAAACCTGCA | CCTCAGCTGC | CGGCCAGGG  |
|            | CAATGACAAA | GGCTCTGCC  | GTCAGAGGGA  | CCCTGCAGCC | CGTGCCAGTG |
|            | TGCACGCCCC | GGCCTACTCG | GCAAACCTGCA | CCTCAGCTGC | CGGCCAGGG  |

1 1 1 1 1  
5 94

|            |            |            |            |            |            |
|------------|------------|------------|------------|------------|------------|
| ASIAN2_Ema | AGTCCTCCT  | CAGTGAAGAC | CACAACCATG | CCCTTGAATG | TCACTGCTTC |
| FOR_DS1535 | CTACAACATC | AAGCGCAAGA | ATG-CCCAGT | CTTAGAACTA | TCAC       |
| MAM1_SP134 | AGTCCTCCT  | CAGTGAAGAC | CACAACCRTG | TCCTTGAATG | TCACTGCTTC |
| MAST_A014_ | CTACAACATC | AAGCGCAAGA | ATG-CCCAGT | CTTAGAACTA | TCAC       |
| SAV1_SE210 | AGTCCTCCT  | CAGTGAAGAC | CACAACCATG | CCCTTGAATG | TCACTGCTTC |
|            | CTACAACATC | AAGCGCAAGA | ATG-CCCAGT | CTTAGAACTA | TCAC       |
|            | AGTCCTCCT  | CAGTGAAGAC | CACAACCRTG | TCCTTGAATG | TCACTGCTTC |
|            | CTACAACATC | AAGCGCAAGA | ATG-CCCAGT | CTTAGAACTA | TCAC       |
|            | AGTCCTCCT  | CAGTGAAGAC | CACAACCRTG | TCCTTGAATG | TCACTGCTTC |
|            | CTACAACATC | AAGCGCAAGA | ATG-CCCAGT | CTTAGAACTA | TCAC       |

1 1 1 1 1  
5 95

|            |            |            |            |            |            |
|------------|------------|------------|------------|------------|------------|
| ASIAN2_Ema | CAAGGAATGA | CACAGGACCC | TATGAGTGTA | GAACCTGGAA | CCAAGTGAAT |
| FOR_DS1535 | GCCCCCCGTA | GTGACCCATT | CATCCTGAAT | GTTCTCTGTG | AGTAA      |
| MAM1_SP134 | CAAGGAATGA | CACAGGACCC | TATGAGTGTA | GAACCTGGAA | CCAAGTGAAT |
| MAST_A016_ | GCCCCCCGTA | GTGACCCATT | CATCCTGAAT | GTTCTCTGTG | AGTAA      |
| SAV1_SE210 | CAAGGAATGA | CACAGGACCC | TATGAGTGTA | GAACCTGGAA | CCAAGTGAAT |
|            | GCCCCCCGTA | GTGACCCATT | CATCCTGAAT | GTTCTCTGTG | AGTAA      |
|            | CAAGGAATGA | CACAGGACCC | TATGAGTGTA | GAACCTGGAA | CCAAGTGAAT |
|            | GCCCCCCGTA | GTGACCCATT | CATCCTGAAT | GTTCTCTGTG | AGTAA      |

1 1 1 1 1  
5 99

|            |            |            |            |            |            |
|------------|------------|------------|------------|------------|------------|
| ASIAN2_Ema | TTAGAAGTGA | GGCGCTACCC | AGGAAGGAGA | GAGCCCTCTG | TAGCCCAGGA |
| FOR_DS1535 | GAGTTCTGGC | TTCTCAGAG  | CCCCTYATCC | TCCTTCAAAC | CTCAGCTTT  |
| MAM1_SP134 | TTAGAAGTGA | GGCGCTACCC | AGGAAGGAGA | GAGCCCTCTG | TAGCCCAGGA |
| MAST_A017_ | GAGTTCTGGC | TTCTCAGAG  | CCCCTCATCC | TCCTTCAAAC | CTCAGCTTT  |
| SAV1_SE210 | TTAGAAGTGA | GGCGCTACCC | AGGAAGGAGA | GAGCCCTCTG | TAGCCCAGGA |
|            | GAGTTCTGGC | TTCTCAGAG  | CCCCTCATCC | TCCTTCAAAC | CTCAGCTTT  |
|            | TTAGAAGTGA | GGCGCTACCC | AGGAAGGAGA | GAGCCCTCTG | TAGCCCAGGA |
|            | GAGTTCTGGC | TTCTCAGAG  | CCCCTCATCC | TCCTTCAAAC | CTCAGCTTT  |

1 1 1 1 1  
5 91

|            |            |            |            |            |            |
|------------|------------|------------|------------|------------|------------|
| ASIAN2_Ema | TGGGTGGAGG | TCCAGGAGAG | CTTTTAAAAG | GCCAAGGTTA | TAGGCTCCAT |
|            | TAGTGCAAAG | TTCTCAACTG | CCTCAGAATA | CAGTCTGAGG | A          |
| FOR_DS1535 | TGGGTGGAGG | TCCAGGAGAG | CTTTTAAAAG | GCCAAGGTTA | TAGGCTCCAT |
|            | TAGTGCAAAG | TTCTCAACTG | CCTCAGAATA | CAGTCTGGGG | A          |
| MAM1_SP134 | TGGGTGGAGG | TCCAGGAGAG | CTTTTAAAAG | GCCAAGGTTA | TAGGCTCCAT |
|            | TAGTGCAAAG | TTCTCAACTG | CCTCAGAATA | CAGTCTGAGG | A          |
| MAST_A019_ | TGGGTGGAGG | CCCAGGAGAG | CTTTTAAAAG | GCCAAGGTTA | TAGGCTCCAT |
|            | TAGTGCAAAG | TTCTCAACTG | CCTCAGAATA | CAGTCTGAGG | A          |
| SAV1_SE210 | TGGGTGGAGG | TCCAGGAGAG | CTTTTAAAAG | GCCAAGGTTA | TAGGCTCCAT |
|            | TAGTGCAAAG | TTCTCAACTG | CCTCAGAATA | CAGTCTGAGG | A          |

1 1 1 1 1  
5 106

|            |            |            |            |            |            |
|------------|------------|------------|------------|------------|------------|
| ASIAN2_Ema | GACTAGCATT | TCTCAAAATG | TGAGTTTTGA | CCCATTAGAG | TGTCATGAAA |
|            | TCAACTCAGT | GAGTTGTGAC | CAAAATTTTT | AGAACAAAAT | -GGAATTTAG |
|            | CAGAAA     |            |            |            |            |
| FOR_DS1535 | GACTAGCATT | TCTCAAAATG | TGAGTTTTGA | CCCATTAGAG | TGTCATGAAA |
|            | TCAACTCAGT | GAGTTGTGAC | CAAAATTTTT | AGAACAAAAT | -GGAATTTAG |
|            | CAGAAA     |            |            |            |            |
| MAM1_SP134 | GACTAGCMTT | TCTCAAAATG | TGAGTTTTGA | CCCATTAGAG | TGTCATGAAA |
|            | TCAACTCAGT | GAGTTGTGAC | CAAAATTTTT | AGAACAAAAT | -GGAATTTAG |
|            | CAGAAA     |            |            |            |            |
| MAST_A021_ | GATTAGCATT | TTTCAAAATG | TGAGTTTTGA | CCCATTAGAG | TGTCATGAAA |
|            | TCAACTCAGT | GAGTTGTGAC | CAAAATTTTT | AGAACAAAAA | CGGAATTTAA |
|            | CAAAAA     |            |            |            |            |
| SAV1_SE210 | GACTAGCATT | TCTCAAAATG | TGAGTTTTGA | CCTATTAGAG | TGTCATGAAA |
|            | TCAACTCAGT | GAGTTGTGAC | CAAAATTTTT | AGAACAAAAT | -GGAATTTAG |
|            | CAGAAA     |            |            |            |            |

1 1 1 1 1  
5 113

|            |            |            |            |            |            |
|------------|------------|------------|------------|------------|------------|
| ASIAN2_Ema | TCATTGTCTG | GATTGCTATT | TTATTACCCA | TTAAGTGGTT | AACAGCTTTG |
|            | GTGTTTAAAA | AAGTAATGAG | TGAAGCGTAT | AACCAATCAA | AAA-TGATTG |
|            | TGAGCACCAG | GGA        |            |            |            |
| FOR_DS1535 | TCATTGTCTG | GATTGCTATT | TTATTACCCA | TTAAGTGGTT | AACAGCTTTG |
|            | GTGTTTAAAA | AAGTAATGAG | TGAAGCGTAT | AACCAATCAA | AAA-TGATTG |
|            | TGAGCACCAG | GGA        |            |            |            |
| MAM1_SP134 | TCATTGTCTG | GATTGCTATT | TTATTACCCA | TTAAGTGGTT | AACAGCTTTG |
|            | GTGTTTAAAA | AAGTAATGAG | TGAAGCGTAT | AACCAATCAA | AAA-TGATTG |
|            | TGAGCACCAG | GGA        |            |            |            |
| MAST_A026_ | TCATTGTCTG | GATTGCTATT | TTATTACCCA | TTAAGTGGTT | AACAGCTTTG |
|            | GTGTTTAAAA | AAGTAATGAG | TGAAGTGTAT | AACCAATCAA | AAAATGATTG |
|            | TGAGCACCAG | GGA        |            |            |            |
| SAV1_SE210 | TCATTGTCTG | GATTRCTATT | TTATTACCCA | TTAAGTGGTT | AACAGCTTTG |
|            | GTGTTTAAAA | AAGTAATGAG | TGAAGCRTAT | AACCAATCAA | AAA-TGATTG |
|            | TGAGCACCAG | GGA        |            |            |            |

1 1 1 1 1  
5 109

|            |             |             |            |            |            |
|------------|-------------|-------------|------------|------------|------------|
| ASIAN2_Ema | TCATTTTCATT | TATCCGTAAT  | CAGTGTCCGC | GGAAGCTGCA | GTCAGGAAAT |
|            | CAAATCTGCT  | GCAAAAAGACC | TCTTTAAAAT | GGTAAAAAGC | AAAGATGTCA |
|            | CTTTAAGGA   |             |            |            |            |
| FOR_DS1535 | TCATTTTCATT | TATCCGTAAT  | CAGTGTCCGC | GGAAGCAGCA | GTCAGGAAAT |
|            | CAAATCTGCT  | GCAAAAAGACC | TCTTTAAAAT | GGTAAAAWGC | AAAGATGTCA |
|            | CTTTAAGGA   |             |            |            |            |
| MAM1_SP134 | TCATTTTCATT | TATCCGTAAT  | CAGTGTCCGC | GGAAGCAGCA | GTCAGGAAAT |
|            | CAAATCTGCT  | GCAAAAAGACC | TCTTTAAAAT | GGTAAAAAGC | AAAGATGTCA |
|            | CTTTAAGGA   |             |            |            |            |
| MAST_A033_ | TCATTTTCATT | TATCCGTAAT  | CAGTGTCCGC | GGAAGCAGCA | GTCAGGAAAT |
|            | CAAATCTGCT  | GCAAAAAGACC | TTTTTAAAAT | GGTAAAAAGC | AAAGATGTCA |
|            | CTTTAAGGA   |             |            |            |            |
| SAV1_SE210 | TCATTTTCATT | TATCCGTAAT  | CAGTGTCCGC | GGAAGCAGCA | GTCAGGAAAT |
|            | CAAATCTGCT  | GCAAAAAGACC | TCTTTAAAAT | GGTAAAAAGC | AAAGATGTCA |
|            | CTTTAAGGA   |             |            |            |            |

1 1 1 1 1  
5 92

|            |            |            |            |            |            |
|------------|------------|------------|------------|------------|------------|
| ASIAN2_Ema | CTCACCTCTC | CCTCCTTAAC | CACTCCTGCC | CCCACAGGCC | TCTCTAGCTA |
|            | AGCCCTGGCA | CTCTCCCCTG | CCCAGGAAGG | CCAGCCCACT | CT         |
| FOR_DS1535 | CTCACCTCTC | CCTCCTTAAC | CGCTCCTGCC | CCCACAGGCC | TCTCTAGCTA |
|            | AGCCCTGGCA | CTCTCCCCTG | CCCAGGAAGG | CCAGCCCACT | CT         |
| MAM1_SP134 | CTCACCTCTC | CCTCCTTAAC | CACTCCTGCC | CCCACAGGCC | TCTCTAGCTA |
|            | AGCCCTGGCA | CTCTCCCCTG | CCCAGGAAGG | CCAGCCCACT | CT         |
| MAST_A034_ | CTCACCTCTC | CCTCCTTAAC | CGCTCCTGTC | CCCACAGGCC | TCTCTAGCTA |
|            | AGCCCTGGTA | CTCTCCCCTG | CCCAGGAAGG | CCAGCCCACT | CT         |
| SAV1_SE210 | CTCACCTCTC | CCTCCTTAAC | CGCTCCTGCC | CCCACAGGCC | TCTCTAGCTA |
|            | AGCCCTGGCA | CTCTCCCCTG | CCCAGGAAGG | CCAGCCCACT | CT         |

1 1 1 1 1  
5 103

|            |            |            |            |            |            |
|------------|------------|------------|------------|------------|------------|
| ASIAN2_Ema | TGCTGTTCTG | GGTTCCTAGA | TTGTCATCTG | TGTCTGTTTC | ACATGGTTTC |
|            | TTGGTTCCTT | GTTGTAGGGG | AACAGGGTGG | TGTGTGTGAC | TAAGCCACCA |
|            | TTT        |            |            |            |            |
| FOR_DS1535 | TGCTGTTCTG | GGTTCCTAGA | TTGTCATCTG | TGTCTGTTTC | ACATGGTTTC |
|            | TTGGTTCCTT | GTTGTAGGGG | AACAGGGTGG | TGTGTGTGAC | TAAGCCACCA |
|            | TTT        |            |            |            |            |
| MAM1_SP134 | TGCTGTTCTG | GGTTCCTAGA | TTGTCATCTG | TGTCTGTTTC | ACATGGTTTC |
|            | TTGGTTCCTT | GTTGTAGGGG | AACAGGGTGG | TGTGTGTGAC | TAAGCCACCA |
|            | TTT        |            |            |            |            |
| MAST_A036_ | TGCTGTTCTG | GGTTCCTAGA | TTGTCATCTG | TGTCTGTTTC | ACATAGTTTC |
|            | TTGGTTCCTT | GTTGTAGGGG | AACAGGGTGG | TGTGTGTGAC | TAAGCCACCA |
|            | TTT        |            |            |            |            |
| SAV1_SE210 | TGCTGTTCTG | GGTTCCTAGA | TTGTCATCTG | TGTCTGTTTC | ACATGGTTTC |
|            | TTGGTTCCTT | GTTGTAGGGG | AACAGGGTGG | TGTGTGTGAC | TAAGCCACCA |
|            | TTT        |            |            |            |            |

1 1 1 1 1  
5 91

|            |            |            |            |            |            |
|------------|------------|------------|------------|------------|------------|
| ASIAN2_Ema | TCACATGAGG | ACACTCCTAT | TCTCTGCCCT | TCAAATTCAT | TCTGACCAAG |
|            | AGAGACGCAC | ACAACGCAGC | TCAGAAATGC | TTTAAGATTG | T          |
| FOR_DS1535 | TCACATGAGG | ACACTCCTAT | TCTCTGCCCT | TCAAATTCAT | TCTGACCAAG |
|            | AGAGACGCAC | ACAACGCAGC | TCAGAAATGC | TTTAAGATTG | T          |
| MAM1_SP134 | TCACATGAGG | ACACTCCTAT | TCTCTGCCCT | TCAAATTCAT | TCTGACCAAG |
|            | AGAGACACAC | ACAACGCAGC | TCAGAAATGC | TTTAAGATTG | T          |
| MAST_A038_ | TTATATGAGG | ACACTCCTAT | TCTCTGCTCT | TCAAATTCAT | TCTGACCAAG |
|            | AGAGACGCAC | ACAACGCAGC | TCAGAAATGC | TTTAAGATTG | T          |
| SAV1_SE210 | TCACATGAGG | ACACTCCTAT | TCTCTGCCCT | TCAAATTCAT | TCTGACCAAG |
|            | AGAGACGCAC | ACAACGCAGC | TCAGAAATGC | TTTAAGATTG | T          |

1 1 1 1 1  
5 98

|            |            |            |            |            |            |
|------------|------------|------------|------------|------------|------------|
| ASIAN2_Ema | AAAAGACCAT | GGGAACCACT | GAACCAGTAT | AACTTCTGGR | ATGAAGGGAC |
|            | ATCAATAAAT | GCTCCTCACA | GAGCTTCACT | GAGGTCATTC | TGGTCTTT   |
| FOR_DS1535 | AAAAGACCAT | GGGAACCACT | GAACCAGTAT | AACTTCTGGA | ATGAAGGGAC |
|            | ATCAATAAAT | GCTCCTCACA | GAGCTTCACT | GAGGTCATTC | TGGTCTTT   |
| MAM1_SP134 | AAAAGACCAT | GGGAACCACT | GAACCAGTAT | AACTTCTGGA | ATGAAGGGAC |
|            | ATCAATAAAT | GCTCCTCACA | GAGCTTCACT | GAGGTCATTC | TGGTCTTT   |
| MAST_A042_ | AAAAGATCAT | GGGAACCACT | GAACCAGTAT | AACTTCTGGA | ATGAAGGGAC |
|            | ATCAATAAAT | GCTCCTCACA | GAGCTTCACT | GAGGTCATTC | TGGTCTTT   |
| SAV1_SE210 | AAAAGACCAT | GGGAACCACT | GAACCAGTAT | AACTTCTGGA | ATGAAGGGAC |
|            | ATCAATAAAT | GCTCCTCACA | GAGCTTCACT | GAGGTCATTC | TGGTCTTT   |

1 1 1 1 1  
5 96

|            |            |            |            |            |            |
|------------|------------|------------|------------|------------|------------|
| ASIAN2_Ema | TACCAAATCT | GGCTTGGCAC | CATTTGCTTA | GTAGAAATCA | ATTCGGAATC |
|            | AGAAGGGCCG | GTTTTGCTAA | TCTTGTACTG | TAAGCCGTAA | GATGAG     |
| FOR_DS1535 | TACCAAATCT | GGCTTGGCAC | CATTTGCTTA | GTAGAAATCA | ATTCGGAATC |
|            | AGAAGGGCCG | GTTTTGCTAA | TCTTGTACTG | TAAGCCGTAA | GATGAG     |
| MAM1_SP134 | TACCAAATCT | GGCTTGGCAC | CATTTGCTTA | GTAGAAATCA | ATTCGGAATC |
|            | AGAAGGGCCG | GTTTTGCTAA | TCTTGTACTG | TAAGCCGTAA | GATGAG     |

|            |            |            |            |            |            |
|------------|------------|------------|------------|------------|------------|
| MAST_A044_ | TACTAAATCT | GGCTTGGCAC | CATTTGCTTA | GTAGAAATCA | ATTCAGAACC |
| SAV1_SE210 | AGAAGGGCTG | GTTTTGCTAA | TCTTGTACTG | TAAGCCGTAA | GATGAG     |
|            | TACCAAATCT | GGCTTGGCAC | CATTTGCTTA | GTAGAAATCA | ATTCGGAATC |
|            | AGAAGGGCCG | GTTTTGCTAA | TTTTGTACTG | TAAGCCGTAA | GATGAG     |

1 1 1 1 1  
5 102

|            |            |            |            |            |             |
|------------|------------|------------|------------|------------|-------------|
| ASIAN2_Ema | AAGCTACTTG | GCTGATTGGC | TGGAAGAGAA | CCATATTTGT | GCCAGTTCCA  |
|            | AAGAAAGGTG | ATCCAACAGA | GTGAGGAAAT | TATTGAACAA | TATCATTAAAT |
|            | AT         |            |            |            |             |
| FOR_DS1535 | AAGCTACTTG | GCTGATTGGC | TGGAAGAGAA | CCATATTTGT | GCCAGTTCCA  |
|            | AAGAAAGGTG | ATCCAACAGA | GTGAGGAAAT | TATTGAACAA | TATCATTAAAT |
|            | AT         |            |            |            |             |
| MAM1_SP134 | AAGCTACTTG | GCTGATTGKC | TGGAAGAGAA | CCATATTTGT | GCCAGTTCCA  |
|            | AAGAAAGGTG | ATCCAACAGA | GTGAGGAAAT | TATTGAACAA | TATCATTAAAT |
|            | AT         |            |            |            |             |
| MAST_A046_ | AAGCTACTTG | GCTGATTGGC | TGGAAGAGAA | CCCTATTTGT | GCCAGTTCCA  |
|            | AAGAAAGGTG | ATCCAACAGA | GTGAGGAAAT | TATTGAACAA | TATCATTAAAT |
|            | AT         |            |            |            |             |
| SAV1_SE210 | AAGCTACTTG | GCTGATTGGC | TGGAAGAGAA | CCATATTTGT | GCCAGTTCCA  |
|            | AAGAAAGGTG | ATCCAACAGA | GTGAGGAAAT | TATTGAACAA | TATCATTAAAT |
|            | AT         |            |            |            |             |

1 1 1 1 1  
5 92

|            |            |            |            |            |            |
|------------|------------|------------|------------|------------|------------|
| ASIAN2_Ema | ACATTCATCA | GCCAGTCTAG | TCCCCCAGTG | GACAATCCTG | CTACGCGTGC |
|            | TAGTGACTGT | TCCAGCGGGG | GG-TTGTAGG | GGCCTACAGG | GG         |
| FOR_DS1535 | ACATTCATCA | GCCAGTCTAG | TCCCCCAGTG | GACAATCCTG | CTGCAYGTGC |
|            | TAGTGACTGT | TCCAGSGGGG | GG-TTGTAGG | GGCCTACAGG | GG         |
| MAM1_SP134 | ACATTCATCA | GCCAGTCTAG | TCCCCCAGTG | GACAATCCTG | CTACACGTGC |
|            | TAGTGACTGT | TCCAGCGGGG | GG-TTGTAGG | GGCCTACAGG | GG         |
| MAST_A047_ | ACATTCATCA | GCCAGTCTAG | TCCCCCAGTG | GACAATCCTG | CTGCATGTGC |
|            | TAGTGACTGT | TCCGGCTGGG | GG-CTGTAGG | GGC-TACAGG | GG         |
| SAV1_SE210 | ACATTCATCA | GCCAGTCTAG | TCCCCCAGTG | GACAATCCTG | CTGCACGTGC |
|            | TAGTGACTGT | TCCAGCGGGG | GGTGTAGG   | GGCCTACAGG | GG         |

1 1 1 1 1  
5 96

|            |            |            |            |            |            |
|------------|------------|------------|------------|------------|------------|
| ASIAN2_Ema | CACTTAATGT | CCCACAAAGG | AGCTGTTGGC | CTTGCCCTGG | CCCTGGCTCC |
|            | TGTGTTTGTC | CAAACAGCAC | AGACTCTYTT | CTGTTTCTTG | TCCACA     |
| FOR_DS1535 | CACTTAATGT | CCCACAAAGG | AGCTGTTGGC | CTTGCCCTGG | CCCTGGCTCC |
|            | TGTGTTTGTC | CAAACAGCAC | AGACTCTCTT | CTGTTTCTTG | TCCACA     |
| MAM1_SP134 | CACTTAATGT | CCCACAAAGG | AGCTGTTGGC | CTTGCCCTGG | CCCTGGCTCC |
|            | TGTGTTTGTC | CAAACAGCAC | AGACTCTCTT | CTGTTTCTTG | TCCACA     |
| MAST_A048_ | CATTTAATGT | CCTACAAAGG | AGCTGTTGGC | TTTGCCCTGG | CTCTGGCTCC |
|            | TGTGTTTGTC | CAAACAGCAC | AGACTCTCTT | CTGTTTCTTG | TCCACA     |
| SAV1_SE210 | CACTTAATGT | CCCACAAAGG | AGCTGTTGGC | CTTGCCCTGG | CCCTGGCTCC |
|            | TGTGTTTGTC | CAAACAGCAC | AGACTCTCTT | CTGTTTCTTG | TCCACA     |

1 1 1 1 1  
5 97

|            |            |            |            |            |            |
|------------|------------|------------|------------|------------|------------|
| ASIAN2_Ema | GGAAGGGCCC | CAAAGGCTG  | TCATGGGGCT | TGGGGCACAG | GGCAGTGATT |
|            | CACTCAGTGT | CCTGTCCTGG | GAAGGCTCTG | TGACAGTGCT | CTCAATG    |
| FOR_DS1535 | GGAAGGGCCC | CAAAGGCTG  | TCATGGGGCT | TGGGGCACAG | GGCAGTGATT |
|            | CACTCAGTGT | CCTGTCCTGG | GAAGGCTCTG | TGACAGTGCT | CTCAACG    |
| MAM1_SP134 | GGAAGGGCCC | CAAAGGCTG  | TCATGGGGCT | TGGGGCACAG | GGCAGTGATT |
|            | CACTCAGTGT | CCTGTCCTGG | GAAGGCTCTG | TGACRGTGCT | GTCAATG    |
| MAST_A050_ | GGAAGGGCCC | CAAAGGCTG  | TCATGGGGCT | TGGGGCACAG | GGCAGTGATT |
|            | CACTCAGTGT | CCTGTCCTGG | GAAGGCTCTG | TGACAGTGCT | TTCAATG    |
| SAV1_SE210 | GGAAGGGCCC | CAAAGGCTG  | TCATGGGGCT | TGGGGCACAG | GGCAGTGATT |
|            | CACTCAGTGT | CCTGTCCTGG | GAAGGCTCTG | TGACAGTGCT | CTCAATG    |

1 1 1 1 1  
5 91

|            |             |            |            |            |            |
|------------|-------------|------------|------------|------------|------------|
| ASIAN2_Ema | GGCTGGGCCT  | TTCCAGGAGG | GCTCTCCAAG | TATTGCCTTT | CCGAGTATTC |
|            | ACAGCCAACCT | TCCCCACCA  | GTCATGAGTT | TTTCCAAGAC | T          |

|            |            |            |            |            |            |
|------------|------------|------------|------------|------------|------------|
| FOR_DS1535 | GGCTGGGCCT | TTCCAGGAGG | GCTCTCCAAG | TATTGCCTTT | CCGAGTATTC |
|            | ACAGCCAAC  | TCCCCACCA  | GTCATGAGTT | TTTCCAAGAC | T          |
| MAM1_SP134 | GGCTGGGCCT | TTCCAGGAGG | GCTCTCCAAG | TATTGCCTTT | CCGAGTATTC |
|            | CCAGCCAAC  | TCCCCACCA  | GTCATGAGTT | TTTCCAAGAC | T          |
| MAST_A052_ | GGCTGGGCCT | TTCCAGGAGG | GCTCTCCAAG | TATTGCCTTT | CCGAGTATTC |
|            | ACAGCCAAC  | TCCCCACCA  | GTCATGAGTT | TTTCCAAAAC | T          |
| SAV1_SE210 | GGCTGGGCCT | TTCCAGGAGG | GCTCTCCAAG | TATTGCCTTT | CCGAGTATTC |
|            | ACAGCCAAC  | TCCCCACCA  | GTCATGAGTT | TTTCCAAGAC | T          |

1 1 1 1 1  
5 102

|            |            |            |            |            |             |
|------------|------------|------------|------------|------------|-------------|
| ASIAN2_Ema | TTTATTCCAT | TCATATTCTC | CCTGGTCTCA | TCATCAAATC | ATGCGTTGGG  |
|            | GGATGTTGAA | TATTTACAGT | TGCTTTTGTA | AAGAGTTTGA | GTTGTTTTGG  |
|            | CT         |            |            |            |             |
| FOR_DS1535 | TTTATTCCAT | TCATATTCTC | CCTGGTCTCA | TCATCAAATC | ATGCGTTGGG  |
|            | GGATGTTGAA | TATTTACAGT | TGCTTTTGTA | AAGAGTTTGA | GTTGTTTTGG  |
|            | CT         |            |            |            |             |
| MAM1_SP134 | TTTATTCCAT | TCATATTCTC | CCTGGTCTCA | TCATCAAATC | ATGCGTTGGG  |
|            | GGATGTTGAA | TATTTACAGT | TGCTTTTGTA | AAGAGTTTGA | GTTGTTTTGG  |
|            | CT         |            |            |            |             |
| MAST_A054_ | TTTATTCTCT | TCATATTCTC | CCTGGTCTCA | TCATCAAATC | ATGCATTGGG  |
|            | GGATGTTGAA | TATTTACAGT | TGCTTTTGTA | AAGAGTTTGA | GTTATTTTTGG |
|            | CT         |            |            |            |             |
| SAV1_SE210 | TTTATTCCAT | TCATATTCTC | CCTGGTCTCA | TCATCAAATC | ATGCGTTGGG  |
|            | GGATGTTGAA | TATTTACAGT | TGCTTTTGTA | AAGAGTTTGA | GTTGTTTTGG  |
|            | CT         |            |            |            |             |

1 1 1 1 1  
5 96

|            |            |            |            |            |            |
|------------|------------|------------|------------|------------|------------|
| ASIAN2_Ema | TAGTTTTACA | AGGAAATGAG | AAATTTGGTA | GCTGGTGGTA | TTTGAATTTT |
|            | GTTGGAAAGG | AGGCTCTCAC | CACAAAAGGT | TGTGCCTTTG | ATGTGT     |
| FOR_DS1535 | TAGTTTTACA | AGGAAATGAG | AAATTTGGTA | GCTGGTGGTA | TTTGAATTTT |
|            | GTTGGAAAGG | AGGCTCTCAC | CACAAAAGGT | TGTGCCTTTG | ATGTGT     |
| MAM1_SP134 | TAGTTTTACA | AGGAAATGAG | AAATTTGGTA | GCTGGTGGTA | TTTGAATTTT |
|            | GTTGGAAAGG | AGGCTCTCAC | CACAAAAGGT | TGTGCCTTTG | ATGTGT     |
| MAST_A056_ | TAGTTTTACA | AGGAAATGAG | AAATTTGGTA | GCTGGTGGTA | TTTGAATTT- |
|            | GTTGGAAAGG | AGGCTCTCAC | CACAAAAGGT | TGTGCCTTTG | ATGTGT     |
| SAV1_SE210 | TAGTTTTACA | AGGAAATGAG | AAATTTGGTA | GCTGGTGGTA | TTTGAATTTT |
|            | GTTGGAAAGG | AGGCTCTCAC | CACAAAAGGT | TGTGCCTTTG | ATGTGT     |

1 1 1 1 1  
5 99

|            |            |            |            |            |            |
|------------|------------|------------|------------|------------|------------|
| ASIAN2_Ema | AGAGTTGATT | CTTTGTACCC | CATCATAAGC | AAACAACAGG | CAGTCCATAT |
|            | GGTGCCTTCT | GGATGGGTTT | GGAGGGGGGA | CAGCCTGGGA | AGGACTGCG  |
| FOR_DS1535 | AGAGTTGATT | CTTTGTAYCC | CATCATAAGC | AAACAACAGG | CAGTCCATAT |
|            | GGTGCCTTCT | GGATGGGTTT | GGAGGGGGGA | CAGCCTGGGA | AGGACTGCG  |
| MAM1_SP134 | AGAGTTGATT | CTTTGTACCC | CATCATAAGC | AAACAACAGG | CAGTCCATAT |
|            | GGTGCCTTCT | GGATGGGTTT | GGAGGGGGGA | CAGCCTGGGA | AGGACTGCG  |
| MAST_A057_ | AGAGTTGATT | CTTTGTACCC | CATCATAAGC | AAACAACAAG | CAGTCCATAT |
|            | GGTGCCTTCT | GGATGGGTTT | AAAGGGGGGA | CAGCCTGGGA | AGGACTGCG  |
| SAV1_SE210 | AGAGTTGATT | CTTTGTACCC | CATCATAAGC | AAACAACAGG | CAGTCCATAT |
|            | GGTGCCTTCT | SGATGGGTTT | GGAGGGGGGA | CAGCCTGGGA | AGGACTGCG  |

1 1 1 1 1  
5 127

|            |            |            |            |            |            |
|------------|------------|------------|------------|------------|------------|
| ASIAN2_Ema | TAGTCAGGCT | TTGC-CTAAA | AGTTCAGT-A | AA-CATTT-G | ATATTGGGTT |
|            | CTTTGGCTAG | GAAGGAAAGG | AAATGGAAGG | GAACGGAAGG | CAAGGCAAGG |
|            | GAAGTAAAAC | AAAGAAAATG | GAAGGGA    |            |            |
| FOR_DS1535 | TAGTCAGGCT | TTGC-CTAAA | AGTTCAGT-A | AA-CATTT-G | ATATTGGGTT |
|            | CTTTGGCTAG | GAAGGAAAGG | AAATGGAAGG | GAAGGGAAGG | CAAGGCAAGG |
|            | GAAGTAAAAC | AAAGAAAATG | GAAGGGA    |            |            |
| MAM1_SP134 | TASTCAGGCT | TTGC-CTAAA | AGTTCAGT-A | AA-CATTT-G | ATATTGGGTT |
|            | CTTTGGCTAG | GAAGGAAAGG | AAATGGAAGG | GAAGGGAAGG | CAAGGCAAGG |
|            | GAAGTAAAAC | AAAGAAAATG | GAAGGGA    |            |            |
| MAST_A069_ | TAGTCAGGCT | TTGCATTACA | AGTTCAGTTA | AAACATTTTG | ATATTGGGTT |
|            | CTTTGGCTAG | GAAGGAAAGG | AAATGGAAGG | GAAGGGAAGG | CAAGGCAAGG |
|            | GAAGTAAAAC | AAAGAAAATG | GAAGGGA    |            |            |

|            |                                       |                                        |                                     |                          |                          |
|------------|---------------------------------------|----------------------------------------|-------------------------------------|--------------------------|--------------------------|
| SAV1_SE210 | TAGTCAGGCT<br>CTTTGGCTAG<br>GAAGTGAAC | TTGC-CTAAA<br>GAAGGAAAGG<br>AAAGAAAATG | AGTTCAGT-A<br>AAATGGAAGG<br>GAAGGGA | AA-CATTT-G<br>GAAGGGAAGG | ATATTGGGTT<br>CAAGGCAAGG |
|------------|---------------------------------------|----------------------------------------|-------------------------------------|--------------------------|--------------------------|

1 1 1 1 1  
5 104

|            |                                 |                          |                          |                          |                          |
|------------|---------------------------------|--------------------------|--------------------------|--------------------------|--------------------------|
| ASIAN2_Ema | CCTATTAGCT<br>TGCCCCACT<br>CTAA | AACTAAGAAA<br>CACCCATTGT | CTATTCAAAA<br>AGAGCCTCTA | -GGGTGGAGC<br>TGGGATTTCT | ATTCCTATGA<br>ACTGGCCTTC |
| FOR_DS1535 | CCTATTAGCT<br>TGCCCCACT<br>CTAA | AACTAAGAAA<br>CACCCATTGT | CTACTCAAAA<br>AGAGCCTCTA | -GGGTGGAGC<br>TGGGATTTCT | ATTCCTATGA<br>ACTGGCCTTC |
| MAM1_SP134 | CCTATTAGCT<br>TGCCCCACT<br>CTAA | AACTAAGAAA<br>CACCCATTGT | CTACTCAAAA<br>AGAGCCTCTA | -GGGTGGAGC<br>TGGGATTTCT | ATTCCTATGA<br>ACTGGCCTTC |
| MAST_A071_ | TCTATTAGCT<br>TGCCCCACT<br>CTAA | AACTAAGAAA<br>CACCCATTGT | CTACTCAAAA<br>AGAGCCTCTA | AGGGTGGAGC<br>TGGGATTTCT | ATTCCTATGA<br>ACTGGCCTTC |
| SAV1_SE210 | CCTATTAGCT<br>TGCCCCACT<br>CTAA | AACTAAGAAA<br>CACCCATTGT | CTACTCAAAA<br>AGAGCCTCTA | -GGGTGGAGC<br>TGGGATTTCT | ATTCCTATGA<br>ACTGGCCTTC |

1 1 1 1 1  
5 110

|            |                                        |                          |                          |                          |                          |
|------------|----------------------------------------|--------------------------|--------------------------|--------------------------|--------------------------|
| ASIAN2_Ema | TGGGAATCAT<br>ATGTTCTACA<br>AGAGTGGCCA | GGTCCCAGGG<br>TCCAACCTTG | TCAATTGGCA<br>GTGAGTGGCA | AAACAAAATT<br>TCTGGTGTCT | TGTAAAGAAA<br>TAAAATCTTG |
| FOR_DS1535 | TGGGAATCAT<br>ATGTTCTACA<br>AGAGTGGCCA | GGTCCCAGGG<br>TCCAACCTTG | TCAATTGGCA<br>GTGAGTGGCA | AAACAAAATT<br>TCTGGTGTCT | TGTMAAGAAA<br>TAAAATCTTG |
| MAM1_SP134 | TGGGAATCAT<br>ATGTTCTACA<br>AGAGTGGCCA | GGTCCCAGGG<br>TCCAACCTTG | TCAATTGGCA<br>GTGAGTGGCA | AAACAAAATT<br>TCTGGTGTCT | TGTAAAGAAA<br>TAAAATCTTG |
| MAST_A075_ | TGGGAATCAT<br>ATGTTCTACA<br>CAAGGGACCA | GGTCCCAGGG<br>TCCAACCTTG | TCAATTTGCA<br>GTGAGTGGCA | AAACAAAATT<br>TCTAAGGTCT | TGTAAAGAAA<br>TAAATGCTAG |
| SAV1_SE210 | TGGGAATCAT<br>ATGTTCTACA<br>AGAGTGGCCA | GGTCCCAGGG<br>TCCAACCTTG | TCAATTGGCA<br>GTGAGTGGCA | AAACAAAATT<br>TCTGGTGTCT | TGTAAAGAAA<br>TAAAATCTTG |

1 1 1 1 1  
5 127

|            |                                          |                                       |                                     |                          |                          |
|------------|------------------------------------------|---------------------------------------|-------------------------------------|--------------------------|--------------------------|
| ASIAN2_Ema | ATGGGAGACT<br>CTGTGATTCT<br>TTTTTTTTT    | TGCCACATGC<br>CTGGAAAAC<br>TTTTCTA-CT | ACCCAAATAA<br>GGAAGTCAGA<br>GTTGTCT | CTGCTTCTAA<br>GGAAAGAGAA | CGCACCATCC<br>ATGTTGTTTT |
| FOR_DS1535 | ATGGGAGACT<br>CTGTGATTCT<br>TTTTTTTTT    | TGCCACATGC<br>CTGGAAAAC<br>TTTTTTG-CT | ACCCAAATAA<br>GGAAGTCAGA<br>GTTGTCT | CTGCTTCTAA<br>GGAAAGAGAA | CGCACCATCC<br>ATGTTKTKT  |
| MAM1_SP134 | ATGGGAGACT<br>CTGTGATTCT<br>TTTTTTT---   | TGCCACATGC<br>CTGGAAAAC<br>-----GTCT  | ACCCAAATAA<br>GGAAGTCAGA<br>GTTGTCT | CTGCTTCTAA<br>GGAAAAGAA  | CGCACCATCC<br>ATGTTGTTTT |
| MAST_A076_ | ATGGGAGACT<br>CTGTGATTCT<br>TTTTTTT---   | TGCCACATGC<br>CTGGAAAAC<br>-----T     | ACCCAAATAA<br>GGAAGTCAGA<br>TTTGTCT | CTGCTTTTAA<br>GGAAAGAGAA | CGCACCATCC<br>ATGTTTATTT |
| SAV1_SE210 | ATGGGAGACT<br>CTGTGATTCT<br>TTTTTTT----- | TGCCACATGC<br>CTGGAAAAC<br>-----G-CT  | ACCCAAATAA<br>GGAAGTCAGA<br>GTTGTCT | CTGCTTCTAA<br>GGAAAGAGAA | CGCACCATCC<br>ATGTTGTTTT |

1 1 1 1 1  
5 107

|            |                                     |                          |                          |                         |                          |
|------------|-------------------------------------|--------------------------|--------------------------|-------------------------|--------------------------|
| ASIAN2_Ema | AGGGACCTTG<br>TTTGGAAATC<br>GACGCTT | TAATTTTTGA<br>TTTCCGCTA  | GAGGGTGGAA<br>AAGCCAAATT | TGCTTGACTT<br>TCTATATTC | CCAGAATCTG<br>ATAATCTAAA |
| FOR_DS1535 | AGGGACCTTG<br>TTTGGAAATC<br>GATGCTT | TAATTTTTGA<br>TTTCCAGCTA | GAGGGTGGAA<br>AAGCCAAATT | TGCTTGACTT<br>TCTATATTC | CCAGAATCTG<br>ATAATCTAAA |
| MAM1_SP134 | AGGGACCTTG                          | TAATTTTTGA               | GAGGGTGGAA               | TGCTTGACTT              | CCAGAATCTG               |

|            |                                     |                          |                          |                          |                          |
|------------|-------------------------------------|--------------------------|--------------------------|--------------------------|--------------------------|
|            | TTTGGAAATC<br>GACGCTT               | TTTCCCGCTA               | AAGCCAAATT               | TCTATATTTT               | ATAATCTAAA               |
| MAST_A077_ | AGGGACCTTG<br>TTTGGAAATC<br>GACGCTT | TAATTTTTGA<br>TTTCCAGCTA | GAGGGTGGGA<br>AAGCCAAATT | TGCTTGACTT<br>TCTATATTTT | CCAGAATCTG<br>ATAATCTAAA |
| SAV1_SE210 | AGGGACCTTG<br>TTTGGAAATC<br>GACGCTT | TAATTTTTGA<br>TTTCCAGCTA | GAGGGTGGAA<br>AAGCCAAATT | TGCTTGACTT<br>TCTATATTTT | CCAGAATCTG<br>ATAATCTAAA |

1 1 1 1 1  
5 95

|            |                          |                          |                          |                          |                     |
|------------|--------------------------|--------------------------|--------------------------|--------------------------|---------------------|
| ASIAN2_Ema | CATTTT-GTT<br>AGCTGAGATG | GTTGTTTTT-<br>TCTCGCCTCT | GCTTT-CTTG<br>GCSTGAAGGT | TTGCAAGTCC<br>ATTGTATGTG | ACTGTAGTAC<br>TTGGC |
| FOR_DS1535 | CATTTT-GTT<br>AGCTGAGATG | GTTGTTTTT-<br>TCTCGCCTCT | GCTTT-CTTG<br>GCCTGAAGGT | TTGCAAGTCC<br>ATTGTATGTG | ACTGTAGTAC<br>TTGGC |
| MAM1_SP134 | CATTTT-GTT<br>AGCTGAGATG | GTTGTTTTT-<br>TCTCGCCTCT | GCTTT-CTTG<br>GCCTGAAGGT | TTGCAAGTCC<br>ATTGTATGTG | ACTGTAGTAC<br>TTGGC |
| MAST_A078_ | TATTTTTGTT<br>AGCTGAGATG | GTTGTTTTT<br>TCTCGCCTCT  | GCTTTTCTTG<br>ACCTGAAGGT | TTGCAAGTCC<br>ATTGTATGTG | ACTGTAGTAC<br>TTAGC |
| SAV1_SE210 | CATTTT-GTT<br>AGCTGAGATG | GTTGTTTTT-<br>TCTCGCCTCT | GCTTT-CTTG<br>GCCTGAAGGT | TTGCAAGTCC<br>ATTGTATGTG | ACTGTAGTAC<br>TTGGC |

1 1 1 1 1  
5 106

|            |                                    |                          |                          |                          |                          |
|------------|------------------------------------|--------------------------|--------------------------|--------------------------|--------------------------|
| ASIAN2_Ema | GAAAGAGCCC<br>GAGTGTGGCT<br>GGCTAA | CTTTGTTCCA<br>TCCATTGGGC | GAGCTCCTGG<br>CAAAAGGTGG | GTGACAATGG<br>CCTGGCCTTG | CAGGAGAGGG<br>AAGCCCCGAT |
| FOR_DS1535 | GAAAGAGCCC<br>GAGTGTGGCT<br>GGCTAA | CTTTGTTCCA<br>TCCATTGGGC | GAGCTCCTGG<br>CAAAAGGTGG | GCGACAATGG<br>CCTGGCCTTG | CAGGAGAGGG<br>AAGCCCCGAT |
| MAM1_SP134 | GAAAGAGCCC<br>GAGTGTGGCT<br>GGCTAA | CTTTGTTCCA<br>TCCATTGGGC | GAGCTCCTGG<br>CAAAAGGTGG | GCGACAATGG<br>CCTGGCCTTG | CAGGAGAGGG<br>AAGCCCCGAT |
| MAST_A082_ | GAAAGAGCCC<br>GAGTGTGGCT<br>GGCTAA | CTTTGTTCCA<br>TCCATTGGGC | GAGCTCCTGG<br>CAAAAGGTGG | GCGACAATGG<br>CCTGGCCTTG | CAGGAGAGGG<br>AAGCCCCGAT |
| SAV1_SE210 | GAAAGAGCCC<br>GAGTGTGGCT<br>GGCTAA | CTTTGTTCCA<br>TCCATTGGGC | GAGCTCCTGG<br>CAAAAGGTGG | GCGACAATGG<br>CCTGGCCTTG | CAGGAGAGGG<br>AAGCCCCGAT |

1 1 1 1 1  
5 103

|            |                                 |                          |                          |                          |                          |
|------------|---------------------------------|--------------------------|--------------------------|--------------------------|--------------------------|
| ASIAN2_Ema | TGTGACTCTT<br>CCCCACTCGG<br>TCA | GTGTGCTTAA<br>GGGAGCAAAC | CGCTCACAGC<br>CACCTCGGCC | CTGCTAGGTT<br>ACTGGACACG | AGTCGAGCCT<br>GGATCAAGGG |
| FOR_DS1535 | TGTGACTCTT<br>GCCCACTCGG<br>TCA | GTGTGCTTAA<br>GGGAGCAAAC | CGCTCACAGC<br>CACCTCGGCC | CTGCTAGGTT<br>ACTGGACACG | AGTCGAGCCT<br>GGATCAAGGG |
| MAM1_SP134 | TGTGACTCTT<br>CCCCACTCGG<br>TCA | GTGTGCTTAA<br>GGGAGCAAAC | CGCTCACAGC<br>CAYCTCGGCC | CTGCTAGGTT<br>ACTGGACACG | AGTCGAGCCT<br>GGATCAAGGG |
| MAST_A083_ | TGTGATTCTT<br>CCCCACTCGG<br>TCA | GTGTGCTTAA<br>GGGAGCAAAC | CGCTCACAGC<br>CACCTCGGCC | CTGCTAGGTA<br>ACTGGACACG | AGTCGAGCCT<br>GGATCAAGGG |
| SAV1_SE210 | TGTGACTCTT<br>GCCCACTCGG<br>TCA | GTGTGCTTAA<br>GGGAGCAAAC | CGCTCACAGC<br>CACCTCGGCC | CTGCTAGGTT<br>ACTGGACACG | AGTCGAGCCT<br>GGATCAAGGG |

1 1 1 1 1  
5 101

|            |                               |                          |                          |                          |                          |
|------------|-------------------------------|--------------------------|--------------------------|--------------------------|--------------------------|
| ASIAN2_Ema | GTCTGTCAGG<br>ATCCCCTTAC<br>G | CTTTCTTAGG<br>CTGACCCCCT | AAGGAGAAGA<br>TCCCAGCCTT | GCAGTCTTGT<br>TACTGCGCTG | ACCCCACTGC<br>TTGGCTAAGT |
| FOR_DS1535 | GTCTGTCAGG<br>ATCCCCTTAC<br>G | TTTTCTTAGG<br>CTGACCCCCT | AAGGAGAAGA<br>TCCCAGGCTT | GCAGTCTTGT<br>TACTGCGCTG | ATCCCCTGC<br>TGGGCTAAGT  |
| MAM1_SP134 | GTCTGTCAGG                    | CTTTCTTAGG               | AAGGAGAAGA               | GCAGYCTTGT               | ACCCCACTGC               |



|            |                 |            |            |            |            |
|------------|-----------------|------------|------------|------------|------------|
|            | ATCCCCTTAC      | CTGACCCCCT | TCCCAGCCTT | TACTGCGCTG | TTGGCTAAGT |
| MAST_A084_ | G<br>GTCTGTCAGG | CTTCCTTAGG | AAGGAGAAGA | GCAGTCTTGT | ACCCCACTGC |
|            | ATCCCCTTAC      | CTGACCCCCT | TCCCAGCCTT | TACTGTGCTG | TGGGCTAAGT |
| SAV1_SE210 | G<br>GTCTGTCAGG | CTTTCTTAGG | AAGGAGAAGA | GCAGTCTTGT | ACCCCACTGC |
|            | ATCCCCTTAC      | CTGACCCCCT | TCCCAGCCTT | TACTGCGCTG | TGGGCTAAGT |
|            | G               |            |            |            |            |

1 1 1 1 1  
5 93

|            |            |            |            |            |            |
|------------|------------|------------|------------|------------|------------|
| ASIAN2_Ema | TCCTGCCTCT | CTAGCCCAGT | GGCCTTCCAC | CATCTGTCCA | TGGCCCTGCA |
| FOR_DS1535 | CCTCCTCTCC | TGCCCTGCCA | CCCTGCAGCC | ACCAGGAATT | GTT        |
|            | TCCTGCCTCT | CTAGCCCAGT | GGCCTTCCAC | CATCTGTCCA | TGTCCCTGCA |
| MAM1_SP134 | CCTCCTCTCC | TGCCCTGCCA | CCCTGCAGCC | ACCAGGAATT | GTT        |
|            | TCCTGCCTCT | CTAGCCCAGT | GGCCTTCCAC | CATCTGTCCA | TGGCCCTGCA |
| MAST_A085_ | CCTCCTCTCC | TGCCCTGCCA | CCCTGCAGCC | ACCAGGAATT | GTT        |
|            | TTTTGCCTCT | CTAGCCCAGT | GGCTTTCCAC | CATCTGTCTA | TGGCCCTACC |
| SAV1_SE210 | CCTCCTCTCC | TGCCCTGCCA | CCCTGCAGCC | ACCAGGAATT | GTT        |
|            | TCCTGCCTCT | CTAGCCCAGT | GGCCTTCCAC | CATCTGTCCA | TGGCCCTGCA |
|            | CCTCCTCTCC | TGCCCTGCTA | CCCTGCAGCC | ACCAGGAATT | GTT        |

1 1 1 1 1  
5 94

|            |            |            |            |            |            |
|------------|------------|------------|------------|------------|------------|
| ASIAN2_Ema | GAGACGTTGC | TCTAGGAGGG | TCTTGTCTGC | CTTCCTGCCC | CAAACACACA |
| FOR_DS1535 | GTAAGGATTG | GCCCCCAGC  | ACCTCCTAAA | GGAGATGGAC | CAGT       |
|            | GAGACGTTGC | TCTAGGAGGG | TCTTGTCTGC | CTTCCTGCCC | CAAACACACA |
| MAM1_SP134 | GTAAGGATTG | SCCCCCAGC  | ACCTCCTAAA | GGAGATGGAC | CAGT       |
|            | GAGACATTGC | TCTAGGAGGG | TCTTGTCTAC | CTTCCTGCCC | CAAACACACA |
| MAST_A086_ | ATAAGGATTG | GCCCCCAGC  | ACCTCCTAAA | GGAGATGGAC | CAGT       |
|            | GAGATGTTGC | TCTAGGAGGG | TCTTGTCTGC | CTTCCTGCCC | CAAACACACA |
| SAV1_SE210 | GTAAGGATTG | GCCCCCAGC  | ACCTTCTAAA | GGAGATGGAC | CAGT       |
|            | GAGACGTTGC | TCTAGGAGGG | TCTTGTCTGC | CTTCCTGCCC | CAAACACACA |
|            | GTAAGGATTG | GCCCCCAGC  | ACCTCCTAAA | GGAGATGGAC | CAGT       |

1 1 1 1 1  
5 98

|            |             |            |            |            |            |
|------------|-------------|------------|------------|------------|------------|
| ASIAN2_Ema | AAAACCTCAGG | GCCCCTTGTT | TAAAATCATG | AATTTCAAGA | AGGAGATGTA |
| FOR_DS1535 | TTAAACCAAG  | CGTGGGGTCC | CTCTAAGCGT | GAAACCCCGT | CCAACTGC   |
|            | AAAACCTCAGG | GCCCCTTGTT | TAAAATCATG | AATTTCAAGA | AGGAGATGTA |
| MAM1_SP134 | TTAAACCAAG  | CGTGGGGTCC | CTCTAAGCGT | GAAACCCCGT | CCAACTGC   |
|            | AAAACCTCAGG | GCCCCTTGTT | TAAAATCATG | AATTTCAAGA | AGGAGATGTA |
| MAST_A087_ | TTAAACCAAG  | CGTGGGGTCC | CTCTAAGCGT | GAAACCCCGT | CCAACTGC   |
|            | AAAACCTCAGG | GCCCCTTGTT | TAAAATCACG | AATTTCAAGA | AGGAGATGTA |
| SAV1_SE210 | TGAAACCAAG  | CGTGGGATCC | CCCTAAGCGT | GAAACCCTGT | CCAACTGC   |
|            | AAAACCTCAGG | GCCCCTTGTT | TAAAATCATG | AATTTCAAGA | AGGAGATGTA |
|            | TTAAACCAAG  | CGTGGGGTCC | CTCTAAGCGT | GAAACCCCGT | CCAACTGC   |

1 1 1 1 1  
5 103

|            |             |            |            |            |            |
|------------|-------------|------------|------------|------------|------------|
| ASIAN2_Ema | AGAAAATCTT  | AAATCTTTGT | GCTTGAAGGG | GCTTTGAGAG | ATACCTATGT |
| FOR_DS1535 | CCGTTTCCTGG | TCTTAGTGTG | AGTAAGAGCT | GATGGGACAA | CATGGCCAGA |
|            | GCG         |            |            |            |            |
|            | AGAAAATCTT  | AAATCTTTGT | GCTTGAAGGG | GCTTTGAGAG | ATACCTATGT |
| MAM1_SP134 | CCGTTTCCTGG | TCTTAGTGTG | AGTAAGAGCT | GATGGGACAA | CATGGCCAGA |
|            | GCG         |            |            |            |            |
|            | AGAAAATCTT  | AAATCTTTGT | GCTTGAAGGG | GCTTTGAGAG | ATACCTATGT |
| MAST_A088_ | CCGTTTCCTGG | TCTTAGTGTG | AGTAAGAGCT | GATGGGACAA | CATGGCCAGA |
|            | GCG         |            |            |            |            |
| SAV1_SE210 | AGAAAATCTT  | AAATCTTTGT | GCTTGAAGGG | GCTTTGAGAG | ATACCTATGT |
|            | CCGTTTCCTGG | TCTTAGTGTG | AGTAAGAGCT | GATGGGACAA | CATGGCCAGA |
|            | GCG         |            |            |            |            |

1 1 1 1 1

5 94

|            |            |            |            |            |            |
|------------|------------|------------|------------|------------|------------|
| ASIAN2_Ema | TGACATAGTT | TCCAGCATCA | TAGTAATACA | CAAGGCA-CC | AGAGAATGAC |
|            | AGACAGGTGG | TGGCATTTC  | AGTAAGATGT | GTCCATTTC- | ACAA       |
| FOR_DS1535 | TGACATAGTT | TCCAGCATCA | TAGTAATACA | CAAGGCA-CC | AAAGAATGAC |
|            | AGACAGGTGG | TGACATTTC  | AGTAAGATGT | GTCCATTTC- | ACAA       |
| MAM1_SP134 | TGACATAGTT | TCCAGCATCA | TAGTAATACA | CAAGGCA-CC | ACAGAATGAC |
|            | AGACAGGTGG | TGGCATTTC  | AGTAAGATGT | GTCCATTTC- | ACAA       |
| MAST_A091_ | TGACATAGTT | TCCAGCATCA | TAGTAATACA | CAAGGCACCC | ACAGAATGAC |
|            | AGACAGGTGG | TGGCATTTC  | AGTAAGGTGT | GTCCATTTC  | ACAA       |
| SAV1_SE210 | TGACATAGTT | TCCAGCATCA | TAGTAATACA | CAAGGCA-CC | ACAGAATGAC |
|            | AGACAGGTGG | TGGCATTTC  | AGTAAGATGT | GTCCACTTC- | ACAA       |

1 1 1 1 1  
5 98

|            |            |            |            |            |            |
|------------|------------|------------|------------|------------|------------|
| ASIAN2_Ema | ATTTAAGCTT | TGGAATTCTG | CTAATCCAAG | GCGACAGGAG | ACCTGCCCTT |
|            | CAGTCCAACA | TGGTGTGTGT | GTGTTTGAGT | ATATGTGTGG | ATATCAAC   |
| FOR_DS1535 | ATTTAAGCTT | TGGAATTCTG | CTAATCCAAG | GCGACAKGAG | ACCTGCCCTT |
|            | CAGTCCAACA | TGGTGTGTGT | GTGTTTGAGT | ATATGTGTGG | RTATCAAC   |
| MAM1_SP134 | ATTTAAGCTT | TGGAATTCTG | CTAATCCAAG | GCGACAGGAG | ACCTGCCCTT |
|            | CAGTCCAACA | TGGTGTGTGT | GTGTTTGAGT | ATATGTGTGG | ATATCAAC   |
| MAST_A094_ | ATTTAAGCTT | TGGAATTCTG | CTAATCCAAG | GCGACAGGAG | ACCTGCCCTT |
|            | CAGTCCAACA | TGGTGTGTGT | GTGTTTGAGT | ATATGTGTGG | GTATCAAC   |
| SAV1_SE210 | ATTTAAGCTT | TGGAATTCTG | CTAATCCAAG | GCGACAGGAG | ACCTGCCCTT |
|            | CAGTCCAACA | TGGTGTGTGT | GTGTTTGAGT | ATATGTGTGG | ATATCAAC   |

1 1 1 1 1  
5 100

|            |            |            |            |            |             |
|------------|------------|------------|------------|------------|-------------|
| ASIAN2_Ema | ACAACAACAT | GGACAAAATA | CTGAACAACA | CGGGAAGCAT | CAAAAAGAAGA |
|            | TGGAAAGAAT | ACACAGAACC | ATTGTACCAA | AAAGAACTGG | TCAATGTACA  |
| FOR_DS1535 | ACAACAACAT | GGACAAAATM | CTGAACAACA | CGGGAAGCAT | CAAAAAGAAGA |
|            | TGGAAAGAAT | ACACAGAATC | ATTGTACCAA | AAAGAACTGG | TCAATGTACA  |
| MAM1_SP134 | ACAACAACAT | GGACAAAATA | CTGAACAACA | CGGGAAGCAT | CAAAAAGAAGA |
|            | TGGAAAGAAT | ACACAGAATC | ATTGTACCAA | AAAGAACTGG | TCAATGTACA  |
| MAST_A097_ | ATAATAATAT | GGACAAAATA | CTGAACAACA | CGGGAAGCAT | CAAAAAGAAGA |
|            | TGGAAAGAAT | ACACAGAATC | ATTGTACCAA | AAAGAATTGG | TCAATGTACA  |
| SAV1_SE210 | ACAACAACAT | GGACAAAATA | CTGAACAACA | CGGGAAGCAT | CAAAAAGAAGA |
|            | TGGAAAGAAT | ACACAGAATC | ATTGTACCAA | AAAGAACTGG | TCAATGTACA  |

1 1 1 1 1  
5 101

|            |            |            |             |            |            |
|------------|------------|------------|-------------|------------|------------|
| ASIAN2_Ema | TGAGCATCTT | CCTTAGGCCA | CATTTTCATGA | GAAGGCTGTG | GTCTGGAGCC |
|            | CTGGGTTGGG | GGAAGTCAGT | TGTTTCATCT  | TCCAATTACC | CACAGTGAGC |
| FOR_DS1535 | TGAGCATCTT | CCTTAGGCCA | CATTTTCATGA | GAAGGCTGTG | GTCTGGAGCC |
|            | CTGGGTTGGG | GGAAGTCAGT | TGTTTCATCT  | TCCAATTACC | CACAGTGAGC |
| MAM1_SP134 | TGAGCATCTT | CCTTAGGCCA | CATTTTCATGA | GAAGGCTGTG | GTCTGGAGCC |
|            | CTAGGTTGGG | GGAAGTCAGT | YGTTTCATCT  | TCCAATTACC | CACAGTGAGC |
| MAST_A099_ | TGAGCATCTT | CCTTAGGCCA | CATTTTCATGA | GAAGGCTGTG | GTCTGGAGCC |
|            | CTGGGTTGGG | GGAAGTCAGT | CATTTTCATCT | TCCAATTACC | CACAATGAAC |
| SAV1_SE210 | TGAGCATCTT | CCTYAGGCCA | CATTTTCATGA | GAAGGCTGTG | GTCTGGAGCC |
|            | CTGGGTTGGG | GGAAGTCAGT | TGTTTCATCT  | TCCAATTACC | CACAGTGAGC |

1 1 1 1 1  
5 96

|            |            |            |            |            |            |
|------------|------------|------------|------------|------------|------------|
| ASIAN2_Ema | AGAGCAAATG | GGCCAGAGGA | CGCCCCATCA | TCCACTGCCA | TCCAGTCGAT |
|            | CCTGCCAGAG | TCGCTGAGAA | GACAAACCTC | CATCCTATTC | CGTTTG     |
| FOR_DS1535 | AGAGCAAATG | GGCCAGAGGA | CGCCCCATCA | TCCACTGCCA | TCCAGTCGAT |
|            | CCTGCCAGAG | TCGCTGAGAA | GACAAACTTC | CATCCTATTC | CGTTTG     |
| MAM1_SP134 | AGAGCAAATG | GGCCAGAGGA | CGCCCCATCA | TCCACTGCCA | TCCAGTCGAT |
|            | CCTGCCAGAG | TCGCTGAGAA | GACAAACTTC | CATCCTATTC | CGTTTG     |
| MAST_A101_ | AGAGCAAATG | GGCCAGAGAA | TGCCCCATTA | TCCATTGCCA | TCCAGTCGAT |
|            | CCTGCCAGAG | TCGCTGAGAA | GACAAACTTC | CATCCTATTC | CGTTTG     |

SAV1\_SE210 AGAGCAAATG GGCCAGAGGA CGCCCCATCA TCCACTGCCA TCCAGTCGAT  
CCTGCCAGAG TCGCTGAGAA GACAAACATC CATCCTATTC CGTTTG

1 1 1 1 1  
5 96

ASIAN2\_Ema ACATTCTAGA TCCTCCTGCC CAGCATTCTG GCCTCTGCTA GACACACCCC  
CAGCAGCATT CCTGGCATTG TAGGCTCCAA ACAGGTTCTA GAGCTT  
FOR\_DS1535 ACATTCTAGA TCCTCCTGCC CAGCATTCTG GCCTCTGCTA GACACACCCC  
CAGCAGCATT CCTGGCATTG TAGGCTCCAA ACAGGTTCTA GAGCTT  
MAM1\_SP134 ACATTCTAGA TCCTCCTGCC CAGCATTCTG GCCTCTGCTA GACACACCCC  
CAGCAGCATT CCTGGCATTG TAGGCTCCAA ACAGGTTCTA GAGCTT  
MAST\_A105\_ ACATTCTAGA CCCTCCTGCC CCGCATTCTG GCCTCTGCTA GACACACCCC  
CAGCAGCATT CCTGGCATTG TAGGCTCCAA ACAGGTTCTA GAGCTT  
SAV1\_SE210 ACATTCTAGA TCCTCCTGCC CAGCATTCTG GCCTCTGCTA GACACACCCC  
CAGCAGCATT CCTGGCATTG TAGCCTCCAA ACAGGTTCTA GAGCTT

1 1 1 1 1  
5 106

ASIAN2\_Ema CCTATCATTC ACCTTCACTA AGAATATTGC TTGACTTGCA GAGGTCATGA  
AGAACTGGAA TCTTGCAGGC TTTAACGAGG AAAAAGAAAA TTTAAAAGTC  
TCTATA  
FOR\_DS1535 CCTATCATTC ACCTTCACTA AGAATATTGC TTGACTTGCA GAGGTCATGA  
AGAACTGGAA TCTTGCAGGC TTTAACGAGG AAAAAGAAAA TTTAAAAGTC  
TCTATA  
MAM1\_SP134 CCTATCATTC ACCTTCACTA AGAATATTGC TTGACTTGCA GAGGTCATGA  
AGAACTGGAA TCTTGCAGGC TTTAACGAGG AAAAAGAAAA TTTAAAAGTC  
TCTATA  
MAST\_A107\_ CCTATCATTC ACCTTCACTA AGAATATTGC TTGACTTGCA GAGGTCATGA  
AGAACTGGAA TCTTGCAGGC TTTAACGAAG AAAAAGAAAA TTTAAAAGTC  
TCTGTA  
SAV1\_SE210 CCTATCATTC ACCTTCACTA AGAATATTGC TTGACTTGCA GAGGTCATGA  
AGAACTGGAA TCTTGCAGGC TTTAACGAGG AAAAAGAAAA TTTAAAAGTC  
TCTATA

1 1 1 1 1  
5 94

ASIAN2\_Ema TAGTGGAAGC CCCTGGTGGC GGCGAGGCTG CGAAGCACCG GGCCCTGGAT  
GGCGGAGGCT CCTCCTCCTT CGTCTGCCGC CGAGGAGACG CCGA  
FOR\_DS1535 TAGTGGAAGC CCCTGGTGGC GGCGAGGCTG CGAAGCACCG GGCCCTGGAT  
GGCGGAGGCT CCTCCTCCTT CGTCTGCCGC CGAGGAGACG CCGA  
MAM1\_SP134 TAGTGGAAGC CCCTGGTGGC GGCGAGGCTG CGAAGCACCG GGCCCTGGAT  
GGCGGAGGCT CCTCCTCCTT CGTCTGCCGC CGAGGAGACG CCGA  
MAST\_A109\_ TGGTGGAAGC CTTTGGTGGC GGCGAGGTTG CGAAGCACCG GGCCCTGGAT  
GGCGGAGGCT CCTCCTCCTT CGTCTGCTGC CGAGGAGAGG CCGC  
SAV1\_SE210 TAGTGGAAGC CCCTGGTGGC GGCGAGGCTG CGAAGCACCG GGCCCTGGAT  
GGCGGAGGCT CCTCCTCCTT CGTCTGCCGC CGAGGAGACG CCGA

1 1 1 1 1  
5 102

ASIAN2\_Ema CTGGTGGATT TGAAGTCTG ACCTTTT-GA TTAGCAGCCA AGCTCTTAAC  
CACTGTGCCA CCAACTTCCA GATGCCTGCT ACCCAGGCAT AAAA-GATTT  
TA  
FOR\_DS1535 CTGGTGGATT TGAAGTCTG ACCTTTT-GA TTAGCAGCCA AGCTCTTAAC  
CACTGTGCCA CCAACTTCCA GATGCCTGCT ACCCAGGCAT AAAA-GATTT  
TA  
MAM1\_SP134 CTGGTGGATT TGAAGTCTG ACCTTTT-GA TTAGCAGCCA AGCTCTTAAC  
CACTGTGCCA CCAACTTCCA GATGCCTGCT ACCCAGGCAT AAAA-GATTT  
TA  
MAST\_A112\_ CTGGTGGATT TGAAGTCTG ACCTTTTTGA TTAGCAGCCA AGCTCTTAAC  
CACTGTGCCA CCAACTTCCA GATGCCTGCT ACCCAGGCAT AAAAAGATTT  
TA  
SAV1\_SE210 CTGGTGGATT TGAAGTCTG ACCTTTT-GA TTAGCAGCCA AGCTCTTAAC  
CACTGTGCCA CCAACTTCCA GATGCCTGCT ACCCAGGCAT AAAA-GATTT  
TA

1 1 1 1 1  
5 102

|            |                                |                           |                          |                          |                          |
|------------|--------------------------------|---------------------------|--------------------------|--------------------------|--------------------------|
| ASIAN2_Ema | TCCTGATGGG<br>ATCAGCGTTG<br>CT | GTGGGGCCGG<br>CTCATCTCGA  | CAGAGCAGAG<br>GTGGCCAGTG | GGGATTTTTT<br>AACAAGAGAA | AGCCTGAATT<br>GTCAAATCTC |
| FOR_DS1535 | TCCTGATGGG<br>ATCAGCGTTG<br>CT | GTGGGGCCGG<br>CTCATCTCGA  | CAGAGCAGAG<br>GTGGTCAGTG | GGGATTTTTT<br>AACAAGAGAA | AGCCTGAATT<br>GTCAAATCTC |
| MAM1_SP134 | TCCTGATGGG<br>ATCAGCGTTG<br>CT | GTGGGGCCGG<br>CTCATCTCGA  | CAGAGCAGAG<br>GTGGCCAGTG | GGGATTTTTT<br>AACAAGAGAA | AGCCTGAATT<br>GTCAAATCTC |
| MAST_A113_ | TTCTGATGGG<br>ATCAGCGTTG<br>CT | GTGGGGCCGG<br>CTCATTTCTGA | CAGAGCAGAG<br>GTGGCCAGTG | GGGATTTTTT<br>AACAAGAGAA | AGCCTGAATT<br>GTCAAATCTC |
| SAV1_SE210 | TCCTGATGGG<br>ATCAGCGTTG<br>CT | GTGGGGCCGG<br>CTCATCTCGA  | CAGAGCAGAG<br>GTGGTCAGTG | GGGATTTTTT<br>AACAAGAGAA | AGCCTGAATT<br>GTCAAATCTC |

1 1 1 1 1  
5 98

|            |                          |                          |                          |                          |                        |
|------------|--------------------------|--------------------------|--------------------------|--------------------------|------------------------|
| ASIAN2_Ema | TTCTATCTTC<br>AAATGAGTCT | CCAGCCACTC<br>CTGAGAAGCT | TGAGGAACTG<br>GGGTGTGTGG | GTATGGGTCA<br>CTGGGCCCAA | GTAGGTGGGA<br>GAGGTAAT |
| FOR_DS1535 | TTCTATCTTC<br>AAATGAGTCT | CCAGCCACTC<br>CTGAGAAGCT | TGAGGAACTG<br>GGGTGTGTGG | GTATGGGTCA<br>CTGGGCCCAA | GTAGGTGGGA<br>GAGGTAAT |
| MAM1_SP134 | TTCTATCTTC<br>AAATGAGTCT | CCAGCCACTC<br>CTGAGAAGCT | TGAGGAACTG<br>GGGTGTGTGG | GTATGGGTCA<br>CTGGGCCCAA | GTAGGTGGGA<br>GAGGTAAT |
| MAST_A117_ | TTCTATCTTC<br>AAATGAGTCT | CCAGCCACTC<br>CTGAGAAGCT | TGAGGAACTG<br>GGGTGTGTGG | GTATGGGTCA<br>CTGGGCCCAA | GTAGGTGGGA<br>GAAGTAAT |
| SAV1_SE210 | TTCTATCTTC<br>AAATGAGTCT | CCAGCCACTC<br>CTGAGAAGCT | TGAGGAACTG<br>GGGTGTGTGG | GTATGGGTCA<br>CTGGGCCCAA | GTAGGTGGGA<br>GAGGTAAT |

1 1 1 1 1  
5 105

|            |                                   |                          |                          |                          |                          |
|------------|-----------------------------------|--------------------------|--------------------------|--------------------------|--------------------------|
| ASIAN2_Ema | AACTGTGCTC<br>AGCGGGCCTT<br>TTCAG | CATAAGGCTT<br>TCTTCTGAGG | TCAATGGCTG<br>TGCCTCTGGG | TGATCTTCAG<br>TGGACTCGAA | GAGGTAAGTC<br>CTGCCAACCT |
| FOR_DS1535 | AACTGTGCTC<br>AGCGGGCCTT<br>TTCAG | CATAAGGCTT<br>TCTTCTGAGG | TCAATGGCTG<br>TGCCTCTGGG | TGATCTTCAG<br>TGGAYTCGAA | GAAGT----C<br>CTGCCAACCT |
| MAM1_SP134 | AACTGTGCTC<br>AGCGGGCCTT<br>TTCAG | CATAAGGCTT<br>TCTTCTGAGG | TCAATGGCTG<br>TGCCTCTGGG | TGATCTTCAG<br>TGGACTCGAA | GAAGTAAGTC<br>CTGCCAACCT |
| MAST_A122_ | AACTGTGCTC<br>ACGGGGCCTT<br>TTCAG | CATAAGGCTT<br>TCTTCTGAGG | TCAATGGCTG<br>TGCCTCTGGG | TGATCTTCAG<br>TGGACTCGAA | GAAGTAAGTC<br>CTGCCAACCT |
| SAV1_SE210 | AACTGTGCTC<br>AGCGGGCCTT<br>TTCAG | CATAAGGCTT<br>TCTTCTGAGG | TCAATGGCTG<br>TGCCTCTGGG | TGATCTTCAG<br>TGGACTCGAA | GAAGTAAGTC<br>CTGCCAACCT |

1 1 1 1 1  
5 102

|            |                                |                          |                          |                          |                          |
|------------|--------------------------------|--------------------------|--------------------------|--------------------------|--------------------------|
| ASIAN2_Ema | GGTAAATAAG<br>TGCAGCAAAG<br>CA | AACTTTAACT<br>GCCTAATACA | CTTGAAGCCG<br>TAATTTAGTC | GAAGGATCTG<br>ATGAAAGGCC | GGGAATCGAA<br>AAAA-TAGAT |
| FOR_DS1535 | GGTAAATAAG<br>TGCAGCAAAG<br>CA | AACTTTAACT<br>GCCTAATACA | CTTGAAGCCA<br>TAATTTAGTC | GAAGGATCTG<br>ATGAAAGGCC | GGGAATCGAA<br>AAAA-TAGAT |
| MAM1_SP134 | GGTAAATAAG<br>TGCAGCAAAG<br>CA | AACTTTAACT<br>GCCTAATACA | CTTGAAGCCA<br>TAATTTAGTC | GAAGGATCTG<br>ATGAAAGGCC | GGGAATCGAA<br>AAAA-TAGAT |
| MAST_A123_ | GGTAAATAAG<br>TGCAGCAAAG<br>CA | AACTTTAACT<br>GCCTAATACA | CTTGAAGCCA<br>TAATTTAGTC | GAAGGATCTG<br>ATGAAAGGCC | GGGAATCGAA<br>AAAAATAGAT |
| SAV1_SE210 | GGTAAATAAG<br>TGCAGCAAAG<br>CA | AACTTTAACT<br>GCCTAATACA | CTTGAAGCCA<br>TAATTTAGTC | GAAGGATCTG<br>ATGAAAGGCC | GGGAATCGAA<br>AAAA-TAGAT |

1 1 1 1 1  
5 93

|            |            |            |            |            |            |
|------------|------------|------------|------------|------------|------------|
| ASIAN2_Ema | AAAGGCCTGG | CAATTT--GC | TTCTGAAAAA | TTATCCATCG | AAAACCCAAT |
|            | GGGCACAGCT | TTACTCTGAC | ACACATGGGG | TCGCCATGAG | TCG        |
| FOR_DS1535 | AAAGGCCTGG | CAATTT--AC | TTCTGAAAAA | TTATCCATCG | AAAACCCAAT |
|            | GAGCACAGCT | TTACTCTGAC | ACACATGGGG | TCGCCATGAG | TCG        |
| MAM1_SP134 | AAAGGCCTGG | CAATTT--AC | TTCTGAAAAA | TTATCCATCG | AAAACCCAAT |
|            | GAGCACAGCT | TTACTCTGAC | ACACATGGGG | TCGCCATGAG | TCG        |
| MAST_A128_ | AAAGGCCTGG | CGATTTGTA- | TTC--AAAAA | TTATCCATCG | AAAACCCAAA |
|            | GAGCACAGCT | TTACTCTGAC | ACACATGGGG | TCGCCATGAG | TCG        |
| SAV1_SE210 | AAAGGCCTGG | CAATTT--AC | TTCTGAAAAA | TTATCCATCG | AAAACCCAAT |
|            | GAGCACAGCT | TTACTCTGAC | ACACATGGGG | TCGCCATGAG | TCG        |

1 1 1 1 1  
5 101

|            |            |            |            |            |            |
|------------|------------|------------|------------|------------|------------|
| ASIAN2_Ema | TCCTGGAAGC | ACACAGACCT | GTGCCAACAG | AACCTCTCCT | GGCATGCTGG |
|            | AATTGGCCCT | GTTGTCATCC | CCACATTTTT | CT-CTGGAAC | AAGGAGATAA |
|            | A          |            |            |            |            |
| FOR_DS1535 | TCCTGGAAGC | ACACAGACCT | GTGCCAACAG | AACCTCTCCT | GGCATGCTGG |
|            | AATTGGCCCT | GTTGTCATCC | CCACATTTTT | CT-CTGGAAC | AAGGAGATAA |
|            | A          |            |            |            |            |
| MAM1_SP134 | TCCTGGAAGC | ACACAGACCT | GTGCCAACAG | AACCTCTCCT | GGCATGCTGG |
|            | AATTGGCCCT | GTTGTCATCC | CCACATTTTT | CT-CTGGAAC | AAGGAGATAA |
|            | A          |            |            |            |            |
| MAST_A140_ | TCCTGGAAGC | ACATAGACCT | GTGCCAACAG | AACCTCTCCT | GGCATGCTGG |
|            | AATTGGCCCT | GTTGTCATCC | CTACATTTTT | CTTCTGGAAC | AAGGAGATAA |
|            | A          |            |            |            |            |
| SAV1_SE210 | TCCTGGAAGC | ACACAGACCT | GTGCCAACAG | AACCTCTCCT | GGCATGCTGG |
|            | AATTGGCCCT | GTTGTCATCC | CCACATTTTT | CT-CTGGAAC | AAGGAGATAA |
|            | A          |            |            |            |            |

1 1 1 1 1  
5 101

|            |            |            |            |            |            |
|------------|------------|------------|------------|------------|------------|
| ASIAN2_Ema | ACCCCTGAGA | TTCAGGCCAA | GCCCTACTTC | TCTGCAGAGG | TGATGGAGCC |
|            | TGGGAGCTGG | GCCAAGTAAA | GCCTTTT-CC | AGCCTTTCAA | AGACTTTTCA |
|            | T          |            |            |            |            |
| FOR_DS1535 | ACCCCTGAGA | TTCAGGCCAA | GCCCTACTTC | TCTGCAGAGG | TGATGGAGCC |
|            | TGGGAGCTGG | GCCAAGTAAA | GCCTTTT-CC | AGCCTTTCAA | AGACTKTTCA |
|            | T          |            |            |            |            |
| MAM1_SP134 | ACCCCTGCTA | TTCAGGCCAA | GCCCTACTTC | TCTGCAGAGG | TGATGGAGCC |
|            | TGGGAGCTGG | GCCAAGTAAA | GCCTTTT-CC | AGCCTTTCAA | AGACTTTTCA |
|            | T          |            |            |            |            |
| MAST_A141_ | ACTCTTGAGA | TTCAGGCCAA | GCCCTACTTC | TCTGCAGAGG | TGATGGAGCC |
|            | TGGGAGCTGG | GCCAAGTAAA | GCCTTTTCC  | AGCCTTTCAA | AGACTTTTCA |
|            | T          |            |            |            |            |
| SAV1_SE210 | ACCCCTGAGA | TTCAGGCCAA | GCCCTACTTC | TCTGCAGAGG | TGATGGAGCC |
|            | TGGGAGCTGG | GCCAAGTAAA | GCCTTTT-CC | AGCCTTTCAA | AGACTGTTCA |
|            | T          |            |            |            |            |

1 1 1 1 1  
5 102

|            |            |            |            |            |            |
|------------|------------|------------|------------|------------|------------|
| ASIAN2_Ema | TTTAGTGATG | ATAGTCCAGG | TGGAGGCACA | CACCAAGGGC | AAAGAAACAT |
|            | GGAGAGCAGC | GTTCTCAACC | CCGACGCATG | TTAGGATCAC | CTGGAAAATG |
|            | GC         |            |            |            |            |
| FOR_DS1535 | TTTAGTGATG | ATAGTCCAGG | TGGAGGCACA | CACCAAGGGC | AAAGAAACAT |
|            | GGAGAGCAGC | RTTCTCAACC | CCGACGCATG | TTAGGATCAC | CTGGAAAATG |
|            | GC         |            |            |            |            |
| MAM1_SP134 | TTTAGTGATG | ATAGTCCAGG | TGGAGGCACA | CACCAAGGGC | AAAGAAACAT |
|            | GGAGAGCAGC | GTTCTCAACC | CCGACGCATG | TTAGGATCAC | CTGGAAAATG |
|            | GC         |            |            |            |            |
| MAST_A144_ | TTTAGTGATG | ATAGTCCAGG | TGGAGGCACA | CACCAAGGGC | AAAGAAACAT |
|            | GGAGAGCAGC | GTTCTCAACC | CCGACGCATG | TTAGGATCAC | CTGGAAAATA |
|            | AC         |            |            |            |            |
| SAV1_SE210 | TTTAGTGATG | ATAGTCCAGG | TGGAGGCACA | CACCAAGGGC | AAAGAAACAT |
|            | GGAGAGCAGC | GTTCTCAACC | CCGACGCATG | TTAGGATCAC | CTGGAAAATG |
|            | GC         |            |            |            |            |

1 1 1 1 1  
5 101

|            |                               |                          |                          |                          |                          |
|------------|-------------------------------|--------------------------|--------------------------|--------------------------|--------------------------|
| ASIAN2_Ema | TACGTTGAAC<br>GGCCCTCTCT<br>G | ACAGAGCAAC<br>TCCCCTCTAG | TCCTTCTGTC<br>GAATTTTACA | TGCCTCAGAC<br>GGTTACAGCT | TCCATCCTCA<br>TCTTCATGGG |
| FOR_DS1535 | TACGTTGAAC<br>GGCCCTCTCT<br>G | ACAGAGCAAC<br>TCCCCTCTAG | TCCTTCTGTC<br>GAATTTTCA  | TGCCTCAGAC<br>GGTTACAGCT | TCCATCCTCA<br>TCTTCATGGG |
| MAM1_SP134 | TACGTTGAAC<br>GGCCCTCTCT<br>G | ACAGAGCAAC<br>TCCCCTCTAG | TCCTTCTGTC<br>GAATTTTACA | TGCCTCAGAC<br>GGTTACAGCT | TCCATCCTCA<br>TCTTCATGGG |
| MAST_A145_ | TATTTTGAAC<br>GGCCCTCTCT<br>A | ACAGAGCAAC<br>TCCCCTCTAG | TCCTTCTGTC<br>GAATTTTACA | TGCCTTAGAC<br>GGTTACAGCT | TCCATCCTCA<br>TCTTCGTGGG |
| SAV1_SE210 | TACGTTGAAC<br>GGCCCTCTCT<br>G | ACAGAGCAAC<br>TCCCCTCTAG | TCCTTCTGTC<br>GAATTTTACA | TGCCTCAGAC<br>GGTTACAGCT | TCCATCCTCA<br>TCTTCATGGG |

1 1 1 1 1  
5 92

|            |                          |                          |                          |                          |                  |
|------------|--------------------------|--------------------------|--------------------------|--------------------------|------------------|
| ASIAN2_Ema | CAAAGTTCAA<br>TTCCTGGTCC | CGCTGCAGCC<br>CCACTGTGTA | CCTTCTGCTG<br>CTCGTTCATT | CTAA-GAAAC<br>TCCTGAAAGT | AGACTGTTAC<br>TG |
| FOR_DS1535 | CAAAGTTCAA<br>TTCCTGGTCC | CGCTGCAGCC<br>CCACTGTGTA | CCTTCTGCTG<br>CTCGTTCATT | CTAA-GAAAC<br>TCCTGAAAGT | AGACTGTTAC<br>TG |
| MAM1_SP134 | CAAAGTTCAA<br>TTCCTGGTCC | CGCTGCAGCC<br>CCACTGTGTA | CCTTCTGCTG<br>CTCGTTCATT | CTAA-GAAAC<br>TCCTGAAAGT | AGACTGTTAC<br>TG |
| MAST_A146_ | AAAAGTTCAA<br>TTCCTGGTCC | CGCTGCAGCC<br>CCACTATGTA | CCTTCTGCTG<br>CTCGTTCATT | CTAAAGAAAC<br>TCCTGAAAGT | AGACTGTTAC<br>TG |
| SAV1_SE210 | CAAAGTTCAA<br>TTCCTGGTCT | CGCTGCAGCC<br>CCACTGTGTA | CCTTCTGCTG<br>CTCGTTCATT | CTAA-GAAAC<br>TCCTGAAAGT | AGACTGTTAC<br>TG |

1 1 1 1 1  
5 104

|            |                                  |                          |                          |                          |                          |
|------------|----------------------------------|--------------------------|--------------------------|--------------------------|--------------------------|
| ASIAN2_Ema | TACATTAGTC<br>CAGGC-ATGG<br>CCAG | CCTAACTAGA<br>ACTCCTCTGC | GAGTCAGCCT<br>AGCTCTGGAA | GTCCCTTGAA<br>GTCCAGGATG | GCTCTGAAGC<br>GCGTTTCCCT |
| FOR_DS1535 | TACATTAGTC<br>CAGGC-ATGG<br>CCAG | CCTAACTAGA<br>ACTCCTCTGC | GAGTCAGCCT<br>AGCTCTGGAA | GTCCCTTGAA<br>GTCCAGGATG | GCTCTGAAGC<br>GCGTTTCCCT |
| MAM1_SP134 | TACATTAGTC<br>CAGGC-ATGG<br>CCAG | CCTAACTAGA<br>ACTCCTCTGC | GAGTCAGCCT<br>AGCTCTGGAA | GTCCCTTGAA<br>GTCCAGGATG | GCTCTGAAGC<br>GCGTTTCCCT |
| MAST_A148_ | TACATTAGTC<br>CAGGCGATGG<br>CCAG | CCTAACTAGA<br>ACTCCCCTGC | GAGTCAGCCT<br>AGCTCTGAAA | GTCCCTTGAA<br>GTCCCGGATG | GCTCTGAAGC<br>GCGTTTCCCT |
| SAV1_SE210 | TACATTAGTC<br>CAGGC-ATGG<br>CCAG | CCTAACTAGA<br>ACTCCTCTGC | GAGTCAGCCT<br>AGCTCTGGAA | GTCCCTTGAA<br>GTCCAGGATG | GCTCTGAAGC<br>GCGTTTCCCT |

1 1 1 1 1  
5 98

|            |                          |                          |                          |                          |                        |
|------------|--------------------------|--------------------------|--------------------------|--------------------------|------------------------|
| ASIAN2_Ema | AGCCCTTCCC<br>CACGAGCAGC | AGCGTCCCTA<br>ACAAGCGTCT | CCTGGGCCTC<br>GCATGGTGAT | CCTCACCTGG<br>CACATCGATG | GGTGGATGTC<br>CGTTTGCA |
| FOR_DS1535 | AGCCCTTCCC<br>CACGAGCAGC | AGCGTCCCTA<br>ACAAGCGTCT | CCTGGGCCTC<br>GCATGGTGAT | CCTCACCTGG<br>CACATCGATG | GGTGGATGTC<br>CGTCTGCA |
| MAM1_SP134 | AGCCCTTCCC<br>CACGAGCAGC | AGCGTCCCTA<br>ACAAGCGTCT | CCTGGGCCTC<br>GCATGGTGAT | CCTCACCTGG<br>CACATCGATG | GGTGGATGTC<br>CGTTTGCA |
| MAST_A155_ | AGCCCTTCCC<br>CACGAGCAAC | CGAGTCCCTG<br>ACAAGCGTCT | CCTGGGCCCC<br>GCATGGTGAT | CCTCACCTGG<br>CACATCGATG | GGCGGATGTC<br>CGTTTGCA |
| SAV1_SE210 | AGCCCTTCCC<br>CACGAGCAGC | AGCGTCCCTA<br>ACAAGCGTCT | CCTGGGCCTC<br>GCATGGTGAT | CCTCACCTGG<br>CACATCGATG | GGTGGATGTC<br>CGTCTGCA |

1 1 1 1 1  
5 107

|            |                                     |                          |                          |                          |                          |
|------------|-------------------------------------|--------------------------|--------------------------|--------------------------|--------------------------|
| ASIAN2_Ema | TGCACTTGAG<br>TGCCAAGTGC<br>TGGACCC | AGG-CACTGG<br>TGTGGCCCC- | TGCAGACCTC<br>AAGCAACACC | CAGGCCCCCA<br>AGTGTGGAGC | GCCCCACCC-<br>CCTGGACCTC |
| FOR_DS1535 | TGCACTTGAG                          | AGG-CACTGG               | TGCAGACCTC               | CAGGCCCCCA               | GCCCCACCC-               |

|            |            |            |            |            |            |
|------------|------------|------------|------------|------------|------------|
|            | TGCCACGTGC | TGTGGCCCC- | AAGCAACACC | AGTGTGGAGC | CCTGGACCTC |
|            | TGGACCC    |            |            |            |            |
| MAM1_SP134 | TGCACTTGAG | AGG-CACTGG | TGCAGATGTC | CAGGCCCCCA | GCCCCACCC- |
|            | TGCCAAGTGC | TGTGGCCCC- | AAGCAACACC | AGTGTGGAGC | CCTGGACCTC |
|            | TGGACCC    |            |            |            |            |
| MAST_A156_ | TGCACTTGAG | AGG-CACTGG | TGCAGACCTC | CAGGCCCCCA | GCCCCACCCC |
|            | TGCCAAGAGC | TGTGGCCCC  | AAGCAACACC | AGTGTGGACC | CCTGGACCTC |
|            | TGGACCC    |            |            |            |            |
| SAV1_SE210 | TGCACTTGAG | AGG-CACTGG | TGCAGACCTC | CAGGCCCCCA | GCCCCACCC- |
|            | TGCCAAGTGC | TGTGGCCCC- | AAGCAACATC | AGTGTGGAGC | CCTGGACCTC |
|            | TGGACCC    |            |            |            |            |

1 1 1 1 1  
5 98

|            |            |            |             |            |            |
|------------|------------|------------|-------------|------------|------------|
| ASIAN2_Ema | TTCTTCAGAA | TCAGAGCTGC | CCTAGGCATA  | AAATTCTTAA | CCCTCTAGCT |
|            | TAATCCAAAT | GCAATGAGTC | AGTCAGAAAAG | TAAA-TGGGA | ACCACTGG   |
| FOR_DS1535 | TTCTTCAGAA | TCAGAGCTGC | CCTAGGCATA  | AAATTCTTAA | CCCTCTAGCT |
|            | TAATCCAAAT | GCAATGAGTC | AGTCAGAAAAG | TAAA-TGGGA | ACCACTGG   |
| MAM1_SP134 | TTCTTCAGAA | TCAGAGCTGC | CCTAGGCATA  | AAATTCTTAA | CCCTCTAGCT |
|            | TAATCCAAAT | GCAATGAGTC | AGTCAGAAAAG | TAAA-TGGGA | ACCACTGG   |
| MAST_A165_ | TTCTTCAGAA | TCAGAGCTGC | CCTAGGCATA  | AAATTCTTAA | CCCTCTAGCT |
|            | TAATCCAAAT | GCAATGAGTC | AGTCAGAAAAG | TAAAATGGGA | ATCACTGG   |
| SAV1_SE210 | TTCTTCAGAA | TCAGAGCTGC | CCTAGGCATA  | AAATTCTTAA | CCCTCTAGCT |
|            | TAATCCAAAT | GCAATGAGTC | AGTCAGAAAAG | TAAA-TGGGA | ACCACTGG   |

1 1 1 1 1  
5 98

|            |            |             |            |            |            |
|------------|------------|-------------|------------|------------|------------|
| ASIAN2_Ema | ATTCATTCTT | TCACCTTCTCT | TCCCCAACTT | GTGCTCAGGG | CCCTCATGCT |
|            | GCCTATCTGT | CCAGGAATGG  | CGGAAAATTA | GATATCACAT | AAAAGTAA   |
| FOR_DS1535 | ATTCATTCTT | TCACCTTCTCT | TCCCCAACTT | GTGCTCAGGG | CCCTCATGCT |
|            | GCCTATCTGT | CCAGGAATGG  | CGGAAAATTA | GATATCACAT | AAAAGTAA   |
| MAM1_SP134 | ATTCATTCTT | TCACCTTCTCT | TCCCCAACTT | GTGCTCAGGG | CCCTCATGCT |
|            | GCCTATCTGT | CCAGGAATGG  | CGGAAAATTA | GATATCACAT | AAAAGTAA   |
| MAST_A173_ | ATTTATTCTT | TCACCTTCTCT | TCTCCAACCT | GTGCTCAGGG | CCCTCATGCT |
|            | GCCTATCTGT | CCAGGAATGG  | CAGAAAATTA | GATATCACAT | AAAAGTAA   |
| SAV1_SE210 | ATTCATTCTT | TCACCTTCTCT | TCCCCAACTT | GTGCTCAGGG | CCCTCATGCT |
|            | GCCTATCTGT | CCAGGAATGG  | CGGAAAATTA | GATATCACAT | AAAAGTAA   |

1 1 1 1 1  
5 94

|            |            |            |            |            |            |
|------------|------------|------------|------------|------------|------------|
| ASIAN2_Ema | GAATGATATC | ATACTGCCCC | TTCAGAGATM | TGCCGCCATC | AGGTTATTAG |
|            | GTGGTTTCTG | TGCCCCCGTG | CATTTAAAAT | GGCCTAAAA- | TTAA       |
| FOR_DS1535 | GAATGATATC | ATACTGCCCC | TTCTGAGATC | TGCCRCCATC | AGGTTATTAG |
|            | GTGGTTTCTG | TGCCCCCGTG | CATTTAAAAT | GGCCTAAAA- | TTAA       |
| MAM1_SP134 | GAATGATATC | ATACTGCCCC | TTCAGAGATC | TGCCGCCATC | AGGTTATTAG |
|            | GTGGTTTCTG | TGCCCCCGTG | CATTTAAAAT | GGCCTAAAA- | TTAA       |
| MAST_A178_ | GAATGATATC | ATACTGTTCC | TTCTGAGATC | TGCCGCCATC | AGGTTATTAG |
|            | GTGGTTTCTG | TGCCCCCGTG | CATTTAAAAT | GGCCTAAAA  | TTAA       |
| SAV1_SE210 | GAATGATATC | ATACTGCCCC | TTCTGAGATC | TGCCACCATC | AGGTTATTAG |
|            | GTGGTTTCTG | TGCCCCCGTG | CATTTAAAAT | GGCCTAAAA- | TTAA       |

1 1 1 1 1  
5 97

|            |            |            |            |            |            |
|------------|------------|------------|------------|------------|------------|
| ASIAN2_Ema | CCGTGATGTC | CTTTTTTGGC | TTTCGGTCTT | TCCTGATGAT | GTGTCCAGAG |
|            | TAAGTAAGCT | AAGTCTTGCC | ATCCTTGCTG | CCAAGGAACC | TTCAGGA    |
| FOR_DS1535 | CCGTGATGTC | CTTTTTTGGC | TTTCGGTCTT | TCCTGATGAT | GTGTCCAGAG |
|            | TAAGTAAGCT | AAGTCTTGCC | ATCCTTGCTG | CCAAGGAACC | TTCAGGA    |
| MAM1_SP134 | CCGTGATGTC | CTTTTTTGGC | TTTCGGTCTT | TCCTGATGAT | GTGTCCAGAG |
|            | TAAGTAAGCT | AAGTCTTGCC | ATCCTTGCTG | CCAAGGAACC | TTCAGGA    |
| MAST_A179_ | TTGTGATGTC | CTTTTTTGGC | TTTTGGTCTT | TCCTGATGAT | GTGTCCAGAG |
|            | TAAGTAAGCT | AAGTCTTGCC | ATCCTTGCTG | CCAAGGAACC | TTCAGGA    |
| SAV1_SE210 | CCGTGATGTC | CTTTTTTGGC | TTTCGGTCTT | TCCTGATGAT | GTGTCCAGAG |
|            | TAAGTAAGCT | AAGTCTTGCC | ATCCTTGCTG | CCAAGGAACC | TTCAGGA    |

1 1 1 1 1  
5 99

|            |            |            |            |            |            |
|------------|------------|------------|------------|------------|------------|
| ASIAN2_Ema | AGGAATTCTT | TCTAGGGAG- | ---ACATTTA | GAGACAAGTA | AATAGCAGAG |
| FOR_DS1535 | GGCTGCAGAC | ACAGCCTCCC | AGCACAGAAG | AAAGGAGGGC | TGGCAACAG  |
| MAM1_SP134 | AGGAATTCTT | TCTAGGGAG- | ---ACATTTA | GAGACAAGTA | AATAGCAGAG |
| MAST_A180_ | GGCTGCAGAC | ACAGCCTCCC | AGCACAGAAG | AAAGGAGGGC | TGGCAACAG  |
| SAV1_SE210 | AGGAATTCTT | TCTAGGGAGG | GAGACATTTA | GAGACAAGTA | AATAGCAGAG |
|            | GGCTGCAGAC | ACAGCCTCCC | AGCATAGAAG | AAAGGAGGGC | TGGCAACAG  |
|            | AGGAATTCTT | TCTAGGGAG- | ---ACATTTA | GAGACAAGTA | AATAGCAGAG |
|            | GGCTGCAGAC | ACAGCCTCCC | AGCACAGAAG | AAAGGAGGGC | TGGCAACAG  |

1 1 1 1 1  
5 105

|            |            |            |            |            |            |
|------------|------------|------------|------------|------------|------------|
| ASIAN2_Ema | GAGAAATAAC | CAGCACAGCC | TCTCGCTGCC | CCTTGGCTGA | CTTCCTTGGA |
| FOR_DS1535 | GTCCGTTTCA | CCGAGGAACT | GGCTCGGTGA | CTTGAGCCTA | AGCTCTGGCT |
| MAM1_SP134 | CACAT      |            |            |            |            |
| MAST_A186_ | GAGAAATAAC | CAGCACAGCC | TCTCGCTGCC | CCYTGGCTGA | CTTCCTTGGA |
| SAV1_SE210 | GTCCGTTTCA | CCGAGGAACT | GGCTCCGTGA | CTTGAGCCTA | AGCTCCGGCT |
|            | CACAT      |            |            |            |            |
|            | GAGAAATAAC | CAGCACAGCC | TCTCGCTGCC | CCTTGGCTGA | CTTCCTTGGA |
|            | GTCCGTTTCA | CCGAGGAACT | GGCTCGGTGA | CTTGAGCCTA | AGCTCTGGCT |
|            | CACAT      |            |            |            |            |
|            | GAGAAATAAC | TAGCACAGCC | CCTCGCTGCC | TCCTGGCTGA | CTTCCTTGGA |
|            | GTCCGTTTCA | CCGAGGGACT | GGCTCCGTGA | CTTGAGCCTA | AGCTCCGGCT |
|            | TACAT      |            |            |            |            |
|            | GAGAAATAAC | CAGCACAGCC | TCTCGCTGCC | CCCTGGCTGA | CTTCCTTGGA |
|            | GTCCGTTTCA | CCGAGGAACT | GGCTCCGTGA | CTTGAGCCTA | AGCTCCGGCT |
|            | CACAT      |            |            |            |            |

1 1 1 1 1  
5 93

|            |            |            |            |            |            |
|------------|------------|------------|------------|------------|------------|
| ASIAN2_Ema | AAATGAAGTC | GAGGGCTGGG | GGTCCCCAC  | CTCCTGAAGG | GAAGGCAGCT |
| FOR_DS1535 | AAYGTTAACT | GAATGCTTGC | TCTGTTGTTG | GAGCCTTCGT | GTC        |
| MAM1_SP134 | AAATGAAGTC | GAGGGCTGGG | GGTCCCCAC  | CTCCTGAAGG | GAAGGCAGCT |
| MAST_A190_ | AAYGTTAACT | GAATGCTTGC | TCTGTTGTTG | GAGCCTTCGT | GTC        |
| SAV1_SE210 | AAATGAAGTC | GAGGGCTGGG | GGTCCCC-AC | CTCCTAAAGG | GAAGGCAGCT |
|            | AACGTTAACT | GAATGCTTGC | TCTATTGTTG | GAGCCTTCGC | GTC        |
|            | AAATGAAGTC | GAGGGCTGGG | GGTCCCCAC  | CTCCTGAAGG | GAAGGCAGCT |
|            | AACGTTAACT | GAATGCTTGC | TCTGTTGTTG | GAGCCTTCGT | GTC        |

1 1 1 1 1  
5 103

|            |            |            |            |            |            |
|------------|------------|------------|------------|------------|------------|
| ASIAN2_Ema | ACTTGGCCCT | TTCTGTGTCT | TACGCTGTTG | CCAGCAGTAA | GGGGTTTCTC |
| FOR_DS1535 | AAAAATTTCC | CACTGCAGCT | CATTTTAATG | TGGGAAGTTG | CCAGGGAAGC |
| MAM1_SP134 | TTC        |            |            |            |            |
| MAST_A191_ | ACTTGGCCCT | TTCTGTGTCT | TCCGCTGTTG | CCAGCAGTAA | GGGGTTTCTC |
| SAV1_SE210 | AAAAATTTCC | CACTGCAGCT | CATTTTAATG | TGGGAAGTTG | CCAGGGAAGC |
|            | TTC        |            |            |            |            |
|            | ACTTGGCCCT | TTCTGTGTCT | TACGCTGTTG | CCAGCAGTAA | GGGGTTTCTC |
|            | AAAAATTTCC | CACTGCAGCT | CATTTTAATG | TGGGAAGTTG | CCAGGGAAGC |
|            | TTC        |            |            |            |            |
|            | ACTTGGCCCT | TTCTGTGTCT | TACGCTGTTG | CCAGCAGTAA | GGGGTTTCTC |
|            | AAAAATTTCC | CACTGCAGCT | CATTTTAATG | TGGGAAGTTG | CCAGGGAAGC |
|            | TTC        |            |            |            |            |

1 1 1 1 1  
5 117

|            |            |            |            |            |            |
|------------|------------|------------|------------|------------|------------|
| ASIAN2_Ema | GAGGGCTGTT | GGTGGGGGAA | ACGAAGGGGG | AGAGGGCACC | ACTTTTCCTA |
| FOR_DS1535 | GCCTTTGGGC | CCAGATCTCG | GGGTGGTGGT | GGTGGAGTGG | GCTGAGGTAA |
|            | GACATCCCGG | ATTCCCG    |            |            |            |
|            | TAGGGCTGTT | GGTGGGGGAA | ACGAAGGGGG | AGAGGGCACC | ACTTTTCCTA |
|            | GCCTTTGGGC | CCAGATCTCG | GGGCGGTGGT | GGTGGAGTGG | GCTGAGGTAA |



|            |                                        |                                     |                          |                          |                          |
|------------|----------------------------------------|-------------------------------------|--------------------------|--------------------------|--------------------------|
| MAM1_SP134 | GACATCCCGG<br>GAGGGCTGTT<br>GCCTTTGGGC | ATTCCCG<br>GGTGGGGGAA<br>CCAGATCTCG | ACGAAGGGGG<br>GGGTGGTGGT | AGAGGGCACC<br>GGTGGAGTGG | ACTTTTCCTA<br>GCTGAGGTAA |
| MAST_A195_ | GACATCCCGG<br>GAGGGCTGTT<br>GTCTTTGGGC | ATTCCCG<br>GGCGGGG-AA<br>CCAGATCTCG | ACGAAGGGG-<br>GGGTGGTCAT | AGAGGGCACC<br>AATGAAGTGG | ACTTCTCCTA<br>ACTGAGGTAA |
| SAV1_SE210 | GACATCCCGG<br>GAGGGCTGTT<br>GCCTTTGGGC | ATTCCCG<br>GGTGGGGGAA<br>CCAGATCTCG | ACGAAGGGGG<br>GGGTGGTGGT | AGAGGGCACC<br>GGTGGAGTGG | ACTTTTCCTA<br>GCTGAGGTAA |

1 1 1 1 1  
5 91

|            |                          |                          |                          |                          |                 |
|------------|--------------------------|--------------------------|--------------------------|--------------------------|-----------------|
| ASIAN2_Ema | ATTTTCATAT<br>CTTCTCCTGG | GGATCCCCAG<br>AGGTTGACCA | GCTCAGGGAA<br>ACCAATAGCC | GGGACCTTTC<br>CACTGGCTAT | TTAAGTCTTG<br>A |
| FOR_DS1535 | ATTTTCATAT<br>CTTCTCCTGG | GGATCCCCAG<br>AGGTTGACCA | GCTCAGGGAA<br>ACCAATGGCC | GGGACCTTTC<br>CACTGGCTAT | TTAAGTCTTG<br>A |
| MAM1_SP134 | ATTTTCATAT<br>CTTCTCCTGG | GGATCCCCAG<br>AGGTTGACCA | GCTCAGGGAA<br>ACCAATAGCC | GGGACCTTTC<br>CACTGGCTAT | TTAAGTCTTG<br>A |
| MAST_A196_ | GTTTTTATAT<br>CTTCTCCTGG | GGATCCCCAG<br>AGGTTGACCA | GCTCAGGGAA<br>ACCAATAGCC | GGGACCTTTC<br>CGCTGGCTAT | TTAAGTCTTG<br>A |
| SAV1_SE210 | ATTTTCATAT<br>CTTCTCCTGG | GGATCCCCAG<br>AGGTTGACCA | GCTCAGAGAA<br>ACCAATGGCC | GGGACCTTTC<br>CACTGGCTAT | TTAAGTCTTG<br>A |

1 1 1 1 1  
5 108

|            |                                      |                          |                          |                          |                          |
|------------|--------------------------------------|--------------------------|--------------------------|--------------------------|--------------------------|
| ASIAN2_Ema | AAGTACCCCA<br>AGAGCTTTCT<br>GTATGGAT | TTAATTCTAA<br>AAGAGGGGCC | ACACAGCTGT<br>GCAGTGTCTC | CAGAGGGTCT<br>TACTAGGCAG | TCAACAACCT<br>TACCCACCTG |
| FOR_DS1535 | AAGTACCCCA<br>AGAGCTTTCT<br>GTATGGAT | TTAATTCTAA<br>AAGAGGGGCC | ACACAGCTGT<br>GCAGTGTCTC | CAGAGGGTCT<br>TACTAGGCAG | TCAACAACCT<br>TACCCACCTG |
| MAM1_SP134 | AAGTACCCCA<br>AGAGCTTTCT<br>GTATGGAT | TTAATTCTAA<br>AAGAGGGGCT | ACACAGCTGT<br>GCAGTGTCTC | CAGAGGGTCT<br>TACTAGGCAG | TCAACAACCT<br>TACCCACCTG |
| MAST_A199_ | AAGTACCCCA<br>AGAGCTTTCT<br>GTATGGAT | TTAATTCTAA<br>AAGAGGGGCC | ACACAGCTGT<br>TCAGTGTCTC | CAGAGGGTCT<br>TACTAGGCAG | TCAACAACCT<br>TACCCACCTG |
| SAV1_SE210 | AAGTACCCCA<br>AGAGCTTTCT<br>GTATGGAT | TTAATTCTAA<br>AAGAGGGGCT | ACACAGCTGT<br>GCAGTGTCTC | CAGAGGGTCT<br>TACTAGGCAG | TCAACAACCT<br>TACCCACCTG |

1 1 1 1 1  
5 111

|            |                                        |                               |                          |                          |                          |
|------------|----------------------------------------|-------------------------------|--------------------------|--------------------------|--------------------------|
| ASIAN2_Ema | GAGGCTTCCT<br>AGACACAATT<br>TTCTGAAAAA | CTGGGAGGCC<br>CCGTCCTTAG<br>A | AGCCCCCTTC<br>CATGGCCCCA | C-AGGTGGGT<br>CAAGACACAC | GTCCCCCAGG<br>GGCCTGCTGC |
| FOR_DS1535 | GAGGCTTCCT<br>AGACACAATT<br>TTCTGAAAAA | CTGGGAGGCC<br>CCGTCCTTAG<br>A | AGCCCCCTTC<br>CATGGCCCCA | C-AGGTGGGT<br>CAAGACACAC | GTCCCCCAGG<br>GGCCTGCTGC |
| MAM1_SP134 | GAGGCTTCCT<br>AGACACAATT<br>TTCTGAAAAA | CTGGGAGGCC<br>CCGTCCTTAG<br>A | AGCCCCCTTC<br>CATGGCCCCA | C-AGGTGGGT<br>CAAGACACAC | GTCCCCCAGG<br>GGCCTGCTGC |
| MAST_A200_ | GAGGCTTCCT<br>AGACACAATT<br>TTCTGAAAAA | CTAGGAGGCC<br>CCGTCCTTAG<br>A | AGCCCCCTTC<br>CATGGCCCCA | CCAGGTGGGT<br>CAAGACACAC | GTCCCCCAGG<br>GGCCTGCTGT |
| SAV1_SE210 | GAGGCTTCCT<br>AGACACAATT<br>TTCTGAAAAA | CTGGGAGGCC<br>CCGTCCTTAG<br>A | AGCCCCCTTC<br>CATGGCCCCA | C-AGGTGGGT<br>CAAGACACAC | GTCCCCCAGG<br>GGCCTGCTGC |

1 1 1 1 1  
5 90

|            |                          |                          |                           |                           |            |
|------------|--------------------------|--------------------------|---------------------------|---------------------------|------------|
| ASIAN2_Ema | TGTGGGCCCA<br>ACCTACCAGA | GGGGATGGGC<br>TCAAGGATGG | CTCTGCTGGA<br>AGCCCCCTCGT | GCCCATCATG<br>GGCATAAGTGG | GATCATGGAT |
| FOR_DS1535 | TGTGGGCCCA<br>ACCTACCAGA | GGGGATGGGC<br>TCAAGGATGG | CTCTGCTGGA<br>AGCCCCCTCGT | GCCCATCATG<br>GGCATAAGTGG | GATCATGGAT |
| MAM1_SP134 | TGTGGGCCCC<br>ACCTACCAGA | GGGGATGGGC<br>TCAAGGATGG | CTCTGCTGGA<br>AGCCCCCTCGT | GCCCATCATG<br>GGCATAAGTGG | GATCATGGAT |

|            |                                        |                                        |                                        |                                        |                          |
|------------|----------------------------------------|----------------------------------------|----------------------------------------|----------------------------------------|--------------------------|
| MAST_A201_ | ACCTACCAGA<br>TGTGGGCCCA<br>ACCTACCAGA | TCAAGGATGG<br>GGGGATGGGC<br>TCAAGGATGG | AGCCCCTCGT<br>CTCTGCTGGA<br>AGCCCCTCGT | GGCATAGTGG<br>GCCCATCATG<br>GGCACAGTGG | GATCATTGAT<br>GATCATGGAT |
| SAV1_SE210 | TGTGGGCCCA<br>ACCTACCAGA               | GGGGATGGGC<br>TCAAGGATGG               | CTCTGCTGGA<br>AGCCCCTCGT               | GCCCATCATG<br>GGCACAGTGG               | GATCATTGAT               |

1 1 1 1 1  
5 100

|            |                          |                          |                          |                          |                          |
|------------|--------------------------|--------------------------|--------------------------|--------------------------|--------------------------|
| ASIAN2_Ema | CCAAGAATGC<br>TCAGCAAAAT | CTTAATAGTC<br>ATACTAAAAA | ATTAATTTCA<br>TATCCTCCTG | CAAAGCTTCT<br>TGATAATGAA | TCTATATATG<br>TGATGTCTTG |
| FOR_DS1535 | CCAAGAATGC<br>TCAGCAAAAT | CTTAATAGTC<br>ATACTAAAAA | ATTAATTTCA<br>TATCCTCCTG | CAAAGCTTCT<br>TGATAATGAA | TCTATATATG<br>TRATGTATTG |
| MAM1_SP134 | CCAAGAATGC<br>TCAGCAAAAT | CTTAATAGTC<br>ATACTAAAAA | ATTAATTTCA<br>TATCCTCCTG | CAAAGCTTCT<br>TGATAATGAA | TCTATATATG<br>TGATGTATTG |
| MAST_A205_ | CCAAGAATGC<br>TCAGCAAAAT | CTTAATAGTC<br>ATACTAAAAA | ATTAATTTCA<br>TATCCTCCTG | CAAAGCTTCT<br>CGATAATGAA | ---ATATATG<br>TGATGTATTG |
| SAV1_SE210 | CCAAGAATGC<br>TCAGCAAAAT | CTTAATAGTC<br>ATACTAAAAA | ATTAATTTCA<br>TATCCTCCTG | CAAAGCTTCT<br>TGATAATGAA | TCTATATATG<br>TGATGTATTG |

1 1 1 1 1  
5 104

|            |                                  |                          |                          |                          |                          |
|------------|----------------------------------|--------------------------|--------------------------|--------------------------|--------------------------|
| ASIAN2_Ema | CCCCACACC<br>GGAATCAGCT<br>ACCG  | ATCCCTGCTG<br>CCTGTGCAGA | GCACCTCCTC<br>AAGGGTTAAT | TGCAGGAAAG<br>TCCCTCTT-G | GGAGTGAGCT<br>GAGGGATTAT |
| FOR_DS1535 | CCCCACACC<br>GGAATCAGCT<br>ACTG  | ATCCCTGCTG<br>CCTGTGCAGA | GCACCTCCTC<br>AAGGGTTAAT | TGCAGGAAAG<br>TCCCTCTT-G | GGAGTGAGCT<br>GAGGGATTAT |
| MAM1_SP134 | CCCCACACC<br>GGAATCAGCT<br>ACCG  | ATCCCTGCTG<br>CCTGTGCAGA | GCACCTCCTC<br>AAGGGTTAAT | TGCAGGAAAG<br>TCCCTCTT-G | GGAGTGAGCT<br>GAGGGATTAT |
| MAST_A208_ | CCTCCACACC<br>GGAATCAGCT<br>ACCA | ATCCCTGCTG<br>CCTGTGCAGA | GCACCTCCTC<br>AAGGGTTAAT | GGCAGGAAAG<br>TCCCTCTTAA | GGAGTGAGCT<br>AAAAGATTAT |
| SAV1_SE210 | CCCCACACC<br>GGAATCAGCT<br>ACCC  | ATCCCTGCTG<br>CCTGTGCAGA | GCACCTCCTC<br>AAGGGTTAAT | TGCAGGAAAG<br>TCCCTCTT-G | GGAGTGAGCT<br>GAGGGATTAT |

1 1 1 1 1  
5 98

|            |                          |                           |                          |                          |                        |
|------------|--------------------------|---------------------------|--------------------------|--------------------------|------------------------|
| ASIAN2_Ema | CAGTTATACT<br>TATTTATCAG | TCTTTTTCAA<br>ATTTCCACCT  | ACCCAGAGAC<br>ATTACACATT | TTCCAGCATT<br>CCCTGTCATC | TGGACCCTTC<br>AGTTTCTT |
| FOR_DS1535 | CAGTTATACT<br>TATTTATCAG | TCTTTTTCAA<br>ATTTCCACCT  | ACCCAGAGAC<br>ATTACACATT | TTCCAGCATT<br>CCCTGTCATC | TGGACCCTTC<br>AGTTTCTT |
| MAM1_SP134 | CAGTTATACT<br>TATTTATCAG | TCTTTTTCAA<br>ATTTCCACCT  | ACCCAGAGAC<br>ATTACACATT | TTCCAGCATT<br>CCCTGTCATC | TGGACCCTTC<br>AGTTTCTT |
| MAST_A212_ | TAGTTATATT<br>TATTTATCAG | TTTTTTTTCAA<br>ATTTCCACCT | ACCCAGAGAC<br>ATTACACATT | TTCCAGCATT<br>CCCTGTCATC | TGGACCCTTC<br>AGTTTCTT |
| SAV1_SE210 | CAGTTATACT<br>TATTTATCAG | TCTTTTTCAA<br>ATTTCCACCT  | ACCCAGAGAC<br>ATTACACATT | TTCCAGCATT<br>CCCTGTCATC | TGGACCCTTC<br>AGTTTCTT |

1 1 1 1 1  
5 105

|            |                                   |                          |                          |                          |                          |
|------------|-----------------------------------|--------------------------|--------------------------|--------------------------|--------------------------|
| ASIAN2_Ema | TGGCCTGTCT<br>TCCACGCTCC<br>GGCTC | GCCACCCTCC<br>CTGGCTGGTC | ATTT-CTCCC<br>AATACCCACC | CTTCAATCCA<br>CACTTTCAAG | CCAGCCATCT<br>TTCTAACAGT |
| FOR_DS1535 | TGGCCTGTCT<br>TCCACGCTCC<br>GGCTC | GCCACCCTCC<br>CTGGCTGGTC | ATTT-CTTCC<br>AATACCCACC | CTTCAATCCA<br>CACTTTCAAG | CCAGCCATCT<br>TTCTAACAGT |
| MAM1_SP134 | TGGCCTGTCT<br>TCCACGCTCC<br>GGCTC | GCCACCCTCC<br>CTGGCTGGTC | ATTT-CTCCC<br>AATACCCACC | CTTCAATCCA<br>CACTTTCAAG | CCAGCCATCT<br>TTCTAACAGT |
| MAST_A415_ | TGGCCTCTCT<br>GCCACGCTCC<br>GGCTC | GCCACCCTCC<br>-TGGCTGGTC | ATTTTCTTCC<br>ACTACCCACC | CTTCAATCCA<br>CACTTTCAAG | CCAGCCATCT<br>TTCTAACAGT |
| SAV1_SE210 | TGGCCTGTCT<br>TCCACGCTCC<br>GGCTC | GCCACCCTCC<br>CTGGCTGGTC | ATTT-CTCCC<br>AATACCCACC | CTTCAATCCA<br>CACTTTCAAG | CCAGCCATCT<br>TTCTAACAGT |

1 1 1 1 1  
5 97

|            |            |            |            |            |            |
|------------|------------|------------|------------|------------|------------|
| ASIAN2_Ema | CCCAAGGAGC | TGGATCCCTC | TGCTGTGCTC | CCCTTGGATT | GTCTTCTTGC |
|            | ATTTGTGTTT | TTTGATGCTA | ACTGGTGTGG | CTACTTGCAC | CGGAGAG    |
| FOR_DS1535 | CCCAAGGAGC | TGGATCCCTC | TGCTGTGCTC | CCCTTGGATT | GTCTTCTTGC |
|            | ATTTGTGTTT | TTTGATGCTA | ACTGGTGTGG | CTACTTGCAC | CGGAGAG    |
| MAM1_SP134 | CCCAAGGAGC | TGGATCCCTC | TGCCGTGCTC | CCCTTGGATT | GTCTTCTTGC |
|            | ATTTGTGTTT | TTCGATGCTA | ACTGGTGTGG | CTACTTGCAC | CGGAGAG    |
| MAST_A355_ | TCCAAGGAGC | TGGATCCCTC | TGCTGTGCTC | CCCTTGGATT | GTCTTCTTGC |
|            | ATTTGTGTTT | TTTGATGCTA | ACTGGTGTGG | CTACTTGCAC | CGGAGAG    |
| SAV1_SE210 | CCCAAGGAGC | TGGATCCCTC | TGCTGTGCTC | CCCTTGGATT | GTCTTCTTGC |
|            | ATTTGTGTTT | TTTGATGCTA | ACTGGTGTGG | CTACTTGCAC | CGGAGAG    |

1 1 1 1 1  
5 95

|            |            |            |            |            |            |
|------------|------------|------------|------------|------------|------------|
| ASIAN2_Ema | TAAGAACCTC | TGTAACAGTG | GGAGGAGAGT | ATCATGGCCA | AGAAAGCTCT |
|            | GCTCAAGAGA | AGGCACAGAG | CCTGGGCACA | GACGCTGGGC | CAGAG      |
| FOR_DS1535 | TAAGAACCTC | TGTAACAGTG | GGAGGAGAGT | ATCATGGCCA | AGAAAGCTCT |
|            | GGTCAAGAGA | AGGCACAGAG | CCTGGGCACA | GACGCTGGGC | CAGAG      |
| MAM1_SP134 | TAAGAACCTC | TGTAACAGTG | GGAGGAGAGT | ATCATGGCCA | AGAAAGCTCT |
|            | GCTCAAGAGA | AGGCACAGAG | CCTGGGCACA | GACGCTGGGC | CAGAG      |
| MAST_A214_ | TAAGAACCTC | TGTAACAGTG | GGAGGAGAGT | ATCATGGCCA | AGAAAGCTCT |
|            | GATCAAGAGA | AGGCACAGAG | CCTGGGCACA | GACGCCGGGC | CAGAA      |
| SAV1_SE210 | TAAGAACCTC | TGTAACAGTG | GGAGGAGAGT | ATCATGGCCA | AGAAAGCTCT |
|            | GCTCAAGAGA | AGGCACAGAG | CCTGGGCACA | GACGCTGGGC | CAGAG      |

1 1 1 1 1  
5 112

|            |            |            |            |            |            |
|------------|------------|------------|------------|------------|------------|
| ASIAN2_Ema | CAGTAAAACA | CGTGTAAAG  | ATTACAAATT | GTTTAACAAG | TTTTGGCAAA |
|            | CAAGTCCCCT | GGTGGTCTTG | AAATTTCTGA | GAAGCAGATG | GAAGAGGTAC |
|            | AGTTTTATAG | AT         |            |            |            |
| FOR_DS1535 | CAGTAAAACA | CGTGTAAAG  | ATTACAAATT | GTTTAACAAG | TTTTGGCAAA |
|            | CAAGTCCCCT | GGTGGTCTTG | AAATTTCTGA | GAAGCAGATG | GAAGAGGTAC |
|            | AGTTTTATAG | AT         |            |            |            |
| MAM1_SP134 | CAGTAAAACA | CGTGTAAAG  | ATTACAAATT | GTTTAACAAG | TTTTGGCAAA |
|            | CAAGTCCCCT | GGTGGTCTTG | AAATTTCTGA | GAAGCAGATG | GAAGAGGTAC |
|            | AGTTTTATAG | AT         |            |            |            |
| MAST_A215_ | TAGTAAAACA | CGTGTAAAG  | ATTACAAATT | GTTTAACAAG | TTTTGGCAAA |
|            | CAAGTCCCCT | GGTGGTCTTG | AAATTTCTGA | GAAGCAGATG | GAAGAGGTAC |
|            | AGTTTTATAG | AT         |            |            |            |
| SAV1_SE210 | CAGTAAAACA | CGTGTAAAG  | ATTACAAATT | GTTTAACAAG | TTTTGGCAAA |
|            | CAAGTCCCCT | GGTGGTCTTG | AAATTTCTGA | GAAGCAGATG | GAAGAGGTAC |
|            | AGTTTTATAG | AT         |            |            |            |

1 1 1 1 1  
5 93

|            |            |            |            |            |            |
|------------|------------|------------|------------|------------|------------|
| ASIAN2_Ema | CTCAGAGTGG | GGGCCTAACG | CCAGATGTAG | TGCTCTGGTG | AGTCCAGGGT |
|            | GGGGTGTTAC | TCAGCCTACA | ATCCCCCACC | CACACTTCGC | CAG        |
| FOR_DS1535 | CTCAGAGTGG | GGGCCTAATG | CCAGATGTAG | TGCTCTGGTG | AGTCCAGGGT |
|            | GGGGTGTTAC | TCAGCCTACA | ATCCCCCACC | CACACTTCGC | CAG        |
| MAM1_SP134 | CTCAGAGTGG | GGGCCTAACA | CCAGATGTAG | TGCTCTGGTG | AGTCCAGGGT |
|            | GGGGTGTTAC | TCAGCCTACA | ATCCCCCACC | CACACTTCGC | CAG        |
| MAST_A216_ | CTCAGAGTGG | GG-CCTAACA | CCAGATGTAG | TGCTCTGGTG | AGTCCAGGGT |
|            | GGGGTGTTAC | TCAGCCCACA | GTCCCCCACC | CACACTTCCC | CAA        |
| SAV1_SE210 | CTCAGAGTGG | GGGCCTAATG | CCAGATGTAG | TGCTCTGGTG | AGTCCAGGGT |
|            | GGGGTGTTAC | TCAGCCTACA | ATCCCCCACC | CACACTTCGC | CAG        |

1 1 1 1 1  
5 100

|            |            |            |            |            |            |
|------------|------------|------------|------------|------------|------------|
| ASIAN2_Ema | GATATGTCCT | GGAGAGGGCT | CTGGAAGATG | CCCTTTCTCA | GGGATGTTGG |
|            | AGAAAGGCAG | CCACCTGCTA | TGGGGCCTGG | CATTCTTGCC | AGGGGCTGGG |
| FOR_DS1535 | GATATGTCCT | GGAGAGGGCT | CTGGAAGATG | CCCTTTCTCA | GGGATGTTGG |
|            | AGAAAGGCAG | CCACCTGCTA | TGGGGCCTGG | CATTCTTGCC | AGGGGCTGGG |
| MAM1_SP134 | GATATGTCCT | GGAGAGGGCT | CTGGAAGATG | CCCTTTCTCA | GGGATGTTGG |
|            | AGAAAGGCAG | CCACCYGCTA | TGGGGCCTGG | CATTCTTGCC | AGGGGCTGGG |

|            |            |            |            |            |            |
|------------|------------|------------|------------|------------|------------|
| MAST_A217_ | GATATGTCCT | GGAGAGGGCT | CTGGAAGATG | CCCTTTCTCA | GGGATGTTGG |
| SAV1_SE210 | AGAAAAGCAG | CCACCTGCTA | TGGGGCCTGG | CATTCTTGCC | AGGGGCTGGG |
|            | GATATGTCCT | GGAGAGGGCT | CTGGAAGATG | CCCTTTCTCA | GGGATGTTGG |
|            | AGAAAAGCAG | CCACCTGCTA | TGGGGCCTGG | CATTCTTGCC | AGGGGCTGGG |
|            | 1 1 1 1 1  |            |            |            |            |
|            | 5 99       |            |            |            |            |
| ASIAN2_Ema | CTGGTCCTCC | CTCGTTTCTG | GACCTTTGCT | CATCCTGCCC | TCCCTATAAT |
| FOR_DS1535 | GGCCGCCTTT | TCCCCACTCC | TCCTATCCCA | ATCTCAGTGC | TTTCTGTCT  |
|            | CTGGTCCTCC | CTCGTTTCTG | GACCTTTGCT | CATCCTGCCC | TCCCTATAAT |
|            | GGCCGCCTGT | TCCCCACTCC | TCCTATCCCA | ATCTCAGTGC | TTTCTGTCT  |
| MAM1_SP134 | CTGGTCCTCC | CTCGTTTCTG | GACCTTTGCT | CATCCTGCCC | TCCCTATAAT |
|            | GGCCGCCTTT | TCCCCACTCC | TCCTATCCCA | ATCTCAGTGC | TTTCTGTCT  |
| MAST_A219_ | CTGGTCCTCC | CTCGTTTCTG | GACCTTTGCT | CATCCTGCCC | TCCCTATAAT |
|            | GGCCGCCTGT | TCCCCACTCC | TCCTATCCCA | ATCTCAGTGC | TTTCTGTCT  |
| SAV1_SE210 | CTGGTCCTCC | CTCGTTTCTG | GACCTTTGCT | CATCCTGCCC | TCCCTATAAT |
|            | GGCMGCCTGT | TCCCCACTCC | TCCTATCCCA | ATCTCAGTGC | TTTCTGTCT  |
|            | 1 1 1 1 1  |            |            |            |            |
|            | 5 103      |            |            |            |            |
| ASIAN2_Ema | GGGCGACCTT | --CTCGCTCT | CTGGCTAAGC | CCATGGACCT | CTTACAACCT |
|            | GTTCACGTGA | CGTGGGTTGT | ACAAATACTC | AGGCCACCC  | AATGTTCTCC |
|            | TTC        |            |            |            |            |
| FOR_DS1535 | GGGCGACCTT | --CTCGCTCT | CTGGCTAAGC | CCATGGACCT | CTCACAACCT |
|            | GTTCACGTGA | CGTGGGTTGT | ACAAATACTC | AGGCCACCC  | AATGTTCTCC |
|            | TTC        |            |            |            |            |
| MAM1_SP134 | GGGCGACCTT | --CTCGCTCT | CTGGCTAAGC | CCATGGACCT | CTTACAACCT |
|            | GTTCACGTGA | CGTGGGTTGT | ACAAATACTC | AGGCCACCC  | AATGTTCTCC |
|            | TTC        |            |            |            |            |
| MAST_A220_ | CGTCGACCTC | GCCTCGCTCT | CTGGCTAAGC | CCATGGACCT | CTCGCAACCT |
|            | GTTACATAAA | TGTGGGTTAT | ACAAATACTC | AGGCCACCC  | AATGTTCTCC |
|            | TTC        |            |            |            |            |
| SAV1_SE210 | GGGCGACCTT | --CTCGCTCT | CTGGCTAAGC | CCATGGACCT | CTTACAACCT |
|            | GTTCACGTGA | CGTGGGTTGT | ACAAATACTC | AGGCCACCC  | AATGTTCTCC |
|            | TTC        |            |            |            |            |
|            | 1 1 1 1 1  |            |            |            |            |
|            | 5 105      |            |            |            |            |
| ASIAN2_Ema | AGTTTTCTCT | TCCAAGGCC  | CTGAGTTCTT | CTGGCTTTTA | GACATCAAAG |
|            | CGTTATGTG  | CCTGTTCTTT | TCAGAAGCTG | CTCTCTCTCC | CGAGAGACTT |
|            | TTCTT      |            |            |            |            |
| FOR_DS1535 | AGTTTTCTCT | TCCAAGGCC  | CTGAGTTCTT | CTGGCTTTTA | GACATCAAAG |
|            | CGTTATGTG  | CCTGTTCTTT | TCAGAAGCTG | CTCTCTCTCC | CGAGAGACTT |
|            | TTCTT      |            |            |            |            |
| MAM1_SP134 | AGTTTTCTCT | TCCAAGGCC  | CTGAGTTCTT | CTGGCTTTTA | GACATCAAAG |
|            | CGTTATGTG  | CCTGTTCTTT | TCAGAAGCTG | CTCTCTCTCC | CGAGAGACTT |
|            | TTCTT      |            |            |            |            |
| MAST_A294_ | AGTTTTCTCT | TCTAAGGCC  | CTGAGTTCTT | CTGGCTTTTA | GACATCAAAG |
|            | CGTTATGTG  | CCTGTTCTTT | TCAGAAGCTG | CTCTCTCTCC | CAAGAGACTT |
|            | TTCTT      |            |            |            |            |
| SAV1_SE210 | AGTTTTCTCT | TCCAAGGCC  | CTGAGTTCTT | CTGGCTTTTA | GACATCAAAG |
|            | CGTTATGTG  | CCTGTTCTTT | TCAGAAGCTG | CTCTCTCTCC | CGAGAGACTT |
|            | TTCTT      |            |            |            |            |
|            | 1 1 1 1 1  |            |            |            |            |
|            | 5 95       |            |            |            |            |
| ASIAN2_Ema | TGAGCTTCAG | GTGCTGCTGG | GAGGGGCCAT | CAAGGCAATC | CCTCCCAGGG |
|            | AGGAGGGCTG | GTTCTGTGGG | CAACGCGGCC | AGAGTGAGTA | ACCAG      |
| FOR_DS1535 | TGAGCTTCAG | GTGCTGCTGG | GAGGGGCCAT | CAAGGCAATC | CCTCCCAGGG |
|            | AGGAGGGCTG | GTTCTGTGGG | CAACKCGGCC | AGAGTGAGTA | ACCAG      |
| MAM1_SP134 | TGAGCTTCAG | GTGCTGCTGG | GAGGGGCCAT | CAAGGCAATC | CCTCCCAGGG |
|            | AGGAGGGCTG | GTTCTGTGGG | CAACGCGGCC | AGAGTGAGTA | ACCAG      |
| MAST_A222_ | TGAGCTTCAG | GTGCTGCTGG | GAGGGGCCAT | CAAGGCAATC | CCTCCCAGGG |
|            | AGGAGGGCTG | GTTCTGTGGG | CAAAGCTGCC | AGAGTGAGTA | ACCAG      |
| SAV1_SE210 | TGAGCTTCAG | GTGCTGCTGG | GAGGGGCCAT | CAAGGCAATC | CCTCCCAGGG |
|            | AGGAGAGCTG | GTTCTGTGGG | CAACGTGGCC | AGAGTGAGTA | ACCAG      |

1 1 1 1 1  
5 91

|            |            |            |            |            |            |
|------------|------------|------------|------------|------------|------------|
| ASIAN2_Ema | TCAATATCTC | CTCACCTGGA | CCTCAGACCC | TTGTTTTCCA | TTCCACAAAG |
|            | CCACAGGGAC | AAGATTGAGC | CTCTCCCACC | CCAGTGCACA | R          |
| FOR_DS1535 | TCAATATCTC | CYCACCTGGA | CMTCAGACCC | TTGTTTTCCA | TTCCACAAAS |
|            | CCACAGGGAC | AAGATTGAGC | CTCTCCCACC | CCAGTGCACA | G          |
| MAM1_SP134 | TCAATATCTC | CTCACCTGGA | CCTCAGACCC | TTGTTTTCCA | TTCCACAAAG |
|            | CCACAGGGAC | AAGATTGAGC | CTCTCCCACC | CCAGTGCACA | G          |
| MAST_A223_ | TCAATATCTC | CTCACCTGGA | CCTCAGACCC | TTGTTTTCCA | TTCCACAAAG |
|            | CCACAGGGCC | AAGATTGAGC | CACTCCCACC | CCAGTGCACA | G          |
| SAV1_SE210 | TCAATATCTC | CTCACCTGGA | CCTCAGACCC | TTGTTTTCCA | TTCCACAAAG |
|            | CCACAGGGAC | AAGATTGAGC | CTCTCCCACC | CCAGTGCACA | G          |

1 1 1 1 1  
5 134

|            |            |              |            |            |            |
|------------|------------|--------------|------------|------------|------------|
| ASIAN2_Ema | CACCTGTTCT | ATATTTTGTGTA | TTACCTGTAG | TGGATAAAAA | ATAGCAGAGC |
|            | AAAAACTAGG | CTTTCATCAG   | -CTTTTTTGT | TTTGTTTTGT | TTT-----CA |
|            | GGGACAAAAC | ATTTAAACAA   | ACATGTTTTT | CTTT       |            |
| FOR_DS1535 | CACCTGTTCT | ATATTTTGTGTA | TTACCTGTAG | TGGATAAAAA | ATAGCAGAGC |
|            | AAAAACTAGG | CTTTCATCAG   | -CTTTTTTGT | TTTGTTTTGT | TTTGTTTTCA |
|            | GGGACAAAAC | ATTTAAACAA   | ACATATTTTT | CTTT       |            |
| MAM1_SP134 | CACCTGTTCT | ATATTTTGTGTA | TTACCTGTAG | TGGATAAAAA | ATAGCAGAGC |
|            | AAAAACTAGG | CTTTCATCAG   | -CTTTTTTGT | TTTGTTTTGT | TTTGTTTTCA |
|            | GGGACAAAAC | ATTTAAACAA   | ACATGTTTTT | CTTT       |            |
| MAST_A224_ | CACCTGTTCT | ATATTTTGTGTA | TTACCTGTAG | TGGATA---- | ---GCAGAGC |
|            | AAAAACTAGG | CTTTCATCAG   | TCTTTTTTGT | TTTGTTTTGT | TTTGTTTTCA |
|            | GGGACAAAAC | ATTTAAACAA   | ACATGTTTTT | CTTT       |            |
| SAV1_SE210 | CACCTGTTCT | ATATTTTGTGTA | TTACCTGTAG | TGGATAAAAA | ATAGCAGAGC |
|            | AAAAACTAGG | CTTTCATCAG   | -CTTTTTTGT | TTTGTTTTGT | TTT-----CA |
|            | GGGACAAAAC | ATTTAAACAA   | ACATGTTTTT | CTTT       |            |

1 1 1 1 1  
5 96

|            |            |            |            |             |            |
|------------|------------|------------|------------|-------------|------------|
| ASIAN2_Ema | GAACTAAGCT | GAGTTCATC  | AATACACCAG | GCTATTTTCAG | GCCTCCCTAA |
|            | CTTTGCTCAA | GCTGCTCCCC | AGGGCTGCAA | TCCCCTTCTT  | ATCTCA     |
| FOR_DS1535 | GAACTAAGCT | GAGTTCATC  | AATACACCAG | GCTATTTTCAG | GCCTCCCTAA |
|            | CTTTGCTCAA | GCTGCTCCCC | AGGGCTGCAA | TCCCCTTCTT  | ATCTCA     |
| MAM1_SP134 | GAACTAAGCT | GAGTTCATC  | AATACACCAG | GCTATTTTCAG | GCCTCCCTAA |
|            | CTTTGCTCAA | GCTGCTCCCC | AGGGCTGCAA | TCCCCTTCTT  | ATCTCA     |
| MAST_A357_ | GAACTAAGCT | GAGTTCATC  | AATACACCAG | GTTATTTTCAG | GCTTCACTAA |
|            | CTTTGCTCAA | GCTGCTCCCC | AGGGCTGCAA | TCCCCTTCTT  | ATCTCA     |
| SAV1_SE210 | GAACTAAGCT | GAGTTCATC  | AATACACCAG | GCTATTTTCAG | GCCTCCCTAA |
|            | CTTTGCTCAA | GCTGCTCCCC | AGGGCTGCAA | TCCCCTTCTT  | ATCTCA     |

1 1 1 1 1  
5 107

|            |            |            |            |            |            |
|------------|------------|------------|------------|------------|------------|
| ASIAN2_Ema | ACTGTTGCCG | GCACCTGGGG | AGGGGGCTCA | GCTGGAGGAG | TCAGTTCTTG |
|            | CAGCCTGCTT | CCCCTCCACC | CTACTACGCC | TTCCACAGGA | ATTGGGGTCG |
|            | CCTGCTG    |            |            |            |            |
| FOR_DS1535 | ACTGTTGCCG | GCACCTGGGG | AGGGGGCTCA | GCTGGAGGAG | TCAGTTCTTG |
|            | CAGCCTGCTT | CCCCTCCGCC | CTACTACGCC | TTCCACAGGA | ATTGGGGTCG |
|            | CCTGCTG    |            |            |            |            |
| MAM1_SP134 | ACTGTTGCCG | GCACCTGGGG | AGGGGGCTCA | GCTGGAGGAG | TCAGTTCTTG |
|            | CAGCCTGCTT | CCCCTCCGCC | CTACTACGCC | TTCCACAGGA | ATTGGGGTCG |
|            | CCTGCTG    |            |            |            |            |
| MAST_A225_ | ACTGTTGCCG | GCACCTGGGG | AGGGGGCTCA | GCTGGAGGAG | TCAGTTCTTC |
|            | CAGCCTGCTT | CCCCTCCGCC | CTACTACGCC | TTCCACAAGA | ATTGGGATCG |
|            | CCTACTA    |            |            |            |            |
| SAV1_SE210 | ACTGTTGCCG | GCACCTGGGG | AGGGGGCTCA | GCTGGAGGAG | TCAGTTCTTG |
|            | CAGCCTGCTT | CCCCTCCGCC | CTACTACGCC | TTCCACAGGA | ATTGGGGTCG |
|            | CCTGCTG    |            |            |            |            |

1 1 1 1 1  
5 101

|            |            |            |            |            |            |
|------------|------------|------------|------------|------------|------------|
| ASIAN2_Ema | CACTCAGAAC | ACGACTGYGG | AAGAGCTGCC | TCCTTAATGA | CGCCCTTACT |
|            | GAGGCAGACG | GATTAAAGCC | TTCGGGACCT | TCATTTGCTG | ATGTGCCACG |
|            | A          |            |            |            |            |

|            |                               |                         |                          |                          |                          |
|------------|-------------------------------|-------------------------|--------------------------|--------------------------|--------------------------|
| FOR_DS1535 | CACTCAGAAC<br>GAGGCAGACG<br>A | ACGACTGCRG<br>GATTAAGCC | AAGAGCTGCC<br>TTCGGGACCT | TCCTTAATGA<br>TCATTTGCTG | CGCCCTTACT<br>ATGTGCCACG |
| MAM1_SP134 | CACTCAGAAC<br>GAGGCAGACG<br>A | ATGACTGCGG<br>GATTAAGCC | AAGAGCTGCC<br>TTCGGGACCT | TCCTTAATGA<br>TCATTTAATG | CGCCCTTACT<br>ATGTGCCACG |
| MAST_A418_ | TACTCAGAAC<br>GAGGCAGACG<br>A | ACGACTGGGG<br>GATTAAGCC | AAGAGCTGCC<br>TTCGGGACCT | TCCTTAATGA<br>TCATTTGCTG | CGCCCTTACT<br>ATGTGCCATG |
| SAV1_SE210 | CACTCAGAAC<br>GAGGCAGACG<br>A | ACGACTGCGG<br>GATTAAGCC | AAGAGCTGCC<br>TTCGGGACCT | TCCTTAATGA<br>TCATTTGCTG | CGCCCTTACT<br>ATGTGCCACG |

1 1 1 1 1  
5 96

|            |                          |                          |                          |                          |                      |
|------------|--------------------------|--------------------------|--------------------------|--------------------------|----------------------|
| ASIAN2_Ema | AGTAGAGAGA<br>AAGGTACAAG | AACAGGGAAA<br>GGATGAGGCT | GACTTTCCAG<br>GAATGCAACA | GTGACAGGAA<br>TACCAGCTCT | CCGGAGAAGC<br>ATCCAG |
| FOR_DS1535 | AGTAGAGAGA<br>AAGGTACAAG | AACAGGGAAA<br>GGATGAGGCT | GACTTTCCAG<br>GAATGCAACA | GTGACAGGAA<br>TACCGGCTCT | CCGGAGAAGC<br>ATCCAG |
| MAM1_SP134 | AGTAGAGAGA<br>AAGGTACAAG | AACAGGGAAA<br>GGATGAGGCT | GACTTTCCAG<br>GAATGCAACA | GTGACAGGAA<br>TACCAGCTCT | CCGGAGAAGC<br>ATCCAG |
| MAST_A227_ | AGCAGAGAGA<br>AAGGTACAAG | AACAGGGAAA<br>GGATGAGGCT | GACTTTCCAG<br>GAATGCAACA | GTGACAGGAA<br>TACCGGCTCT | CCGGAGAAGC<br>ATCCAG |
| SAV1_SE210 | AGTAGAGAGA<br>AAGGTACAAG | AACAGGGAAA<br>GGATGAGGCT | GACTTTCCAG<br>GAATGCAACA | GTGACAGGAA<br>TACCGGCTCT | CCGGAGAAGC<br>ATCCAG |

1 1 1 1 1  
5 99

|            |                          |                          |                          |                          |                         |
|------------|--------------------------|--------------------------|--------------------------|--------------------------|-------------------------|
| ASIAN2_Ema | TGTGGTACTG<br>ATCCATATTT | TGCCAAGCCT<br>GACAGATGGG | TCCACATATT<br>CAGTCTGAGG | ACTACGTAGC<br>CCTTCAGGAT | TACTCCAATT<br>TTAAAAACT |
| FOR_DS1535 | TGTGGTACTG<br>ATCCATATTT | TGCCAAGCCT<br>GACAGATGGG | TCCACATATT<br>CAGTCTGAGG | ACTACGTAGC<br>CCTTCAGRAT | TACTCCAATT<br>TTAAAAACT |
| MAM1_SP134 | TGTGGTACTG<br>ATCCATATTT | TGCCAAGCCT<br>GACAGATGGG | TCCACATATT<br>CAGTCTGAGG | ACTACGTAGC<br>CCTTCAGRAT | TACTCCAATT<br>TTAAAAACT |
| MAST_A229_ | TGTGGTACTG<br>ATCCATATTT | TGCCAAGCCT<br>GACAGATGGG | TCCACATATT<br>CAGTCTGAGG | ACTACATAGC<br>CCTTCAGAAG | TACTCCAATT<br>TTAAAAACT |
| SAV1_SE210 | TGTGGTACTG<br>ATCCATATTT | TGCCAAGCCT<br>GACAGATGGG | TCCACATATT<br>CAGTCTGAGG | ACTACGTAGC<br>CCTTCAGAAT | TACTCCAATT<br>TTAAAAACT |

1 1 1 1 1  
5 104

|            |                                  |                          |                          |                          |                          |
|------------|----------------------------------|--------------------------|--------------------------|--------------------------|--------------------------|
| ASIAN2_Ema | CCCCGACCCC<br>CCCTTGGCGT<br>GCTT | TCCGTTGAAA<br>CCTCAACTCT | TTCACCTGTC<br>ACTGTCTGAC | -AGG-CTGCT<br>CGACTGCCTG | GAAGCCCTTG<br>AGCAGCAGGT |
| FOR_DS1535 | CCCCGACCCC<br>CCCTTGGCGT<br>GCTT | TCCGTTGAAA<br>CCTCAACTCT | TTCACCTGTC<br>ACTGTCTGAC | -AGG-CTGCT<br>CGACTGCCTG | GAAGCCCTTG<br>AGCAGCAGGT |
| MAM1_SP134 | CCCCGACCCC<br>CCCTTGGCGT<br>GCTT | TCCGTTGAAA<br>CCTCAACTCT | TTCACCTGTC<br>ACTGTCTGAC | -AGG-CTGCT<br>CGACTGCCTG | GAAGCCCTTG<br>AGCAGCAGGT |
| MAST_A299_ | CCCCGACCCC<br>CCCTTGGCGT<br>GCTT | TCCGTTGAAA<br>CCTCAACTCT | TTCACCTGTT<br>ACTGTCTGAC | -AGG-CTGCT<br>CGACTGCCTG | GAAGCCCTTG<br>AGCAGCAGGT |
| SAV1_SE210 | CCCCGACCCC<br>CCCTTGGCGT<br>GCTT | TCCGTTGAAA<br>CCTCAACTCT | TTCACCTGTC<br>ACTGTCTGAC | -AGG-CTGCT<br>CGACTGCCTG | GAAGCCCTTG<br>AGCAGCAGGT |

1 1 1 1 1  
5 102

|            |                                 |                          |                          |                          |                          |
|------------|---------------------------------|--------------------------|--------------------------|--------------------------|--------------------------|
| ASIAN2_Ema | GTCACCTTGCC<br>CCCCTGACAG<br>GT | TCAGAAACAC<br>CAGAGTGATC | AGGCGAAGAT<br>ACCCATGGGC | TGAACTGGGA<br>AGCCCTCTTA | CCTTGCCCTG<br>ACCTCCCTGA |
| FOR_DS1535 | GTCACCTTGCC<br>CCCCTGACAG<br>GT | TCAGAAACAC<br>CAGAGTGATC | AGGCGAAGAY<br>ACCCATGGGC | TGAACTGGGA<br>AGCCCTCTTA | CCTTGCCCTG<br>ACCTCCCTGA |
| MAM1_SP134 | GTCACCTTGCC<br>CCCCTGACAG       | TCAGAAACAC<br>CAGAGTGATC | AGGCGAAGAT<br>ACCCATGGGC | TGAACTGGGA<br>AGCCCTCTTA | CCTTGCCCTG<br>ACCTCCCTGA |

|            |                                 |                          |                          |                          |                          |
|------------|---------------------------------|--------------------------|--------------------------|--------------------------|--------------------------|
| MAST_A300_ | GT<br>GTCACCTTGCC<br>CCCCTGACAA | TTAGAAACAC<br>CAGAGTGATC | AGGCGAAGAT<br>ACCCATAGGC | TGAAGTGGGA<br>AGCCCTCTTA | CCTTGCCCTG<br>ACCTCCCTGA |
| SAV1_SE210 | GT<br>GTCACCTTGCC<br>CCCCTGACAG | TCAGAAACAC<br>CAGAGTGATC | AGGCGAAGAT<br>ACCCATGGGC | TGAACTGGGA<br>AGCCCTCTTA | CCTTGCCCTG<br>ACCTCCCTGA |

1 1 1 1 1  
5 92

|            |                          |                          |                          |                          |                  |
|------------|--------------------------|--------------------------|--------------------------|--------------------------|------------------|
| ASIAN2_Ema | TAACTAGGAA<br>TATTCGTGGA | ACCTAGAAGA<br>TGACAGAGCC | ATAGTTTCTG<br>TATTTTGCAG | CTTGTATGAC<br>TTTCTATTCA | AGGGATCTTT<br>CA |
| FOR_DS1535 | TAACTAGGAA<br>TATTCGTGGA | ACCTAGAAGA<br>TGACAGAGCC | ATAGTTTCTG<br>TATTTTGCAG | CTTGTATGAC<br>TTTCTATTCA | AGGGATCTTT<br>CA |
| MAM1_SP134 | TAACTAGGAA<br>TATTCGTGGA | ACCTAGAAGA<br>TGACAGAGCC | ATAGTTTCTG<br>TATTTTGCAG | CTTGTATGAC<br>TTTCTATTCA | AGGGATCTTT<br>CA |
| MAST_A301_ | TAATTAGGAA<br>TATTCATGAA | ATCTAGAAGA<br>TGACAGAGCC | ATAGTTTCTG<br>TATTTTGCAG | CTTGTATGAC<br>TTTCTATTCA | AGGGATCTTT<br>CA |
| SAV1_SE210 | TAACTAGGAA<br>TATTCGTGGA | ACCTAGAAGA<br>TGACAGAGCC | ATAGTTTCTG<br>TATTTTGCAG | CTTGTATGAC<br>TTTCTATTCA | AGGGATCTTT<br>CA |

1 1 1 1 1  
5 96

|            |                          |                          |                          |                          |                      |
|------------|--------------------------|--------------------------|--------------------------|--------------------------|----------------------|
| ASIAN2_Ema | TATATGCACA<br>GTTTCCTACA | TACCGTAGTC<br>GAGTAGAACT | TAACCC-AAA<br>GCCCCATAGA | AAACCCAGGG<br>GTTTCCAAGG | CCGCCGAGTT<br>AGTGCC |
| FOR_DS1535 | TATATGCACA<br>GTTTCCTACA | TACCGTAGTC<br>GAGTAGAACT | TAACCC-AAA<br>GCCCCATAGA | AA-CCCAGGG<br>GTTTCCAAGG | CCGCCGAGTT<br>AGTGCC |
| MAM1_SP134 | TATATGCACA<br>GTTTCCTACA | TACCGTAGTC<br>GAGTAGAACT | TAACCC-AAA<br>GCCCCATAGA | AAACCCAGGG<br>GTTTCCAAGG | CCGCCGAGTT<br>AGTGCC |
| MAST_A302_ | TATATGCACA<br>GTTTCCTACA | TACCGTAGTC<br>GAGTAGAACT | TAACCC-AAA<br>GCCCCATAGA | AAACCCAGTG<br>ATTTCCAAGG | CCGCCGAGTT<br>AGTGCC |
| SAV1_SE210 | TATATGCACA<br>GTTTCCTACA | TACCGTAGTC<br>GAGTAGAACT | TAACCCAAA<br>GCCCCATAGA  | AA-CCCAGGG<br>GTTTCCAAGG | CCGCCGAGTT<br>AGTGCC |

1 1 1 1 1  
5 93

|            |                           |                          |                          |                          |                   |
|------------|---------------------------|--------------------------|--------------------------|--------------------------|-------------------|
| ASIAN2_Ema | CRTATCGGTG<br>CATGTACTION | CAACTTCCTG<br>CCTCAGGTAC | GGGCTCAGCC<br>GTGTGGTCTT | CACAGGTGCA<br>GGTCTGGCCT | GATCCCCTCC<br>GAT |
| FOR_DS1535 | CGTATCGGTG<br>CATGTACTION | CAACTTCCTG<br>CCTCAGGTAC | GGGCTCAGCC<br>GTGTGGTCTT | CACAGGTGCA<br>GGTMTGGCCT | GATCCCCTCC<br>GAT |
| MAM1_SP134 | CGTATCGGTG<br>CATGTACTION | CAACTTCCTG<br>CCTCAGGTAC | GGGCTCAGCC<br>GTGTGGTCTT | CACAGGTGCA<br>GGTCTGGCCT | GATCCCCTCC<br>GAT |
| MAST_A232_ | TGTATCGGTG<br>CATGTACTION | CAACTTCCTG<br>CCTCAGGTAC | GGGCTCAGCC<br>GTGTGGTCTT | CACAGGTGCA<br>AGTCTGGCCT | GATCCCCTCC<br>GGT |
| SAV1_SE210 | CGTATCGGTG<br>CATGTACTION | CAACTTCCTG<br>CCTCAGGTAC | GGGCTCAGCC<br>GTGTGGTCTT | CACAGGTGCA<br>GGTCTGGCCT | GATCCCCTCC<br>GAT |

1 1 1 1 1  
5 90

|            |                          |                         |                          |                          |            |
|------------|--------------------------|-------------------------|--------------------------|--------------------------|------------|
| ASIAN2_Ema | GAGTGGTGGG<br>CTGGAGGGGG | GTTACAGGT<br>-CAGGACTGC | CCCTCTGGCA<br>AGTCCGGGAG | GCCCAGGTGT<br>ACCTGTGCTG | GGGGATTGGA |
| FOR_DS1535 | GAGTGGTGGG<br>CTGGAGGGGG | GTTACAGGT<br>-CAGGACTGC | CCCTCTGGCA<br>AGTCTGGGAG | GCCCAGGTGT<br>ACCTGTGCTG | GGGGATTGGA |
| MAM1_SP134 | GAGTGGTGGG<br>CTGGAGGGGG | GTTACAGGT<br>-CAGGACTGC | CCCTCTGGCA<br>AGTCCGGGAG | GCCCAGGTGT<br>ACCTGTGCTG | GGGGATTGGA |
| MAST_A358_ | GAGTGGTGGG<br>CTGGAGGGGG | GTTACAGGT<br>GCAGGACTGC | CCCTCTGGCA<br>AGTCTGGGAG | GCCCAGGTG-<br>ACCTGTACTA | --GGATTGGA |
| SAV1_SE210 | GAGTGGTGGG<br>CTGGAGGAGG | GTTACAGGT<br>-CAGGACTGC | CCCTCTGGCA<br>AGTCTGGGAG | GCCCAGGTGT<br>ACCTGTGCTG | GGGGATTGGA |

1 1 1 1 1  
5 91

|            |                          |                          |                          |                          |                 |
|------------|--------------------------|--------------------------|--------------------------|--------------------------|-----------------|
| ASIAN2_Ema | GCAGCATCCC<br>A-TCGCCACG | TGCCGGGCCA<br>AGCTGCTGTG | AGGGCAGCTC<br>GTTTAGCACR | TGCCGAC-AC<br>CTGCAGACAT | CACCAAGTTC<br>G |
| FOR_DS1535 | GCAGCATCCC<br>A-TCGCCACG | TGCCGGGCCA<br>AGCTGCTGTG | AGGGCAGCTC<br>GTTTAGCACR | TGCCGAC-AC<br>CTGCAGACAT | CACCAAGTTC<br>G |

|            |                          |                          |                          |                          |                 |
|------------|--------------------------|--------------------------|--------------------------|--------------------------|-----------------|
| MAM1_SP134 | GCAGCATCCC<br>A-TCGCCACG | TGCCAGGCCA<br>AGCTGCTGTG | AGGGCAGCTC<br>GTTTAGCACG | TGCCGAC-AC<br>CTGCAGACAT | CACCAAGTTC<br>G |
| MAST_A304_ | ACAGCATCCC<br>AGTCGCCACG | TGCCAGGCCA<br>AGCTGCTGTG | AGGGCAGCTC<br>GTTTAGCACG | TGCCGACCAC<br>CTGCAAACAC | CACCAAGTTC<br>A |
| SAV1_SE210 | GCAGCATCCC<br>A-TCGCCACG | TGCCAGGCCA<br>AGCTGCTGTG | AGGGCAGCTC<br>GTTTAGCACG | TGCCGAC-AC<br>CTGCAGACAT | CACCAAGTTC<br>G |

1 1 1 1 1  
5 93

|            |                          |                          |                          |                          |                   |
|------------|--------------------------|--------------------------|--------------------------|--------------------------|-------------------|
| ASIAN2_Ema | TGATTTTTTA<br>CCCATCCCAA | TTTCTCCACC<br>CACTCCGGCA | CAAAAACCAA<br>ACCCATTCTT | ACTCGTATAC<br>CGGCGTTCCA | AGGCTCCCCA<br>AGT |
| FOR_DS1535 | TGATTTTTTA<br>CCCATCCCAA | TTTCTCCACC<br>CACTCCGGCA | CAAAAACCAA<br>ACCCATTCTT | ACTCGTATAC<br>CGGCGTTCCA | AGGCTCCCCA<br>AGT |
| MAM1_SP134 | TGATTTTTTA<br>CCCATCCCAA | TTTCTCCACC<br>CACTCCGGCA | CAAAAACCAA<br>ACCCATTCTT | ACTCGTATAC<br>CGGCGTTCCA | AGGCTCCCCA<br>AGT |
| MAST_A305_ | TGATTTTTTA<br>CCCATCCCAA | TTTCTCCACC<br>CACTCCGGCA | CAAAAATCAA<br>ACCCATTCTT | ACTCGTATAT<br>CGGCGTTCCA | AGGCTCCCCA<br>AGT |
| SAV1_SE210 | TGATTTTTTA<br>CCCATCCCAA | TTTCTCCACC<br>CACTCCGGCA | CAAAAACCAA<br>ACCCATTCTT | ACTCGTATAC<br>CGGCGTTCCA | AGGCTCCCCA<br>CGT |

1 1 1 1 1  
5 103

|            |                                 |                          |                          |                          |                          |
|------------|---------------------------------|--------------------------|--------------------------|--------------------------|--------------------------|
| ASIAN2_Ema | GTTAAACACC<br>CACATGTGGA<br>AGG | GGACCAGACC<br>TTGCATAGGG | ACAAGTGGG-<br>CTCGCTGGTG | TGGGAGCCAG<br>GTGAGCAACA | ACTGGAACTA<br>GAAACTGATT |
| FOR_DS1535 | GTTAAACACC<br>CACGTGTGGA<br>AGG | GGACCAGACC<br>TTGCATAGGG | ACAAGTGGGG<br>CTCGCTGGTG | TGGGAGCCGG<br>GTGAGCAACA | ACTGGAACTA<br>GAAACTGATT |
| MAM1_SP134 | GTTAAACACC<br>CATGTGTGGA<br>AGG | GGACCAGACC<br>TTGCATAGGG | ACAAGTGGG-<br>CTCGCTGGTG | TGGGAGCCAG<br>GTGAGCAACA | ACTGGAACTA<br>GAAACTGATT |
| MAST_A306_ | GTTAAACACC<br>CACGTGTGGA<br>AAA | GGACCAGACC<br>TTGCATAGGG | ATAAGTGGGG<br>CTCACTGGTG | TGGGAGCCGG<br>GTGAGCAACA | ACTGGAACTA<br>GAAACTGATT |
| SAV1_SE210 | GTTAAACACC<br>CACGTGTGGA<br>AGG | GGACCAGACC<br>TTGCATAGGG | ACAAGTGGGG<br>CTCGCTGGTG | TGGGAGCCAG<br>GTGAGCAACA | ACTGGAACTA<br>GAAACTGATT |

1 1 1 1 1  
5 109

|            |                                       |                          |                          |                          |                          |
|------------|---------------------------------------|--------------------------|--------------------------|--------------------------|--------------------------|
| ASIAN2_Ema | CAAATTTGGA<br>ATGAGGGATC<br>AGCTTCAGT | TGCCTCTCCA<br>GGCCAGCAGA | CGGGGATCCT<br>GAAGGGTCCT | AACTTTTCTT<br>TGTTGAAACC | CTATTCGACA<br>AAGGAAGAAG |
| FOR_DS1535 | CAAATTTGGA<br>GTGAGGGATC<br>AGCTTCAGT | TGCCTCTCCA<br>GGCCAGCAGA | CGGGGATCCT<br>GAAGGGTCCT | AACTTTTCTT<br>TGTTGAAACC | GTATTTGACA<br>AAGGAAGAAG |
| MAM1_SP134 | CAAATTTGGA<br>RTGAGGGATC<br>AGCTTCAGT | TGCCTCTCCA<br>GGCCAGCAGA | CGGGGATCCT<br>GAAGGGTCCT | AACTTTTCTT<br>TGTTGAAACC | STATTYGACA<br>AAGGAAGAAG |
| MAST_A233_ | CAAATTTGGA<br>GTGAGGGATC<br>AGCTTCAGT | TGCCTCTCCA<br>GGCCAGCAGA | CGGGGATCCT<br>GAAGGGTCCT | AACTTTTCTT<br>TGTTGAAACC | GTATTCGATG<br>AAGGAAGAAG |
| SAV1_SE210 | CAAATTTGGA<br>GTGAGGGATC<br>AGCTTCAGT | TGCCTCTCCA<br>GGCCAGCAGA | TGGGGATCCT<br>GAAGGGTCCT | AACTTTTCTT<br>TGTTGAAACC | GTATTTGACA<br>AAGGAAGAAG |

1 1 1 1 1  
5 94

|            |                          |                          |                          |                          |                    |
|------------|--------------------------|--------------------------|--------------------------|--------------------------|--------------------|
| ASIAN2_Ema | CTGGCAAGTG<br>TGGTGGTGTT | CTGGTGGGTG<br>CATCCGGCTC | TGGGTGTGCC<br>CTGCAGTCCC | CATCATCCTC<br>ACTGCCCACG | CTGCTGATCC<br>TGTC |
| FOR_DS1535 | CTGGCAAGTG<br>TGGTGGTGTT | CTGGTGGGTG<br>CATCCGGCTC | TGGGTGTGCC<br>CTGCAGTCCC | CATCATCCTC<br>ACTGCCCACG | CTRCTGATCC<br>TGTC |
| MAM1_SP134 | CTGGCAAGTG<br>TGGTGGTGTT | CTGGTGGGTG<br>CATCCGGCTC | TGGGTGTGCC<br>CTGCAGTCCC | CATCATCCTC<br>ACTGCCCACG | CTGCTGATCC<br>TGTC |
| MAST_A234_ | CTGGCAAGTG<br>TGGTGGTGTT | CTGGTGGGTG<br>CATCCGACTC | TGGGTGTGCC<br>CTGCAGTCCC | CATCATCCTC<br>ACTGCCCACG | CTGCTGATCC<br>TATC |
| SAV1_SE210 | CTGGCAAGTG               | CTGGTGGGTG               | TGGGTGTGCC               | CATCATCCTC               | CTGCTGATCC         |



TGGTGGTGTT CATCCGGCTC CTGCAGTCCC ACTGCCACG TGTC

1 1 1 1 1  
5 97

|            |            |            |            |            |            |
|------------|------------|------------|------------|------------|------------|
| ASIAN2_Ema | AAGACAGCTA | CCTGGTCAAC | CAACTGGAAG | AGATCTGTAT | TTATGCCTAT |
|            | TCCAAATAAA | GGTGATCCAA | CAGAATGCAG | AAATTATCTA | ACAATAT    |
| FOR_DS1535 | AAGACAGCTA | CCTGGTCAAC | CAACTGGAAG | AGATCTGTAT | TTATGCCTAT |
|            | TCCAAATAAA | GGTGATCCAA | CAGAATGCAG | AAATTATCTA | ACAATAT    |
| MAM1_SP134 | AAGACAGCTA | CCTGGTCAAC | CAACTGGAAG | AGATCTGTAT | TTATGCCTAT |
|            | TCCAAATAAA | GGTGATCCAA | CAGAATGCAG | AAATTATCTA | ACAATAT    |
| MAST_A421_ | AAGACAGCTA | CCTGGTCAAC | CAACTGGAAG | AGATCTGTAG | TTATACCTAT |
|            | TTCAAAGAAA | GGTGATCCAG | CAGAATGTGG | AAATTATCAA | ACAATAT    |
| SAV1_SE210 | AAGACAGCTA | CCTGGTCAAC | CAACTGGAAG | AGATCTGTAT | TTATGCCTAT |
|            | TCCAAATAAA | GGTGATCCAA | CAGAATGCAG | AAATTATCTA | ACAATAT    |

1 1 1 1 1  
5 105

|            |            |            |            |            |            |
|------------|------------|------------|------------|------------|------------|
| ASIAN2_Ema | TGTCTTTGTG | CCACTCTGAA | TCCATCTTGA | GATCCCCTCT | TCTCTCCCTT |
|            | TTAAAGAGAG | CTGGCAAAC  | CACCTCCTGG | TAACTCCCTG | CTGATTCCAA |
|            | GAATC      |            |            |            |            |
| FOR_DS1535 | TGTCTTTGTG | TCACTCTGAA | TCCATCTTGA | GATCCCCTCT | TCTCTCCCTT |
|            | TTAAAAAGAG | CTGGCAAAC  | CACCTCCTGG | TAACTCCCTG | CTGATTCCAA |
|            | GAATC      |            |            |            |            |
| MAM1_SP134 | TGTCTTTGTG | CCACTCTGAA | TCCATCTTGA | GATCCCCTCT | TCTCTCCCTT |
|            | TTAAAGAGAG | CTGGCAAAC  | CACCTCCTGG | TAACTCCCTG | CTGATTCCAA |
|            | GAATC      |            |            |            |            |
| MAST_A360_ | TGTCTTTGTG | CCACTCTGAA | TCCATCTTGA | GATCCCCTCT | TTTCTCCCTT |
|            | TTAAAGAGAG | CTGGCAAAC  | CACCTCCTGG | TAACTCCCTG | CTGATTCCAA |
|            | GAATC      |            |            |            |            |
| SAV1_SE210 | TGTCTTTGTG | CCACTCTGAA | TCCATCTTGA | GATCCCCTCT | TCTCACCTT  |
|            | TTAAAGAGAG | CTGGCAAAC  | CACCTCCTGG | TAACTCCCTG | CTGATTCCAA |
|            | GAATC      |            |            |            |            |

1 1 1 1 1  
5 93

|            |            |            |            |            |            |
|------------|------------|------------|------------|------------|------------|
| ASIAN2_Ema | TCTTGCCCAG | CCCTGCTGGG | GACCTGGCTG | GGCACAGGGT | CCCTGTCGCT |
|            | CAGACCGAGG | CTCTCAGCTG | ACTTCCTGAA | GGCCCAGAAA | CTC        |
| FOR_DS1535 | TCTTGCCCAG | CCCTGCTGGG | GACCTGGCTG | GGCACAGGGT | CCCTGTCGCT |
|            | CAGACCGAGG | CTCTCAGCTG | ACTTCCTGAA | GGCCCAGAAA | CTC        |
| MAM1_SP134 | TCTTGCCCAG | CCCTGCTGGG | GACCTGGCTG | GGCACAGGGT | CCCTGTCGCT |
|            | CAGACCGAGG | CTCTCAGCTG | ACTTCCTGAA | GGCCCAGAAA | CTC        |
| MAST_A235_ | TCTTGCCCCA | CCCTACTGGG | ACTTGTTG   | AGCACAGGGT | CCCTGTCGCT |
|            | CAGACCAAGG | CTCTCAGCTG | ACTTCCTGAA | GGCCCAGAAA | CTC        |
| SAV1_SE210 | TCTTGCCCAG | CCCTGCTGGG | GACCTGGCTG | GGCACAGGGT | CCCTGTCGCT |
|            | CAGACCGAGG | CTCTCAGCTG | ACTTCCTGAA | GGCCCAGAAA | CTC        |

1 1 1 1 1  
5 95

|            |            |            |            |            |            |
|------------|------------|------------|------------|------------|------------|
| ASIAN2_Ema | TTAGTTGTGT | GCCAATTGTA | GAACAACTT  | TGGAAGCATA | ATAGTGGTAT |
|            | TCATAAGACT | TTCTGTGCTA | TATGTGGGAC | CCTCCTGGAA | CTGTT      |
| FOR_DS1535 | TTAGTTGTGT | GCCAATTGTA | GAACAACTT  | TGGAAGCATA | ATAGTGGTAT |
|            | TCATAAGACT | TTCTGTGCTA | TATGTGGGAC | CCTCCTGGAA | CTGTT      |
| MAM1_SP134 | TTAGTTGTGT | GCCAATTGTA | GAACAACTT  | TGGAAGCATA | ATAGTGGTAT |
|            | TCATAAGACT | TTCTGTGCTA | TATGTGGGAC | CCTCCTGGAA | CTGTT      |
| MAST_A423_ | TTAGTTGTGT | GCCAATTTTA | GAACAACTT  | TGGAAGTGTG | ATAGTGGTAT |
|            | TCATAAGACT | TTCTGTGCTA | TATGTGGGAC | CCTCCTGGAA | CTGTT      |
| SAV1_SE210 | TTAGTTGTGT | GCCAATTGTA | GAACAACTT  | TGGAAGCATA | ATAGTGGTAT |
|            | TCATAAGACT | TTCTGTGCTA | TATGTGGGAC | CCTCCTGGAA | CTGTT      |

1 1 1 1 1  
5 93

|            |            |            |            |            |            |
|------------|------------|------------|------------|------------|------------|
| ASIAN2_Ema | CTGGGTACAC | TTGTGTGGAA | ATTGCTAATG | TTAAGTCTTT | AATATTCTGT |
|            | TTCATGTTTT | GTTGTTGTTG | TTAGGTGCCA | TCAAATCAAT | TCA        |
| FOR_DS1535 | CTGGGTACAC | TTGTGTGGAA | ATTGCTAATG | TTAAGTCTTT | AATATTCTGT |
|            | TTCATGTTTT | GTTGTTGTTG | TTAGGTGCCA | TCAAATCAAT | TCA        |
| MAM1_SP134 | CTGGGTACAC | TTGTGTGGAA | ATTGCTAATG | TTAAGTCTTT | AATATTCTGT |

|            |                                        |                                        |                                        |                                        |                                               |
|------------|----------------------------------------|----------------------------------------|----------------------------------------|----------------------------------------|-----------------------------------------------|
| MAST_A236_ | TTCATGTTTT<br>TTGGGTATAC<br>TTCATGTTTT | GTTGTTGTTG<br>TTGTGTGGAA<br>GTTGTTTTTG | TTAGGTGCCA<br>ATTGCTAATG<br>TTAGGTGCCA | TCAAATCAAT<br>TTAAGTCTTT<br>TCAAATCAGT | TCA<br>AATATTCTGT<br>TCA<br>AATATTCTGT<br>TCA |
| SAV1_SE210 | CTGGGTACAC<br>TTCATGTTTT               | TTGTGTGGAA<br>GTTGTTGTTG               | ATTGCTAATG<br>TTAGGTGCCA               | TTAAGTCTTT<br>TCAAATCAAT               | AATATTCTGT<br>TCA                             |

1 1 1 1 1  
5 108

|            |                                      |                          |                          |                         |                          |
|------------|--------------------------------------|--------------------------|--------------------------|-------------------------|--------------------------|
| ASIAN2_Ema | ACACACAACC<br>GGGTGCCAGT<br>TGCGGGTG | TTAATGATCA<br>GAGGGTCACT | CAGAGGACGT<br>GGGAAGAGAT | CTCACCCCTT<br>ACCCAGAAA | TCCTTCACAT<br>-GGTGTCTTT |
| FOR_DS1535 | ACACACAACC<br>GGGTGCCAGT<br>TGCGGGTG | TTAATGATCA<br>GAGGGTCACT | CAGAGGACGT<br>GGGAAGAGAT | CTCACCCCTT<br>ACCCAGAAA | TCCTTCACAT<br>-GGTGTCTTT |
| MAM1_SP134 | ACACACAACC<br>GGGTGCCAGT<br>TGCGGGTG | TTAATGATCA<br>GAGGGTCACT | CAGAGGACGT<br>GGGAAGAGAT | YTCACCCCTT<br>ACCCAGAAA | TCCTTCACAT<br>-GGTGTCTTT |
| MAST_A237_ | ACACACAACC<br>GGGTGCCAGT<br>TGCGGGTA | TTAATGATCA<br>GAGGGTCACT | CAGAGGACGT<br>GGGAAGAGAT | CTCACCCCTT<br>ATCCAGAAA | TCCTTCACAT<br>AGGTGTCTTT |
| SAV1_SE210 | ACACACAACC<br>GGGTGCCAGT<br>GGCGGGTG | TTAATGATCA<br>GAGGGTCACT | CAGAGGACGT<br>GGGAAGAGAT | CTCACCCCTT<br>ACCCAGAAA | TCCTTCACAT<br>-GGTGTCTTT |

1 1 1 1 1  
5 93

|            |                          |                          |                          |                          |                   |
|------------|--------------------------|--------------------------|--------------------------|--------------------------|-------------------|
| ASIAN2_Ema | AATTACTAAT<br>AAATATTTCC | TACAGTTAGG<br>ACATGCTTGC | AATGCTAGAA<br>AGTTTGTTTT | TTAAAAAATT<br>AATGTGGAGG | ATGCTACCAA<br>GTG |
| FOR_DS1535 | AATTACTAAT<br>AAATATTTCC | TACAGTTAGG<br>ACATGCTTGC | AATGCTAGAA<br>AGTTTGTTTT | TTAAAAAATT<br>AATGTGGAGG | ATGCTACCAA<br>GTG |
| MAM1_SP134 | AATTACTAAT<br>AAATATTTCC | TACAGTTAGG<br>ACATGCTTGC | AATGCTAGAA<br>AGTTTGTTTT | TTAAAAAATT<br>AATGTGGAGG | ATGCTACCAA<br>GTG |
| MAST_A238_ | AATTACTAAT<br>AAATATTTCC | TACAGTTAGG<br>ACATGCTTGC | AATGCTAGAA<br>AGTTTGTTTT | TTAAAAAATT<br>AATGTGGAAG | ATGCTACCAA<br>GTA |
| SAV1_SE210 | AATTACTAAT<br>AAATATTTCC | TACAGTTAGG<br>ACATGCTTGC | AATGCTAGAA<br>AGTTTGTTTT | TTAAAAAATT<br>AATGTGGAGG | ATGCTACCAA<br>GTG |

1 1 1 1 1  
5 111

|            |                                        |                               |                          |                          |                          |
|------------|----------------------------------------|-------------------------------|--------------------------|--------------------------|--------------------------|
| ASIAN2_Ema | TTGAATTGCC<br>TGCCACATCT<br>TTAGGTTATC | CCATAGGGTT<br>TTCTCCCTTG<br>A | TCCAAGGCTG<br>GAGTGGTTGG | TAATCTTTAT<br>TGGGTTTGAA | GGAAGCAGAC<br>CTGCCAECTT |
| FOR_DS1535 | TTGAATTGCC<br>TGCCACATCT<br>TTAGGTTATC | CCATAGGGTT<br>TTCTCCCTTG<br>A | TCCAAGGCTG<br>GAGTGGTTGG | TAATCTTTAT<br>TGGGTTTGAA | GGAAGCAGAC<br>CTGCCAECTT |
| MAM1_SP134 | TTGAATTGCC<br>TGCCACATCT<br>TTAGGTTATC | CCATAGGATT<br>TTCTCCCTTG<br>A | TCCAAGGCTG<br>GAGTGGTTGG | TAATCTTTAT<br>TGGGTTTGAA | GGAAGCAGAC<br>CTGCCAECTT |
| MAST_A309_ | TAGAATTGCC<br>TGCCACATCT<br>TTTGTTAGC  | CCCTAGGGTT<br>TTCTCCCTTG<br>A | TCCAAGGCTG<br>GAGTGGTTGG | TAATCTTTAT<br>TGGATTTGAA | GAAAGCAGAT<br>CTACCAACCT |
| SAV1_SE210 | TTGAATTGCC<br>TGCCACATCT<br>TTAGGTTATC | CCATAGGGTT<br>TTCTCCCTTG<br>A | TCCAAGGCTG<br>GAGTGGTTGG | TAATCTTTAT<br>TGGGTTTGAA | GGAAGCAGAC<br>CTGCCAECTT |

1 1 1 1 1  
5 104

|            |                                  |                          |                          |                          |                          |
|------------|----------------------------------|--------------------------|--------------------------|--------------------------|--------------------------|
| ASIAN2_Ema | CTACAAAGAT<br>AATTTGATGG<br>CACT | CTCTTTGTAT<br>ATGCAAGCAA | GAGACTCCAA<br>ACTGTCCCTT | CTGGCTGGAA<br>TGTGGGGAGG | GTTTTTTGGG<br>AAAGCTTCGG |
| FOR_DS1535 | CTACAAAGAT<br>AATTTGATGG<br>CACT | CTCTTTGTAT<br>ATGCAAGCAA | GAGACTCCAA<br>ACTGTCCCTT | CTGGCTGGAA<br>TGTGGGGAGG | GTTTTTTGGG<br>AAAGCTTCGG |
| MAM1_SP134 | CTACAAAGAT<br>AATTTGATGG<br>CACT | CTCTTTGTAT<br>ATGCAAGCAA | GAGACTCCAA<br>ACTGTCCCTT | CTGGCTGGAA<br>TGTGGGGAGG | GTTTTTTGGG<br>AAAGCTTCGG |
| MAST_A311_ | TTACAAAGAT                       | TTCTTTGTAT               | GAGACTCCAA               | CTGGCTGGAA               | GTTTTTTGGG               |

|            |                                  |            |                          |                          |                          |
|------------|----------------------------------|------------|--------------------------|--------------------------|--------------------------|
|            | AATTTGATGG<br>CACT               | ATGCAAGCAA | ACTGTCCCTT               | TGTGGGGAGG               | AAAGCTTCGG               |
| SAV1_SE210 | CTACAAAGAT<br>AATTTGATGG<br>CACT | CTCTTTGTAT | GAGACTCCAA<br>ACTGTCCCTT | CTGGCTGGAA<br>TGTGGGGAGG | GTTTTTTGGG<br>AAAGCTTCGG |

1 1 1 1 1  
5 102

|            |                                |                         |                          |                          |                          |
|------------|--------------------------------|-------------------------|--------------------------|--------------------------|--------------------------|
| ASIAN2_Ema | CCATTAAGAG<br>GGTGAAAGTG<br>TG | AGACTGAGAA<br>GTGTACAGA | GGAGCAGCCA<br>AGCCAAAGAA | GTTGGGCAAA<br>ATAAAGGAAA | ATGAAAACCA<br>GGTGGTCAAC |
|------------|--------------------------------|-------------------------|--------------------------|--------------------------|--------------------------|

|            |                                |                         |                          |                          |                          |
|------------|--------------------------------|-------------------------|--------------------------|--------------------------|--------------------------|
| FOR_DS1535 | CCACTACGAG<br>GGTGAAAGTG<br>TG | AGATTGAGAA<br>GTGTACAGA | GGAGCAGCCA<br>AGCCAAAGAA | GTTGGGCAAA<br>ATAAAGGAAA | ATGAAAACCA<br>GGTGGTCAAC |
|------------|--------------------------------|-------------------------|--------------------------|--------------------------|--------------------------|

|            |                                |                         |                          |                          |                          |
|------------|--------------------------------|-------------------------|--------------------------|--------------------------|--------------------------|
| MAM1_SP134 | CCATTAAGAG<br>GGTGAAAGTG<br>TG | AGACTGAGAA<br>GTGTACAGA | GGAGCAGCCA<br>AGCCAAAGAA | GTTGGGCAAA<br>ATAAAGGAAA | ATGAAAACCA<br>GGTGGTCAAC |
|------------|--------------------------------|-------------------------|--------------------------|--------------------------|--------------------------|

|            |                                |                         |                          |                          |                          |
|------------|--------------------------------|-------------------------|--------------------------|--------------------------|--------------------------|
| MAST_A239_ | CCATTAAGTG<br>GGTGAAAGTT<br>TA | AGACTGAGAA<br>GTGTACAGA | GGAGCAGCCT<br>AGCCAAAGAA | GTTGGGCAAA<br>ATAAAGGAAA | ATGAAAACCA<br>GGTGATCAAC |
|------------|--------------------------------|-------------------------|--------------------------|--------------------------|--------------------------|

|            |                                |                         |                          |                          |                          |
|------------|--------------------------------|-------------------------|--------------------------|--------------------------|--------------------------|
| SAV1_SE210 | CCATTAAGAG<br>GGTGAAAGTG<br>TG | AGACTGAGAA<br>GTGTACAGA | GGAGCAGCCA<br>AGCCAAAGAA | GTTGGGCAAA<br>ATAAAGGAAA | ATGAAAACCA<br>GGTGGTCAAC |
|------------|--------------------------------|-------------------------|--------------------------|--------------------------|--------------------------|

1 1 1 1 1  
5 113

|            |                                        |                                 |                          |                          |                           |
|------------|----------------------------------------|---------------------------------|--------------------------|--------------------------|---------------------------|
| ASIAN2_Ema | ACCGGGGCTG<br>CGGCCGAGGG<br>CTGAACAAAC | ACGAGGTCGC<br>GACCTGGGTT<br>CAG | GGGTTGACAG<br>GAGGGTCACG | GCCACTGGCT<br>TCCCGAGAAG | GAGGGGTTCGC<br>ATGTCCCAGA |
|------------|----------------------------------------|---------------------------------|--------------------------|--------------------------|---------------------------|

|            |                                        |                                 |                          |                          |                           |
|------------|----------------------------------------|---------------------------------|--------------------------|--------------------------|---------------------------|
| FOR_DS1535 | ACCGGGGCTG<br>CGGCCGAGGG<br>CTGAGCAAAC | ACGAGGTCGY<br>GACCTGGGTT<br>CAG | GGGTTGACAG<br>GAGGGTCACG | GCCACTGGCT<br>TCCCGAGAAG | GAGGGGTTCGC<br>ATGTCCCAGA |
|------------|----------------------------------------|---------------------------------|--------------------------|--------------------------|---------------------------|

|            |                                        |                                 |                          |                          |                           |
|------------|----------------------------------------|---------------------------------|--------------------------|--------------------------|---------------------------|
| MAM1_SP134 | ACCGGGGCTG<br>CGGCCGAGGG<br>CTGAGCAAAC | ACGAGGTCGC<br>GACCTGGGTT<br>CAG | GGGTTGACAG<br>GAGGGTCACG | GCCACTGGCT<br>TCCCGAGAAG | GAGGGGTTCGC<br>ATGTCCCAGA |
|------------|----------------------------------------|---------------------------------|--------------------------|--------------------------|---------------------------|

|            |                                        |                                 |                          |                          |                           |
|------------|----------------------------------------|---------------------------------|--------------------------|--------------------------|---------------------------|
| MAST_A312_ | ACCGGGGCTG<br>CGGCCGAGGG<br>CTGAGCAAAC | ACGAGGTCGC<br>GACCTGGGTT<br>CAG | GGGTTGACAG<br>GAGGGTCACG | GCCACTGGCT<br>TCCCGAGAAG | GAGGGGTTCGC<br>ATGTCCCAGA |
|------------|----------------------------------------|---------------------------------|--------------------------|--------------------------|---------------------------|

|            |                                        |                                 |                          |                          |                           |
|------------|----------------------------------------|---------------------------------|--------------------------|--------------------------|---------------------------|
| SAV1_SE210 | GCCGGGGCTG<br>CGGCCGAGGG<br>CTGAGCAAAC | ACGAGGTCGC<br>GACCTGGGTT<br>CAG | GGGTTGACAG<br>GAGGGTCACG | GCCACTGGCT<br>TCCCGAGAAG | GAGGGGTTCGC<br>ATGTCCCAGA |
|------------|----------------------------------------|---------------------------------|--------------------------|--------------------------|---------------------------|

1 1 1 1 1  
5 108

|            |                                    |                          |                          |                          |                          |
|------------|------------------------------------|--------------------------|--------------------------|--------------------------|--------------------------|
| ASIAN2_Ema | AAAAGTTCTT<br>CTATTAATAA<br>TTTGTA | CTTAACAGTC<br>AAAA-G-CAA | AGATCACACA<br>TATCTAAAAT | CTATCAGAGC<br>GCTGTGCTGG | ATTCGTATTT<br>CTAGACATAT |
|------------|------------------------------------|--------------------------|--------------------------|--------------------------|--------------------------|

|            |                                    |                          |                          |                          |                          |
|------------|------------------------------------|--------------------------|--------------------------|--------------------------|--------------------------|
| FOR_DS1535 | AAAAGTTCTT<br>CTATTAATAA<br>TTTGTA | ---AACAGTC<br>AAAAAG-CAA | AGATCACACA<br>TATCTAAAAT | CTATCAGAGC<br>GCTGTGCTGG | ATTCGTATTT<br>CTAGACATAT |
|------------|------------------------------------|--------------------------|--------------------------|--------------------------|--------------------------|

|            |                                    |                          |                          |                          |                          |
|------------|------------------------------------|--------------------------|--------------------------|--------------------------|--------------------------|
| MAM1_SP134 | AAAAGTTCTT<br>CTATTAATAA<br>TTTGTA | CTTAACAGTC<br>AAAAAG-CAA | AGATCACACA<br>TATCTAAAAT | CTATCAGAGC<br>GCTGTGCTGG | ATTCGTATTT<br>CTAGACATAT |
|------------|------------------------------------|--------------------------|--------------------------|--------------------------|--------------------------|

|            |                                    |                          |                          |                          |                          |
|------------|------------------------------------|--------------------------|--------------------------|--------------------------|--------------------------|
| MAST_A241_ | AAAAGTTCTT<br>CTATTAATAA<br>TTTGTA | CTTAACAGTC<br>AAAAAGACAA | AGATCACACA<br>CATCTAAAAT | CTATCAGAGC<br>GCTGGGCTGG | ATTCGTATTT<br>CTAGACTTAT |
|------------|------------------------------------|--------------------------|--------------------------|--------------------------|--------------------------|

|            |                                    |                          |                          |                          |                          |
|------------|------------------------------------|--------------------------|--------------------------|--------------------------|--------------------------|
| SAV1_SE210 | AAAAGTTCTT<br>CTATTAATAA<br>TTTGTA | CTTAACAGTC<br>AAA--G-CAA | AGATCACACA<br>TATCTAAAAT | CTATCAGAGC<br>GCTGTGCTGG | ATTCGTATTT<br>CTAGACATAT |
|------------|------------------------------------|--------------------------|--------------------------|--------------------------|--------------------------|

1 1 1 1 1  
5 102

|            |                                |                          |                          |                          |                           |
|------------|--------------------------------|--------------------------|--------------------------|--------------------------|---------------------------|
| ASIAN2_Ema | CCAAATA-TA<br>GCCATCAGCT<br>AA | AATGCATTTT<br>TCTCAAGGAG | CCATTGGATT<br>CTGAGGGTGA | GGCCAAGTAG<br>ATCTCATTAA | AACTGGATTA<br>CCAACCTTAGA |
|------------|--------------------------------|--------------------------|--------------------------|--------------------------|---------------------------|

|            |                          |                          |                          |                          |                           |
|------------|--------------------------|--------------------------|--------------------------|--------------------------|---------------------------|
| FOR_DS1535 | CCAAATA-TA<br>GCCATCAGCT | AATGCATTTT<br>TCTCAAGGAG | CCATTGGATT<br>CTGAGGGTGA | GGCCAAGTAG<br>ATCTCATTAA | AACTGGATTA<br>CCAACCTTAGA |
|------------|--------------------------|--------------------------|--------------------------|--------------------------|---------------------------|

|            |                                |                          |                          |                          |                           |
|------------|--------------------------------|--------------------------|--------------------------|--------------------------|---------------------------|
| MAM1_SP134 | AA<br>CCAAATAATA<br>GCCATCAGCT | AATGCATTTT<br>TCTCAAGGAG | CCATTGGATT<br>CTGAGGGTGA | GGCCAAGTAG<br>ATCTCATTAA | AACTGGATTA<br>CCAACCTTAGA |
| MAST_A313_ | AA<br>CCAAATA-TA<br>GCCATCAGCT | AATGCATTTT<br>TCTCAAGGAG | CCATTGGATT<br>CTGAGGGTGA | GGCCAAGTAG<br>ATCTCATTAA | AATTGGATTA<br>CCAACCTTAGA |
| SAV1_SE210 | AA<br>CCAAATA-TA<br>GCCATCAGCT | AATGCATTTT<br>TCTCAAGGAG | CCATTGGATT<br>CTGAGGGTGA | GGCCAAGTAG<br>ATCTCATTAA | AGCTGGATTA<br>CCAACCTTAGA |

1 1 1 1 1  
5 102

|            |                                |                          |                          |                          |                          |
|------------|--------------------------------|--------------------------|--------------------------|--------------------------|--------------------------|
| ASIAN2_Ema | GCCTGGACAC<br>TTAGAGCATA       | CTAACAGGGC<br>CTGCTCCTTC | CCTCAATGCA<br>CTTCTAACTA | AGTGCCCCAA<br>CTGCTCCAGA | CACTCTTGTC<br>CCTGCTTTCC |
| FOR_DS1535 | AG<br>GCCTGGACAC<br>TTAGAGCATA | CTAACAGGGC<br>CTGCTCCTTC | CCTCAATGCA<br>CTTCTAACTA | AGTGCCCCAA<br>GTGCTCCAGA | CACTCTTGTC<br>CCTGCTTTCC |
| MAM1_SP134 | AG<br>GCCTGGACAC<br>TTAGAGCATA | CTAACAGGGC<br>CTGCTCCTTC | CCTCAATGCA<br>CTTCTAACTA | AGTGCCCCAA<br>CTGCTCCAGA | CACTCTTGTC<br>CCTGCTTTCC |
| MAST_A314_ | AG<br>GTCTGGACAC<br>TTAGAGCATA | CTAACAGGGC<br>CTGCTCCTTC | CCTCAATGCA<br>CTTCTAACTA | AGTGCCCCAA<br>CTGCTCCAGA | CACTCTTGTC<br>CCTGCTTTCC |
| SAV1_SE210 | AG<br>GCCTGGACAC<br>TTAGAGCATA | CTAACAGGGC<br>CTGCTCCTTC | CCTCAATGCA<br>CTTCTAACTA | AGTGCCCCAA<br>CTGCTCCAGA | CACTCTTGTC<br>CCTGCTTTCC |

1 1 1 1 1  
5 107

|            |                                     |                          |                          |                          |                          |
|------------|-------------------------------------|--------------------------|--------------------------|--------------------------|--------------------------|
| ASIAN2_Ema | TGTTGACTGG<br>AGAGGGGCGG<br>GTGCTTC | TGTGTAAATT<br>CTGAATGTTC | TGGGGTCAAA<br>TCCTCTACCA | GCTGAATCAC<br>CCTCGCCCCA | CTGGGTCAAG<br>CTTTTCAGCT |
| FOR_DS1535 | TGTTGACTGG<br>AGAGGGGAGG<br>GTGCTTC | TGTGTAAATT<br>CTGAATGTTC | TGGGGTCAAA<br>TCCTCTACCA | GCTGAATCAC<br>CCTCGCCCCA | CTGGGTCAAG<br>CTTTTCAGCT |
| MAM1_SP134 | TGTTGACTGG<br>AGAGGGGCGG<br>GTGCTTC | TGTGTAAATT<br>CTGAATGTTC | TGGGGTCAAA<br>TCCTCTACCA | GCTGAATCAC<br>CCTCGCCCCA | CTGGGTCAAG<br>CTTTTCAGCT |
| MAST_A243_ | TGTTGACTGG<br>AGAGGGGAGG<br>GTGCTTC | TGTGTAAATT<br>CTGAATGTTC | TGGGGTCAAA<br>TCCTCTACCA | GCTGAATCAC<br>CCTCGCCCCA | CTGGGTCAAG<br>CTTTTCAGCT |
| SAV1_SE210 | TGTTGACTGG<br>AGAGGGGAGG<br>GTGCTTC | TGTGTAAATT<br>CTGAATGTTC | TGGGGTCAAA<br>TCCTCTACCA | GCTGAATCAC<br>CCTCGCCCCA | CTGGGTCAAG<br>CTTTTCAGCT |

1 1 1 1 1  
5 103

|            |                                 |                          |                          |                          |                          |
|------------|---------------------------------|--------------------------|--------------------------|--------------------------|--------------------------|
| ASIAN2_Ema | CAACAGAAAA<br>GGCTGTGGAT<br>AAC | TAATTATTTA<br>AGGAAACCAG | AACTGTGCAA<br>CCTTGGTAAA | AGAAGTAATT<br>GGGAGAGAAG | TGAATTTGAA<br>TCAAGAAAAG |
| FOR_DS1535 | AAC<br>CAACAGAAAA<br>GGCTGTGGAT | TAATTATTTA<br>AGGAAACCAG | AACTGTGCAA<br>CCTTGGTAAA | AGAAGTAATT<br>GGGAGAGAAG | TGAATTTGAA<br>TCAAGAAAAG |
| MAM1_SP134 | AAC<br>CAACAGAAAA<br>GGCTGTGGAT | TAATTATTTA<br>AGGAAACCAG | AACTGTGCAA<br>CCTTGGTAAA | AGAAGTAATT<br>GGGAGAGAAG | TGAATTTGAA<br>TCAAGAAAAG |
| MAST_A244_ | AAC<br>TAACAGAAAA<br>GGCTGTGGAT | TAATTATTTA<br>AGGAAACCAG | AACTGTGCAA<br>CCTTGGTAAA | AGAAGTAATT<br>GGGAGAAAAG | TGAATTTGAA<br>TCAAGAAAAG |
| SAV1_SE210 | AAC<br>CAACAGAAAA<br>GGCTGTGGAT | TAATTATTTA<br>AGGAAACCAG | AACTGTGCAA<br>CCTTGGTAAA | AGAAGTAATT<br>GGGAGAGAAG | TGAATTTGAA<br>TCAAGAAAAG |

1 1 1 1 1  
5 118

|            |                                        |                                      |                                        |                                        |                                        |
|------------|----------------------------------------|--------------------------------------|----------------------------------------|----------------------------------------|----------------------------------------|
| ASIAN2_Ema | GTGAGAAGAG<br>AGCACGGGAG<br>TGAGCTTTCT | ACCCTGGCCC<br>AGGGAGGTGA<br>TCTTCCTC | GGTGGGAGGC<br>GAGGAGAGGG<br>GAGGAGAGGG | GGAGAAGGGA<br>AGTTAGTGGA<br>AGTTAGTGGA | GGGAGAAAGG<br>CCAACCTACA<br>CCAACCTACA |
| FOR_DS1535 | GTGAGAAGAG<br>AGCATGGGAG<br>TGAGCTTTCT | ACCCTGGCCC<br>AGGGAGGTGA<br>TCTTCCTC | GGTGGGAGGC<br>GAGGAGAGGG<br>GAGGAGAGGG | GGAGAAGGGA<br>AGTTAGTGGA<br>AGTTAGTGGA | GGGAGAAAGG<br>CCAACCTACA<br>CCAACCTACA |
| MAM1_SP134 | GTGAGAAGAG<br>AGCATGGGAG<br>TGAGCTTTCT | ACCCTGGCCT<br>AGGGAGGTGA<br>TCTTCCTC | GGTGGGAGGC<br>GAGGAGAGGG<br>GAGGAGAGGG | GGAGAAGGGA<br>AGTTAGTGGA<br>AGTTAGTGGA | GGGAGAAAGG<br>CCAACCTACA<br>CCAACCTACA |
| MAST_A315_ | GTGAGAAGAG<br>AGCATGGGAG<br>TAAGCTTTCT | ACCCTGGCCC<br>AGGGAGGTGA<br>TCTTCCTC | GGTGGGAGGC<br>GAGGAGAGGG<br>GAGGAGAGGG | GGAGGAGGGA<br>AGTTAGTGGA<br>AGTTAGTGGA | GGGAGAAAGG<br>CCAACCTACA<br>CCAACCTACA |
| SAV1_SE210 | GTGAGAAGAG<br>AGCATGGGAG<br>TGAGCTTTCT | ACCCTGGCCC<br>AGGGAGGTGA<br>TCTTCCTC | GGTGGGAGGC<br>GAGGAGAGGG<br>GAGGAGAGGG | GGAGAAGGGA<br>AGTTAGTGGA<br>AGTTAGTGGA | GGGAGAAAGG<br>CCAACCTACA<br>CCAACCTACA |

1 1 1 1 1  
5 90

|            |                          |                          |                          |                          |                          |
|------------|--------------------------|--------------------------|--------------------------|--------------------------|--------------------------|
| ASIAN2_Ema | TTGGAAAACA<br>TTACCTCTTC | GAGAAGCCAG<br>TCTGCTAACA | ATTCGCTCAG<br>TCCATGTTCC | CCTCGCCCTG<br>ACACAGCAAT | CTCTGTCCTC<br>CTCTGTCCTC |
| FOR_DS1535 | TTGGAAAACA<br>TTACCTCTTC | GAGAAGCCAG<br>TCTGCTAACA | ATTCGCTCAG<br>TCCATGTTCC | CCTCGCCCTG<br>ACACAGCAAT | CTCTGTCCTC<br>CTCTGTCCTC |
| MAM1_SP134 | TTGGAAAACA<br>TTACCTCTTC | GAGAAGCCAG<br>TCTGCTAACA | ATTCGCTCAG<br>TCCATGTTCC | CCTCGCCCTG<br>ACACAGCAAT | CTCTGTCCTC<br>CTCTGTCCTC |
| MAST_A317_ | TTGGAAAACA<br>TTAC-TCTTC | GAGGAGCCAG<br>TCTGCTAACA | ATTCGCTCAG<br>TCCATGTTCC | CCTCGCCCTG<br>ACACAGCAAT | CTGTGTGCTC<br>CTGTGTGCTC |
| SAV1_SE210 | TTGGAAAACA<br>TTACCTCTTC | GAGAAGCCAG<br>TCTGCTAACA | ATTCGCTCAG<br>TCCATGTTCC | CCTCGCCCTG<br>ACACAGCAAT | CTCTGTCCTC<br>CTCTGTCCTC |

1 1 1 1 1  
5 106

|            |                                    |                          |                          |                          |                          |
|------------|------------------------------------|--------------------------|--------------------------|--------------------------|--------------------------|
| ASIAN2_Ema | TACTAGGTGC<br>GCATCCTGAA<br>TCCAAA | CAAACACCCT<br>AGGCTGGGGA | CAGAATTGGG<br>GTCTGTGGAC | GCCTGTGGAA<br>TTACACAACC | CTCAACAGAA<br>TCAGAGGGCT |
| FOR_DS1535 | TACTAGGTGC<br>GCATCCTGAA<br>TCCAAA | CAAACACCCT<br>AGGCTGGGGA | CAGAATTGGG<br>GTCTGTGGAC | GCCTGTGGAA<br>TTACACAACC | CTCAACAGAA<br>TCAGAGGGCT |
| MAM1_SP134 | TACTAGGTGC<br>GCATCCTGAA<br>TCCAAA | CAAACACCCT<br>AGGCTGGGGA | CAGAATTGGG<br>GTCTGTGGAC | GCCTGTGGAA<br>TTACACAACC | CTCAACAGAA<br>TCAGAGGGCT |
| MAST_A364_ | TACTAGGTGC<br>GCATCCTGAA<br>TCCAAA | CAAACACCCT<br>AGGCTGGGGA | TAGAACTGGG<br>GTCTGTGGAC | GGCTGTGGAA<br>TTACACAACC | CTCAACAAAA<br>TCAGAGGGTT |
| SAV1_SE210 | TACTAGGTGC<br>GCATCCTGAA<br>TCCAAA | CAAACACCCT<br>AGGCTGGGGA | CAGAATTGGG<br>GTCTGTGGAC | GCCTGTGGAA<br>TTACACAACC | CTCAACAGAA<br>TCAGAGGGCT |

1 1 1 1 1  
5 106

|            |                                    |                          |                         |                          |                          |
|------------|------------------------------------|--------------------------|-------------------------|--------------------------|--------------------------|
| ASIAN2_Ema | CAGAAGGTGA<br>GGCCCCTGCC<br>CCAGGC | CAGGGGGTTC<br>CTGGGGGGCC | AAGTCCCCT<br>GCCTCTGAGG | TCAAAGCTGC<br>TGACCAACCT | TCACGGGAGG<br>TCCTGGTTTG |
| FOR_DS1535 | CAGAAGGTGA<br>GGCCCCTGCC<br>CCAGGC | CAGTGGGTTC<br>CTGGGGGACC | AAGTCCCCT<br>GCCTCTGAGG | TCAAAGCTGC<br>TGACCAACCT | TCACGGGAGG<br>TCCTGGTTTG |
| MAM1_SP134 | CAGAAGGTGA<br>GGCCCCTGCC<br>CCAGGC | CAGGGGGTTC<br>CTGGGGGGCC | AAGTCCCCT<br>GCCTCTGAGG | TCAAAGCTGC<br>TGACCAACCT | TCACGGGAGG<br>TCCTGGTTTG |
| MAST_A245_ | CAGAAGATGA<br>GGCCCCTGCC<br>CCAGGA | CAGGAGGTTC<br>CTGGGGTACC | AAGTCCCCT<br>GCCTCTGAGA | TCAAAGCTGC<br>TGACCAACCT | TCACGGGAGG<br>TCCTGGTTTG |
| SAV1_SE210 | CAGAAGGTGA<br>GGCCCCTGCC<br>CCAGGC | CAGTGGGTTC<br>CTGGGGGACC | AAGTCCCCT<br>GCCTCTGAGG | TCAAAGCTGC<br>TGACCAACCT | TCACGGGAGG<br>TCCTGGTTTG |

1 1 1 1 1  
5 119

|            |                                        |                                       |                          |                          |                          |
|------------|----------------------------------------|---------------------------------------|--------------------------|--------------------------|--------------------------|
| ASIAN2_Ema | CATGTGTGTC<br>T-GGAAGTAG<br>AAACTTCCAA | AGAGTAAAAC<br>ATTACAARAC<br>ACTTTTGGT | TGTCATAGGG<br>GTTTCTTTCA | TTTT-CAATG<br>AAACGTCTCT | GCTAATTTTT<br>AGGTGGACTC |
| FOR_DS1535 | CATGTGTGTC<br>T-GGAAGTAG<br>AAACTTCCAA | AGAGTAAAAC<br>ATTACAAGAC<br>ACTTTTGGT | TGTCATAGGG<br>GTTTCTTTCA | TTTT-CAATG<br>AAACGTCTCT | GCTAATTTTT<br>AGGTGGACTC |
| MAM1_SP134 | CATGTGTGTC<br>T-GGAAGTAG<br>AAACTTCCAA | AGAGTAAAAC<br>ATTACAAGAC<br>ACTTTTGGT | TGTCATAGGG<br>GTTTCTTTCA | TTTT-CAATG<br>AAACGTCTCT | GCTAATTTTT<br>AGGTGGACTC |
| MAST_A246_ | CATGTGTGTC<br>TTGGAAGTAG<br>AAACTTCCAA | AGAGTAAAAC<br>ATCACAAGAC<br>ACTTTTGGT | TGTCATAGGG<br>CTTTCTTTCA | TTTTTCAACG<br>AAACGTCTCT | GCTAATTTTT<br>AGGTGGACTC |
| SAV1_SE210 | CATGTGTGTC<br>T-GGAAGTAG<br>AAACTTCCAA | AGAGTAAAAC<br>ATTACAAGAC<br>ACTTTTGGT | TGTCATAGGG<br>GTTTCTTTCA | TTTT-CAATG<br>AAACGTCTCT | GCTAATTTTT<br>AGGTGGACTC |

1 1 1 1 1  
5 93

|            |                          |                          |                          |                          |                    |
|------------|--------------------------|--------------------------|--------------------------|--------------------------|--------------------|
| ASIAN2_Ema | GTCTGGCAGA<br>AAACCGACCG | ACTGTGCATT<br>CTGTCCCCTG | CCATGCCTGG<br>AACGCGTTCC | GTGACCTGGT<br>AAAACAAGCA | TCAATGGGGG<br>TTC  |
| FOR_DS1535 | GTCTGGCAGA<br>AAACCGACCG | ACTGTGCATT<br>CTGTCCCCTG | CCATGCCTGG<br>AACGCGTTCC | GTGACCTGGT<br>AAAACAAGCA | TCAATGGGGG<br>TTC  |
| MAM1_SP134 | GTCTGGCAGA<br>AAACCGACCG | ACTGTGCATT<br>CTGTCCCCTG | CCATGCCTGG<br>AACGCGTTCC | GTGACCTGGT<br>AAAACAAGCA | TCAATGGGGG<br>TTC  |
| MAST_A247_ | -TCTGGCAGA<br>AAACCGACCG | ACTGTGCATT<br>CTGTCCCCTG | CCATGCCTGG<br>AACGCGTTCC | GTGACCTAGT<br>AAAACAAGCA | TCAATGGGGG-<br>TTC |
| SAV1_SE210 | GTCTGGCAGA<br>AAACCGACCG | ACTGTGCATT<br>CTGTCCCCTG | CCATGCCTGG<br>AACGCGTTCC | GTGACCTGGT<br>AAAACAAGCA | TCAATGGGGG<br>TTC  |

1 1 1 1 1  
5 117

|            |                                        |                                     |                          |                          |                          |
|------------|----------------------------------------|-------------------------------------|--------------------------|--------------------------|--------------------------|
| ASIAN2_Ema | AAAGAACACA<br>TT-CGTAGTA<br>GTCCTGAGAC | AAAGCTTGTT<br>CTTGGAGATG<br>ATCAGGT | GGGTGTCGTG<br>TTGGGAAAA- | AAAAGCAAGA<br>GATGCTTTCT | AGCCCATTTT<br>TTTAAAGGCC |
| FOR_DS1535 | AAAGAACACA<br>TT-CGTAGTA<br>GTCCTGAGAC | AAAGCTTGTT<br>CTTGGAGATG<br>ATCAGGT | GGGTGTCGTG<br>TTGGGAAAA- | AAAAGCAASA<br>GATGCTTTCT | AGCCCATTTT<br>TTTAAAGGCC |
| MAM1_SP134 | AAAGAACACA<br>TT-CGTAGTA<br>GTCCTGAGAC | AAAGCTTGTT<br>CTTGGAGATG<br>ATCAGGT | GGGTGTCGTG<br>TTGGGAAAA- | AAAAGCAAGA<br>GATGCTTTCT | AGCCCATTTT<br>TTTAAAGGCC |
| MAST_A366_ | AAACAACA-A<br>TTTCGTAGTA<br>GTCCTGAGAC | AAAGCTTGTT<br>CTTGGAGACG<br>ATCAGGT | GGGTGTCGTG<br>CTGGGAAAA  | AAAAGCAAGA<br>GATGCGTTGT | AGCCCATTTT<br>TTTCAAGGCC |
| SAV1_SE210 | AAAGAACACA<br>TT-CGTAGTA<br>GTCCTGAGAC | AAAGCTTGTT<br>CTTGGAGACG<br>ATCAGGT | GGGTGTCGTG<br>TTGGGAAAA- | AAAAGCAAGA<br>GATGCTTTCT | AGCCCATTTT<br>TTTAAAGGCC |

1 1 1 1 1  
5 95

|            |                          |                          |                         |                          |                     |
|------------|--------------------------|--------------------------|-------------------------|--------------------------|---------------------|
| ASIAN2_Ema | TCGCTTACAT<br>GGGAAAGAAT | CTGGGGGAGA<br>TGGGGCTGGG | AATGTTACC<br>GGTGGTAGCT | TTCACTCGAG<br>GAGCCACAGA | CCTTGCACCA<br>GTGTG |
| FOR_DS1535 | TCGCTTACAT<br>GGGAAAGAAT | CTGGGGGAGA<br>TGGAGCTGGG | AATGTTACC<br>GGTGGTAGCT | TTCACTCGAG<br>GAGCCACAGA | CCTTGCACCA<br>GTGTG |
| MAM1_SP134 | TCGCTTACAT<br>GGGAAAGAAT | CTGGGGGAGA<br>TGGGGCTGGG | AATGTTACC<br>GGTGGTAGCT | TTCACTCGAG<br>GAGCCACAGA | CCTTGCACCA<br>GTGTG |
| MAST_A320_ | TTGCTTACAT<br>GGGAAAGAAT | CTGGGGGAGA<br>TGGGGCTGGG | AATGTTACC<br>GGTGGTAGCT | TTCACTCGAG<br>GAGCCACAGA | CCTTGCACCA<br>GTATG |
| SAV1_SE210 | TCGCTTACAT<br>GGGAAAGAAT | CTGGGGGAGA<br>TGGGGCTGGG | AATGTTACC<br>GGTGGTAGCT | TTCACTCGAG<br>GAGCCACAGA | CCTTGCACCA<br>GTGTG |

1 1 1 1 1  
5 97

|            |                          |                          |                          |                         |                       |
|------------|--------------------------|--------------------------|--------------------------|-------------------------|-----------------------|
| ASIAN2_Ema | GGCCTGAAGG<br>GAGTTGGCAG | CAAGGAGGCG<br>AGGTCAAGCC | CAGCTGGGAG<br>CACTGCTGCC | CGGTACGGA<br>CGCCTCCCAG | GCTGCTCAGA<br>GAT-GGG |
| FOR_DS1535 | GGCCTGAAGG<br>GAGTTGGCAG | CAAGGAGGCG<br>AGGTCAAGCC | CAGCTGGGAG<br>CACTGCTGCC | CGGTACGGA<br>CGCCTCCCAG | GCTGCTCAGA<br>SAT-GGG |
| MAM1_SP134 | GGCCTGAAGG               | CAAGGAGGCG               | CAGCTGGGAG               | CGGTACGGA               | GCTGCTCAGA            |

|            |            |            |            |            |            |
|------------|------------|------------|------------|------------|------------|
| MAST_A321_ | GAGTTGGCAG | AGGTCAGGCC | CACTGCTGCC | CGCCTCCCAG | GAT-GGG    |
| SAV1_SE210 | GGTCTGAAGG | CAAGGAGGCC | CAGCTGGGAG | CGGTACACGA | GCTGCTCAGA |
|            | GAGTTGGCAG | AGGTCAGGCC | CACTGCTGCC | CGCCTCCCAG | GAT-GGG    |
|            | GGCCTGAAGG | CAAGGAGGCC | CAGCTGGGAG | CGGTACACGA | GCTGCTCAGA |
|            | GAGTTGGCAG | AGGTCAGGCC | CACTGCTGCC | CGCCTCCCAG | GAT-GGG    |

1 1 1 1 1  
5 107

|            |            |            |            |            |            |
|------------|------------|------------|------------|------------|------------|
| ASIAN2_Ema | AAGAGTAAAG | CTAGAGAATT | AATTCTAATA | AATACTTGTG | TCTCAAAGTA |
| FOR_DS1535 | AAA-GCCTGA | AATGGGCGTC | AGGAAACGTT | CATGTGCAAG | GTGAAGATCA |
| MAM1_SP134 | ATAACTG    |            |            |            |            |
| MAST_A249_ | AAGAGTAAAG | CTAGAGAATT | AATTCTAATA | AATACTTGTG | TCTCAAAGTA |
| SAV1_SE210 | AAA-GCCTGA | AATGGGCGTC | AGGAAACGTT | CATGTGCAAG | GTGAAGATCA |
|            | ATAACTG    |            |            |            |            |
|            | AAGAGTAAAG | CTAGAGAATT | AATTCTAATA | AATACTTGTG | TCTCAAAGTA |
|            | AAA-GCCTGA | AATGGGCGTC | AGGAAACGTT | CATGTGCAAG | GTGAAGATCA |
|            | ATAACTG    |            |            |            |            |
|            | AAGAGTAAAG | CTAGAGAATT | AATTCTAATA | AATACTTGTG | YCTCAAAGTA |
|            | AAA-GCCTGA | AATGGGCGTC | AGGAAACGTT | CATGTGCAAG | GTGAAGATCA |
|            | ATAACTG    |            |            |            |            |

1 1 1 1 1  
5 109

|            |            |            |            |            |            |
|------------|------------|------------|------------|------------|------------|
| ASIAN2_Ema | TTCACTATTC | TTTTGGTTTT | CCTTTTCTTC | TCTCCTGTGT | CTCTTCCACA |
| FOR_DS1535 | GATATTGCTG | CCTCTCTTTG | GCATCAGTTC | GGGTCTTGAA | AATGTGGCCA |
| MAM1_SP134 | CCTGTGAAT  |            |            |            |            |
| MAST_A368_ | TTCACTATTC | TTTTGGTTTT | CCTTTTCTTC | TCTCCTGTGT | CTCTTCCACA |
| SAV1_SE210 | GATATTGCTG | CCTCTCTTTG | GCATCAGTTC | GGGTCTTGAA | AATGTGGCCA |
|            | CCTGTGAAT  |            |            |            |            |
|            | TTCACTATTC | TTTTGGTTTT | CCTTTTCTTC | TCTCCTGTGT | CTCTTCCACA |
|            | GATATTGCTG | CCTCTCTTTG | GCATCAGTTC | GGGTCTTGAA | AATGTGGCCA |
|            | CCTGTGAAT  |            |            |            |            |
|            | TTCACTATTC | TTTTGGTTTT | CCTTTTCTTC | TCTCCTGTGT | CTCTTCCACA |
|            | GATATTGCTG | CCTCTCTTTG | GCATCAGTTC | GGGTCTTGAA | AATGTGGCCA |
|            | CCTGTGAAT  |            |            |            |            |

1 1 1 1 1  
5 97

|            |            |            |            |            |            |
|------------|------------|------------|------------|------------|------------|
| ASIAN2_Ema | CTCAGAGTGG | GGTGAGGAAT | TCCATTTTGA | ATGCTTCCAT | TTATCTAGCT |
| FOR_DS1535 | GTGATTTTCA | GCTCTCTGAG | TGTGAGGGGA | CCCTTGAGAC | TACCACA    |
| MAM1_SP134 | CTCAGAGTGG | GGTGAGGAAT | TCCATTTTGA | ATGCTTCCAT | TTATCTAGCT |
| MAST_A324_ | GTGATTTTCA | GCTCTCTGAG | TGTGAGGGGA | CCCTTGAGAC | TACCACA    |
| SAV1_SE210 | CTCAGAGTGG | GGTGAGGAAT | TCCATTTTGA | ATGCTTCCAT | TTATCTAGCT |
|            | GTGATTTTCA | GCTCTCTGAG | TGTGAGGGGA | CCCTTGAGAC | TACCACA    |
|            | CTCAGAGTGG | GGTGAGGAAT | TCCATTTTGA | ATGCTTCCAT | TTATCTAGCT |
|            | GTGATTTTCA | GCTCTCTGAG | TGTGAGGGGA | CCCTTGAGAC | TACCACA    |

1 1 1 1 1  
5 103

|            |            |            |            |            |             |
|------------|------------|------------|------------|------------|-------------|
| ASIAN2_Ema | TTTCAATTCT | ATTTTAAAAT | ACACATGTGG | AAGAGGCTCC | WTTACTGGGAT |
| FOR_DS1535 | TCATGGAAGT | TGCATGAGTG | CGGTGATTTG | GGAACCTAGA | GGTGATAGGT  |
| MAM1_SP134 | GCA        |            |            |            |             |
| MAST_A326_ | TTTCAATTCT | ATTTTAAAAT | ACACATGTGG | AAGAGGCTCC | TTACTGGGAT  |
|            | TCATGGAAGT | TGCATGAGTG | CGGTGATTTG | GGAACCTAGA | GGTGATAGGT  |
|            | GCA        |            |            |            |             |
|            | TTTCAATTCT | ATTTTAAAAT | ACACATGTGG | AAGAGGCTCC | TTACTGGGAT  |
|            | TCATGGAAGT | TGCATGAGTG | CGGTGATTTG | GGAACCTAGA | GGTGATAGGT  |
|            | GCA        |            |            |            |             |
|            | TTTCAATTCT | ATTTTAAAAT | ACACATGTGG | AAGAGGCTCC | TTACTGGGAT  |

|            |                                  |                           |                          |                          |                         |
|------------|----------------------------------|---------------------------|--------------------------|--------------------------|-------------------------|
|            | TCATGGAAT<br>GCA                 | TGCATGAGTG                | TGGTGATTTG               | GGAGCCTAGA               | GGTGATAGGT              |
| SAV1_SE210 | TTTTCAATTCT<br>TCATGGAAGT<br>GCA | ATTTTAAAAAT<br>TGCATGAGTG | ACACATGTGG<br>CGGTGATTTG | AAGAGGCTCC<br>GGAACCTAGA | TACTGGGAT<br>GGTGATAGGT |

1 1 1 1 1  
5 112

|            |                                        |                                |                          |                          |                         |
|------------|----------------------------------------|--------------------------------|--------------------------|--------------------------|-------------------------|
| ASIAN2_Ema | CAAATTGTGT<br>TTCAGGCCTT<br>TTAGGTGAGC | TTCATCGGGT<br>TCTTCTGAGG<br>GG | TTCCAATGAC<br>CATCTCTGGG | TGATTTTTCA<br>TGGACTCGAA | GAAGTGGGT<br>CCACCAGCCT |
| FOR_DS1535 | CAAATTGTGT<br>TTCAGGCCTT<br>TTAGGTGAGC | TTCATCGGGT<br>TCTTCTGAGG<br>GG | TTTCAATGAC<br>CATCTCTGGG | TGATTTTTCA<br>TGGACTCGAA | GAAGTGGGT<br>CCACCAGCCT |
| MAM1_SP134 | CAAATTGTGT<br>TTCAGGCCTT<br>TTAGGTGAGC | TTCATCGGGT<br>TCTTCTGAGG<br>GG | TTTCAATGAC<br>CATCTCTGGG | TGATTTTTCA<br>TGGACTCGAA | GAAGTGGGT<br>CCACCAGCCT |
| MAST_A251_ | CAAATTGTGT<br>TTCAGGCCTT<br>TTAGGTGAGT | TTCATCGGGT<br>TCTTCTGAGG<br>GG | TTTCAATGAC<br>CATCTCTGGG | TGATTTTTCA<br>TGGACTCGAA | GAAGTGGGT<br>CCACCAGCCT |
| SAV1_SE210 | CAAATTGTGT<br>TTCAGGCCTT<br>TTAGGTGAGC | TTCATCGGGT<br>TCTTCTGAGG<br>GG | TTTCAATGAC<br>CATCTCTGGG | TGATTTTTCA<br>TGKACTCGAA | GAAGTGGGT<br>CCACCAGCCT |

1 1 1 1 1  
5 105

|            |                                   |                          |                          |                          |                          |
|------------|-----------------------------------|--------------------------|--------------------------|--------------------------|--------------------------|
| ASIAN2_Ema | CCGCCAAGAC<br>TGCCCCTGCC<br>AGGCC | CTGGATT-AA<br>TCTCTGCACC | AAACTCAATC<br>CAGAGCTGGC | CCTCAGTCAC<br>GGCTGGGCAT | TATCACCAC-<br>TGGCGGCCCC |
| FOR_DS1535 | CCGCCAAGAC<br>TGCCCCTGCC<br>AGGCC | CTGGATT-AA<br>TCTCTGCACC | AAACTCAATC<br>CAGAGCTGGC | CCTCAGTCAC<br>GGCTGGGCAT | TATCACCAC-<br>TGGCGGCCCC |
| MAM1_SP134 | CCGCCAAGAC<br>TGCCCCTGCC<br>AGGCC | CTGGATT-AA<br>TCTCTGCACC | AAACTCAATC<br>CAGAGCTGGC | CCTCAGTCAC<br>AGCTGGGCAT | TAGCACCAC-<br>TGGCGGCCCC |
| MAST_A252_ | CCGCCAAGAC<br>TGCCCCTGCC<br>AGACC | CTGGATTTAA<br>TCTCTGCACC | AAACTCAATC<br>CAGAGCTGGC | CCTCAGTCAC<br>GGCTGGGCAT | TACCACCACC<br>TGGTGGCCCC |
| SAV1_SE210 | CCGCCAAGAC<br>TGCCCCTGCC<br>AGGCC | CTGGATT-AA<br>TCTCTGCACC | AAACTCAATC<br>CAGAGCTGGC | CCTCAGTCAC<br>GGCTGGGCAT | TATCACCAC-<br>TGGCGGCCCC |

1 1 1 1 1  
5 102

|            |                                |                          |                          |                          |                          |
|------------|--------------------------------|--------------------------|--------------------------|--------------------------|--------------------------|
| ASIAN2_Ema | AAAACGGAGG<br>GCCTAGTGGG<br>AA | TTCGGCAGCC<br>GTAGAATTGT | CAGGGTCAAC<br>GTAAGAGCGT | TGTCTCTAGA<br>TAGACGGGGC | GCAGGGATGG<br>CTGGGAGAGG |
| FOR_DS1535 | AAAACGGAGG<br>GCCTAGTGGG<br>AA | TTCGGCAGCC<br>GTAGAATTGT | CAGGGTCAAC<br>GTAAGAGCGT | TGTCTCTAGA<br>TAGACGGGGC | GCAGGGATGG<br>CTGGGAGAGG |
| MAM1_SP134 | AAAACGGAGG<br>GCCTAGTGGG<br>AA | TTCGGCAGCC<br>GTAGAATTGT | CAGGGTCAAC<br>GTAAGAGCGT | TGTCTCTAGA<br>TAGACGGGGC | GCAGGGATGG<br>CTGGGAGAGG |
| MAST_A328_ | AAAACGGAGG<br>GCCTAGTGGG<br>AA | TTCGGCAGCC<br>GTAGAATTGC | CAGGGTCAAC<br>ATAAGAGCAT | CGTCTCTAGA<br>TAGGCGGGGC | GCAGGGATGG<br>CTGGGAGAGG |
| SAV1_SE210 | AAAACGGAGG<br>GCCTAGTGGG<br>AA | TTCGGCAGCC<br>GTAGAATTGT | CAGGGTCAAC<br>GTAAGAGCGT | TGTCTCTAGA<br>TAGACGGGGC | GCAGGGATGG<br>CTGGGAGAGG |

1 1 1 1 1  
5 109

|            |                                      |                          |                          |                          |                          |
|------------|--------------------------------------|--------------------------|--------------------------|--------------------------|--------------------------|
| ASIAN2_Ema | TGTT-ATTT-<br>CTGCAGGAAT<br>TCCCTCTA | ATGCTGAGCA<br>GAAAGCAAGA | TTTCTGGGGG<br>ATCCTGCAGG | CCAGACAATT<br>CGGCTCCTTC | AACTTTTT-A<br>CTTGAGGGGA |
| FOR_DS1535 | TGTT-ATTT-<br>CTGCAGGAAT             | ATGCTGAGCA<br>GAAAGCAAGA | TTTCTGGGGG<br>ATCCTGCAGG | CCAGACAATT<br>CGGCTCCTTC | AACTTTTT-A<br>CTTGAGGGGA |



|            |                                                    |                          |                          |                          |                          |
|------------|----------------------------------------------------|--------------------------|--------------------------|--------------------------|--------------------------|
| MAM1_SP134 | TCCCTCCTA<br>TGTT-ATTT-<br>CTGCAGGAAT<br>TCCCTCCTA | ATGCTGAGCA<br>GAAAGCAAGA | TTTCTGGGGG<br>ATCCTGCAGG | CCAGACAATT<br>CGGCTCCTTC | AACTTTTT-A<br>CTTGAGGGGA |
| MAST_A254_ | TGTTTTATTTT<br>CTGCAGGAAT<br>TCCCTCCTA             | ATGCTGAGCA<br>GAAAGCAAGA | TTTCTGGGGG<br>ATCCTGCAGG | CCAGACAATT<br>CGGCTCCTTC | AACTTTTTTA<br>CTTAAAGTAA |
| SAV1_SE210 | TGTT-ATTT-<br>CTGCAGGAAT<br>TCCCTCCTA              | ATGCTGAGCA<br>GAAAGCAAGA | TTTCTGGGGG<br>ATCCTGCAGG | CCAGACAATT<br>CGGCTCCTTC | AACTTTTT-A<br>CTTGAGGGGA |

1 1 1 1 1  
5 91

|            |                          |                          |                          |                            |                 |
|------------|--------------------------|--------------------------|--------------------------|----------------------------|-----------------|
| ASIAN2_Ema | GAAACACACC<br>GTTCTTGTGT | AAAAGACATC<br>CTTCAGAAAA | TGAAACACAG<br>TCCAGAAGGG | ACCAAGTGGTG<br>CCCCAAAAA-  | CAAGGCCATA<br>G |
| FOR_DS1535 | GAAACACACC<br>GTTCTTGTGT | AAAAGACGTC<br>CTTCAGAAAA | TGAATCACAG<br>TCCAGAAGGG | ACCAATGGTG<br>CCCCAAAAA-   | CAAGGCCATA<br>G |
| MAM1_SP134 | GAAACACACC<br>GTTCTTGTGT | AAAAGACGTC<br>CTTCAGAAAA | TGAATCACAG<br>TCCAGAAGGG | ACCAAGTGGTG<br>CCCCAAAAA-  | CAAGGCCATA<br>G |
| MAST_A330_ | GAAATACACC<br>GTTCTTGTGT | AAAAGACGTC<br>CTTCAGAAAA | TGAATCACAG<br>TCCAGAAGGG | ACCAAGTGGTG<br>CCCCAAAAA   | CAAGGCCATA<br>G |
| SAV1_SE210 | GAAACACACC<br>GTTCTTGTGT | AAAAGACGTC<br>CTTCAGAAAA | TGAATCACAG<br>TCCAGAAGGG | ACCAAGTGGTG<br>CCCCAAAAA-- | CAAGGCCATA<br>G |

1 1 1 1 1  
5 106

|            |                                    |                          |                          |                          |                          |
|------------|------------------------------------|--------------------------|--------------------------|--------------------------|--------------------------|
| ASIAN2_Ema | ACAAAGAGGT<br>CTGGCGATTT<br>GTTGTA | GGGCAGTTTG<br>GCTCCCGTAA | AACCCATCCA<br>AGATTACAGC | GTGGGTCCAT<br>CTAGAAAACC | GGAGAAAGAC<br>CTATGGAATA |
| FOR_DS1535 | ACAAAGAGGT<br>CTGGCGATTT<br>GTTGTA | GGGCAGTTTG<br>GCTCCCGTAA | AACCCATCCA<br>AGATTACAGC | GTGGGTCCAT<br>CTAGAAAACC | GGAGAAAGAC<br>CTATGGAACA |
| MAM1_SP134 | ACAAAGAGGT<br>CTGGCGATTT<br>GTTGTA | GGGCAGTTTG<br>GCTCCCGTAA | AACCCATCCA<br>AGATTACAGC | GTGGGTCCAT<br>CTAGAAAACC | GGAGAAAGAC<br>CTATGGAACA |
| MAST_A331_ | ACAAAGAGGT<br>CTGGCGATTT<br>GTTGTA | GGGCAGTTTG<br>GCTCCCGTAA | AACCCATCCA<br>AGATTACAGC | GTGGGTCCAT<br>CTAGAAAACC | GGAGAAAGAC<br>TTATGGAACA |
| SAV1_SE210 | ACAAAGAGGT<br>CTGGCGATTT<br>GTTGTA | GGGCAGTTTG<br>GCTCCCGTAA | AACCCATCCA<br>AGATTACAGC | GTGGGTCCAT<br>CTAGAAAACC | GGAGAAAGAC<br>CTATGGAACA |

1 1 1 1 1  
5 102

|            |                                |                          |                          |                          |                          |
|------------|--------------------------------|--------------------------|--------------------------|--------------------------|--------------------------|
| ASIAN2_Ema | CTCCTGAGTC<br>CCTTGTCATT<br>AT | TCCCTTT-GC<br>CAGTCTGTGC | TCAAGACTTG<br>TGTCACTCAA | TGTCTGTCAC<br>GCCCTCCCCA | ACCAGACAGA<br>CCATAAGTAA |
| FOR_DS1535 | CTCCTGAGTC<br>CCTTGTCATT<br>AT | TCCCTTT-GC<br>CAGTCTGTGC | TCAAGACTTG<br>TGTCACTCAA | TGTCTGTCAC<br>GCCCTCCCCA | ACCAGATAGA<br>CCATAAGTAA |
| MAM1_SP134 | CTCCTGAGTC<br>CCTTGTCATT<br>AT | TCCCTTT-GC<br>CAGTCTGTGC | TCAAGACTTG<br>TGTCACTCAA | TGTCTGTCAC<br>GCCCTCCCCA | ACCAGACAGA<br>CCATAAGTAA |
| MAST_A373_ | CTCCTGAGTC<br>CCTTGTCATT<br>AT | TTCCTTTTGT<br>CAGTCTGTGC | TTAAGACTTG<br>TGTCACTCAA | TGTCTGTCAC<br>GCCCTCCCCA | ACCAGACAGA<br>CCATAAGTAA |
| SAV1_SE210 | CTCCTGAGTC<br>CCTTGTCATT<br>AT | TCTCTTT-GC<br>CAGTCTGTGC | TCAAGACTTG<br>TGTCACTCAA | TGTCTGTCAC<br>GCCCTCCCCA | ACCAGATAGA<br>CCATAAGTAA |

1 1 1 1 1  
5 103

|            |                                 |                          |                          |                          |                          |
|------------|---------------------------------|--------------------------|--------------------------|--------------------------|--------------------------|
| ASIAN2_Ema | TCCAAGTCAT<br>TCCAAATCCT<br>GTG | CAGTGAGTGC<br>CTTTGAGGCC | CACAGGCGTC<br>TCCATTTCTC | ACCCCTAAAC<br>CGCCATAAAA | TACTGCATAT<br>TGCTGGGTCT |
| FOR_DS1535 | TCCAAGTCAT<br>TCCAAATCCT        | CAGTGAGTGC<br>CTTTGAGGCC | CACGGGCGTC<br>TCCATTTCTC | ACCCCTAAAC<br>CGCCATAAAA | TACTGCATAT<br>TGCTGGGTCT |

|            |                                 |                          |                          |                          |                          |
|------------|---------------------------------|--------------------------|--------------------------|--------------------------|--------------------------|
| MAM1_SP134 | GTG<br>TCCAAGTCAT<br>TCCAATCCT  | CAGTGAGTGC<br>CTTTGAGGCC | CACAGGCGTC<br>TCCATTTCTC | ACCCCTAAAC<br>CGCCATAAAA | TACTGCATAT<br>TGCTGGGTCT |
| MAST_A255_ | GTG<br>TCCAAGTCAT<br>TCTAAATCCT | CAGTGAGTGC<br>CTTTGAGGCC | CACGGGCGTC<br>TCCATTTCTC | ACCCCTAAAC<br>CGCCATAAAA | TACTGCATAT<br>TGCTGGGTCT |
| SAV1_SE210 | GTA<br>TCCAAGTCAT<br>TCCAATCCT  | CAGTGAGTGC<br>CTTTGAGGCC | CACGGGCGTC<br>TCCATTTCTC | ACCCCTAAAC<br>CGCCATAAAA | TACTGCATAT<br>TGCTGGGTCT |

1 1 1 1 1  
5 90

|            |                          |                          |                          |                          |            |
|------------|--------------------------|--------------------------|--------------------------|--------------------------|------------|
| ASIAN2_Ema | AAATCTGAGC<br>CTTTGTTTTC | TGGCAAAACT<br>CATTAGTGTG | CTTCCTGGCT<br>TGTTGTCGTC | TGCCCTGATG<br>ACAGTAACTG | AGCAGACCAT |
| FOR_DS1535 | AAATCTGAGC<br>CTTTGTTTTC | TGGCAAAACT<br>CATTAGTGTG | CTTCCTGGCT<br>TGTTGTCGTC | TGCCCTGATG<br>ACAGTAACTG | AGCAGACCAT |
| MAM1_SP134 | AAATCTGAGC<br>CTTTGTTTTC | TGGCAAAACT<br>CATTAGTGTG | CTTCCTGGCT<br>TGTTGTCGTC | TGCCCTGATG<br>ACAGTAACTG | AGCAGACCAT |
| MAST_A332_ | AAATTTGAGC<br>CTTTGTTTTC | TGGCAAAACT<br>CATTAGTGTG | CTTCCTGGCT<br>TGTTGTCGTC | TGCCCTGATG<br>ACAGTAACTG | AGCAGACCAT |
| SAV1_SE210 | AAATCTGAGC<br>CTTTGTTTTC | TGGCAAAACT<br>CATTAGTGTG | CTTCCTGGCT<br>TGTTGTCGTC | TGCCCTGATG<br>ACAGTAACTG | AGCAGACCAT |

1 1 1 1 1  
5 103

|            |                                 |                           |                          |                          |                          |
|------------|---------------------------------|---------------------------|--------------------------|--------------------------|--------------------------|
| ASIAN2_Ema | AGCTCCCCTC<br>TGTCACAGGG<br>CTT | CTGCTATAACC<br>AGGTTCTCAC | CCACAGAGTT<br>TCAAAAGCCC | GCTGAGGAAT<br>TTTCTGGGAA | CCCTCCTCCC<br>TGCCACAGCC |
| FOR_DS1535 | AGCTCCCCTC<br>TGTCACAGGG<br>CTT | CTGCTATAACC<br>AGGTTCTCAC | CCACAGAGTT<br>TCAAAAGCCC | GCTGAGGAAT<br>TTTCTGGGAA | CCCTCCTCCC<br>TGCCACAGCC |
| MAM1_SP134 | AGCTCCCCTC<br>TGTCACAGGG<br>CTT | CTGCTATAACC<br>AGGTTCTCAC | CCACAGAGTT<br>TCAAAAGCCC | GCTGAGGAAT<br>TTTCTGGGAA | CCCTCCTCCC<br>TGCCACAGCC |
| MAST_A257_ | AGCTCCCCTC<br>TGTCACAGGG<br>CTT | CTGCTATATC<br>AGGTTCTCAC  | CCACAGAGTT<br>TCAAAAGCCC | GCTGAGGAAT<br>TTTCTGGGAA | CCCTCCTCCC<br>TGCCACAGCC |
| SAV1_SE210 | AGCTCCCCTC<br>TGTCACAGGG<br>CTT | CTGCTATAACC<br>AGGTTCTCAC | CCACAGAGTT<br>TCAAAAGTCC | GCTGAGGAAT<br>TTTCTGGGAA | CCCTCCTCCC<br>TGCCACAGCC |

1 1 1 1 1  
5 101

|            |                               |                          |                          |                         |                          |
|------------|-------------------------------|--------------------------|--------------------------|-------------------------|--------------------------|
| ASIAN2_Ema | ATTTTAACTC<br>TGAGGAATTT<br>A | TATCTGGTGC<br>GGGAAGGGTG | TATGAAAACA<br>AGTGAGAAGG | GGCAGAAAGC<br>GGTTTGAAC | TATTAGGACA<br>ACAATCTGAA |
| FOR_DS1535 | ATTTTAACTC<br>TGAGGAATTT<br>A | TATCTGGTGC<br>GGGAAGGGTG | TATGAAAACA<br>AGTGAGAAGG | GGCAGAAAGC<br>GGTTTGAAC | TATTAGGACA<br>ACAATCTGAA |
| MAM1_SP134 | ATTTCAACTC<br>TGAGGAATTT<br>A | TATCTGGTGC<br>GGGAAGGGTG | TATGAAAACA<br>AGTGAGAAGG | GGCAGAAAGC<br>GGTTTGAAC | TATTAGGACA<br>ACAATCTGAA |
| MAST_A333_ | ATTTTAACTC<br>TGAGGAATTT<br>A | TATCTGGTGC<br>GGGAAGGGTG | TATGAAAACA<br>AATGAGAAGG | GGCAGAAAGC<br>GGTTTGAAC | TATTAGGACA<br>ACAGTCTGAA |
| SAV1_SE210 | ATTTTAACTC<br>TGAGGAATTC<br>A | TATCTGGTGC<br>GGGAAGGGTG | TATGAAAACA<br>AGTGAGAAGG | GGCAGAAAGC<br>GGTTTGAAC | TATTAGGACA<br>ACAATCTGAA |

1 1 1 1 1  
5 116

|            |                                        |                                    |                          |                          |                          |
|------------|----------------------------------------|------------------------------------|--------------------------|--------------------------|--------------------------|
| ASIAN2_Ema | CAGAGGCTTT<br>GGGCTCCAGA<br>GTGTTGGGAC | GGGGTCTCTG<br>GACACCCTGG<br>CACATT | GCCAGATGGA<br>GCTGATTTAC | CCAGTCTCTT<br>AGCCGCCTGG | TTTAAGTCCA<br>CCATAAAGGG |
| FOR_DS1535 | CAGAGGCTTT<br>GGGCTCCAGA               | GGGGTCTCTG<br>GACGCCCTGG           | GCCAGACGGA<br>GCTGATTTAC | CCAGTCTCTT<br>AGCTGCCCGG | TTTAAGTCCA<br>CCATAAAGGG |

|            |                                                      |                                             |                          |                          |                          |
|------------|------------------------------------------------------|---------------------------------------------|--------------------------|--------------------------|--------------------------|
| MAM1_SP134 | GTGTTGGGAC<br>CAGAGGCTTT<br>GGGCTCCAGA<br>GTGTTGGGAC | CACATT<br>GGGGTCTGG<br>GACGCCCTGG<br>CACATT | GCCAGATGGA<br>GCTGATTTAC | CCAGTCTCTT<br>AGCCGCCCGG | TTTAAGTCCA<br>CCATAAAGGG |
| MAST_A258_ | GTGTTGGGAC<br>CAGAGGCTTT<br>GGGTTCCAGA<br>GTGTTGGGAC | GGGGTCTGG<br>GACGCCCTGG<br>CACATT           | GCCAGATGGA<br>GCTGATTTAC | CCAGTCTCTT<br>AGCCGCCCGG | TTTAAGTCTA<br>CCATAAAGGG |
| SAV1_SE210 | GTGTTGGGAC<br>CAGAGGCTTT<br>GGGCTCCAGA<br>GTGTTGGGAC | GGGGTCTGG<br>GACGCCCTGG<br>CACATT           | GCCAGACGGA<br>GCTGATTTAC | CCAGTCTCTT<br>AGCTGCCCGG | TTTAAGTCCA<br>CCATAAAGGG |

1 1 1 1 1  
5 110

|            |                                        |                          |                          |                          |                          |
|------------|----------------------------------------|--------------------------|--------------------------|--------------------------|--------------------------|
| ASIAN2_Ema | TTGAATATTT<br>CCCTGTCTGT<br>TGCCACTGGG | GAGAATTTTT<br>GTCTGATCCC | -CAGAAATAT<br>AGCGGTACCA | TTCATGGTCC<br>CACCTATCTT | TGTATTGTGG<br>AAAA-TGGAT |
| FOR_DS1535 | TTGAATATTT<br>CCCTGTCTGT<br>TGCCACTGGG | GAGAATTTTT<br>GTCTGATCCC | -CAGAAATAT<br>AGCGGTACCA | TTCATGGTCC<br>CACCTATCTT | TGTATTCTGG<br>AAAA-TGGAT |
| MAM1_SP134 | TTGAATATTT<br>CCCTGTCTGT<br>TGCCACTGGG | GAGAATTTTT<br>GTCTGATCCC | -CAGAAATAT<br>AGCGGTACCA | TTCATGGTCC<br>CACCTATCTT | TGTATTCTGG<br>AAAA-TGGAT |
| MAST_A259_ | TTGAATATTT<br>CCCTGTCTGT<br>TGCCACTGGG | GAGAATTTTT<br>GTCTGATCCC | TCAGAAATAT<br>AGCGGTACCA | TTCATGGTCC<br>CACTTATCTT | TGTATTCTGG<br>AAAAATGGAT |
| SAV1_SE210 | TTGAATATTT<br>CCCTGTCTGT<br>TGCCACTGGG | GAGAATTTTT<br>GTCTGATCCC | -CAGAAATAT<br>AGCGGTACCA | TTCATGGTCC<br>TACCTATCTT | TGTATTCTGG<br>AAAA-TGGAT |

1 1 1 1 1  
5 108

|            |                                    |                          |                          |                          |                          |
|------------|------------------------------------|--------------------------|--------------------------|--------------------------|--------------------------|
| ASIAN2_Ema | CATCATTA<br>AACTGGTCTT<br>A-GCA-CG | TTAG-AAACA<br>GACCTGGGAT | AA-TGATGTA<br>GACATCTCAT | TTTGCAGAAA<br>ATCCGGAATG | TTGGTTTCTT<br>TTTTCACCCA |
| FOR_DS1535 | CATCATTA<br>AACTGGTCTT<br>A-GCA-CG | TTAG-AAACA<br>GACCTGGGAT | AA-TGATGTA<br>GACATCTCAT | TTTGCAGAAA<br>ATCCAGAATG | TTGGTTTCTT<br>TTTTCACCCA |
| MAM1_SP134 | CATCATTA<br>AACTGGTCTT<br>A-GCA-CG | TTAG-AAACA<br>GACCTGGGAT | AA-TGATGTA<br>GACATCTCAT | TTTGCAGAAA<br>ATCCGGAATG | TTGGTTTCTT<br>TTTTCACCCA |
| MAST_A334_ | CATCATTA<br>AACTGGTCTT<br>AAGCAACG | TTAAGAAACA<br>GACCTGGGAT | AAATGATGTA<br>GACATCTCAT | TTTGCAGAAA<br>ATCCGGAATG | TTGGTTTCTT<br>TTTTCACCCA |
| SAV1_SE210 | CATCATTA<br>AACTGGTCTT<br>A-GCA-CG | TTAG-AAACA<br>GACCTGGGAT | AA-TGATGTA<br>GACATCTCAT | TTTGCAGAAA<br>ATCCAGAATG | TTGGTTTCTT<br>TTTTCACCCA |

1 1 1 1 1  
5 115

|            |                                        |                                   |                          |                           |                          |
|------------|----------------------------------------|-----------------------------------|--------------------------|---------------------------|--------------------------|
| ASIAN2_Ema | CAGAAAATCA<br>GCTTTGGAGG<br>AATTTT-CAT | CTAAACAATA<br>GATTCCAGCA<br>GGGTG | TTATTGATGC<br>GCTGGAAAAT | CATTTTTCTT<br>CAGTGTCTGTT | TCTAAGATCA<br>CCCACAAAAA |
| FOR_DS1535 | CAGAAAATCA<br>GCTTTGGAGG<br>AATTTT-CAT | CTAAACAATA<br>GATTCCAGCA<br>GGGTG | TTATTGATGC<br>GCTGGAAAAT | CATTTTTCTT<br>CAGTGTCTGTT | TCTAAGATCA<br>CCCACAAAAA |
| MAM1_SP134 | CAGAAAATCA<br>GCTTTGGAGG<br>AATTTT-CAT | CTAAACAATA<br>GATTCCAGCA<br>GGGTG | TTATTGATGC<br>GCTGGAAAAT | CATTTTTCTT<br>CAGTGTCTGTT | TCTAAGATCA<br>CCCACAAAAA |
| MAST_A262_ | TAGAAAATCA<br>GCTTTGGAGG<br>AATTTTACAC | CTAAACAATA<br>GATTCCAGCA<br>GGGTG | TTATTGATGC<br>GCTGGAAAAT | CATTTTTCTT<br>CAGTGTCTGTT | TCTAAGATCA<br>CCCACAAAAA |
| SAV1_SE210 | CAGAAAATCA<br>GCTTTGGAGG<br>A-TTTT-CAT | TTAAACAATA<br>GATTCCAGCA<br>GGGTG | TTATTGATGC<br>GCTGGAAAAT | CATTTTTCTT<br>CAGTGTCTGTT | TCTAAGATCA<br>CCCACAAAAA |

1 1 1 1 1  
5 92

|            |            |            |            |            |            |
|------------|------------|------------|------------|------------|------------|
| ASIAN2_Ema | TCGATCACAG | ATGAACTTAG | CACCCACGGA | ATGGTTGATG | CCAGTAACTC |
| FOR_DS1535 | TGTGTGTCTC | ATTCCCAGCA | GTCTAGTGGC | TGCCTGAAAG | TT         |
| MAM1_SP134 | TCGATCACAG | ATGAACTTAG | CACCCACGGA | ATGGTTGATG | CCAGTAACTC |
| MAST_A335_ | TGTGTGTCTC | ATTCCCAGCA | GTCTAGTGGC | TGCCTGAAAG | TT         |
| SAV1_SE210 | TCGATCACAG | ATGAACTTAG | CACCCACGGA | ATGGTTGATG | CCAGTAACTC |
|            | TGTGTGTCTC | ATTCCCAGCA | GTCTAGTGGC | TGCCTGAAAG | TT         |

1 1 1 1 1  
5 96

|            |            |             |             |            |            |
|------------|------------|-------------|-------------|------------|------------|
| ASIAN2_Ema | AGAGAGAGAA | ATTGGAAGCTG | GGGCCACAGGA | ATTAGAATTT | GGGATTTAAC |
| FOR_DS1535 | ATATAAAATG | TGCCTTAATA  | CGTTTGCATC  | CTGTAGACCA | AACCAG     |
| MAM1_SP134 | AGAGAGAGAA | ATTGGAAGCTG | GGGCCACAGGA | ATTAGAATTT | GGGATTTAAC |
| MAST_A264_ | ATATAAAATG | TGCCTTAATA  | CGTTTGCATC  | CTGTAGACCA | AACCAG     |
| SAV1_SE210 | AGAGAGAGAA | ATTGGAAGCTG | GGGCCACAGGA | ATTAGAATTT | GGGATTTAAC |
|            | ATATAAAATG | TGCCTTAATA  | CGTTTGCATC  | CTGTAGACCA | AACCAG     |

1 1 1 1 1  
5 97

|            |            |            |            |            |            |
|------------|------------|------------|------------|------------|------------|
| ASIAN2_Ema | TTTTAAATCA | GGAAAGATGT | GTGTCACGGT | TGTATTCTTT | CACTATACTT |
| FOR_DS1535 | ATTCAATCTG | TATGCTGAAC | AAATAATCCA | AGAATTGGCA | TCAGGAT    |
| MAM1_SP134 | TTTTAAATCA | GGAAAGATGT | GTGTCACGGT | TGTATTCTTT | CACTATACTT |
| MAST_A431_ | ATTCAATCTG | TATGCTGAAC | AAATAATCCA | AGAATTGGCA | TCAGGAT    |
| SAV1_SE210 | TTTTAAATCA | GGAAAGATGT | GTGTCACGGT | TGTATTCTTT | CACTATACTT |
|            | ATTCAATCTG | TATGCTGAAC | AAATAATCCA | AGAATTGGCA | TCAGGAT    |

1 1 1 1 1  
5 90

|            |            |            |            |            |            |
|------------|------------|------------|------------|------------|------------|
| ASIAN2_Ema | ACCTGATGGA | GAGGTCTTGC | TTCATCCACC | TCCAGGGACC | TCCCTCACCA |
| FOR_DS1535 | TCAATCCTGG | TGGCCTCTGG | CCAGGGTGAG | ACAAACAGGG | TCCCTCACCA |
| MAM1_SP134 | ACCTGATGGA | GAGGTCTTGC | TTCATCCACC | TCCAGGGACC | TCCCTCACCA |
| MAST_A432_ | TCAATCCTGG | TGGCCTCTGG | CCAGGGTGAG | ACAAACAGGG | TCCCTCACCA |
| SAV1_SE210 | ACCTGATGGA | GAGGTCTTGC | TTCATCCACC | TCCAGGGACC | TCCCTCACCA |
|            | TCAATCCTGG | TGGCCTCTGG | CCAGGGTGAG | ACAAACAGGG | TCCCTCACCA |

1 1 1 1 1  
5 94

|            |            |            |            |            |            |
|------------|------------|------------|------------|------------|------------|
| ASIAN2_Ema | CTTTTATAAG | TCACAGGACT | AGGGTCAGGG | AGGAGCAAGT | TTCCAGAAGC |
| FOR_DS1535 | CATGGCAGTG | GAGCCATAAA | TCAGCCAGGC | TCTCCCCAGC | GGCA       |
| MAM1_SP134 | CTTTTATAAG | TCACAGGACT | AGGGTCAGGG | AGGAGCAAGT | TTCCAGAAGC |
| MAST_A337_ | CATGGCAGTG | GAGCCATAAA | TCAGCCAGGC | TCTCCCCAGC | GGCA       |
| SAV1_SE210 | CTTTTATAAG | TCACAGGACT | AGGGTCAGGG | AGGAGCAAGT | TTCCAGAAGC |
|            | CATGGCAGTG | GAGCCATAAA | TCAGCCAGGC | TCTCCCCAGC | GGCA       |

1 1 1 1 1  
5 103

|            |            |            |            |            |            |
|------------|------------|------------|------------|------------|------------|
| ASIAN2_Ema | CACAGTCTCC | TCGTGGCTGG | AAAAGAGTGA | GATCACCACG | GTTGGGCTTC |
|------------|------------|------------|------------|------------|------------|

|            |                   |            |            |            |            |
|------------|-------------------|------------|------------|------------|------------|
|            | TTGCCTTTCC        | CCTATTGGCT | AAGCAGGATT | CTTTTACATT | CCAAAATAAG |
| FOR_DS1535 | AAT<br>CACAGTCTCC | TCGTGGCTGG | AAAAGAGTGA | GATCACCACG | GTTGGGCTTC |
|            | TTGCCTTTCC        | CCTATTGGCT | AAGCAGGATT | CTTTTACATT | CCAAAATAAG |
| MAM1_SP134 | AAT<br>CACAGTCTCC | TCGTGGCTGG | AAAAGAGTGA | GATCACCACG | GTTGGGCTTC |
|            | TTGCCTTTCC        | CCTATTGGCT | AAGCAGGATT | CTTTTACATT | CCAAAATAAG |
| MAST_A338_ | AAT<br>TACAGTCTCC | TCGTGGCTGG | AAAAGAGTGA | GATCACCAGA | GTTGGGCTTC |
|            | TTGCCTTTCC        | CCTATTGGCT | AAGCAGGATT | CTTTTACGTT | CCAAAATAAG |
| SAV1_SE210 | AAT<br>CACAGTCTCC | TCGTGGCTGG | AAAAGAGTGA | GATCACCACG | GTTGGGCTTC |
|            | TTGCCTTTCC        | CCTATTGGCT | AAGCAGGATT | CTTTTACATT | CCAAAATAAG |
|            | AAT               |            |            |            |            |

1 1 1 1 1  
5 101

|            |                 |            |            |            |            |
|------------|-----------------|------------|------------|------------|------------|
| ASIAN2_Ema | CCTGTGGCAA      | CTTGGAGGAA | CCTCAGGTTA | GCTGCATTCC | TCAAGTATAG |
|            | AAGTCTTGAG      | ATAGCCCAGA | GCATCAGACT | ATTAAAGCTC | TTTCAATAGG |
| FOR_DS1535 | G<br>CCTGTGGCAA | CTTGGAGGAA | CCTCAGGTTA | GCTGCATTCC | TCAAGTATAG |
|            | AAGTCTTGAG      | ATAGCCCAGA | GCATCAGACT | ATTAAAGCTC | TTTCAATAGG |
| MAM1_SP134 | G<br>CCTGTGGCAA | CTTGGAGGAA | CATCAGGTTA | GCTGCATTCC | TCAAGTATAG |
|            | AAGTCTTGAG      | ACAGCCCAGA | GCATCAGACT | ATTAAAGCTC | TTTCAATAGG |
| MAST_A339_ | G<br>CCTGTGGCAA | CTTGGAGGAA | CCTCAGGTTA | GCTGCATTCC | TCAAGTATAG |
|            | AAGTCTTGAG      | ATAGCCCAGA | GCATCAGACT | ATTAAAGCTC | TTTCAATAAA |
| SAV1_SE210 | A<br>CCTGTGGCAA | CTTGGAGGAA | CCTCAGGTTA | GCTGCATTCC | TCAAGTATAG |
|            | AAGTCTTGAG      | ATAGCCCAGA | GCATCAGACT | ATTAAAGCTC | TTTCAATAGG |
|            | G               |            |            |            |            |

1 1 1 1 1  
5 95

|            |            |            |            |            |            |
|------------|------------|------------|------------|------------|------------|
| ASIAN2_Ema | GTTCCAGCAT | GCCCCCA-TA | CTGCTGCTGT | ACTTTTCTGC | TTCTCTCATG |
|            | GACTAATAAT | CTTGAGAGAG | GGATTAGATG | GCTAGTCAGT | GGAGA      |
| FOR_DS1535 | GTTCCAGCAT | GCCCCCA-TA | CTGCTGCTCT | ACTTTTCTGC | TTCTCTCATG |
|            | GACTAATAAT | CTTGAGAGAG | GGATTAGATG | GCTAGTCAGT | GGAGA      |
| MAM1_SP134 | GTTCCAGCAT | GCCCCCA-TA | CTGCTGCTGT | ACTTTTCTGC | TTCTCTCATG |
|            | GACTAATAAT | CTTGAGAGAG | GGATTAGATG | GCTAGTCAGT | GGAGA      |
| MAST_A266_ | GTTCCAGCAT | GCCCCCACTA | CTGCTGCTCT | ACTTTTCTGC | TTCTCTCATG |
|            | GATTAATAAT | CTTGAGAGAG | GGATTAGATG | TCTAGTCAGT | GGAGG      |
| SAV1_SE210 | GTTCCAGCAT | GCCCCCA-TA | CTGCTGCTCT | ACTTTTCTGC | TTCTCTCATG |
|            | GACTAATAAT | CTTGAGAGAG | GGATTAGATG | GCTAGTCAGT | GGAGA      |

1 1 1 1 1  
5 93

|            |            |            |             |            |            |
|------------|------------|------------|-------------|------------|------------|
| ASIAN2_Ema | CTGCAGACAC | TCAATGTGTT | ACTTTTCTATG | GCGAGGACAG | CCTAGCCCAG |
|            | TTTATGTTCA | ACCACACCTG | TCATAATTGC  | ATAATCACGG | CAT        |
| FOR_DS1535 | CTGCAGACAC | TCAATGTGTT | ACTTTTCTATG | GCGAGGACAG | CCTAGCCCAG |
|            | TTTATGTTCA | ACCACACCTG | TCATAATTGC  | ATAATCACGG | CAT        |
| MAM1_SP134 | CTGCAGACAC | TCAATGTGTT | ACTTTTCTATG | GCGAGGACAG | CCTAGCCCAG |
|            | TTTATGTTCA | ACCACACCTG | TCATAATTGC  | ATAATCACGG | CAT        |
| MAST_A267_ | CTGCAGACAC | TCAATGTGTT | ACTTTTCTATG | GCGAGGACAG | CCTAGCCCAG |
|            | TTTATGTTCA | ACCACGCCTG | TCATAATTGC  | ATAATCACGG | GCA        |
| SAV1_SE210 | CTGCAGACAC | TCAACGTGTT | ACTTTTCTATG | GCGAGGACAG | CCTGGCCCAG |
|            | TTTATGTTCA | ACCACACCTG | TCATAATTGC  | ATAATCACGG | CAT        |

1 1 1 1 1  
5 95

|            |            |            |            |            |            |
|------------|------------|------------|------------|------------|------------|
| ASIAN2_Ema | TTGATGTTCT | CATCAAAGGG | GAAATGCCTG | AGAACCAAAA | TCAGACTCAC |
|            | TTCTTCTATT | CTGTATGCC  | AGGCTCTTAT | TCTGAGTCAG | TGGCC      |
| FOR_DS1535 | TTGAKGTTCT | CATCAAAGGG | GAAATRCCTG | AGAACCAAAA | TCAGACTCAC |
|            | TTCTTCTATT | CTGTATGCC  | AGGCTCTTAT | TCKGAGTCAG | TGGCC      |
| MAM1_SP134 | TTGATGTTCT | CATCAAAGGG | GAAATGCCTG | AGAACCAAAA | TCAGACTCAC |
|            | TTCTTCTGTT | CTGTATGCC  | AGGCTCTTAT | TCTGAGTCAG | TGGCC      |

|            |            |            |            |            |            |
|------------|------------|------------|------------|------------|------------|
| MAST_A268_ | TTGATGTTCT | CATCAAAGGG | GAAATGCCTG | AGAACCAAAA | TCAGACTCAC |
| SAV1_SE210 | TTCTTCTATT | CTGTATGCC  | AGGCTCTTAT | TCTGAGTCAG | TGGCC      |
|            | TTGAGGTTCT | CATCAAAGGG | GAAATGCCTG | AGAACCAAAA | TCAGACTCAC |
|            | TTCTTCTGTT | CTGTATGCC  | AGGCTCTTAT | TCGGAGTCAG | TGGCC      |

1 1 1 1 1  
5 92

|            |            |            |            |            |            |
|------------|------------|------------|------------|------------|------------|
| ASIAN2_Ema | GCAAAATTGA | TTTTT-CTAA | GTGCAGAGGC | CAGTCTTATG | ACAATGCTGC |
| FOR_DS1535 | CAATATGTCA | GGGTGTTATA | AGGGCGTGCA | ACAGAAAATT | TT         |
|            | GCAAAATTGA | TTTTT-CTAA | GTGCAGAGGC | CAGTCTTATG | ACAATGCTGC |
|            | CAATATGTCA | GGGTGTTATA | RAGGCACGCA | ACAGAAAATT | TT         |
| MAM1_SP134 | GCAAAATTGA | TTTTT-CTAA | GTGCAGAGGC | CAGTCTTATG | ACAATGCTGC |
|            | CAATATGTCA | GGGTGTTATA | AGGGCGTGCA | ACAGAAAATT | TT         |
| MAST_A435_ | GAAAAATTGA | TTTTTTCTAA | -TGCAGAGGC | CAGTCCTATG | ACAATGCTGT |
|            | CAATATGTCA | GAGTGTAATA | AAAGCATGCA | ACAGAAAATT | TT         |
| SAV1_SE210 | GCAAAATTGA | TTTTT-CTAA | GTGCAGAGGC | CAGTCTTATG | ACAATGCTGC |
|            | CAATATGTCA | GGGTGTTATA | AAGGCATGCA | ACAGAAAATT | TT         |

1 1 1 1 1  
5 105

|            |            |            |            |             |             |
|------------|------------|------------|------------|-------------|-------------|
| ASIAN2_Ema | CTTGAAACT  | CTATAGAGCC | ATTCTAGTCT | GCCCTGTAGG  | GTTGTTATGA  |
|            | GTCAGAATTG | ACTCGATGGC | AGTGGGTTT- | GGTTTTTT--  | GTTTTTTTTT  |
|            | --AGG      |            |            |             |             |
| FOR_DS1535 | CTTGAAACC  | CTATAGAGCC | ATTCTAGTCT | GCCCTGTAGG  | GTTGTTATGA  |
|            | GTCAGAATTG | ACTCGATGGC | AGTGGGTTT- | GGTTTTTT--  | GTTTTTTTTT  |
|            | --AGG      |            |            |             |             |
| MAM1_SP134 | CTTGAAACT  | CTATAGAGCC | ATTCTAGTCT | GCCCTGTAGG  | GTTGTTATGA  |
|            | GTCAGAATTG | ACTCGATGGC | AGTGGGTTT- | GGTTTTTTT-  | GTTTTTTTTT- |
|            | --AGG      |            |            |             |             |
| MAST_A342_ | CTTGAAACT  | CTATAGAGCC | ATTCTAGTCT | GCCCTGTAGG  | GTTGTTATGA  |
|            | GTCGGAATTG | ACTCGATGGC | AGTGGGTTTT | GGTTTTTTTT  | ATTTTTTTTT  |
|            | TTAGG      |            |            |             |             |
| SAV1_SE210 | CTTGAAACT  | CTATAGAGCC | ATTCTAGTCT | GCCCTGTAGG  | GTTGTTATGA  |
|            | GTCAGAATTG | ACTCGATGGC | AGTGGGTTT- | GGTTTTTTTT- | GTTTTTTTTT  |
|            | --AGG      |            |            |             |             |

1 1 1 1 1  
5 106

|            |            |            |            |            |            |
|------------|------------|------------|------------|------------|------------|
| ASIAN2_Ema | GAGCAATGGT | TCTTCTCTTG | AGCACCTCAG | TGTCTGGGGG | AAGTCAATGG |
|            | CCGGGAGGGG | GGTGTAACTC | AATGAGATGA | GAATAGTTGG | GGGGCGTGAG |
|            | AGATCA     |            |            |            |            |
| FOR_DS1535 | GAGCAATGGT | TCTTCTCTTG | AGCACCTCAG | TGTCTGGGGG | AAGTCAATGG |
|            | CCGGGAGGGG | GGTGTAACTC | AATGAGATGA | GAATAGTTGG | GGGGCGTGAG |
|            | AGATCA     |            |            |            |            |
| MAM1_SP134 | GAGCAATGGT | TCTTCTCTTG | AGCACCTCAG | TGTCTGGGGG | AAGTCAATGG |
|            | CCGGGAGGGG | GGTGTAACTC | AATGAGATGA | GAATAGTTGG | GGGGCGTGAG |
|            | AGATCA     |            |            |            |            |
| MAST_A343_ | GAGCAATGGT | TCTTCTTTTG | AGCGCCTCAG | TGTCTGGGGG | AAGTCAATGG |
|            | CCGGGAGGGG | GGTGTAACTC | AATGAGATGA | GAATAGTTGG | GGGCGGTGAG |
|            | AGATCA     |            |            |            |            |
| SAV1_SE210 | GAGCAATGGT | TCTTCTCTTG | AGCACCTCAG | TGTCTGGGGG | AAGTCAATGG |
|            | CCGGGAGGGG | GGTGTAACTC | AATGAGATGA | GAATAGTTGG | GGGGCGTGAG |
|            | AGATCA     |            |            |            |            |

1 1 1 1 1  
5 93

|            |            |            |            |            |            |
|------------|------------|------------|------------|------------|------------|
| ASIAN2_Ema | TGCAAAAGAG | GCTTTGTAGG | GAATACAAGA | AAATTGGAGA | CCCCTGGGAG |
|            | GGCAGATCTC | GACTTAATAG | GAGCCTGTAA | TTACGTGGCA | AAG        |
| FOR_DS1535 | TGCAAAAGAG | GCTTTGTAGG | GAATACAAGA | AAATTGGAGA | CCCCTGGGAG |
|            | GGCAGATCTC | GACTTAATAG | GAGCCTGTAA | TTACGTGGCA | AAG        |
| MAM1_SP134 | TGCAAAAGAG | GCTTTGTAGG | GAATACAAGA | AAATTGGAGA | CCCCTGGGAG |
|            | GGCAGATCTC | GACTTAATAG | GAGCCTGTAA | TTACGTGGCA | AAG        |
| MAST_A380_ | TGCAAAAGAG | GCTTTGTAGG | GAATACAAGA | AAATTGGAGA | CCCCTGGGAG |
|            | GGCAGATCTC | GACTTAATAG | GAGCCTGTAA | TTACATGGCA | AAG        |
| SAV1_SE210 | TGCAAAAGAG | GCTTTGTAGG | GAATACAAGA | AAATTGGAGA | CCCCTGGGAG |
|            | GGCAGATCTC | GACTTAATAG | GAGCCTGTAA | TTACGTGGCA | AAG        |

1 1 1 1 1  
5 92

|            |            |            |            |            |            |
|------------|------------|------------|------------|------------|------------|
| ASIAN2_Ema | GGAAGAGGAC | CTGGAGGATG | AGAGAGGAGC | CATTGAGGCC | AGGCTGGGGT |
|            | GGGCAAGAGT | CAGGGAGACC | TCGCCAGTGT | CCAGCACAGG | TT         |
| FOR_DS1535 | GGAAGAGGAC | CTGGAGGATG | AGAGAGGAGC | CATTGAGGCC | AGGCTGGGGT |
|            | GGGCAAGAGT | CAGGGAGACC | TCGCCAGTGT | CCAGCACAGG | TT         |
| MAM1_SP134 | GGAAGAGGAC | CTGGAGGATG | AGAGAGGAGC | CATTGAGGCC | AGGCTGGGGT |
|            | GGGCAAGAGT | CAGGGAGACC | TCGCCAGTGT | CCAGCACAGG | TT         |
| MAST_A344_ | GGAAGAGGAC | CTGGAGGATG | AGAGAGGAGC | CACTGAGGCC | AGGCTGGGGT |
|            | GGGCAAGAGT | CAGGGAGACC | TCGCCAGTGT | CCAGCACAGG | TT         |
| SAV1_SE210 | GGAAGAGGAC | CTGGAGGATG | AGAGAGGAGC | CATTGAGGCC | AGGCTGGGGT |
|            | GGGCAAGAGT | CAGGGAGACC | TCGCCAGTGT | CCAGCACAGG | TT         |

1 1 1 1 1  
5 102

|            |            |            |            |            |            |
|------------|------------|------------|------------|------------|------------|
| ASIAN2_Ema | AGGTTTAACT | ACATAGGGAC | CATCTTATTG | AGGAACGTCA | TCACCCTTTG |
|            | TCTCTTCTTC | CTCCCAGAGT | CAAGCTTTCC | CCTTCCCCCT | TACAGTTGTA |
|            | AT         |            |            |            |            |
| FOR_DS1535 | AGGTTTAACT | ACATAGGGAC | CATCTTATTG | AGGAACGTCA | TCACYCTTTG |
|            | TCTCTTCTTC | CTCCCAGAGT | CAAGCTTTCC | CCTTCCCCCT | TACAGTTGTA |
|            | AT         |            |            |            |            |
| MAM1_SP134 | AGGTTTAACT | ACATAGGGAC | CATCTTATTG | AGGAACGTCA | TCACCCTTTG |
|            | TCTCTTCTTC | CTCCCAGAGT | CAAGCTTTCC | CCTTCCCCCT | TACAGTTGTA |
|            | AT         |            |            |            |            |
| MAST_A438_ | AGGTTTTACT | ATATAGGGAT | CATCTTATTG | AGGAATGTCA | CCACCCTTTG |
|            | TCTCTTCTTC | CTCCCAGAGT | CAAGCTTTCC | CCTTCCCCCT | TACAGTTGTA |
|            | AT         |            |            |            |            |
| SAV1_SE210 | AGGTTTAACT | ACATAGGGAC | CATCTTATTG | AGGAACGTCA | TCACCCTTTG |
|            | TCTCTTCTTC | CTCCCAGAGT | CAAGCTTTCC | CCTTCCCCCT | TACAGTTGTA |
|            | AT         |            |            |            |            |

1 1 1 1 1  
5 95

|            |             |            |            |            |            |
|------------|-------------|------------|------------|------------|------------|
| ASIAN2_Ema | CAATCCATAG  | CTAAGTGGGA | CGAGGAAGGA | GCAGTGGACA | GTGCCATGGA |
|            | TTCCCTTGGAC | TTTATTATCT | TGTTTACCTA | GTCTTTTTGA | TGTAG      |
| FOR_DS1535 | CAATCCATAG  | CTAAGTGGGA | CGAGGAAGGA | GCAGTGGACA | GTGCCATGGA |
|            | TTCCCTTGGAC | TTTATTATCT | TGTTTACCTA | GTCTTTTTGA | TGTAG      |
| MAM1_SP134 | CAATCCATAG  | CTAAGTGGGA | CGAGGAAGGA | GCAGTGGACA | GTGCCATGGA |
|            | TTCCCTTGGAC | TTTATTATCT | TGTTTACCTA | GTCTTTTTGA | TGTAG      |
| MAST_A269_ | CAATCCATAG  | CTAAGTGGGA | CGAGGAAGGA | GCAGTGGACA | GTGCCATGGA |
|            | TTCCCTTGGAC | TTTATTATCT | TGTTTACCTA | GTCTTTTTGA | TGTAG      |
| SAV1_SE210 | CAATCCATAG  | CTAAGTGGGA | CGAGGAAGGA | GCAGTGGACA | GTGCCATGGA |
|            | TTCCCTTGGAC | TTTATTATCT | TGTTTACCTA | GTCTTTTTGA | TGTAG      |

1 1 1 1 1  
5 102

|            |            |            |            |            |            |
|------------|------------|------------|------------|------------|------------|
| ASIAN2_Ema | CCAATCCCTG | GAAAAGGACA | TCGTGCTTGG | TAAAGCAGAA | GGTCAGCGAC |
|            | ACAATGGCTG | CAACAA-TGG | GCTCAAACAC | AGGGACAATT | GTGAAGATGG |
|            | CA         |            |            |            |            |
| FOR_DS1535 | CCAATCCCTG | GAAAAGGACA | TCGTGCTTGG | TAAAGCAGAA | GGTCAGCGAC |
|            | ACAATGGCTG | CAACAA-TGG | GCTCAAACAC | AGGGACAATT | GTGAAGATGG |
|            | CA         |            |            |            |            |
| MAM1_SP134 | CCAATCCCTG | GAAAAGGACA | TCGTGCTTGG | TAAAGCAGAA | GGTCAGCGAC |
|            | ACAATGGCTG | CAACAA-TGG | GCTCAAACAC | AGGGACAATT | GTGAAGATGG |
|            | CA         |            |            |            |            |
| MAST_A381_ | CCAATTTCTG | GAAAAGGACA | TCGTGCTTGG | TAAAGCAGAA | GGTCAGCGAC |
|            | ACAATGGCTG | CAACAAACGG | GCTCAAACAC | AGGGACAATT | GTGAAGACGG |
|            | CA         |            |            |            |            |
| SAV1_A381_ | CCAATCCCTG | GAAAAGGACA | TCGTGCTTGG | TAAAGCAGAA | GGTCAGCGAC |
|            | ACAATGGCTG | CAACAA-TGG | GCTCAAACAC | AGGGACAATT | GTGAAGATGG |
|            | CA         |            |            |            |            |

1 1 1 1 1  
5 91

|            |            |            |             |            |            |
|------------|------------|------------|-------------|------------|------------|
| ASIAN2_Ema | ATCTTTTTGC | TCTAACTTTC | ATACAATGTA  | AGTGAGATTC | CAAGTATGCA |
|            | AATGGTGGGA | GGAAAGAAAT | GCATTTTTCAC | TACCCCAATT | A          |

|            |            |            |            |            |            |
|------------|------------|------------|------------|------------|------------|
| FOR_DS1535 | ATCTTTTTGC | TCTAACTTTC | ATACAATGTA | AGTGAGATTC | CAAGTATGCA |
|            | AATGGTGGGA | GGAAAGAAAT | GCATTTTCAC | TACCCCAATT | A          |
| MAM1_SP134 | ATCTTTTTGC | TCTAACTTTC | ATACAATGTA | AGTGAGATTC | CAAGTATGCA |
|            | AATGGTGGGA | GGAAAGAAAT | GCATTTTCAC | TACCCCAATT | A          |
| MAST_A439_ | TTTTTTTTGC | TCTAACTTTC | ATACAATGTA | AGTGAGATTC | CAAGTATGCA |
|            | AATGGTGGGA | GGAAAGAAAT | GCATTTTCAC | TACCCCAATT | A          |
| SAV1_SE210 | ATCTTTTTGC | TCTAACTTTC | ATACAATGTA | AGTGAGATTC | CAAGTATGCA |
|            | AATGGTGGGA | GGAAAGAAAT | GCATTTTCAC | TACCCCAATT | A          |

1 1 1 1 1  
5 94

|            |            |            |            |            |            |
|------------|------------|------------|------------|------------|------------|
| ASIAN2_Ema | ACAGGGTGGC | AGTCTGGGTC | ATCAGAGCCC | TCGTCACTCC | CGGAAGAGCT |
|            | AGCCTTGCCC | CTTCTGGCCC | AGCCTCGCTC | CCTGACTCCT | ACAA       |
| FOR_DS1535 | ACAGGGTGGC | AGTCTGGGTC | ATCAGAGCCC | TCGTCACTCC | CGGAAGAGCT |
|            | AGCCTTGCCC | CTTCTGGCCC | AGCCTCGCTC | CCTGACTCCT | ACAA       |
| MAM1_SP134 | ACAGGGTGGC | AGTCTGGGTC | ATCAGAGCCC | TCGTCACTCC | CGGAAGAGCT |
|            | AGTCTTGCCC | CTTCTGGCCC | AGCCTCGCTC | CCTGACTCCT | ACAA       |
| MAST_A270_ | -CAGGGTGGC | AGTCTGGGTC | ATCAGAGCCC | TCGTCACTCC | CGGAAGAGCT |
|            | AGCCTTGCCC | CTTCTGGCCC | AGCCTCACTC | CCTGACTCCT | ACAA       |
| SAV1_SE210 | ACAGGGTGGC | AGTCTGGGTC | ATCAGAGCCC | TCGTCACTCC | CGGAAGAGCT |
|            | AGTCTTGCCC | CTTCTGGCCC | AGCCTCGCTC | CCTGACTCCT | ACAA       |

1 1 1 1 1  
5 96

|            |            |            |            |            |            |
|------------|------------|------------|------------|------------|------------|
| ASIAN2_Ema | TGCTCCAG-- | -CTTCTTGAT | GGTAGTGAGG | TCCCCCTCAG | CCTCTGTAGG |
|            | ACTGGCCCTT | ATATTCAATT | TCAAGGCTTG | GCCCTCC-AG | CCAGAC     |
| FOR_DS1535 | TGCTCCAG-- | -CTTCTTGAT | GGTAGTGAGG | TCCCCCTCAG | CCTCTGTAGG |
|            | ACTGGCCCTT | ATATTCAATT | TCAAGGCATG | GCCCTCC-AG | CCAGAC     |
| MAM1_SP134 | TGCTCCAG-- | -CTTCTTGAT | GGTAGTGAGG | TCCCCCTCAG | CCTCTGTAGG |
|            | ACTGGCCCTT | ATATTCAATT | TCAAGGCTTG | GCCCTCC-AG | CCAGAC     |
| MAST_A271_ | CATTCCAGGC | TCTTCTTGAT | GGTGGTGAGG | TCCCCCTCAG | CCTCTGTAGG |
|            | ATTGGCCCTT | ATATTCAATT | TCATGGCATG | GCCCTCCCAG | CCAGAC     |
| SAV1_SE210 | TGCTCCAG-- | -CTTCTTGAT | GGTAGTGAGG | TCCCCCTCAG | CCTCTGTAGG |
|            | ACTGGCCCTT | ATATTCAATT | TCAAGGCATG | GCCCTCC-AG | CCAGAC     |

1 1 1 1 1  
5 94

|            |            |            |             |            |            |
|------------|------------|------------|-------------|------------|------------|
| ASIAN2_Ema | TGATACGGCC | ACAGCTCTGC | CGAGAATGGA  | GTCCTGGAT  | GGTGCAAATG |
|            | GCTAAGACGC | TGGGCTCCTA | ACCAAAAAGGT | TAGAGGTTCA | TCTC       |
| FOR_DS1535 | TGATATGGCC | ACAGCTCTGC | CGAGAATGGA  | GTCCTGGAT  | GGTGCAAATG |
|            | GCTAAGACGC | TGGGCTCCTA | ACCAAAAAGGT | TAGAGGTTCA | TCTC       |
| MAM1_SP134 | TGATACGGCC | ACAGCTCTGC | CGAGAATGGA  | GTCCTGGAT  | GGTGCAAATG |
|            | GCTAAGACGC | TGGGCTCCTA | ACCAAAAAGGT | TAGAGGTTCA | TCTC       |
| MAST_A272_ | TGATACAGCC | ACAGCTCTGC | CGAGAATGGA  | GTCCTGGAT  | GGTGCAAATG |
|            | GCTAAGACGC | TGGGCTCCTA | ACCAAAAAGGT | TAGAGGTTCA | TATC       |
| SAV1_SE210 | TGATACGGCC | ACAGCTCTGC | CGAGAATGGA  | GTCCTGGAT  | GGTGCAAATG |
|            | GCTAAGACGC | TGGGCTCCTA | ACCAAAAAGGT | TAGAGGTTCA | TGTC       |

1 1 1 1 1  
5 91

|            |            |            |            |            |            |
|------------|------------|------------|------------|------------|------------|
| ASIAN2_Ema | ATCTGTTGAT | GTCAATTTCT | CCTTTCCTGC | AGCCTGGGCT | GCATCTGTGT |
|            | CCTCCCTGGC | ATCGGTGTGC | ATGCCAGTAG | CTTCTTTTTC | T          |
| FOR_DS1535 | ATCTGTTGAT | GTCAATTTCT | CCTTTCCTGC | AGCCTGGGCT | GCATCTATGT |
|            | CCTCCCTGGC | ATCGGTGTGC | ATGCCAGTAG | CTTCTTTTTC | T          |
| MAM1_SP134 | ATCTGTTGAT | GTCAATTTCT | CCTTTCCTGC | AGCCTGGGCT | GCATCTGTGT |
|            | CCTCCCTGGC | ATCGGTGTGC | ATGCCAGTAG | CTTCTTTTTC | T          |
| MAST_A382_ | ATCTGTTGAT | GTCAATTTCT | CCTTTCCTGC | AGCCTGGGCT | GCGTCTATGT |
|            | CCTCCCTGGC | TTCGGTGTGC | ATGCCAGTAA | CTTCTTTTTC | T          |
| SAV1_SE210 | ATCTGTTGAT | GTCAATTTCT | CCTTTCCTGC | AGCCTGGGCT | GCATCTGTGT |
|            | CCTCCCTGGC | ATTGGTGTGC | RTGCCAGTAG | CTTCTTTTTC | T          |

1 1 1 1 1  
5 104

|            |            |            |            |            |            |
|------------|------------|------------|------------|------------|------------|
| ASIAN2_Ema | GGAGACTGGC | CAAAAAGTGC | TACGGTGGGC | TTACCAGCCC | ATGGAGACAG |
|            | GCAGCTGAAG | CGGGCTTGGC | AGCCACGGA  | GCAAGAGAGC | TGAGTGCCTT |
|            | TGGG       |            |            |            |            |



|            |                                  |                           |                          |                          |                          |
|------------|----------------------------------|---------------------------|--------------------------|--------------------------|--------------------------|
| FOR_DS1535 | GGAGACTGGC<br>GCAGCTGAAG<br>TGGG | CAAAAACCTGC<br>CGGGCTTGGC | TACGGTGGGC<br>AGCCACCGGA | TTACCAGCCC<br>GCAAGAGAGC | ATGGAGACAG<br>TGAGTGCCTT |
| MAM1_SP134 | GGAGACTGGC<br>GCAGCTGAAG<br>TGGG | CAAAAACCTGC<br>CGGGCTTGGC | TACGGTGGGC<br>AGCCACCGGA | TTACCAGCCC<br>GCAAGAGAGC | ATGGAGACAG<br>TGAGTGCCTT |
| MAST_A273_ | GGAGACTGGC<br>GCGGTTGAAG<br>TGGG | CAAAAACCTGC<br>CGGGCTTGGC | TACGGTGGGC<br>AGCCACCGGA | TTACCAGCCC<br>GCAAGAGAGC | ATGGAGACAG<br>TGAGTGCCTT |
| SAV1_SE210 | GGAGACTGGC<br>GCAGCTGAAG<br>TGGG | CAAAAACCTGC<br>CGGGCTTGGC | TACGGTGGGC<br>AGCCACCGGA | TTACCAGCCC<br>GCAAGAGAGC | ATGGAGACAG<br>TGAGTGCCTT |

1 1 1 1 1  
5 103

|            |                                 |                          |                          |                          |                          |
|------------|---------------------------------|--------------------------|--------------------------|--------------------------|--------------------------|
| ASIAN2_Ema | GCAGCCAGGA<br>GGAAGGGG-C<br>AGG | CTCAGACATG<br>AGTTTTGAGA | CCCAGAAGGG<br>GAGGGATAAG | GATGTGGATA<br>TTGGGCAGGG | GGGAGACCTG<br>GGG-CAGGAG |
| FOR_DS1535 | GCAGCCAGGA<br>GGAAGGGG-C<br>AGG | CTCAGACATG<br>AGTTTTGAGA | CCCAGAAGGG<br>GAGGGATAAG | GATGTGGATA<br>GTGGGCAGGG | GGGAGACCTG<br>GGG-CAGGAG |
| MAM1_SP134 | GCAGCCAGGA<br>GGAAGGGG-C<br>AGG | CTCAGACATG<br>AGTTTTGAGA | CCCAGAAGGG<br>GAGGGATAAR | GATGTGGATA<br>GTGGGCAGGG | GGGAGACCTG<br>GGG-CAGGAG |
| MAST_A277_ | GCAGCCAGGA<br>GGAAGGGGGC<br>AGA | CTCAGACATG<br>AGTTTTGAAA | CCCAGAAGGG<br>GAGGGATAAG | GATGTGGATA<br>GTGGGCAGGG | GGGAGATCTG<br>GGGGCAGGAG |
| SAV1_SE210 | GCAGCCAGGA<br>GGAAGGGG-C<br>AGG | CTCAGACATG<br>AGTTTTGAGA | CCCAGAAGGG<br>GAGGGATAAG | GATGTGGATA<br>GTGGGCAGGG | GGGAGACCTG<br>GGG-CAGGAG |

1 1 1 1 1  
5 104

|            |                                  |                          |                          |                          |                          |
|------------|----------------------------------|--------------------------|--------------------------|--------------------------|--------------------------|
| ASIAN2_Ema | CTGCCAAGCT<br>TCTCTAAAAT<br>TCCC | CCTGGTTCTG<br>TGCCCTGCTT | GTCATGAATG<br>ATGAATGCCA | TTATTTGTTT<br>GAGTCCCAGC | TTCTAATTCC<br>AAGCCTTATC |
| FOR_DS1535 | CTGCCAAGCT<br>TCTCTAAAAT<br>TCCC | CCTGGTTCTG<br>TGCCCTGCTT | GTCATGAATG<br>ATGAATGCCA | TTATTTGTTT<br>GAGTCCCAGC | TTCTAATTCC<br>AAGMCTTATC |
| MAM1_SP134 | CTGCCAAGCT<br>TCTCTAAAAT<br>TCCC | CCTGGTTCTG<br>TGCCCTGCTT | GTCATGAATG<br>ATGAATGCCA | TTATTTGTTT<br>GAGTCCCAGC | TTCTAATTCC<br>AAGCCTTATC |
| MAST_A442_ | TTGTCAAGCT<br>TCTTTAAAAT<br>TCCC | TCTGGTTTTG<br>TTCTCTGCTT | GTCATGAATG<br>ATGAATGCCA | TTATTTGTTT<br>GAGTCCCAGC | TTCTAATTCT<br>AAGCCTTATC |
| SAV1_SE210 | CTGCCAAGCT<br>TCTCTAAAAT<br>TCCC | CCTGGTTCTG<br>TGCCCTGCTT | GTCATGAATG<br>ATGAATGCCA | TTATTTGTTT<br>GAGTCCCAGC | TTCTAATTCC<br>AAGCCTTATC |

1 1 1 1 1  
5 107

|            |                                     |                          |                          |                          |                          |
|------------|-------------------------------------|--------------------------|--------------------------|--------------------------|--------------------------|
| ASIAN2_Ema | TTGTTTTATT<br>TAAGAACGTG<br>TTTTTAA | TTATATTTAC<br>TTTGAATGAC | CTTCAAAACA<br>GGGTGTATAA | CATTGGCAAG<br>AAGCAGTAGC | TGTTTTCCCA<br>TTGAAATTTT |
| FOR_DS1535 | TTGTTTTATT<br>TAAGAACGTG<br>TTTTTAA | TTATATTTAC<br>TTTGAATGAC | CTTCAAAACA<br>GGGTGTATAA | CATTGGCAAG<br>WAGCAGTAGC | TGTTTTCCCA<br>TTGAAATTTT |
| MAM1_SP134 | TTGTTTTATT<br>TAAGAACGTG<br>TTTTTAA | TTATATTTAC<br>TTTGAATGAC | CTTCAAAACA<br>GGGTGTATAA | CATTGGCAAG<br>AAGCAGTAGC | TGTTTTCCCA<br>TTGAAATTTT |
| MAST_A278_ | TTGTTTTATT<br>TACGAACATG<br>TTTTTAA | TTATATTTAC<br>TTTGAATGAC | CTTCAAA-CA<br>GGGTGTATAA | TTTTGGCAAG<br>AAGCAGTAGC | TGTTTTCCCA<br>TTGAAATTTT |
| SAV1_SE210 | TTGTTTTATT<br>TAAGAACGTG<br>TTTTTAA | TTATATTTAC<br>TTTGAATGAC | CTTCAAAACA<br>GGGTGTATAA | CATTGGCAAG<br>TAGCAGTAGC | TGTTTTCCCA<br>TTGAAATTTT |

1 1 1 1 1

5 91

|            |            |             |            |            |            |
|------------|------------|-------------|------------|------------|------------|
| ASIAN2_Ema | CTGTGGCTTC | AGTTTAAAGAT | GGGAAGGTGT | GGCCTGCACA | GTCATACCAG |
|            | TGAGTGGATG | CCTGTGGGAG  | GAGGCAGCAG | TTGGAAAGGA | C          |
| FOR_DS1535 | CTGTGGCTTC | AGTTTAAAGAT | GGGAAGGTGT | GGCCTGCACA | GTCATACCAG |
|            | TGAGTGGATG | CCTGTGGGAG  | GAGGCAGCAG | TTGGAAAGGA | C          |
| MAM1_SP134 | CTGTGGCTTC | AGTTTAAAGAT | GGGAAGGTGT | GGCCTGCACA | GTCATACCAG |
|            | TGAGTGGACG | CCTGTGGGAG  | GAGGCAGCAG | TTGGAAAGGA | C          |
| MAST_A385_ | CTGTGGCTTC | AGTTTAAAGAT | GGGAAGGTGT | AGACTGCACA | GTCATACCAG |
|            | TGAGTGGATG | CCTGTGGGAG  | GAGACAGCAT | TTGGAAAGGA | C          |
| SAV1_SE210 | CTGTGGCTTC | AGTTTAAAGAT | GGGAAGGTGT | GGCCTGCACA | GTCATACCAG |
|            | TGAGTGGATG | CCTGTGGGAG  | GAGGCAGCAG | TTGGAAAGGA | C          |

1 1 1 1 1  
5 99

|            |            |            |            |            |            |
|------------|------------|------------|------------|------------|------------|
| ASIAN2_Ema | CCTGGAATTC | AGTGTCTTTT | TCAGCTGTTT | TGGCCTGACC | TCCCAGCTGG |
|            | CTGGGGTCAG | CGCCCCCCGC | TGCTTCAGGG | ACCCCATCCT | GGAGCCTCT  |
| FOR_DS1535 | CCTGGAATTC | AGTGTCTTTT | TCAGCTGTTT | TGGCCTGACC | TCCCAGCTGG |
|            | CTGGGGTCAG | CGCCCCCCGC | TGCTTCAGGG | ACCCCATCCT | GGAGCCTCT  |
| MAM1_SP134 | CCTGGAATTC | AGTGTCTTTT | TCAGCTGTTT | TGGCCTGACC | TCCCAGCTGG |
|            | CTGGGGTCAG | CGCCCCCCGC | TGCTTCAGGG | ACCCCATCCT | GGAGCCTCT  |
| MAST_A279_ | TCTGGAATTC | AGTGTCTTTT | TCAGCTGTTT | TGGCCTGACT | TCCCAGCTGG |
|            | CTGGGGTCAG | CGCCCCCCGC | TGCTTCAGGG | ATCCCATCCT | GGAGCCTCT  |
| SAV1_SE210 | CCTGGAATTC | AGTGTCTTTT | TCAGCTGTTT | TGGCCTGACC | TCCCAGCTGG |
|            | CTGGGGTCAG | CGCCCCCCGC | TGCTTCAGGG | ACCCCATCCT | GGAGCCTCT  |

1 1 1 1 1  
5 112

|            |            |            |            |            |            |
|------------|------------|------------|------------|------------|------------|
| ASIAN2_Ema | CTTACTTCTG | GGTTCTTTCC | AAAAGAGACT | GTTGAGATAA | AACACCACTG |
|            | AAATTCACAG | CAGCCAGAAC | GTCAACTGTT | TTCTTTGAGC | TTTAGGAGCT |
|            | TTCCATTCTC | CA         |            |            |            |
| FOR_DS1535 | CTTACTTCTG | GGTTCTTTCC | AAAAGAGACT | GTTGAGATAA | AACACTATTG |
|            | AAATTCACAG | CAGCCAGAAC | GTCAACTGTT | TTCTTTGAGC | TTTAGGAGCT |
|            | TTCCATTCTC | CA         |            |            |            |
| MAM1_SP134 | CTTACTTCTG | GGTTCTTTCC | AAAAGAGACT | GTTGAGATAA | AACACCATTG |
|            | AAATTCACAG | CAGCCAGAAC | GTCAACTGTT | TTCTTTGAGC | TTTAGGAGCT |
|            | TTCCATTCTC | CA         |            |            |            |
| MAST_A386_ | TTTACTTCTG | GGTTCTTTCC | AAAAGAGACT | GTTGAGATAA | AACACCATTG |
|            | AAATTCACAG | CAGCCAGAAC | GTCAACTGTT | TTCTTTGAGC | TTTAGGAGCT |
|            | TTCCATTCTC | CA         |            |            |            |
| SAV1_SE210 | CTTACTTCTG | GGTTCTTTCC | AAAAGAGACT | GTTGAGATAA | AACACCATTG |
|            | AAATTCACAG | CAGCCAGAAC | GTCAACTGTT | TTCTTTGAGC | TTTAGGAGCT |
|            | TTCCATTCTC | CA         |            |            |            |

1 1 1 1 1  
5 99

|            |            |            |            |            |             |
|------------|------------|------------|------------|------------|-------------|
| ASIAN2_Ema | AAGACATGAG | TCAATATGGA | AT-AGGACTG | AGGTCAGGTT | GAAAAAAAAA  |
|            | --GTGAGAGA | GTTCTGGATT | TCTTTATGGA | TGGGGCACAA | GTGTCCGTA   |
| FOR_DS1535 | AAGACATGAG | TCAATATGGA | ATTAGGACTG | AGGTCAGGTT | GAAAAAAAAA- |
|            | --GTGAGAGA | GTTCTGGATT | TCTTTATGGA | TGGGGCACAA | GTGTCCGTA   |
| MAM1_SP134 | AAGACATGAG | TCAATATGGA | ATTAGGACTG | AGGTCAGGTT | GAAAAAAAAA  |
|            | --GTGAGAGA | GTTCTGGATT | TCTTTATGGA | TGGGGCACAA | GTGTCCGTA   |
| MAST_A387_ | AAGACATGAG | TCAATATGGA | ATTAGGACTG | AGGTCAAGTT | GAAAAAAAAA  |
|            | AAGTGAGAGA | GTTCTGGATT | TCTTTATGGA | TGGGGCACAA | GTGTCCCTA   |
| SAV1_SE210 | AAGACATGAG | TCAATATGGA | ATTAGGACTG | AGGTCAGGTT | GAAAAAAAAA  |
|            | -----      | GTTCTGGATT | TCTTTATGGA | TGGGGCACAA | GTGTCCGTA   |

1 1 1 1 1  
5 91

|            |            |            |            |            |            |
|------------|------------|------------|------------|------------|------------|
| ASIAN2_Ema | TGGAGACTGA | ATGCCATTTG | AGGTCAAGAC | CCAAATTAGA | AACTCTACCC |
|            | AGGAATATTA | AGCTAGAGCT | GGGGTATGGG | GATAAGGGCA | T          |
| FOR_DS1535 | TGGAGACTGA | ATGCCATTTG | AGGTCAAGAC | CCAAATTAGA | AACTCTACCC |
|            | AGGAATATTA | AGCTAGAGCT | GGGGTATGGR | GATAAGGGCA | T          |
| MAM1_SP134 | TGGAGACTGA | ATGCCATTTG | AGGTCAAGAC | CCAAATTAGA | AACTCTACCC |
|            | AGGAATATTA | AGCTAGAGCT | GGGGTATGGG | GATAAGGGCA | T          |
| MAST_A388_ | TGGAGACTGA | ATGCCATTTG | AGGTCAAGAC | CCAAATTAGA | AACTCTACCC |
|            | AAGAATATTA | AGCTAGAGCT | GGGGTATGAA | GATAAGGGCA | C          |

SAV1\_SE210 TGGAGACTGA ATGCCATTTG AGGTCAAGAC CCAAATTAGA AACTCTACCC  
AGGAATATTA AGCTAGAGCT GGGGTATGGG GATAAGGGCA T

1 1 1 1 1  
5 98

ASIAN2\_Ema TGCATGTCGT ATGATTTTTT GAGAGCCCAT AAGCCCCAAA GAAAGGGTCA  
GAGATGCCAG TGAATGTTAG AGCTGGTGAC CTGGAGCAGG TGCTTACA  
FOR\_DS1535 TGCATGTCGT ATGATTTTTT GAGAGCCCAT AAGCCCCAAA GAAAGGGTCA  
GAGATGCCAG TGAATGTTAG AGCTGGTGAC CTGGAGCAGG TGCTTACT  
MAM1\_SP134 TGCATGTCGT ATGATTTTTT GAGAGCCCAT AAGCCCCAAA GAAAGGGTCA  
GAGATGCCAG TGAATGTTAG AGCTGGKGAC CTGGAGCAGG TGCTTACA  
MAST\_A443\_ TGCATGTTGT ATGATTTTTT GAGAGCCCAT AAGCCCCAAA GAAAGGGTCA  
GAGATGCCAG CGAACGTTAG AGCTGGTGAC CTGGAGCAGG AGCTTACA  
SAV1\_SE210 TGCATGTCGT ATGATTTTTT GAGAGCCCAT AAGCCCCAAA GAAAGGGTCA  
GAGATGCCAG TGAATGTTAG AGCTGGTGAC CTGGAGCAGG TGCTTACA

1 1 1 1 1  
5 107

ASIAN2\_Ema CCAAACGCAT T-GCC-GTTG AGTCAATT-C CGACTCAGTG ACCCTATAAA  
AACCGAGGGG AACTGCCCCA TAGGGTTTCT GAGGAAC-AG CTGTTGGATT  
CCAACG  
FOR\_DS1535 CCAAACGCAT T-GCC-GTTG AGTCAATT-C CGACTCAGTG ACCCTATAAA  
AACAGAGGGG AACTGCCCCA TAGGGTTTCT GAGGAAC-AG CTGTTGGATT  
CCAACG  
MAM1\_SP134 CCAAACGCAT T-GCC-GTTG AGTCAATT-C CGACTCAGTG ACCCTATAAA  
AACAGAGGGG AACTGCCCCA TAGGGTTTCT GAGGAAC-AG CTGTTGGATT  
CCAACG  
MAST\_A347\_ CCAAACGCAT TTGTCCGTTG AGTCAATTTT CGACTCAGTG ACCCTATAAA  
AACAGAGGGG AACTGCCCGA TAGGGTTTCT GAGGAACTAG CTGTTGGATT  
CCAACG  
SAV1\_SE210 CCAAACGCAT T-GTC-GTTG AGTCAATT-C CGACTCAGTG ACCCTATAAA  
AACAGAGGGG AACTGCCCCA TAGGGTTTCT GAGGAAC-AG CTGTTGGATT  
CCAACG

1 1 1 1 1  
5 107

ASIAN2\_Ema CGCAAGGGCG CACCCAGCAT GGAGCAGCTC ACCAGGAAGA TGGCTTCGAT  
GTGGCCGATA CCCCAGCGCA GGGAGGAACC CAGGCGGTCC CCGACCCCAG  
CCAACAG  
FOR\_DS1535 CGCAAGGGCG CACCCAGCAT GGAGCAGCTC ACCAGGAAGA TGGCTTCGAT  
GTGGCCGATA CCCCAGCGCA GGGAGGAACC CAGGCGGTCC CCGACCCCAG  
CCAACAG  
MAM1\_SP134 CGCAAGGGCG CACCCAGCAT GGAGCAGCTC ACCAGGAAGA TGGCTTCGAT  
GTGGCCGATA CCCCAGCGCA GGGAGGAACC CAGGCGGTCC CCGACCCCAG  
CCAACAG  
MAST\_A390\_ CGCAAGGGCG CACCCAGCAT GGAGCAACTC ACCAGGAAGA TGGCTTCGAT  
GTGGCCGATA CCCCAGCGCA GGGAGGAACC CAGGCGGTCC CCGACCCCAG  
CCAACAG  
SAV1\_SE210 CGCAAGGGCG CACCCAGCAT GGAGCAGCTC ACCAGGAAGA TGGCTTCGAT  
GTGGCCGATA CCCCAGCGCA GGGAGGAACC CAGGCGGTCC CCGACCCCAG  
CCAACAG

1 1 1 1 1  
5 108

ASIAN2\_Ema CTCAAATAA AATGAAATAA TGTTCT-GGA AACATCAGAA CTCATGTTCC  
CATGAGTCCC CATAAAAATC ACCACACCCG CTGAAATCGT AACCATGTGC  
TGTTTGCA  
FOR\_DS1535 CTCAAATAA AATGAAATAA TGTTCT-GGA AACATCAGAA CTCATGTTCC  
CATGAGTCTC CATAAAAATC ACCACACCCG CTGAAATCGT AACCGTGTGC  
TGTTTGCA  
MAM1\_SP134 CTCAAATAA AATGAAATAA TGTTCT-GGA AACATCAGAA CTCATGTTCC  
CATGAGTCCC CATAAAAATC ACCACACCCG CTGAAATCGT AACCGTGTGC  
TGTTTGCA  
MAST\_A282\_ -TCAAATAA AATGAAATAA TGTTTTTGGG AACATCAGAA CTCGTGTTCC  
CATGAGTCCC CATAAAAATC ACCACACCCG CTGAAATCGT AACCGTGTGC  
TGTTTACA  
SAV1\_SE210 CTCAAATAA AATGAAATAA TGTTCT-GGA AACATCAGAA CTCATGTTCC

CATGAGTCCC CATAAAAATC ACCACACCCG CTGAAATCGT AACCGTGTGC  
TGTTTGCA

1 1 1 1 1  
5 93

|            |            |            |            |            |            |
|------------|------------|------------|------------|------------|------------|
| ASIAN2_Ema | AACTTAAAAC | GTCCTTCTAA | CAGCTTCTTC | TTTTGAAATG | GAGATGTTGT |
| FOR_DS1535 | TGCTAGGTTT | CTCTGAGTCA | GTTCCCACTC | ATAGTGACCA | TGA        |
| MAM1_SP134 | AAYTTAARAC | GTCCTTCTAA | CAGCTTCTTC | TTTTGAAATG | GAGATGTTGT |
| MAST_A393_ | TGCTAGGTTT | CTCTGAGTCA | GTTCCCACTC | ATAGTGACCA | TGA        |
| SAV1_SE210 | AACTTAAAAC | GTCCTTCTAA | CAGCTTCTTC | TTTTGAAATG | GAGATGTTGT |
|            | TGCTAGGTTT | CTCTGAGTCA | GTTCCCACTC | ATAGTGACCA | TGA        |

1 1 1 1 1  
5 93

|            |            |            |            |            |            |
|------------|------------|------------|------------|------------|------------|
| ASIAN2_Ema | CTGGGAACTC | TGGGAGTCTT | TCCTCAGAGG | TGGTGGCAGT | GAAAACAGAG |
| FOR_DS1535 | CAGGAGGGCG | GAGTCACCTG | CTCCCCACAT | TCAGCTCACA | GGG        |
| MAM1_SP134 | CTGGGAACTC | TGGGAGTCTT | TCCTCAGAGG | TGGTGGCAGT | GAAAACAGAG |
| MAST_A283_ | CAGGAGGGCG | GAGTCACCTG | CTCCYCACAT | TCAGCTCACA | GGG        |
| SAV1_SE210 | CTGGGAACTC | TGGGAGTCTT | TCCTCAGAGG | TGGTGGCAGT | GAAAACAGAG |
|            | CAGGAGGGCG | GAGTCACCTG | CTCCCCACAT | TCAGCTCACA | GGG        |

1 1 1 1 1  
5 97

|            |            |            |            |            |            |
|------------|------------|------------|------------|------------|------------|
| ASIAN2_Ema | ATGAAATTTT | TGATGCATAT | GGATTTTTCT | ATTTGCATCC | TTGGG-TGAT |
| FOR_DS1535 | GATATAACTT | CTGCTAACCA | ACTACCTGAG | ACAGCTCTGG | ACACAGG    |
| MAM1_SP134 | ATGAAATTTT | TGATGCATAT | GGATTTTTCT | ATTTGCATCC | TTGGG-TGAT |
| MAST_A285_ | GATATAACTT | CTGCTAACCA | ACTACCTGAG | ACAGCTCTGG | ACACAGG    |
| SAV1_SE210 | ATGAAATTTT | TGATGCATAT | GGATTTTTCT | ATTTGCATCC | TTGGG-TGAT |
|            | GATATAACTT | CTGCTAACCA | ACTACCTGAG | ACAGCTCTGG | ACACAGG    |

1 1 1 1 1  
5 100

|            |            |            |            |            |            |
|------------|------------|------------|------------|------------|------------|
| ASIAN2_Ema | CTAGAGTCTG | TAGTCTTTAT | AAATAAAATC | CAAATAACAC | CTTAGCTGAA |
| FOR_DS1535 | TATAATTTTC | CAGCTTATTG | CTGTTTTGAC | ACAAATGAAA | CCGAGATATA |
| MAM1_SP134 | CTAGAGTCTG | TAGTCTTTAT | AAATAAAATC | CAAATAACAC | CTTAGCTGAA |
| MAST_A445_ | TATAATTTTC | CAGCTTATTG | CTGTTTTGAC | ACAAATGAAA | CCGAGATATA |
| SAV1_SE210 | CTAGAGTCTG | TAGTCTTTAT | AAATAAAATC | CAAATAACAC | CTTAGCTGAA |
|            | TATAATTTTC | CAGCTTATTG | CTGTTTTGAC | ACAAATGAAA | CCGAGATATA |

1 1 1 1 1  
5 93

|            |            |            |            |            |            |
|------------|------------|------------|------------|------------|------------|
| ASIAN2_Ema | ACTTT-GTGA | AAATTCTTCC | TCTCTCTGCC | CACAGCCACC | GAGTTCACTC |
| FOR_DS1535 | CGCAGCAGGG | TTAATGGCTG | TTTCCATATC | CCTCCAGAGA | CAC        |
| MAM1_SP134 | ACTTT-GTGA | AAATTCTTCC | TCTCTCTGCC | CACAGCCACC | GAGTTCACTC |
| MAST_A396_ | CGCAGCAGGG | TTAATGGCTG | TTTCCATATC | CCTCCAGAGA | CAC        |
| SAV1_SE210 | ACTTT-GTGA | AAATTCTTCC | TCTCTCTGCC | CACAGCCACC | GAGTTCACTC |
|            | CGCAGCAGGG | TAAATGGCTG | TTTCCATATC | CCTCCAGAGA | CAC        |

1 1 1 1 1  
5 122

|            |                                       |                                        |                                |                                |                                |
|------------|---------------------------------------|----------------------------------------|--------------------------------|--------------------------------|--------------------------------|
| ASIAN2_Ema | CCCACAGTCA<br>GGAAGTGGGA<br>CTCTCCCCC | CGCGTGGGGA<br>AGTCGCCCCG<br>CGCCCAGAAG | GAAATAAGTC<br>CAGCGTGGGC<br>CA | GAGAAGGCGG<br>CGTTCTCTGA<br>CA | CGGTGTCAGG<br>AAGCCCAGCA<br>CA |
| FOR_DS1535 | CCCACAGTCA<br>GGAAGTGGGA<br>CTCTCCCCC | CGCGTGGGGA<br>AGTCGCCCCG<br>CGCCCAGAAG | GAAATAAGTC<br>CAGCGTGGGC<br>CA | GAGAAGGCGG<br>CGTTCTCTGA<br>CA | CGGTGTCAGG<br>AAGCCCAGCA<br>CA |
| MAM1_SP134 | CCCACAGTCA<br>GGAAGTGGGA<br>CTCTCCCCC | CGCGTGGGGA<br>AGTCGCCCCG<br>-GCCCAGAAG | GAAATAAGTC<br>CAGCGTGGGC<br>CA | GAGAAGGCGG<br>CGTTCTCTGA<br>CA | CGGTGTCAGG<br>AAGCCCAGCA<br>CA |
| MAST_A398_ | CCCACAGTCA<br>GGAAGT----<br>CTCTCCCCC | CGCGTGGGGA<br>---CGCCCCG<br>CGCCCAGAAG | GAAAGAAGTC<br>CAGCGTGGGC<br>CA | GAGAAGGCGG<br>CGTTCTCTGA<br>CA | CGGTGTCAGG<br>AAGCCCAGCA<br>CA |
| SAV1_SE210 | CCCACAGTCA<br>GGAAGTGGGA<br>CTCTCCCCC | CGCGTGGGGA<br>AGTCGCCCCG<br>CGCCCAGAAG | GAAATAAGTC<br>CAGCGTGGGC<br>CA | GAGAAGGCGG<br>CGTTCTCTGA<br>CA | CGGTGTCAGG<br>AAGCCCAGCA<br>CA |

1 1 1 1 1  
5 99

|            |                          |                          |                          |                          |                         |
|------------|--------------------------|--------------------------|--------------------------|--------------------------|-------------------------|
| ASIAN2_Ema | GGGCAAGGAC<br>CCGAGGTCAA | GAGAAGGCAG<br>AAA-GGGGAA | TCAGGGACAG<br>AGTGTTAACA | GAAAGCTGGA<br>ATCAGAACAT | AATGGGAAAC<br>GGAATGTGT |
| FOR_DS1535 | GGGCAAGGAC<br>CCGAGGTCAA | GAGAAGGCAG<br>AAA-GGGGAA | TCAGGGACAG<br>AGTGTTAACA | GAAAGCTGGA<br>ATCAGAACAT | AATGGGAAAC<br>GGAATGTGT |
| MAM1_SP134 | GGGCAAGGAC<br>CCAAGGTCAA | GAGAAGGCAG<br>AAA-GGGGAA | TCAGGGACAG<br>AGTGTTAACA | GAAAGCTGGA<br>ATCAGAACAT | AATGGGAAAC<br>GGAATGTGT |
| MAST_A399_ | GGGCAAGGAC<br>CCGAGGTCAA | GAGAAGGCAG<br>AAAAGGGGAA | TCAGGGGCAG<br>AGTGTTAACA | GAAAGCTGGA<br>ATCAGAACAT | AATGCGGAAC<br>GGAATGTGT |
| SAV1_SE210 | GGGCAAGGAC<br>CCGAGGTCAA | GAGAAGGCAG<br>AAA-GGGGAA | TCAGGGACAG<br>AGTGTTAACA | GAAAGCTGGA<br>ATCAGAACAT | AATGGGAAAC<br>GGAATGTGT |

1 1 1 1 1  
5 105

|            |                                   |                          |                          |                          |                          |
|------------|-----------------------------------|--------------------------|--------------------------|--------------------------|--------------------------|
| ASIAN2_Ema | ACAGATTAGC<br>AGGAAGACTG<br>ACACC | AGGAGTGCTG<br>TGTTCCCCCA | GACCTCATTC<br>-GGCGTGTTG | AGAGATTGCC<br>TCGGTTTGGG | RTGTGGTAAG<br>GC-TGGGGTC |
| FOR_DS1535 | ACAGATTAGC<br>AGGAAGACTG<br>ACACC | AGGAGTGCTG<br>TGTTCCCCCA | GACCTCATTC<br>-GGCGTGTTG | AGAGATTGCC<br>TCGGTTTGGG | GTGTGGTAAG<br>GC-TGGGGTC |
| MAM1_SP134 | ACAGATTAGC<br>AGGAAGACTG<br>ACACC | AGGAGTGCTG<br>TGTTCCCCCA | AACCTCATTC<br>-GGCGTGTTG | AGAGATTGCC<br>TCGGTTTGGG | GTGTGGTAAG<br>GC-TGGGGTC |
| MAST_A401_ | ACAGATTAGC<br>AGGAAGACTG<br>ACACC | AGAAGTGCTG<br>TGTTCCCCCA | GACCTCATTC<br>CGGCGTGTTG | AGAGATTGCC<br>TCGGTTTGGG | ATGTGGTAAG<br>GCGTGGGGTC |
| SAV1_SE210 | ACAGATTAGC<br>AGGAAGACTC<br>ACACC | AGGAGTGCTG<br>TGTTCCCCCA | GACCTCATTC<br>-GGCGTGTTG | AGAGATTGCC<br>TCGGTTTGGG | GTGTGGTAAG<br>GC-TGGGGTC |

1 1 1 1 1  
5 109

|            |                                       |                          |                          |                           |                          |
|------------|---------------------------------------|--------------------------|--------------------------|---------------------------|--------------------------|
| ASIAN2_Ema | GCTGAAATGC<br>TGTTGAAGTG<br>TGTTCTTTT | AGCAAAGGAA<br>ATGGTATTGA | TAAATTCCTA<br>GGCGGTATAT | CTTGTGGGAA<br>CATT--TTCT  | GAAATTTGTT<br>TGTGGGA-AT |
| FOR_DS1535 | GCTGAAATGC<br>TGTTGAAGTG<br>TGTTCTTTT | AGCAAAGGAA<br>ATGGTATTGA | TAAATTCCTA<br>GGCGGTATAT | CTTGTGGGAA<br>CATT--TTCT  | GAAATTTGTT<br>TGTGGGA-AT |
| MAM1_SP134 | GCTGAAATGC<br>TGTTGAAGTG<br>TGTTCTTTT | AGCAAAGGAA<br>ATGGTATTGA | TAAATTYTTA<br>GGCGGTATAT | CTTGTGGGAA<br>CATT--TTCT  | GAAATTTGTT<br>TGTGGGA-AT |
| MAST_A286_ | GTTGAAATGC<br>TGTTGAAGTG<br>TTTCCCGTT | AGCAAAGGAA<br>ATGGTATTGA | TAAATTCCTA<br>GGCGGTATAT | CTTGTGGGAA<br>CATT-CATATT | GAAATTTGTT<br>TAAACGACAT |
| SAV1_SE210 | GCTGAAATGC<br>TGTTGAAGTG<br>TGTTCTTTT | AGCAAAGGAA<br>ATGGTATTGA | TAAATTCCTA<br>GGCGGTATAT | CTTGTGGGAA<br>CATT--TTCT  | GAAATTTGTT<br>TGTGGGA-AT |

1 1 1 1 1  
5 90

|            |            |            |            |            |            |
|------------|------------|------------|------------|------------|------------|
| ASIAN2_Ema | CTTCGCATGG | GCATGACTGT | GCACATGGAA | TGTGCTGAAT | CTGGTTTGAA |
|            | CTACCAAGAC | CTGTACAAGT | AACCTCAGCT | TCTGGAGTGT |            |
| FOR_DS1535 | CTTCGCATGG | GCATGACTGT | GCACATGGAA | TGTGCTGAAT | CTGGTTTGAA |
|            | CTACCAAGAC | CTGTACAAGT | AACCTCAGCT | TCTGGAGTGT |            |
| MAM1_SP134 | CTTCACATGG | GCATGACTGT | GCACATGGAA | TGTGCTGAAT | CTGGTTTGAA |
|            | CTACCAAGAC | CTGTACAAGT | AACCTCAGCT | TCTGGAGTGT |            |
| MAST_A450_ | CTTCGCATGG | GCATGACTGT | GCACATGGAA | TGTGCTGAAT | CTGGTTTGAA |
|            | CTACCAAGAC | CTGTGCAAGT | AACCTCAGCT | TCTGGAGTGT |            |
| SAV1_SE210 | CTTCGCATGG | GCATGACTGT | GCACATGGAA | TGTGCTGAAT | CTGGTTTGAA |
|            | CTACCAAGAC | CTGTACAAGT | AACCTCAGCT | TCTGGAGTGT |            |

1 1 1 1 1  
5 102

|            |             |            |            |            |            |
|------------|-------------|------------|------------|------------|------------|
| ASIAN2_Ema | ACCAAAAAGAC | CTTTCCCAGA | AGGCCAGAGG | GGAGCCACCT | ATGGGGGCAG |
|            | GGCAGATGGA  | ACCCTGCCCT | GTGCAGTTGG | AACAGTTTTT | -GGATTTCCC |
|            | CA          |            |            |            |            |
| FOR_DS1535 | ACCAAAAAGAC | TTTTCC-AGA | AGGCCAGAGG | GGAGCCACCT | ATGGGGGCAG |
|            | GGCAGATGGA  | ACCCTGCCCT | GTGCAGTTGG | AACAGTTTTT | -GGATTTCCC |
|            | CA          |            |            |            |            |
| MAM1_SP134 | ACCAAAAAGAC | CTTTCCCAGA | AGGCCAGAGG | GGAGCCACCT | ATGGGGGCAG |
|            | GGCAGATGGA  | ACCCTGCCCT | GTGCAGTTGG | AACAGTTTTT | -GTATTTCCC |
|            | CA          |            |            |            |            |
| MAST_A404_ | ACCAAAAAGAC | TTTTCCCAGA | AGGCCAGAGG | GGAGCCACCT | ATGGGGGCAG |
|            | GGCAGATGGA  | ACCCTGCCCT | GTGCAGTTGG | AACAGTTTTT | -GGATTTCCC |
|            | CA          |            |            |            |            |
| SAV1_SE210 | ACCAAAAAGAC | CTTTCCCAGA | AGGCCAGAGG | GGAGCCACCT | ATGGGGGCAG |
|            | GGCAGATGGA  | ACCCTGCCCT | GTGCAGTTGG | AACAGTTTTT | TGGATTTCCC |
|            | CA          |            |            |            |            |

1 1 1 1 1  
5 109

|            |            |            |            |            |            |
|------------|------------|------------|------------|------------|------------|
| ASIAN2_Ema | CTTTCCCTTT | -GCATTCACA | ACTTGGCTAA | CTGTTGGACG | CAAGAGGCCT |
|            | AGTTTTTGGC | CTGTCTTGGC | TTTCGACATG | CCTTCCTCAC | TAAGCTTAAT |
|            | CATTTCTAG  |            |            |            |            |
| FOR_DS1535 | CTTTCCCTTT | -GCATTCACA | ACTTGGCTAA | CTGTTGGACG | CAAGAGGCCT |
|            | AGTTTTTGGC | CTGTCTTGGC | TTTCAACATG | CCTTCCTCAC | TAAGCTTAAT |
|            | CATTTCTAG  |            |            |            |            |
| MAM1_SP134 | CTTTCCCTTT | -GCATTCACA | ACTTGGCTAA | CTGTTGGACG | CAAGAGGCCT |
|            | AGTTTTTGGC | CTGTCTTGGC | TTTCGACATG | CCTTCCTCAC | TAAGCTTAAT |
|            | CATTTCTAG  |            |            |            |            |
| MAST_A451_ | CTTTTCTTTT | TGCGTTTATA | ACTTGGCTAA | CTGTTGGGTG | CAAGAGGCCT |
|            | AGTTTTTGGC | CTGTCTTGGC | TTTCAACTTG | CCTCCCTCAC | TAAGCTTAAT |
|            | CATTTCTAG  |            |            |            |            |
| SAV1_SE210 | CTTTCCCTTT | -GCATTCACA | ACTTGGCTAA | CTGTTGGACG | CAAGAGGCCT |
|            | AGTTTTTGGC | CTGTCTTGGC | TTTCAACATG | CCTTCCTCAC | TAAGCTTAAT |
|            | CATTTCTAG  |            |            |            |            |

1 1 1 1 1  
5 106

|            |            |            |            |            |            |
|------------|------------|------------|------------|------------|------------|
| ASIAN2_Ema | TTTCTCCTGA | AGCCGATGCC | CTGAATTTGG | ATTTGCAACC | TACTAGACTG |
|            | TGAGATAAAA | A-TTTCTCTT | TGTTAAAGCC | ATCCAATTGT | GGTATTTCTG |
|            | TTATGG     |            |            |            |            |
| FOR_DS1535 | TTTCTCCTGA | AGSCGATGCC | CTGAATTTGG | ATTTGCAACC | TACTAGACTG |
|            | TGAGATAAAA | AATTTCTCTT | TGTTAAAGCC | ATCCAATTGT | GGTATTTCTG |
|            | TTATGG     |            |            |            |            |
| MAM1_SP134 | TTTCTCCTGA | AGCCGATGCC | CTGAATTTGG | ATTTGCAACC | TACTAGACTG |
|            | TGAGATAAAA | AATTTCTCTT | TGTTAAAGCC | ATCCAATTGT | GGTATTTCTG |
|            | TTATGG     |            |            |            |            |
| MAST_A405_ | TTTCTCCTGA | AGCCGATGCC | CTGAATTTGG | ATTTGCAACC | TACTAGACTG |
|            | TGAGATAAAA | AATTTCTCTA | TGTTAAAGCC | ATCCAATTGT | GGTATTTCTG |
|            | TTATGG     |            |            |            |            |
| SAV1_SE210 | TTTCTCCTGA | AGGCGATGCC | CTGAATTTGG | ATTTGCAACC | TACTAGACTG |
|            | TGAGATAAAA | AATTTCTCTT | TGTTAAAGCC | ATCCAATTGT | GGTATTTCTG |
|            | TTATGG     |            |            |            |            |

1 1 1 1 1  
5 109

|            |                                       |                                        |                          |                          |                          |
|------------|---------------------------------------|----------------------------------------|--------------------------|--------------------------|--------------------------|
| ASIAN2_Ema | AATAAGGGCT<br>TGGGCGCTTC<br>CTGGCACAT | TGAAGCCACA<br>TCAAATTGCA<br>GGCCTCTCCT | TTATTGAATA<br>GGCCTCTCCT | TCCCAACCCA<br>CTTGCAAGTC | CCATAAAGGT<br>GCAAAATAAA |
| FOR_DS1535 | AATAAGGGCT<br>TGGGCGCTTC<br>CTGGCACAT | TGAAGCCACA<br>TCAAATTGCA<br>GGCCTCTCCT | TTATTGAATA<br>GGCCTCTCCT | TCCCAACCCA<br>CTTGCAAGTC | CCATAAAGGT<br>GCAAAATAAA |
| MAM1_SP134 | AATAAGGGCT<br>TGGGCGCTTC<br>CTGGCACAT | TGAAGCCACA<br>TCAAATTGCA<br>GGCCTCTCCT | TTATTGAATA<br>GGCCTCTCCT | TCCCAACCCA<br>CTTGCAAGTC | CCATAAAGGT<br>GCAAAATAAA |
| MAST_A454_ | AATAAGGGCT<br>TGGGCGCTTC<br>CTGCGACAA | TGAAGCCACA<br>TCAAATTGCA<br>GGCCTCTCCT | TTATTGAATA<br>GGCCTCTCCT | TCCCAACCCA<br>CTTGTAAGTC | CCATAAAGTT<br>ACAAAATAAA |
| SAV1_SE210 | AATAAGGGCT<br>TGGGCGCTTC<br>CTGGCACAT | TGAAGCCACA<br>TCAAATTGCA<br>GGCCTCTCCT | TTATTGAATA<br>GGCCTCTCCT | TCCCAACCCA<br>CTTGCAAGTC | CCATAAAGGT<br>ACAAAATAAA |

1 1 1 1 1  
5 93

|            |                          |                          |                          |                          |                   |
|------------|--------------------------|--------------------------|--------------------------|--------------------------|-------------------|
| ASIAN2_Ema | CCATGCCCT<br>GACCTCTGCT  | GGGCCCCTTG<br>GCTGCCTCCC | CAGCTACTAC<br>GGGGCTGCAG | ATCTGCTGCG<br>CTGCCCGATG | GAAGTTTACA<br>CAC |
| FOR_DS1535 | CCATGCCCT<br>GACCTCTGCT  | GGGCCCCTTG<br>GCTGCCTCCC | CAGCTACTAC<br>GGGGCTGCAG | ATCTGCTGCG<br>CTGCCCGATG | GAAGTTTACA<br>CAC |
| MAM1_SP134 | CCATGCCCT<br>GACCTCTGCT  | GGGCCCCTTG<br>GCTGCCTCCC | CAGCTACTAC<br>GGGGCTGCAG | ATCTGCTGCG<br>CTGCCCGATG | GAAGTTTACA<br>CAT |
| MAST_A407_ | CCAAATCCCA<br>GACCTCTGCT | GGCCCC-TTA<br>GCTGCCTCCC | CAGCCACTAC<br>GGGGCTGCAG | ATCTGCTGCA<br>CTGCCCGACG | GAAGTTTACA<br>CGC |
| SAV1_SE210 | CCATGCCCT<br>GACCTCTGCT  | GGGCCCCTTG<br>GCTGCCTCCC | CAGCTACTAC<br>GGGGCTGCAG | ATCTGCTGCG<br>CTGCCCGATG | GAAGTTTACA<br>CGC |

1 1 1 1 1  
5 93

|            |                          |                          |                          |                          |                   |
|------------|--------------------------|--------------------------|--------------------------|--------------------------|-------------------|
| ASIAN2_Ema | CCTTCAGGAG<br>CTCCAGGCCC | TGAAACCTCA<br>CCGCGTCTCT | GAGTTGTTTT<br>GAGTCCTGGT | TGACCCCTCG<br>TGTGCTGCAT | CTGCCCCAGA<br>CTT |
| FOR_DS1535 | CCTTCAGGAG<br>CTCCAGGCCC | TGAAACCTCA<br>CCGCGTCTCT | GAGTTGTTTT<br>GAGTCCTGGT | TGACCCCTCG<br>TGTGCTGCAT | CTGCCCCAGA<br>CTT |
| MAM1_SP134 | CCTTCAGGAG<br>CTCCAGGCCC | TGAAACCTCA<br>CCGCGTCTCT | GAGTTGTTTT<br>GAGTCCTGCT | TGACCCCTCG<br>TGTGCTGCAT | CTGCCCCAGA<br>CTT |
| MAST_A409_ | CCTTCAGGAG<br>CTCCAGGCCC | TGAAACCTCA<br>CCGCGTCTCT | GAGTTGTTTT<br>GAGTCCTGAT | TGACCCCTCG<br>TGTGCTGCCT | CTGCCCCAGA<br>CTT |
| SAV1_SE210 | CCTTCAGGAG<br>CTCCAGGCCC | TGAAACCTCA<br>CCGCGTCTCT | GAGTTGTTTT<br>GAGTCCTGGT | TGACCCCTCG<br>TGTGCTGCAT | CTGCCCCAGA<br>CTT |

1 1 1 1 1  
5 91

|            |                          |                          |                          |                          |                 |
|------------|--------------------------|--------------------------|--------------------------|--------------------------|-----------------|
| ASIAN2_Ema | GCTAGTCAGT<br>TGGCTATGTG | TGATTGGCTA<br>AGCATGTCTT | TGTGAATGTT<br>CAAGTGCAGA | GGGGCAGCTG<br>TTGAGAAAAT | GTCAGTAAGG<br>A |
| FOR_DS1535 | GCTAGTCAGT<br>TGGCTATGTG | TGATTGGCTA<br>AGCATGTCTT | TGTGAATGTT<br>CAAGTGCAGA | GGGGCAGCTG<br>TTGAGAAAAT | GTCAGTAAGG<br>A |
| MAM1_SP134 | GCTAGTCAGT<br>TGGCTATGTG | TGATTGGCTA<br>AGCATGTCTT | TGTGAATGTT<br>CAAGTGCAGA | GGGGCAGCTG<br>TTGAGAAAAT | GTCAGTAAGG<br>A |
| MAST_A456_ | GCTAGTTAGT<br>TGGCTGTGTG | TGATTGGCTA<br>AGCATGTCTT | TGTGAATGTT<br>CAAGTGCAGA | GGGGCAGCTG<br>TTGAGAAAAT | GTCAGTAAGG<br>A |
| SAV1_SE210 | GCTAGTCAGT<br>TGGCTATGTG | TGATTGGCTA<br>AGTATGTCTT | TGTGAATGTG<br>CAAGTGCAGA | GGGGCAGCTG<br>TTGAGAAAAT | GTCAGTAAGG<br>A |

1 1 1 1 1  
5 95

|            |                          |                          |                          |                          |                     |
|------------|--------------------------|--------------------------|--------------------------|--------------------------|---------------------|
| ASIAN2_Ema | CTGAATCTAC<br>CAATCTGCAG | ATGCCTCTTG<br>ATACTGTGAG | TTTTATTTCT<br>GTACAGATTA | CTTTAAACTT<br>TACTGTCGGC | GAAGAACAGT<br>TACTG |
| FOR_DS1535 | CTGAATCTAC<br>CAATCTGCAG | ATGCCTCTTG<br>ATACTGTGAG | TTTTATTTCT<br>GTACAGATTA | CTTTAAACTT<br>TACTGTCGGC | GAAGAACAGT<br>TACTG |
| MAM1_SP134 | CTGAATCTAC<br>CAATCTGCAG | ATGCCTCTTG<br>ATACTGTGAG | TTTTATTTCT<br>GTACAGATTA | CTTTAAACTT<br>TACTGTCGGC | GAAGAACAGT<br>TACTG |

|            |            |            |            |            |            |
|------------|------------|------------|------------|------------|------------|
| MAST_A289_ | TTGAATCTAC | ATGCCTCTTG | TTTTATTTCT | CTTTAAACTT | GAAGAACAGT |
| SAV1_SE210 | CAATCTGCAG | ATACTGTGAG | GTACAGATTA | TACTGTCCGG | TACTG      |
|            | CTGAATCTAC | ATGCCTCTTG | TTTTATTTCT | CTTTAAACTT | GAAGAACAGT |
|            | CAATCTGCAG | ATACTGTGAG | GTACAGATTA | TACTGTCCGG | TACTG      |

1 1 1 1 1  
5 92

|            |            |            |            |            |            |
|------------|------------|------------|------------|------------|------------|
| ASIAN2_Ema | GAGGTTTCTT | CCTGCTGCCT | CAGTGTGTGG | AATGGGGCTA | GAGGCTGTAG |
| FOR_DS1535 | CTAGGCCACC | CACCCACAAT | GCTCTGACCA | CGTTGCCTTC | TT         |
| MAM1_SP134 | GAGGTTTCTT | CCTGCTGCCT | CAGTGTGTGG | AACGGGGCTA | GAGGCTGTAG |
| MAST_A410_ | CTAGGCCACC | CACCCACAAT | GCTCTGACCA | CGTTGCCTTC | TT         |
| SAV1_SE210 | GAGGTTTCTT | CCTGCTGCCT | CAGTGTGTGG | AATGGGGCTA | GAGGCTGTAG |
|            | CTAGGCCACC | CACCCACAAT | GCTCTGACCA | CGTTGCCTTC | TT         |

1 1 1 1 1  
5 107

|            |            |            |            |            |            |
|------------|------------|------------|------------|------------|------------|
| ASIAN2_Ema | AGCTTTGTGG | AAGGAAGACC | AGTCAGAAGT | AGGCCTACCC | TGGCAGAGAG |
| FOR_DS1535 | GAACCTGGAG | GGGAGTGGGG | ACTAGGTGAA | CACCAAAAAA | GGTTCAGCTC |
| MAM1_SP134 | TCAGTCA    |            |            |            |            |
| MAST_A412_ | AGCTTTGTGG | AAGGAAGACC | AGTCAGAAGT | AGGCCTACCC | TGGCAGAGAG |
| SAV1_SE210 | GAACCTGGAG | GGGAGTGGGG | ACTAGGTGAA | CACCAAAAAA | GGTTCAGCTC |
|            | TCAGTCA    |            |            |            |            |

1 1 1 1 1  
5 101

|            |            |            |            |            |            |
|------------|------------|------------|------------|------------|------------|
| ASIAN2_Ema | AATTTTATTT | GCCAGATAAT | AGTAACACGG | GTCTTAAAAC | TTAAACAGTT |
| FOR_DS1535 | TTGAGCGACG | ATGTCTTAGC | CACATCACCA | CTCCAATATT | TAGCTGTTTT |
| MAM1_SP134 | T          |            |            |            |            |
| MAST_A414_ | AATTTTATTT | GCCAGATAAT | AGTAACACGG | GTCTTAAAAC | TTAAACAGTT |
| SAV1_SE210 | TTGAGCGACG | ATGTCTTAGC | CACATCACCA | CTCCAATATT | TAGCTGTTTT |
|            | T          |            |            |            |            |

1 1 1 1 1  
5 114

|            |            |            |            |            |            |
|------------|------------|------------|------------|------------|------------|
| ASIAN2_Ema | AAAAGAGGTG | TGGGCTACCC | TTCCAGAAAA | -GAGTGAACA | GAAATGCAAA |
| FOR_DS1535 | CAATTTCCAG | AGTGTCTGGG | CATGTGGCCA | TGCTTGGCAC | TCCACAGTTT |
| MAM1_SP134 | ACAGTTAGTT | CCCT       |            |            |            |
| MAST_A291_ | AAAAGAGGTG | TGGGCTACCC | TTCCAGAAAA | -GAGTGAACA | GAAATGCAAA |
|            | CAATTTCCAG | AGTGTCTGGG | CATGTGGCCA | TGCTTGGCAC | TCCACAGTTT |
|            | ACAGTTAGTT | CCCT       |            |            |            |



|            |                                                      |                                          |                          |                          |                          |
|------------|------------------------------------------------------|------------------------------------------|--------------------------|--------------------------|--------------------------|
| SAV1_SE210 | ACAGTTAGTT<br>AAAAGAGGTG<br>CAATTTCCAG<br>ACAGTTAGTT | CCCC<br>TGGGCTACCC<br>AGTGTCTGGG<br>CCCT | TTCCAGAAAA<br>CATGTGGCCA | -GAGTGAACA<br>TGCTTGGCAC | GAAATGCAAA<br>TCCACAGTTT |
|------------|------------------------------------------------------|------------------------------------------|--------------------------|--------------------------|--------------------------|

1 1 1 1 1  
5 162

|            |                                                      |                                               |                                         |                                    |                                        |
|------------|------------------------------------------------------|-----------------------------------------------|-----------------------------------------|------------------------------------|----------------------------------------|
| ASIAN2_Ema | GGGAA-GTCT<br>CACATTCTCA<br>CACGTTGCTG<br>CCCCAGGCAC | GGTGGGAGAA<br>GGCCTAACAA-<br>TCAAGTCAGC<br>TA | AAGTGGGGCA<br>CACATAACA-<br>CCT-CAA---- | GGGGTGGGCA<br>CAAATCCAAA<br>-----C | GGAGGAACAC<br>AA--TC-AAA<br>TTATGGC-GA |
|------------|------------------------------------------------------|-----------------------------------------------|-----------------------------------------|------------------------------------|----------------------------------------|

|            |                                                      |                                               |                                         |                                    |                                        |
|------------|------------------------------------------------------|-----------------------------------------------|-----------------------------------------|------------------------------------|----------------------------------------|
| FOR_DS1535 | GGGAA-GTCT<br>CACATTCTCA<br>CACGTTGCTG<br>CCCCAGGCAC | GGTGGGAGAA<br>GGCCTAACAA-<br>TCAAGTCAGC<br>TA | AAGTGGGGCA<br>CACATAACA-<br>CCT-CAA---- | GGGGTGGGCA<br>CAAATCCAAA<br>-----C | GGAGGAACAC<br>AA--TC-AAA<br>TTATGGC-GA |
|------------|------------------------------------------------------|-----------------------------------------------|-----------------------------------------|------------------------------------|----------------------------------------|

|            |                                                      |                                               |                                         |                                    |                                        |
|------------|------------------------------------------------------|-----------------------------------------------|-----------------------------------------|------------------------------------|----------------------------------------|
| MAM1_SP134 | GGGGA-GTCT<br>CACATTCTCA<br>CACGTTGCTG<br>CCCCAGGCAC | GGTGGGAGAA<br>GGCCTAACAA-<br>TCAAGTCAGC<br>TA | AAGTGGGGCA<br>CACATAACA-<br>CCT-CAA---- | GGGGTGGGCA<br>CAAATCCAAA<br>-----C | GGAGGAACAC<br>AA--TC-AAA<br>TTATGGC-GA |
|------------|------------------------------------------------------|-----------------------------------------------|-----------------------------------------|------------------------------------|----------------------------------------|

|            |                                                      |                                              |                                        |                                         |                                        |
|------------|------------------------------------------------------|----------------------------------------------|----------------------------------------|-----------------------------------------|----------------------------------------|
| MAST_B003_ | GGGAAGGTCT<br>CACATTCTCA<br>CACATTGCTG<br>CTCTCTACCT | GGTGGGAGAA<br>GGCCTAACAC<br>TCAAGTCA-C<br>TA | AAGTGGGGCA<br>CACATAACAC<br>CTTAGAAGAG | GGGGTGGGCA<br>CAGATCCAAA<br>TGTTCTCTGTC | GGAGGAACAC<br>AAACTCAAAA<br>TTTTCACTGA |
|------------|------------------------------------------------------|----------------------------------------------|----------------------------------------|-----------------------------------------|----------------------------------------|

|            |                                                      |                                               |                                         |                                    |                                        |
|------------|------------------------------------------------------|-----------------------------------------------|-----------------------------------------|------------------------------------|----------------------------------------|
| SAV1_SE210 | GGGAA-GTCT<br>CACATTCTCA<br>CACGTTGCTG<br>CCCCAGGCAC | GGTGGGAGAA<br>GGCCTAACAA-<br>TCAAGTCAGC<br>TA | AAGTGGGGCA<br>CACATAACA-<br>CCT-CAA---- | GGGGTGGGCA<br>CAAATCCAAA<br>-----C | GGAGGAACAT<br>AA--TC-AAA<br>TTATGGC-GA |
|------------|------------------------------------------------------|-----------------------------------------------|-----------------------------------------|------------------------------------|----------------------------------------|

1 1 1 1 1  
5 148

|            |                                        |                                        |                                        |                                        |                                      |
|------------|----------------------------------------|----------------------------------------|----------------------------------------|----------------------------------------|--------------------------------------|
| ASIAN2_Ema | AGGCCCATTT<br>CTCGTCCTCT<br>AGGGCAGCTG | GCCTCCTTAC<br>AGCAGGAGAC<br>CTACCCGCTT | TGAGGAYGGC<br>CCAGGTTGTA<br>GTCAGTGGTA | AGTGGTCCAG<br>TTCCTGGCTA<br>GCTTGCGTGT | TGGCAGAATT<br>ACGCACCTCC<br>TGCTATGA |
|------------|----------------------------------------|----------------------------------------|----------------------------------------|----------------------------------------|--------------------------------------|

|            |                                        |                                        |                                        |                                        |                                      |
|------------|----------------------------------------|----------------------------------------|----------------------------------------|----------------------------------------|--------------------------------------|
| FOR_DS1535 | AGGCCCATTT<br>CTCGTCCTCT<br>AGGGCAGCTG | GCCTCCTTAC<br>AGCAGGAGAC<br>CTACCCGCTT | TGAGGACGGC<br>CCAGGTTGTA<br>GTCAGTGGAA | AGTGGTCCAG<br>TTCCTGGCTA<br>GCTTGCGTGT | TGGCAGAATT<br>ACGCACCTCC<br>TGCTATGA |
|------------|----------------------------------------|----------------------------------------|----------------------------------------|----------------------------------------|--------------------------------------|

|            |                                        |                                        |                                        |                                        |                                      |
|------------|----------------------------------------|----------------------------------------|----------------------------------------|----------------------------------------|--------------------------------------|
| MAM1_SP134 | AGGCCCATTT<br>CTCGTCCTCT<br>AGGGCAGCTG | GCCTCCTTAC<br>AGCAGGAGAC<br>CTACCCGCTT | TGAGGACGGC<br>CCAGGTTGTA<br>GTCAGTGGAA | AGTGGTCCAG<br>TTCCTGGCTA<br>GCTTGCGTGT | TGGCAGAATT<br>ACGCACCTCC<br>TGCTATGA |
|------------|----------------------------------------|----------------------------------------|----------------------------------------|----------------------------------------|--------------------------------------|

|            |                                        |                                        |                                        |                                        |                                      |
|------------|----------------------------------------|----------------------------------------|----------------------------------------|----------------------------------------|--------------------------------------|
| MAST_B008_ | AGGCCCATTT<br>CTTGTCCTCT<br>AGTGCAGCTG | GCCTCCTTAC<br>AGCAGGAGAC<br>CTACCCGCTT | TGAGGACGGC<br>CCAGGTTGTA<br>GTCAGTGGAA | AGTGGTCCAG<br>TTCCTGGCTA<br>GCTTGCGTGT | TGGCAGAATT<br>ACGCACCTCC<br>TGCTATGA |
|------------|----------------------------------------|----------------------------------------|----------------------------------------|----------------------------------------|--------------------------------------|

|            |                                        |                                        |                                        |                                        |                                      |
|------------|----------------------------------------|----------------------------------------|----------------------------------------|----------------------------------------|--------------------------------------|
| SAV1_SE210 | AGGCCCATTT<br>CTCGTCCTCT<br>AGGGCAGCTG | GCCTCCTTAC<br>AGCAGGAGAC<br>CTACCCGCTT | TGAGGACGGC<br>CCAGGTTGTA<br>GTCAGTGGAA | AGTGGTCCAG<br>TTCCTGGCTA<br>GCTTGCGTGT | TGGCAGAATT<br>ACGCACCTCC<br>TGCTATGA |
|------------|----------------------------------------|----------------------------------------|----------------------------------------|----------------------------------------|--------------------------------------|

|            |                                        |                                        |                                        |                                        |                                  |
|------------|----------------------------------------|----------------------------------------|----------------------------------------|----------------------------------------|----------------------------------|
| ASIAN2_Ema | ACTGGGGACA<br>TGCCTCTAGG<br>GAATTTCAAT | TTTATGTTTG<br>AAGGAAGTCT<br>AGG-TCTCTC | CTGGTTACTA<br>AGTGGAGGGG<br>TTCCTCCTCA | CGGAAATTAC<br>GCTTAGGGAG<br>TATCTCTTTT | TATGGATTAC<br>GAGGTTTACC<br>TGCT |
|------------|----------------------------------------|----------------------------------------|----------------------------------------|----------------------------------------|----------------------------------|

|            |                                        |                                        |                                        |                                        |                                  |
|------------|----------------------------------------|----------------------------------------|----------------------------------------|----------------------------------------|----------------------------------|
| FOR_DS1535 | ACTGGGGACA<br>TGCCTCTAGG<br>GAATTTCAAT | TTTATGTTTG<br>AAGGAAGTCT<br>AGG-TCTCTC | CTGGTTACTA<br>AGTGGAGGGG<br>TTCCTCCTCA | CGGAAATTAC<br>GCTTAGGGAG<br>TATCTCTTTT | TATGGATTAC<br>GAGGTTTACC<br>TGCT |
|------------|----------------------------------------|----------------------------------------|----------------------------------------|----------------------------------------|----------------------------------|

|            |                                        |                                        |                                        |                                        |                                  |
|------------|----------------------------------------|----------------------------------------|----------------------------------------|----------------------------------------|----------------------------------|
| MAM1_SP134 | ACTGGGGACA<br>TGCCTCTAGG<br>GRATTTCAAT | TTTATGTTTG<br>AAGGAAGTCT<br>AGG-TCTCTC | CTGGTTACTA<br>AGTGGAGGGG<br>TTCCTCCTCA | CGGAAATTAC<br>GCTTAGGGAG<br>TATCTCTTTT | TATGGATTAC<br>GAGGTTTACC<br>TGCT |
|------------|----------------------------------------|----------------------------------------|----------------------------------------|----------------------------------------|----------------------------------|

|            |                                        |                                        |                                        |                                        |                                  |
|------------|----------------------------------------|----------------------------------------|----------------------------------------|----------------------------------------|----------------------------------|
| MAST_B011_ | ATTGGGGATA<br>TGCCTCTAGG<br>GAATTTCAAT | TTTATGTTTG<br>AAGGAAGTCT<br>AGGGTCTCTC | CTGGTTACTA<br>AGTGGAGGGG<br>TTCCTCCTCA | TGGAAATTAC<br>GCTTGGGGAG<br>TATCTCTTTT | TATGGATTAC<br>GAGGTT-ACC<br>TGCT |
|------------|----------------------------------------|----------------------------------------|----------------------------------------|----------------------------------------|----------------------------------|

|            |                                        |                                        |                                        |                                        |                                  |
|------------|----------------------------------------|----------------------------------------|----------------------------------------|----------------------------------------|----------------------------------|
| SAV1_SE210 | ACTGGGGACA<br>TGCCTCTAGG<br>GAATTTCAAT | TTTATGTTTG<br>AAGGAAGTCT<br>AGG-TCTCTC | CTGGTTACTA<br>AGTGGAGGGG<br>TTCCTCCTCA | CGGAAATTAC<br>GCTTAGGGAG<br>TATCTCTTTT | TATGGATTAC<br>GAGGTTTACC<br>TGCT |
|------------|----------------------------------------|----------------------------------------|----------------------------------------|----------------------------------------|----------------------------------|

|            |            |            |            |            |            |
|------------|------------|------------|------------|------------|------------|
| ASIAN2_Ema | CGTTTCTCCG | GGTGCACATC | CAAGTCAAAT | AAGGTGGAAT | GCCTCAGCAT |
|------------|------------|------------|------------|------------|------------|

|            |             |            |            |            |            |
|------------|-------------|------------|------------|------------|------------|
|            | CCACTGGCCA  | CACCCTTCCC | ACTTGCCCCA | GGTGGGTGCC | AAGGGAGGCA |
| FOR_DS1535 | ACCCCAGAGA  | GCACACACAG | GACTATCCAC | GCCAGCACCG | CTG        |
|            | CGTTTCTCCG  | GGTGCACATC | CAAGTCAAAT | AAGGTGGAAT | GCCTCAGCAC |
|            | CCACTGACCA  | CACCCTTCCC | ACTTGCCCCA | GGTGGGTGCC | AAGGGAGGCA |
| MAM1_SP134 | ACCCCAGAGA  | GCACACACAG | GACTATCCAC | GCCAGCACCG | CTG        |
|            | CGTTTCTCCG  | GGTGCACATC | CAAGTCAAAT | AAGGTGGAAT | GCCTCAGCAC |
|            | CCACTGGCCA  | CACCCTTCCC | ACTTGCCCCA | GGTGGGTGCC | AAGGGAGGCA |
| MAST_B014_ | ACCCCAGAGA  | GCACACACAG | GACTATCCAC | GCCAGCACCG | CTG        |
|            | TGTTTCTTTCG | GGTGCACATC | CAAGTCAAAT | AAGGTGGAAT | GCCTCAGCAC |
|            | CCACTGGCCA  | CACCCTTCCC | ACTTGCCCCA | AGTGGGTGCC | AAGGGAGGCA |
| SAV1_SE210 | ACCCCAGAGA  | GCACACACAG | GACTATCCAC | GCCAGCACCG | CTG        |
|            | CGTTTCTCCG  | GGTGCACATC | CAAGTCAAAT | AAGGTGGAAT | GCCTCAGCAC |
|            | CCACTGGCCA  | CACCCTTCCC | ACTTGCCCCA | GGTGGGTGCC | AAGGGAGGCA |
|            | ACCCCAGAGA  | GCACACACAG | GACTATCCAC | GCCAGCACCG | CTG        |

1 1 1 1 1  
5 144

|            |             |            |            |            |            |
|------------|-------------|------------|------------|------------|------------|
| ASIAN2_Ema | GGTACCATGA  | CCTCTGAGGG | TCCTCCAGCC | TCAATCAGAC | CATTAAGTCT |
|            | GGTCTTTTTA  | C-CAGAATTT | GAGGTCTACC | ACCCACTGTT | CTCCTGCTCC |
| FOR_DS1535 | ATCAAGGATT  | CTCTGTAGTG | TTCCCAGTCA | TTGGTGGTAG | CTGG       |
|            | GGTACCATGA  | CCTCTGAGGG | TCCTCCAGCC | TCAATCAGAC | CATTAAGTCT |
|            | GGTCTTTTTA  | CCTAGAATTT | GAGGTCTACC | ACCCACTGTT | CTCCTGCTCC |
| MAM1_SP134 | ATCAAGGATT  | CTCTGTAGAG | TTCCCAGTCA | TTGGTGGTAG | CTGG       |
|            | GGTACCATGA  | CCTCTGAGGG | TCCTCCAGCC | TCAATCAGAC | CATTAAGTCT |
|            | GGTCTTTTTA  | C-CAGAATTT | GAGGTCTACC | ACCCACTGTT | CTCCTGCTCC |
| MAST_B017_ | ATCAAGGATT  | CTCTGTAGTG | TTCCCAGTCA | TTGGTGGTAG | CTGG       |
|            | GGTACCATGA  | ACTCTGAGGG | TCCTCCAGCC | TCAATCAGAC | CATTAAGTCT |
|            | GGTCTTTTT-A | C-TAGAATTT | GAGGTTTACC | ACCCACTGTT | CTCCTGCTTC |
| SAV1_SE210 | ATCAAGGATT  | CTCTGTAGTG | TTCCCAGTCA | TTGGTGGTAA | CTGA       |
|            | GGTACCATGA  | CCTCTGAGGG | TCCTCCAGCC | TCAATCAGAC | CATTAAGTCT |
|            | GGTCTTTTTA  | C-TAGAATTT | GAGGTCTACC | ACCCACTGTT | CTCCTGCTCC |
|            | ATCAAGGATT  | CTCTGTAGTG | TTCCCAGTCA | TTGGTGGTAG | CTGG       |

1 1 1 1 1  
5 139

|            |            |            |            |            |            |
|------------|------------|------------|------------|------------|------------|
| ASIAN2_Ema | TCCTGTTGTG | CAGTTAAGAA | A-CGGATTTT | -CATGAAAAA | AA-TAATTCC |
|            | TCTTATGTTG | GGTTGG-AAA | -TGGTTGACA | GTGGACTCCA | TCTCAGTGCA |
| FOR_DS1535 | TCCACGGAGC | -AGCACCTAG | TAGGAATGTT | GGAGAACAC  |            |
|            | TCCTGTTGTG | AAGTTAAGAA | A-CGGATTTT | -CATGAAAAA | AA-TAATTCC |
|            | TCTTATGTTG | GGTTGG-AAA | -TGGTTGACA | GTGGACTCCA | TCTCAGTGCA |
|            | TCCAYGGAGC | -AGCACCTAG | TAGGAATGTT | GGAGAACAC  |            |
| MAM1_SP134 | TCCTGTTGTG | CAGTTAAGAA | A-CGGATTTT | -CATGAAAAA | AA-TAATTCC |
|            | TCTTATGTTG | GGTTGG-AAA | -TGGTTGACA | GTGGACTCCA | TCTCAGTGCA |
|            | TCCACGGAGC | -AGCACCTAG | TAGGAATGTT | GGAGAACAC  |            |
| MAST_B022_ | TCCTGTTGTG | AAGTTAAGAA | AATGGATTTT | TCATGAAAAA | AAATAATTCC |
|            | TCTTATGTTG | GGTTGGGAAA | ATGGTTGACA | GTGGACTCCA | TCTCAGTGCA |
|            | TCCACAGAGC | GAGCACCTAG | TAGGAATGTT | GGAGAACAC  |            |
| SAV1_SE210 | TCCTGTTGTG | AAGTTAAGAA | A-CGGATTTT | -CATGAAAAA | AA-TAATTCC |
|            | TCTTATGTTG | GGTTGG-AAA | -TGGTTGACA | GTGGACTCCA | TCTCAGTGCA |
|            | TCCACGGAGC | -AGCACCTAG | TAGGAATGTT | GGAGAACAC  |            |

1 1 1 1 1  
5 139

|            |            |            |             |            |            |
|------------|------------|------------|-------------|------------|------------|
| ASIAN2_Ema | TCCTGTTGGG | TTATT-CTGC | TGACAGCTAC  | CTTTTGGTRT | GGGGACCCAG |
|            | CCCATTTAGG | GCTCTGGAGA | TTGTGTTGCA  | GAAGGGGTAT | AAACTTTTCT |
| FOR_DS1535 | GGACCCTGC- | ACCC-ACC-T | G-TGTTTGTG  | GTGGCCAGT  |            |
|            | TCCTGTTGGG | TTATT-CTGC | TGACAGCTAC  | CTTTTGGTGT | GGGGACCCAG |
|            | CCCATTTAGG | GCTCTGGAGA | TTGTGTTGCA  | GAAGGRGTAT | AAACTTTTCT |
|            | GGACCCTGC- | ACCC-ACC-T | G-TGTTTGTG  | GTGGCCAGT  |            |
| MAM1_SP134 | TCCTGTTGGG | TTATT-CTGC | TGACAGCTAC  | CTTTTGGTGT | GGGGACCCAG |
|            | CCCATTTAGG | GCTCTGGAGA | TTGTGTTGCA  | GAAGGGGTAT | AAACTTTTCT |
|            | GGACCCTGC- | ACCC-ACC-T | G-TGTTTGTG  | GTGGCCAGT  |            |
| MAST_B023_ | TTTTGTTGGG | TTATTTCTGC | TAACAACCTAC | CTTTTAGTGT | GGGGACCCAG |
|            | CCCATTTAGG | GCTCTANAAA | TTGTGTTGCA  | GAAGGTGTAT | AAACTNCCCT |
|            | GGACCCTGCC | ACCCACCCT  | GGTGTGTTGTG | GTGGCCAGT  |            |
| SAV1_SE210 | TCCTGTTGGG | TTATT-CTGC | TGACAGCTAC  | CTTTTGGTGT | GGGGACCCAG |
|            | CCCATTTAGG | GCTCTGGAGA | TTGTGTTGCA  | GAAGGGGTAT | AAACTTTTCT |
|            | GGACCCTGC- | ACCC-ACC-T | G-TGTTTGTG  | GTGGCCAGT  |            |

1 1 1 1 1  
5 136

|            |                                         |                                        |                                        |                                    |                          |
|------------|-----------------------------------------|----------------------------------------|----------------------------------------|------------------------------------|--------------------------|
| ASIAN2_Ema | CCTGCGCTGG<br>AGTGTTTAAAC<br>ACTGATAACT | CGTCCAGGCT<br>CTCTCTGTGC<br>GTGTCATTGT | CTCCCGTTTA<br>CTCGGTTTCC<br>GAGCATTGG  | TCAGCTTCTA<br>TCACTGA-TA<br>AACTGT | AAGCCTGGGA<br>AACA-TGGGA |
| FOR_DS1535 | CCTGCGCTGG<br>AGYGCTTAAAC<br>ACTGATAACT | CATCCAGGCT<br>CTCTCTGTGC<br>GTGTCATTGT | CTCCCATTTA<br>CTCGGTTTCC<br>GAGCAYTTGG | TCAGCTTCTA<br>TCACTGA-TA<br>AACCGT | AAGCCTGGGA<br>AACA-TGGGA |
| MAM1_SP134 | CCTGCGCTGG<br>AGTGCTTAAAC<br>ACTGATAACT | CGTCCAGGCT<br>CTCTCTGTGC<br>GTGTCATTGT | CTCCCATTTA<br>CTCGGTTTCC<br>GAGCATTGG  | TCAGCTTCTA<br>TCACTGA-TA<br>AACCGT | AAGCCTGGGA<br>AACA-TGGGA |
| MAST_B025_ | CCTGCCCTGG<br>AGTGCTTAAAC<br>ACTGATAACT | CGTCCAGGCT<br>CTCTCTGTGC<br>GTGTCATTGT | CTCCCATTTA<br>CTCGGTTTCC<br>GAGCATTGG  | TCAGCTTCTA<br>TCACTGAATA<br>AACAAT | AAGCCTGGGA<br>AACAGTGGGA |
| SAV1_SE210 | CCTGTGCTGG<br>AGTGCTTAAAC<br>ACTGATAACT | CGTCCAGGCT<br>CTCTCTGTGC<br>GTGTCATTGT | CTCCCATTTA<br>CTCGGTTTCC<br>GAGCATTGG  | TCAGCTTCTA<br>TCACTGA-TA<br>AACCGT | AAGCCTGGGA<br>AACA-TGGGA |

1 1 1 1 1  
5 135

|            |                                        |                                        |                                        |                                   |                          |
|------------|----------------------------------------|----------------------------------------|----------------------------------------|-----------------------------------|--------------------------|
| ASIAN2_Ema | TCCCTGCAGG<br>CCGGCTCCCT<br>CGGTCTCGGC | GGCAGGAGAG<br>CTAGTCACCA<br>TTTAGCTTCT | TGGCAGAGTT<br>GAGACTAATA<br>GTGATGTTGC | TGGCTCACCT<br>GGAACCATGC<br>CTGTG | CCCTCCTGGC<br>CAGCCCCAGC |
| FOR_DS1535 | TCCCTGCAGG<br>CCGGCTCCCT<br>CGGTCTCGGC | GGCAGGAGAG<br>CTAGTCACCA<br>TTTAGCTTCT | TGGCAGAGTT<br>GAGACTAATA<br>GTGATGTTGC | TGGCTCACCT<br>GGAACCATGC<br>CTGTG | CCCTCCTGGC<br>CAGCCCCAGC |
| MAM1_SP134 | TCCCTGCAGG<br>CCGGCTCCCT<br>CAGTCTCAGC | GGCAGGAGAG<br>CTAGTCACCA<br>TTTAGCTTCT | TGGCAGAGTT<br>GCGACTAATA<br>GTGATGTTGC | TGGCTCACCT<br>GGAACCATGC<br>CTGTG | CCCTCCTGGC<br>CAGCCCCAGC |
| MAST_B029_ | TCCCTGCAGG<br>TCGGCTCCCT<br>CGGTCTCAGC | GGCAGGAGAG<br>CTAGTCACCA<br>TTTAGCTTCT | TGGCAGAATT<br>GAGATTAATA<br>GTGATGTTGC | TGGTTACCT<br>GGAACCATGT<br>CTGTA  | CCCTCCTGGC<br>CAGCCCCAGC |
| SAV1_SE210 | TCCCTGCAGG<br>CCGGCTCCCT<br>CGGTCTCAGC | GGCAGGAGAG<br>CTAGTCACCA<br>TTTAGCTTCT | TGGCAGAGTT<br>GAGACTAATA<br>GTGATGTTGC | TGGCTCACCT<br>GGAACCATGC<br>CTGTG | CCCTCCTGGC<br>CAGCCCCAGC |

1 1 1 1 1  
5 136

|            |                                        |                                        |                                        |                                    |                          |
|------------|----------------------------------------|----------------------------------------|----------------------------------------|------------------------------------|--------------------------|
| ASIAN2_Ema | CTTAATCTTC<br>TTTGAGCTGG<br>CCCATTTTGG | TTTAGGCCTG<br>GGCTGGAGTT<br>GGTCCCC-TT | GGCACAACAC<br>CAGACTGAGG<br>CAAGGGCCCT | AGTCAGTGCG<br>TGGGGAGTTG<br>CAGGAC | CAGGGAGGGA<br>TGGAACTTGC |
| FOR_DS1535 | CTTAATCTTC<br>TTTGAGCTGG<br>CCCATTTTGG | TTTAGGCCTG<br>GGCTGGAGTT<br>GGTCCCCCTT | GGCACAACAC<br>CAGACTGAGG<br>CAAGGGCCCT | AGTCAGTGCG<br>TGGGGAGTTG<br>CAGGAC | CAGGGAGGGA<br>TGGAACTTGC |
| MAM1_SP134 | CTTAATCTTC<br>TTTGAGCTGG<br>CCCATTTTGG | TTTAGGCCTG<br>GGCTGGAGTT<br>GGTCCCC-TT | GGCACAACAC<br>CAGACTGAGG<br>CAAGGGCCCT | AGTCAGTGCG<br>TGGGGAGTTG<br>CAGGAC | CAGGGAGGGA<br>TGGAACTTGC |
| MAST_B082_ | CTTAATCTTC<br>TTTGAGCTGG<br>CCCATTTTGG | TTTAGGCCTG<br>GGCTGGAGTT<br>G-TCCCC-TT | GGCACAACAC<br>CAGACTGAGG<br>CAAGGGTCTT | AGTCAGTGCG<br>TGGGGAGTTG<br>CAG-AT | CAGGGAGGGA<br>TGGAACTTGC |
| SAV1_SE210 | CTTAATCTTC<br>TTTGAGCTGG<br>CCCATTTTGG | TTTAGGCCTG<br>GGCTGGAGTT<br>GGTCCCCCTT | GGCACAACAC<br>CAGACTGAGG<br>CAAGGGCCCT | AGTCAGTGCG<br>TGGGGAGTTG<br>CAGGAC | CAGGGAGGGA<br>TGGAACTTGC |

1 1 1 1 1  
5 132

|            |                                        |                                        |                                        |                                |                          |
|------------|----------------------------------------|----------------------------------------|----------------------------------------|--------------------------------|--------------------------|
| ASIAN2_Ema | CCCATGAGCC<br>GAAAA-CCAG<br>TGACCCAGAG | CCCAGCCATC<br>TCTGAATTCA<br>ACTACAAATG | TCTTGAGATG<br>GCATTTATGA<br>TTTTTCTTAA | CTTCCTCCCA<br>GAACAAAAGA<br>GC | GACCATTGGG<br>GAAGCAGTTG |
| FOR_DS1535 | CCCATGAGCC<br>GAAAAGCCAG<br>TGACCCAGAG | CCCAGCCATC<br>TCTGAATTCA<br>ACTACAAATG | TCTTGAGATG<br>GCATTTATGA<br>TTTTTCTTAA | CTTCCTCCCA<br>GAACAAAAGA<br>GC | GACCATTGGG<br>GAAGCAGTTG |
| MAM1_SP134 | CCCATGAGCC<br>GAAAAGCCAG<br>TGACCCAGAG | CCCAGCCATC<br>TCTGAATTCA<br>ACTACAAATG | TCTTGAGATG<br>GCATTTATGA<br>TTTT-CTTAA | CTTCCTCCCA<br>GAACAAAAGA<br>GC | GACCATTGGG<br>GAAGCAGTTG |
| MAST_B033_ | CCCATGAGCC<br>GAAAA-CCAG<br>TGACCCAGAG | CCCAGCCATC<br>TCTGAATTCA<br>ACTACAAATG | TCTTGAGATG<br>GCATTTATGA<br>TTTT-CTTAA | CTTCCTCCCA<br>GAACAAAAGA<br>GC | GACCATTGGG<br>GAAGCAGTTG |

|            |                                                                    |                                                                    |                                                                    |                                                    |                                        |
|------------|--------------------------------------------------------------------|--------------------------------------------------------------------|--------------------------------------------------------------------|----------------------------------------------------|----------------------------------------|
| SAV1_SE210 | GAAAAGCCAG<br>TGACCCAAAG<br>CCCATGAGCC<br>GAAAAGCCAG<br>TGACCCAGAG | TCTGAATTCA<br>ACTACAAATG<br>CCCAGCCATC<br>TCTGAATTCA<br>ACTACAAATG | GCATTTATGA<br>TTTTTCTTAA<br>TCTTGAGATG<br>GCATTTATGA<br>TTTTTCTTAA | GAACAAAAGA<br>AC<br>CTTCCTCCCA<br>GAACAAAAGA<br>GC | GAAGCAGTTG<br>GACCATTGGG<br>GAAGCAGTTG |
|------------|--------------------------------------------------------------------|--------------------------------------------------------------------|--------------------------------------------------------------------|----------------------------------------------------|----------------------------------------|

1 1 1 1 1  
5 131

|            |                                        |                                        |                                        |                               |                          |
|------------|----------------------------------------|----------------------------------------|----------------------------------------|-------------------------------|--------------------------|
| ASIAN2_Ema | TTGA--CCTG<br>GAACTTGCAT<br>CTCTGGGGGT | CCTGGGGGAT<br>CACCTATGTC<br>GCCTTTTACA | CTGCCCCAC-<br>AATGTGCCAG<br>AGTGTAGGAG | ACCCTTCCCC<br>ACAGCCAGGA<br>C | TGAGTCTTTG<br>GGTCCAAGGC |
| FOR_DS1535 | TTGA--CCTG<br>GAACTTGCAT<br>CTCTGGGGGT | CCTGGGGGAT<br>CACCTATGTC<br>GCCTTTTACA | CTGCCCCAC-<br>AATGTGCCAG<br>AGTGTAGGAG | ACCCTTCCCC<br>ACAGCCAGGA<br>C | TGAGTCTTTG<br>GGTCCAAGGC |
| MAM1_SP134 | TTGA--CCTG<br>GAACTTGCAT<br>CTCTGGGGGT | CCTGGGGGAT<br>CACCTATGTC<br>GCCTTTTACA | CTGCCCCAC-<br>AATGTGCCAG<br>AGTGTAGGAG | ACCCTTCCCC<br>ACAGCCAGGA<br>C | TGAGTCTTTG<br>GGTCCAAGGC |
| MAST_B035_ | TTCAAACTG<br>GAACTTGCAT<br>CTCTAGGAAT  | CCTGGGGGAT<br>CACCTATGTC<br>GCCTTTTACG | CTGCCCCACC<br>AATGTGCCAG<br>AGTGTAGGAG | ACCCTTCACC<br>ACAGCCAGGA<br>C | TGGGTCTTTG<br>GGTCCAAGGC |
| SAV1_SE210 | TTGA--CCTG<br>GAACTTGCAT<br>CTCTGGGGGT | CCTGGGGGAT<br>CACCTATGTC<br>GCCTTTTACA | CTGCCCCAC-<br>AATGTGCCAG<br>AGTGTAGGAG | ACCCTTCCCC<br>ACAGCCAGGA<br>C | TGAGTCTTTG<br>GGTCCAAGGC |

1 1 1 1 1  
5 132

|            |                                        |                                        |                                        |                                |                          |
|------------|----------------------------------------|----------------------------------------|----------------------------------------|--------------------------------|--------------------------|
| ASIAN2_Ema | TGGTTAAGTG<br>CAAAGGCCAG<br>ACACCGTTTA | GCTTGTCTGA<br>GGCTATGTGA<br>GCCCCAGCCA | GGATACTCAG<br>GTCCACGCCC<br>AGCTTTCTCT | CTAGGTGAAG<br>AACCCCAACA<br>CT | CCAAGAAGGT<br>TCACCCCAAA |
| FOR_DS1535 | TGGTTAAGTG<br>CAAAGGCCAG<br>ACACCGTTTA | GCTTGTCTGA<br>GGCTATGTGA<br>GCCCCAGCCA | GGATACTCAG<br>GTCCACGCCC<br>AGCTTTCTCT | CTAGGTGAAG<br>AACCCCAACA<br>CT | CCAAGAAGGT<br>TCACCCCAAA |
| MAM1_SP134 | TGGTTAAGTG<br>CAAAGGCCAG<br>ACACCGTTTA | GCTTGTCTGA<br>GGCTATGTGA<br>GCCCCAGCCA | GGATACTCAG<br>GTCCACGCCC<br>AGCTTTCTCT | CTAGGTGAAG<br>AACCCCAACA<br>CT | CCAAGAAGGT<br>TCACCCCAAA |
| MAST_B036_ | TGGTTAAGTG<br>CAAAGGCCAG<br>ACACCGTTTA | GCTTGTCTGA<br>GGCTATGTGA<br>GCCCCAGCCA | GGATACTCAG<br>GTCCATGTCC<br>AGCTTTCTCT | CTAGGTGAAG<br>AACTCCAACA<br>CT | CCAAGAAGGT<br>TCACCC-AA  |
| SAV1_SE210 | TGGTTAAGTG<br>CAAAGGCCAG<br>ACACCGTTTA | GCTTGTCTGA<br>GGCTATGTGA<br>GCCCCAGCCA | GGATACTCAG<br>GTCCACGCCC<br>AGCTTTCTCT | CTAGGTGAAG<br>AACCCCAACA<br>CT | CCAAGAAGGT<br>TCAGCCCAAA |

1 1 1 1 1  
5 132

|            |                                        |                                        |                                        |                                |                          |
|------------|----------------------------------------|----------------------------------------|----------------------------------------|--------------------------------|--------------------------|
| ASIAN2_Ema | TTGGAAAGAG<br>GGCAGAGACA<br>AAAGGAGGGA | TATCTTAAGC<br>GAGAGAAAGA<br>GGGAGTGGAA | ACAAAGGGTT<br>GAGAGGGAGA<br>AAGGGAAAAA | CTTGATAAAC<br>GAAGAAAGAA<br>GG | ATTGAATAAT<br>AGGAAGGAGG |
| FOR_DS1535 | TTGGAAAGAG<br>GGCAGAGACA<br>AAAGGAGGGA | TATCTTAAGC<br>GAGAGAAAGA<br>GGGAGTGGAA | ACAAAGGGTT<br>GAGAGGGAGA<br>AAGGGAAAAA | CTTGATAAAC<br>GAAGAAAGAA<br>GG | ATTGAATAAT<br>AGGAAGGAGG |
| MAM1_SP134 | TTGGAAAGAG<br>GGCAGAGACA<br>AAAGGAGGGA | TATCTTAAGC<br>GAGAGAAAGA<br>GGGAGTGGAA | ACAAAGGGTT<br>GAGAGGGAGA<br>AAGGGAAAAA | CTTGATAAAC<br>GAAGAAAGAA<br>GG | ATTGAATAAT<br>AGGAAGGAGG |
| MAST_B083_ | TTGGAAAGAG<br>GGCAGAGACA<br>AAAAGAGGGA | TATCTTAAGC<br>NAGAGAAAGA<br>GGGAGTGGAA | ACAAAGGGTT<br>GAGAGGGAGA<br>AAGGGAAAAA | -TTGATAAAC<br>GAAGAAAGAA<br>GG | ATTGAATAAT<br>AGGAAGGAGG |
| SAV1_SE210 | TTGGAAAGAG<br>GGCAGAGACA<br>AAAGGAGGGA | TATCTTAAGC<br>GAGAGAAAGA<br>GGGAGTGGAA | ACAAAGGGTT<br>GAGAGGGAGA<br>AAGGGAAAAA | CTTGATAAAC<br>GAAGAAAGAA<br>GG | ATTGAATAAT<br>AGGAAGGAGG |

1 1 1 1 1  
5 130

|            |                                       |                                        |                                        |                          |                          |
|------------|---------------------------------------|----------------------------------------|----------------------------------------|--------------------------|--------------------------|
| ASIAN2_Ema | GAGCCGCTG<br>GCCGTGGGAA<br>G-C-AGCTGG | CTCGAGGAGA<br>GACCTCTGCC<br>AGGAGGA-GA | A-GGAA-TCT<br>-ACCC-AGAG<br>GC-AAGGTGG | -C-TGATT-A<br>CCTAGAGGAG | GCCAGC-TGA<br>CTAC-GG-AG |
| FOR_DS1535 | GAGCCGCTG<br>GCCGTGGGAA               | CTCGAGGAGA<br>GACCTCTGCC               | A-GGAA-TCT<br>-ACCC-AGAG               | -C-TGATT-A<br>CCTAGAGGAG | GCCAGC-TGA<br>CTAC-GG-AG |

|            |                                       |                                        |                                        |                          |                          |
|------------|---------------------------------------|----------------------------------------|----------------------------------------|--------------------------|--------------------------|
| MAM1_SP134 | G-C-AGCTGG<br>GAGCCGCTG<br>GCCGTGGGAA | AGGAGGA-GA<br>CTCGAGGAGA<br>GACCTCTGCC | GC-AAGGTGG<br>A-GGAA-TCT<br>-ACCC-AGAG | -C-TGATT-A<br>CCTAGAGGAG | GCCAGC-TGA<br>CTAC-GG-AG |
| MAST_B084_ | G-C-AGCTGG<br>GAGCCGCTG<br>GCCATGGGAA | AGGAGGA-GA<br>CTCGAGGAGA<br>GACCTCTGCC | GC-AAGGTGG<br>AAGGAACTCT<br>CACCCCAGAG | TCCTGATTTA<br>CCTAGAGGAG | GCCAGCCTGA<br>CTACCGGGAG |
| SAV1_SE210 | GGCGAGCTGG<br>GAGCCGCTG<br>GCCGTGGGAA | AGGAGGAAGA<br>CTCGAGGAGA<br>GACCTCTGCC | GCCAAGGTGA<br>A-GGAA-TCT<br>-ACCC-AGAG | -C-TGATT-A<br>CCTAGAGGAG | GCCAGC-TGA<br>CTAC-GG-AG |
|            | G-C-AGCTGG                            | AGGAGGA-GA                             | GC-AAGGTGG                             |                          |                          |

1 1 1 1 1  
5 132

|            |                                         |                                        |                                        |                                |                          |
|------------|-----------------------------------------|----------------------------------------|----------------------------------------|--------------------------------|--------------------------|
| ASIAN2_Ema | GAGTGTGGG<br>GCAGATGGGA<br>GCCATTTTCAG  | GAAAGGGATT<br>CTAGGTTGTT<br>GCTCTTCTCC | ACCAGGGAGC<br>GCCTGGGCAA<br>GAAGATGGCA | ATCGGCATGC<br>TACCACACAG<br>AT | TCACTGGGAG<br>CAGCCTGCAT |
| FOR_DS1535 | GAGTGTGGG<br>GCAGATGGGA<br>GCCATTTTCAG  | GAAAGGGATT<br>CTAGGTTGTT<br>GCTCTTCTCC | ACCAGGGAGC<br>GCCTGGGCAA<br>GAAGATGGCA | ATCGGCATGC<br>TACCACACAG<br>AC | TCACTGGGAG<br>CAGCCTGCAT |
| MAM1_SP134 | GAGTGTGGRG<br>GCAGATGGGA<br>GCCATTTTCAG | GAAAGGGATT<br>CTAGGTTGTT<br>GCTCTTCTCC | ACCAGGGAGC<br>GCCTGGGCAA<br>GAAGATGGCA | ATCGGCATGC<br>TACCACACAG<br>AT | TCACTGGGAG<br>CAGCCTGCAT |
| MAST_B037_ | GAGTGTGGG<br>GCAGATGGGA<br>GCCATTTTCAG  | -AAAGGGATT<br>CTAGGTTGTT<br>GCTCTTCTCC | ACCAGG-AGC<br>GCCTGGGCAA<br>GAAGATGGCA | ATCGGCATGC<br>TACCACACAG<br>AC | TCACTGGGAG<br>CAGCCTGCAT |
| SAV1_SE210 | GAGTGTGGG<br>GCAGATGGGA<br>GCCATTTTCAG  | GAAAGGGATT<br>CTAGGTTGTT<br>GCTCTTCTCC | ACCAGGGAGC<br>GCCTGGGCAA<br>GAAGATGGCA | ATCGGCATGC<br>TACCACACAG<br>AC | TCACTGGGAG<br>CAGCCTGCAT |

1 1 1 1 1  
5 130

|            |                                        |                                        |                                        |                          |                          |
|------------|----------------------------------------|----------------------------------------|----------------------------------------|--------------------------|--------------------------|
| ASIAN2_Ema | CCCGCCAGAG<br>GCCTGGCAGG<br>AGGCCCAGGC | TCCAGCTCTG<br>GCACTTGGCG<br>TGGGGGAGGG | CAGAGCTCCC<br>AACCTGCTGC<br>GACTCTGGAG | TAGTAACACC<br>ATCTCCACCG | TGGGCTCCCA<br>TGAATACCAC |
| FOR_DS1535 | CCCGCCAGAG<br>GCCTGGCAGG<br>AGGCCCAGGC | TCCAGCTCTG<br>GCACTTGGCG<br>TGGGGGAGGG | CAGAGCTCCC<br>AACCTGCTGC<br>GACTCTGGAG | TAGTAACACC<br>GTCTCCACCG | TGGGCTCCCA<br>TGAATACCAC |
| MAM1_SP134 | CCCGCCAGAG<br>GCCTGGCAGG<br>AGGCCCAGGC | TCCAGCTCTG<br>GCACTTGGCG<br>TGGGGGAGGG | CAGAGCTCCC<br>AACCTGCTGC<br>GACTCTGGAG | TAGTAACACC<br>ATCTCCACCG | TGGGCTCCCA<br>TGAATACCAC |
| MAST_B038_ | TCCGCCAGAG<br>GCCTGGCAGG<br>AGGCCCAGGC | TCCAGCTCTG<br>GCACTTGGCG<br>TGGGGGAGGG | TAGAGCTCCC<br>AACCTGCTGC<br>GACTCTGAAA | TAGTAACACT<br>GTCTCCACCG | TGGGCTCCCA<br>TGAATACCAC |
| SAV1_SE210 | CCCGCCAGAG<br>GCCTGGCAGG<br>AGGCCCAGGC | TCCAGCTCTG<br>GCACTTGGCG<br>TGGGGGAGGG | CAGAGCTCCC<br>AACCTGCTGC<br>GACTCTGGAG | TAGTAACACC<br>GTCTCCACCG | TGGGCTCCCA<br>TGAATACCAC |

1 1 1 1 1  
5 129

|            |                                        |                                       |                                       |                          |                          |
|------------|----------------------------------------|---------------------------------------|---------------------------------------|--------------------------|--------------------------|
| ASIAN2_Ema | CCAAAGTCAG<br>GGCTAGTCTT<br>TGTTGCCTGA | AACTCAAAAA<br>TCAGTGCCG<br>GGCCGTCAAT | GGGCAGCCCA<br>CCACCTTCCA<br>GAATTCTTA | CCGCTCACAG<br>ACCATCTCCA | CAGCCTGCCA<br>GCCATTGCCC |
| FOR_DS1535 | CCAAAGTCAG<br>GGCTAGTCTT<br>TGTTGCCTGA | AACTCAAAAA<br>TCAGTGCTG<br>GGCCGTCAAT | GGGCAGCCCA<br>CCACCTTCCA<br>GAATTTTTA | CCGCTCACAG<br>ACCATCTCCA | CAGCCTGCCA<br>GCCATTGCCC |
| MAM1_SP134 | CCAAAGTCAG<br>GGCTAGTCTT<br>TGTTGCCTGA | AACTCAAAAA<br>TCAGTGCCG<br>GGCCGTCAAT | GGGCAGCCCA<br>CCACCTTCCA<br>GAATTCTTA | CCGCTCACAG<br>ACCATCTCCA | CAGCCTGCCA<br>GCCATTGCCC |
| MAST_B040_ | TCAAAGTCAG<br>GGCTAGTCTT<br>TGTTGCCTGA | AACTCAAAAA<br>TCAGTGCTG<br>GGCCGTCAAT | GGGCAGCCCA<br>CCACCTTCCA<br>GAATTCTTA | CTGCTCACAG<br>ACCATCTCCA | CAGCCTGCCA<br>GCCATTGCCC |
| SAV1_SE210 | CCAAAGTCAG<br>GGCTAGTCTT<br>TGTTGCCTGA | AACTCAAAAA<br>TCAGTGCTG<br>GGCCGTCAAT | GGGCAGCCCA<br>CCACCTTCCA<br>GAATTTTTA | CCGCTCACAG<br>ACCATCTCCA | CAGCCTGCCA<br>GCCATTGCCC |

1 1 1 1 1  
5 130

|            |                                        |                                        |                                        |                          |                          |
|------------|----------------------------------------|----------------------------------------|----------------------------------------|--------------------------|--------------------------|
| ASIAN2_Ema | TCTCCCGAAC<br>AATGAGCACT<br>CTGGAGACTT | GCCTTGGTTC<br>ACAAAAGAAT<br>CCTCTAGATT | CAGGAACCAA<br>CAGAGCTGCT<br>AGACAACCTG | GGAAATCCTG<br>TGCAGGATGA | TCACGAAGTG<br>GCTCTGCCTC |
| FOR_DS1535 | TCTCCCGAAC<br>AATGAGCACT<br>CTGGAGACTT | GCCTTGGTTC<br>ACAAAAGAAT<br>CCTCCAGATT | CAGGAACCAA<br>CAGAGCTGCT<br>AGACAACCTG | GGAAATCCTG<br>TGCAGGATGA | TCACGAAGTG<br>GCTCTGCCTC |
| MAM1_SP134 | TCTCCCGAAC<br>AATGAGCACT<br>CTGGAGACTT | GCCTTGGTTC<br>ACAAAAGAAT<br>CCTCCAGATT | CAGGAACCAA<br>CAGAGCTGCT<br>AGACAACCTG | GGAAATCCTG<br>TGCAGGATGA | TCACGAAGTG<br>GCTCTGCCTC |
| MAST_B041_ | TCTCCGGAAC<br>AATGAGCACT<br>CTGGAGACTT | ACCTTGGTTC<br>ACAAA-GAAT<br>CCTCCAGATT | CAGGAACCAA<br>CAGAGCTGCT<br>AGACAACCTG | GGAAATCCTG<br>TGCAGGATGA | TCACGAAGTG<br>GCTCTGCCTC |
| SAV1_SE210 | TCTCCCGAAC<br>AATGAGCACT<br>CTGGAGACTT | GCCTTGGTTC<br>ACGAAAGAAT<br>CCTCCAGATT | CAGGAACCAA<br>CAGAGCTGCT<br>AGACAACCTG | GGAAATCCTG<br>TGCAGGATGA | TCACGAAGTG<br>GCTCTGCCTC |

1 1 1 1 1  
5 128

|            |                                        |                                        |                                      |                          |                          |
|------------|----------------------------------------|----------------------------------------|--------------------------------------|--------------------------|--------------------------|
| ASIAN2_Ema | CCATGAAGTT<br>ATCAATGTCA<br>GCTTCCTGGC | AC-CTGCAGA<br>TCCTCTTAAA<br>CTTGCTCTTT | GCTTTGGCTG<br>CAACAACAAA<br>ACTTCCGC | TCCAGAGATT<br>AAAGCAGTGG | TCAGTCTTCC<br>CCCCAATGAG |
| FOR_DS1535 | CCATGAAGTT<br>ATCAATGTCA<br>GCTTCCTGGC | AC-CTGCAGA<br>TCCTCTTAAA<br>CTTGCTCTTT | GCTTTGGCTG<br>CAACAACAAA<br>ACTTCCGC | TCCAGAGATT<br>AAAGCAGTGR | TCAGTCTTCC<br>CCCCAATGAG |
| MAM1_SP134 | CCATGAAGTT<br>ATCAATGTCA<br>GCTTCCTGGC | AC-CTGCAGA<br>TCCTCTTAAA<br>CTTGCTCTTT | GCTTTGGCTG<br>CAACAACAAA<br>ACTTCCGC | TCCAGAGATT<br>AAAGCAGTGG | TCAGTCTTCC<br>CCCCAATGAG |
| MAST_B086_ | TCATGAAGTT<br>ATCAATGTCA<br>GCTTCCTGGC | ATTCTGCAGA<br>TCCTCTTAAA<br>CTTGCTCTTT | GCTTTGGCTA<br>CAACAACAAA<br>ACTTCTGC | TCCAGAGATT<br>AAAGCAGTGG | TCAGTCTTCC<br>CCC-AATGAG |
| SAV1_SE210 | CCATGAAGTT<br>ATCAATGTCA<br>GCTTCCTGGC | AC-CTGCAGA<br>TCCTCTCAA<br>CTTGCTCTTT  | GCTTTGGCTG<br>CAACAACAAA<br>ACTTCCGC | TCCAGAGATT<br>AAAGCAGTGG | TCAGTCTTCC<br>CCCCAATGAG |

1 1 1 1 1  
5 127

|            |                                        |                                        |                                     |                          |                          |
|------------|----------------------------------------|----------------------------------------|-------------------------------------|--------------------------|--------------------------|
| ASIAN2_Ema | ATTTAGTCTG<br>GGCAATTAAC<br>ATAATA-TAA | CCTGTTAC-A<br>AACAATGGTT<br>AATTTAACCC | CAGAAGATTG<br>TACTTAAAAA<br>AATTATT | TTATGAGTCG<br>AATATAGCAA | GAGATTCGAT<br>ATTCTCAGTC |
| FOR_DS1535 | ATTTAGTCTG<br>GGCAATTAAC<br>ATAATA-TAA | CCTGTTAC-A<br>AACAAYGGTT<br>AATTTAACCC | CAGAAGATTG<br>TACTTAAAAA<br>AATTATT | TTATGAGTCG<br>AATATAGCAA | GAGATTCGAT<br>ATTCTCAGTC |
| MAM1_SP134 | ATTTAGTCTG<br>GGCAATTAAC<br>ATAATA-TAA | CCTGTTAC-A<br>AACAATGGTT<br>AATTTAACCC | CAGAAGATTG<br>TACTTAAAAA<br>AATTATT | TTATGAGTCG<br>AATATAGCAA | GAGATTCGAT<br>ATTCTCAGTC |
| MAST_B048_ | ATTTAGTCTG<br>GGCAATTAAC<br>ATAATAATAA | CCTGTTACCA<br>AACAATGGTT<br>AATTTAACCC | CAGAAGATTG<br>TACTTAAAAA<br>AATTATT | TTATGAGTCG<br>A-TATAGCAA | GAGATTCGAT<br>ATTCTCAGTC |
| SAV1_SE210 | ATTTAGTCTG<br>GGCAATTAAC<br>ATAATA-TAA | CCTGTTAC-A<br>AACAACGGTT<br>AATTTAACCC | CAGAAGATTG<br>TACTTAAAAA<br>AATTATT | TTATGAGTCG<br>AATATAGCAA | GAGATTCGAT<br>ATTCTCAGTC |

1 1 1 1 1  
5 126

|            |                                       |                                        |                                    |                          |                          |
|------------|---------------------------------------|----------------------------------------|------------------------------------|--------------------------|--------------------------|
| ASIAN2_Ema | CATTAGATTC<br>CACTGTAATG<br>CTCTCCCAT | ATTCTTTAGC<br>TGGAGTGAGA<br>CTTTGTGTTG | AAAAATCATC<br>GCTTATCCTA<br>TTGGAA | AAGGGAATCA<br>ATTTGTTTGG | GACCAGCCTT<br>CACCTCTTAA |
| FOR_DS1535 | CATTAGATTC<br>CACTGTAATG<br>CTCTCCCAT | ATTCTTTAGC<br>TGGAGAGAGA<br>CTTTGTGTTG | AAAAATCATC<br>GCTTATCCTA<br>TTGGAA | AAGGGAATCA<br>ATTTGTTTGG | GACCAGCCTT<br>CACCTCTTAA |
| MAM1_SP134 | CATTAGATTC<br>CACTGTAATG<br>CTCTCCCAT | ATTCTTTAGC<br>TGGAGAGAGA<br>CTTTGTGTTG | AAAAATCATC<br>GCTTATCCTA<br>TTGGAA | AAGGGAATCA<br>ATTTGTTTGG | GACCAGCCTT<br>CACCTCTTAA |
| MAST_B088_ | TATTAGATTC<br>CACTGTAATG<br>CTCTCCCAT | ATTTTTTAGC<br>TGGAGAGAGA<br>ATTTGTGTTG | AAAAATCATC<br>GCTTATCCTA<br>TTGGAA | AAGGGAATCA<br>ATTTGTTTGG | GACCAGCCTT<br>CACCTCTTAA |
| SAV1_SE210 | CATTAGATTC<br>CACTGTAATG              | ATTCTTTAGC<br>TGGAGAGAGA               | AAAAATCATC<br>GCTTATCCTA           | AAGGGAATCA<br>ATTTGTTTGG | GACCAGCCTT<br>TACCTCTTAA |

CTCTCCATT CTTTGTGTTG TTGGAA

1 1 1 1 1  
5 125

|            |                                        |                                        |                                   |                                        |                                        |
|------------|----------------------------------------|----------------------------------------|-----------------------------------|----------------------------------------|----------------------------------------|
| ASIAN2_Ema | AGCGCTGTGT<br>GTTTAAAGAC<br>GACAGGCGAG | TCTCAACAGC<br>TGCCCATCTG<br>GCCTGGGAGC | TCATAAATCA<br>TTGGCTGGCG<br>CTTGC | CGCATCTCCT<br>CCCTCCTCTC<br>CCCTCCTCTC | TCAGAGGGGA<br>CCTTCCGGCG<br>CCTTCCGGCG |
| FOR_DS1535 | AGCGCTGTGT<br>GTTTAAAGAC<br>GACAGGCGAG | TCTCAACAGC<br>TGCCCATCTG<br>GCCTGGGAGC | TCATAAATCA<br>TTGGCTGGCG<br>CTTGC | CGCATCTCCT<br>CCCTCCTCTC<br>CCCTCCTCTC | TCAGACGGGA<br>CCTTCCGGCG<br>CCTTCCGGCG |
| MAM1_SP134 | AGCGCTGTGT<br>GTTTAAAGAC<br>GACAGGCGAG | TCTCAACAGC<br>TGCCCATCTG<br>GCCTGGGAGC | TCATAAATCA<br>TTGGCTGGCG<br>CTTGC | CGCATCTCCT<br>CCCTCCTCTC<br>CCCTCCTCTC | TCAGAGGGGA<br>CCTTCCGGCG<br>CCTTCCGGCG |
| MAST_B050_ | AGTGTGTGT<br>GTTTAAAGAC<br>GACAGGCGAG  | TTTCAACAGC<br>TGCCCGTCTG<br>GCCTGGGAGC | TCATAAATCA<br>CTGGCTGGCA<br>CTTTA | CGCATTTCTC<br>CCCTCCTCTC<br>CCCTCCTCTC | TCAGAGGGGA<br>CCTTCCGGCG<br>CCTTCCGGCG |
| SAV1_SE210 | AGCGCTGTGT<br>GTTTAAAGAC<br>GACAGGCGAG | TCTCAACAGC<br>TGCCCATCTG<br>GCCTGGGAGC | TCATAAATCA<br>TTGGCTGGCG<br>CTTGC | CGCATCTCCT<br>CCCTCCTCTC<br>CCCTCCTCTC | TCAGAGGGGA<br>CCTTCCGGCG<br>CCTTCCGGCG |

1 1 1 1 1  
5 124

|            |                                        |                                        |                                  |                                        |                                      |
|------------|----------------------------------------|----------------------------------------|----------------------------------|----------------------------------------|--------------------------------------|
| ASIAN2_Ema | GCTAATGAGC<br>GGTGCCTTGG<br>CAGAAGTGGG | TTGAAGTAAA<br>CCAAGTGCCT<br>TCTCCGAATG | AA-GAAA-TT<br>GCAGCCATGC<br>GTGC | TA-TCTCTGC<br>CAGGCAGAAG<br>CAGGCAGAAG | ATCTGCCACT<br>CCAGTTCTA<br>CCAGTTCTA |
| FOR_DS1535 | GCTAATGAGC<br>GGTGCCTTGG<br>CAGAAGTGGG | TTGAAGTAAA<br>CCAAGTGCCT<br>TCTCCGAATG | AA-GACA-TT<br>GCAGCCATGC<br>GTGC | TA-TCTCTGC<br>CAGGCAGAAG<br>CAGGCAGAAG | AGCTGCCACT<br>CCAGTTCTA<br>CCAGTTCTA |
| MAM1_SP134 | GCTAATGAGC<br>GGTGCCTTGG<br>CAGAAGTGGG | TTGAAGTAAA<br>CCAAGTGCCT<br>TCTCCGAATG | AA-GAAA-TT<br>GCAGCCATGC<br>GTGC | TA-TCTCTGC<br>CAGGCAGAAG<br>CAGGCAGAAG | ATCTGCCACT<br>CCAGTTCTA<br>CCAGTTCTA |
| MAST_B054_ | TTAAATGAGC<br>GGTGCCTTGG<br>CAGAAGTGGG | TTGAAGTAAA<br>CCAAGTGCCT<br>TCTCCGAATA | AAAGAAAATT<br>GCAGCCATGC<br>ATGC | TAATCTCTGC<br>CAGGCAGAAG<br>CAGGCAGAAG | AACTGCCACT<br>CCAGTTCTA<br>CCAGTTCTA |
| SAV1_SE210 | GCTAATGAGC<br>GGTGCCTTGG<br>CAGAAGTGGG | TTGAAGTAAA<br>CCAAGTGCCT<br>TCTCCAAATG | AA-GACA-TT<br>ACAGTCATGC<br>GTGC | TA-TCTCTGC<br>CAGGCAGAAG<br>CAGGCAGAAG | AGCTGCCACT<br>CCAGTTCTA<br>CCAGTTCTA |

1 1 1 1 1  
5 124

|            |                                        |                                        |                                  |                                        |                                        |
|------------|----------------------------------------|----------------------------------------|----------------------------------|----------------------------------------|----------------------------------------|
| ASIAN2_Ema | TTACCCTTAC<br>CCGAATCAAA<br>CGAAGAGCCA | AAGTCTGTGA<br>GAGGTAAAAT<br>GGATTCAATC | ATTAGACATG<br>GCCATCCTCA<br>CTAA | TTTATTCCGT<br>AGGTCACACA<br>AGGTCACACA | TTTACAGAGG<br>TCTATTAAGT<br>TCTATTAAGT |
| FOR_DS1535 | TTACCCTTAC<br>CCGAATCAAA<br>CGAAGAGCCA | AAGTCTGTGA<br>GAGGTAAAAT<br>GGATTCAATC | ATTAGACATG<br>GCCATCCTCA<br>CTAA | TTTATTCCCT<br>AGGTCACACA<br>AGGTCACACA | TTTACAGAGG<br>TCTATTAAGT<br>TCTATTAAGT |
| MAM1_SP134 | TTACCCTTAC<br>CCGGATCAAA<br>CGAAGAGCCA | AAGTCTGTGA<br>GAGGTAAAAT<br>GGATTCAATC | ATTAGACATG<br>GCCATCCTCA<br>CTAA | TTTATTCCCT<br>AGGTCACACA<br>AGGTCACACA | TTTACAGAGG<br>TCTATTAAGT<br>TCTATTAAGT |
| MAST_B056_ | TTACCGTTAC<br>CCAAATCAAA<br>CAAAGAGCCA | AAGTCTGTGA<br>GAGGTAAAAT<br>GGATTCAATC | ATTAGACATT<br>GCCATCCTCA<br>CTAA | TTTATTCCCT<br>AGGTTACACA<br>AGGTTACACA | TTTACAGAGG<br>TCTATTAAGT<br>TCTATTAAGT |
| SAV1_SE210 | TTACCCTTAC<br>CCGAATCAAA<br>CGAAGAGCCA | AAGTCTGTGA<br>GAGGTAAAAT<br>GGATTCAATC | ATTAGACATG<br>GCCATCCTCA<br>CTAA | TTTATTCCCT<br>AGGTCACACA<br>AGGTCACACA | TTTACAGAGG<br>TCTATTAAGT<br>TCTATTAAGT |

1 1 1 1 1  
5 124

|            |                                        |                                       |                                  |                                        |                                        |
|------------|----------------------------------------|---------------------------------------|----------------------------------|----------------------------------------|----------------------------------------|
| ASIAN2_Ema | TGAAGACACC<br>TAAAGATTAC<br>AGGATTGCTA | AGTGGCCCT<br>AGTCTAGGAA<br>A-GAGTCAGA | CGACAGAAAA<br>ACTCTATGGG<br>ATCA | GACCAGGTTA<br>GCAGTTCTAC<br>GCAGTTCTAC | TCTGCTCCGG<br>TCTGTCCTAT<br>TCTGTCCTAT |
| FOR_DS1535 | TGAAGACACC<br>TAAAGATTAC<br>AGAATTGCTA | AGTGGCCCT<br>AGTCTAGGAA<br>A-GAGTCAGA | CGACAGAAAA<br>ACTCTATGGG<br>ATCA | GACCAGGTTA<br>GCAGTTCTAC<br>GCAGTTCTAC | TCTGCTCCGG<br>TCTGTCCTAT<br>TCTGTCCTAT |
| MAM1_SP134 | TGAAGACACC<br>TAAAGATTAC<br>AGGATTGCTA | AGTGGCCCT<br>AGTCTAGGAA<br>A-GAGTCAGA | CGACAGAAAA<br>ACTCTATGGG<br>ATCA | GACCAGGTTA<br>GCAGTTCTAC<br>GCAGTTCTAC | TCTGCTCCGG<br>TCTGTCCTAT<br>TCTGTCCTAT |

|            |                                        |                                        |                                  |                          |                          |
|------------|----------------------------------------|----------------------------------------|----------------------------------|--------------------------|--------------------------|
| MAST_B057_ | TGAAGACACC<br>TAAAGATTAT<br>TGGGTT-CTA | AGTGGCCCCT<br>AGTCTAGGAA<br>ATGAGTCAGA | CGACAGAAAA<br>ACCCTATGGG<br>ATTG | GACCAGGTGA<br>GCAGTTCTAC | TCCGCTCCGG<br>TCCATCATAT |
| SAV1_SE210 | TGAAGACACC<br>TAAAGATTAC<br>AGGATTGCTA | AGTGGCCCCT<br>AGTCTAGGAA<br>A-GAGTCAGA | CGACAGAAAA<br>ACTCTATGGG<br>ATCA | GACCAGGTGA<br>GCAGTTCTAC | TCTGCTCCGG<br>TCTGTCCTAT |

1 1 1 1 1  
5 125

|            |                                        |                                        |                                   |                          |                          |
|------------|----------------------------------------|----------------------------------------|-----------------------------------|--------------------------|--------------------------|
| ASIAN2_Ema | CAGAGCTAAA<br>TCAGACTGCT<br>AGCCACCCAC | AGAGAGAGAA<br>AGCCTCCTAA<br>TTGTGGTATT | TG-TTTCCCC<br>ACTGTGAGAA<br>TCTGT | TAGAGGTGGC<br>AATAAATTTT | ACTCTGAA-T<br>TGCTTGTTAA |
| FOR_DS1535 | CAGAGCTAAA<br>TCAGACTTCT<br>AGCCACCCAC | AGAGASAGAA<br>AGCCTCCTAA<br>TTGTGGTATT | YR-TTTCCCC<br>ACTGTGAGAA<br>TCTGT | TAGAGGTGGC<br>AATAAATTTT | ACTCTGAA-T<br>TGCTTGTTAA |
| MAM1_SP134 | CAGAGCTAAA<br>TCAGACTTCT<br>AGCCACCCAC | AGAGAGAGAA<br>AGCCTCCTAA<br>TTGTGGTATT | TG-TTTCCCC<br>ACTGTGAGAA<br>TCTGT | TAGAGGTGGC<br>AATAAACTTC | ACTCTGAA-T<br>TGCTTGTTAA |
| MAST_B060_ | TAGAGCTGAC<br>TCAGACTTTT<br>AGCCACCCAT | AGAGAG--AA<br>AGCCTCCTAA<br>TTGTGGTATT | GGCTTTCCCC<br>TCTGTGAGAA<br>TCTAT | TAGAGTTGGC<br>AATAAATTTT | AC-CTGAAAT<br>TGCTTGTTAA |
| SAV1_SE210 | CAGAGCTAAA<br>TCAGACTTCT<br>AGCCACCCAC | AGAGAGAGAA<br>AGCCTCCTAA<br>TTGTGGTATT | TG-TTTCCCC<br>ACTGTGAGAA<br>TCTGT | TAGAGGTGGC<br>AATAAATTTT | ACTCTGAA-T<br>TGCTTGTTAA |

1 1 1 1 1  
5 133

|            |                                        |                                        |                                        |                                |                        |
|------------|----------------------------------------|----------------------------------------|----------------------------------------|--------------------------------|------------------------|
| ASIAN2_Ema | AGGAATATTT<br>ACACTGTGCC<br>TTCCCAACCT | TCTAGCCCAA<br>ATTCAGGATA<br>CCTCGAAAGG | ACTACCAGGA<br>TCACGCAGCT<br>AACATTTTTT | GTTTTCCAAG<br>CCGTTCCAA<br>CCA | CAAATTTT<br>GGGAATAAAA |
| FOR_DS1535 | AGGAATATTT<br>ACACTGTGCC<br>TTCCCAACCT | TCTAGCCCAA<br>ATTCAGGATA<br>CCTCGAAAGG | ACTACCAGGA<br>TCACGCAGCT<br>AACATTTTTT | GTTTTCCAAG<br>CCGTTCCAA<br>CCA | CAAATTTT<br>GGGAATAAAA |
| MAM1_SP134 | AGGAATATTT<br>ACACTGTGCC<br>TTCCCAACCT | TCTAGCCCAA<br>ATTCAGGATA<br>CCTCGAAAGG | ACTACCAGGA<br>TCATGCAGCT<br>AACATTTTTT | GTTTTCCAAG<br>CCGTTCCAA<br>CCA | CAAATTTT<br>GGGAATAAAA |
| MAST_B094_ | AGGAATATTT<br>ATATTGTGCT<br>TTACGA---- | TCTAGCGCAA<br>ATTTAGGATA<br>--TGTAAG-  | ACTACCAGGA<br>TCAGGCAGCT<br>---ATTTTTT | GTTTTCCAAG<br>CTGTTCCAA<br>GCT | CAATTTT<br>GGGAATA--   |
| SAV1_SE210 | AGGAATATTT<br>ACACTGTGCC<br>TTCCCAACCT | TCTAGCCCAA<br>ATTCAGGATA<br>CCTCGAAAGG | ACTACCAGRA<br>TCACGCAGCT<br>AACATTTTTT | GTTTTCCAAG<br>CCGTTCCAA<br>CCA | CAAATTTT<br>GGGAATAAAA |

1 1 1 1 1  
5 119

|            |                                        |                                       |                           |                          |                          |
|------------|----------------------------------------|---------------------------------------|---------------------------|--------------------------|--------------------------|
| ASIAN2_Ema | TATCCACCTA<br>ACCGTCACTT<br>ATAGGGCACA | GGGGAGCCTG<br>GCTAATTCAG<br>AAA-GTGAG | TCTCATAACC<br>TCCATATAACC | GATGAACCCC<br>ACCATCTTCA | GATACACCTT<br>GCAAACCCCT |
| FOR_DS1535 | TATCCACCTA<br>ACCGTCACTT<br>ATAGGGCACA | GGGGAGCCTG<br>GCTAATTCAG<br>AAA-GTGAG | TCTCGTAACC<br>TCCATATAACC | GATGAACCCC<br>ACCATCTTCA | GATACACCTT<br>GCAAACCCCT |
| MAM1_SP134 | TATCCACCTA<br>ACCGTCACTT<br>ATAGGGCACA | GGGGAGCCTG<br>GCTAATTCAG<br>AAA-GTGAG | TCTCGTAACC<br>TCCATATAACC | GATGAACCCC<br>ACCATCTTCA | GATACACCTT<br>GCAAACCCCT |
| MAST_B099_ | TATCCACCTA<br>ACCGTCACTT<br>NTAGGGCACA | GGGGAGCCTG<br>GCTAATTCAG<br>AAAAGTAAA | TCTCGTAACC<br>TCCATATAACC | GATGAACCCC<br>ACCATTTTCA | GGTATACCTT<br>GTAAACCCCT |
| SAV1_SE210 | TATCCACCTA<br>ACCGTCACTT<br>ATAGGGCACA | GGGGAGCCTG<br>GCTAATTCAG<br>AAA-GTGAG | TCTCGTAACC<br>TCCATATAACC | GATGAACCCC<br>ACCATCTTCA | GATACACCTT<br>GCAAACCCCT |

1 1 1 1 1  
5 118

|            |                                        |                                      |                          |                          |                          |
|------------|----------------------------------------|--------------------------------------|--------------------------|--------------------------|--------------------------|
| ASIAN2_Ema | TGGTGATTAG<br>GCAGATTCTT<br>AAGCAGCCAA | AGCCCCTGCA<br>GGGCCTCCAA<br>GTGTTCTT | TCGGAATCTC<br>GGGTGGGGCC | TGGGAATATC<br>TGGGATTCTG | TGTTAATACT<br>CATTCTCAAC |
| FOR_DS1535 | TGGTGATTAG                             | AGCYCCTGCA                           | TCGGAATCTC               | TGGGAATATC               | TGTTAATACT               |



|            |            |            |            |            |            |
|------------|------------|------------|------------|------------|------------|
|            | GCAGATTCT  | GGGCCTCCAA | GGGTGGGGCC | TGGGATTCTG | CATTCTCAAC |
| MAM1_SP134 | AAGCAGCCAA | GTGTTCT    |            |            |            |
|            | TGGTGATTAG | AGCCCCTGCA | TCGGAATCTC | TGGGAATATC | TGTTAATACT |
|            | GCAGATTCT  | GGGCCTCCAA | GGGTGGGGCC | TGGGATTCTG | CATTCTCAAC |
|            | AAGCAGCCAA | GTGTTCT    |            |            |            |
| MAST_B100_ | TGGTGATTAG | AGCCCCTGCA | TCGGAATCTC | TGGGAATATC | TGTTAATACT |
|            | GCAGATTCT  | GGGCCTCCAA | GGGTGGGGCC | TGGGATTCTG | CATTCTCAAC |
|            | AAGCAGCCAA | ATATTCT    |            |            |            |
| SAV1_SE210 | TGGTGATTAG | AGCCCCTGCA | TCGGAATCTC | TGGGAATATC | TGTTAATACT |
|            | GCAGATTCT  | GGGCCTCCAA | GGGTGGGGCC | TGGGATTCTG | CATTCTCAAC |
|            | AAGCAGCCAA | GTGTTCT    |            |            |            |

1 1 1 1 1  
5 116

|            |            |            |            |            |            |
|------------|------------|------------|------------|------------|------------|
| ASIAN2_Ema | CTGGAAGCAC | TTACTCTTAA | CAGTAGGTTA | AAGTCACCGC | ATTTCTGATT |
|            | GCTTCATCTG | GCAAAGGCAG | CTTCACTCAA | GGCCATATCA | CAGAATTCCA |
|            | GGTGTAGCAG | TTCAAT     |            |            |            |
| FOR_DS1535 | CTGGAAGCAC | TTACTCTTAA | CAGTAGGTTA | AAGTCACCGC | ATTTCTGATT |
|            | GCTTCATCTG | GCAAAGGCAG | CTTYGCTCAA | GGCCATATCA | CAGAATTCCA |
|            | GGTGTAGCAG | TTCAAT     |            |            |            |
| MAM1_SP134 | CTGGAAGCAC | TTACTCTTAA | CAGTAGGTTA | AAGTCACCGC | ATTTCTGATT |
|            | GCTTCATCTG | GCAAAGGCAG | CTTCACTCAA | GGCCATATCA | CAGAATTCCA |
|            | GGTGTAGCAG | TTCAAT     |            |            |            |
| MAST_B101_ | CTGGAAGTAC | TTACTCTTAA | CAGTAGGTTA | AAGTCACCGC | ACTTCTGATT |
|            | GCTTCATCTG | GCAAAGGCAG | CTTCGCTCAA | GGCCATATCA | CAGAATTCCA |
|            | GGTGTAGCAG | TTCAAT     |            |            |            |
| SAV1_SE210 | CTGGAAGCAC | TTACTCTTAA | CAGTAGGTTA | AAGTCACCGC | ATTTCTGATT |
|            | GCTTCATCTG | GCAGAGGCAG | CTTTGCTCAA | GGCCATATCA | CAGAATTCCA |
|            | GGTGTAGCAG | TTCAAT     |            |            |            |

1 1 1 1 1  
5 116

|            |            |             |            |            |            |
|------------|------------|-------------|------------|------------|------------|
| ASIAN2_Ema | AGATGAAATG | AAATGGGGCT  | AATAGGCATT | TTTAAAGAGA | AGGCAAAGTA |
|            | ATTCAGAGCA | GGAGGTATGA  | AGCTCAGGAC | CATGGAGATT | T-CTTGCTTT |
|            | -GGTTTTAGA | ATCTTA      |            |            |            |
| FOR_DS1535 | AGATGAAATG | AAATGGGTGCT | AATAGGCATT | TTTAAAGAGA | AGGCAAAGTA |
|            | ATTCGGAGCA | GGAGGTATGA  | AGCTCAGGAC | CGTGGAGATT | T-CTTGCTTT |
|            | -GGTTTTAGA | ATCTTA      |            |            |            |
| MAM1_SP134 | AGATGAAATG | AAATGGGTGCT | AATAGGCATT | TTTAAAGAGA | AGGCAAAGTA |
|            | ATTCGGAGCA | GGAGGTATGA  | AGCTCAGGAC | CGTGGAGATT | T-CTTGCTTT |
|            | -GGTTTTAGA | ATCTTA      |            |            |            |
| MAST_B102_ | AGATGAAATG | AAATGGGTGCT | AATAGGCATT | TTTAAAGAGA | AGGCAAAGTA |
|            | ATTCGGAGCG | GGAGATATGA  | AGCTCAGGAC | CGTGGAGATT | TTCTTGCTTT |
|            | TGGTTTTGGA | ATCTTA      |            |            |            |
| SAV1_SE210 | AGATGAAATG | AAATGGGTGCT | AATAGGCATT | TTTAAAGAGA | AGGCAAAGTA |
|            | ATTCGGAGCA | GGAGGTATGA  | AGCTCAGGAC | CGTGGAGATT | T-CTTGCTTT |
|            | -GGTTTTAGA | ATCTTA      |            |            |            |

1 1 1 1 1  
5 115

|            |            |            |            |            |            |
|------------|------------|------------|------------|------------|------------|
| ASIAN2_Ema | AGCCCTACCC | CTATTTTCCC | AAGAAGGATC | CAATTCCTTC | CGAGCTGTGT |
|            | GCTTTCTCAT | GCTGACCTGA | TATCTGAAAC | TTTGCTGAAA | A-GTTCTTGT |
|            | CTTTCTAACT | AAACC      |            |            |            |
| FOR_DS1535 | AGCCCTACCC | CTATTTTCCC | AAGAAGGATC | CAATTCCTTC | CGAGCTGTGT |
|            | GCTTTCTCAT | GCTGACCTGA | TATCTGAAAC | TTTGCTGAAA | A-GTTCTTGT |
|            | CTTTCTAACT | AAACC      |            |            |            |
| MAM1_SP134 | AGCCCTACCC | CTATTTTCCC | AAGAAGGATC | CAATTCCTTC | CGAGCTGTGT |
|            | GCTTTCTCAT | GCTGACCTGA | TATCTGAAAC | TTTGCTGAAA | A-GTTCTTGT |
|            | CTTTCTAACT | AAACC      |            |            |            |
| MAST_B152_ | AGTTCTACCC | CTATTTTCCC | AAGAAGGATC | CAATTCCTTC | TGAGCTGTGT |
|            | GCTTTCTTAT | GCTGACCTGA | TATCTGAAAC | TTTGCTGAAA | AAATTCTTAT |
|            | CTTTCTAACT | AAACC      |            |            |            |
| SAV1_SE210 | AGCCCTACCC | CTATTTTCCC | AAGAAGGATC | CAATTCCTTC | CGAGCTGTGT |
|            | GCTTTCTCAT | GCTGACCTGA | TATCTGAAAC | TTTGCTGAAA | A-GTTCTTGT |
|            | CTTTCTAACT | AAACC      |            |            |            |

1 1 1 1 1  
5 116

|            |                                        |                                    |                          |                          |                           |
|------------|----------------------------------------|------------------------------------|--------------------------|--------------------------|---------------------------|
| ASIAN2_Ema | CTTCCGTAAA<br>GCTATGAGTT<br>GTTTTTTT-G | GATTATAGCC<br>GGAACCAACT<br>GTATCT | TGTGGAAACC<br>CAATGGCAAT | CTACCCTGTT<br>AGGTTTC-AG | TTATAGGGCT<br>GGTTTTTTT-  |
| FOR_DS1535 | CTTCCGTAAA<br>GCTATGAGTT<br>GTTTTTTT-G | GATTATAGCC<br>GGAACCAACT<br>GTATCT | TGTGGAAACC<br>CAATGGCAAT | CTACCCTGTT<br>AGGTTTC-AG | TTATAGGGCT<br>GGTTTTTTT-  |
| MAM1_SP134 | CTTCCGTAAA<br>GCTATGAGTT<br>GTTTTTTT-G | GATTATAGCC<br>GGAACCAACT<br>GTATCT | TGTGGAAACC<br>CAATGGCAAT | CTACCCTGTT<br>AGGTTTC-AG | TTATAGGGCT<br>GGTTTTTTT-  |
| MAST_B105_ | TTTTCGTAAA<br>GCTATGAGTT<br>ATTTTTTT-G | GATTATAGCC<br>GGAACCAACT<br>GTATCT | TGTGGAAACC<br>CAATGGCAAT | CTACCCTGTT<br>AGGTTTCTAG | TTATAGGGCT<br>GGTTTTTTTTT |
| SAV1_SE210 | CTTCCGTAAA<br>GCTATGAGTT<br>GTTTTTTT-G | GATTATAGCC<br>GGAACCAACT<br>GTATCT | TGTGGAAACC<br>CAATGGCAAT | CTACCCTGTT<br>AGGTTTC-AG | TTATAGGGCT<br>GGTTTTTTT-  |

1 1 1 1 1  
5 115

|            |                                        |                                   |                          |                          |                          |
|------------|----------------------------------------|-----------------------------------|--------------------------|--------------------------|--------------------------|
| ASIAN2_Ema | TCTGCTGTGA<br>GTAGAGCTCA<br>GCCAGAAGAT | TTTGTGAGTG<br>CCCTT----C<br>GTTCA | TGGCTGAGAG<br>AGGAGGCGGG | CTGGGACCTG<br>TTCAAGGCCA | TTCTCCCTCC<br>TGAGAGCCAA |
| FOR_DS1535 | TCTGCTGTGA<br>GTAGAGCTCA<br>GCCAGAAGAT | TTTGTGAGTG<br>CCCTTACTYC<br>GTTCA | TGGCTGAGAG<br>AGGAGGCGGG | CTGGGACCTG<br>TTCAAGGCCA | TTCTCCCTCC<br>TGAGAGCCAA |
| MAM1_SP134 | TCTGCTGTGA<br>GTAGAGCTCA<br>GCCAGAAGAT | TTTGTGAGTG<br>CCCTTACTTC<br>GTTCA | TGGCTGAGAG<br>AGGAGGCGGG | CTGGGACCTG<br>TTCAAGGCCA | TTCTCCCTCC<br>TGAGAGCCAA |
| MAST_B106_ | TCTGCTGTGA<br>GTAGAGCTCA<br>GCCAGAAAAT | TTTGTGAGTG<br>CCCTTACTTC<br>ATTCA | TGGCTGAGAG<br>AGGAGACAAA | CTGGGACCTG<br>TTCAAGGCCA | TTCTCCCTCC<br>TGAAAGCCAA |
| SAV1_SE210 | TCTGCTGTGA<br>GTAGAGCTCA<br>GCCAGAAGAT | TTTGTGAGTG<br>CCCTTACTTC<br>GTTCA | TGGCTGAGAG<br>AGGAGGCGGG | CTGGGACCTG<br>TTCAAGGCCA | TTCTCCCTCC<br>TGAGAGCCAA |

1 1 1 1 1  
5 115

|            |                                        |                                   |                          |                          |                          |
|------------|----------------------------------------|-----------------------------------|--------------------------|--------------------------|--------------------------|
| ASIAN2_Ema | GAAGCCGACT<br>TACTCTTGGC<br>AATT--ATCA | GCTGAGCCC-<br>TCCAATTCTC<br>-AGAA | TGCAGCGTGG<br>TGTGAAGGGC | TCACTCATCA<br>TTGCACTCTC | ACGATGACCA<br>TGT-----G  |
| FOR_DS1535 | GAAGCCGACT<br>TACTCTTGGC<br>AATT--MTCA | GCTGAGCCC-<br>TCCAATTCTC<br>-AGAA | TGCAGCGTGG<br>TGTGAAGGGC | TCACTCATCA<br>TTGCACTCTC | ACRATGACCA<br>TGT-----G  |
| MAM1_SP134 | GAAGCCGACT<br>TACTCTTGGC<br>AATT--ATCA | GCTGAGCCC-<br>TCCAATTCTC<br>-AGAA | TGCAGCGTGG<br>TGTGAAGGGC | TCACTCATCA<br>TTGCACTCTC | ACGATGACCA<br>TGT-----G  |
| MAST_B107_ | GAAGTTGATT<br>TACTCTTGGC<br>TATGCTATCC | GCTGAACCCC<br>TTTAATTCTC<br>TACAA | TGCAGCGTGG<br>TGTGAAGGGC | TCACTCATCA<br>TTGCACTCTC | ACGATGACCA<br>TGTTGAGGCG |
| SAV1_SE210 | GAAGCCGACT<br>TACTCTTGGC<br>AATT--ATCA | GCTGAGCCC-<br>TCCAATTCTC<br>-AGAA | TGCAGCGTGG<br>TGTGAAGGGC | TCACTCATCA<br>TTGCACTCTC | ACGATGACCA<br>TGT-----G  |

1 1 1 1 1  
5 118

|            |                                        |                                      |                          |                          |                          |
|------------|----------------------------------------|--------------------------------------|--------------------------|--------------------------|--------------------------|
| ASIAN2_Ema | TCAGTGATTC<br>AGTTTGCTGT<br>CGAGGAGGAG | TAAATATGAA<br>TCATAGCATC<br>GCATATCG | ACCWTCTCCC<br>GGCAACACCT | AGCTCTGCTC<br>ACCACATCCA | TGGAGCTGTC<br>CGAATGTGCG |
| FOR_DS1535 | TCAGTGATTC<br>AGTTTGCTGT<br>CGAGGAGGAG | TAAATATGAA<br>TCATAGCATC<br>GCATATCG | ACCATCTCCC<br>GGCAACACCT | AGCTCTGCTC<br>ACCACATCCA | TGGAGCTGTC<br>CGAATGTGCG |
| MAM1_SP134 | TCAGTGATTC<br>AGTTTGCTGT<br>CGAGGAGGAG | TAAATATGAA<br>TCATAGCATC<br>GCATATCG | ACCATCTCCC<br>GGCAACACCT | AGCTCTGCTC<br>ACCACATCCA | TGGAGCTGTC<br>CGAATGTGCG |
| MAST_B154_ | TTAGTGATTC<br>AGTTTGCTGT<br>-GAAGAGGAG | TAAATATGAA<br>TCATAGCATC<br>GCATATCA | ACCATCTCCC<br>GGCAACACCT | AGCTCTGCTC<br>AC-ACATC-A | TGGAGCTGTC<br>CGAATGTGCG |
| SAV1_SE210 | TCAGTGATTC                             | TAAATATGAA                           | ACCATCTCCC               | AGCTCTGCTC               | TGGAGCTGTC               |

AGTTTGCTGT TCATAGCATC GGCAACACCT ACCACATCCA CGAATGTCGC  
CGAGGAGGAG GCATATCG

1 1 1 1 1  
5 114

|            |                                        |                                 |                          |                          |                          |
|------------|----------------------------------------|---------------------------------|--------------------------|--------------------------|--------------------------|
| ASIAN2_Ema | CCTTCGTCTC<br>GAGTGCCACC<br>CTTTTCAAAG | ATGCATTATG<br>TGCCACAGT<br>GGTG | AGGAGTTCTG<br>ACACCCCGAG | GCCACCTTGG<br>GCKKAGATCT | CTGCCATGCT<br>GCTGCCTTTG |
| FOR_DS1535 | CCTTCGTCTC<br>GAGTGCCACC<br>CTTTTCAAAG | ATGCATTATG<br>TGCCACAGT<br>GGTG | AGGAGTTCTG<br>ACACCCCGAG | GCCACCTTGG<br>GCCRAGATCT | CTGCCATGCT<br>GCTGCCTTTG |
| MAM1_SP134 | CCTTCGTCTC<br>GAGTGCCACC<br>CTTTTCAAAG | ATGCATTATG<br>TGCCACAGT<br>GGTG | AGGAGTTCTG<br>ACACCCCGAG | GCCACCTTGG<br>GCCGAGATCT | CTGCCATGCT<br>GCTGCCTTTG |
| MAST_B156_ | CCTTCGTCTC<br>GGGTGCCACC<br>CTTTTCAAAG | ATGCATTATA<br>TGCCACAGT<br>GGTA | AGGAGTTCTG<br>ACACCCCGAG | GCCACCTTGG<br>GCCGAGATCT | CTGCCATGCT<br>GCTGCCTTTG |
| SAV1_SE210 | CCTTCGTCTC<br>GAGTGCCACC<br>CTTTTCAAAG | ATGCATTATG<br>TGCCACAGT<br>GGTG | AGGAGTTCTG<br>ACACCCCGAG | GCCACCTTGG<br>GCCGAGATCT | CTGCCATGCT<br>GCTGCCTTTG |

1 1 1 1 1  
5 116

|            |                                        |                                   |                          |                          |                          |
|------------|----------------------------------------|-----------------------------------|--------------------------|--------------------------|--------------------------|
| ASIAN2_Ema | TAAAGTGGCC<br>AAGCAGTGAA<br>-----AAA   | TTGGTGCAAT<br>GTTCTGGAG<br>TACATC | GGCAAAAATA<br>ATCACATGGC | TGAAGCCGAC<br>AGGAGCCGTC | AACGATTCTG<br>-CTG-----  |
| FOR_DS1535 | TAAAGTGGCC<br>AAGCAGTGAA<br>-----AAA   | TTGGTGCAAT<br>GTTCTGGGG<br>TACATC | GGCAAAAATA<br>ATCACATGGC | TGAAGCCGAC<br>AGGAGCCGTC | AACGATTCTG<br>-CTG-----  |
| MAM1_SP134 | TAAAGTGGCC<br>AAGCAGTGAA<br>-----AAA   | TTGGTGCAAT<br>GTTCTGGGG<br>TACATC | GGCAAAAATA<br>ATCACATGGC | TGAAGCCGAC<br>AGGAGCCGTC | AACGATTCTG<br>-CTG-----  |
| MAST_B109_ | TAAAGTGGCC<br>AAGCAGTGAA<br>GGGCAAAAAA | TTGGTGCAAT<br>GTTCTGGGG<br>TACCTT | GGCAAAAATA<br>GTGG-AGGG- | TGAAGCCGAC<br>ATGTTTCTTC | AACGATTCTG<br>TCTGCAGAAA |
| SAV1_SE210 | TAAAGTGGCC<br>AAGCAGTGAA<br>-----AAA   | TTGGTGCAAT<br>GTTCTGGGG<br>TACATC | GGCAAAAATA<br>ATCACATGGC | TGAAGCCGAC<br>AGGAGCCGTC | AACGATTCTG<br>-CTG-----  |

1 1 1 1 1  
5 114

|            |                                        |                                  |                          |                          |                          |
|------------|----------------------------------------|----------------------------------|--------------------------|--------------------------|--------------------------|
| ASIAN2_Ema | TTTATTAGGT<br>GGCCAACCTG<br>TGGAGTCCAC | GAGTGGCTTG<br>TGCTTCCAGA<br>TCTC | CCGACCCCAG<br>CGCCTCACAC | AGCTGACATG<br>AAGATGCTGG | GCTGCTCAAT<br>TCAGGGAAAC |
| FOR_DS1535 | TTTATTAGGT<br>GGCCAACCTG<br>TGGAGTCCAC | GAGTGGCTTG<br>TGCTTCCAGA<br>TCTC | CCGACCCCAG<br>CGCCTCACAC | AGCTGACATG<br>AAGATGCTGG | GCTGCTCAAT<br>TCAGGGAAAC |
| MAM1_SP134 | TTTATTAGGT<br>GGCCAACCTG<br>TGGAGTCCAC | GAGTGGCTTG<br>TGCTTCCAGA<br>TCTC | CCGACCCCAG<br>CGCCTCACAC | AGCTGACATG<br>AAGATGCTGG | GCTGCTCAAT<br>TCAGGGAAAC |
| MAST_B110_ | TTTATTAGGT<br>GGCCAACCTG<br>TGGAGTCCAC | GAGTGGCTTG<br>TGCTTCCAGA<br>TCTC | CCGACCCCAG<br>CGCCTCACAC | AGCTGACATG<br>AAGATGCTGG | GCTGCTCAAT<br>TCAGGGAAAC |
| SAV1_SE210 | TTTATTAGGT<br>GGCCAACCTG<br>TGGAGTCCAC | GAGTGGCTTG<br>TGCTTCCAGA<br>TCTC | CCGACCCCAG<br>CGCCTCACAC | AGCTGACATG<br>AAGATGCTGG | GCTGCTCAAT<br>TCAGGGAAAC |

1 1 1 1 1  
5 114

|            |                                        |                                  |                          |                          |                          |
|------------|----------------------------------------|----------------------------------|--------------------------|--------------------------|--------------------------|
| ASIAN2_Ema | TTTSTATTTT<br>CCCAYTTGAC<br>TTCCAGTTTG | ATTGCAAGAT<br>CACAGCRAAA<br>TCTT | TCTGCCTTTC<br>GGACAAACCT | ATACATATGA<br>CATCACAGCC | CCCACAATTT<br>ATTAGGGTAC |
| FOR_DS1535 | TTTCTATTTT<br>CCCATTTGAC<br>TTCCAGTTTG | ATTGCAAGAT<br>CACAGCGAAA<br>TCTT | TCTGCCTTTC<br>GGACAAACCT | ATACATATGA<br>CATCACAGCC | CCCACAATTT<br>ATTAGGGTAC |
| MAM1_SP134 | TTTGTGTTTC<br>CCCATTTGAC               | ATTGCAAGAT<br>CACAGCAAAA         | TCTGCCTTTC<br>GGACAAACCT | ATACATATGA<br>CATCACAGCC | CCCACAATTT<br>ATTAGGGTAC |

|            |                                                      |                                          |                          |                          |                          |
|------------|------------------------------------------------------|------------------------------------------|--------------------------|--------------------------|--------------------------|
| MAST_B111_ | TTCCAGTTTG<br>TTTGTATTTT<br>CCCATTTGAC<br>TTCCAGTTTG | TCTT<br>ATTGCAAGAT<br>CACAGCAAAA<br>TCTT | TCTGCCTTTC<br>GGACAAACCT | ATACATATGA<br>CATCACAGCC | CCCACAATTT<br>ATTAGGGTAC |
| SAV1_SE210 | TTTGTATTTT<br>CCCATTTGAC<br>TTCCGGTTTG               | ATTGCAAGAT<br>CACAGCGAAA<br>TCTT         | TCTGCCTTTC<br>RGACAAACCT | ATACATATGA<br>CATCACAGCC | CCCACAATTT<br>ATTAGGGTAC |

1 1 1 1 1  
5 114

|            |                                        |                                  |                          |                          |                          |
|------------|----------------------------------------|----------------------------------|--------------------------|--------------------------|--------------------------|
| ASIAN2_Ema | CTGCAGACAG<br>CTGTCAGGAA<br>GAGAGCAAAT | GCCTAGAACG<br>ACAGGACAGG<br>AGGA | AAGGCTGCAT<br>GGGCCGGCGT | GTCCCTGCCT<br>CCTCCAAGGA | GGGCTGCTTG<br>CTGTCACGTG |
| FOR_DS1535 | CTGCAGACAG<br>CTGTCAGGAA<br>GAGAGCAAAT | GCCTAGAATG<br>ACCGGACAGG<br>AGGA | AAGGCTGCAT<br>GGGCCGGCGT | GTCCCTGCCT<br>CCTCCAAGGA | GGGCTGCTTG<br>CTGTCATGTG |
| MAM1_SP134 | CTGCAGACAG<br>CTGTCAGGAA<br>GAGAGCAAAT | GCCTAGAACG<br>ACAGGACAGG<br>AGGA | AAGGCTGCAT<br>GGGCCGGCGT | GTCCCTGCCT<br>CCTCCAAGGA | GGGCTGCTTG<br>CTGTCACGTG |
| MAST_B112_ | CTGCAGACAG<br>CTGTCAGGAA<br>GAAAACAAAT | GCCTAGAATG<br>ACTGGACAGG<br>AGAA | AAGGCTGCAT<br>GAGCCGGCGT | GTCCCAGCCT<br>CCTCCAAGGA | GGGCTGCTTG<br>CTGTCACGTA |
| SAV1_SE210 | CTGCAGACAG<br>CTGTCGGGAA<br>GAGAGCAAAT | GCCTAGAACG<br>ACCGGACAGG<br>AGGA | AAGGCTGCAT<br>GGGCCGGCGT | GTCCCTGCCT<br>CCTCCAAGGA | GGGCTGCTTG<br>CTGTCATGTG |

1 1 1 1 1  
5 114

|            |                                        |                                  |                          |                          |                           |
|------------|----------------------------------------|----------------------------------|--------------------------|--------------------------|---------------------------|
| ASIAN2_Ema | GTGCAACCAT<br>TGCTGTTTTA<br>CCTTGACAAC | TACCGTGTTT<br>CAACCTGCAA<br>AATG | CCAGCCTGTG<br>TTCCATTAAT | AAGGAGAGCT<br>ACTGAAAAAG | GGATAGCCAA<br>AAGGTAAGTGA |
| FOR_DS1535 | GTGCAACCAT<br>TGCCGTTTTA<br>CCTTGACAAC | TACCGTGTTT<br>CAACCTGCAA<br>AATG | CCAGCCTGTG<br>TTCCATTAAT | AAGGAGAGCT<br>ACTGAAAAAG | GGATAGCCAA<br>AAGGTAAGTGA |
| MAM1_SP134 | GTGCAACCAT<br>TGCCGTTTTA<br>CCTTGACAAC | TACCGTGTTT<br>CAACCTGCAA<br>AATG | CCAGCCTGTG<br>TTCCATTAAT | AAGGAGAGCT<br>ACTGAAAAAG | GGATAGCCAA<br>AAGGTAAGTGA |
| MAST_B157_ | GTGCAACCAT<br>TGCCGTTTTA<br>CCTTGACAAC | TACCGTGTTT<br>CAACCTGCAA<br>AATG | CCGGCTTGTG<br>TTCCATTAAT | AAGGAGAGCT<br>ACTGAAAAAG | GGATAGCCAA<br>AAGGTAAGTGA |
| SAV1_SE210 | GTGCAACCAT<br>TGCCGTTTTA<br>CCTTGACAAC | TACCGTGTTT<br>CAACCTGCAA<br>AATG | CCAGCCTGTG<br>TTCCATTAAT | AAGGAGAGCT<br>ACTGAAAAAG | GGATAGCCAA<br>AAGGTAAGTGA |

1 1 1 1 1  
5 114

|            |                                         |                                  |                          |                          |                          |
|------------|-----------------------------------------|----------------------------------|--------------------------|--------------------------|--------------------------|
| ASIAN2_Ema | TTTCCATGTA<br>GGGGAGCCCA<br>-CAGCTGCTC  | CTGAAGGCTT<br>TGGCACGTTA<br>ATCC | G-CTCTCAGA<br>GTTGTCTGGA | AGCTGGGGAG<br>AAAGCCCATG | CTGGGAGAAC<br>AGGCAGCCAA |
| FOR_DS1535 | CTTCCATGTA<br>GGGGAGCCCA<br>-CGGCTGCTC  | CTGAAGGCTT<br>TGGCACGTTA<br>ATCC | G-CTCTCAGA<br>GTTGTCTGGA | AGCTGGGGAG<br>AAAGCCCATG | CTGGGAGAAC<br>AGGCAGCCAA |
| MAM1_SP134 | TTTCCATGTA<br>AGGGAGCCCA<br>-CAGCTGCTC  | CTGAAGGCTT<br>TGGCACGTTA<br>ATCC | G-CTCTCAGA<br>GTTGTCTGGA | AGCTGGGGAG<br>AAAGCCCATG | CTGGGAGAAC<br>AGGCAGCCAA |
| MAST_B158_ | TTTTTCATGTA<br>GGGGAGCCCA<br>ACAGCTGCTC | CTGAAGGCTT<br>TGGCACATTA<br>ATCC | GTCTCTCAGA<br>GTTGTCTGGA | AGCTGGGG-G<br>AAAGCCCATG | CTGGGAGAAC<br>AGGCAGCTAA |
| SAV1_SE210 | CTTCCATGTA<br>GGGGAGCCCA<br>-CGGCTGCTC  | CTGAAGGCTT<br>TGGCACGTTA<br>ATCC | G-CTCTCAGA<br>GTTGTCTGGA | AGCTGGGGAG<br>AAAGCCCATG | CTGGGAGAAC<br>AGGCAGCCAA |

1 1 1 1 1  
5 116

|            |                                        |                                   |                          |                          |                          |
|------------|----------------------------------------|-----------------------------------|--------------------------|--------------------------|--------------------------|
| ASIAN2_Ema | CACCACGTAT<br>ACCCACGGTT<br>AAGCTGAAAC | AAGAATTTT<br>CTGCTGAGAC<br>ACCAAT | CACCTAGAAC<br>TGTGAGGATT | CATAAAACTT<br>GAGAAAGTGA | AGGATACAGA<br>TGTGGCTTTT |
|------------|----------------------------------------|-----------------------------------|--------------------------|--------------------------|--------------------------|

|            |                                        |                                    |                          |                          |                          |
|------------|----------------------------------------|------------------------------------|--------------------------|--------------------------|--------------------------|
| FOR_DS1535 | CACCACGTAT<br>ACCCACGGTT<br>AAGCTGAAAC | AAGAATTTTA<br>CTGCTGAGAC<br>ACCAAT | CACCTAGAAC<br>TGTGAGGATT | CATAAAACTT<br>GAGAAAGTGA | AGGATACAGA<br>TGTGGCTTTT |
| MAM1_SP134 | CACCACGTAT<br>ACCCACGGTT<br>AAGCTGAAAC | AAGAATTTTA<br>CTGCTGAGAC<br>ACCAAT | CACCTAGAAC<br>TGTGAGGATT | CATAAAACTT<br>GAGAAAGTGA | AGGATACAGA<br>TGTGGCTTTT |
| MAST_B159_ | CACCAGGTAT<br>ACCTACGGTT<br>AAGCTGAAAC | AAGAATTTTA<br>CTGCTGAGAC<br>ACCAAT | CACCTAGAAC<br>TGTGAGGATT | -ATGAA-CTT<br>GAGAAAGTGA | AG-ATACAGA<br>TGTGGCTTTT |
| SAV1_SE210 | CACCACGTAT<br>ACCCACGGTT<br>AAGCTGAAAC | AAGAATTTTA<br>CTGCTGAGAC<br>ACCAAT | CACCTAGAAC<br>TGTGAGGATT | CATAAAACTT<br>GAGAAAGTGA | AGGATACAGA<br>TGTGGCTTTT |

1 1 1 1 1  
5 113

|            |                                        |                                 |                          |                          |                          |
|------------|----------------------------------------|---------------------------------|--------------------------|--------------------------|--------------------------|
| ASIAN2_Ema | TCGATTCTGA<br>AGAGTTTCCA<br>GCAGCCGTAG | CTCATAGCGA<br>AGGAGCACCT<br>CAC | CCCTATAGGA<br>GGCAGATTTG | CAGAGTAGAA<br>AAGTGCCGAC | CTGCCCCAC-<br>CCTTTGATTA |
| FOR_DS1535 | TCGATTCTGA<br>AGAGTTTCCA<br>GCAGCYGTAG | CTCATAGCGA<br>AGGAGCACCT<br>CAC | CCCTATAGGA<br>GGCAGATTTG | CAGAGTAGAA<br>AACTGCCGAC | CTGCCCCAC-<br>CCTTTGATTA |
| MAM1_SP134 | TCGATTCTGA<br>AGAGTTTCCA<br>GCAGCCGTAG | CTCATAGCGA<br>AGGAGCACCT<br>CAC | CCCTATAGGA<br>GGCAGATTTG | CAGAGTAGAA<br>AAGTGCCGAC | CTGCCCCAC-<br>CCTTTGATTA |
| MAST_B114_ | TCGATTCTGA<br>AGAGTTTCTA<br>GCATCTGTAG | CACGTAGCGA<br>AGGAGCTCTT<br>CAC | CCCTACAGGA<br>GACAGATTTG | CAGAGCAGAA<br>AACTGCCGAC | CTGCCCCACC<br>CCTTTAATTA |
| SAV1_SE210 | TCGATTCTGA<br>AGAGTTTCCA<br>GCAGCTGTAG | CTCATAGCGA<br>AGGAGCACCT<br>CAC | CCCTATAGGA<br>GGCAGATTTG | CAGAGTAGAA<br>AACTGCCGAC | CTGCCCCAC-<br>CCTTTGATTA |

1 1 1 1 1  
5 143

|            |                                         |                                        |                                        |                                        |                                 |
|------------|-----------------------------------------|----------------------------------------|----------------------------------------|----------------------------------------|---------------------------------|
| ASIAN2_Ema | CCTGCCATGC<br>AAAAAAAAAAW<br>GCACTCAGTA | TCAGCATTTG<br>CCAAGAGCCT<br>AATGTCAGTT | TGAACACGTA<br>ACTGTGGACA<br>GTTTAGTTGC | CCAAGAGCCG<br>GAGTATTAGC<br>TTTGTTGTTG | GCACTAGAAA<br>CACCCAGTAA<br>CCA |
| FOR_DS1535 | CCTGCCATGC<br>-----T<br>GCACTCAGTA      | TCAGCATTTG<br>-----T<br>AATGTCAGTT     | TGAACACGTA<br>ACTGTGGACA<br>GTTTAGTTGC | CCAAGAGCC-<br>GAGTATTAGC<br>TTTGTTGTTG | -----<br>CACCCRGTAA<br>CCA      |
| MAM1_SP134 | CCTGCCATGC<br>-----T<br>GCACTCAGTA      | TCAGCATTTG<br>-----T<br>AATGTCAGTT     | TGAACACGTA<br>ACTGTGGACA<br>GTTTAGTTGC | CCAAGAGCC-<br>GAGTATTAGC<br>TTTGTTGTTG | -----<br>CACCCAGTAA<br>CCA      |
| MAST_B116_ | TTTGTTATGC<br>-----T<br>GCACTCAGTA      | TCAGCATTTG<br>-----T<br>AATGTCAGTT     | TGAACACGTA<br>ACTGTGGACA<br>GTTTAGTTGC | CCAAGAGCC-<br>GAGTATTAGC<br>ATTGTTGTTG | -----<br>CACCCAGTAA<br>CCA      |
| SAV1_SE210 | CCTGCCATGC<br>-----T<br>GCACTCAGTA      | TCAGCATTTG<br>-----T<br>AATGTCAGTT     | TGAACACGTA<br>ACTGTGGACA<br>GTTTAGTTGC | CCAAGAGCC-<br>GAGTATTAGC<br>TTTGTTGTTG | -----<br>CACCCAGTAA<br>CCA      |

1 1 1 1 1  
5 113

|            |                                        |                                 |                          |                          |                          |
|------------|----------------------------------------|---------------------------------|--------------------------|--------------------------|--------------------------|
| ASIAN2_Ema | GATCTGGAGG<br>GTGAGCCCCT<br>ATGTTTTGAG | GATTTCT-CT<br>TTTTGGGTGG<br>ATG | T-ACTTT-TT<br>CGATGAGGGA | -CAGCGAGGA<br>GATGGGTCTT | AAGACACTGG<br>CATCAGATGG |
| FOR_DS1535 | GATCTGGAGG<br>GTGAGCCCCT<br>ATGTTTTGAG | GATTTCT-CT<br>TTTTGGGTGG<br>ATG | T-ACTTT-CT<br>CGATGAGGGA | -CAGYGAGGA<br>GATGGGTCTT | AAGACACTGG<br>CATCAGATGG |
| MAM1_SP134 | GATCTGGAGG<br>GTGAGCCCCT<br>ATGTTTTGAG | GATTTCT-CT<br>TTTTGGGTGG<br>ATG | T-ACTTT-CT<br>CGATGAGGGA | -CAGCGAGGA<br>GATGGGTCTT | AAGACACTGG<br>CATCAGATGG |
| MAST_B163_ | ATTTTGGAGG<br>GTGAGCCCCT<br>ATGTTTTGAG | GATTTCTTCT<br>TTTTGGGTGG<br>ATG | TACTTTTCT<br>CGATGAGG-A  | TCAGCGAGGA<br>GATGGGTCTT | AAGACACTGG<br>CATCAGATGG |
| SAV1_SE210 | GATCTGGAGG<br>GTGAGCCCCT<br>ATGTTTTGAG | GATTTCT-CT<br>TTTTGGGTGG<br>ATG | T-ACTTT-CT<br>CGATGAGGGA | -CAGCGAGGA<br>GATGGGTCTT | AAGACACTGG<br>CATCAGATGG |

1 1 1 1 1

5 133

|            |                                        |                                        |                                        |                                 |                          |
|------------|----------------------------------------|----------------------------------------|----------------------------------------|---------------------------------|--------------------------|
| ASIAN2_Ema | GAGTC-TGAT<br>ATAGGCCTCA<br>CCCAGCCGGC | AAGATTAGGA<br>CCACCTCAGG<br>CAAAGTTCTT | CAGAAAAAGC<br>AGAAACGGCT<br>TGGGCTGGGA | CACCTTT-GT<br>GCTCCGCATA<br>ATT | TTGAAGGTAC<br>GGTGGTCACG |
| FOR_DS1535 | GAGTC-TGAT<br>ATAGGCCTCA<br>CCCAGCCGGC | AAGATTAGGA<br>CCACCTCAGG<br>CAAAGTTCTT | CAGAAAAAGC<br>AGAAACGGCT<br>TGAGCTGGGA | CACCTTT-GT<br>GCTCCGCATA<br>ATT | TTGAAGGTAC<br>GGTGGTCACG |
| MAM1_SP134 | GAGTC-TGAT<br>ATAGGCCTCA<br>CCCAGCCGGC | AAGATTAGGA<br>CCACCTCAGG<br>CAAAGTTCTT | CAGAAAAAGC<br>AGAAACGGCT<br>TGAGCTGGGA | CACCTTT-GT<br>GCTCCGCATA<br>ATT | TTGAAGGTAC<br>GGTGGTCACG |
| MAST_B120_ | GAGTCCTGAT<br>ATAGGCCTCA<br>CCCAGCCAGC | AAGATTAGGA<br>CCACCTCA--<br>CAA--TTCTT | CAGAAAAAGG<br>-----<br>TGAGCTAGGA      | CACCTTTTGT<br>-----TA<br>ATT    | TTGAAGGTAC<br>GGTGGTCACG |
| SAV1_SE210 | GAGTC-TGAT<br>ATAGGCCTCA<br>CCCAGCCGGC | AAGATTAGGA<br>CCACCTCAGG<br>CAAAGTTCTT | CAGAAAAAGC<br>AGAAACGGCT<br>TGAGCTGGGA | CACCTTT-GT<br>GCTCCGCATA<br>ATT | TTGAAGGTAC<br>GGTGGTCACG |

1 1 1 1 1  
5 112

|            |                                        |                                |                          |                          |                          |
|------------|----------------------------------------|--------------------------------|--------------------------|--------------------------|--------------------------|
| ASIAN2_Ema | AAACTCCTGG<br>CATCCCAGGC<br>ACTCACAGAC | ACTGGGGCCT<br>TCCTGGCTCT<br>AC | GGCTGGAGCT<br>ATTCCAGGGG | TTTGGGAACC<br>TTGGATGAGG | ACTCCCTGCC<br>CTGCTCGCCT |
| FOR_DS1535 | AAACTCCTGG<br>CATCCCAGGC<br>ACTCACAGAC | ACTGGGGCCT<br>TCCTGGCTCT<br>AC | GGCTGGAGCT<br>ATTCCAGGGG | TTTGGGAACC<br>TTGGATGAGG | ACTCCCTGCC<br>CTGCTCGCCT |
| MAM1_SP134 | AAACTCCTGG<br>CATCCCAGGC<br>ACTCACAGAC | ACTGGGGCCT<br>TCCTGGCTCT<br>AC | GGCTGGAGCT<br>ATTCCAGGGG | TTTGGGAACC<br>TTGGATGAGG | ACTCCCTGCC<br>CTGCTCGCCT |
| MAST_B166_ | AAACTCCTGG<br>CATCCCAGGC<br>ACTCACAGAC | ACTGGGGCCT<br>TCCTGGCTCT<br>AC | GGCTGGAGCT<br>ATTCCAGGGG | TTTGGAAACC<br>TTGGATGAGG | ACTCCCTGCC<br>CTGCTCGCCT |
| SAV1_SE210 | AAACTCCTGG<br>CATCCCAGGC<br>ACTCACAGAC | ACTGGGGCCT<br>TCCTGGCTCT<br>AC | GGCTGGAGCT<br>ATTCCAGGGG | TTTGGGAACC<br>TTGGATGAGG | ACTCCCTGCC<br>CTGCTCGCCT |

1 1 1 1 1  
5 114

|            |                                        |                                  |                          |                          |                          |
|------------|----------------------------------------|----------------------------------|--------------------------|--------------------------|--------------------------|
| ASIAN2_Ema | TGGAGAAGGT<br>ATGCCCTGTA<br>AAAAAATACT | GGGGACAGGG<br>GATTTTGAGA<br>TCTC | T-GACCACAG<br>ATCAAGTGAG | AACCTACGAG<br>GCAGATCTAC | CAAACCTGAA<br>GAAAAATAAG |
| FOR_DS1535 | TGGAGAAGGT<br>ATGCCCTGTA<br>AAAAAATACT | GGGGACAGGG<br>GATTTTGAGA<br>TCTC | T-GACCACAG<br>ATCAAGTGAG | AACCTACGAG<br>GCAGATCTAC | CAAACCTGAA<br>GAAAAATAAG |
| MAM1_SP134 | TGGAGAAGGT<br>ATGCCCTGTA<br>AAAAAATACT | GGGGACAGGG<br>GATTTTGAGA<br>TCTC | T-GACCACAG<br>ATCAAGTGAG | AACCTACGAG<br>GCAGATCTAC | CAAACCTGAA<br>GAAAAATAAG |
| MAST_B167_ | TGGAGAAGGT<br>ATGCATAGTA<br>AAAAA-TACT | GGGGACAGGG<br>GATTTTGAGA<br>TCTC | T-GACCACAG<br>ATCAAGTGAG | AACCTACGAG<br>GCAGATCTAC | CAAACCTGAA<br>GAAAAATAAG |
| SAV1_SE210 | TGGAGAAGGT<br>ATGCCCTGTA<br>AAAAAATACT | GGGGACAGGG<br>GATTTTGAGA<br>TCTC | T-GACCACAG<br>ATCAAGTGAG | AACCTACGAG<br>GCAGATCTAC | CAAACCTGAA<br>GAAAAATAAG |

1 1 1 1 1  
5 111

|            |                                        |                               |                          |                         |                          |
|------------|----------------------------------------|-------------------------------|--------------------------|-------------------------|--------------------------|
| ASIAN2_Ema | CACTCACCTC<br>CTGAAGAGAA<br>CTGGCCCATG | CTCCTAACCT<br>AGCTGAGGAC<br>G | CATAGCTGGA<br>TSCTGGGAGC | GTCCTGGAT<br>CACAGATTAG | GCCTCTGAAC<br>CCCAGAGCTG |
| FOR_DS1535 | CACTCACCTC<br>CTGAGGAGAA<br>CTGGCCCATG | CTCCTAACCT<br>AGCTGAGGAC<br>G | CATAGCTGGA<br>TGCTGGGAGC | GTCCTGGAT<br>CACAGATTAG | GCCTCTGAAC<br>CCCAGAGCTG |
| MAM1_SP134 | CACTCACCTC<br>CTGAGGAGAA<br>CTGGCCCATG | CTCCTAACCT<br>AGCTGAGGAC<br>G | CATAGCTGGA<br>TGCTGGGAGC | GTCCTGGAT<br>CACAGATTAG | GCCTCTGAAC<br>CCCAGAGCTG |
| MAST_B121_ | CACTCACGTC<br>CTGAGGAGAA<br>CTGGCCCATG | CTCCTAACCT<br>AGCTGAGGAC<br>A | CATAGCTGGA<br>TGCTGGGAGC | GTCCTAGAT<br>CACAGATTAG | GCCTCTGAAC<br>CCCAGAGCTG |

|            |                                        |                               |                          |                         |                          |
|------------|----------------------------------------|-------------------------------|--------------------------|-------------------------|--------------------------|
| SAV1_SE210 | CACTCACCTC<br>CTGAGGAGAA<br>CTGGCCCATG | CTCCTAACCT<br>AGCTGAGGAC<br>G | CATAGCTGGA<br>TGCTGGGAGC | GTCCTGGAT<br>CACAGATTAG | GCCTCTGAAC<br>CCCAGAGCTG |
|------------|----------------------------------------|-------------------------------|--------------------------|-------------------------|--------------------------|

1 1 1 1 1  
5 114

|            |                                        |                                  |                          |                          |                          |
|------------|----------------------------------------|----------------------------------|--------------------------|--------------------------|--------------------------|
| ASIAN2_Ema | CCCCAGGAGG<br>CTCTGCCCTC<br>CTAGATACCA | AAGGGGA-CA<br>TGTAGTAGTT<br>ACCT | CACTCCTCTT<br>TCCAAGCCCA | TGGGCCCTGT<br>GGACCGAGTC | -CTCTCCCAG<br>AGGGTGTGTT |
| FOR_DS1535 | CCCCAGGAGG<br>CTCTGCCCTC<br>CTAGATACCA | AAGGGGA-CA<br>TGTAGTAGTT<br>ACCT | CACTCCTCTT<br>TCCAAGCCCA | TGGGCCCTGT<br>GGACCGAGTC | -CTCTCCCAG<br>AGGGTGTGTT |
| MAM1_SP134 | CCCCAGGAGG<br>CTCTGCCCTC<br>CTAGATACCA | AAGGGGA-CA<br>TGTAGTAGTT<br>ACCT | CACTCCTCTT<br>TCCAAGCCCA | TGGGCCCTGT<br>GGACCGAGTC | -CTCTCCCAG<br>AGGGTGTGTT |
| MAST_B122_ | TCCCAGGAGG<br>CTCTG-CCTC<br>-TAGATACCA | AAGGGGACCA<br>TGTAGTAGTT<br>ACCT | CACTCCTCCT<br>TCCAAGCCCA | TTGGCCCTGT<br>GGACCGAGTC | CCTCT-CCAG<br>AGGGTGTGTT |
| SAV1_SE210 | CCCCAGGAGG<br>CTCTGCCCTC<br>CYAGATACCA | AAGGGGA-CA<br>TGTAGTAGTT<br>ACCT | CACTCCTCTT<br>TCCAAGCCCA | TGGGCCCTGT<br>GGACCGAGTC | -CTCTCCCAG<br>AGGGTGTGTT |

1 1 1 1 1  
5 111

|            |                                        |                               |                          |                          |                         |
|------------|----------------------------------------|-------------------------------|--------------------------|--------------------------|-------------------------|
| ASIAN2_Ema | CAAGCTTCTG<br>GAAGGTCAGT<br>AAAGGAAGGC | AGAAAGGTGC<br>GTGGCTACTC<br>T | TCTGGGCTCA<br>ACCTTAACCA | TTTTACAGGT<br>AGTAGTGAGG | GTCAGA-GCC<br>GATGAGGCC |
| FOR_DS1535 | CAAGCTTCTG<br>GAAGGTCAGT<br>AAAGGAAGGC | AGAAAGGTGC<br>GTGGCTACTC<br>T | TCTGGGCTCA<br>ACCTTAACCA | TTTTACAGGT<br>AGTAGTGAGG | GTCAGA-GCC<br>GATGAGGCC |
| MAM1_SP134 | CAAGCTTCTG<br>GAAGGTCAGT<br>AAAGGAAGGC | AGAAAGGTGC<br>GTGGCTACTC<br>T | TCTGGGCTCA<br>ACCTTAACCA | TTTTACAGGT<br>AGTAGTGAGG | GTCAGA-GCC<br>GATGAGGCC |
| MAST_B123_ | TAAGCTTCTG<br>GAAGATCAAT<br>AAAGGAAGGC | AGAAAGGTGC<br>ATAGCTACTC<br>T | TCTGGGCTCA<br>ACCTTAACCA | TTTTACAAAT<br>AGTAGTGAGG | ATCAAAAGCC<br>AATGAGGCC |
| SAV1_SE210 | CAAGCTTCTG<br>GAAGGTCAGT<br>AAAGGAAGGC | AGAAAGGTGC<br>GTGGCTACTC<br>T | TCTGGGCTCA<br>ACCTTAACCA | TTTTACAGGT<br>AGTAGTGAGG | GTCAGA-GCC<br>GATGAGGCC |

1 1 1 1 1  
5 111

|            |                                        |                               |                            |                          |                          |
|------------|----------------------------------------|-------------------------------|----------------------------|--------------------------|--------------------------|
| ASIAN2_Ema | AGACCTGAGC<br>GAGGCCTCAG<br>CAGGTCTAGT | TCACATCCTG<br>TTTCCACATC<br>T | GTTCTGCTAG<br>TGTA AAAATGC | CTCTAAGACA<br>AGGCAGTGAC | TAGGCAGCCT<br>CCCATCTTCA |
| FOR_DS1535 | AGACCTGAGC<br>GAGGCCTCAG<br>CAGGTCTAGT | TCACATCCTG<br>TTTCCACATC<br>T | GTTCTGCTAG<br>TGTA AAAATGC | CTCTAAGACA<br>AGGCAGTGAC | TAGGCAGCCT<br>CYCATCTTCA |
| MAM1_SP134 | AGACCTGAGC<br>GAGGCCTCAG<br>CAGGTCTAGT | TCACATCCTG<br>TTTCCACATC<br>T | GTTCTGCTAG<br>TGTA AAAATGC | CTCTAAGACA<br>AGGCAGTGAC | TAGGCAGCCT<br>CCCATCTTCA |
| MAST_B169_ | AGATCTGAGC<br>GAGGCCTCAG<br>CAAGTCTAGT | TCACATCCTG<br>TTTCCACATC<br>T | GTTCTGCTAG<br>TGTA AAAATGC | CTCTAAGACA<br>AGGCAGTGAC | TAGGCAGCAT<br>CCCATCTTCA |
| SAV1_SE210 | AGACCTGAGC<br>GAGGCCTCAG<br>CAGGTCTAGT | TCACATCCTG<br>TTTCCACATC<br>T | GTTCTGCTAG<br>TGTA AAAATGC | CTCTAAGACA<br>AGGCAGTGAC | TAGGCAGCCT<br>CCCATCTTCA |

1 1 1 1 1  
5 111

|            |                                        |                               |                          |                          |                          |
|------------|----------------------------------------|-------------------------------|--------------------------|--------------------------|--------------------------|
| ASIAN2_Ema | GCAA-GAGTC<br>GG-AGAAA-C<br>CCTATTCTTA | ATAGTCCTTG<br>AAA-GAAC-A<br>A | TAAGAGGAGA<br>AAA-TTGTCC | AACAGGTAAT<br>ATTGGGATGG | ATGACTTGTC<br>AATAGAAGAT |
| FOR_DS1535 | GCAA-GAGTC<br>GG-AGAAA-C<br>CCTATTCTTA | ATAGTCCTTG<br>AAA-GAAC-A<br>A | TAAGAGGAGA<br>AAA-TTGTCC | AACAGGTAAT<br>ATTGRGATGG | ATTACTTGTT<br>AATAGAAGAT |
| MAM1_SP134 | GCAA-GAGTC<br>GG-AGAAA-C<br>CCTATTCTTA | ATAGTCCTTG<br>AAA-GAAC-A<br>A | TAAGAGGAGA<br>AAA-TTGTCC | AACAGGTAAT<br>ATTGRGATGG | ATTACTTGTT<br>AATAGAAGAT |

|            |                                        |                               |                          |                          |                          |
|------------|----------------------------------------|-------------------------------|--------------------------|--------------------------|--------------------------|
|            | GG-AGAAA-C<br>CCTATTCCTA               | AAA-GAAC-A<br>A               | AAA-TTGTCC               | ATTGGGATGG               | AATAGAAGAT               |
| MAST_B170_ | GCAAAGAGTC<br>GGGAGAAAAC<br>CCTATTCCTA | ATAGTCCTTG<br>AAAAGAACCA<br>A | TAAGAGGAGA               | AACAGGTAAT<br>ATTGGGATGG | ATTACTTGTC<br>AGTAGAAAAT |
| SAV1_SE210 | GCAA-GAGTC<br>GG-AGAAA-C<br>SCTATTCCTA | ATAGTCCTTG<br>AAA-GAAC-A<br>A | TAAGAGGAGA<br>AAA-TTGTCC | AACAGGTAAT<br>ATTGGAATGG | ATGACTTGTC<br>AATAGAAGAT |

1 1 1 1 1  
5 111

|            |                                       |                                |                          |                          |                          |
|------------|---------------------------------------|--------------------------------|--------------------------|--------------------------|--------------------------|
| ASIAN2_Ema | TGTTCTAAG<br>CTGCCTYCCT<br>GGTCTTCTCA | CTAT-GCTTC<br>AGATTTTTTC-<br>G | TGGGGTCCCT<br>ACTCTGGATG | CAAACCTCTG<br>GAGGCAGAAT | TG-CATGATT<br>GTGAGGTGGG |
| FOR_DS1535 | TGTTCTAAG<br>CTGCCTCCCT<br>GGTCTTCTCA | CTAT-GCTTC<br>AGATTTTTTC-<br>G | TGGGGTCCCT<br>ACTCTGGATG | CAAACCTCTG<br>GAGGCAGAAT | TG-CATGATT<br>GTGAGGTGGG |
| MAM1_SP134 | TGTTCTAAG<br>CTGCCTCCCT<br>GGTCTTCTCA | CTAT-GCTTC<br>AGATTTTTTC-<br>G | KGGGGTCCCT<br>ACTCTGGATG | CAAACCTCTG<br>GAGGCAGAAT | TG-CATGATT<br>GTGAGGTGGG |
| MAST_B171_ | TGTTCTAAG<br>CTGCTTCCCT<br>GGTCTTCTCA | CTATCGCTTC<br>AGATTTTTTC<br>G  | TGGGGTCCCT<br>ACTCTGGATG | CAAACCTCTG<br>GAGGCAGAAT | TGTCATGATT<br>GTGAGGTGGA |
| SAV1_SE210 | TGTTCTAAG<br>CTGCCTCCCT<br>GGTCTTCTCA | CTAT-GCTTC<br>AGATTTTTTC-<br>G | TGGGGTCCCT<br>ACTCTGGATG | CAAACCTCTG<br>GAGGCAGAAT | TG-CATGATT<br>GTGAGGTGGG |

1 1 1 1 1  
5 111

|            |                                        |                               |                          |                          |                          |
|------------|----------------------------------------|-------------------------------|--------------------------|--------------------------|--------------------------|
| ASIAN2_Ema | TGTCTTAGAT<br>AAGTGAACCA<br>TTTAGACAGA | AACACTTCTG<br>AGGAGGGGCA<br>T | TTTCTGAGAA<br>GCTTGCCTGC | AGTGACCCAT<br>AGGGAAAACA | GACTGTTAGC<br>CTTAGTATAT |
| FOR_DS1535 | TGTCTTAGAT<br>AAGTGAACCA<br>TTTAGACAGA | AACACTTCTG<br>AGGAGGGGCA<br>T | TTTCTGAGAA<br>GCTTGCCTGC | AGTGACCCAT<br>AGGGAAAACA | GACTGTTAAC<br>CTTASTATAT |
| MAM1_SP134 | TGTCTTAGAT<br>AAGTGAACCA<br>TTTAGACAGA | AACACTTCTG<br>AGGAGGGGCA<br>T | TTTCTGAGAA<br>GCTTGCCTGC | AGTGACCCAT<br>AGGGAAAACA | GACTGTTAAC<br>CTTAGTATAT |
| MAST_B172_ | TGTCTTAGAT<br>AAGTGAACCA<br>TTTAGACAGA | AACACTTCTG<br>AGGAGGGGCA<br>T | TTTCTAAGAA<br>GCTTGCCTGC | AGTGACCCAT<br>AGAGAAAACA | GACTGTTAAC<br>CTTAATATAT |
| SAV1_SE210 | TGTCTTAGAT<br>AAGTGAACCA<br>TTTAGACAGA | AACACTTCTG<br>AGGAGGGGCA<br>T | TTTCTGAGAA<br>GCTTGCCTGC | AGTGACCCAT<br>AGGGAAAACA | GACTGTTAAC<br>CTTACTATAT |

1 1 1 1 1  
5 111

|            |                                        |                               |                          |                          |                          |
|------------|----------------------------------------|-------------------------------|--------------------------|--------------------------|--------------------------|
| ASIAN2_Ema | CCAAAGACGC<br>CTGGAGGAAA<br>AAAA-GCCCA | CTGTTCCAGC<br>CACTTGGCCA<br>G | TGCAAGGAGG<br>CTCAAAGGTA | TCAGCATTCC<br>GACCAGGATG | AAGGGGAGAG<br>AAGGA-GAAA |
| FOR_DS1535 | CCAAAGACGC<br>CTGGAGGAAA<br>AAAA-GCCCA | CTGTTCCAGC<br>CACTTGGCCA<br>G | TGCAAGGAGG<br>CTCAAAGGTA | TCAGCATTCC<br>GACCGGGATG | AAGGGGAGAG<br>AAGGA-GAAA |
| MAM1_SP134 | CCAAAGACGC<br>CTGGAGGAAA<br>AAAA-GCCCA | CTGTTCCAGC<br>CACTTGGCCA<br>G | TGCAAGGAGG<br>CTCAAAGGTA | TCAGCATTCC<br>GACCAGGATG | AAGGGGAGAG<br>AAGGA-GAAA |
| MAST_B126_ | CTAAAGATGC<br>CTGGAGAAAA<br>AAAAAGCCCA | CTGTTCCAGC<br>CACTTGGCCA<br>A | TGCAAGGAGG<br>CTCAAAGGTA | TCAGCATTCC<br>GACCAGGATG | AAGGGGAGAG<br>AAGGAAGAAA |
| SAV1_SE210 | CCAAAGACGC<br>CTGGAGGAAA<br>AAAA-GCCCA | CTGTTCCAGC<br>CACTTGGCCA<br>G | TGCAAGGAGG<br>CTCAAAGGTA | TCAGCATTCC<br>GACTGGGATG | AAGGGGAGAG<br>AAGGA-GAAA |

1 1 1 1 1  
5 110

|            |                          |                          |                          |                          |                          |
|------------|--------------------------|--------------------------|--------------------------|--------------------------|--------------------------|
| ASIAN2_Ema | GTCCTTGAGC<br>TCACAAGGAC | ATAGAGAATG<br>ACATCAACTG | TGATTCAGCT<br>GGCCCTGAGA | GGAGATGGGC<br>TATAAAGACA | TCACAAGGAC<br>ATACCTAGGA |
|------------|--------------------------|--------------------------|--------------------------|--------------------------|--------------------------|



|            |                                                      |                          |                          |                          |                          |
|------------|------------------------------------------------------|--------------------------|--------------------------|--------------------------|--------------------------|
| FOR_DS1535 | CAACCTTGGA<br>GTCCTTGAGC<br>TCACAAGGAC<br>CAACCTTGGA | ATAGAGAATG<br>ACATCAACTG | TGATCCAGCT<br>GGCCCTGAGA | GGAGATGGGC<br>TATAAAGACA | TCACAAGGAC<br>ATACCTAGGA |
| MAM1_SP134 | GTCCTTGAGC<br>TCACAAGGAC<br>CAACCTTGGA               | ATAGAGAATG<br>ACATCAACTG | TGATTCAGCT<br>GGCCCTGAGA | GGAGATGGGC<br>TATAAAGACA | TCACAAGGAC<br>ATACCTAGGA |
| MAST_B174_ | GTCCTTGAGC<br>TCACAAGGAC<br>CAACCTTGGA               | ATAGAGAATG<br>ACATCAACTG | TGATCCAGCT<br>GGCCCTGAGA | GGAGATGGGC<br>TATAAAGACA | TCACAAGGAC<br>ATACCTAGGA |
| SAV1_SE210 | GTCCTTGAGC<br>TCACAAGGAC<br>CAACCTTGGA               | ATAGAGAATG<br>ACATCAACTG | TGATCCAGCT<br>GGCCCTGAGA | GGAGATGGGC<br>TATAAAGACA | TCACAAGGAC<br>ATACCTAGGA |

1 1 1 1 1  
5 110

|            |                                        |                          |                          |                          |                          |
|------------|----------------------------------------|--------------------------|--------------------------|--------------------------|--------------------------|
| ASIAN2_Ema | TTCATYCTCT<br>ATACAGACAA<br>CAAGGCAGGC | TCTTATTAAC<br>ACACTTCTAA | CCCTTCCTCC<br>TAGGAAGATA | TTCCATGCCT<br>CATGTCCTAC | TC-ATAGARG<br>TCATTATAAA |
| FOR_DS1535 | TTCATCCTCT<br>ATACAGACAA<br>CAAGGCAGGC | TCTTATTAAC<br>ACACTTCTAA | CCCTTCCTCC<br>TAGTAAGATA | TTCCATGCCT<br>CATGTCCTAC | TC-ATAGAGG<br>TCATTATAAA |
| MAM1_SP134 | TTCATTCTCT<br>ATACAGACAA<br>CAAGGCAGGC | TCTTATTAAC<br>ACACTTCTAA | CCCTTCCTCC<br>TAGGAAGATA | TTCCATGCCT<br>CATGTCCTAC | TC-ATAGAGG<br>TCATTATAAA |
| MAST_B175_ | TTCATCCTCT<br>ATACAGACAA<br>CAAGGCAGGC | TCTTATTAAC<br>ACACTTCTAA | CCCTTCCTCC<br>TAGGAAGATA | TTCCATGCCT<br>CATGTCCTAC | TCCATAGAGG<br>TCATTATAAA |
| SAV1_SE210 | TTCATCCTCT<br>ATACAGACAA<br>CAAGGCAGGC | TCTTATTAAC<br>ACACTTCTAA | CCCTTCCTCC<br>TAGTAAGATA | TTCCATGCCT<br>CATGTCCTAC | TC-ATAGAGG<br>TCATTATAAA |

1 1 1 1 1  
5 110

|            |                                        |                          |                          |                          |                          |
|------------|----------------------------------------|--------------------------|--------------------------|--------------------------|--------------------------|
| ASIAN2_Ema | TGCTTTGCAT<br>GTTAGCTAAG<br>TGTCTTGGGG | ACAGAGTATA<br>CTCCTGCCTC | TTTCCCAATA<br>TCCCCTTTAT | GTTGAAGAGA<br>GGTCTCACAC | AAAGGCAGCA<br>AGAAGTTACC |
| FOR_DS1535 | TGCTTTGCAT<br>GTTAGCTAAG<br>TGTCTTRGGG | ACAGAGTATA<br>CTCCTGCCTC | TTTCCCAATA<br>TCCCCTTTAT | GTTGAAGAGA<br>GGTCTCACAC | AAAGGCAGCA<br>AGAAGTTACC |
| MAM1_SP134 | TGCTTTGCAT<br>GTTAGCTAAG<br>TGTMTTGGGG | ACAGAGTATA<br>CTCCTGCCTC | TTTCCCAATA<br>TCCCCTTTAT | GTTGAAGAGA<br>GATCTCACAC | AAAGGCAGCA<br>AGAAGTTACC |
| MAST_B176_ | TGTTTTTCAT<br>GTTAGCTAAG<br>TGTCTTGGGA | ACAGAGTATA<br>CCCCTGCCTC | TTTCCCAATA<br>TCCCCTTTAT | GTTGAAGAGA<br>GGTCTCACAC | AAAGGCAGCA<br>AGAAGTTACC |
| SAV1_SE210 | TGCTTTGCAT<br>GTTAGCTAAG<br>TGTCTTGGGG | ACAGAGTATA<br>CTCCTGCCTC | TTTCCCAATA<br>TCCCCTTTAT | GTTGAAGAGA<br>GGTCTCACAC | AAAGGCAGCA<br>AGAAGTTACC |

1 1 1 1 1  
5 115

|            |                                        |                                   |                          |                          |                          |
|------------|----------------------------------------|-----------------------------------|--------------------------|--------------------------|--------------------------|
| ASIAN2_Ema | TT-----<br>ACCTGCTGGA<br>CTCTAAAAGA    | --CAT-GTTT<br>AAACAGTTTG<br>ATGGG | GCAGCATTTT<br>ATTCCATCTT | TTCTCATCTT<br>TACTATCTTC | TC-ATCCCCT<br>CTGAGTCCAT |
| FOR_DS1535 | TT-----<br>ACCTGCTGGA<br>CTCTAAAAGA    | --CAT-GTTT<br>AAACAGTTTG<br>ATGGG | GCAGCATTTT<br>ATTCCATCTT | TTCTCATCTT<br>TACTATCTTC | TC-ATCCCCT<br>CTGAGTCCAT |
| MAM1_SP134 | TT-----<br>ACCTGCTGGA<br>CTCTAAAAGA    | --CAT-GTTT<br>AAACAGTTTG<br>ATGGG | GCAGCATTTT<br>ATTCCATCTT | TTCTCATCTT<br>TACTATCTTC | TC-ATCCCCT<br>CTGAGTCCAT |
| MAST_B130_ | TTAGAAAAAG<br>ACCTGCTGGA<br>CTCTAAAAGA | AGTATACTTT<br>AAACAGTTTG<br>ATGGT | GCAGCA-TTC<br>ATT-CA-CCT | TTCTCATCTT<br>TACTAT-TTC | TCTATCCCCT<br>CTGAGT-CAT |
| SAV1_SE210 | TT-----<br>ACCTGCTGGA<br>CTCTAAAAGA    | --CAT-GTTT<br>AAACAGTTTG<br>ATGGG | GCAGCATTTT<br>ATTCCATCTT | TTCTCATCTT<br>TACTATCTTC | TC-ATCCCCT<br>CTGAGTCCAT |

1 1 1 1 1  
5 110

|            |                                        |                          |                          |                          |                          |
|------------|----------------------------------------|--------------------------|--------------------------|--------------------------|--------------------------|
| ASIAN2_Ema | TGTGCACACT<br>TT-CACTTGT<br>AAGACCAAGT | GGGGACAAAG<br>CACGCACTTT | CCAGTGATCT<br>GGTTTACGTA | TCCCCCAGAG<br>CATCGGGAGC | CACTTTTT-G<br>GAGGACAGAA |
| FOR_DS1535 | TGTGCACACT<br>TT-CACTTGG<br>AAGACCAAGT | GGGGACAAAG<br>CACGCACTTT | CCAGTGATCT<br>GGTTTACGTA | TCCCCCAGAG<br>CATCGGGAGC | CACTTTTT-G<br>GAGGACAGAA |
| MAM1_SP134 | TGTGCACACT<br>TT-CACTTGT<br>AAGACCAAGT | GGGGACAAAG<br>CACGCACTTT | CCAGTGATCT<br>GGTTTACGTA | TCCCCCAGAG<br>CATCGGGAGC | CACTTTTT-G<br>GAGGACAGAA |
| MAST_B178_ | GTGCACACTG<br>TTTCACTTAT<br>AAGACCAAGT | GGGACAAAAG<br>CACGCACTTT | CCAGTGATCT<br>GGTTTACGTA | TCCCCCAGAG<br>CATCGGGAGC | CACTTTTTTG<br>GAGGACAGAA |
| SAV1_SE210 | TGTGCACACT<br>TT-CACTTGG<br>AAGACCAAGT | GGGGACAAAG<br>CACGCACTTT | CCAGTGATCT<br>GGTTTACGTA | TCCCCCAGAG<br>CATCGGGAGC | CACTTTTT-G<br>GAGGACAGAA |

1 1 1 1 1  
5 110

|            |                                        |                          |                          |                          |                          |
|------------|----------------------------------------|--------------------------|--------------------------|--------------------------|--------------------------|
| ASIAN2_Ema | TGTAGGCTCT<br>GGAGCTCGGT<br>GACTCACCTG | ATGAAGGGAG<br>GTTGGGGTGC | CGAGGAGGCT<br>CAATTAGGCC | GGGCACGGTG<br>ATCGGCACCC | AGCTGTTGGG<br>ACTTCCGATG |
| FOR_DS1535 | TGTAGGCTCT<br>GGAGCTYGGT<br>GACTCACCTG | ATGAAGGGAG<br>GTTGGGGTGC | CGAGGAGGCT<br>CAATTAGGCC | GGGCACGGTG<br>ATCGGCACCC | AGCTGTTGGG<br>ACTTCCGATG |
| MAM1_SP134 | TGTAGGCTCT<br>GGAGCTCGGT<br>GACTCACCTG | ATGAAGGGAG<br>GTTGGGGTGC | CGAGGAGGCT<br>CAATTAGGCC | GGGCACGGTG<br>ATCGGCACCC | AGCTGTTGGG<br>ACTTCCGATG |
| MAST_B179_ | TGTAGGCTCT<br>GGAGCTCGGT<br>GACTCACCTG | ATGAAGGGAG<br>GTTGGGGTGC | GGAGGAGGCT<br>CAATTAGGCC | GGGCACGGTG<br>ATCGGCACCC | AGCTGTTGGG<br>ACTTCTGATG |
| SAV1_SE210 | TGTAGGCTCT<br>GGAGCTCGGT<br>GACTCACCTG | ATGAAGGGAG<br>GTTGGGGTGC | CGAGGAGGCT<br>CAATTAGGCC | GGGCACGGTG<br>ATCGGCACCC | AGCTGTTGGG<br>ACTTCCGATG |

1 1 1 1 1  
5 110

|            |                                        |                          |                          |                        |                          |
|------------|----------------------------------------|--------------------------|--------------------------|------------------------|--------------------------|
| ASIAN2_Ema | AAAGTGAAA-<br>TTTGCTGAGC<br>AACAGAACGG | TGAATGTGTG<br>ACCCCTTACG | AGGCTATTCC<br>CAGTAGACCT | TACTCATT<br>GTGTGGGGTG | CACCAAA-TG<br>CTGGAGACAC |
| FOR_DS1535 | AAAGTGAAA-<br>TTTGCTGAGC<br>AACAGAACGG | TGAATGTGTG<br>GCCCTTACG  | AGGCTATTCC<br>CAGTAGACCT | TACTCATT<br>GTGTGGGGTG | CACCAAA-TG<br>CTGGAGACAC |
| MAM1_SP134 | AAAGTGAAA-<br>TTTGCTGAGC<br>AACAGAACGG | TGAATGTGTG<br>GCCCTTACG  | AGGCTATTCC<br>CAGTAGACCT | TACTCATT<br>GTGTGGGGTG | CACCAAA-TG<br>CTGGAGACAC |
| MAST_B180_ | AAAGTGAAA<br>TTTGCTGAGC<br>AACAGAACGA  | TGAATGTGTG<br>GCCCTTACG  | AGGCTATTCC<br>CAGTAGACCT | TACTCATT<br>GTGTGGGGTG | CACCAAAATG<br>CTGGAGACAC |
| SAV1_SE210 | AAAGTGAAA-<br>TTTGCTGAGC<br>AACAGAACGG | TGAATGTGTG<br>GCCCTTACG  | AGGCTATTCC<br>CAGTAGACCT | TACTCCTT<br>GTGTGGGGTG | CACCAAA-TG<br>CTGGAGACAC |

1 1 1 1 1  
5 109

|            |                                       |                          |                          |                          |                          |
|------------|---------------------------------------|--------------------------|--------------------------|--------------------------|--------------------------|
| ASIAN2_Ema | GGAAAATGCA<br>GAGCTGGGCT<br>GTCCAGAAA | AATGYTTCCC<br>CATCCAAGAA | TGAAACAGAG<br>CCCAAATACA | GTGCTTAGGG<br>GAGGCAAGGT | GGAAGGAGAG<br>GGACAGAAAA |
| FOR_DS1535 | GGAAAATGCA<br>GAGCTGGGCT<br>GTCCAGAAA | AATGTTTCCC<br>CATCCAAGAA | TGAAACAGAG<br>CCCAAATACA | GTGCTTAGGG<br>GAGGCAAGGT | GGAAGGAGAG<br>GGACAGAAAA |
| MAM1_SP134 | GGAAAATGCA<br>GAGCTGGGCT<br>GTCCAGAAA | AATGTTTCCC<br>CATCCAAGAA | TGAAACAGAG<br>CCCAAATACA | GTGCTTAGGG<br>GAGGCAAGGT | GGAAGGAGAG<br>GGACAGAAAA |
| MAST_B135_ | GGAAAATGCA<br>AAGCTGGGCT              | AATGTTTCTT<br>CATCCAAGAA | TGAAATAGAG<br>CCCAAATACA | GTGCTTAGGG<br>GAGGCAAGGT | GGAAGGAGAG<br>GGACAGAAAA |

|            |                                                    |                          |                          |                          |                          |
|------------|----------------------------------------------------|--------------------------|--------------------------|--------------------------|--------------------------|
| SAV1_SE210 | ATCCAAAAA<br>GGAAAATGCA<br>GAGCTGGGCT<br>GTCCAGAAA | AATGTTTTCC<br>CATCCAAGAA | TGAAACAGAG<br>CCCAAATACA | GTGCTTAGGG<br>GAGGCAAGGT | GGAAGGAGAG<br>GGACAGAAAA |
|------------|----------------------------------------------------|--------------------------|--------------------------|--------------------------|--------------------------|

1 1 1 1 1  
5 109

|            |                                       |                          |                          |                          |                          |
|------------|---------------------------------------|--------------------------|--------------------------|--------------------------|--------------------------|
| ASIAN2_Ema | GAGAAACCAA<br>TATCAACCCT<br>ACCTGGTAG | AA-CC--AAA<br>ATCGGACAGA | CCC-GTTGCC<br>TTMGAAGTGT | CTCAAGTCAA<br>CCGTAGGGTT | TTCTGACTCA<br>TCCAAGGAGC |
|------------|---------------------------------------|--------------------------|--------------------------|--------------------------|--------------------------|

|            |                                       |                          |                          |                          |                          |
|------------|---------------------------------------|--------------------------|--------------------------|--------------------------|--------------------------|
| FOR_DS1535 | GAGAAACCAA<br>TATCAACCCT<br>ACCTGGTAG | AA-CC--AAA<br>ATCGGACAGA | CCC-GTTGCC<br>TTAGAAGTGT | CTCAAGTCAA<br>CCRTAGGGTT | TTCTGACTCA<br>TCCAAGGAGC |
|------------|---------------------------------------|--------------------------|--------------------------|--------------------------|--------------------------|

|            |                                       |                          |                          |                          |                          |
|------------|---------------------------------------|--------------------------|--------------------------|--------------------------|--------------------------|
| MAM1_SP134 | GAGAAACCAA<br>TATCAACCCT<br>ACCTGGTAG | AA-CC--AAA<br>ATCGGACAGA | CCC-GTTGCC<br>TTAGAAGTGT | CTCAAGTCAA<br>CCGTAGGGTT | TTCTGACTCA<br>TCCAAGGAGC |
|------------|---------------------------------------|--------------------------|--------------------------|--------------------------|--------------------------|

|            |                                       |                          |                          |                          |                          |
|------------|---------------------------------------|--------------------------|--------------------------|--------------------------|--------------------------|
| MAST_B181_ | AGAAAACCAA<br>TATCGACCTT<br>ACCTGATAA | AAACCCGAAA<br>ATCGGACAGA | CCCCTTTGCC<br>TTAGAAGTGT | CTCAAGTCGA<br>CCGTAGGGTT | TTCTGACTCA<br>TCCAAGGAGC |
|------------|---------------------------------------|--------------------------|--------------------------|--------------------------|--------------------------|

|            |                                       |                          |                          |                          |                          |
|------------|---------------------------------------|--------------------------|--------------------------|--------------------------|--------------------------|
| SAV1_SE210 | GAGAAACCAA<br>TATCAACCCT<br>ACCTGGTAG | AA-CC--AAA<br>ATCGGACAGA | CCC-GTTGCC<br>TTAGAAGTGT | CTCAAGTCAA<br>CCATAGGGTT | TTCTGACTCA<br>TCCAAGGAGC |
|------------|---------------------------------------|--------------------------|--------------------------|--------------------------|--------------------------|

1 1 1 1 1  
5 111

|            |                                        |                               |                          |                          |                          |
|------------|----------------------------------------|-------------------------------|--------------------------|--------------------------|--------------------------|
| ASIAN2_Ema | CAAAAAAGGA<br>TGGGCATGTA<br>TGGCTGCAGT | CCTGTGGGTT<br>GAAAAGTATG<br>C | TCCAGGTGGA<br>AACACACAAG | GGTATGGCAG<br>AGGGTGGTGG | AAAGGCTTTC<br>TTTTGGGGAA |
|------------|----------------------------------------|-------------------------------|--------------------------|--------------------------|--------------------------|

|            |                                        |                               |                          |                          |                          |
|------------|----------------------------------------|-------------------------------|--------------------------|--------------------------|--------------------------|
| FOR_DS1535 | CAAAAAAGGA<br>TGGGCATGTA<br>TGGCTGCAGT | CCTGTGGGTT<br>GAAAAGTATG<br>C | TCCAGGTGGA<br>AACACACAAG | GGTATGGCAG<br>AGGGTGGTGG | AAAGGCTTTC<br>TTTTGGGGAA |
|------------|----------------------------------------|-------------------------------|--------------------------|--------------------------|--------------------------|

|            |                                        |                               |                          |                          |                          |
|------------|----------------------------------------|-------------------------------|--------------------------|--------------------------|--------------------------|
| MAM1_SP134 | CAAAAAAGGA<br>TGGGCATGTA<br>TGGCTGCAGT | CCTGTGGGTT<br>GAAAAGTATG<br>C | TCCAGGTGGA<br>AACACACAAG | GGTATGGCAG<br>AGGGTGGTGG | AAAGGCTTTC<br>TTTTGGGGAA |
|------------|----------------------------------------|-------------------------------|--------------------------|--------------------------|--------------------------|

|            |                                        |                               |                          |                          |                          |
|------------|----------------------------------------|-------------------------------|--------------------------|--------------------------|--------------------------|
| MAST_B184_ | CAAAAAATGA<br>TGGGCATGTA<br>TGGTT-CAGT | TTTGTGGGTT<br>GAAAAGTATG<br>C | TTTAGGTGGA<br>AACACACAAG | GGTATGGCAG<br>AGGGTGGTGG | AAAGGCTTTC<br>TTTTGGG-AA |
|------------|----------------------------------------|-------------------------------|--------------------------|--------------------------|--------------------------|

|            |                                        |                               |                          |                          |                          |
|------------|----------------------------------------|-------------------------------|--------------------------|--------------------------|--------------------------|
| SAV1_SE210 | CAAAAAAGGA<br>TGGGCATGTA<br>TGGCTGCAGT | CCTGTGGGTT<br>GAAAAGTATG<br>C | TCCAGGTGGA<br>AACACRCAAG | GGTATGGCAG<br>AGGGTGGTGG | AAAGGCTTTC<br>TTTTGGGGAA |
|------------|----------------------------------------|-------------------------------|--------------------------|--------------------------|--------------------------|

1 1 1 1 1  
5 113

|            |                                       |                                 |                          |                         |                           |
|------------|---------------------------------------|---------------------------------|--------------------------|-------------------------|---------------------------|
| ASIAN2_Ema | -TTTTTTTTT<br>GCTCTAGACC<br>TTCCAGATC | TTTAGCATAG<br>TAAAGAATCA<br>GTA | TTACCAGGAA<br>ATTCCCCCAT | CATCGGTGGT<br>TCCCCTCCT | GACTION-CA<br>GCCCCACTGTC |
|------------|---------------------------------------|---------------------------------|--------------------------|-------------------------|---------------------------|

|            |                                       |                                 |                          |                         |                           |
|------------|---------------------------------------|---------------------------------|--------------------------|-------------------------|---------------------------|
| FOR_DS1535 | --TTTTTTTT<br>GCTCTAGACC<br>TTCCAGATC | TTTAGCATAG<br>TAAAGAATCA<br>GTA | TTACCAGGAA<br>ATTCCCCCAT | CATCGGTGGT<br>TCCCCTCCT | GACTION-CA<br>RCCCCACTGTC |
|------------|---------------------------------------|---------------------------------|--------------------------|-------------------------|---------------------------|

|            |                                       |                                 |                          |                         |                           |
|------------|---------------------------------------|---------------------------------|--------------------------|-------------------------|---------------------------|
| MAM1_SP134 | TTTTTTTTTT<br>GCTCTAGACC<br>TTCCAGATC | TTTAGCATAG<br>TAAAGAATCA<br>ATA | TTACCAGGAA<br>ATTCCCCCAT | CATCGGTGGT<br>TCCCCTCCT | GACTION-CA<br>GCCCCACTGTC |
|------------|---------------------------------------|---------------------------------|--------------------------|-------------------------|---------------------------|

|            |                                       |                                 |                          |                         |                           |
|------------|---------------------------------------|---------------------------------|--------------------------|-------------------------|---------------------------|
| MAST_B137_ | TTTTTTTTTT<br>GCTCTAGACC<br>TTCCAAATC | TTTAGCATAG<br>TAAAGAATCA<br>GTA | TTACCAGGAA<br>ATTCCCCCAT | CATCGGTGGT<br>TCCCCTCCT | GACTION-CA<br>GCCCCACTGTC |
|------------|---------------------------------------|---------------------------------|--------------------------|-------------------------|---------------------------|

|            |                                       |                                 |                          |                         |                           |
|------------|---------------------------------------|---------------------------------|--------------------------|-------------------------|---------------------------|
| SAV1_SE210 | -TTTTTTTTT<br>GCTCTAGACC<br>TTCCAGATC | TTTAGCATAG<br>TAAAGAATCA<br>GTA | TTACCAGGAA<br>ATTCCCCCAT | CATCGGTGGT<br>TCCCCTCCT | GACTION-CA<br>GCCCCACTGTC |
|------------|---------------------------------------|---------------------------------|--------------------------|-------------------------|---------------------------|

1 1 1 1 1  
5 110

|            |                                        |                          |                          |                          |                          |
|------------|----------------------------------------|--------------------------|--------------------------|--------------------------|--------------------------|
| ASIAN2_Ema | GGGAGATACC<br>GCTTGGGGCT<br>GCTTTCCAGA | TCACCACTTG<br>TTAGCACAGA | GGGGCTGGTG<br>TGTGGGGCCC | AAGAGAGGGT<br>TCTAGGTCGG | CTGAGAAGAG<br>GGACCACTTA |
|------------|----------------------------------------|--------------------------|--------------------------|--------------------------|--------------------------|

|            |                                        |                          |                          |                          |                          |
|------------|----------------------------------------|--------------------------|--------------------------|--------------------------|--------------------------|
| FOR_DS1535 | GGGAGATACC<br>GCTTGGGGCT<br>GCTTTCCAGA | TCACCACTTG<br>TTAGCACAGA | GGGGCTGGTG<br>TGTGGGGCCC | AAGAGAGGGT<br>TCTAGGTCGG | CTGAGAAGAG<br>GGACCACTTA |
|------------|----------------------------------------|--------------------------|--------------------------|--------------------------|--------------------------|

|            |                                        |                          |                          |                          |                          |
|------------|----------------------------------------|--------------------------|--------------------------|--------------------------|--------------------------|
| MAM1_SP134 | GGGAGATACC<br>GCTTGGGGCT<br>GCTTTCCAGA | TCACCACTTG<br>TTAGCACAGA | GGGGCTGGTG<br>TGTGGGGCCC | AAGAGAGGGT<br>TCTAGGTCGG | CTGAGAAGAG<br>GGACCACTTA |
| MAST_B139_ | GGGAGATACC<br>GCTTGGGGCT<br>GCTTTCCAGA | TCACCACTTG<br>TTAGCACAGA | GGG-CTGGTG<br>TGTGGGGCCC | AAGAGAGGGT<br>TCTAGGTCGG | CTGAGAAGAG<br>GGACCACTTA |
| SAV1_SE210 | GGGAGATACC<br>GCTTGGGGCT<br>GCTTTCCAGA | TCACCACTTG<br>TTAGCACAGA | GGGGCTGGTG<br>TGTGGGGCCC | AAGAGAGGGT<br>TCTAGGTCGG | CTGAGAAGAG<br>GGACCACTTA |

1 1 1 1 1  
5 108

|            |                                      |                          |                          |                          |                          |
|------------|--------------------------------------|--------------------------|--------------------------|--------------------------|--------------------------|
| ASIAN2_Ema | GTTTCAACCT<br>AGCTCYGTGG<br>GGCCTAAT | TTAGTTAGAA<br>GATGGAGACC | AAGATGTGCT<br>TGGAGTCTTG | AGCTTAGAAG<br>CCTGATGTCA | AAAACATTCC<br>AACCCCTTGA |
| FOR_DS1535 | GTTTCAACCT<br>AGCTCCGTGG<br>GGCCTAAT | TTAGTTAGAA<br>GATGGAGACC | AAGATGTGCT<br>TGGAGTCTTG | AGCTTAGAAG<br>CCTGATGTCA | AAAACATTCC<br>AACCCCTTGA |
| MAM1_SP134 | GTTTCAACCT<br>AGCTCCGTGG<br>GGCCTAAT | TTAGTTAGAA<br>GATGGAGACC | AAGATGTGCT<br>TGGAGTCTTG | AGCTTAGAAG<br>CCTGATGTCA | AAAACATTCC<br>AACCCCTTGA |
| MAST_B140_ | GTTTCAACCT<br>AGCTCCGTGG<br>GGCCTAAT | TTAGTCAGAA<br>GATGGAGACC | AAGATGTGCT<br>TGGAGTCTTG | AGCTTAGAAG<br>CCTGATGTCA | AAAACATTCC<br>AACCCCTTGA |
| SAV1_SE210 | GTTTCAACCT<br>AGCTCCGTGG<br>GGCCTAAT | TTAGTTAGAA<br>GATGGAGACC | AAGATGTGCT<br>TGGAGTCTTG | AGCTTAGAAG<br>CCTGATGTCA | AAAACATTCC<br>AACCCCTTGA |

1 1 1 1 1  
5 108

|            |                                      |                          |                          |                          |                          |
|------------|--------------------------------------|--------------------------|--------------------------|--------------------------|--------------------------|
| ASIAN2_Ema | ACATGAAAGA<br>TATGCAATTA<br>TACCTTAA | AGATTTACAA<br>ATGA-TC-TT | CCCAGATTTA<br>CCCTATATGA | AATGCAGGA-<br>TACTTCA-TT | TTCTGTA-TA<br>TTGGCTTCTT |
| FOR_DS1535 | ACATGAAAGA<br>TATGCAATTA<br>TACCTTAA | AGATTTACAA<br>ATGA-TC-TT | CCCAGATTTA<br>CCCTATATGA | AATGCAGGA-<br>TACTTCA-TT | TTCTGTA-TA<br>TTGGCTTCTT |
| MAM1_SP134 | ACATGAAAGA<br>TATGCAATTA<br>TACCTTAA | AGATTTACAA<br>ATGA-TC-TT | CCCAGATTTA<br>CCCTATATGA | AATGCAGGA-<br>TACTTCA-TT | TTCTGTA-TA<br>TTGGCTTCTT |
| MAST_B188_ | ACAAGAAAGA<br>TATGCAATTA<br>TACCTTAA | AGATTTACAA<br>ATGAATCGTT | CCCAGATTTA<br>CCCTATATGA | AATGCAGGAG<br>TACTTCAGTT | TTCTGTACTA<br>TTGGCTTCTT |
| SAV1_SE210 | ACATGAAAGA<br>TATGCAATTA<br>TACCTTAA | AGATTTACAA<br>ATGA-TC-TT | CCCAGATTTA<br>CCCTATATGA | AATGCAGGA-<br>TACTTCA-TT | TTCTGTA-TA<br>TTGGCTTCTT |

1 1 1 1 1  
5 108

|            |                                      |                          |                          |                          |                          |
|------------|--------------------------------------|--------------------------|--------------------------|--------------------------|--------------------------|
| ASIAN2_Ema | TGCCCTGTTT<br>CCAGTTTATC<br>GTCCTGTC | GGGCCCTGGT<br>CTTTCCTGGA | CATCCATTAT<br>GTCTCACCTT | GGGTCTCCCT<br>GCCTCTAGCC | GTGTTGGAGG<br>CTGGAAC-TG |
| FOR_DS1535 | TGCCCTGTTT<br>CCASTTTATC<br>GTCCTGTC | GGGCCCTGGT<br>CTTTCCTGGA | CATCCATTAT<br>GTCTCACCTT | GGGTCTCCCT<br>GCCTCTAGCC | GTGTTGGAGG<br>CTGGAAC-TG |
| MAM1_SP134 | TGCCCTGTTT<br>CCAGTTTATC<br>GTCCTGTC | GGGCCCTGGT<br>CTTTCCTGGA | CATCCATTAT<br>GTCTCACCTT | GGGTCTCCCT<br>GCCTCTAGCC | GTGTTGGAGG<br>CTGGAAC-TG |
| MAST_B141_ | TGCCCTGTTT<br>CCACTTTATC<br>GTCCTATC | GGGCCCTGGT<br>CTTTTCTGGA | CAACCACTAT<br>GTCTCACCTT | GGGTCTCCCT<br>GCCTCTAGCC | GTGTTGGAGG<br>CTGGAACGTG |
| SAV1_SE210 | TGCCCTGTTT<br>CCASTTTATC<br>GTCCTGTC | GGGCCCTGGT<br>CTTTCCTGGA | CATCCATTAT<br>GTCTCACCTT | GGGTCTCCCT<br>GCCTCTAGCC | GTGTTGGAGG<br>CTGGAAC-TG |

1 1 1 1 1  
5 108

|            |            |            |            |             |            |
|------------|------------|------------|------------|-------------|------------|
| ASIAN2_Ema | TGCAAAATTC | TATCATTTGA | TCTCTGGCAT | TGTTTTCTATC | ACCAAGGCCA |
|------------|------------|------------|------------|-------------|------------|

|            |            |            |            |            |            |
|------------|------------|------------|------------|------------|------------|
|            | TATTTTCCAA | CTACCCATCC | TTCTTCTTTG | TTTCCAACCT | TTGCATTCCA |
|            | ATCACCAG   |            |            |            |            |
| FOR_DS1535 | TGCAAAATTC | TATCATTGGA | TCTCTGGCAT | TGTTTCTATC | ACCAAGGCCA |
|            | TATTTTCCAA | CTACCCATCC | TTCTTCTTTG | TTTCCAACCT | TTGCATTCCA |
|            | ATCACCAG   |            |            |            |            |
| MAM1_SP134 | TGCAAAATTC | TATCATTGGA | TCTCTGGCAT | TGTTTCTATC | ACCAAGGCCA |
|            | TATTTTCCAA | CTACCCATCC | TTCTTCTTTG | TTTCCAACCT | TTGCATTCCA |
|            | ATCACCAG   |            |            |            |            |
| MAST_B143_ | TGCAAAATTC | TATCCTGTGA | TCTCTGGCAT | TGTTTCTATC | ACCAAGGCCA |
|            | TATTTTCCAG | CTACCAATCC | TTCTTCTTTG | TTTCCAACCT | TTGCATTCCA |
|            | ATCACCAA   |            |            |            |            |
| SAV1_SE210 | TGCAAAATTC | TATCATTGGA | TCTCTGGCAT | TGTTTCTATC | ACCAAGGCCA |
|            | TATTTTCCAA | CTACCCATCC | TTCTTCTTTG | TTTCCAACCT | TTGCATTCCA |
|            | ATCACCAG   |            |            |            |            |

1 1 1 1 1  
5 112

|            |            |            |            |            |            |
|------------|------------|------------|------------|------------|------------|
| ASIAN2_Ema | CAAGATAAAG | AATTACCCGT | TAAACAGTA- | TTTGAGGAAT | GTT-GGTCAT |
|            | TGTGACACTG | GGGTCGTTTT | TAAAATCACT | CACAAGGCGT | CAGTCTTCAT |
|            | AATAATTGGC | TC         |            |            |            |
| FOR_DS1535 | CAAGATAAAG | AATTACCCGT | TAAACAGTA- | TTTGAGGAAT | GTT-GGTCAT |
|            | TGTGACACTG | GGGTCGTTTT | TAAAATCACT | CACAAGGCGT | CAGTCTTCAT |
|            | AATAATTGGC | TC         |            |            |            |
| MAM1_SP134 | CAAAATAAAG | AATTACCCAT | TAAACAGTA- | TTTGAGGAAT | GTT-GGTCAT |
|            | TGTGACACTG | GGGTAGTTTT | TAAAATCACT | CACAAGGCGT | CAGTCTTCAT |
|            | AATAATTGGC | TC         |            |            |            |
| MAST_B189_ | TAAGATAAAG | AATTACCCGT | TAAACAGTAC | TTTGAGGAAT | GTTTGGTCAT |
|            | TGTGACACTG | GGGTCGTTTT | TAAAATCAC- | ---AAGGCGT | CAGTCTTCAT |
|            | AATAATTGGC | TC         |            |            |            |
| SAV1_SE210 | CAAGATAAAG | AATTACCCGT | TAAACAGTA- | TTTGAGGAAT | GTT-GGTCAT |
|            | TGTGACACTG | GGGTCGTTTT | TAAAATCACT | CACAAGGCGT | CAGTCTTCAT |
|            | AATAATTGGC | TC         |            |            |            |

1 1 1 1 1  
5 108

|            |            |            |            |            |            |
|------------|------------|------------|------------|------------|------------|
| ASIAN2_Ema | CAGCAGTAGG | TTCAGCCTTA | GTGSTCTTTA | ACTTGTGGGT | CCYGAGCACA |
|            | GCTGGGCCTT | TTGGGGTACT | CCCAGATACG | GTCACATGTG | GAGACTTTCT |
|            | GGCTGGAG   |            |            |            |            |
| FOR_DS1535 | CAGCAGTAGG | TTCAGCCTTA | GTGGTCTTTA | ACTTGTGGGT | CCCGAGCACA |
|            | GCTGGGCCTT | TTGGGGTACT | CCCAGAAACG | GTCACATGTG | GAGACTTTCT |
|            | GGCTGGAG   |            |            |            |            |
| MAM1_SP134 | CAGCAGTAGG | TTCAGCCTTA | GTGGTCTTTA | ACTTGTGGGT | CCCGAGCACA |
|            | GCTGGGCCTT | TTGGGGTACT | CCCAGATACG | GTCACATGTG | GAGACTTTCT |
|            | GGCTGGAG   |            |            |            |            |
| MAST_B191_ | TAGCAGCAGG | TTCAGCCTTA | GTGGTCTTTA | ACTTGTGGGT | CCCGAGCACA |
|            | GCTGGGCCTT | TTGGGGTACT | CCCAGATACG | GTCACATGTG | GAGACTTTCT |
|            | GGCTGGAA   |            |            |            |            |
| SAV1_SE210 | CAGCAGTAGG | TTCAGCCTTA | GTGGTCTTTA | ACTTGTGGGT | CCCGAGCACA |
|            | GCTGGGCCTT | TTGGGGTACT | CCCAGAAACG | GTCACATGTG | GAGACTTTCT |
|            | GGCTGGAG   |            |            |            |            |

1 1 1 1 1  
5 107

|            |            |            |            |            |            |
|------------|------------|------------|------------|------------|------------|
| ASIAN2_Ema | ATAATCATTG | TTGAGTTGTT | GGAGSCCACT | GTGAAGACTA | TTTTCGACAT |
|            | GACRACTTAG | AGCCATTTAT | CCCTTCATTC | TCTAGCTTCT | CCCTCCAGC- |
|            | AGAGAAC    |            |            |            |            |
| FOR_DS1535 | ATAATCATTG | TTGAGTTGTT | GGAGCCCACT | GTGAAGACTA | TTTTCGACAT |
|            | GACGACTTAG | AGCCATTTAT | CCCTTCATTC | TCTAGCTTCT | CCCTCCAGC- |
|            | AGAGAAC    |            |            |            |            |
| MAM1_SP134 | ATAATCATTG | TTGAGTTGTT | GGAGCCCACT | GTGAAGACTA | TTTTCGACAT |
|            | GATGACTTAG | AGCCATTTAT | CCCTTCATTC | TCTAGCTTCT | CCCTCCAGC- |
|            | AGAGAAC    |            |            |            |            |
| MAST_B192_ | ATAATCATTG | TTGAGTTGTT | GGAGCCCACT | GTGAAGACTA | TTTTCGACAT |
|            | GACGACTTAG | AGCCATTTAT | CCCTTCATTC | TCTAGCTTCT | CCCTCCAGCG |
|            | AGAGAAC    |            |            |            |            |
| SAV1_SE210 | ATAATCATTG | TTGAGTTGTT | GGAGCCCACT | GTGAAGACTA | TTTTCGACAT |
|            | GACGACTTAG | AGCCATTTAT | CCCTTCATTC | TCTAGCTTCT | CCCTCCAGC- |
|            | AGAGAAC    |            |            |            |            |

1 1 1 1 1  
5 107

|            |                                     |                          |                          |                          |                           |
|------------|-------------------------------------|--------------------------|--------------------------|--------------------------|---------------------------|
| ASIAN2_Ema | GTACAGGAAC<br>AGGGTATGTT<br>TAAAAAA | AGATGTGTGG<br>CTACAATCTT | GACAACAAGA<br>ATTAAAAAGC | TCATTTGT-A<br>AAACCAAAAC | CCTAGTTCAG<br>AAAACCTCAAT |
| FOR_DS1535 | GTACAGGAAC<br>AGGGTATGTT<br>TAAAAAA | AGATGTGTGG<br>CTACAATCTT | GACAACAAGA<br>ATTAAAAAGC | TCATTTGT-A<br>AAACCAAAAC | CCTAGTTCAG<br>AAAACCTCAAT |
| MAM1_SP134 | GTACAGGAAC<br>AGGGTATGTT<br>TAAAAAA | AGATGTGTGG<br>CTACAATCTT | GACAACAAGA<br>ATTAAAAAGC | TCATTTGT-A<br>AAACCAAAAC | CCTAGTTCAG<br>AAAACCTCAAT |
| MAST_B193_ | GTGTAGGAAC<br>AGGGTATGTT<br>TAAAAAA | AGATATGTGG<br>CCACAATCTT | GACAACAAGA<br>ATTAAAAAGC | TCATTTGT-A<br>AAACCAAAAC | CTTAGTTGAG<br>AAAACCTCAAT |
| SAV1_SE210 | GTACAGGAAC<br>AGGGTATGTT<br>TAAAAAA | AGATGTGTGG<br>CTACAATCTT | GACAACAAGA<br>ATTAAAAAGC | TCATTTGT-A<br>AAACCAAAAC | CCTAGTTCAG<br>AAAACCTCAAT |

1 1 1 1 1  
5 107

|            |                                     |                          |                          |                          |                          |
|------------|-------------------------------------|--------------------------|--------------------------|--------------------------|--------------------------|
| ASIAN2_Ema | GATAACGAGC<br>TGCCAGAAAG<br>CCCTTTC | TGAACGCAGG<br>TCCACATATA | ATCCAGAGCA<br>TTGGATGCAG | GAGCAAAAGC<br>GCCACACCCC | CAGCGAGCTT<br>CAAGGAAACT |
| FOR_DS1535 | GATAACGAGC<br>TGCCAGAAAG<br>CCCTTTC | TGAATGCAGG<br>TCCACATATA | ATCCAGAGCA<br>YTGGATGCAG | GAGCAAAAGC<br>GCCACACCCC | CAGCGAGCTT<br>CAAGGAAACT |
| MAM1_SP134 | GATAACGAGC<br>TGCCAGAAAG<br>CCCTTTC | TGAATGCAGG<br>TCCACATATA | ATCCAGAGCA<br>TTGGATGCAG | GAGCAAAAGC<br>GCCACACCCC | CAGCGAGCTT<br>CAAGGAAACT |
| MAST_B194_ | GTCAATGAGC<br>TGCCAGAAAG<br>CCGTTTC | TGAATGCAAG<br>TCCACATATA | ATCCAGAGCA<br>TTGGATGCAG | AAGCAGAAGC<br>GCCACACACC | CTGCGAGCTT<br>CGAGGAAACT |
| SAV1_SE210 | GATAACGAGC<br>TGCCAGAAAG<br>CCCTTTC | TGAATGCAGG<br>TCCACATATA | ATCCAGAGCA<br>TTGGATGCAG | GAGCAAAAGC<br>GCCACACCCC | CAGCGAGCTT<br>CAAGGAAACT |

1 1 1 1 1  
5 107

|            |                                    |                          |                          |                          |                          |
|------------|------------------------------------|--------------------------|--------------------------|--------------------------|--------------------------|
| ASIAN2_Ema | TCTTTACAAG<br>TACCAAATC<br>AGCAGCA | ATCAGATATT<br>AAGGCAGACA | TTACAATCAG<br>AGAGATAAAG | GAACATTCTT<br>CCTCAGCTGC | AGAGAACCAA<br>ACCAGCCAAG |
| FOR_DS1535 | TCTTTACAAG<br>TACCAAATC<br>AGMAGCA | ATCAGATATT<br>AAGGCAGACA | TTACAATCAG<br>AGMRATAAAG | GAACATTCTT<br>CCTCAGCTGC | AGAGAACCAA<br>ACCAGCCAAG |
| MAM1_SP134 | TCTTTACAAG<br>TACCAAATC<br>AGCAGCA | ATCAGATATT<br>AAGGCAGACA | TTACAATCAG<br>AGAGATAAAG | GAACATTCTT<br>CCTCAGCTGC | AGAGAACCAA<br>ACCAGCCAAG |
| MAST_B217_ | TCTTTACAAG<br>TACCAAATC<br>AGCAGCA | ATCAGATATT<br>AAGGCAGACA | TTACAATCAG<br>AGAGATAAAG | GAACATTCTT<br>CCTCAGCTGC | AGAGAACCAA<br>ACCAGCCAAG |
| SAV1_SE210 | TCTTTACAAG<br>TACCAAATC<br>AGCAGCA | ATCAGATATT<br>AAGGCAGACA | TTACAATCAG<br>AGAGATAAAG | GAACATTCTT<br>CCTCAGCTGC | AGAGAACCAA<br>ACCAGCCAAG |

1 1 1 1 1  
5 108

|            |                                      |                          |                          |                          |                          |
|------------|--------------------------------------|--------------------------|--------------------------|--------------------------|--------------------------|
| ASIAN2_Ema | TGAGCATTGG<br>CTGGCCCTCG<br>TCCCAAAC | GACTGGCTCC<br>GCTGGTTCCT | TGTGTAGGCG<br>CATCCTCCCC | TCTGGGGAGA<br>TCATCTCCAG | CTGCGGCCCT<br>ATCTGGACAC |
| FOR_DS1535 | TGAGCATTGG<br>CTGGCCCTCG<br>TCCCAAAC | GACTGGCTCC<br>GCTGGTTCCT | TGTGTAGGCG<br>CATCCTCCCC | TCTGGGGAGA<br>TCATCTCCAG | CTGCGGCCCT<br>ATCTGGACAC |
| MAM1_SP134 | TGAGCATTGG<br>CTGGCCCTCG<br>TCCCAAAC | GACTGGCTCC<br>GCTGGTTCCT | TGTGTAGGCG<br>CATCCTCCCC | TCTGGGGAGA<br>TCATCTCCAG | CTGCGGCCCT<br>ATCTGGACAC |
| MAST_B219_ | TGAGCATTGG                           | GACTGGCTCC               | TGTGTAGGCG               | TCTGGGGAGA               | CTGCGGCC-T               |

|            |                                      |                          |                          |                          |                          |
|------------|--------------------------------------|--------------------------|--------------------------|--------------------------|--------------------------|
|            | CTGGCCCTCG<br>TCCCAAAC               | GCTGGTTCCT               | CATCCTCCCC               | TCATCTCCAG               | ATCTGGACAC               |
| SAV1_SE210 | TGAGCATTGG<br>CTGGCCCTCG<br>TCCCAAAC | GACTGGCTCC<br>GCTGGTTCCT | TGTGTAGGCG<br>CATCCTCCCC | TCTGGGGAGA<br>TCATCTCCAG | CTGCGGGCCT<br>ATCTGGACAC |

1 1 1 1 1  
5 107

|            |                                     |                          |                          |                          |                          |
|------------|-------------------------------------|--------------------------|--------------------------|--------------------------|--------------------------|
| ASIAN2_Ema | TAGATGACTG<br>CTGGATTTGG<br>GTGAAAG | GGTGGG-TCC<br>TTTCAGGTGT | ACCAAGTTTA<br>TGGAGATCAT | TGAAAGAAGA<br>GGTTGAAATT | TAGGAATAT-<br>TAGGGACAGA |
| FOR_DS1535 | TAGATGACTG<br>CTGGATTTGG<br>GTGAAAG | GGTGGG-TCC<br>TTTCAGGTGT | ACCAAGTTTA<br>TGGAGATCAT | TGAAAGAAGA<br>GGTTGAAWTT | TAGGAATAT-<br>TAGGGACAGA |
| MAM1_SP134 | TAGATGACTG<br>CTGGATTTGG<br>GTGAAAG | GGTGGG-TCC<br>TTTCAGGTGT | ACCAAGTTTA<br>TGGAGATCAT | TGAAAGAAGA<br>GGTTGAAATT | TAGGAATAT-<br>TAGGGACAGA |
| MAST_B220_ | TAGGGAAAAA<br>CTGGATTTGG<br>GTAAAAG | AATAAAGAAT<br>TTTCAGGTGT | ACCAAGTTTA<br>TGGAGATCAT | TGAGAGAAGA<br>GGTTGAAATT | TGGGAATATT<br>TAGGGACAGA |
| SAV1_SE210 | TAGATGACTG<br>CTGGATTTGG<br>GTGAAAG | GGTGGG-TCC<br>TTTCAGGTGT | ACCAAGTTTA<br>TGGAGATCCT | TGAAAGAAGA<br>GGTTGAAATT | TAGGAATAT-<br>TAGGGACAGA |

1 1 1 1 1  
5 107

|            |                                     |                          |                          |                          |                          |
|------------|-------------------------------------|--------------------------|--------------------------|--------------------------|--------------------------|
| ASIAN2_Ema | CCTCAGGGCC<br>GAGAAGGATC<br>TCGTGAG | CCACCACGAT<br>AACCGCACTG | GCACGTGCAG<br>TGATTGGGAT | CTGATCATGG<br>GAGCCGACAG | AGCGGCTGCT<br>TCTCCCCACA |
| FOR_DS1535 | CCTCAGGGCC<br>GAGAAGGATC<br>TCGTGAG | CCACCACGAT<br>AACCGCACTG | GCACGTGCAG<br>TGATTGGGAT | CTGATCATGG<br>GAGCCGACAG | AGCGGCTGCT<br>TCTCCCCACA |
| MAM1_SP134 | CCTCAGGGCC<br>GAGAAGGATC<br>TCGTGAG | CCACCACGAT<br>AACCGCACTG | GCACGTGCAG<br>TGATTGGGAT | CTGATCATGG<br>GAGCCGACAG | AGCGGCTGCT<br>TCTCCCCACA |
| MAST_B221_ | TCTCAGGGCC<br>GAGAAGGATC<br>TCGTAAA | CCACCACGAT<br>AACCGCACTG | GCACGTGCAG<br>TGATTGAGAT | CTGATCATGG<br>GAGCCGACAG | AGCGGTTGTT<br>TCTCCCCACA |
| SAV1_SE210 | CCTCAGGGCC<br>GAGAAGGATC<br>TCGTGAG | CCACCACGAT<br>AACCGCACTG | GCACGTGCAG<br>TGATTGGGAT | CTGATCATGG<br>GAGCCGACAG | AGCGGCTGCT<br>TCTCCCCACA |

1 1 1 1 1  
5 107

|            |                                     |                          |                          |                          |                          |
|------------|-------------------------------------|--------------------------|--------------------------|--------------------------|--------------------------|
| ASIAN2_Ema | TTGGACACAT<br>CAATGTGTTA<br>TTCAGGC | CTGCCAAACG<br>GTAAGGAGGG | GACCCGTGTG<br>TCCCCGAAG  | AGTGAGGCAA<br>GGATGAAGAG | GGCCAGGTCT<br>CTGAGCGAGC |
| FOR_DS1535 | TTGGACACAT<br>CAATGCGTTA<br>TTCAGGC | CTGCCAAACG<br>GTAAGGAGGG | GACCCGTGTG<br>TCCYCCGAAG | AGTGAGGCAA<br>GGATGAAGAG | GGCCAGGTCT<br>CTGAGCGAGC |
| MAM1_SP134 | TTGGACACAT<br>CAATGTGTTA<br>TTCAGGC | CTGCCAAACG<br>GTAAGGAGGG | GACCCGTGTG<br>TCCCCGAAG  | AGTGAGGCAA<br>GGATGAAGAG | GGCCAGGTCT<br>CTGAGCGAGC |
| MAST_B222_ | TTGGACATAT<br>CAATGCGTTA<br>TTCAGGC | TTGCCAAACG<br>GCAAGGAGGG | GACCCGTGTG<br>TCCCCAAAG  | AGTGAGGCAA<br>GGATGAAGAG | GGCCAGGTCT<br>CTGAGCAAGC |
| SAV1_SE210 | TTGGACACAT<br>CAATGCGTTA<br>TTCAGGC | CTGCCAAACG<br>GTAAGGAGGG | GACCCGTGTG<br>TCCCCGAAG  | AGTGAGGCAA<br>GGATGAAGAG | GGCCAGGTCT<br>CTGAGCGAGC |

1 1 1 1 1  
5 107

|            |                                     |                          |                          |                          |                          |
|------------|-------------------------------------|--------------------------|--------------------------|--------------------------|--------------------------|
| ASIAN2_Ema | CCCTCCTGGC<br>CCTCCACTTG<br>ATTATAC | TCTGAGGAAC<br>GGCTGTACAT | ACATGACCCT<br>CCARTGAACT | CCTCTAGTTA<br>CCAGTTCATT | ATAACCAATC<br>CAGGAGCCTT |
| FOR_DS1535 | CCCTCCTGGC<br>CCTCCACTTG            | TCTGAGGAAC<br>GGCTGTACAT | ACATGACCCT<br>CCAGTGAECT | CCTCTAGTTA<br>CCAGTTCATT | ATAACCAATC<br>CAGGAGCCTT |

|            |                                                |                          |                         |                          |                          |
|------------|------------------------------------------------|--------------------------|-------------------------|--------------------------|--------------------------|
| MAM1_SP134 | ATTATAC<br>CCCTCCYGGC<br>CCTCCACTTG<br>ATTATAC | TCTGAGGAAC<br>GGCTGTACAT | ACATGACCCT<br>CCAGTGAAC | CCTCTAGTTA<br>CCAGTTCATT | ATAACCAATC<br>CAGGAGCCTT |
| MAST_B195_ | CCCTCCTGGC<br>CCTCCACTTG<br>ATTATAC            | TCTGAGGAAC<br>GGCTGTACAT | ACATGACCCT<br>CCAGTGAAC | CCTCTAGTTA<br>CCAGTTCATT | ATAACCAATC<br>CAGGAGCCTT |
| SAV1_SE210 | CCCTCCTGGC<br>CCTCCACTTG<br>ATTATAC            | TCTGAGGAAC<br>GGCTGTACAT | ACATGACCCT<br>CCAGTGAAC | CCTCTAGTTA<br>CCAGTTCATT | ATAACCAATC<br>CAGGAGCCTT |

1 1 1 1 1  
5 110

|            |                                        |                          |                          |                          |                          |
|------------|----------------------------------------|--------------------------|--------------------------|--------------------------|--------------------------|
| ASIAN2_Ema | CCCACCTTGA<br>GGGCAAGGTC<br>GTGAAACTGG | GGTCACTTGG<br>CAGACAGAGA | GGCTGGGGTT<br>GAGCAAAGGC | GCATAAGGAA<br>AGGTAAGTGA | CTCAAAGTGA<br>GGAAGGAGAA |
| FOR_DS1535 | CCCACCTTGA<br>GGGCAAGGTC<br>GTGAAACTGG | GGTCACTTGA<br>CAGACAGAGA | GGCTGGGGTT<br>GAGCAAAGGC | GCATAAGGAA<br>AGGTAAGTGA | CTCAAAGTGA<br>GGAAGGAGAA |
| MAM1_SP134 | CCCACCTTGA<br>GGGCAAGGTC<br>GTGAAACTGG | GGTCACTTGG<br>CAGACAGAGA | GGCTGGGGTT<br>GAGCAAAGGC | GCATAAGGAA<br>AGGTAAGTGA | CTCAAAGTGA<br>GGAAGGAGAA |
| MAST_B196_ | TTTATCTTGA<br>GGGCAAGGTC<br>GTGAAACTGG | GGTCACTTGG<br>CAGACAGAGA | G-CTGGG-TT<br>GAGCAAAGGC | GCATAAGGAA<br>AGGTAAGTGA | CTCAAAGTGA<br>G-AAGGAGAA |
| SAV1_SE210 | CCCACCTTGA<br>GGGCAAGATC<br>GTGAAACTGG | GGTCACTTGG<br>CAGACAGAGA | GGCTGGGGTT<br>GAGCAAAGGC | GCATAAGGAA<br>AGGTAAGTGA | CTCAAAGTGA<br>GGAAGGAGAA |

1 1 1 1 1  
5 108

|            |                                      |                          |                          |                          |                          |
|------------|--------------------------------------|--------------------------|--------------------------|--------------------------|--------------------------|
| ASIAN2_Ema | TAAAATTATA<br>TGGGAAGTGG<br>GCTAGTGA | CGTTATTTTC<br>AGAGAAGAAC | TTCTTTGCTG<br>AGCTATCAGC | GTGCGAGGGG<br>TCAGGAAGAT | AGGAAGGTGA<br>TGAGGCATGA |
| FOR_DS1535 | TAAAATTATA<br>TGGGAAGTGG<br>GCTAGTGA | CGTTATTTTC<br>AGAGAAGAAC | TTCTTTGCTG<br>AGCTATCAGC | GTGCGAGGGG<br>TCAGGAAGAT | AGGAAGGTGA<br>TGAGGCATGA |
| MAM1_SP134 | TAAAATTATA<br>TGGGAAGTGG<br>GCTAGTGA | CGTTATTTTC<br>AGAGAAGAAC | TTCTTTGCTG<br>AGCTATCAGC | GTGCGAGGGG<br>TCAGGAAGAT | AGGAAGGTGA<br>TGAGGCATGA |
| MAST_B223_ | TAAAATTATA<br>-GGGAAGTGG<br>GCTAGTGA | CGTTATTTTC<br>AGAGAAGAAC | TTCTTTGCTG<br>AGCTATGAGC | GTGCGAGGGG<br>TCAGGAAGAT | AGGAAGGTGA<br>TGAGGCATGA |
| SAV1_SE210 | TAAAATTATA<br>TGGGAAGTGG<br>GCTAGTGA | CGTTATTTTC<br>AGAGAAGAAC | TTCTTTGCTG<br>AGCTATCAGC | GTGCGAGGGG<br>TCAGGAAGAT | AGGAAGGTGA<br>TGAGGCATGA |

1 1 1 1 1  
5 106

|            |                                    |                          |                          |                          |                          |
|------------|------------------------------------|--------------------------|--------------------------|--------------------------|--------------------------|
| ASIAN2_Ema | CAAGAAATTT<br>GTTTGTGCCC<br>GAACAA | TAAAGACAGT<br>ATTCCAAAGA | TACCTGGCCA<br>AAGGTGGTCC | ACTGACTGGA<br>AACAGAATGC | ATAGATTCAT<br>AGAAATTATT |
| FOR_DS1535 | CAAGAAATTT<br>GTTTGTGCCC<br>GAACAA | TAAAGACAGT<br>ATTCCAAAGA | TACCTGGCCA<br>AAGGTGGTCC | ACTGACTGGA<br>AACAGAATGC | ATAGATCCAT<br>AGAAATTATT |
| MAM1_SP134 | CAAGAAATTT<br>GTTTGTGCCC<br>GAACAA | TAAAGACAGT<br>ATTCCAAAGA | TACCTGGCCA<br>AAGGTGGTCC | ACTGACTGGA<br>AACAGAATGC | ATAGATCCAT<br>AGAAATTATT |
| MAST_B226_ | TAAGAAATTT<br>GTTTGTGCCC<br>GAACAA | TAAAGACAGT<br>ATTCCAAAGA | TACCTGGCCA<br>AAGGTGGTCC | ACTGACTGGA<br>AACAGAATGC | ATAGATCCAT<br>AGAAATTATT |
| SAV1_SE210 | CAAGAAATTT<br>GTTTGTGCCC<br>GAACAA | TAAAGACAGT<br>ATTCCAAAGA | TACCTGGCCA<br>AAGGTGGTCC | ACTGACTGGA<br>AACAGAATGC | ATAGATCCAT<br>AGAAATTATT |

1 1 1 1 1  
5 106



|            |                                    |                          |                          |                          |                          |
|------------|------------------------------------|--------------------------|--------------------------|--------------------------|--------------------------|
| ASIAN2_Ema | TTGCCAGGAA<br>AGGGTACATC<br>GGGGGG | TTTCTGGACC<br>TGTGCACCCA | TCCTTGGGAC<br>GAGTTCCTCC | CAAGGGCTGA<br>CCTTGGGGGG | TCTGGGTGCT<br>AGTCAAGCAA |
| FOR_DS1535 | TTGCCAGGAA<br>AGGGTACATC<br>GGGGGG | TTTCTGGACC<br>TGTGCACCCA | TCCTTGGGAC<br>GAGTTCCTCC | CAAGGGCTGA<br>CCTTGGGGGY | TCTGGGTGCT<br>AGTCAAGCAA |
| MAM1_SP134 | TTGCCAGGAA<br>AGGGTACATC<br>GGGGGG | TTTCTGGACC<br>TGTGCACCCA | TCCTTGGGAC<br>GAGTTCCTCC | CAAGGGCTGA<br>CCTTGGGGGG | TCTGGGTGCT<br>AGTCAAGCAA |
| MAST_B197_ | TTGCCAGGAA<br>AAAGTACATC<br>GGAGGA | TTTCTGGACC<br>TGTGCACCCA | TCTTTGGGAC<br>GAGTTCCTCC | CAAGGGCTGA<br>CCTTGGGGGG | TCTGGGTGCT<br>AGTCAAGCAA |
| SAV1_SE210 | TTGCCAGGAA<br>AGGGTACATC<br>GGGGGG | TTTCTGGACC<br>TGTGCACCCA | TCCTTGGGAC<br>GAGTTCCTCC | CAAGGGCTGA<br>CCTTGGGGGG | TCTGGGTGCT<br>AGTCAAGCAA |

1 1 1 1 1  
5 110

|            |                                        |                          |                          |                          |                          |
|------------|----------------------------------------|--------------------------|--------------------------|--------------------------|--------------------------|
| ASIAN2_Ema | GAAACATCAG<br>CTACCTTACC<br>CTCTTTT-CT | GCCTAAGCAT<br>TAGAGTCACA | CCAAAGAAAT<br>GACAGATCAT | GGAGACCC-A<br>C-AAG-TCCT | GAGAGGTTAG<br>TT-CTCTTCA |
| FOR_DS1535 | GAAACATCAG<br>CTACCTTACC<br>CTCTTTT-CT | GTCTAMGCAT<br>TAGAGTCACA | CCAAAGAAAT<br>GACAGATCAT | GGAGACCC-A<br>C-AAG-TCCT | GAGAGGTTAG<br>TT-CTCTTCA |
| MAM1_SP134 | GAAACATCAG<br>CTACCTTACC<br>CTCTTTT-CT | GCCTAAGCAT<br>TAGAGTCACA | CCAAAGAAAT<br>GACAGATCAT | GGAGACCCCA<br>C-AAG-TCCT | GAGAGGTTAG<br>TT-CTCTTCA |
| MAST_B198_ | GAA-CATCAG<br>CTACCTTACC<br>CTCTTTTTCT | GTCTAAGCAT<br>TAGAGTCACA | CCAA-GAA-T<br>GACAGATCAT | GGAGACCC-A<br>CGAAGGTCT  | GAGAGGTTAG<br>TTTCTCTTCA |
| SAV1_SE210 | GAARCATCAG<br>CTACCTTACC<br>CTCTTTT-CT | GTCTAAGCAT<br>TAGAGTCACA | CCAAAGAAAT<br>GACAGATCAT | GGAGACCC-A<br>C-AAG-TCCT | GAGAGGTTAG<br>TT-CTCTTCA |

1 1 1 1 1  
5 106

|            |                                    |                          |                          |                          |                          |
|------------|------------------------------------|--------------------------|--------------------------|--------------------------|--------------------------|
| ASIAN2_Ema | CAAAGAGGCA<br>CCCTATCTGC<br>AGTGGA | AAAG-----<br>TCGAATCCAA  | --TAGGACAT<br>GGAGTATCAC | GGACAAGCAT<br>AGAATAGGCA | GCTGCCTGAG<br>AAAGTCAGAA |
| FOR_DS1535 | CAAAGAGGCA<br>CCCTATCTGC<br>AGTGGA | AAAG-----<br>TCGAATCCAA  | --TAGGACAT<br>GGAGTATCAC | GGACAAGCAT<br>AGAATAGGCA | GCTGTCTGAG<br>AAAGTCAGAA |
| MAM1_SP134 | CAAAGAGGCA<br>CCCTATCTGC<br>AGTGGA | AAAG-----<br>TCGAATCCAA  | --TAGGACAT<br>GGAGTATCAC | GGACAAGCAT<br>AGAATAGGCA | GCTGCCTGAG<br>AAAGTCAGAA |
| MAST_B229_ | CAAAAAAGAG<br>CCCTATCTGC<br>AGTGGA | AAAGTCCCTT<br>TCGAATCCAA | GATAGGACAC<br>GGAGTATCAC | AGACAAGCAT<br>AGAATAGGCA | GCTGCCCGAG<br>AAAGTCAGAA |
| SAV1_SE210 | CAAAGAGGCA<br>CCCTATCTGC<br>AGTGGA | AAAG-----<br>TCGAATCCAA  | --TAGGACAT<br>GGAGTATCAC | GGACAAGCAT<br>AGAATAGGCA | GCTGCCTGAG<br>AAAGTCAGAA |

1 1 1 1 1  
5 107

|            |                                     |                          |                          |                          |                          |
|------------|-------------------------------------|--------------------------|--------------------------|--------------------------|--------------------------|
| ASIAN2_Ema | AGAACAGACG<br>-----                 | AGTGTGTGCA<br>---G-CTGTG | GTGTCA----<br>CC-AGGGCTC | -----<br>TG-TGGAAAA      | -----<br>GCTGCTGGGA      |
| FOR_DS1535 | GAACAGA<br>AGAACAGACG<br>GCTCCCTGGG | AGTGTGTGCA<br>ACAG-CTGTG | GTGTCAGAAG<br>CC-AGGGCTC | GTGCCCCCG-<br>TG-TGGAAAA | CCTCACACGC<br>GCTGCTGGGA |
| MAM1_SP134 | GAACAGA<br>AGAACAGACG<br>GCTCCCTGGG | AGTGTGTGCA<br>ACAG-CTGTG | GTGTCAGAGG<br>CC-AGGGCTC | GTGTCCCCG-<br>TG-TGGAAAA | CCTCACACGC<br>GCTGCTGGGA |
| MAST_B230_ | GAACAGA<br>AGAACAGACG<br>GCTCCCTGGG | AGTGTATGCA<br>ACAGGCTGTG | GCGTCAGA-G<br>CCGAGGGCTC | GTGCCCCCGG<br>TGGTGGAAAA | CCTCACACGT<br>GCTGCTGGGA |
| SAV1_SE210 | GAACAGA<br>AGAACAGACG<br>ACTCCCTGGG | AGTGTGTGCA<br>ACAG-CTGTG | GTGTCAGAAG<br>CC-AGGGCTC | GTGCCCCCG-<br>TG-TGGAAAA | CCTCACACGC<br>GCTGCTGGGA |

GAACAGA

1 1 1 1 1  
5 106

|            |                                    |                          |                          |                          |                          |
|------------|------------------------------------|--------------------------|--------------------------|--------------------------|--------------------------|
| ASIAN2_Ema | TCTAAGTGAA<br>GAGGGGCTTC<br>AGCCCA | GATGAGACGT<br>AGGAAATGAG | CTCAAGGAAT<br>TGAAGAAGGC | CAAGGCACTG<br>ACAGCCTCAG | CAGTGGGCAG<br>CCTCCTGGTG |
| FOR_DS1535 | TCTAAGTGAA<br>GAGGGGCTTC<br>AGCCCA | GATGAGACGT<br>AGGAAATGAG | CTCAAGGAAT<br>TRAAGAAGGC | CAAGGCACTG<br>ACAGCCTCAG | CAGTGGGCAG<br>CCTCCTGGTG |
| MAM1_SP134 | TCTAAGTGAA<br>GAGGGGCTTC<br>AGCCCT | GATGAGACGT<br>AGGAAATGAG | CTCAAGGAAT<br>TGAAGAAGGC | CAAGGCACTG<br>ACAGCCTCAG | CAGTGGGCAG<br>CCTCCTGGTG |
| MAST_B233_ | TCTAAGTGAA<br>GAGGGGCTTC<br>AGCCCA | GATGAGCCGT<br>AGGAAATGAG | CTCAAGGAAT<br>TGAAGAAGGC | CAAGGCACTG<br>ACAACCTCAG | CAGTGGGCAG<br>CCTCCTGGTG |
| SAV1_SE210 | TCTAAGTGAA<br>GAGGGGCTTC<br>AGCCCA | GATGAGCCGT<br>AGGAAATGAG | CTCAAGGAAT<br>TGAAGAAGGC | CAAGGCACTG<br>ACAGCCTCAG | CAGTGGGCAG<br>CCTCCTGGTG |

1 1 1 1 1  
5 52

|            |                  |            |            |            |            |
|------------|------------------|------------|------------|------------|------------|
| ASIAN2_Ema | TCTCAGGCCT<br>GA | C-AGTCTTCA | CATCCGCCC- | AC-AGGGGCT | TGTCTGTTTT |
| FOR_DS1535 | TCTCAGGCCT<br>GA | C-AGTCTTCA | CATCCGCCC- | AC-AGGGGCT | TGTCTGTTTT |
| MAM1_SP134 | TCTCAGGCCT<br>GA | C-AGTCTTCA | CATCCGCCC- | AC-AGGGGCT | TGTCTGTTTT |
| MAST_B234_ | CTTCAG-CCT<br>AA | CGAGTCTCCA | CATCCGCCCT | ACGAGGGGCT | TGTCTGTTTT |
| SAV1_SE210 | TCTCAGGCCT<br>GA | C-AGTCTTCA | CATCCGCCC- | AC-AGGGGCT | TGTCTGTTTT |

1 1 1 1 1  
5 106

|            |                                 |                          |                          |                          |                          |
|------------|---------------------------------|--------------------------|--------------------------|--------------------------|--------------------------|
| ASIAN2_Ema | GGGCCTCTCA<br>TCAGCCC<br>CTGCCC | GTCTCTCCAG<br>TGCTCTGTGT | AGTCTTTGGC<br>CTCCAGGTAA | CAGAGATAAC<br>GAGTCTACCA | TGGGCTCCAC<br>CATGCCCAGC |
| FOR_DS1535 | GGGCCTCTCA<br>TCAGCCC<br>CTGCCC | GTCTCTCCAG<br>TGCTCTGTGT | AGTCTTTGGC<br>CTCCAGGTAA | CAGAGATAAC<br>GAGTCTACCA | TGGGCTCCAC<br>CATGCCCAGC |
| MAM1_SP134 | GGGCCTCTCA<br>TCAGCCC<br>CTGCCC | GTCTCTCCAG<br>YGCTCTGTGT | AGTCTTTGGC<br>CTCCAGGTAA | CAGAGATAAC<br>GAGTCTACCA | TGGGCTCCAC<br>CATGCCCAGC |
| MAST_B200_ | GGGCCTCTCA<br>TCAGCCC<br>CTGCCC | GTCTCTCCAG<br>TGCTATATGT | AGTCTTTGGC<br>CTCCAGGTAA | CAGAGATAAC<br>GAGTCTACCA | TGGGCTGCAC<br>CATGCCCAGC |
| SAV1_SE210 | GGGCCTCTCA<br>TCAGCCC<br>CTGCCC | GTCTCTCCAG<br>TGCTCTGTGT | AGTCTTTGGC<br>CTCCAGGTAA | CAGAGATAAC<br>GAGTCTACCA | TGGGCTCCAC<br>CATGCCCAGC |

1 1 1 1 1  
5 106

|            |                                    |                          |                          |                          |                           |
|------------|------------------------------------|--------------------------|--------------------------|--------------------------|---------------------------|
| ASIAN2_Ema | CGATAAGAGA<br>TAGGAATCCA<br>ATTCTA | TTGAAA-TC-<br>TGTAGCAATT | TGAGTGCAAG<br>TCA-TAAACA | AACGTC-TGA<br>AATGCTGTGG | AACATTTTTTC<br>-AAAGGA-GC |
| FOR_DS1535 | CGATAAGAGA<br>TAGGAATCCA<br>ATTCTA | TTGAAA-TC-<br>TGTAGCAATT | TGAGTGCAAG<br>TCA-TAAACA | AACGTC-TGA<br>AATGCTGTGG | AACATTTTTTC<br>-AAAGGA-GC |
| MAM1_SP134 | CGATAAGAGA<br>TAGGAATCCA<br>ATTCTA | TTGAAA-TC-<br>TGTAGCAATT | TGAGTGCAAG<br>TCA-TAAACA | AACGTC-TGA<br>AATGCTGTGG | AACATTTTTTC<br>-AAAGGA-GC |
| MAST_B236_ | TGATAAGAGA<br>TAGGAATCCA<br>ATTCTA | TTGAAAATCC<br>TGTAGCAATT | TGAGTGCAAG<br>TCAGTAAGCA | AATGTCCTGA<br>AATGCTGTGG | AACATTTTTTT<br>TAAAGGACGC |
| SAV1_SE210 | CGATAAGAGA<br>TAGGAATCCA           | TTGAAA-TC-<br>TGTAGCAATT | TGAGTGCAAG<br>TCA-TAAACA | AACGTC-TGA<br>AATGCTGTGG | AACATTTTTTC<br>-AAAGGA-GC |

ATTCTA

1 1 1 1 1  
5 106

|            |                                    |                          |                           |                          |                          |
|------------|------------------------------------|--------------------------|---------------------------|--------------------------|--------------------------|
| ASIAN2_Ema | AGTCCACAAA<br>AGCTGCGGTA<br>TCTTGG | -GTTAGCCAT<br>GGCTCCTGAG | GTGAGCATGA<br>GATAAAGGACG | ACCCTCAAGG<br>CATACTCTGG | GAGAAGGGCA<br>TTTTAAACTC |
| FOR_DS1535 | AGTCCACAAA<br>AGCTGCGGTA<br>TCTTGG | -GTTAGCCAT<br>GGCTCCTGAG | GTGAGCATGA<br>GATAAAGGACG | ACCCTCAAGG<br>CATACTCTGG | GAGAAGGGCA<br>TTTTAAACTC |
| MAM1_SP134 | AGTCCACAAA<br>AGCTGCGGTA<br>TCTTGG | -GTTAGCCAT<br>GGCTCCTGAG | GTGAGCATGA<br>GATAAAGGACG | ACCCTCAAGG<br>CATACTCTGG | GAGAAGGGCA<br>TTTTAAACTC |
| MAST_B237_ | AGTTCACAAA<br>AGCTGTGGTA<br>TCTTAA | AGTTAGCCAT<br>GGCTCCTGAG | GTGAGCATGA<br>GATAAAGGATG | ACCCTCAAGG<br>CCTACTCTGG | GAGAAGGGCA<br>TTTTAAACTC |
| SAV1_SE210 | AGTCCACAAA<br>AGCTGCGGTA<br>TCTTGG | -GTTAGCCAT<br>GGCTCCTGAG | GTGAGCATGA<br>GATAAAGGACG | ACCCTCAAGG<br>CATACTCTGG | GAGAAGGGCA<br>TTTTAAACTC |

1 1 1 1 1  
5 105

|            |                                   |                          |                          |                          |                          |
|------------|-----------------------------------|--------------------------|--------------------------|--------------------------|--------------------------|
| ASIAN2_Ema | GCATTATTAA<br>ATCCCTCAGC<br>GAGAG | TTTCTCTTAC<br>ATCTG-CAAA | CTGTCTCCTA<br>TGCCAGTAAC | GTTGTAATCT<br>GAGTTTC-TC | CAGATACTAC<br>ATACTAAATA |
| FOR_DS1535 | GCATTATTAA<br>ATCCCTCAGC<br>GAGAG | TTTCTCTTAC<br>ATCTG-CAAA | CTGTCTCCTA<br>TGCCAGTAAC | GTTGTAATCT<br>GAGTTTC-TC | CAGATACTAC<br>ATACTAAATA |
| MAM1_SP134 | GCATTATTAA<br>ATCCCTCAGC<br>GAGAG | TTTCTCTTAC<br>ATCTG-CAAA | CTGTCTCCTA<br>TGCCAGTAAC | GTTGTAATCT<br>GAGTTTC-TC | CAGATACTAC<br>ATACTAAATA |
| MAST_B240_ | GCATTATTAA<br>ATCCCTCAGC<br>GAGAT | TTTCTCTTAC<br>ATCTGGCAAA | CTGTCTCCTA<br>TGCCAGTAAC | GTTGTAATCT<br>GAGTTTCGTC | CAGATACTAC<br>ATACTAAATG |
| SAV1_SE210 | GCATTATTAA<br>ATCCCTCAGC<br>GAGAG | TTTCTCTTAC<br>ATCTG-CAAA | CTGTCTCCTA<br>TGCCAGTAAC | GTTGTAATCT<br>GAGTTTC-TC | CAGATACTAC<br>ATACTAAATA |

1 1 1 1 1  
5 105

|            |                                   |                          |                          |                          |                          |
|------------|-----------------------------------|--------------------------|--------------------------|--------------------------|--------------------------|
| ASIAN2_Ema | TGGCCTACCC<br>C-AGGCCCC-<br>GTCCT | CAGCCCCTGT<br>TCC-TGCCTG | CATTTGAGGA<br>CACAAGTGAA | TGACCCAAAG<br>GGGCAGCTCT | CGTTCACCCC<br>CAGGGGTACA |
| FOR_DS1535 | TGGCCTACCC<br>C-AGGCCCC-<br>GTCCT | CAGCCCCTGT<br>TCC-TGCCTG | CATTTGAGGA<br>CACAAGTGAA | TGACCCAAAG<br>GGGCAGCTCT | SGTTCACCCC<br>CAGGGGTACA |
| MAM1_SP134 | TGGCCTACCC<br>C-AGGCCCC-<br>GTCCT | CAGCCCCTGT<br>TCC-TGCCTG | CATTTGAGGA<br>CACAAGTGAA | TGACCCAAAG<br>GGGCAGCTCT | CGTTCACCCC<br>CAGGGGTACC |
| MAST_B241_ | GTTTTATTTT<br>CCAGGCCCCC<br>GTCCT | TAGTTCCTGT<br>TCCCTGCCTG | NATTTGAGGA<br>CACAAGTGAA | TGACCCAAAG<br>GGGCAGCTCT | GGTTCACCCC<br>CAGGGGTACA |
| SAV1_SE210 | TGGCCTACCC<br>C-AGGCCCC-<br>GTCCT | CAGCCCCTGT<br>TCC-TGCCTG | CATTTGAGGA<br>CACAAGTGAA | TGACCCAAAG<br>GGGCAGCTCT | GGTTCACCCC<br>CAGGGGTACA |

1 1 1 1 1  
5 105

|            |                                   |                          |                          |                          |                          |
|------------|-----------------------------------|--------------------------|--------------------------|--------------------------|--------------------------|
| ASIAN2_Ema | TAACCCACCC<br>GGACAGAGTA<br>CAAAC | AGTGCTGTCG<br>GAACTGCCTC | AGTTGATTAC<br>ATAGAGTTTC | TGACTCATAG<br>CAAGGAGTGC | CGACCCTAAA<br>CTGGCGGATT |
| FOR_DS1535 | TAACCCACCC<br>GGACAGAGTA<br>CAAAC | AGTGCTGTCG<br>GAACTGCCTC | AGTTGATTAC<br>ATAGAGTTTC | TGACTCATAG<br>CAAGGAGTGC | CGACCCTAAA<br>CTGGCGGATT |
| MAM1_SP134 | TAACCCACCC<br>GGACAGAGTA<br>CAAAC | AGTGCTGTCG<br>GAACTGCCTC | AGTTGATTAC<br>ATAGAGTTTC | TGACTCATAG<br>CAAGGAGTGC | CGACCCTAAA<br>CTGGCGGATT |

|            |                                   |                          |                          |                          |                          |
|------------|-----------------------------------|--------------------------|--------------------------|--------------------------|--------------------------|
| MAST_B242_ | TAACCCACCC<br>GGACAGAGTA<br>CAAAC | AGTGCTGTCG<br>GAATTGCCTT | AGTTGATTAC<br>ATAGAGTTTC | TGACTCATAG<br>CAAGGAGCGT | CGACCCTGTA<br>CTGGCAGATT |
| SAV1_SE210 | TAACCCACCC<br>GGACAGAGTA<br>CAAAC | AGTGCTGTCG<br>GAACTGCCTC | AGTTGATTAC<br>ATAGAGTTTC | TGACTCATAG<br>CAAGGAGTGC | CGACCCTAAA<br>CTGGCGGATT |

1 1 1 1 1  
5 105

|            |                                    |                          |                         |                          |                          |
|------------|------------------------------------|--------------------------|-------------------------|--------------------------|--------------------------|
| ASIAN2_Ema | GTGCCCCGACC<br>GTCTGTATAC<br>AGAAG | TCAGTCAACT<br>ATCTGACCAC | GCTGAGAGTG<br>ACGTCCTCC | TTCTTAAGTC<br>TTTCTCTCTC | CTGTGTGTAT<br>TTCTTAGTAC |
| FOR_DS1535 | GTGCCCCGACC<br>GTCCGTATAC<br>AGAAG | TCAGTCAACT<br>ATCTGACCAC | GCTGAGAGTG<br>ACGTCCTCC | TTCTTAAGTC<br>TTTCTCTCTC | CTGTGTGTAT<br>TTCTTAGTAC |
| MAM1_SP134 | GTGCCCCGACC<br>GTCCATATAC<br>AGAAG | TCAGTCAACT<br>ATCTGACCAC | GCTGAGAGTG<br>ACGTCCTCC | TTCTTAAGTC<br>TTTCTCTCTC | CTGTGTGTAT<br>TTCTTAGTAC |
| MAST_B243_ | GTGCCCCGACC<br>GTCTGTATAC<br>AAAAA | TCAGTCAATT<br>ATCTGACCAC | GCTGAGAGTG<br>ACGTCCTCC | TTCTTAAGTC<br>TTTCTCTCTC | CTGTGTGTAT<br>TTCTTAGTAC |
| SAV1_SE210 | GTGCCCCGACC<br>GTCCGTATAC<br>AGAAG | TCAGTCAACT<br>ATCTGACCAC | GCTGAGAGTG<br>ACGTCCTCC | TTCTTAAGTC<br>TTTCTCTCTC | CTGTGTGTAT<br>TTCTTAGTAC |

1 1 1 1 1  
5 106

|            |                                    |                          |                          |                          |                          |
|------------|------------------------------------|--------------------------|--------------------------|--------------------------|--------------------------|
| ASIAN2_Ema | TTCTTAACTG<br>AAACAGTAGC<br>ATGGGG | CAGCCTGGAG<br>AGAGAATCAA | AAAAGTGGTG<br>TAGACATATC | TCAGAAAACA<br>ACACCGACAG | AATATTTGGG<br>AGTGATGTCC |
| FOR_DS1535 | TTCTTAACTG<br>AAAGAGTAGC<br>ATGGGG | CAGCCTGGAG<br>AGAGAATCAA | AAAAGTGGTG<br>TAGACATATC | TCAGAAAAGA<br>ACAGCAACAG | AATATTTGGG<br>AGTGATGTCC |
| MAM1_SP134 | TTCTTAACTG<br>AAAGAGTAGC<br>ATGGGG | CAGCCTGGAG<br>AGAGAATCAA | AAAAGTGGTG<br>TAGACATATC | TCAGAAAAGA<br>ACAGCGACAG | AATATTTGGG<br>AGTGATGTCC |
| MAST_B244_ | TTCTTAACTG<br>AAAGAGGAGC<br>ATGGAA | CAGCCTGGAG<br>AGAGAATCAC | AAAAGTGGTG<br>TAGACATATC | TCAGAAAAGA<br>ACAGCGACAG | AATATTTGG-<br>AGTGATGTCC |
| SAV1_SE210 | TTCTTAACTG<br>AAAGAGTAGC<br>ATGGGG | CAGCCTGGAG<br>AGAGAATCAA | AAAAGTGGTG<br>TAGACATATC | TCAGAAAAGA<br>ACAGCGACAG | AATATTTGGG<br>AGTGATGTCC |

1 1 1 1 1  
5 106

|            |                                    |                          |                          |                          |                          |
|------------|------------------------------------|--------------------------|--------------------------|--------------------------|--------------------------|
| ASIAN2_Ema | AGGTGACAGC<br>CCGTGCGGAA<br>AGCTTC | TGGGTCTGCA<br>GGTAGCCTGG | AGTCTGTCCT<br>TCTCCCTGTG | TTCTGATGGC<br>GGAATTACCT | CACCAGCGCA<br>GGCGTCTGCC |
| FOR_DS1535 | AGGTGACAGC<br>CCGTGCGGAA<br>AGCTTC | TGGGTCTGCA<br>GGTAGCCTGG | AGTCTGTCCT<br>TCTCCCTGTG | TTCTGATGGC<br>GGAATTACCT | CACCAGCGCA<br>GGCGTCTGCC |
| MAM1_SP134 | AGGTGACAGC<br>CCGTGCGGAA<br>AGCTTC | TGGGTCTGCA<br>GGTAGCCTGG | AGTCTGTCCT<br>TCTCCCTGTG | TTCTGATGGC<br>GGAATTACCT | CACCAGCGCA<br>GGCGTCTGCC |
| MAST_B245_ | AGGTGAGAGC<br>CTGTGCGGAA<br>AGCTTC | TGGGTCTGCA<br>GGTAACCTGG | AGTCTGTCCT<br>TCTCCCTATG | TTCTGATGGC<br>G-AATTACCT | CACCAGCGCA<br>GGCGTCTGCC |
| SAV1_SE210 | AGGTGACAGC<br>CCGTGCGGAA<br>AGCTTC | TGGGTCTGCA<br>GGTAGCCTGG | AGTCTGTCCT<br>TCTCCCTGTG | TTCTGATGGC<br>GGAATTACCT | CACCAGCGCA<br>GGCGTCTGCC |

1 1 1 1 1  
5 105

|            |                                   |                          |                          |                          |                          |
|------------|-----------------------------------|--------------------------|--------------------------|--------------------------|--------------------------|
| ASIAN2_Ema | GCCCCGCC-T<br>CTAGGCCTGT<br>ATCTG | CCTGGCAGGT<br>GCTCTGGAGG | CGATCACCTT<br>GCCTCCAGGC | GACTGGTCGA<br>TGGCCATCTC | GGCACCCGCA<br>CCCCTCGAAC |
| FOR_DS1535 | GCCCCGCC-T                        | CCTGGCAGGT               | CGATCACCTT               | GACTGGTCGA               | GGCACCCGCA               |

|            |                     |            |            |              |            |
|------------|---------------------|------------|------------|--------------|------------|
|            | CTAGGCCTGT          | GCTCTGGAGG | GCCTCCAGGC | TGGCCATCTC   | CCCCTCGAAC |
| MAM1_SP134 | ATCTG<br>GCCCCGCC-T | CCTGGCAGGT | CGATCACCTT | GA CTGGT CGA | GGCACCCGCA |
|            | CTAGGCCTGT          | ACTCTGGAGG | GCCTCCAGGC | TGGCCATCTC   | CCCCTCGAAC |
| MAST_B246_ | ATCTG<br>GCCCCGCCCT | CCTGGCAGGT | CGATCACCTT | GA CTGGT CGA | GGCACTCGCA |
|            | CTAGGCCTGT          | GCTCTGGAGG | GCCTCCAGGC | TGGCCATCTC   | CCCCTCGAAC |
| SAV1_SE210 | ATCTG<br>GCCCCGCC-T | CCTGGCAGGT | CGATCACCTT | GA CTGGT CGA | GGCACCCGCA |
|            | CTAGGCCTGT          | GCTCTGGAGG | GCCTCCAGGC | TGGCCATCTC   | CCCCTCGAAC |
|            | ATCTG               |            |            |              |            |

1 1 1 1 1  
5 105

|            |            |            |            |            |            |
|------------|------------|------------|------------|------------|------------|
| ASIAN2_Ema | AACGAAGGTG | TTGTAATCAC | CTGTCAGACA | GGTGATTAGA | CCAGGCCATC |
|            | TTCATCTCAC | CTCAGGGAAT | CTGTGACCTT | TGCCGTTGCA | CACGTGTCTG |
|            | TCTGA      |            |            |            |            |
| FOR_DS1535 | AACGAAGGTG | TTGTAATCAC | CTGTCAGACA | GGTGATTAGA | CCAGGCCATC |
|            | TTCATCTCAC | CTCAGGGAAT | CTGTGACCTT | TGCCGTTGCA | CACGTGTCTG |
|            | TCTGA      |            |            |            |            |
| MAM1_SP134 | AACGAAGGTG | TTGTAATCAC | CTGTCAGACA | GGTGATTAGA | CCAGGCCATC |
|            | TTCATCTCAC | CTCAGGGAAT | CTGTGACCTT | TGCCGTTGCA | CACGTGTCTG |
|            | TCTGA      |            |            |            |            |
| MAST_B203_ | AACAAAGGTG | TTGTAATCAC | CTGTCAGACA | GGTGATTAGA | CCAGGCCAGC |
|            | TTCATCTCAC | CTCAGGGAAT | CTGTGACCTT | TGCCGTTGCA | CACGTGTCTG |
|            | TCTGA      |            |            |            |            |
| SAV1_SE210 | AACGAAGGTG | TTGTAATCAC | CTGTCAGACA | GGTGATTAGA | CCAGGCCATC |
|            | TTCATCTCAC | CTCAGGGAAT | CTGTGACCTT | TGCCGTTGCA | CACGTGTCTG |
|            | TCTGA      |            |            |            |            |

1 1 1 1 1  
5 106

|            |            |            |            |            |            |
|------------|------------|------------|------------|------------|------------|
| ASIAN2_Ema | GTTAGGAAAC | TTCCTCAGGG | AGAAGGTGGC | CAACAACGTG | GCTTTTACCA |
|            | GAAGCACTTG | GAGCTTCTGG | TCTTCCTGAC | ACTTTATGTC | TTCAATCTCA |
|            | TCTCTC     |            |            |            |            |
| FOR_DS1535 | GTTAGGAAAC | TTCCTCAGGG | AGAAGGTGGC | CAACAACGTG | GCTTTTACCA |
|            | GAAGCACTTG | GAGCTTCTGG | TCTTCCCGAC | ACTTTAKGTC | TTCAATCTCA |
|            | TCTCTC     |            |            |            |            |
| MAM1_SP134 | GTTAGGAAAC | TTCCTCAGGG | AGAAGGTGGC | CAACAACGTG | GCTTTTACCA |
|            | GAAGCACTTG | GAGCTTCTGG | TCTTCCCGAC | ACTTTAKGTC | TTCAATCTCA |
|            | TCTCTC     |            |            |            |            |
| MAST_B247_ | GTTAGGAAAC | TTC-TCAGGG | AGAAGGTGGC | CAACAACGTG | GCTTTTACCA |
|            | GAAGCACTTG | GAGCTTCTGG | TCTTCCCGAC | ACTTTATGTC | TTCAATCTCA |
|            | TCTCTC     |            |            |            |            |
| SAV1_SE210 | GTTAGGAAAC | TTCCTCAGGG | AGAAGGTGGC | CAACAACGTG | GCTTTTACCA |
|            | GAAGCACTTG | GAGCTTCTGG | TCTTCCTGAC | ACTTTATGTC | TTCAATCTCA |
|            | TCTCTC     |            |            |            |            |

1 1 1 1 1  
5 105

|            |            |            |            |            |            |
|------------|------------|------------|------------|------------|------------|
| ASIAN2_Ema | TCTGTCTTCC | TGAGTCCTAG | CATCCCTCAG | CTGCTAATGT | CTGAATTCTA |
|            | ACTACCTTTC | ATGACCCATC | ATACAACATT | GTTCCATTTT | CTATGTAAGC |
|            | ATCAT      |            |            |            |            |
| FOR_DS1535 | TCTGTCTTCC | TGAGTCCTAG | CATCCTTCAG | CTGCTAATGT | CTAAATTCTA |
|            | ACTACCTTTC | ATGACCCATC | AAACAACATT | GTTCCATTTT | CTATGTAAGC |
|            | ATCTT      |            |            |            |            |
| MAM1_SP134 | TCTGTCTTCC | TGAGTCCTAG | CATCCTTCAG | CTGCTAACGT | CTAAATTCTA |
|            | ACTACCTTTC | ATGACCCATC | ATACAACATT | GTTCCATTTT | CTATGTAAGC |
|            | ATCAT      |            |            |            |            |
| MAST_B248_ | TTTGTCTTCC | TGAGTCCTAG | CATCCTTCAG | CTGCTAATGT | CTAAATTCTA |
|            | ACTACCTTTC | ATGACCCATC | ATACAACATT | GTTCCATTTT | CTATGTAAGC |
|            | ATCAT      |            |            |            |            |
| SAV1_SE210 | TCTGTCTTCC | TGAGTCCTAG | CATCCTTCAG | CTGCTAATGT | CTAAATTCTA |
|            | ACTACCTTTC | ATGACCCATC | ATACAACATT | GTTCCATTTT | CTATGTAAGC |
|            | ATCAT      |            |            |            |            |

1 1 1 1 1  
5 105

|            |                                   |                          |                          |                          |                          |
|------------|-----------------------------------|--------------------------|--------------------------|--------------------------|--------------------------|
| ASIAN2_Ema | TATGCCATCA<br>CCCTGTCTTG<br>AATAA | TAAGCCTTGG<br>CACATCCATA | GGACCAAGTC<br>TTATTTCTAA | AGTTATGCTG<br>CATGATTTTG | AAAAATTCTG<br>TATCTTTGCT |
| FOR_DS1535 | TATGCCATCA<br>CCCTGTCTTG<br>ARTAA | TAAGCCTTGG<br>CACATCCATA | GGACCAAGTC<br>TTATTTCTAA | AGTTATGCTG<br>CATGATTTTG | AAAAATTCTG<br>TATCTTTGCT |
| MAM1_SP134 | TATGCCATCA<br>CCCTGTCTTG<br>AATAA | TAAGCCTTGG<br>CACATCCATA | GGACCAAGTC<br>TTATTTCTAA | AGTTATGCTG<br>CATGATTTTG | AAAAATTCTG<br>TATCTTTGCT |
| MAST_B250_ | TATGCCTTCA<br>CCCTGTCTTG<br>AATAA | TAAGCCTTGG<br>CACATCCATA | GGACCAAGTC<br>TTATTTCTAA | AGTTATGCTG<br>CATGATTTTG | AAAAATTCTG<br>TATCTTTGCT |
| SAV1_SE210 | TATGCCATCA<br>CCCTGTCTTG<br>AATAA | TAAGCCTTGG<br>CACATCCATA | GGACCAAGTC<br>TTATTTCTAA | AGTTATGCTG<br>CATGATTTTG | AAAAATTCTG<br>TATATTTGCT |

1 1 1 1 1  
5 104

|            |                                  |                          |                         |                          |                          |
|------------|----------------------------------|--------------------------|-------------------------|--------------------------|--------------------------|
| ASIAN2_Ema | CCCATGGCAC<br>CCTCCTTTTC<br>CCAT | ATTTCAAAGT<br>TGGTATAGTT | CTCAGCATT<br>TTGGACCATT | GTGCTCACTG<br>GAGAGCCAGG | GCTGATAGGA<br>AGACAAAGRG |
| FOR_DS1535 | CCCATGGCAC<br>CCTCCTTTTC<br>CCAT | ATTTCAAAGT<br>TGGTATAGTT | CTCAGCATT<br>TTGGACCATT | GTGCTCACTG<br>GAGAGCCAGG | GCTGATAGGA<br>AGACAAAGAG |
| MAM1_SP134 | CCCATGGCAC<br>CCTCCTTTTC<br>CCAT | ATTTCAAAGT<br>TGGTATAGTT | CTCAGCATT<br>TTGGACCATT | GTGCTCACTG<br>GAGAGCCAGG | GCTGATAGGR<br>AGACAAAGAG |
| MAST_B251_ | CCCATGGCAC<br>CCTCCTTTTC<br>CCAT | ATTTCAAAGT<br>TGGTATAGTT | CTCAGCATT<br>ATGGACCATT | GTGCTCACTG<br>GAGAGCCAGG | GCTGATAGGA<br>AGACAAAAG  |
| SAV1_SE210 | CCCATGGCAC<br>CCTCCTTTTC<br>CCAT | ATTTCAAAGT<br>TGGTATAGTT | CTCAGCATT<br>ATGGACCATT | GTGCTCACTG<br>GAGAGCCAGG | GCTGATAGGA<br>AGAAAAACAG |

1 1 1 1 1  
5 104

|            |                                   |                          |                          |                          |                          |
|------------|-----------------------------------|--------------------------|--------------------------|--------------------------|--------------------------|
| ASIAN2_Ema | TCCCTTGGAG<br>GACTTGGGAAG<br>ACAC | GTGAAAAGTG<br>AAAGGACTGG | CTGCTGACTC<br>TGATCTACAT | AAAGCCTCCA<br>CTGAAAATTC | GACTAAAAGA<br>ACCAATGAAA |
| FOR_DS1535 | TCCCTCGGAG<br>GACTTGGGAAG<br>ACAC | GTGAAAAGTG<br>AAAGGCCTGG | CTGCTGACTC<br>TGATCTACAT | AAAGCCTCCA<br>CTGAAAATTC | GACTAAAAGA<br>ACCAATGAAA |
| MAM1_SP134 | TCCCTCGGAG<br>GACTTGGGAAG<br>ACAC | GTGAAAAGTG<br>AAAGGCCTGG | CTGCTGACTC<br>TGATCTACAT | AAAGCCTCCA<br>CTGAAAATTC | GACTAAAAGA<br>ACCAATGAAA |
| MAST_B205_ | TCCCTCAGAG<br>GACTTGGGAAG<br>ACAC | GTGAAAAGTG<br>AAAGGCCTGG | CTGCTGACTC<br>TGATCTATAT | AAAGCCTCCA<br>CTGAAAATTC | GACTAAAAGA<br>ACCAATGAAA |
| SAV1_SE210 | TCCCTCGGAG<br>GACTTGGGAAG<br>ACAC | GTGAAAAGTG<br>AAAGGCCTGG | CTGCTGACTC<br>TGATCTACAT | AAAGCCTCCA<br>CTGAAAATTC | GACTAAAAGA<br>ACCAATGAAA |

1 1 1 1 1  
5 104

|            |                                  |                          |                          |                          |                          |
|------------|----------------------------------|--------------------------|--------------------------|--------------------------|--------------------------|
| ASIAN2_Ema | CTCAACTTGT<br>TTGGCCGATA<br>AAGG | ACTGGCTTCA<br>CTGTGAACAG | GAGACAACCA<br>TGCTATCCAC | CATATATATT<br>TGGTACTGCA | CGTATACTTC<br>AAATTAGGCT |
| FOR_DS1535 | CTCAACTTGT<br>TTGGCCGATA<br>AAGG | ACTGGCTTCA<br>CTGTGAACAG | GAGACAACCA<br>TGCTATCCAC | CATATATATT<br>TGGTACTGCA | CGTATACTTC<br>AAATTAGGCT |
| MAM1_SP134 | CTCAACTTGT<br>TTGGCCGATA<br>AAGG | ACTGGCTTCA<br>CTGTGAACAG | GAGACAACCA<br>TGCTATCCAC | CATATATATT<br>TGGTACTGCA | CGTATACTTC<br>AAATTAGGCT |
| MAST_B253_ | CTTAACTTGT<br>TTGGCCAATA<br>AAGA | ACTGGCTTCA<br>CTGTGAACAG | GAGACAACCA<br>TGCTATCCAC | CATATATATT<br>TGGTACTGCA | CGTATACTTC<br>AAATTAGGCT |
| SAV1_SE210 | CTCAACTTGT                       | ACTGGCTTCA               | GAGACAACCA               | CATATRTATT               | CGTATACTTC               |

TTGGCCGATA CTGTGAACAG TGCTATCCAC TGGTACTGCA AAATTAGGCT  
AAGG

1 1 1 1 1  
5 104

|            |                                  |                          |                          |                          |                          |
|------------|----------------------------------|--------------------------|--------------------------|--------------------------|--------------------------|
| ASIAN2_Ema | CCAGAGAAAC<br>ACAGTTCAGG<br>CCAT | TCACCTTTGA<br>GTAGAGGTGT | GTGGCCAAAT<br>GTGCACAGAC | GGGGATGAAC<br>ATCAA-TAAG | AGGTGATAAG<br>AGACTCCTTT |
| FOR_DS1535 | CCAGAGAAAC<br>ACAGTTCAGG<br>CCAT | TCACCTTTGA<br>GTAGAGGTGT | GTGGCCAAAT<br>GTGCACAGAC | GGGGATGAAC<br>ATCAA-TAAG | AGGTGATAAG<br>AGACTCCTTT |
| MAM1_SP134 | CCAGAGAAAC<br>ACAGTTCAGG<br>CCAT | TCACCTTTGA<br>GTAGAGGTGT | GTGGCCAAAT<br>GTGCACAGAC | GGGGATGAAC<br>ATCAA-TAAG | AGGTGATAAG<br>AGACTCCTTT |
| MAST_B256_ | CCAGAAAAAC<br>ACAGTTCAGG<br>CCAT | TCACCTTTGA<br>GTAGAGATGT | GTGGCCAAAT<br>GTGCACAGAC | GGGGATGAAC<br>ATCAAATAAA | AGGTGATAAG<br>AGACTCCTTT |
| SAV1_SE210 | CCAGAGAAAC<br>ACAGTTCAGG<br>CCAT | TCACCTTTGA<br>GTAGAGGTGT | GTGGCCAAAT<br>GTGCACAGAC | GGGGATGAAC<br>ATCAA-TAAG | AGGTGATAAG<br>AGACTCCTTT |

1 1 1 1 1  
5 104

|            |                                  |                          |                          |                          |                          |
|------------|----------------------------------|--------------------------|--------------------------|--------------------------|--------------------------|
| ASIAN2_Ema | TATAAGTCCC<br>CAACCCTTGT<br>AATG | ATCTAGCTGA<br>GAGCACCTCC | CACACCCTCG<br>CGTGTGCCGG | GTGGCCCAGC<br>ACACCGTGCT | AGGGCTCCAA<br>AAGAGCTAGG |
| FOR_DS1535 | TATAAGTCCC<br>CAACCCTTGT<br>AATG | ATCTGGCTGA<br>GAGCACATCC | CACACCCTCG<br>-GTGTGCCGG | GTGGCCCAGC<br>ACACCATGCT | AGGGCTCCAA<br>AAGAGCTAGG |
| MAM1_SP134 | TATAAGTCCC<br>CAACCCTTGT<br>AATG | ATCTGGCTGA<br>GAGCACCTCC | CACACCCTCG<br>CGTGTGCCGG | GTGGCCCAGC<br>ACACCGTGCT | AGGGCTCCAA<br>AAGAGCTAGG |
| MAST_B207_ | TATAAGTCCC<br>TAACCCTTGT<br>AATA | ATCTGGCTGA<br>GAGCACCTCC | CACACCCTCG<br>CGTGTGCCGG | GTGGCCCAGC<br>ATACCGTGTT | AGGGCTCCAG<br>AAGAGCTAGG |
| SAV1_SE210 | TATAAGTCCC<br>CAACCCTTGT<br>AATG | ATCTGGCTGA<br>GAGCACATCC | CACACCCTCG<br>-GTGTGCCGG | GTGGCCCAGC<br>ACACCATGCT | AGGGCTCCAA<br>AAGAGCTAGG |

1 1 1 1 1  
5 104

|            |                                  |                          |                          |                        |                          |
|------------|----------------------------------|--------------------------|--------------------------|------------------------|--------------------------|
| ASIAN2_Ema | TTTCTGGAGC<br>AAAGGTCCAC<br>GCAG | CCTGGTGGTG<br>AGTTCAAACC | C-AGTGGTTA<br>CACCAGCCAT | AGAGCTATGG<br>TCCTTGGA | CTGCTAACCA<br>CTCTATAGGG |
| FOR_DS1535 | TTTCTGGAGC<br>AAAGGTCCAC<br>GCAG | CCTGGTGGTG<br>AGTTCAAACC | C-AGTGGTTA<br>CACCAGCCAT | AGAGCTATGG<br>TCCTTGGA | CTGCTAACCA<br>CTCTATAGGG |
| MAM1_SP134 | TTTCTGGAGC<br>AAAGGTCCAC<br>GCAG | CCTGGTGGTG<br>AGTTCAAACC | C-AGTGGTTA<br>CACCAGCCAT | AGAGCTATGG<br>TCCTTGGA | CTGCTAACCA<br>CTCTAYAGGG |
| MAST_B259_ | TCTTTGGAGC<br>AAAGGTCCAC<br>TAAT | CCTGGTGGTG<br>AGTTCAAATC | CCAGTGGTTA<br>CACCAGCCAT | AGAGCTATGG<br>TCCTTGGA | CTACAAACCA<br>TCCGCGTGGG |
| SAV1_SE210 | TTTCTGGAGC<br>AAAGGTCCAC<br>GCAG | CCTGGTGGTG<br>AGTTCAAACC | C-AGTGGTTA<br>CACCAACCAT | AGAGCTATGG<br>TCCTTGGA | CTGCTAACCA<br>CTCTATAGGG |

1 1 1 1 1  
5 104

|            |                                  |                          |                          |                          |                          |
|------------|----------------------------------|--------------------------|--------------------------|--------------------------|--------------------------|
| ASIAN2_Ema | TGGCTCCCTC<br>TGCTGTGTCC<br>AGAG | CGAAGAAAGG<br>CCTTGGGGGT | GTGGAAGAAG<br>GGGGAGGCTG | GGCGGGTCCA<br>GAGGGCACAG | GCAACCACAC<br>GAGGAGTTCC |
| FOR_DS1535 | TGGCTCCCTC<br>TGCTGGGTCC<br>AGAG | CGAAGAAAGG<br>CCTTGGGGGT | GTGGAAGAAG<br>GGGGAGGCTG | GGCGGGTCCA<br>GAGGGCACAG | GCAACCACAC<br>GAGGAGTTCC |
| MAM1_SP134 | TGGCTCCCTC<br>TGCTGTGTCC         | CGAAGAAAGG<br>CCTTGGGGGT | GTGGAAGAAG<br>GGGGAGGCTG | GGCGGGTCCA<br>GAGGGCACAG | GCAACCACAC<br>GAGGAGTTCC |

|            |                                         |                          |                          |                          |                          |
|------------|-----------------------------------------|--------------------------|--------------------------|--------------------------|--------------------------|
| MAST_B260_ | AGAG<br>TGGTTCCTC<br>TGCTGTGTCC<br>AAAA | CGAAGAAAGG<br>CCTTGGGGGT | GTGGAAGAAG<br>GGGAAGGCTG | GGCGGGTCCA<br>AAAGACACAA | GCAACCACAC<br>GAAAAATTCC |
| SAV1_SE210 | TGGCTCCCTC<br>TGCTGGGTCC<br>AGAG        | CAAAGAAAGG<br>CCTTGGGGGT | GTGGAAGAAG<br>GGGGAGGCTG | GGCGGGTCCA<br>GAGGGCACAG | GCAAYCACAC<br>GAGGAGTTCC |

1 1 1 1 1  
5 104

|            |                                  |                           |                          |                          |                          |
|------------|----------------------------------|---------------------------|--------------------------|--------------------------|--------------------------|
| ASIAN2_Ema | CAAATCCAGA<br>CAGTGAGGAA<br>ATAG | GGAAGGCTAG<br>GAAC TTT-CC | AGGAAGTCAA<br>AA-GAAGCCA | TTCTAGAAGC<br>CCAAAAAACC | TGTCTCAGAA<br>AAACTGGGTC |
| FOR_DS1535 | CAAATCCAGA<br>CAGTGAGGAA<br>ATAG | GGAAGGCTAG<br>GAAC TTT-CC | AGGAAGTCAA<br>AA-GAAGCCA | TTCTAGAAGC<br>CCAAAAAACC | TGTCTCAGAA<br>AAACTGGGTC |
| MAM1_SP134 | CAAATCCAGA<br>CAGTGAGGAA<br>ATAG | GGAAGGCTAG<br>GAAC TTT-CC | AGGAAGTCAA<br>AA-GAAGCCA | TTCTAGAAGC<br>CCAAAAAACC | TGTCTCAGAA<br>AAACTGGGTC |
| MAST_B261_ | TAAATCCAGA<br>CAGTGAGGAA<br>ATAA | GGAAGGCTAG<br>GAAC TTTTCC | AGGAAGTCAA<br>AAAGAAGCCA | TTCTAGAAGC<br>CCAAAAAACC | TGTCTCAGAA<br>AAACTGGGTC |
| SAV1_SE210 | CAAATCCAGA<br>CAGTGAGGAA<br>ATAG | GGAAGGCTAG<br>GAAC TTT-CC | AGGAAGTCAA<br>AA-GAAGCCA | TTCTAGAAGC<br>CCAAAAAACC | TGTCTCAGAA<br>AAACTGGGTC |

1 1 1 1 1  
5 104

|            |                                  |                          |                          |                          |                          |
|------------|----------------------------------|--------------------------|--------------------------|--------------------------|--------------------------|
| ASIAN2_Ema | CCYGGCCTGG<br>ACTCACTGTC<br>TATG | AGCAAGTAAG<br>ACTTTGGGCT | GCTCTCAACT<br>CAGATCCTTA | CACGAACTGC<br>GACTTCGGGA | ACACTTTTAA<br>GCCGGTTTCT |
| FOR_DS1535 | CCCGGCCTGG<br>ACTCACTGTC<br>TATG | AGCAAGTAAG<br>ACTTTGGGCT | GCTCTCAACT<br>CAGATCCTTA | CACGAACTGC<br>GACTTCGGGA | ACACTTTTAA<br>GCCGGTTTCT |
| MAM1_SP134 | CCCGGCCTGG<br>ACTCACTGTC<br>TATG | AGCAAGTAAG<br>ACTTTGGGCT | GCTCTCAACT<br>CAGATCCTTA | CACGAACTGC<br>GACTTCGGGA | ACACTTTTAA<br>GCCGGTTTCT |
| MAST_B262_ | TCCGGCTTGG<br>ACTCACTGTC<br>TATA | AGCAAGTAAG<br>ACTTTGGGCT | GCTCTCACCT<br>CAGATCCTTA | CACGAACTGC<br>GACTTCGGGA | ACACTTATAA<br>GCCAGTTTCT |
| SAV1_SE210 | CCCGGCCTGG<br>ACTCACTGTC<br>TATG | AGCAAGTAAG<br>ACTTTGGGCT | GCTCTCAACT<br>CAGATCCTTA | CAGGAACTGC<br>GACTTCGGGA | ACACTTTTAA<br>GCCGGTYTCT |

1 1 1 1 1  
5 50

|            |            |            |            |            |            |
|------------|------------|------------|------------|------------|------------|
| ASIAN2_Ema | TAAGGTGGGG | TGCCCCAGCG | CACACCTCTG | ATGAAAACAG | GCTACGCACG |
| FOR_DS1535 | TAAGGTGGGG | TGCCCCAGCG | CACACCTCTG | ATGAAAACAG | GCTACGCACG |
| MAM1_SP134 | TAAGGTGGGG | TGCCCCAGCG | CACACCTCTG | ATGAAAACAG | GCTACGCACG |
| MAST_B264_ | TAAGGTGGGG | TGCCCCAGCG | CACACCTCTG | ATGAAAACAG | GCTACGCACG |
| SAV1_SE210 | TAAGGTGGGG | TGCCCCAGCG | CACACCTCTG | ATGAAAACAG | GCTACGCACG |

1 1 1 1 1  
5 104

|            |                                  |                          |                          |                          |                          |
|------------|----------------------------------|--------------------------|--------------------------|--------------------------|--------------------------|
| ASIAN2_Ema | CAGAAAGCTC<br>ATAGAAGACC<br>CAGC | C-GGAAGCCT<br>CCCAGAGAGA | TGCCAACAGC<br>AAGGCTGCTG | CCTGGAGGCT<br>ATGGCCAGGC | GAGTCCAGAA<br>TGCCCTCTGC |
| FOR_DS1535 | CAGAAAGCTC<br>ATAGAAGACC<br>CAGC | C-GGAAGCCT<br>CCCAGAGAGA | TGCCAACAGC<br>AAGGCTGCTG | CCTGGAGGCT<br>ATGGCCAGGC | GAGTCCAGAA<br>TGCCCTCTGC |
| MAM1_SP134 | CAGAAAGCTC<br>ATAGAAGACC<br>CAGC | C-GGAAGCCT<br>CCCAGAGAGA | TGCCAACAGC<br>AAGGCTGCTG | CCTGGAGGCT<br>ATGGCCAGGC | GAGTCCAGAA<br>TGCCCTCTGC |
| MAST_B209_ | CAGAAAGTTT<br>ATAGAAGACC<br>CAGC | TTAGAAGTTT<br>CCCAGAGAGA | TGCCAACAGC<br>AAGGCTGCTG | CCTGGAGGCT<br>ATGGCCAGGC | GAGTCCAGAA<br>TGCCCTCTGC |
| SAV1_SE210 | CAGAAAGCTC                       | C-GGAAGCCT               | TGCCAACAGC               | CCTGGAGGCT               | GAGTCCAGAA               |



ATAGAAGACC CCCAGAGAGA AAGGCTGCTG ATGGCCAGGC TGCCCTCTGC  
CAGC

1 1 1 1 1  
5 104

|            |                                  |                          |                          |                          |                          |
|------------|----------------------------------|--------------------------|--------------------------|--------------------------|--------------------------|
| ASIAN2_Ema | GCTTATTCTT<br>GTGGGATAGC<br>TGAT | CTTTCCTGTT<br>CTCTTCTCTC | GAAAGAAAAA<br>TCCTTCCTCA | -GCTTT-AAT<br>TCTCCATTTT | TTCAAGCTCT<br>AATCAATTAA |
| FOR_DS1535 | GCTTATTCTT<br>GTGGGATAGC<br>TRAT | CTTTCCTGTT<br>CTCTTCTCTC | GAAAGAAAAA<br>TCCTTCCTCA | -GCTTT-AAT<br>TCTCCATTTT | TTCAAGCTCT<br>AATCAATTAA |
| MAM1_SP134 | GCTTATTCTT<br>GTGGGATAGC<br>TGAT | CTTTCCTGTT<br>CTCTTCTCTC | GAAAGAAAAA<br>TCCTTCCTCA | -GCTTT-AAT<br>TCTCCATTTT | TTCAAGCTCT<br>AATCAATTAA |
| MAST_B210_ | GCTTATTCTT<br>GTGGGATAGC<br>TGAT | CTTTCCTGTT<br>CTCTTCTCTT | GAAAGAAAAA<br>TCCTTCCTCA | AGCTTTTAAT<br>TCTCCATTTT | TTCAAGCTCT<br>AATCAATTAA |
| SAV1_SE210 | GCTTATTCTT<br>GTGGGATAGC<br>TGAT | CTTTCCTGTT<br>CTCTTCTCTC | GAAAGAAAAA<br>TCCTTCCTCA | -GCTTT-AAT<br>TCTCCATTTT | TTCAAGCTCT<br>AATCAATTAA |

1 1 1 1 1  
5 104

|            |                                  |                          |                          |                         |                          |
|------------|----------------------------------|--------------------------|--------------------------|-------------------------|--------------------------|
| ASIAN2_Ema | CTCAGGGTCA<br>GACCATTTTA<br>TTAC | GGAGATGGAT<br>AGTTCTTTAA | GTGAGTCTAA<br>TCACCCTGAT | ACGTTGGCCT<br>CTCAATTCT | TCGTAAGTGT<br>TATCCTTATT |
| FOR_DS1535 | CTCAGGGTCA<br>GACCATTTTA<br>TTAC | GGAGATGGAT<br>ARTTCTTTAA | GTGAGTCTAA<br>TCACCCTGAG | ACGTTGGCCT<br>CTCAATTCT | TCGTAAGTGT<br>TATCCTTATT |
| MAM1_SP134 | CTCAGGGTCA<br>GACCATTTTA<br>TTAC | GGAGATGGAT<br>AGTTCTTTAA | GTGAGTCTAA<br>TCACCCTGAT | ACGTTGGCCT<br>CTCAATTCT | TCGTAAGTGT<br>TATCCTTATT |
| MAST_B265_ | CTCAGGGTCA<br>GACCATTTTA<br>TTAC | GGAGATGGAT<br>AGTTCTTTAA | CTGAGTCTAA<br>TCACCCTGAG | ACGTTGGCCT<br>CTCAATTCT | TCGTAAGTGT<br>TATCCTTATT |
| SAV1_SE210 | CTCAGGGTCA<br>GACCATTTTA<br>TTAC | GGAGATGGAT<br>AGTTCTTTAA | GTGAGTCTAA<br>TCACCCTGAG | ACGTTGGCCT<br>CTCAATTCT | TCGTAAGTGT<br>TATCCTTATG |

1 1 1 1 1  
5 103

|            |                                 |                          |                          |                         |                          |
|------------|---------------------------------|--------------------------|--------------------------|-------------------------|--------------------------|
| ASIAN2_Ema | TCAGGAGCTC<br>TCTGCTAGAT<br>CTC | TCTGGTCCTG<br>ATCTGCAGAC | CAGCTCTGTC<br>AAAGTTCCCG | CTCGGCCAAG<br>TGACCTCCA | CACAGCCCAG<br>ATGGCCTCAT |
| FOR_DS1535 | TCAGGAGCTC<br>TCTGCTAGAC<br>CTC | TCTGCTCCTG<br>ATCTGCAGAC | CAGCTCTGTC<br>AAAGTTCCCG | CTCGGCCAAG<br>TGACCTCCA | GACAGCCCAG<br>ATGGCCTCAT |
| MAM1_SP134 | TCAGGAGCTC<br>TCTGCTAGAT<br>CTC | TCTGGTCCTG<br>ATCTGCAGAC | CAGCTCTGTC<br>AAAGTTCCCG | CTCGGCCAAG<br>TGACCTCCA | GACAGCCCAG<br>ATGGCCTCAT |
| MAST_B267_ | TCAGGAGCTC<br>TCTGCTAGAC<br>CTC | TCTGCTCCTG<br>ATTTGCAGAC | CAGCTCTGTC<br>AGACTTTCCG | CTCGGCCAAG<br>TGACCTCCC | GACAGCCCAG<br>ATGGCCTCAT |
| SAV1_SE210 | TCAGGAGCTC<br>TCTGCTAGAC<br>CTC | TCTGCTCCTG<br>ATCTGCAGAC | CAGCTCTGTC<br>AAAGTTCCCG | CTCGGCCAAG<br>TGACCTCCA | GACAGCCCAG<br>ATGGCCTCAT |

1 1 1 1 1  
5 103

|            |                                 |                          |                          |                         |                          |
|------------|---------------------------------|--------------------------|--------------------------|-------------------------|--------------------------|
| ASIAN2_Ema | TGTGGTTATT<br>AGGTCARGAC<br>ACC | TAATAAATGT<br>CATATCTGTG | CACTGTCCCC<br>TTGGTCACCA | ACTAGACTGC<br>GGGTATTCT | AAGCTGCATG<br>AGTGCCTAGC |
| FOR_DS1535 | TGTGGTTATT<br>AGGTCAGGAC<br>ACC | TAATAAATGT<br>CATATCTGTG | CACTGTCCCC<br>TTGGTCACCA | ACTAGACTGC<br>GGGTATTCT | AAGCTGCATG<br>AGTGCCTAGC |
| MAM1_SP134 | TGTGGTTATT<br>AGGTCAGGAC        | TAATAAATGT<br>CATATCTGTG | CACTGTCCCC<br>TTGGTCACCA | ACTAGACTGC<br>GGGTATTCT | AAGCTGCATG<br>AGTGCCTAGC |

|            |                                 |                          |                          |                          |                          |
|------------|---------------------------------|--------------------------|--------------------------|--------------------------|--------------------------|
| MAST_B269_ | ACC<br>TGTGGTTATT<br>AGGTCAGGAC | TAATAAATGT<br>CTTATCTGTG | CACTGTCCCC<br>TTGGTCACCA | ACTAGACTGC<br>GGGTATTCCC | AAGCTGTATG<br>AGTGCCTAGC |
| SAV1_SE210 | ACC<br>TGTGGTTATT<br>AGGTCAGGAC | TAATAAATGT<br>CATATCTGTG | CACTGTCCCC<br>TTGGTCACCA | ACTAGACTGC<br>GGGTATTCTT | AAGCTGCATG<br>AGTGCCTAGC |

1 1 1 1 1  
5 106

|            |                                    |                          |                          |                         |                          |
|------------|------------------------------------|--------------------------|--------------------------|-------------------------|--------------------------|
| ASIAN2_Ema | AAGTGTTTAT<br>ATACACACAC<br>GTGGCT | CCATATAGTG<br>TCATGCACAC | TGACTCACAG<br>ACATTGCCCC | ATGTCCCCC<br>TAGTCCCAGC | ACACACACAC<br>TGAGCTCACA |
| FOR_DS1535 | AAGTGTTTAT<br>ATACACACAC<br>GTGGCT | CCATATAGTG<br>TCATGCACAC | TGACTCACAG<br>ACATTGCCCC | ATGTCCCCC<br>TAGTCCCAGC | ACACACACAC<br>TGATCTCACA |
| MAM1_SP134 | AAGTGTTTAT<br>ATACACACAC<br>GTGGCT | CCATATAGTG<br>TCATGCACAC | TGACTCACAG<br>ACATTGCCCC | ATGTCCCCC<br>TAGTCCCAGC | ACACACACAC<br>TGAGCTCACA |
| MAST_B211_ | AAGTGTTTAT<br>ATACACACAC<br>GTGGCT | CCATATAGTG<br>TCATGCACAC | TGACTCACAG<br>ACATTGCCC- | ATGTCCCCC<br>TAGTCC-AGC | C-ACACACAC<br>TGATCTCACA |
| SAV1_SE210 | AAGTGTTTAT<br>ATACACACAC<br>GTGGCT | CCATATAGTG<br>TCATGCACAC | TGACTCACAG<br>ACATTGCCCC | ATGTCCCCC<br>TAGTCCCAGC | CCACACACAC<br>TGAGCTCACA |

1 1 1 1 1  
5 103

|            |                                 |                         |                          |                          |                          |
|------------|---------------------------------|-------------------------|--------------------------|--------------------------|--------------------------|
| ASIAN2_Ema | AACATTTGAG<br>CAGAAGGTCT<br>TCA | CCAAGATCTC<br>TGTTACATC | CCTGTCTAGT<br>TGGGCAGCCG | TTGAAGCTGA<br>CTCTTCTTTT | GACAGTTGAA<br>TATCTTTATT |
| FOR_DS1535 | AACATTTGAG<br>CAGAAGGTCT<br>TCA | CCAAGATCTC<br>TGTTACATC | CCTGTCTAGT<br>TGGGCAGCCG | TTGAAGCTGA<br>CTCTTCTTTT | GACAGTTGAA<br>TATCTTTATT |
| MAM1_SP134 | AACATTTGAG<br>CAGAAGGTCT<br>TCA | CCAAGATCTC<br>TGTTACATC | CCTGTCTAGT<br>TGGGCAGCCG | TTGAAGCTGA<br>CTCTTCTTTT | GACAGTTGAA<br>TATCTTTATT |
| MAST_B212_ | AACATTTGAG<br>CAGAAGGTCT<br>TCA | CCAAGATCTC<br>TGTTACATC | TTTGTCTAGT<br>TGGGCAGCTG | TTGAAGCTGA<br>CTCTTCTTTT | GACAGTTGAA<br>TATCTTTATT |
| SAV1_SE210 | AACATTTGAG<br>CAGAAGGTCT<br>TCA | CCAAGATCTC<br>TGTTACATC | CCTGTCTAGT<br>TGGGCAGCCG | TTGAAGCTGA<br>CTCTCCTTTT | GACAGTTGAA<br>TATCTTTATT |

1 1 1 1 1  
5 104

|            |                                  |                          |                          |                          |                          |
|------------|----------------------------------|--------------------------|--------------------------|--------------------------|--------------------------|
| ASIAN2_Ema | TGACCCCTCC<br>TAGACCTT-A<br>AAAT | AGACA-TTTG<br>TTGCAAGCTG | AGAGACACCA<br>GTCAAGCAAG | AGCCTTTGAG<br>GAGCTCAGAG | AAAGAGAAAG<br>ACTAAGTCTC |
| FOR_DS1535 | TGACCCCTCC<br>TAGACCTT-A<br>AAAT | AGACA-TTTG<br>TTGCAAGCTG | AGAGACACCA<br>GTCAAGCAAG | GGCCTTTGAG<br>GAGCTCAGAG | AAAGAGAAAG<br>ACTAAGTCTC |
| MAM1_SP134 | TGACCCCTCC<br>TAGACCTT-A<br>AAAT | AGACA-TTTG<br>TTGCAAGCTG | AGAGACACCA<br>GTCAAGCAAG | AGCCTTTGAG<br>GAGCTCAGAG | AAAGAGAAAG<br>ACTAAGTCTC |
| MAST_B271_ | TTCGCCCTCC<br>T-GACCTTTA<br>AAAC | AGTCAATTAG<br>CCGTAAGCTG | AGAAACACTA<br>GTCAAGCAAG | GGCCTTTGAG<br>GAGCTCAGAG | GAGGAGAAAG<br>ACTAAGTCTC |
| SAV1_SE210 | TGACCCCTCC<br>TAGACCTT-A<br>AAAT | AGACA-TTTG<br>TTGCAAGCTG | AGAGACACCA<br>GTCAAGCAAG | GGCCTTTGAG<br>GAGCTCAGAG | AAAGAGAAAG<br>ACTAAGTCTC |

1 1 1 1 1  
5 103

|            |                                 |                         |                          |                          |                          |
|------------|---------------------------------|-------------------------|--------------------------|--------------------------|--------------------------|
| ASIAN2_Ema | TCCATTAAAR<br>AGCAATAGAT<br>CAG | CCATGATGTA<br>CATCAAAGT | CAGGCCTTGA<br>GCTGCACAGT | GTCAGAAAGA<br>TTCAGCAAA- | GCTGGGGAAG<br>GAAAGCCAGT |
|------------|---------------------------------|-------------------------|--------------------------|--------------------------|--------------------------|

|            |                                 |                           |                          |                           |                           |
|------------|---------------------------------|---------------------------|--------------------------|---------------------------|---------------------------|
| FOR_DS1535 | TCCATTAAAG<br>AGCAATAGAT<br>CAG | CCATGATGCA<br>CATCAAACCTG | CAGGCCTTGA<br>GCTGCACAGT | GTCAGAAAGA<br>TTCAGCAAAA- | GCTGGGGAAG<br>GAAAGCCAGT  |
| MAM1_SP134 | TCCATTAAAG<br>AGCAATAGAT<br>CAG | CCATGATGTA<br>CATCAAACCTG | CAGGCCTTGA<br>GCTGCACAGT | GTCAGAAAGA<br>TTCAGCAAAA- | GCTGGGGAAG<br>GAAAGCCAGT  |
| MAST_B273_ | TCCATTAAAG<br>AGCAACAGAT<br>CAA | CCATGATGCA<br>CATCAAATTG  | CAGGCCTTGA<br>GCTACACAAT | GTCAGAAAGA<br>TTCAGCAAAA  | GCTGGGGAAG<br>GAAAACCCAGT |
| SAV1_SE210 | TCCATTAAAG<br>AGCAATAGAT<br>CAG | CCATGATGCA<br>CATCAAACCTG | CAGGCCTTGA<br>GCTGCACAGT | GTCAGAAAGA<br>TTCAGCAAAA- | GCTGGGGAAG<br>GAAAGCCAGT  |

1 1 1 1 1  
5 103

|            |                                  |                          |                          |                          |                          |
|------------|----------------------------------|--------------------------|--------------------------|--------------------------|--------------------------|
| ASIAN2_Ema | CTCACTCCCC<br>GGTCCCCAAG<br>GGT  | AGTCAGGGTG<br>GTCCCTGGGC | CAGCCAGGTA<br>CATGATGCCC | GAAATGGAAG<br>CCCAGAACGA | TCACCGTCCA<br>ACCTGTTGTT |
| FOR_DS1535 | CTCACTCCCC<br>GGTCCCCAAG<br>GGT  | AGTCAGGGTG<br>GTCCCTGGGC | CAGCCAGGTA<br>CATGATGCCC | GAAATGGAAG<br>CCCAGAACGA | TCACCGTCCA<br>ACCTGTTGTT |
| MAM1_SP134 | CTCACTCCCC<br>GGTCCCCAAG<br>GGT  | AGTCAGGGCG<br>GTCCCTGGGC | CAGCCAGGTA<br>CATGATGCCC | GAAATGGAAG<br>CCCAGAACGA | TCACCGTCCA<br>ACCTGTTGTT |
| MAST_B214_ | TTCACCTCCCC<br>GGTCCCCAAG<br>GGT | AGTCAGGGTG<br>GTCCCTGGGC | CAGCCAGGTA<br>CATGATCGCC | GAAATGGAAG<br>CCCAGAACGA | TCACCGTCCA<br>ACCTGTTGTT |
| SAV1_SE210 | CTCACTCCCC<br>GGTCCCCAAG<br>GGT  | AGTCMGGGTG<br>GTCCCTGGGC | CAGCCAGGTA<br>CATGATGCCC | GAAATGGAAG<br>CCCAGAACGA | TCACCGTCCA<br>ACCTGTTGTT |

1 1 1 1 1  
5 103

|            |                                 |                          |                          |                          |                          |
|------------|---------------------------------|--------------------------|--------------------------|--------------------------|--------------------------|
| ASIAN2_Ema | AGGTCTCTTT<br>AGGCTTTTCC<br>AGC | CTTCATGTCG<br>TAACTTCCCT | CCTTGGCCCA<br>TCCCAGTGGG | AACATCTAGG<br>ATTCTTAATT | CTTACCACTT<br>AGGTAGGTTT |
| FOR_DS1535 | AGGTCTCTTT<br>AGGCTTTTCC<br>AGC | CTTCATGTCG<br>TAACTTCCCT | CCTTGGCCCA<br>TCCCAGTGGG | AACATCTAGG<br>ATTCTTAATT | CTTACCACTT<br>AGGTAGGTTT |
| MAM1_SP134 | AGGTCTCTTT<br>AGGCTTTTCC<br>AGC | CTTCATGTCG<br>TAACTTCCCT | CCTTGGCCCA<br>TCCCAGTGGG | AACATCTAGG<br>ATTCTTAATT | CTTACCACTT<br>AGGTAGGTTT |
| MAST_B277_ | AGGTCTCTTT<br>AGGCTTTTCC<br>AAC | CTTTATGTCG<br>TAACTTCCCT | CCTTGGCCCA<br>TCCCAATGAA | AACATCTAGG<br>ATTCTTAATT | CTTACCACTT<br>AAATAAATTT |
| SAV1_SE210 | AGGTCTCTTT<br>AGGCTTTTCC<br>AGC | CTTCATGTCG<br>TAACTTCCCT | CCTTGGCCCA<br>TCCCAGTGGG | AACATCTAGG<br>ATTCTTAATT | CTTACCACTT<br>AGGTAGGTTT |

1 1 1 1 1  
5 103

|            |                                 |                          |                          |                          |                        |
|------------|---------------------------------|--------------------------|--------------------------|--------------------------|------------------------|
| ASIAN2_Ema | CTGCTAGGCA<br>GTGGGARCTG<br>AGC | GTTTTCAAAG<br>CTCAGAGAAA | CATCTTTGAG<br>TGATACTGTA | TATATTGGGG<br>TGTGGAGGGG | CCCGCCAGG<br>TGCCTAGCC |
| FOR_DS1535 | CTGCTAGGCA<br>GTGGGAGCTG<br>AGC | GTTTTCAAAG<br>CTCAGAGAAA | CATCTTTGAG<br>TGATACTGTA | TATATTGGGG<br>TGTGGAGGGG | CCCGCCAGG<br>TGCCTAGCC |
| MAM1_SP134 | CTGCTAGGCA<br>GTGGGAGCTG<br>AGC | GTTTTCAAAG<br>CTCAGAGAAA | CATCTTTGAG<br>TGATACTGTA | TATATTGGGG<br>TGTGGAGGGG | CCCGCCAGG<br>TGCCTAGCC |
| MAST_B278_ | CTGCTAGGCA<br>GTGGGAGCTG<br>AGC | GTTTTCAAAG<br>CTCAAAGAAA | CATTTTTGAC<br>TGATACTGTA | TATATTGGGG<br>TGTGGTGGGG | CCCGCCAGG<br>TGCCTAGCC |
| SAV1_SE210 | CTGCTAGGCA<br>GTGGGAGCTG<br>AGC | GTTTTCAAAG<br>CTCAGAGAAA | CATCTTTGAG<br>TGATACTGTA | TATATTGGGG<br>TGTGGAGGGG | CCCGCCAGG<br>TGCCTAGCC |

1 1 1 1 1

5 104

|            |                                  |                          |                          |                          |                          |
|------------|----------------------------------|--------------------------|--------------------------|--------------------------|--------------------------|
| ASIAN2_Ema | GGGATGGAAG<br>TGGTGGTTGT<br>CACA | ATTCTCCAAG<br>TAGCTGTTCT | GACYGGGGAA<br>GGAGTCGCTC | GAGGACAAAC<br>TGACTCAGGG | TGGAGAACAG<br>CAACCCCATG |
| FOR_DS1535 | GGGATGGAAG<br>TGGTGGTTGT<br>CACA | ATTCTCCAAG<br>TAGCTGTTCT | GACTGGGGAA<br>GGAGTCGCTC | GAGGACAAAC<br>TGACTCAGGG | TGGAGAACAG<br>CAACCCCATG |
| MAM1_SP134 | GGGATGGAAG<br>TGGTGGTTGT<br>CACA | ATTCTCCAAG<br>TAGCTGTTCT | GACTGGGGAA<br>GGAGTCACTC | GAGGACAAAC<br>TGACTCAGGG | TGGAGAACAG<br>CAACCCCATG |
| MAST_B279_ | GGGATGGAAG<br>TGGCGGTTTT<br>CACA | ATTCTCCAAG<br>TAGCTGTTCT | GACTGGG-AA<br>GGAGTCGCTC | GAGGACAAAC<br>TGACTCAGGG | TGGAGAACAG<br>CAACCCCATG |
| SAV1_SE210 | GGGATGGAAG<br>TGGTGGTTGT<br>CACA | ATTCTCCAAG<br>TAGCTGTTCT | GACTGGGGAA<br>GGAGTCGCTC | GAGGACAAAC<br>TGACTCAGGG | TGGAGAACAG<br>CAACCCCATG |

1 1 1 1 1  
5 104

|            |                                  |                          |                          |                          |                          |
|------------|----------------------------------|--------------------------|--------------------------|--------------------------|--------------------------|
| ASIAN2_Ema | GTGAGGTGCC<br>CTTGCCAGAG<br>GCAC | TCTGGGCACT<br>CAGGGCAGAG | CATCAGAAGA<br>GCCACAGGCC | GCAAAAAGAG<br>AGAGAGAGGC | CTTTGTAACA<br>ATACTTGTGA |
| FOR_DS1535 | GTGAGGTGCC<br>CTTGCCAGAG<br>GCAC | TCTGGGCACT<br>CAGGGCAGAG | CATCAGAAGA<br>GCCACAGGCC | GCAAAAAGAG<br>AGAGAGAGGC | CTTTGTAACA<br>ATACTTGTGA |
| MAM1_SP134 | GTGAGGTGCC<br>CTTGCCAGAG<br>GCAC | TCTGGGCACT<br>CAGGGCAGAG | CATCAGAAGA<br>GCCACAGGCC | GCAAAAAGAG<br>AGAGAGAGGC | CTTTGTAACA<br>ATACTTGTGA |
| MAST_B281_ | GTGAGGTGCC<br>CTTGCTAGAG<br>GCAC | TCTGGGCACT<br>CAGG-CAGAG | CATCAGAAGA<br>GCCACAGGCC | GCAAAA-GAG<br>AGAGAGAGGC | CTTGTAACA<br>ATACTTGTGA  |
| SAV1_SE210 | GTGAGGTGCC<br>CTTGCCAGAG<br>GCAC | TCTGGGCACT<br>CAGGGCAGAG | CATCAGAAGA<br>GCCACAGGCC | GCAAAAAGAG<br>AGAGAGAGGC | CTTTGTAACA<br>ATACTTGTGA |

1 1 1 1 1  
5 103

|            |                                 |                          |                          |                          |                          |
|------------|---------------------------------|--------------------------|--------------------------|--------------------------|--------------------------|
| ASIAN2_Ema | TGTATTATCT<br>GCATTTACAG<br>AAG | CATTTAATCC<br>AGGCAACATT | TTT-CAGCAG<br>TGTGATTTTG | CCCT-GCCAG<br>ACTCTTTGAA | TTGGCCATA<br>AACAACTCCA  |
| FOR_DS1535 | TGTATTATCT<br>GCATTTACAG<br>AAG | CATTTAATCC<br>AGGCAACATT | TTT-CAGCAG<br>TGTGATTTTG | CCCT-GCCAG<br>ACTCTTTGAA | TTGGCCATA<br>AACAACTCCA  |
| MAM1_SP134 | TGTATTATCT<br>GCATTTACAG<br>AAG | CATTTAATCC<br>AGGCAACATT | TTT-CAGCAG<br>TGTGATTTTG | CCCT-GCCAG<br>ACTCTTTGAA | YTGGCCATA<br>AACAACTCCA  |
| MAST_B215_ | TGTATTATCT<br>GCATTTACAG<br>AAA | CATTTAATTC<br>AGACAACATT | TTTTCAGCAG<br>TGTGATTTTG | CCCTCGCCAG<br>ACTCTT-GAA | TTGGCCATA<br>AACAACTCCA  |
| SAV1_SE210 | TGTATTATCT<br>GCATTTACAG<br>AAG | CATTTAATCC<br>AGGCAACATT | TTT-CAGCAG<br>TGTGATTTTG | CCCT-GCCAG<br>ACTCTTTGAA | TTGGTCCATA<br>AACAACTCCA |

1 1 1 1 1  
5 102

|            |                                |                          |                          |                          |                          |
|------------|--------------------------------|--------------------------|--------------------------|--------------------------|--------------------------|
| ASIAN2_Ema | GGCCCAATTG<br>CTGAGACATG<br>GG | GTTCTCTGAG<br>GGAAGAAATG | ATTCCGCAAG<br>GCCTAGGGCC | CCACTGTTGC<br>CATGCTATAC | TGCCTGGACC<br>TCTTGTTGAG |
| FOR_DS1535 | GGCCCAATTG<br>CTGAGACATG<br>GG | GTTCTCTGAG<br>GGAAGAAATG | ATTCCGCAAG<br>GCCTAGGGCC | CCACTGTTGC<br>CATGCTATAC | TGCCTGGACC<br>TCTTGTTGAG |
| MAM1_SP134 | GGCCCAATTG<br>CTGAGACATG<br>GG | GTTCTCTGAG<br>GGAAGAAATG | ATTCCGCAAG<br>GCCTAGGGCC | CCACTGTTGC<br>CATGCTATAC | TGCCTGGACC<br>TCTTGTTGAG |
| MAST_B283_ | GGCCCAATTG<br>CTGAGATATG<br>GA | GTTCTCTGAG<br>GGAAGAAATG | ATTCTGTAAG<br>GCCTAGGGCC | CCACTGTTGC<br>CATGCTATAC | TGCCTGGACC<br>TCTTGTTGAA |

SAV1\_SE210 GGCCAATTG GTTCTCTGAG ATTCCGCAAG CCACTGTTGC TGCCTGGACC  
CTGAGACATG GGAAGAAATG GCCTAGGGCC CATGCTATAC TCTTGTTGAG  
GG

1 1 1 1 1  
5 102

ASIAN2\_Ema AAAGACGGAG ACACTGTGTT CCTGAGGCGA TTTACCTCTG ATCTCTGTCT  
CTGTACCTC TGGACTGGTG CTCAGGGCCT TGCTGAGGAG CTGAGGGGG-  
CA

FOR\_DS1535 AAAGACGGAG ACACTGTGTT CCTGAGGCGA TTTACCTCTG ATCTCTGTCT  
CTGTACCTC TGGACTGGTG CTCAGGGCCT TGCTGAGGAG CTGAGGGGG-  
CA

MAM1\_SP134 AAAGACGGAG ACACTGTGTT CCTGAGGCGA TTTACCTCTG ATCTCTGTCT  
CTGTACCTC TGGACTGGTG CTCAGGGCCT TGCTGAGGAG CTGAGGGGG-  
CA

MAST\_B284\_ AAAGACGGAG ACACTGTGTT CCTGAGGCGA TTTACCTCTG ATCTCTGTCT  
CTGTACCTC TGGACTGGTG CTCAGGGCCT TGCTGAGGAG CTAAGAAAA  
CA

SAV1\_SE210 AAAGACGGAG ACACTGTGTT CCTGAGGCGA TTTACCTCTG ATCTCTGTCT  
CTGTACCTC TGGACTGGTG CTCAGGGCCT TGCTGAGGAG CTGAGGGGG-  
CA

1 1 1 1 1  
5 104

ASIAN2\_Ema TTTTGATTGA TGTA AAAATCC AGTGACCCAA GGGAGGAAGC CCTAATGTTA  
GACTTCTCAC CAACTGTGGG TGGGATTTGG GACCAGATTT AAA-TAAATT  
TGGA

FOR\_DS1535 TTTTGATTGA TGTA AAAATCC AGTGACCCAA GGGAGGAAGC CCTAATGTTA  
GACTTCTCAC CAACTGTGGG TGGGATTTGG GACCAGATTT AAA-TAAATT  
TGGA

MAM1\_SP134 TTTTGATTGA TGTA AAAATCC AGTGACCCAA GGGAGGAAGC CCTAATGTTA  
GACTTCTCAC CAACTGTGGG TGGGATTTGG GACCAGATTT AAA-TAAATT  
TGGA

MAST\_B285\_ TTTTGATTGA TGTA AA-TCC AGTGACCCAA AGGAGGAAGC CCTAATGTTA  
GACTTCTCAC CAACTGTGGG TGGGATT-GG GACCAAATTT AAAATAAAGT  
TTAA

SAV1\_SE210 TTTTGATTGA TGTA AAAATCC AGTGACCCAA GGGAGGAAGC CCTAATGTTA  
GACTTCTCAC CAACTGTGGG TGGGATTTGG GACCAGATTT AAA-TAAATT  
TGGA

1 1 1 1 1  
5 102

ASIAN2\_Ema AATTATTAGA GCAAATTTGC TCATACATTT TGCTGAATAT TCAAAATAAT  
TCATGTTTCC TCCCCTCTT TAACATAAGA GCTTTGGGTA GGCTTTCCCT  
TG

FOR\_DS1535 AATTATTAGA GCAAATTTGC TCATACATTT TCCTGAATAT TCAAAATAAT  
TCATGTTTCC TCCCCTCTT TAACATAAGA GCTTTGGGTA GGCTTTCCCT  
TG

MAM1\_SP134 AATTATTAGA GCAAATTTGC TCATACATTT TGCTGAATAT TCAAAATAAT  
TCATGTTTCC TCCCCTCTT TAACATAAGA GCTTTGGGTA GGCTTTCCCT  
TG

MAST\_B286\_ AATTATTAGA GCAAATTTGC TTATACATTT TGCTGAATAT TCAAAATAAT  
TCATGTTTCC TCCCCTCTT TAACATAAGA GCTTTGGGTA GGCTTTCCCT  
TG

SAV1\_SE210 AATTATTAGA GCAAATTTGC TCATACATTT TGCTGAATAT TCAAAATAAT  
TCATGTTTCC TCCCCTCTT TAACATAAGA GCTTTGGGTA GGCTTTCCCT  
TG

1 1 1 1 1  
5 102

ASIAN2\_Ema ACCAAGACAG ATCCTGAGCC TTCGAAGAGG CTGCCACACT GCCCAGCGG  
CCCCACACGC CAGGGGCTGG AAGTGGGCTC GCTTAGGGCA GGGACACCTC  
TC

FOR\_DS1535 ACCAAGACAG ATCCTGAGCC TTCGAAGAGG CTGCCACACT GCCCAGCGG  
CCCCACACGC CAGGGGCTGG AAGTGGGCTC GCTTAGGGCA GGGRCACCTC  
TC

MAM1\_SP134 ACCAAGACAG ATCCTGAGCC TTCGAAGAGG CTGCCACACT GCCCAGCGG

|            |            |            |            |            |            |
|------------|------------|------------|------------|------------|------------|
|            | CCCCACACGC | CAGGGGYTGG | AAGTGGGCTC | GCTTAGGGCA | GGGACACCTC |
| MAST_B287_ | TC         | ATTAAGATAG | ATCCCGAGCC | TTCGAAGAGG | GTGCCACACT |
|            | CCCCACACGC | CAGGGGCTGG | AAGTGGTCTC | GCTTAGGGCA | GGGACACCTC |
| SAV1_SE210 | TC         | ACCAAGACAG | ATCCTGAGCC | TTCGAAGAGG | CTGCCACACT |
|            | CCCCACACGC | CAGGGRCTGG | AAGTGGGCTC | GCTTAGGGCA | GGGACACCTC |
|            | TC         |            |            |            |            |
| 1 1 1 1 1  |            |            |            |            |            |
| 5 102      |            |            |            |            |            |
| ASIAN2_Ema | TCCTACACAG | CTCAGTTCGC | CTGACTGCAG | CTTTCTGAGT | TCACCTAGTG |
|            | CTTCTCCCAG | ACAAAATCAT | GACTAAGCAG | AGGCAAAATT | CATGTTATGC |
|            | TC         |            |            |            |            |
| FOR_DS1535 | TCCTACACAG | CTCAGTTCGC | CTGACTGCAG | CTTTCTGAGT | TCACCTAGTG |
|            | CTTCTCCCAG | ACAAAATCAT | GACTAAGCAA | AGGCAAAATT | CATGTTATGC |
|            | TC         |            |            |            |            |
| MAM1_SP134 | TCCTACACAG | CTCAGTTCGC | CTGACTGCAG | CTTTCTGAGT | TCACCTAGTG |
|            | CTTCTCCCAG | ACAAAATCAT | GACTAAGCAA | AGGCAAAATT | CATGTTATGC |
|            | TC         |            |            |            |            |
| MAST_B288_ | TTTTATACAG | CTCAGGTCGC | CTGACTGCAG | CTTTCTGAGT | TGACCTAGTG |
|            | CTTCTGCCAG | ACAAAATCAT | GACTAAGCAA | AGGCAAAATT | CATGTTATGC |
|            | TC         |            |            |            |            |
| SAV1_SE210 | TCCTACACAG | CTCAGTTCGC | CTGACTGCRG | CTTTCTGAGT | TCACCTAGTG |
|            | CTTCTCCCAG | ACAAAATCAT | GACTAAGCAA | AGGCAAAATT | CATGTTATGC |
|            | TC         |            |            |            |            |
